# Supplementary material for: Multi–cell type gene coexpression network analysis reveals coordinated interferon response and cross–cell type correlations in systemic lupus erythematosus
Source: HighWire-hosted journal article supplement (doi:10.1101/gr.265249.120), 2021-03-05
Supplement: Supplemental_Table_S1.xlsx [file Supplemental_Table_S1.xlsx]

## Sheet: SLE_Cohort
Supplemental Table S1. Demographics and Clinical details of the SLE Cohort (related to Figure 1A).
S.No.	Individual ID	Donor ID	Donor	Visit #	Sample ID	Source	Disease Group	Gender	Age	demographics	Race	Ethnicity	Disease status	IFN signature pos/neg	SLEDAI	notes	Flare	Flare severity	symptoms at time of collection	symptoms	BILAG	Severity Category	Sub Catergory 0= unknown	Affected Organ	BILAG	Bilag severity	Treatment	Steroids Y/N	Prednisone	Medrol	HC4	HCQ	Leflunomide	Azathrioprine	Benlysta	Orencia	MTX	Relafen	warfarin	plaquenil	MMF	Other	Years of disease	Date Aquired
1	S3004	S3004a	SLE-SAN-004a (S3004a)	1	SLE77	SAN	SLE	F	53	Hispanic, 53, F	White	Hispanic/Latino	active	pos	0		no		ANA+, Lupus Nephritis	history of lupus nephritis		mild	R	R			HCQ (200mg/bid), Prednesone (7.5mg/QD), Cellcept (500mg/bid)	steroid	y	n	n	y	n	n	n	n	n	n	n	n	y	n	NA	2015-08-26
2	S1055	S1055d	SLE-UCSD-1055d	4	SLE32	UCSD	SLE	F	19	White, 19, NH, F	White	Non-Hispanic/Latino	active	pos	6		no	no	dsDNA, low C'	Positive ds-DNA, Low complement	MC:C; Renal C	moderate	R	R	MC:C, Renal:C	C	prednisone 32.5 mg/d; MMF 3g/day; ASA 80mg/day; HC4 400 mg/day	steroid	y	n	y	n	n	n	n	n	n	n	n	n	y	y	0	2015-04-14
3	S1055	S1055e	SLE-UCSD-1055e	5	SLE37	UCSD	SLE	F	20	White, 20, NH, F	White	Non-Hispanic/Latino	active	pos	6		no	no	dsDNA, low C' (renal history)	Positive ds-DNA, Low complement, Renal history	MC:C; Renal C	moderate	R	R	MC:C, Renal:C	C	plaquenil 400 mg/day; prednisone, 32.5 mg/d, MMF 3 g/day, ASA 81 mg	steroid	y	n	n	n	n	n	n	n	n	n	n	y	y	y	1	2015-05-05
4	S1055	S1055f	SLE-UCSD-1055f	6	SLE45	UCSD	SLE	F	20	White, 20, NH, F	White	Non-Hispanic/Latino	active	pos	8	flare, mild	yes	mild	malar rash, arthritis, dsDNA, low complement	Malar Rash, Nonerosive arthritis, Positive ds-DNA, Low complement	MC:B, Renal C, MS:B	moderate	R	R	MC:B, MS:B, Renal C	C (MCSB)	ASA 81mg/day, HC4 400 mg/day, prednisone 32.5 mg/day, Cellcept 3g/day	steroid	y	n	y	n	n	n	n	n	n	n	n	n	y	y	1	2015-05-19
5	S1055	S1055a	SLE-UCSD-1055a	1	SLE06	UCSD	SLE	F	19	White, 19, NH, F	White	Non-Hispanic/Latino	active	pos	12	FLARE, severe renal	yes	severe	active renal, low C', dsDNA	Active renal disease, Positive ds-DNA, Low complement	Renal A	severe	R	R	Renal A	A	plaq, pred	steroid	y	n	n	n	n	n	n	n	n	n	n	y	n	n	0	2014-09-30
6	S1055	S1055b	SLE-UCSD-1055b	2	SLE17	UCSD	SLE	F	19	White, 19, NH, F	White	Non-Hispanic/Latino	active	pos	16	FLARE, severe	yes	severe	active renal, dsDNA, low C'	Active renal disease, Positive ds-DNA, Low complement	Renal A	severe	R	R	Renal A	A	rivaroxaban, plaq, pred	steroid	y	n	n	n	n	n	n	n	n	n	n	y	y	y	0	2014-12-02
7	S1055	S1055c	SLE-UCSD-1055c	3	SLE21	UCSD	SLE	F	19	White, 19, NH, F	White	Non-Hispanic/Latino	active	pos	16	FLARE; no Quest info; monocytes stored in Trizol	yes	none	active renal, dsDNA, low C'	Active renal disease, Positive ds-DNA, Low complement	Renal A	severe	R	R	Renal A	A	rivaroxaban, plaq, pred, MMF	steroid	y	n	n	n	n	n	n	n	n	n	n	y	y	y	0	2014-12-16
8	S1082	S1082a	SLE-UCSD-1082a	1	SLE69	UCSD	SLE	F	19	Asian, 19, NH, F	Asian	Non-Hispanic/Latino	active	pos	9		no	no	malar rash, photosensitivity, active renal, dsDNA, low C', vasculitis	Malar Rash, Photosensitivity, Active renal disease, Positive ds-DNA, Low complement, Vasculitis	Renal C; MC:C	severe	R	R	Renal C; MC-C	C	MMF 1.5g, HCQ, 200 mg, Prednisone 5 mg	steroid	y	n	n	y	n	n	n	n	n	n	n	n	y	n	0	2015-08-11
9	S3008	S3008a	SLE-SAN-008a	1	SLE90	SAN	SLE	M	27	Hispanic, 27, M	White	Hispanic/Latino	active	pos	14	FLARE; Migraine-8, Arthritis-4, Rash-2	yes		Anemia, Arthritis, Discoid Lupus, Lupus Nephritis, Malar Rash, Photosensitivity, Ulcers	nonerosive arthritis, malar rash, migraine		severe	R	R			Prednisone (7.5mg/QD), Mycophenolate (1000mg/BID)	steroid	y	n	n	n	n	n	n	n	n	n	n	n	y	n	NA	2015-09-21
10	S3011	S3011a	SLE-SAN-011a	1	SLE94	SAN	SLE	F	77	Hispanic, 77, F	White	Hispanic/Latino	active	pos	4	FLARE; Arthritis-4			ANA+, Anemia, Arthritis, Retinal Issues, Sjorgen's	nonerosive arthritis		mild	MCS	MS			Prednisone (5mg/QD), Methotrexate inj (2.5mg/QW)	steroid	y	n	n	n	n	n	n	n	y	n	n	n	n	n	NA	2015-09-29
11	S1083	S1083b	SLE-UCSD-1083b	2	SLE74	UCSD	SLE	F	50	White, 50, NH, F	White	Non-Hispanic/Latino	active	pos	4	Mild Flare	yes	mild	Nonerosive arthritis	Nonerosive arthritis	MS:B	mild	MCS	MS	MS:B	B	celebrex	no steroid	n	n	n	n	n	n	n	n	n	n	n	n	n	y	12	2015-08-25
12	S1065	S1065a	SLE-UCSD-1065a	1	SLE29	UCSD	SLE	F	41	White, 41, Hispanic, F	White	Hispanic/Latino	active	pos	8	FLARE, severe; No quest info.	yes	severe	arthritis	Nonerosive arthritis	Heme A, MS:A	moderate	MCS	MS	Heme:A; Mr:A?	A	prednisone 5 mg/day	steroid	y	n	n	n	n	n	n	n	n	n	n	n	n	n	9	2015-03-19
13	S3010	S3010a	SLE-SAN-010a	1	SLE92	SAN	SLE	F	23	White, 23, NH, F	White	Non-Hispanic/Latino	active	pos	6	Flare; Arthritis-4, Alopecia-2	yes		ANA+, Arthritis, Pleuritis/Pericarditis	nonerosive arthritis, alopecia		moderate	MCS	MS			Plaquenil (300mg/QD)	no steroid	n	n	n	n	n	n	n	n	n	n	n	y	n	n	NA	2015-09-28
14	S1057	S1057a	SLE-UCSD-1057a	1	SLE10	UCSD	SLE	F	40	Asian, 40, NH, F	Asian	Non-Hispanic/Latino	active	pos	2	FLARE, severe	yes	severe	mucosal ulcers	Mucosal ulcers	MS:B, MC:C	mild	MCS	MCS	MS:B, MC:C	B	pred	steroid	y	n	n	n	n	n	n	n	n	n	n	n	n	n	0	2014-10-14
15	S3002	S3002a	SLE-SAN-002a (S3002a)	1	SLE73	SAN	SLE	M	23	Asian, 23, Male	Asian	Non-Hispanic/Latino	active	pos	4	Flare; Arthritis-4,	yes		Arthritis, Discoid Lupus, Malar Rash, Photosensitivity, Pleuritis/Pericarditis	nonerosive arthritis		mild	MCS	MCS			Plaquenil (400mg/QD)	no steroid	n	n	n	n	n	n	n	n	n	n	n	y	n	n	NA	2015-08-20
16	S1065	S1065c	SLE-UCSD-1065c	3	SLE95	UCSD	SLE	F	40	Hispanic, 40, F	White	Hispanic/Latino	active	pos	4		no	no	Discoid rash, cutaneous lesions, Low complement	Discoid rash, cutaneous lesions, Low complement	MS:C; MC:B	mild	MCS	MCS	MS C; MC B	C	prednisone 5mg/day	steroid	y	n	n	n	n	n	n	n	n	n	n	n	n	n	9	2015-09-01
17	S2018	S2018a	SLE-UCSD-2018a	1	SLE42	UCSD	SLE	F	44	?, 44, Hispanic, F	not listed	Hispanic/Latino	active	pos	6	flare, mild	yes	mild	mucosal ulcer, arthritis	Mucosal ulcers, Nonerosive arthritis	MS:A, MC:B	moderate	MCS	MCS	MS:A, MC:B	A	MTX 15mg/week; prednisone 5mg/day; orencia (CTLA-4); plaquenil 400mg/day	steroid	y	n	n	n	n	n	n	y	y	n	n	y	n	n	13	2015-05-13
18	S1083	S1083a	SLE-UCSD-1083a	1	SLE70	UCSD	SLE	F	50	White, 50, NH, F	White	Non-Hispanic/Latino	active	pos	8		no	no	mucosal ulcers, nonerosive arthritis	Mucosal ulcers, Nonerosive arthritis	MC:C; MS:B	moderate	MCS	MCS	MC:C, MS:B	B	celebrex, 200 mg	no steroid	n	n	n	n	n	n	n	n	n	n	n	n	n	y	12	2015-08-11
19	S3003	S3003a	SLE-SAN-003a (S3003a)	1	SLE76	SAN	SLE	F	40	Asian, 40, Female	Asian	Non-Hispanic/Latino	active	pos	8	Flare; Arthritis-4, Rash-2, Alopecia-2	yes		ANA+, Anemia, Arthritis, Discoid Lupus, Malar Rash, Photosensitivity	nonerosive arthritis, rash, alopecia		moderate	MCS	MCS			Plaquenil (200mg/bid), Benlysta/QM	no steroid	n	n	n	n	n	n	y	n	n	n	n	y	n	n	NA	2015-08-24
20	S1081	S1081a	SLE-UCSD-1081a	1	SLE78	UCSD	SLE	F	41	White, 41, NH, F	White	Non-Hispanic/Latino	active	pos	6		no	no	Discoid rash, cutaneous lesions, Photosensitivity, Nonerosive arthritis	Discoid rash, cutaneous lesions, Photosensitivity, Nonerosive arthritis	MC:B; MS:B	moderate	MCS	MCS	MC B; MS B	B	plaquenil (400gm/day)	no steroid	n	n	n	n	n	n	n	n	n	n	n	y	n	n	0	2015-09-01
21	S3007	S3007a	SLE-SAN-007a	1	SLE89	SAN	SLE	F	20	Hispanic, 20, F	White	Hispanic/Latino	active	pos	7	FLARE; Arthritis-4, Rash-2	yes		Anemia, Arthritis, Malar Rash, Pleuritis/Pericarditis	nonerosive arthritis, malar rash		moderate	MCS	MCS			Prednisone (5mg/QD), Plaquenil (300mg/QD), Ibuprofen (800mg/PRN)	steroid	y	n	n	n	n	n	n	n	n	n	n	y	n	y	NA	2015-09-21
22	S1077	S1077a	SLE-UCSD-1077a	1	SLE58	UCSD	SLE	F	66	White, 66, NH, F	White	Non-Hispanic/Latino	active	pos	6	Mild Flare	yes	mild	Nonerosive arthritis	Nonerosive arthritis	MC:C; MS:A	moderate	MCS	MCS	MC-C; MS-A	A		no steroid	n	n	n	n	n	n	n	n	n	n	n	n	n	n	41	2015-07-21
23	S1022	S1022c	SLE-UCSD-1022c	1	SLE05	UCSD	SLE	F	46	White, 46, NH, F	White	Non-Hispanic/Latino	active	pos	10		no	no	malar rash	Malar Rash	MS:B, MC:B	severe	MCS	MCS	MS:B, MC:B	B	pred	steroid	y	n	n	n	n	n	n	n	n	n	n	n	n	n	24	2014-09-30
24	S1065	S1065b	SLE-UCSD-1065b	2	SLE36	UCSD	SLE	F	41	white, 41, Hispanic, F	White	Hispanic/Latino	active	pos	12	flare, mild	yes	mild	malar rash, mucosal ulcers, photosensitivity, arthritis, low C'	Malar Rash, Photosensitivity, Mucosal ulcers, Nonerosive arthritis, Low complement	MC:B; MS:B	severe	MCS	MCS	MC:B. MS:B	B	prednisone 5mg/day	steroid	y	n	n	n	n	n	n	n	n	n	n	n	n	n	9	2015-05-05
25	S3005	S3005a	SLE-SAN-005a (S3005a)	1	SLE81	SAN	SLE	F	34	Asian, 34, Pacific Islander, F	Asian	Pacific Islander	active	pos	14	Flare; Migraine-8, Arthritis-4, Alopecia-2	yes		Arthritis, Malar, Photosensitivity, Retinal Issues, Seizures, Sjogren's Ulcers	nonerosive arthritis, alopecia, migraine		severe	MCS	MCS			None	no steroid	n	n	n	n	n	n	n	n	n	n	n	n	n	n	NA	2015-09-09
26	S2010	S2010b	SLE-UCSD-2010b	1	SLE44	UCSD	SLE	F	39	White, 39, NH, F	White	Non-Hispanic/Latino	active	pos	2		no	no	discoid rash/cutaneous lesion	Discoid rash, cutaneous lesions	MC:B	mild	MCS	MC	MC:B	B	plaquenil 400 mg/day	no steroid	n	n	n	n	n	n	n	n	n	n	n	y	n	n	13	2015-05-13
27	S1076	S1076a	SLE-UCSD-1076a	1	SLE60	UCSD	SLE	F	35	White, 35, NH, F	White	Non-Hispanic/Latino	active	pos	4		no	no	malar rash, low C'	Malar Rash, Low complement	MC:C	mild	MCS	MC	MC-C	C	none listed	no steroid	n	n	n	n	n	n	n	n	n	n	n	n	n	n	1	2015-07-16
28	S1052	S1052b	SLE-UCSD-1052b	1	SLE11	UCSD	SLE	F	34	Asian, 34, NH, F	Asian	Non-Hispanic/Latino	active	pos	6		no	no	dsDNA, low C'	Positive ds-DNA, Low complement	MC:C	moderate	MCS	MC	MC:C	C	plaq	no steroid	n	n	n	n	n	n	n	n	n	n	n	y	n	n	11	2014-10-16
29	S1084	S1084a	SLE-UCSD-1084a	1	SLE84	UCSD	SLE	F	39	White, 39, NH, F	White	Non-Hispanic/Latino	active	pos	8	Severe Flare	yes	severe	Malar Rash, Discoid rash, cutaneous lesions, Serositis	malar rash, discoid rash, serositis	Const C; MC:B, Cardioresp B	moderate	MCS	MC	MC:B; Constitutional C; Cardioresp B	B	tacrolimus (topical, daily, 14 days), prednison (60mg/day, 14 days), plaquenil (400mg/day), quinacrine (100mg/day)	steroid	y	n	n	n	n	n	n	n	n	n	n	y	n	y	39	2015-09-16
30	S2017	S2017a	SLE-UCSD-2017a	1	SLE39	UCSD	SLE	F	23	Asian, 23, NH, F	Asian	Non-Hispanic/Latino	inactive	pos	4		no	no	dsDNA, low complement	Positive ds-DNA, Low complement	Renal C	mild	R	R	Renal C	C	prednisone 10 mg/day; Cellcept 2g/day; plaquenil 400mg/day	steroid	y	n	n	n	n	n	n	n	n	n	n	y	y	n	1	2015-05-06
31	S1070	S1070a	SLE-UCSD-1070a	1	SLE50	UCSD	SLE	F	33	White, 33, Hispanic, F	White	Hispanic/Latino	inactive	pos	0		no	no	none		Renal D; Neuro D	mild	R	R	Renal:D, Neuro:D	D	prednisone 10mg/day; HC4 100mg/day	steroid	y	n	y	n	n	n	n	n	n	n	n	n	n	n	16	2015-05-26
32	S1060	S1060a	SLE-UCSD-1060a	1	SLE23	UCSD	SLE	F	32	White, 32, NH, F	White	Non-Hispanic/Latino	inactive	pos	2		no	no	none		MC:C, Heme C	mild	MCS	MC	MC:C, Heme:C	C	none listed	no steroid	n	n	n	n	n	n	n	n	n	n	n	n	n	n	0	2015-02-19
33	S1072	S1072a	SLE-UCSD-1072a	1	SLE57	UCSD	SLE	F	40	Asian, 40, NH, F	Asian	Non-Hispanic/Latino	inactive	pos	2		no	no	none		MC:C	mild	MCS	MC	MC:C	C		no steroid	n	n	n	n	n	n	n	n	n	n	n	n	n	n	3	2015-06-23
34	S1060	S1060b	SLE-UCSD-1060b	2	SLE71	UCSD	SLE	F	33	White, 33, NH, F	White	Non-Hispanic/Latino	inactive	pos	1		no	no	hematology	Hematological disorder	Heme C	mild	H	H	Heme:C	C	HCQ 400 mg	no steroid	n	n	n	y	n	n	n	n	n	n	n	n	n	n	1	2015-08-05
35	S1079	S1079a	SLE-UCSD-1079a	1	SLE66	UCSD	SLE	F	21	Hispanic, 21, F	White	Hispanic/Latino	inactive	pos	0		no	no	none	none	Heme C	mild	H	H	Heme:C	C	Imuran (50 mg) Prednison (20 mg) HCQ (400 mg)	steroid	y	n	n	y	n	y	n	n	n	n	n	n	n	n	1	2015-08-05
36	S1073	S1073a	SLE-UCSD-1073a	1	SLE56	UCSD	SLE	F	63	White, 63, NH, F	White	Non-Hispanic/Latino	inactive	pos	0		no	no	none listed		0	mild	0	0	0		MMF (1g/bid)	no steroid	n	n	n	n	n	n	n	n	n	n	n	n	y	n	20	2015-07-09
37	S1074	S1074a	SLE-UCSD-1074a	1	SLE65	UCSD	SLE	F	44	Black, 44, NH, F	Black	Non-Hispanic/Latino	inactive	pos	4		no	no	dsDNA, low C'	Positive ds-DNA, Low complement	0	mild	0	0	0		HC4 (400 mg/day)	steroid	n	n	y	n	n	n	n	n	n	n	n	n	n	n	12	2015-07-15
38	S1075	S1075a	SLE-UCSD-1075a	1	SLE59	UCSD	SLE	F	59	Hispanic, 59, F	White	Hispanic/Latino	inactive	pos	4		no	no	dsDNA, low C'	Positive ds-DNA, Low complement	0	mild	0	0				no steroid	n	n	n	n	n	n	n	n	n	n	n	n	n	n	37	2015-07-15
39	S1020	S1020c	SLE-UCSD-1020c	1	SLE61	UCSD	SLE	F	31	White, 31, NH, F	White	Non-Hispanic/Latino	inactive	pos	4		no	no	dsDNA, low C'	Positive ds-DNA, Low complement	0	mild	0	0	0		plaquenil (400gm/day)	no steroid	n	n	n	n	n	n	n	n	n	n	n	y	n	n	8	2015-07-21
40	S2014	S2014a	SLE-UCSD-2014a(1059c redraw)	3	SLE24	UCSD	SLE	F	35	White, 35, NH, F	White	Non-Hispanic/Latino	active	neg	1	Active based on BILAG	no	no	none		Neuropsych B, Const B	mild	N	N	neurophych:B, Constitutional:C	B	medrol 36mg/day; Cellcept 3g/day	steroid	n	y	n	n	n	n	n	n	n	n	n	n	y	n	11	2015-02-25
41	S1024	S1024d	SLE-UCSD-1024d	1	SLE43	UCSD	SLE	F	39	White, 39, Hispanic, F	White	Hispanic/Latino	active	neg	6		no	no	arthritis, low complement	Nonerosive arthritis, Low complement	MS:B	moderate	MCS	MS	MS:B	B	HC4 20 mg/day (hydrocortisone)	steroid	n	n	y	n	n	n	n	n	n	n	n	n	n	n	5	2015-05-12
42	S1054	S1054a	SLE-UCSD-1054a	1	SLE04	UCSD	SLE	F	19	White, 19, NH, F	White	Non-Hispanic/Latino	active	neg	4		no	no	arthritis	Nonerosive arthritis	MS:C	mild	MCS	MS	MS:C	C	plaq	no steroid	n	n	n	n	n	n	n	n	n	n	n	y	n	n	0	2014-09-25
43	S1018	S1018b	SLE-UCSD-1018b	1	SLE18	UCSD	SLE	F	44	White, 44, Hispanic, F	White	Hispanic/Latino	active	neg	4	Aria sort	no	no	arthritis	Nonerosive arthritis	MS:B	mild	MCS	MS	MS:B	B	plaq	no steroid	n	n	n	n	n	n	n	n	n	n	n	y	n	n	25	2015-01-06
44	S1059	S1059b	SLE-UCSD-1059b	2	SLE20	UCSD	SLE	F	35	White, 35, NH,F	White	Non-Hispanic/Latino	active	neg	0	active but SLEDAI is 0	no	no	none		Neuropsych B, MS:C, Const C	mild	MCS	MS	Neurophych:B, MS:C, Const:C	C (NEURO B)	Medrol (40 mg), MMF (3g)	steroid	n	y	n	n	n	n	n	n	n	n	n	n	y	n	11	2015-01-15
45	S1054	S1054b	SLE-UCSD-1054b	2	SLE63	UCSD	SLE	F	19	White, 19, NH, F	White	Non-Hispanic/Latino	active	neg	4	mild FLARE	yes	mild	arthritis	Nonerosive arthritis	MS:B	mild	MCS	MS	MS-B	B	HC4 (hydrocortisone 400 mg/day)	steroid	n	n	y	n	n	n	n	n	n	n	n	n	n	n	0	2015-07-16
46	S1086	S1086a	SLE-UCSD-1086a	1	SLE86	UCSD	SLE	F	65	White, 65, NH, F	White	Non-Hispanic/Latino	active	neg	4		no	no	Nonerosive arthritis	Nonerosive arthritis	MS:A	mild	MCS	MS	MS A	A	benlysta (400mg/month), HCQ (400mg/daily)	no steroid	n	n	n	y	n	n	y	n	n	n	n	n	n	n	13	2015-09-16
47	S1088	S1088a	SLE-UCSD-1088a	1	SLE88	UCSD	SLE	F	48	White, 48, NH, F	White	Non-Hispanic/Latino	active	neg	4		no	no	Nonerosive arthritis	nonerosive arthritis, Raynauds, fibromyalgia	MS:B	mild	MCS	MS	MS:B	B		no steroid	n	n	n	n	n	n	n	n	n	n	n	n	n	n	20	2015-09-17
48	S1062	S1062a	SLE-UCSD-1062a	1	SLE26	UCSD	SLE	F	35	White, 35, Hispanic, F	White	Hispanic/Latino	active	neg	8		no	no	arthritis, dsDNA, low C'	Nonerosive arthritis, Positive ds-DNA, Low complement	MS:B	moderate	MCS	MS	MS:B	B	plaquenil 400mg/day	no steroid	n	n	n	n	n	n	n	n	n	n	n	y	n	n	10	2015-03-04
49	S1068	S1068a	SLE-UCSD-1068a	1	SLE40	UCSD	SLE	F	30	White, 30, NH, F	White	Non-Hispanic/Latino	active	neg	8		no	no	arthritis, serositis	Nonerosive arthritis, Serositis	Cardioresp B; MS:B	moderate	MCS	MS	MS:B, cardioresp:B	B	prednisone 10 mg/day	steroid	y	n	n	n	n	n	n	n	n	n	n	n	n	n	14	2015-05-05
50	S3006	S3006a	SLE-SAN-006a (S3006a)	1	SLE83	SAN	SLE	F	46	White, 46, NH, F	White	Non-Hispanic/Latino	active	neg	6	Flare; Arthritis-4	yes		ANA+,	nonerosive arthritis		moderate	MCS	MS			Plaquenil (200mg/bid)	no steroid	n	n	n	n	n	n	n	n	n	n	n	y	n	n	NA	2015-09-14
51	S1085	S1085a	SLE-UCSD-1085a	1	SLE85	UCSD	SLE	F	50	White, 50, NH, F	White	Non-Hispanic/Latino	active	neg	6	Mild Flare	yes	mild	Nonerosive arthritis	Nonerosive arthritis	MS:B	moderate	MCS	MS	MS B	B	HCQ (400 mg/daily)	no steroid	n	n	n	y	n	n	n	n	n	n	n	n	n	n	0	2015-09-16
52	S1027	S1027b	SLE-UCSD-1027b	1	SLE12	UCSD	SLE	F	44	White, 44, NH, F	White	Non-Hispanic/Latino	active	neg	2		no	no	mucosal ulcers	Mucosal ulcers	MS:C	mild	MCS	MCS	MS:C	C	MMF	no steroid	n	n	n	n	n	n	n	n	n	n	n	n	y	n	9	2014-10-16
53	S1057	S1057b	SLE-UCSD-1057b	2	SLE19	UCSD	SLE	F	40	Asian, 40, NH, F	Asian	Non-Hispanic/Latino	active	neg	2	Aria sort	no	no	malar rash, mucosal ulcers, photosensitivity	Malar Rash, Photosensitivity, Mucosal ulcers	MC:C, MS:C	mild	MCS	MCS	MC:C, MS:C	C	pred (50 mg)	steroid	y	n	n	n	n	n	n	n	n	n	n	n	n	n	0	2015-01-13
54	S1067	S1067a	SLE-UCSD-1067a	1	SLE33	UCSD	SLE	F	63	White, 63, NH, F	White	Non-Hispanic/Latino	active	neg	2		no	no	discoid rash/cutaneous lesion	Discoid rash, cutaneous lesions	MS:C; MC:B	mild	MCS	MCS	MC:B, MS:C	B	Azathrioprine 100 mg/d; plaquenil 400 mg/day	no steroid	n	n	n	n	n	y	n	n	n	n	n	y	n	n	15	2015-04-21
55	S1061	S1061b	SLE-UCSD-1061b	2	SLE34	UCSD	SLE	F	46	Asian, 46, NH, F	Asian	Non-Hispanic/Latino	active	neg	4		no	no	malar rash, mucosal ulcers, photosensitivity	Malar Rash, Photosensitivity, Mucosal ulcers	MS:C; MC:B	mild	MCS	MCS	MC:B, MS:C	B	naprosyn 220 mg prn	no steroid	n	n	n	n	n	n	n	n	n	n	n	n	n	y	1	2015-05-05
56	S1057	S1057c	SLE-UCSD-1057c	3	SLE41	UCSD	SLE	F	40	Asian, 40, NH, F	Asian	Non-Hispanic/Latino	active	neg	4		no	no	malar rash, mucosal ulcers, photosensitivity	Malar Rash, Photosensitivity, Mucosal ulcers	MC:B, MS:B	mild	MCS	MCS	MC:B. MS:B	B	MTX 12.5 mg/week; prednisone 20mg/day	steroid	y	n	n	n	n	n	n	n	y	n	n	n	n	n	0	2015-05-12
57	S1061	S1061c	SLE-UCSD-1061c	3	SLE53	UCSD	SLE	F	46	Asian, 46, NH, F	Asian	Non-Hispanic/Latino	active	neg	4		no	no	malar rash, mucosal ulcer, photosensitivity	Malar Rash, Photosensitivity, Mucosal ulcers	MC:B; MS:C	mild	MCS	MCS	MC:B, MS:C	B	none	no steroid	n	n	n	n	n	n	n	n	n	n	n	n	n	n	1	2015-06-02
58	S1067	S1067b	SLE-UCSD-1067b	2	SLE54	UCSD	SLE	F	63	White, 63, NH, F	White	Non-Hispanic/Latino	active	neg	2		no	no	arthritis	Nonerosive arthritis	MC:C, MS:C	mild	MCS	MCS	MC:C, MS:C	C	imuran (50 mg/bid), HC4 (200 mg/bid), Relafen (1000mg/bid)	steroid	n	n	y	n	n	y	n	n	n	y	n	n	n	n	15	2015-06-23
59	S1045	S1045d	SLE-UCSD-1045d	1	SLE35	UCSD	SLE	F	40	Black, 40, NH, F	Black	Non-Hispanic/Latino	active	neg	6		no	no	mucosal ulcer, arthritis	Mucosal ulcers, Nonerosive arthritis	MS:A, MS:C	moderate	MCS	MCS	MS:A, MC:C (need to clarify)	A	plaquenil 400 mg/day	no steroid	n	n	n	n	n	n	n	n	n	n	n	y	n	n	6	2015-04-21
60	S1018	S1018c	SLE-UCSD-1018c	2	SLE46	UCSD	SLE	F	44	White, 44, Hispanic, F	White	Hispanic/Latino	active	neg	6		no	no	arthritis	Nonerosive arthritis	MC:B, MS:B	moderate	MCS	MCS	MC:B, MS:B	B	plaquenil 400 mg/day	no steroid	n	n	n	n	n	n	n	n	n	n	n	y	n	n	25	2015-05-19
61	S1023	S1023d	SLE-UCSD-1023d	2	SLE64	UCSD	SLE	F	36	Hispanic, 36, F	White	Hispanic/Latino	active	neg	8		yes	mild	serositis, dsDNA,mild flare	Serositis, Positive ds-DNA	MC:B; CV:B; MS:C	moderate	MCS	MCS	MC:B, W:B, MS:C	B	plavix, coumadin, prednisone (12 mg)	steroid	y	n	n	n	n	n	n	n	n	n	n	n	n	y	10	2015-07-22
62	S1087	S1087a	SLE-UCSD-1087a	1	SLE87	UCSD	SLE	F	48	Hispanic, 48, F	White	Non-Hispanic/Latino	active	neg	6		no	no	Discoid rash, cutaneous lesions, nonerosive arthritis	Discoid rash, nonerosive arthritis	MS:B, MC:B	moderate	MCS	MCS	MS:B; MC:B	B	methotrexate (7.5mg/week), HC4 (400mg/day)	steroid	n	n	y	n	n	n	n	n	y	n	n	n	n	n	6	2015-09-16
63	S1071	S1071a	SLE-UCSD-1071a	1	SLE52	UCSD	SLE	F	37	White, 37, Hispanic, F	White	Hispanic/Latino	active	neg	10				malar rash, arthritis, serositis, photosensitivity	malar rash, arthritis, serositis, photosensitivity	Cardiopul:B, MC:B, MS:B	severe	MCS	MCS	Cardiopul:B, MC:B, MS:B	B	none	no steroid	n	n	n	n	n	n	n	n	n	n	n	n	n	n	0	2015-06-02
64	S1053	S1053a	SLE-UCSD-1053a	1	SLE03	UCSD	SLE	F	33	White, 33, NH, F	White	Non-Hispanic/Latino	active	neg	4	mild flare	no	mild	malar rash, discoid/cutaneous rash	Malar Rash, Discoid rash, cutaneous lesions	MC:B	mild	MCS	MC	MC:B	B	plaq	no steroid	n	n	n	n	n	n	n	n	n	n	n	y	n	n	0	2014-09-25
65	S1056	S1056a	SLE-UCSD-1056a	1	SLE08	UCSD	SLE	F	53	White, 53, NH, F	White	Non-Hispanic/Latino	active	neg	4	FLARE, mild	yes	mild	malar rash	Malar Rash	MC:B	mild	MCS	MC	MC:B	B	plaq, MMF	no steroid	n	n	n	n	n	n	n	n	n	n	n	y	y	n	18	2014-10-07
66	S1061	S1061a	SLE-UCSD-1061a	1	SLE25	UCSD	SLE	F	45	Asian, 45, NH, F	Asian	Non-Hispanic/Latino	active	neg	2		no	no	mucosal ulcers, photosensitivity	Photosensitivity, Mucosal ulcers	MC:B	mild	MCS	MC	MC:B	B	none listed	no steroid	n	n	n	n	n	n	n	n	n	n	n	n	n	n	0	2015-02-26
67	S2019	S2019a	SLE-UCSD-2019a	1	SLE62	UCSD	SLE	F	32	Mixed, 32, F	Other	Non-Hispanic/Latino	active	neg	4		no	no	discoid rash	Discoid rash, cutaneous lesions	MC:B	mild	MCS	MC	MC:B	B	HCG (400 mg)	no steroid	n	n	n	y?	n	n	n	n	n	n	n	n	n	n	1	2015-07-29
68	S1053	S1053d	SLE-UCSD-1053d	4	SLE93	UCSD	SLE	F	34	White, 34, NH, F	White	Non-Hispanic/Latino	active	neg	4		no	no	Discoid rash,cutaneous lesions	Discoid rash, cutaneous lesions	MC:B	mild	MCS	MC	MC:B	B	HCQ (400 mg)	no steroid	n	n	n	y	n	n	n	n	n	n	n	n	n	n	1	2015-08-04
69	S1071	S1071b	SLE-UCSD-1071b	2	SLE80	UCSD	SLE	F	38	Hispanic, 38, F	White	Hispanic/Latino	active	neg	2		no	no	Photosensitivity	Photosensitivity	MC:C	mild	MCS	MC	MC C	C	none	no steroid	n	n	n	n	n	n	n	n	n	n	n	n	n	n	18	2015-09-01
70	S3009	S3009a	SLE-SAN-009a	1	SLE91	SAN	SLE	F	46	White, 46, NH, F	White	Non-Hispanic/Latino	active	neg	2	Flare; Rash-2	yes		ANA+, Malar Rash, Photosensitivity Raynaud's	malar rash		mild	MCS	MC			Plaquenil (200mg/QD), Steroid Cream/PRN	steroid	n	n	n	n	n	n	n	n	n	n	n	y	n	y	NA	2015-09-23
71	S1053	S1053b	SLE-UCSD-1053b	2	SLE09	UCSD	SLE	F	33	White, 33, NH, F	White	Non-Hispanic/Latino	active	neg	6	FLARE, moderate	yes	moderate	malar rash, discoid/cutaneous rash, photosensitivity, mucosal ulcer	Malar Rash, Discoid rash, cutaneous lesions, Photosensitivity, Mucosal ulcers	MC:B	moderate	MCS	MC	MC:B	B	plaq	no steroid	n	n	n	n	n	n	n	n	n	n	n	y	n	n	0	2014-10-07
72	S1053	S1053c	SLE-UCSD-1053c	3	SLE48	UCSD	SLE	F	34	White, 34, NH, F	White	Non-Hispanic/Latino	active	neg	6		no	no	malar rash, low C', photosensitivity	Malar Rash, Photosensitivity, Low complement	MC:B	moderate	MCS	MC	MC:B	B	plaquenil 400 mg/day	no steroid	n	n	n	n	n	n	n	n	n	n	n	y	n	n	1	2015-05-26
73	S2013	S2013a	SLE-UCSD-2013a	1	SLE16	UCSD	SLE	F	38	not listed, Hispanic, 38, F	not listed	Hispanic/Latino	inactive	neg	0		no	no	none		Renal D	mild	R	R	Renal D	D	pred, plaq, MMF, Benlysta, warfarin	steroid	y	n	n	n	n	n	y	n	n	n	y	y	y	n	18	2014-11-12
74	S1023	S1023c	SLE-UCSD-1023c	1	SLE31	UCSD	SLE	F	36	White, 36, Hispanic, F	White	Hispanic/Latino	inactive	neg	2		no	no	dsDNA	Positive ds-DNA	MS:C, Renal D	mild	R	R	MS:C, Renal D	D (MCS C)	Azathrioprine 100 mg/d; plaquenil 400 mg/day; prednisone 15mg/day	steroid	y	n	n	n	n	y	n	n	n	n	n	y	n	n	10	2015-04-07
75	S2016	S2016a	SLE-UCSD-2016a	1	SLE38	UCSD	SLE	F	51	White, 51, Hispanic, F	White	Hispanic/Latino	inactive	neg	0		no	no	none; history of renal	none, History of Renal	Renal D, CNS D	mild	R	R	Renal D; CNS:D	D	plaquenil 400 mg/day	no steroid	n	n	n	n	n	n	n	n	n	n	n	y	n	n	20	2015-04-30
76	S2001	S2001e	SLE-UCSD-2001e	1	SLE51	UCSD	SLE	F	54	White, 54, NH, F	White	Non-Hispanic/Latino	inactive	neg	n/a		no	no	none		Renal:C	mild	R	R	Renal:C	C	MMF 1g/bid, Xarelto	no steroid	n	n	n	n	n	n	n	n	n	n	n	n	y	y	8	2015-05-27
77	S2011	S2011d	SLE-UCSD-2011d	2	SLE49	UCSD	SLE	F	54	Black, 54, NH, F	Black	Non-Hispanic/Latino	inactive	neg	2		no	no	low C'	Low complement	Renal D	mild	R	R	Renal:D	D	MMF 500 mg/BID; prednisone 2mg/day; HC4 400 mg/day	steroid	y	n	y	n	n	n	n	n	n	n	n	n	y	n	10	2015-05-27
78	S2015	S2015a	SLE-UCSD-2015a	1	SLE30	UCSD	SLE	F	25	White, 25, Hispanic, F	White	Hispanic/Latino	inactive	neg	0		no	no	none		Neuropsych D	mild	N	N	Neuropsych:D	D	MMF 500mg/day; prednisone 4mg/day; plaquenil 400mg/day	steroid	y	n	n	n	n	n	n	n	n	n	n	y	y	n	11	2015-04-01
79	S1058	S1058a	SLE-UCSD-1058a	1	SLE13	UCSD	SLE	F	63	White, 63, NH, F	White	Non-Hispanic/Latino	inactive	neg	0		no	no	none		MS:C	mild	MCS	MS	MS:C	C	plaq	no steroid	n	n	n	n	n	n	n	n	n	n	n	y	n	n	1	2014-10-21
80	S1069	S1069a	SLE-UCSD-1069a	1	SLE47	UCSD	SLE	F	21	White, 21, NH, F	White	Non-Hispanic/Latino	inactive	neg	0		no	no	none		MS:C	mild	MCS	MS	MS:C	C	none	no steroid	n	n	n	n	n	n	n	n	n	n	n	n	n	n	6	2015-05-21
81	S1027	S1027c	SLE-UCSD-1027c	2	SLE72	UCSD	SLE	F	45	White, 45, NH, F	White	Non-Hispanic/Latino	inactive	neg	2		no	no	mucosal ulcers	Mucosal ulcers	MC:C	mild	MCS	MC	MC-C	C	MMF 3g, IVIG	no steroid	n	n	n	n	n	n	n	n	n	n	n	n	y	y	10	2015-08-06
82	S1059	S1059a	SLE-UCSD-1059a	1	SLE14	UCSD	SLE	F	35	White, 35, NH, F	White	Non-Hispanic/Latino	inactive	neg	0		no	no	none		0	mild	0	0	0		medrol, MMF	steroid	n	y	n	n	n	n	n	n	n	n	n	n	y	n	11	2014-10-28
83	S1057	S1057d	SLE-UCSD-1057d	4	SLE75	UCSD	SLE	F	41	Asian, 41, NH, F	Asian	Non-Hispanic/Latino	inactive	neg	0		no	no	none		0	mild	0	0				no steroid	n	n	n	n	n	n	n	n	n	n	n	n	n	n	1	2015-07-30
84	S1067	S1067c	SLE-UCSD-1067c	3	SLE79	UCSD	SLE	F	63	White, 63, NH, F	White	Non-Hispanic/Latino	inactive	neg	0		no	no	None	none	0	mild	0	0	0		imuran (100 mg), HCQ (400mg), relafen (1g/bid)	no steroid	n	n	n	y	n	y	n	n	n	y	n	n	n	n	15	2015-09-01
85	S1046	S1046b	SLE-UCSD-1046b	1	SLE01	UCSD	SLE	F	83	White, 83, NH, F	White	Non-Hispanic/Latino	inactive	neg	0		no	no	none		0	mild	0	0	0		prednisone	steroid	y	n	n	n	n	n	n	n	n	n	n	n	n	n	23	2014-09-18
86	S2011	S2011c	SLE-UCSD-2011c	1	SLE02	UCSD	SLE	F	53	Black, 53, NH, F	Black	Non-Hispanic/Latino	inactive	neg	0		no	no	none		0	mild	0	0	0		plaquenil, pred, MMF	steroid	y	n	n	n	n	n	n	n	n	n	n	y	y	n	9	2014-09-24
87	S1044	S1044c	SLE-UCSD-1044c	1	SLE07	UCSD	SLE	F	53	White, 53, NH, F	White	Non-Hispanic/Latino	inactive	neg	0		no	no	none		0	mild	0	0	0		plaq	no steroid	n	n	n	n	n	n	n	n	n	n	n	y	n	n	20	2014-10-02
88	S1031	S1031c	SLE-UCSD-1031c	1	SLE15	UCSD	SLE	F	39	White, 39, NH, F	White	Non-Hispanic/Latino	inactive	neg	2		no	no	dsDNA	Positive ds-DNA	0	mild	0	0	0		none listed	no steroid	n	n	n	n	n	n	n	n	n	n	n	n	n	n	22	2014-10-30
89	S1031	S1031d	SLE-UCSD-1031d	2	SLE22	UCSD	SLE	F	39	White, 39, NH, F	White	Non-Hispanic/Latino	inactive	neg	2		no	no	none		No As or Bs	mild	0	0	none		none listed	no steroid	n	n	n	n	n	n	n	n	n	n	n	n	n	n	22	2015-02-17
90	S1063	S1063a	SLE-UCSD-1063a	1	SLE27	UCSD	SLE	F	69	Pacific Islander, 69, NH, F	Other, Pacific Islander	Non-Hispanic/Latino	inactive	neg	0		no	no	none		No As or Bs	mild	0	0	no A or B		HC4 400 mg/day; tracleer 125 mg/bid; ihnaled iloprost 4times/day; Adcirca 40 mg/day	steroid	n	n	y	n	n	n	n	n	n	n	n	n	n	y	11	2015-03-05
91	S1064	S1064a	SLE-UCSD-1064a	1	SLE28	UCSD	SLE	F	56	White, 56, NH, F	White	Non-Hispanic/Latino	inactive	neg	0		no	no	need to clarify with Ken		No As or Bs	mild	0	0	no A or B		plaquenil 400 mg/day; Arava 20mg/day	no steroid	n	n	n	n	y	n	n	n	n	n	n	y	n	n	13	2015-03-17
92	S1078	S1078a	SLE-UCSD-1078a	1	SLE67	UCSD	SLE	F	54	White, 54, NH, F	White	Non-Hispanic/Latino	inactive	neg	0		no	no	none		0	mild	0	0	0		HCQ (400 mg)	no steroid	n	n	n	y	n	n	n	n	n	n	n	n	n	n	3	2015-08-04
93	S1064	S1064b	SLE-UCSD-1064b	2	SLE82	UCSD	SLE	F	56	White, 56, NH, F	White	Non-Hispanic/Latino	inactive	neg	0		no	no			No As or Bs	mild	0	0	No As or Bs		plaquenil (400mg/day), leflunomide (20mg/day)	no steroid	n	n	n	n	y	n	n	n	n	n	n	y	n	n	13	2015-09-08
94	T4918	T4918	T4918	1	HC07	Scripps	HC	F	35	White, 35, NH, F	White	Non Hispanic	NA	NA	NA	NA			NA			healthy	HC	HC	NA	NA	NA	NA	n	n	n	n	n	n	n	n	n	n	n	n	n	n	NA	2014-11-17
95	T5663	T5663	T5663	1	HC08	Scripps	HC	F	35	White, 35, NH, F	White	Non Hispanic	NA	NA	NA	NA			NA			healthy	HC	HC	NA	NA	NA	NA	n	n	n	n	n	n	n	n	n	n	n	n	n	n	NA	2014-11-17
96	T4867	T4867	T4867	1	HC09	Scripps	HC	F	35	White, 35, NH, F	White	Non Hispanic	NA	NA	NA	NA			NA			healthy	HC	HC	NA	NA	NA	NA	n	n	n	n	n	n	n	n	n	n	n	n	n	n	NA	2014-11-19
97	T5210	T5210	T5210	1	HC11	Scripps	HC	F	37	White, 37, NH, F	White	Non Hispanic	NA	NA	NA	NA			NA			healthy	HC	HC	NA	NA	NA	NA	n	n	n	n	n	n	n	n	n	n	n	n	n	n	NA	2014-12-04
98	T5863	T5863	T5683	1	HC12	Scripps	HC	F	37	Asian, 37, NH, F	Asian	Non Hispanic	NA	NA	NA	NA			NA			healthy	HC	HC	NA	NA	NA	NA	n	n	n	n	n	n	n	n	n	n	n	n	n	n	NA	2015-01-07
99	L0147	L0147	L0147	1	HC01	LJI	HC	F	39	39, F	not listed	Not available	NA	NA	NA	NA			NA			healthy	HC	HC	NA	NA	NA	NA	n	n	n	n	n	n	n	n	n	n	n	n	n	n	NA
100	L0142	L0142	L0142	1	HC02	LJI	HC	F	33	33, F	not listed	Not available	NA	NA	NA	NA			NA			healthy	HC	HC	NA	NA	NA	NA	n	n	n	n	n	n	n	n	n	n	n	n	n	n	NA
101	L0150	L0150	L0150	1	HC03	LJI	HC	F	54	54, F	not listed	Not available	NA	NA	NA	NA			NA			healthy	HC	HC	NA	NA	NA	NA	n	n	n	n	n	n	n	n	n	n	n	n	n	n	NA
102	L0038	L0038	L0038	1	HC04	LJI	HC	F	33	33, F	not listed	Not available	NA	NA	NA	NA			NA			healthy	HC	HC	NA	NA	NA	NA	n	n	n	n	n	n	n	n	n	n	n	n	n	n	NA
103	L0088	L0088	L0088	1	HC05	LJI	HC	F	41	41, F	not listed	Not available	NA	NA	NA	NA			NA			healthy	HC	HC	NA	NA	NA	NA	n	n	n	n	n	n	n	n	n	n	n	n	n	n	NA
104	L0140	L0140	L0140	1	HC06	LJI	HC	F	32	32, F	not listed	Not available	NA	NA	NA	NA			NA			healthy	HC	HC	NA	NA	NA	NA	n	n	n	n	n	n	n	n	n	n	n	n	n	n	NA
105	L10014	L10014_fresh	L10014_fresh	1	HC13	LJI	HC	F	31	31, F	not listed	Not available	NA	NA	NA	NA			NA			healthy	HC	HC	NA	NA	NA	NA	n	n	n	n	n	n	n	n	n	n	n	n	n	n	NA
106	L0088	L0088_fresh	L0088_fresh	2	HC15	LJI	HC	F	41	Repeat	not listed	Not available	NA	NA	NA	NA			NA			healthy	HC	HC	NA	NA	NA	NA	n	n	n	n	n	n	n	n	n	n	n	n	n	n	NA
107	T5502	T5502	T5502	1	HC16	Scripps	HC	F	58	White, 58, NH, F	White	Non Hispanic	NA	NA	NA	NA			NA			healthy	HC	HC	NA	NA	NA	NA	n	n	n	n	n	n	n	n	n	n	n	n	n	n	NA
108	T5599	T5599	T5599	1	HC17	Scripps	HC	F	50	White, 50, Hispanic, F	White	Hispanic	NA	NA	NA	NA			NA			healthy	HC	HC	NA	NA	NA	NA	n	n	n	n	n	n	n	n	n	n	n	n	n	n	NA
109	T5695	TS695	TS695	1	HC18	Scripps	HC	F	36	White, 36, Hispanic, F	White	Hispanic	NA	NA	NA	NA			NA			healthy	HC	HC	NA	NA	NA	NA	n	n	n	n	n	n	n	n	n	n	n	n	n	n	NA
110	T5375	T5375	T5375	1	HC19	Scripps	HC	F	38	NR, 38, F	not listed	not listed	NA	NA	NA	NA			NA			healthy	HC	HC	NA	NA	NA	NA	n	n	n	n	n	n	n	n	n	n	n	n	n	n	NA
111	T5777	T5777	T5777	1	HC20	Scripps	HC	F	31	Black, 31, NH, F	Black	Non Hispanic	NA	NA	NA	NA			NA			healthy	HC	HC	NA	NA	NA	NA	n	n	n	n	n	n	n	n	n	n	n	n	n	n	NA
112	T5466	T5466	T5466	1	HC22	Scripps	HC	F	24	Mixed, 24, Hispanic, F	Other, multiple	Hispanic	NA	NA	NA	NA			NA			healthy	HC	HC	NA	NA	NA	NA	n	n	n	n	n	n	n	n	n	n	n	n	n	n	NA
113	T5755	T5755	T5755	1	HC23	Scripps	HC	F	45	Asian, 45, NH, F	Asian	Non Hispanic	NA	NA	NA	NA			NA			healthy	HC	HC	NA	NA	NA	NA	n	n	n	n	n	n	n	n	n	n	n	n	n	n	NA
114	T5790	T5790	T5790	1	HC24	Scripps	HC	F	47	White, 47, NH, F	White	Non Hispanic	NA	NA	NA	NA			NA			healthy	HC	HC	NA	NA	NA	NA	n	n	n	n	n	n	n	n	n	n	n	n	n	n	NA
115	T5710	T5710	T5710	1	HC25	Scripps	HC	F	26	White, 26, NH, F	White	Non Hispanic	NA	NA	NA	NA			NA			healthy	HC	HC	NA	NA	NA	NA	n	n	n	n	n	n	n	n	n	n	n	n	n	n	NA
116	T5257	T5257	T5257	1	HC27	Scripps	HC	F	60	White, 60, NH, F	White	Non Hispanic	NA	NA	NA	NA			NA			healthy	HC	HC	NA	NA	NA	NA	n	n	n	n	n	n	n	n	n	n	n	n	n	n	NA
117	T5695	T5695 (TS695 redraw)	T5695 (TS695 redraw)	2	HC28	Scripps	HC	F		Repeat	White	Hispanic	NA	NA	NA	NA			NA			healthy	HC	HC	NA	NA	NA	NA	n	n	n	n	n	n	n	n	n	n	n	n	n	n	NA
118	T5246	T5246	T5246	1	HC29	Scripps	HC	F	32	White, 32, NH, F	White	Non Hispanic	NA	NA	NA	NA			NA			healthy	HC	HC	NA	NA	NA	NA	n	n	n	n	n	n	n	n	n	n	n	n	n	n	NA
119	T4631	T4631	T4631	1	HC31	Scripps	HC	F	52	Black, 52, NH, F	Black	Non Hispanic	NA	NA	NA	NA			NA			healthy	HC	HC	NA	NA	NA	NA	n	n	n	n	n	n	n	n	n	n	n	n	n	n	NA
