# Supplementary material for: Multi–cell type gene coexpression network analysis reveals coordinated interferon response and cross–cell type correlations in systemic lupus erythematosus
Source: HighWire-hosted journal article supplement (doi:10.1101/gr.265249.120), 2021-03-05
Supplement: Supplemental_Table_S2.xlsx [file Supplemental_Table_S2.xlsx]

## Sheet: cMo-SLE-vs-HC
Supplemental Table S2. The differential gene expression analysis result (DESeq2 output) between SLE and HC from first study visit data of classical monocytes (related to Figure 1B; Figure 1C).
GENE	baseMean	log2FoldChange	lfcMLE	lfcSE	stat	pvalue	padj
MTCO1P40	708.171	-0.953057	-1.51148	0.141669	-6.72734	1.72797e-11	2.41328e-07
NCOA7	717.29	0.804678	1.36509	0.141643	5.68101	1.33898e-08	9.35009e-05
IFITM1	2882.07	0.741209	2.0308	0.143581	5.16232	2.43911e-07	0.00113549
CCR1	1984.83	0.571241	0.712048	0.115008	4.96697	6.8007e-07	0.00149234
IFITM2	6278.19	0.536806	0.646454	0.108479	4.94847	7.47986e-07	0.00149234
OASL	1378.13	0.721754	1.66085	0.145208	4.97048	6.67878e-07	0.00149234
SPATS2L	223.727	0.722464	1.45258	0.145122	4.97833	6.41354e-07	0.00149234
IFITM3	10720.6	0.714265	1.55752	0.145367	4.91352	8.94578e-07	0.00156171
HELZ2	195.314	0.664649	1.02948	0.137776	4.82413	1.40616e-06	0.00164522
ISG15	3090.61	0.699746	1.65769	0.145005	4.82566	1.39539e-06	0.00164522
LGALS3BP	1323.06	0.677299	2.3024	0.1397	4.84823	1.24569e-06	0.00164522
RP11-396M11.1	312.012	0.544631	0.672294	0.113297	4.80709	1.53142e-06	0.00164522
RP4-725G10.3	110.881	0.701039	1.52885	0.145366	4.82258	1.41711e-06	0.00164522
CEP85L	722.919	-0.436931	-0.491798	0.0918349	-4.75778	1.95729e-06	0.00170847
IFI44L	3345.63	0.656707	2.43408	0.137872	4.76316	1.90586e-06	0.00170847
IFITM9P	72.8037	0.63495	0.916575	0.132882	4.77831	1.76777e-06	0.00170847
IFI6	8220.07	0.681357	1.82113	0.14368	4.74217	2.11443e-06	0.00173707
NCMAP	35.4991	0.398602	0.439738	0.0845073	4.71677	2.39614e-06	0.00177931
RSAD2	1264.81	0.658506	2.20619	0.13979	4.7107	2.4687e-06	0.00177931
ZBP1	163.938	0.683469	1.40851	0.145288	4.70425	2.54806e-06	0.00177931
SIGLEC1	1648.56	0.644943	2.38737	0.137752	4.68193	2.84185e-06	0.00188997
LY6E	7189.17	0.675918	1.63699	0.144788	4.66832	3.03677e-06	0.00192779
MAFB	3330.93	0.535607	0.669122	0.115443	4.63959	3.49101e-06	0.0021198
SERPING1	1277.36	0.65824	1.67396	0.144239	4.56355	5.0296e-06	0.00292681
RNF213	2232.9	0.525707	0.658317	0.115864	4.53729	5.69825e-06	0.00318327
OAS2	2263.59	0.648328	1.16963	0.143676	4.51242	6.40921e-06	0.00344273
NIP7	238.573	0.466691	0.550048	0.103774	4.49719	6.88572e-06	0.00353971
SLC31A2	3455.15	0.438259	0.504093	0.097591	4.49077	7.09666e-06	0.00353971
SOX4	558.436	-0.468587	-0.552887	0.10499	-4.46318	8.07523e-06	0.00388892
MT2A	710.897	0.599611	0.904862	0.1363	4.39921	1.08646e-05	0.00489466
OAS3	2908.36	0.64038	1.37071	0.145372	4.4051	1.05733e-05	0.00489466
SAMD9L	1241.9	0.623873	1.09604	0.143066	4.36074	1.29624e-05	0.00565728
EIF2AK2	1405.2	0.596892	0.914433	0.13727	4.3483	1.37199e-05	0.00580644
BST2	2179.78	0.429363	0.496889	0.0992414	4.32645	1.51533e-05	0.00622445
IGF2R	539.911	0.3818	0.426356	0.0886916	4.30481	1.67131e-05	0.00666901
EPSTI1	1170.81	0.624108	1.34577	0.145366	4.29336	1.75991e-05	0.00681437
IFI44	1557.28	0.62295	1.38555	0.145288	4.2877	1.80533e-05	0.00681437
CECR1	4731.66	0.35288	0.387912	0.083145	4.24415	2.19422e-05	0.00766009
DHX58	395.801	0.583301	0.898314	0.137615	4.23864	2.24877e-05	0.00766009
HMGB1	4501.62	-0.148324	-0.150532	0.0349544	-4.24336	2.20198e-05	0.00766009
ISG20	310.52	0.590529	0.936872	0.139238	4.24114	2.2239e-05	0.00766009
CMPK2	1948.67	0.609424	1.4687	0.144712	4.21129	2.53914e-05	0.00793514
DUSP6	7176.11	0.452881	0.543745	0.107944	4.19553	2.72231e-05	0.00793514
IFIT3	2987.52	0.599139	1.73764	0.14201	4.21899	2.454e-05	0.00793514
IRF7	2855.41	0.583616	0.907747	0.138193	4.22318	2.40877e-05	0.00793514
NEXN	193.077	0.609669	1.2593	0.145328	4.19512	2.72724e-05	0.00793514
RP11-823E8.3	75.3196	0.498318	0.634313	0.118597	4.20178	2.64825e-05	0.00793514
TRIM14	1053.69	0.492634	0.621957	0.117271	4.20083	2.6594e-05	0.00793514
DNAJB9	539.118	-0.463929	-0.561721	0.110785	-4.18767	2.81831e-05	0.00803276
IFIT1B	20.8237	0.566571	2.16882	0.136067	4.16392	3.12829e-05	0.00873795
SHISA5	6317.45	0.421183	0.491249	0.101265	4.15921	3.19354e-05	0.0087453
KIAA1958	542.815	0.579661	0.926459	0.13963	4.15139	3.30456e-05	0.00887528
ETV7	159.006	0.564078	2.02596	0.137386	4.10579	4.0293e-05	0.0106176
KLHDC7B	239.852	0.591962	1.11184	0.144507	4.09643	4.19578e-05	0.0108515
USP18	485.047	0.538655	2.4075	0.13219	4.07485	4.60431e-05	0.0116916
APEX1	664.761	-0.297875	-0.319619	0.0733209	-4.06262	4.85249e-05	0.0121018
EIF1B	802.654	0.304089	0.327748	0.0751237	4.04784	5.16933e-05	0.0123666
IFI35	1449.47	0.506192	0.675468	0.125129	4.04536	5.22432e-05	0.0123666
IFIH1	633.598	0.559245	0.868607	0.138162	4.04774	5.17151e-05	0.0123666
RNASE1	139.671	0.579995	1.5192	0.143606	4.03879	5.37273e-05	0.0125059
EMP1	139.692	0.58063	1.45312	0.144231	4.02569	5.68096e-05	0.0126307
HERC5	611.401	0.582738	1.38763	0.14478	4.025	5.69765e-05	0.0126307
OAS1	4250.25	0.531809	0.758102	0.132037	4.02771	5.63217e-05	0.0126307
RUBCN	1296.5	0.281635	0.30036	0.0702012	4.01183	6.02498e-05	0.0131476
AXL	48.6227	0.578244	1.40476	0.144572	3.99969	6.34265e-05	0.013591
CCL2	170.724	0.529059	2.31939	0.132427	3.9951	6.4666e-05	0.013591
USP41	86.771	0.52664	2.36114	0.131886	3.99315	6.5201e-05	0.013591
PTGER2	2026.17	0.449905	0.554703	0.113215	3.97391	7.07019e-05	0.0145209
LRAT	24.1601	0.412963	0.487426	0.104039	3.96931	7.20799e-05	0.0145894
MX1	4371	0.56766	1.32632	0.144927	3.91688	8.97026e-05	0.0172942
RP11-467L13.5	318.853	0.552426	1.66526	0.140983	3.9184	8.91393e-05	0.0172942
SHOX	48.9673	0.270678	0.288023	0.0690464	3.92023	8.84639e-05	0.0172942
ZNFX1	1008.09	0.373399	0.426037	0.0953759	3.91502	9.03964e-05	0.0172942
IFIT1	1425.69	0.548603	1.69524	0.14045	3.90603	9.38248e-05	0.0177075
GMPR	196.087	0.529598	1.99781	0.135845	3.89855	9.6772e-05	0.0178499
RAB1A	1553.84	0.251987	0.265912	0.0647037	3.89447	9.84134e-05	0.0178499
SAMD9	784.424	0.527378	0.783996	0.135412	3.89463	9.83507e-05	0.0178499
RRM2	16.9351	0.426628	0.517513	0.110038	3.87711	0.000105704	0.0189265
GBP1	1137.1	0.553682	1.04549	0.144634	3.82817	0.000129097	0.0228224
RBKS	57.9544	-0.550381	-0.94399	0.14397	-3.8229	0.000131893	0.0230253
RN7SL368P	32.2973	-0.554102	-1.02496	0.1452	-3.81613	0.00013556	0.0233733
DDX60L	1098.58	0.47673	0.637444	0.125431	3.80072	0.000144277	0.024304
PHF11	1079.77	0.386038	0.450758	0.101577	3.80044	0.000144439	0.024304
RASGEF1B	1012.49	0.475651	0.636978	0.125618	3.78647	0.000152801	0.0254049
MX2	2209.88	0.521097	0.802364	0.137734	3.78336	0.000154727	0.0254225
PLAC8	1204.49	0.532729	0.874331	0.140923	3.78027	0.000156656	0.0254401
CC2D1B	132.978	0.387286	0.454195	0.102658	3.77257	0.000161573	0.0256423
S100A11	17197.9	0.190073	0.196151	0.050356	3.77459	0.000160271	0.0256423
APOL6	916.67	0.462507	0.606433	0.122937	3.76213	0.00016847	0.0264365
GBP1P1	127.175	0.54343	1.03992	0.144818	3.7525	0.000175081	0.0271687
BLOC1S1	532.744	0.246953	0.261214	0.0659865	3.74248	0.000182213	0.0278183
OR2A1-AS1	21.5387	0.342096	0.385283	0.0915103	3.73833	0.000185243	0.0278183
RHOB	523.013	-0.504082	-0.725668	0.134761	-3.74055	0.000183616	0.0278183
SAMD4A	115.975	0.534006	0.937563	0.143194	3.72925	0.000192048	0.0285334
LDLR	265.798	0.510114	0.781201	0.137421	3.71204	0.000205595	0.0302246
FOSL2	1036.6	-0.281953	-0.304889	0.0767979	-3.67136	0.000241262	0.0350063
HSH2D	699.6	0.479077	0.672074	0.130654	3.66676	0.000245641	0.0350063
PIM1	1173.59	0.506479	0.783446	0.138033	3.66925	0.000243263	0.0350063
CYB5D2	143.047	-0.411936	-0.503618	0.112684	-3.65568	0.000256496	0.035201
DDX60	695.434	0.527025	0.967676	0.144214	3.65447	0.000257709	0.035201
IL1RN	1091.3	0.432432	0.54946	0.118391	3.65259	0.000259609	0.035201
PARP9	2917.58	0.5082	0.80068	0.139051	3.65478	0.000257407	0.035201
XAF1	572.701	0.516038	0.847658	0.140991	3.66007	0.000252144	0.035201
PML	848.853	0.466886	0.644401	0.12904	3.61814	0.000296732	0.0398476
APOBEC3B	525.918	0.523643	1.01326	0.144962	3.61227	0.000303527	0.0399911
DRAP1	987.104	0.28651	0.311852	0.0793077	3.61263	0.000303104	0.0399911
BLVRA	3274.37	0.374054	0.440619	0.103735	3.60585	0.000311129	0.0404377
FAM69A	69.9143	0.523157	1.03309	0.145138	3.60454	0.000312707	0.0404377
ADAP2	981.996	0.263252	0.282688	0.0734702	3.58311	0.000339534	0.043504
CDKN1B	189.183	-0.351467	-0.404341	0.0983098	-3.57509	0.000350102	0.0436565
PTPA	500.081	0.291156	0.318607	0.0814299	3.57554	0.000349507	0.0436565
TRIM22	4866.85	0.45896	0.628488	0.128216	3.57958	0.000344145	0.0436565
WDR74	231.473	-0.321066	-0.359912	0.0904425	-3.54995	0.000385308	0.0476213
APOBEC3A	5183.64	0.512581	0.962041	0.144595	3.54495	0.000392682	0.0476887
MOV10	288.309	0.48265	0.723753	0.136111	3.546	0.000391133	0.0476887
RBCK1	1482.61	0.308923	0.343515	0.0873003	3.53862	0.000402221	0.048426
FBXO6	696.863	0.364468	0.428693	0.10339	3.52516	0.00042322	0.0484483
LFNG	118.71	0.465826	0.662373	0.131942	3.53055	0.000414696	0.0484483
NAPA	1316.1	0.301943	0.334111	0.0855832	3.52806	0.000418617	0.0484483
PHACTR2	701.673	0.337429	0.385343	0.0956608	3.52735	0.000419747	0.0484483
U2	736.942	-0.498964	-0.798635	0.141527	-3.52558	0.000422549	0.0484483
ZNF784	55.7026	0.464812	0.65963	0.131717	3.52887	0.000417338	0.0484483
RP11-810P12.7	378.674	-0.453877	-0.617089	0.128984	-3.51885	0.00043342	0.0492125
MT2P1	25.2045	0.491963	0.79054	0.140023	3.51345	0.000442325	0.0494497
XX-FW83563B9.5	41.4175	-0.378387	-0.451849	0.107702	-3.51329	0.00044259	0.0494497
ADAR	3637.97	0.349957	0.405726	0.0997887	3.50698	0.000453226	0.0502362
SFXN3	1008.06	0.243926	0.259847	0.0696478	3.50228	0.000461293	0.0507277
BAZ2A	679.253	0.271256	0.293981	0.0775233	3.49903	0.000466952	0.0509488
NHLRC2	235.444	0.363177	0.428311	0.104035	3.4909	0.000481394	0.0521174
ADAMTS2	62.9998	0.400508	3.45431	0.114874	3.4865	0.000489384	0.0525749
OTUD7B	21.3849	0.339648	0.390413	0.0975268	3.48261	0.000496554	0.0529379
RP11-198M15.1	30.9952	0.383613	0.465708	0.110299	3.47794	0.000505292	0.0534615
PARP14	3226.48	0.457058	0.64778	0.131661	3.47149	0.000517588	0.0543507
TMEM70	514.742	-0.337142	-0.386425	0.0972602	-3.46639	0.000527499	0.0549779
IFIT2	3499.87	0.501642	1.12811	0.145137	3.45634	0.000547574	0.0557178
MRPL48	302.191	-0.287683	-0.316001	0.0831913	-3.45809	0.000544015	0.0557178
MS4A4A	461.218	0.474891	0.726161	0.137402	3.45621	0.000547823	0.0557178
RNU2-1	62.1722	-0.49286	-0.811137	0.142657	-3.45487	0.000550556	0.0557178
GSTP1	14201.6	-0.18467	-0.191387	0.0535301	-3.44984	0.000560921	0.0563584
TYMP	16558	0.388873	0.47833	0.112861	3.44559	0.000569815	0.0568431
TCN2	813.852	0.442628	0.610755	0.129058	3.42968	0.000604304	0.0598561
PARP10	777.633	0.389399	0.481604	0.113868	3.41976	0.000626768	0.061644
CTB-131B5.2	80.5611	0.362555	0.431782	0.106264	3.41183	0.000645276	0.0630205
C19orf66	494.473	0.361009	0.429358	0.105969	3.40673	0.000657467	0.0637652
CD302	1075.39	-0.232171	-0.246546	0.0681902	-3.40475	0.000662236	0.0637847
NKG7	141.288	0.475938	0.763573	0.140009	3.39934	0.000675492	0.0646159
MCCC1	348.082	-0.338759	-0.391773	0.099748	-3.39615	0.000683406	0.0649282
AC004893.11	41.5504	-0.377458	-0.458459	0.111321	-3.39071	0.000697126	0.0656725
RPL36AL	1805.16	0.167576	0.172731	0.0494569	3.38833	0.000703208	0.0656725
U3	97.2047	-0.469543	-0.712493	0.138611	-3.38749	0.000705346	0.0656725
GRN	28967.9	0.265027	0.287871	0.0784675	3.37753	0.000731394	0.0674471
PLSCR1	3446.71	0.409936	0.53129	0.121408	3.37653	0.000734066	0.0674471
GBP5	596.056	0.485578	0.877503	0.14396	3.37301	0.000743507	0.0678681
FCGR1CP	515.809	0.411864	0.537053	0.122266	3.36861	0.000755494	0.0685145
RP11-583F2.1	44.4811	0.353043	0.418201	0.105029	3.3614	0.000775491	0.0698743
FCGR1B	752.763	0.406128	0.524613	0.120935	3.35823	0.000784438	0.0702273
SPG21	4320.89	-0.152452	-0.156368	0.0454493	-3.35432	0.000795595	0.0707725
C16orf74	159.794	-0.398102	-0.503341	0.118788	-3.35137	0.000804132	0.0710333
FAM204A	1068.41	-0.196639	-0.205373	0.0587018	-3.3498	0.0008087	0.0710333
MYADM	1936.18	0.330556	0.381922	0.0989	3.34233	0.000830783	0.0725169
SLC25A5	4064.06	-0.199395	-0.208609	0.0597781	-3.33559	0.000851178	0.0738357
CLIC1P1	322.859	0.171307	0.177031	0.0514043	3.33254	0.00086057	0.0741896
OGG1	301.482	-0.34458	-0.404514	0.103624	-3.32528	0.000883305	0.0756825
DNASE2	1065.19	0.308839	0.349738	0.0931968	3.31384	0.00092025	0.0783671
ARL6IP5	6425.97	-0.155376	-0.159664	0.0470196	-3.30449	0.000951509	0.0802474
BBS9	121.967	0.458324	0.718412	0.138867	3.30045	0.000965313	0.0802474
CAPN2	4950.42	0.220197	0.233216	0.0666874	3.30193	0.000960218	0.0802474
ITGB7	214.402	0.424445	0.582678	0.128549	3.3018	0.000960649	0.0802474
HERC6	304.674	0.46335	0.754253	0.140705	3.29305	0.000991072	0.0819012
FNBP4	969.833	-0.174628	-0.180902	0.0532172	-3.28142	0.00103285	0.0826558
GSTO1	3439.81	0.198524	0.207956	0.0604548	3.28385	0.00102401	0.0826558
LPCAT4	115.306	0.362739	0.440347	0.110337	3.28757	0.00101056	0.0826558
NUAK2	951.03	-0.357294	-0.42906	0.10891	-3.28064	0.00103571	0.0826558
OSM	208.843	-0.462267	-1.16446	0.140714	-3.28515	0.0010193	0.0826558
RGS2	12380.5	-0.405423	-0.5283	0.123454	-3.284	0.00102344	0.0826558
CTSL	449.084	0.424904	0.593137	0.130276	3.26158	0.00110793	0.0879166
SNORD3C	56.8677	-0.462449	-0.749515	0.142021	-3.2562	0.00112916	0.0890948
TOR1B	603.31	0.420217	0.580925	0.129297	3.25001	0.001154	0.0905439
TCTN1	115.84	-0.387976	-0.492557	0.119444	-3.24818	0.00116145	0.0906187
CD244	1257.48	-0.276399	-0.30523	0.0851876	-3.2446	0.00117617	0.0907538
FBXL14	27.453	-0.470917	-0.968224	0.145091	-3.24567	0.00117176	0.0907538
BUD31	732.921	0.172496	0.178731	0.0533318	3.23439	0.00121903	0.0935439
CTC-429P9.1	39.2872	-0.402154	-0.528337	0.124557	-3.22867	0.00124367	0.0945814
MARCKS	1259.12	0.352484	0.425481	0.109192	3.22811	0.0012461	0.0945814
YTHDF3-AS1	17.9853	-0.463716	-0.791522	0.143761	-3.22561	0.00125702	0.0948951
ALOX12-AS1	109.382	-0.343108	-0.407925	0.106664	-3.21673	0.00129659	0.0956228
IFI27	1743.23	0.327408	7.19921	0.101813	3.21578	0.0013009	0.0956228
LGALS9	1539.8	0.331534	0.389382	0.10307	3.2166	0.00129721	0.0956228
RNU12	41.4132	-0.465529	-0.825856	0.144622	-3.21894	0.00128667	0.0956228
TRIM26	832.583	0.255385	0.278009	0.0793776	3.21735	0.00129383	0.0956228
RUNDC3A-AS1	36.2462	0.243455	0.262843	0.075864	3.2091	0.0013315	0.0973601
BISPR	497.451	0.380256	0.48379	0.118675	3.20419	0.00135442	0.0984847
RNASE6	2283.32	0.221163	0.235312	0.069053	3.2028	0.00136099	0.0984847
DDA1	299.173	0.217003	0.230339	0.0678262	3.19939	0.00137718	0.0991425
S100A10	11311.4	0.216647	0.229935	0.0677816	3.19625	0.00139227	0.0997148
C9orf172	17.0805	-0.420191	-0.586929	0.131834	-3.18728	0.00143617	0.100626
DKC1	487.276	-0.272291	-0.300961	0.0855112	-3.18427	0.00145118	0.100626
FOXP1	1194.8	-0.190495	-0.199302	0.0597853	-3.18632	0.00144095	0.100626
MCRIP2	267.957	-0.251475	-0.273301	0.078938	-3.18573	0.00144391	0.100626
NARS	3034.94	-0.192055	-0.201086	0.0602561	-3.18732	0.00143599	0.100626
RP11-517I3.2	17.0252	0.312583	0.360007	0.0979519	3.19119	0.00141687	0.100626
TNF	271.497	0.431285	0.640031	0.135478	3.18343	0.00145542	0.100626
CD163	3366.85	0.37627	0.477713	0.118349	3.17933	0.00147616	0.101557
CATIP	34.9982	-0.423389	-0.600833	0.133347	-3.17509	0.00149789	0.102547
LGALS9B	82.5176	0.329915	0.388941	0.103961	3.17346	0.00150633	0.102622
STAT5B	847.626	-0.208305	-0.220195	0.0657692	-3.16722	0.00153906	0.104342
PCMTD2	917.482	-0.256034	-0.279605	0.0809062	-3.16459	0.00155304	0.104782
DTX3L	1572.3	0.378372	0.48446	0.119663	3.16199	0.00156693	0.1052
ZNF101	129.53	0.356348	0.437908	0.112746	3.16062	0.00157431	0.1052
YTHDC1	375.469	0.217324	0.231133	0.0688375	3.15705	0.00159373	0.105991
BEST1	1616.31	-0.336403	-0.400268	0.106829	-3.14898	0.00163843	0.107936
RNASE2	1284.4	0.415865	0.591336	0.13204	3.14953	0.00163534	0.107936
UBL4A	658.421	-0.286735	-0.322186	0.0911772	-3.14482	0.00166191	0.108968
ST3GAL5	464.192	0.335468	0.401084	0.107172	3.13019	0.00174694	0.114008
CCDC186	325.104	0.349782	0.427781	0.11181	3.12836	0.00175786	0.114187
ANKRD22	172.53	0.444643	1.2134	0.142338	3.12386	0.00178497	0.115411
TSPAN3	1269.48	-0.256053	-0.280426	0.0820355	-3.12124	0.00180089	0.115904
KLF2	350.696	0.419675	0.617026	0.134807	3.11316	0.00185094	0.116464
MYL12BP1	111.497	0.183874	0.192162	0.0590326	3.11479	0.00184077	0.116464
TLN1	3680.85	0.148816	0.153075	0.0478029	3.11311	0.00185129	0.116464
TRIM5	641.888	0.377087	0.487199	0.121008	3.11621	0.00183191	0.116464
ZNF703	112.817	-0.389113	-0.512765	0.12498	-3.11341	0.00184939	0.116464
ATP5HP4	41.1467	0.270826	0.300994	0.0871066	3.10914	0.00187635	0.117512
GPR183	590.375	-0.450029	-0.81598	0.144947	-3.10478	0.00190421	0.117941
PPIAL4C	27.1622	-0.257013	-0.281997	0.0827776	-3.10486	0.00190368	0.117941
UBE2L6	5523.3	0.328485	0.390353	0.105823	3.10411	0.00190854	0.117941
GMPS	553.516	-0.264601	-0.292361	0.0853805	-3.09908	0.00194122	0.119432
AC093673.5	464.27	0.259683	0.286048	0.0839507	3.09328	0.0019796	0.121043
CNOT10	488.928	-0.259457	-0.285538	0.0838987	-3.09251	0.00198474	0.121043
PPOX	210.024	-0.317995	-0.372401	0.103014	-3.0869	0.00202252	0.122811
EIF3H	1745.8	-0.140378	-0.143998	0.0455283	-3.0833	0.00204717	0.12377
ZNF969P	45.988	-0.317601	-0.372228	0.10315	-3.07901	0.0020769	0.125026
SLC25A5P3	57.5895	-0.218392	-0.233164	0.0709664	-3.0774	0.00208814	0.125163
KDM1A	492.993	-0.278395	-0.312274	0.0906073	-3.07254	0.00212246	0.126676
FCGR1A	1016.26	0.375875	0.490431	0.122411	3.0706	0.00213626	0.126957
RHOG	4573.02	0.12686	0.129542	0.041397	3.06446	0.00218061	0.129044
TRPV2	691.601	0.224819	0.241383	0.0734247	3.0619	0.00219939	0.129606
CHMP5	1042.9	0.309323	0.360619	0.101261	3.0547	0.00225282	0.13207
SETDB2	258.925	-0.333628	-0.401335	0.109252	-3.05374	0.00226011	0.13207
MYL12A	7680.97	0.166195	0.172494	0.0545103	3.04887	0.00229703	0.133668
ZNF333	464.426	-0.250171	-0.274041	0.0821075	-3.04687	0.0023124	0.134004
USP27X	21.5808	0.426364	0.682337	0.139997	3.04552	0.00232281	0.134051
CRIP3	31.9216	-0.441731	-0.887767	0.145275	-3.04066	0.00236062	0.135672
WAS	1179.16	0.16384	0.169911	0.0539421	3.03733	0.00238684	0.136617
NAP1L1	1029.19	-0.230291	-0.248502	0.0758587	-3.03579	0.00239909	0.136758
RPS3AP49	47.8418	-0.280639	-0.316772	0.0926551	-3.02886	0.00245477	0.139363
CSTB	2539.39	0.1935	0.203956	0.0640762	3.01984	0.00252909	0.140722
EPHB2	96.8337	0.438396	0.859415	0.145146	3.02037	0.00252466	0.140722
FFAR2	176.369	0.426198	0.698554	0.141064	3.02131	0.00251687	0.140722
NHSL1	69.7996	0.390809	0.540177	0.129324	3.02195	0.00251153	0.140722
RANBP9	138.352	0.316487	0.374239	0.104683	3.02327	0.00250056	0.140722
TTC39B	127.617	0.400031	0.572552	0.132641	3.0159	0.00256222	0.142
CH17-373J23.1	67.8499	-0.428917	-0.707527	0.142655	-3.00666	0.00264131	0.14545
NRIR	50.632	0.383016	1.81279	0.127409	3.0062	0.00264531	0.14545
TAP1	2382.3	0.330071	0.399856	0.109955	3.00188	0.00268314	0.146952
U1	77.0729	-0.415334	-0.631091	0.138616	-2.99629	0.00273287	0.149091
CNP	1249.87	0.254966	0.281807	0.085205	2.99239	0.00276807	0.149755
RP11-1017G21.5	31.0889	-0.424577	-0.687787	0.141934	-2.99138	0.00277721	0.149755
RP11-96K19.4	34.3844	0.386923	0.534846	0.129304	2.99235	0.0027684	0.149755
C8orf37	24.008	-0.425918	-0.699828	0.142492	-2.98907	0.00279825	0.150309
DYSF	1054.5	0.38587	0.532356	0.129147	2.98784	0.00280954	0.150337
CLU	391.752	0.401023	1.49741	0.134305	2.98591	0.00282736	0.150469
RP11-16E23.4	226.53	0.3225	0.387105	0.108032	2.98524	0.00283355	0.150469
GSTO3P	64.607	0.214656	0.229757	0.0719562	2.98314	0.00285304	0.15093
LGALS9DP	231.322	0.314056	0.372471	0.105383	2.98015	0.00288107	0.151838
ACSL1	3201.34	0.302638	0.353366	0.101652	2.97719	0.00290902	0.151967
LGALS9C	123.909	0.307428	0.361369	0.103287	2.97644	0.00291616	0.151967
PRR13P5	604.743	0.111192	0.11309	0.0373292	2.97869	0.00289485	0.151967
CECR5	1110.98	-0.184574	-0.193853	0.0621123	-2.97161	0.00296239	0.152257
FOS	54488.1	-0.405835	-0.598555	0.136543	-2.97221	0.00295665	0.152257
2018-09-02	4613.63	-0.199564	-0.211505	0.0671604	-2.97145	0.00296395	0.152257
SLC38A1	49.5711	0.430056	0.811001	0.144736	2.97131	0.00296534	0.152257
IFI16	1980.84	0.315298	0.375283	0.1062	2.96892	0.00298848	0.152552
LEKR1	19.8817	-0.426304	-0.966963	0.143611	-2.96846	0.00299293	0.152552
PPM1K	224.132	0.379647	0.518012	0.127955	2.96704	0.00300684	0.152704
JPH4	71.406	0.430342	0.923756	0.145323	2.96129	0.00306358	0.155021
ASB13	511.53	-0.278697	-0.316225	0.0942445	-2.95717	0.00310479	0.156111
OLFML2A	21.9697	0.361566	0.471304	0.122279	2.9569	0.00310747	0.156111
GADD45G	39.723	-0.425033	-0.731221	0.143925	-2.95316	0.00314543	0.157452
CA5BP1	302.828	0.216106	0.232022	0.0733909	2.94459	0.00323383	0.160156
FOSL1	66.9802	0.404927	1.34703	0.137467	2.94563	0.00322303	0.160156
KIAA1161	23.9708	0.294438	0.341614	0.0999931	2.94459	0.00323386	0.160156
AC098823.3	26.5459	0.319686	0.385197	0.108804	2.93817	0.00330155	0.16087
CCDC82	346.165	-0.280156	-0.319161	0.0954427	-2.93533	0.0033319	0.16087
CTD-2006C1.2	91.6919	-0.247359	-0.272515	0.0842742	-2.93516	0.00333371	0.16087
CYSTM1	558.452	0.257624	0.286807	0.0877264	2.93667	0.00331754	0.16087
DNPH1	329.267	-0.235779	-0.257217	0.0804828	-2.92956	0.00339446	0.16087
HMGB1P5	1043.76	-0.106622	-0.10834	0.0363125	-2.93625	0.00332212	0.16087
IL31RA	29.5914	0.427065	0.905264	0.145356	2.93806	0.00330276	0.16087
KDM6B	193.581	0.31208	0.371985	0.106519	2.9298	0.00339182	0.16087
L3HYPDH	116.369	-0.358101	-0.46302	0.122251	-2.92923	0.00339801	0.16087
RASA4	313.112	-0.374099	-0.503055	0.127556	-2.93283	0.00335887	0.16087
SLFN5	474.066	0.403015	0.615454	0.137468	2.93169	0.00337126	0.16087
SP140	115.467	0.415193	0.689127	0.141588	2.93239	0.00336361	0.16087
TANGO2	583.728	-0.212999	-0.228133	0.0724338	-2.9406	0.00327575	0.16087
SLC6A4	18.9217	0.300907	0.353049	0.102795	2.92725	0.00341977	0.161353
IL10RA	4417.8	-0.240027	-0.262942	0.0821263	-2.92266	0.00347055	0.162473
RP11-461F11.2	34.5166	0.250537	0.277288	0.085743	2.92196	0.00347841	0.162473
STAT1	6740.54	0.395238	0.583611	0.135184	2.9237	0.00345893	0.162473
RP11-1K3.1	36.6412	0.422927	0.806789	0.144896	2.91884	0.00351342	0.163018
TBC1D2	1199.48	0.233719	0.254852	0.0800668	2.91905	0.00351094	0.163018
RAB3A	30.8684	-0.422137	-0.757826	0.144782	-2.91568	0.00354919	0.164132
SNRNP35	271.309	0.255732	0.284711	0.0877405	2.91464	0.00356094	0.164132
SRGAP2	643.185	0.250269	0.277185	0.0859393	2.91217	0.00358932	0.164854
TTC19	695.83	-0.252175	-0.279596	0.0866218	-2.91122	0.00360021	0.164854
PDE7A	198.908	0.358157	0.469866	0.123188	2.90741	0.00364433	0.166329
ENOPH1	455.421	-0.246452	-0.271892	0.0848071	-2.90603	0.00366046	0.166521
SRSF8	604.921	-0.240626	-0.264107	0.0828731	-2.90355	0.00368954	0.166758
VAMP5	1202.53	0.343045	0.434785	0.118124	2.90411	0.00368298	0.166758
AC092155.1	78.7724	-0.204941	-0.218679	0.070651	-2.90075	0.00372269	0.167174
RAB4A	879.788	-0.203411	-0.216822	0.0701033	-2.90159	0.00371278	0.167174
BCL7B	1107.47	0.23694	0.259478	0.0817559	2.89814	0.00375388	0.167842
RP11-680B3.2	27.3209	0.233419	0.254878	0.0805589	2.89749	0.0037616	0.167842
EIF3L	1618.43	-0.250903	-0.278215	0.0866603	-2.89525	0.00378862	0.168509
MTCO1P12	35284.1	-0.23744	-0.260076	0.082078	-2.89286	0.00381755	0.169027
TMEM60	317.477	0.327894	0.40423	0.113369	2.89229	0.00382448	0.169027
PUS7	47.7028	-0.415887	-0.931458	0.143883	-2.89045	0.00384695	0.169484
CORO2A	173.846	0.401468	0.628823	0.138948	2.88935	0.0038604	0.169542
RP11-440L14.1	42.9087	-0.306933	-0.364521	0.106388	-2.88503	0.00391372	0.171345
CHST12	381.988	0.23342	0.255179	0.0810843	2.87873	0.0039928	0.174105
RP11-707G18.1	62.1621	-0.396812	-0.596305	0.137877	-2.87803	0.0040017	0.174105
APOL1	138.897	0.353411	0.462967	0.122995	2.87338	0.00406103	0.175593
RP11-274E7.2	25.8911	0.351972	0.459422	0.122491	2.87346	0.00406007	0.175593
AGO3	487.48	0.198426	0.21114	0.0690991	2.87162	0.00408377	0.176031
ECHDC1	1400.06	-0.200568	-0.213705	0.0698977	-2.86945	0.00411184	0.176283
LAP3	4778.56	0.38714	0.569595	0.134929	2.86922	0.00411487	0.176283
KANTR	20.0098	0.314132	0.379943	0.109564	2.86712	0.00414221	0.176912
RNF113A	338.193	-0.221789	-0.240193	0.0774281	-2.86445	0.00417734	0.177868
SAFB	884.834	-0.190358	-0.201501	0.0665049	-2.86232	0.00420554	0.178524
CH507-42P11.8	36.767	-0.415872	-0.795514	0.145348	-2.86122	0.00422008	0.178599
AHR	574.377	0.300435	0.355956	0.105171	2.85664	0.00428154	0.180116
2018-09-04	85.9397	0.41527	0.858696	0.145371	2.85662	0.00428173	0.180116
RP11-498C9.15	31.3158	-0.346877	-0.446475	0.121498	-2.85501	0.00430357	0.180491
CLIC1	13721.1	0.133253	0.136881	0.0466897	2.85401	0.00431709	0.180516
PRKAA1	553.305	-0.236236	-0.259275	0.0828463	-2.8515	0.00435135	0.181406
PIGS	1797.25	-0.128214	-0.131445	0.0450314	-2.84721	0.00441043	0.183322
ARHGDIA	1869.05	0.174109	0.182603	0.061192	2.8453	0.00443702	0.18388
CTD-3131K8.2	47.6993	0.352904	0.466057	0.124078	2.84421	0.00445215	0.183961
ATP10A	76.5225	0.407629	1.03437	0.14351	2.84042	0.00450543	0.183982
CNR2	47.8642	0.21687	0.234399	0.07631	2.84196	0.00448373	0.183982
EEF1B2P2	29.8388	-0.299655	-0.354618	0.105509	-2.84008	0.00451022	0.183982
JUNB	22053	-0.310943	-0.374503	0.109498	-2.8397	0.00451561	0.183982
RP11-365P13.5	40.2952	-0.408408	-0.700557	0.143831	-2.83949	0.00451852	0.183982
CCR5	53.2875	0.409639	0.978498	0.144408	2.83668	0.00455857	0.184801
HSP90B1	4203	-0.172857	-0.181192	0.0609462	-2.83622	0.00456512	0.184801
AC006483.5	218.467	0.171413	0.179563	0.0604786	2.83427	0.00459301	0.185393
CCBE1	25.7615	0.245856	0.273057	0.0868549	2.83065	0.00464535	0.185685
EPDR1	17.1123	0.379091	1.42036	0.13395	2.83009	0.00465343	0.185685
FANCL	87.0367	0.351587	0.464621	0.124157	2.83179	0.00462876	0.185685
GSDMD	1149.31	0.229316	0.250626	0.080982	2.83169	0.00463028	0.185685
HESX1	23.2388	0.338722	2.02398	0.119767	2.82817	0.00468147	0.185779
HLA-DOA	110.206	-0.410598	-0.837911	0.145185	-2.82811	0.00468239	0.185779
CDK11B	173.504	0.268387	0.306159	0.0954037	2.81318	0.00490547	0.18645
DENND1A	2032.99	0.16501	0.172313	0.0585423	2.81865	0.00482264	0.18645
EEF1B2P6	162.407	-0.250993	-0.280278	0.0891018	-2.81693	0.00484852	0.18645
FXYD5	3060.9	0.164052	0.171232	0.0582447	2.81659	0.00485361	0.18645
MAPKAPK5-AS1	388.181	-0.274412	-0.314699	0.0973667	-2.81834	0.00482725	0.18645
MLLT6	124.544	0.305976	0.368455	0.108703	2.81479	0.00488087	0.18645
MT1F	109.754	0.350491	0.462965	0.12409	2.82449	0.00473564	0.18645
NMI	1695.44	0.265659	0.301883	0.0942724	2.818	0.00483242	0.18645
ODF3B	958.118	0.267681	0.305081	0.0951423	2.81348	0.00490084	0.18645
OPTN	122.445	0.410387	0.859312	0.145369	2.82307	0.0047566	0.18645
PARP12	1005.95	0.388134	0.596276	0.137865	2.81532	0.00487294	0.18645
RCSD1	3944.72	-0.17264	-0.181096	0.061379	-2.81269	0.0049129	0.18645
RPS6KA1	3164.91	-0.193003	-0.205065	0.0684659	-2.81897	0.00481779	0.18645
SQLE	236.432	0.388572	0.593662	0.13752	2.82556	0.00471974	0.18645
TDRD7	600.973	0.350284	0.464182	0.124525	2.81297	0.00490866	0.18645
ZC3HAV1	1261.08	0.248386	0.276886	0.0881896	2.8165	0.00485502	0.18645
EPRS	865.441	-0.244039	-0.270715	0.0867988	-2.81155	0.00493033	0.186604
DYNC1LI1	859.015	-0.184621	-0.195191	0.0658518	-2.80358	0.00505382	0.190336
LAMB4	19.4924	0.260906	0.295355	0.0931241	2.8017	0.00508343	0.190336
SLC4A1	29.6204	0.3433	0.448153	0.122531	2.80174	0.0050828	0.190336
SNW1	1451.25	-0.142631	-0.147291	0.0509036	-2.80199	0.00507882	0.190336
RP11-3D23.1	40.9262	0.279776	0.324442	0.0999126	2.80021	0.00510695	0.190705
PP7080	79.1991	-0.379058	-0.552035	0.135511	-2.79726	0.00515384	0.191943
CXCL10	503.992	0.406018	0.85244	0.145366	2.79308	0.00522086	0.193922
SLC39A8	245.187	0.405444	0.807939	0.145271	2.79096	0.00525518	0.194679
WBP2	1596.25	0.158601	0.165189	0.0568619	2.78924	0.00528318	0.195198
DDX58	919.063	0.386156	0.599959	0.138529	2.78754	0.005311	0.195708
EEF1A1P16	92.4919	-0.223233	-0.243315	0.080148	-2.78526	0.00534852	0.19591
TXN	1673.12	0.190468	0.202385	0.0683839	2.78528	0.00534821	0.19591
USP30-AS1	29.789	0.393025	0.644814	0.14114	2.78465	0.00535856	0.19591
LA16c-390H2.4	27.4954	0.24905	0.278747	0.0895018	2.78263	0.00539208	0.196621
KLHL33	66.2416	0.185265	0.196218	0.0666876	2.77811	0.00546762	0.198779
TNFSF13B	4733.3	0.236354	0.261154	0.0850994	2.77739	0.00547973	0.198779
RP11-156K23.3	66.7485	-0.380864	-0.56713	0.137184	-2.77631	0.00549799	0.198925
AC007326.1	25.1683	0.284802	0.334083	0.102808	2.77024	0.00560149	0.199577
ATP5F1	3435.15	-0.12663	-0.129914	0.0456475	-2.77408	0.00553573	0.199577
BATF2	88.1945	0.39855	0.971989	0.144103	2.76572	0.00567967	0.199577
C12orf66	70.5429	-0.359907	-0.494322	0.12995	-2.76958	0.00561279	0.199577
CST3	26517.9	0.147842	0.153245	0.0536022	2.75812	0.00581344	0.199577
DCUN1D4	236.56	-0.325402	-0.40913	0.117746	-2.76359	0.00571697	0.199577
GIGYF1	302.08	0.181639	0.192001	0.0656433	2.76707	0.00565628	0.199577
GNG5	3432.48	0.150382	0.156085	0.0545264	2.75797	0.00581612	0.199577
HERPUD1	4273.86	-0.187893	-0.199436	0.0679458	-2.76534	0.00568642	0.199577
MSMO1	177.718	0.36977	0.537295	0.133977	2.75995	0.00578106	0.199577
MYD88	9561.88	0.180597	0.190725	0.0651494	2.77204	0.00557056	0.199577
POMP	2013.84	0.192767	0.205321	0.0695985	2.7697	0.00561074	0.199577
PTPN11	794.936	-0.218761	-0.237963	0.0792896	-2.75901	0.00579771	0.199577
RPL21P39	87.3343	-0.202859	-0.217678	0.0733359	-2.76617	0.00567195	0.199577
RPLP0P6	564.357	-0.208262	-0.224548	0.0754949	-2.75862	0.00580456	0.199577
SIK1	33.9271	-0.40279	-0.75538	0.145248	-2.77311	0.00555234	0.199577
SLC25A5P5	70.8574	-0.212675	-0.23013	0.0770778	-2.75922	0.0057939	0.199577
TNFRSF12A	62.6186	0.401303	0.850182	0.14535	2.76094	0.00576348	0.199577
UBE2L3	1451.47	0.137411	0.141687	0.0497178	2.76382	0.00571282	0.199577
ZNF185	776.809	-0.303681	-0.366719	0.110048	-2.75952	0.00578855	0.199577
ZNF274	180.589	-0.333188	-0.426172	0.120568	-2.7635	0.00571857	0.199577
ZNF420	63.6012	-0.400469	-0.788895	0.14536	-2.75501	0.00586907	0.200901
COA3	825.873	0.20134	0.216041	0.0731458	2.75259	0.00591263	0.200969
IL15RA	364.831	0.333234	0.430431	0.121045	2.75298	0.00590562	0.200969
OSGEP	496.007	-0.23561	-0.260489	0.0855985	-2.7525	0.00591424	0.200969
CES1P2	72.8361	0.396218	0.716108	0.144078	2.75002	0.00595914	0.201514
FGD5-AS1	1281.38	-0.168538	-0.176764	0.0612796	-2.75031	0.00595393	0.201514
RP11-160E2.6	18.9771	-0.394676	-0.670449	0.143572	-2.74897	0.00597824	0.201672
RP11-867G23.3	2590.49	0.316392	0.393869	0.115139	2.74791	0.00599756	0.201836
RNASE3	71.202	0.393567	0.692102	0.143461	2.74336	0.00608137	0.203675
RP11-680A11.5	19.0834	0.37436	0.562665	0.136445	2.74366	0.00607587	0.203675
HYPK	567.86	0.207048	0.223364	0.0755723	2.73973	0.00614902	0.204958
PTPRO	140.955	0.397578	0.88404	0.145115	2.73974	0.00614885	0.204958
IER2	7083.76	-0.338889	-0.443378	0.123922	-2.7347	0.00624363	0.20716
TRIM25	501.465	0.298508	0.360161	0.109158	2.73464	0.00624477	0.20716
CES1	1710.47	0.393508	0.706339	0.143946	2.73372	0.00626237	0.207247
EIF3LP2	88.8402	-0.240967	-0.268339	0.0881711	-2.73295	0.00627706	0.207247
TSPAN4	750.762	-0.248565	-0.279237	0.0910835	-2.72898	0.00635304	0.209261
CBX1	253.499	-0.292033	-0.347894	0.107068	-2.72754	0.00638078	0.20968
ELMSAN1	899.614	0.246715	0.276943	0.0904891	2.72646	0.00640172	0.209874
LINC00877	497.079	-0.262154	-0.299451	0.096215	-2.72467	0.00643652	0.210127
NUP133	285.851	-0.311544	-0.384377	0.114348	-2.72452	0.00643952	0.210127
IL15	494.723	0.301521	0.366758	0.110805	2.72119	0.00650473	0.21159
MT-TL1	22.7793	0.294211	0.3533	0.108138	2.72069	0.00651464	0.21159
HFE	160.349	-0.321337	-0.405007	0.118161	-2.7195	0.00653812	0.211859
CCL8	29.792	0.295806	2.55848	0.108899	2.71634	0.00660079	0.213395
WTIP	51.152	0.178693	0.18894	0.0658087	2.71534	0.00662081	0.213548
CUL1	1379.58	0.328602	0.424762	0.12116	2.71213	0.00668515	0.215126
CD79B	118.575	0.357264	0.505962	0.131782	2.71103	0.00670753	0.21535
AP000253.1	22.9715	0.296245	0.357636	0.109336	2.7095	0.00673847	0.215495
QTRT1	130.503	-0.296535	-0.357092	0.109452	-2.70928	0.0067429	0.215495
GHRL	54.5068	-0.372371	-0.55898	0.13774	-2.70344	0.00686266	0.216607
MIR142	126.273	0.337191	0.447824	0.124833	2.70113	0.00691037	0.216607
NFXL1	284.563	-0.382897	-0.618545	0.141769	-2.70085	0.00691624	0.216607
PLK3	463.699	0.345879	0.472114	0.128065	2.7008	0.00691728	0.216607
RASA4CP	111.435	-0.298565	-0.361019	0.11033	-2.7061	0.00680784	0.216607
RP11-22N19.2	95.1368	-0.392846	-0.756264	0.145361	-2.70255	0.00688093	0.216607
RP11-632K20.7	99.288	-0.246027	-0.276407	0.0910849	-2.70107	0.00691158	0.216607
SNORD3A	70.9921	-0.383089	-0.618026	0.141719	-2.70317	0.00686818	0.216607
SRGAP2C	1223.08	0.209136	0.226578	0.0774042	2.70187	0.00689499	0.216607
C5orf56	246.206	0.280765	0.331202	0.104168	2.69531	0.0070323	0.219716
PRRC2B	369.269	0.216952	0.23684	0.0805307	2.69402	0.00705949	0.220073
EEF1E1	114.693	-0.266963	-0.308293	0.099283	-2.68891	0.00716862	0.222978
UGCG	161.887	0.321953	0.412653	0.119903	2.68511	0.00725054	0.225025
ATP6V0E1	5625.09	0.116943	0.119698	0.0435855	2.68308	0.00729479	0.225396
ZC3H15	1302.87	-0.158431	-0.165558	0.0590397	-2.68346	0.00728653	0.225396
TCIRG1	5909.56	0.137994	0.142619	0.051486	2.68022	0.00735744	0.22683
LRPPRC	625.611	-0.230808	-0.25558	0.0861581	-2.67889	0.00738661	0.226928
PID1	845.546	-0.344283	-0.466966	0.128531	-2.6786	0.0073931	0.226928
CCNT2	687.342	-0.229859	-0.254309	0.0858425	-2.67769	0.00741327	0.226988
RASA4DP	66.43	-0.324092	-0.415894	0.121072	-2.67685	0.00743171	0.226988
RP11-671J11.5	103.948	0.187276	0.199605	0.0699755	2.67631	0.00744381	0.226988
NUP188	332.104	-0.304796	-0.375451	0.114025	-2.67307	0.00751606	0.227699
RP11-981G7.1	17.975	0.310311	0.388388	0.116032	2.67436	0.00748712	0.227699
TOP1	402.759	0.249516	0.282643	0.0933373	2.67328	0.00751145	0.227699
C16orf54	2273.49	0.233526	0.259782	0.0874929	2.66909	0.00760573	0.227988
CCL5	45.5692	0.362963	0.542111	0.136063	2.6676	0.00763956	0.227988
ITGB2-AS1	973.854	-0.262387	-0.301959	0.0983331	-2.66835	0.00762252	0.227988
ORAI2	925.254	-0.216897	-0.237118	0.0813085	-2.66759	0.00763985	0.227988
PLAGL1	410.413	-0.268878	-0.312227	0.100774	-2.66814	0.00762734	0.227988
RP11-57A19.2	20.8701	0.232963	0.258974	0.0872122	2.67122	0.00755771	0.227988
TWSG1	159.749	-0.364226	-0.537033	0.136448	-2.66935	0.00759978	0.227988
RPL3P2	181.223	-0.175077	-0.185058	0.065732	-2.6635	0.00773329	0.229794
TRIM56	404.991	0.234458	0.261216	0.0880099	2.664	0.00772176	0.229794
ZNF483	63.5886	0.181304	0.192548	0.068108	2.66201	0.00776763	0.230324
CTA-85E5.6	115.036	-0.229736	-0.254548	0.0863924	-2.65922	0.00783225	0.231538
CWC25	579.702	0.203287	0.219751	0.076458	2.65881	0.00784173	0.231538
TRMO	261.761	-0.298415	-0.364339	0.112292	-2.6575	0.00787222	0.231948
FAM101B	812.209	-0.29943	-0.366366	0.112721	-2.65638	0.00789849	0.232232
PRMT2	2102.96	-0.173906	-0.183745	0.0654987	-2.6551	0.00792845	0.232623
LINC00355	39.8455	0.227885	0.25235	0.0858857	2.65335	0.00796964	0.233342
CTD-3092A11.2	104.913	-0.316014	-0.400853	0.119189	-2.65138	0.00801633	0.233729
MIR24-2	417.002	0.370524	0.588341	0.139721	2.65188	0.00800458	0.233729
FKBP15	1436.92	0.170102	0.179334	0.0642036	2.64941	0.00806331	0.234121
LGALS1	3751.63	0.224079	0.247216	0.0845568	2.65003	0.00804835	0.234121
NONO	2169.21	-0.125827	-0.129378	0.0475166	-2.64806	0.00809552	0.234569
CTD-3014M21.1	702.479	-0.383568	-0.699937	0.144988	-2.64552	0.00815659	0.235849
CCT8	2237.27	-0.154927	-0.161794	0.0586439	-2.64182	0.00824622	0.23631
HMBS	387.244	-0.283729	-0.338553	0.107417	-2.64137	0.00825714	0.23631
NOA1	325.785	-0.238249	-0.266885	0.0901399	-2.64311	0.00821489	0.23631
RPS3AP47	247.145	-0.217137	-0.237893	0.0821656	-2.64268	0.00822528	0.23631
TPGS2	600.358	-0.227331	-0.251648	0.0860313	-2.64242	0.00823159	0.23631
STAT2	1857.84	0.300256	0.370786	0.113711	2.64052	0.00827793	0.23642
C14orf79	22.0582	0.380186	0.701542	0.144468	2.63164	0.0084975	0.241212
CLEC12A	4806.5	-0.272432	-0.319726	0.103489	-2.63246	0.00847686	0.241212
F2R	21.7826	0.371436	0.608245	0.14111	2.63224	0.00848242	0.241212
RASSF3	2847.98	0.255178	0.29274	0.0970199	2.63016	0.00853442	0.241768
APOBEC3G	794.086	0.285925	0.344458	0.108861	2.62651	0.00862657	0.24316
SMAD3	461.662	0.294894	0.361341	0.112251	2.6271	0.00861169	0.24316
TUBB1	37.1628	0.340573	1.44435	0.129685	2.62615	0.00863577	0.24316
CTSD	6829.65	0.208292	0.226727	0.0793675	2.62439	0.00868034	0.243923
MT-CO1	103584	-0.213171	-0.233029	0.0812835	-2.62256	0.00872728	0.244749
RP11-425D10.10	26.4587	-0.375665	-0.633038	0.143303	-2.62147	0.00875507	0.245037
COL4A3BP	1117.73	0.154294	0.161213	0.0588878	2.62014	0.00878937	0.245505
CFL1P2	58.8491	0.181916	0.193715	0.0694717	2.61856	0.00883013	0.245623
HINFP	259.824	-0.264636	-0.30767	0.101094	-2.61772	0.00885197	0.245623
PLEKHA3	387.342	0.236752	0.265674	0.0903891	2.61926	0.00881217	0.245623
RP11-373D23.2	20.0314	-0.380429	-0.752783	0.145354	-2.61726	0.00886394	0.245623
FAM136A	614.628	-0.19457	-0.209264	0.074364	-2.61646	0.00888479	0.245713
AP5B1	1405.39	0.228537	0.254151	0.0873837	2.61533	0.00891419	0.246039
TPST2	1436.7	0.222366	0.245681	0.0850813	2.61357	0.00896023	0.246822
2018-03-03	19.0564	0.355084	1.22125	0.136001	2.61089	0.00903077	0.248275
PHF1	129.922	0.305266	0.384068	0.116967	2.60985	0.00905818	0.248539
S1PR2	126.457	0.316073	0.408476	0.121142	2.60911	0.00907786	0.248591
TMSB10	18644.9	0.174865	0.185327	0.0670541	2.60782	0.00911212	0.249041
GOLIM4	529.472	-0.213099	-0.233297	0.0818638	-2.6031	0.00923861	0.250537
LGALS3	9982.71	-0.129872	-0.133931	0.0498572	-2.60488	0.00919063	0.250537
PEA15	2888.24	-0.221025	-0.243897	0.084881	-2.60394	0.00921577	0.250537
PYCARD-AS1	25.5065	0.363051	0.573468	0.139441	2.60363	0.00922429	0.250537
MIR4435-2HG	264.501	0.246508	0.28059	0.0947851	2.60071	0.0093032	0.251799
AP001442.2	24.6438	0.334289	0.458676	0.128653	2.59839	0.00936633	0.252093
CTD-2095E4.5	62.5607	0.373314	0.661425	0.143675	2.59832	0.00936819	0.252093
RPS3AP5	497.265	-0.222435	-0.245919	0.0855806	-2.59913	0.00934593	0.252093
AC023590.1	17.7746	0.26025	0.30219	0.1002	2.59731	0.00939576	0.252348
AIM1	897.89	0.208965	0.228085	0.0804761	2.59661	0.00941498	0.252379
FLNB	108.047	0.374128	0.904802	0.144164	2.59516	0.00945471	0.252959
RP11-386M24.4	29.3219	0.203739	0.221329	0.0785439	2.59395	0.00948813	0.253368
CES1P1	472.905	0.373906	0.683258	0.144324	2.59073	0.0095772	0.253892
FBXO7	2014.16	0.149183	0.155547	0.0575623	2.59169	0.00955061	0.253892
RP11-180M15.7	42.4267	-0.357279	-0.537869	0.137913	-2.59061	0.0095805	0.253892
RPS4XP3	63.2322	-0.202274	-0.219368	0.0780451	-2.59175	0.00954885	0.253892
KMT5A	116.036	0.283313	0.342265	0.109431	2.58896	0.00962674	0.254153
MT-TS1	1040.93	-0.218942	-0.241384	0.0845501	-2.58949	0.00961169	0.254153
EEF1A1P22	125.16	-0.202672	-0.220041	0.078502	-2.58175	0.00983018	0.254238
GNG5P2	190.073	0.153583	0.160624	0.0594788	2.58215	0.00981864	0.254238
L3MBTL3	110.867	-0.329759	-0.443757	0.127562	-2.58509	0.00973527	0.254238
MRPS18C	368.128	0.222866	0.247069	0.0862982	2.58251	0.00980854	0.254238
NUPR1	55.9146	0.187502	0.200924	0.0724661	2.58745	0.00966886	0.254238
RP11-147L13.2	28.8073	-0.311773	-0.399209	0.120758	-2.5818	0.00982867	0.254238
SLC35F6	1164.68	0.148298	0.154574	0.0573555	2.5856	0.00972097	0.254238
SOWAHC	97.2429	0.363241	0.587085	0.140572	2.58403	0.00976538	0.254238
SRGAP2B	1271.35	0.208231	0.227308	0.0805104	2.58638	0.00969889	0.254238
UNC93B6	97.7911	0.220085	0.243181	0.0850906	2.58648	0.00969608	0.254238
ZNF563	20.0432	-0.362935	-0.929363	0.140522	-2.58277	0.00980113	0.254238
C9orf91	285.143	0.312773	0.404519	0.121259	2.57937	0.00989808	0.255521
RP11-421N8.1	384.731	-0.150832	-0.157482	0.0585037	-2.57817	0.00993255	0.255937
EXOC3L1	41.9831	0.3744	0.743518	0.145267	2.57731	0.0099572	0.2561
EIF1AX	958.151	-0.173975	-0.184521	0.0675369	-2.576	0.00999516	0.256604
TTC38	373.936	0.244045	0.277785	0.0947811	2.57483	0.010029	0.257001
CMTR1	715.604	0.291153	0.358507	0.113186	2.57234	0.0101014	0.258353
SPATA2L	214.507	0.266296	0.3133	0.103547	2.57174	0.0101188	0.258353
H2AFJ	364.992	0.20646	0.225292	0.080371	2.56884	0.0102039	0.258636
ORC5	199.088	-0.320896	-0.422924	0.124896	-2.56931	0.0101903	0.258636
PPP1R18	2242.38	0.111903	0.114534	0.0435444	2.56987	0.0101736	0.258636
RPL36AP45	70.8632	0.177122	0.188412	0.0689455	2.56901	0.0101988	0.258636
IQCG	134.05	-0.299484	-0.374564	0.116803	-2.564	0.0103472	0.261792
FAM105A	3206.4	-0.177523	-0.188966	0.0693999	-2.55798	0.0105283	0.264935
GOSR1	337.288	0.202181	0.219884	0.0790093	2.55895	0.0104988	0.264935
IFI27L2	386.245	0.198563	0.215226	0.0776248	2.55799	0.010528	0.264935
AGPAT3	642.468	0.227435	0.254158	0.0890367	2.55439	0.0106374	0.266717
TCF4	276.307	0.30823	0.39694	0.120644	2.55488	0.0106224	0.266717
ING1	281.042	-0.262092	-0.306564	0.102634	-2.55366	0.0106597	0.266798
RP11-355B11.2	43.008	-0.34312	-0.493506	0.134434	-2.55233	0.0107006	0.266874
RP13-554M15.7	22.0877	0.300538	0.379855	0.117751	2.55232	0.010701	0.266874
CCL3L3	179.067	-0.349334	-0.992474	0.136927	-2.55124	0.0107339	0.267219
ASGR2	1457.44	0.255152	0.296109	0.100137	2.54803	0.0108332	0.267712
FAM89A	103.923	0.367971	0.676928	0.144446	2.54746	0.0108511	0.267712
GLULP4	151.463	0.220239	0.244229	0.0863709	2.54992	0.0107747	0.267712
RP11-34F20.7	25.3932	-0.370278	-0.745609	0.145289	-2.54857	0.0108166	0.267712
RPL36AP21	118.032	0.155341	0.162857	0.0609922	2.54689	0.0108687	0.267712
TNFSF10	7269.44	0.323914	0.438406	0.12715	2.5475	0.0108499	0.267712
RPS3AP26	569.81	-0.223425	-0.248606	0.0878622	-2.5429	0.0109936	0.27031
MAPK13	60.5308	0.309921	0.402792	0.12195	2.54137	0.0110417	0.270736
PRKAG2	670.193	0.199844	0.217158	0.0786627	2.54051	0.011069	0.270736
SH3GLB1	1919.21	0.141975	0.147651	0.0558774	2.54082	0.0110592	0.270736
EEF1B2	1299.67	-0.214562	-0.236536	0.0845197	-2.53861	0.0111295	0.271263
GTPBP10	141.714	0.279429	0.338577	0.110067	2.53872	0.011126	0.271263
RPS3A	3557.65	-0.216019	-0.23853	0.085121	-2.53779	0.0111555	0.271426
ATRAID	2219.23	-0.107048	-0.109405	0.0422182	-2.5356	0.0112255	0.272008
MAP4K1	354.809	-0.258304	-0.301188	0.101846	-2.53621	0.0112061	0.272008
WDR12	208.174	-0.264588	-0.311628	0.104365	-2.53521	0.0112379	0.272008
FAM65B	1716.74	0.196838	0.213388	0.077683	2.53386	0.0112814	0.272589
FAM110A	492.712	-0.215677	-0.23818	0.0851655	-2.53245	0.011327	0.273216
CAT	4784.23	-0.154275	-0.161719	0.0609609	-2.53072	0.011383	0.273622
CHEK2	79.2298	-0.360464	-0.592522	0.142433	-2.53077	0.0113813	0.273622
SNORD3B-1	56.6521	-0.356288	-0.564064	0.14082	-2.53009	0.0114033	0.273641
NR4A1	306.609	-0.367054	-0.757431	0.145118	-2.52935	0.0114273	0.273745
ABCE1	540.421	-0.262385	-0.308966	0.104302	-2.51562	0.0118822	0.274291
CEP97	90.1016	0.311971	0.411428	0.123975	2.51641	0.0118557	0.274291
EEF1B2P3	143.359	-0.230644	-0.259506	0.0915801	-2.5185	0.0117857	0.274291
F3	17.9294	0.362469	0.640319	0.143609	2.524	0.0116027	0.274291
GNG2	1181.4	-0.245544	-0.281832	0.0975832	-2.51625	0.011861	0.274291
GREM1	17.2066	0.346702	0.531386	0.137788	2.51619	0.011863	0.274291
LARP1	636.143	0.206704	0.226385	0.0818064	2.52675	0.0115123	0.274291
LINC00152	181.276	0.232066	0.261725	0.0919945	2.52261	0.0116489	0.274291
LINC00528	145.832	-0.350561	-0.53811	0.13913	-2.51967	0.0117466	0.274291
MAPKAPK3	4304.01	-0.137064	-0.142235	0.0544405	-2.51768	0.011813	0.274291
MTND4P12	912.976	-0.345003	-0.509822	0.136586	-2.5259	0.0115401	0.274291
PSME2	7108.54	0.268471	0.319911	0.106506	2.52071	0.0117117	0.274291
RNU5F-1	26.461	-0.354611	-0.555457	0.140285	-2.52779	0.0114781	0.274291
RPL5	5693.63	-0.213559	-0.235558	0.0847206	-2.52074	0.0117109	0.274291
SCCPDH	723.903	0.280358	0.341796	0.111288	2.51922	0.0117616	0.274291
SRP68	729.6	-0.224413	-0.250452	0.0888817	-2.52486	0.0115746	0.274291
STK35	164.93	0.319887	0.432522	0.127036	2.51808	0.0117997	0.274291
STX11	4392.23	0.190572	0.20564	0.0756862	2.51793	0.0118048	0.274291
TMEM203	728.146	-0.175772	-0.187174	0.0695927	-2.52572	0.0115461	0.274291
TRIM38	1786.2	0.173964	0.185049	0.0689436	2.52327	0.0116268	0.274291
UNC93B3	98.0411	0.24788	0.285582	0.098185	2.52462	0.0115822	0.274291
YKT6	361.377	0.223235	0.249053	0.0884796	2.52301	0.0116355	0.274291
CREBL2	818.332	-0.254285	-0.295854	0.101275	-2.51084	0.0120444	0.275761
CYSLTR1	735.323	0.267545	0.318915	0.106583	2.51021	0.0120659	0.275761
DYNLRB1	544.829	0.146386	0.152805	0.0582989	2.51096	0.0120404	0.275761
PARL	1648.51	-0.129516	-0.133868	0.0515785	-2.51104	0.0120376	0.275761
RP4-758J18.13	121.138	0.192772	0.20856	0.0768071	2.50982	0.0120794	0.275761
RPL3P9	35.0678	-0.204	-0.223013	0.0812986	-2.50927	0.0120981	0.275761
SSR1	5801.44	-0.119205	-0.122568	0.0475089	-2.5091	0.0121038	0.275761
TCAF2	58.1826	0.264759	0.313988	0.105423	2.5114	0.0120254	0.275761
RP11-386I14.4	259.565	-0.341664	-0.502345	0.136205	-2.50845	0.012126	0.275818
PNPT1	586.592	0.305759	0.397431	0.12199	2.50644	0.0121955	0.276948
AC079325.6	222.559	0.359354	0.629503	0.143413	2.50572	0.0122201	0.277055
P2RY6	39.7061	0.348359	1.06769	0.13909	2.50457	0.0122602	0.277514
PCED1A	208.853	-0.229152	-0.257798	0.0915448	-2.50316	0.0123089	0.277715
PPP3CB-AS1	195.722	-0.243503	-0.279171	0.0972691	-2.50339	0.0123009	0.277715
OTOF	265.461	0.220501	5.98287	0.0881296	2.50201	0.012349	0.27817
AC010468.1	293.119	-0.218677	-0.243077	0.08751	-2.49888	0.0124585	0.278394
FAM72A	49.5153	0.313361	0.417925	0.125351	2.49987	0.0124238	0.278394
HSPB1	49.2755	0.32712	0.458735	0.130899	2.49902	0.0124536	0.278394
RP11-521B24.3	20.8148	0.262302	0.310486	0.104949	2.49932	0.0124432	0.278394
RPL21P131	28.132	-0.225324	-0.252391	0.0901506	-2.49942	0.0124396	0.278394
PKNOX1	207.876	0.276388	0.335975	0.110699	2.49674	0.0125341	0.279635
GABARAP	121.139	-0.165111	-0.174692	0.0662898	-2.49074	0.0127478	0.282597
PLEKHO2	1469.33	0.20217	0.221046	0.0811536	2.49121	0.0127309	0.282597
RNU4-2	21.7039	-0.360186	-0.638233	0.14452	-2.49228	0.0126925	0.282597
RP11-796E2.4	63.3323	-0.334093	-0.478854	0.134105	-2.49128	0.0127285	0.282597
PDE4B	394.557	-0.334951	-0.482721	0.134577	-2.48893	0.0128129	0.282694
PLP2	2578.72	0.189574	0.204778	0.0761465	2.4896	0.0127888	0.282694
WDR54	65.7996	-0.340296	-0.503637	0.136705	-2.48927	0.0128005	0.282694
MT-TD	19.2024	0.305174	0.398267	0.122643	2.48832	0.0128349	0.282732
RP11-807C20.2	23.2291	0.357629	0.637065	0.143803	2.48693	0.012885	0.283389
BTN3A1	591.844	0.259278	0.306031	0.10433	2.48516	0.0129494	0.283777
PFN1P1	1252.97	0.106565	0.108995	0.0429149	2.48317	0.0130219	0.283777
PLXNA3	59.1275	0.231014	0.261437	0.0930347	2.4831	0.0130246	0.283777
RLIM	450.454	0.241861	0.277727	0.0973008	2.48571	0.0129294	0.283777
RPS3AP6	965.672	-0.213125	-0.235772	0.085797	-2.48406	0.0129892	0.283777
TGM2	58.9698	0.348271	1.02209	0.140179	2.48447	0.0129745	0.283777
LCP2	2264.15	0.170503	0.181304	0.0687656	2.47948	0.0131573	0.285777
MYL5	83.3544	-0.298822	-0.382221	0.120511	-2.47962	0.0131521	0.285777
L2HGDH	107.872	0.176855	0.189075	0.0713985	2.47701	0.0132488	0.287318
MYOF	494.968	0.319214	0.438909	0.128915	2.47616	0.0132802	0.287553
FOXD2-AS1	18.8233	0.316305	1.39821	0.1279	2.47307	0.0133959	0.288714
MRPL3	949.162	-0.18971	-0.20511	0.0766963	-2.47352	0.0133789	0.288714
ZCCHC10	465.746	-0.210445	-0.232357	0.0850896	-2.47322	0.0133903	0.288714
UQCRC2	2061.24	-0.128746	-0.133162	0.0520815	-2.47201	0.0134356	0.289124
DUX4L50	106.19	0.334384	0.497108	0.135807	2.4622	0.0138088	0.289191
GPATCH11	111.864	-0.327822	-0.46443	0.133049	-2.46392	0.0137426	0.289191
LRP1	2299.67	0.136462	0.14179	0.0552678	2.46911	0.0135449	0.289191
MLKL	1168.46	0.19945	0.217876	0.0807983	2.46849	0.0135684	0.289191
MT-ATP6	13773.2	-0.188019	-0.203098	0.0763008	-2.46418	0.0137327	0.289191
NUP210	578.552	0.213937	0.237451	0.086722	2.46693	0.0136279	0.289191
PA2G4	620.839	-0.147252	-0.154032	0.0596666	-2.46792	0.0135901	0.289191
PPBP	68.1557	0.318972	1.33899	0.129579	2.46159	0.0138321	0.289191
RCC2	267.642	0.246534	0.286054	0.100098	2.46293	0.0137808	0.289191
RETN	269.18	0.338754	0.516364	0.137477	2.46407	0.0137368	0.289191
RP5-828K20.1	17.48	-0.288587	-0.361936	0.117226	-2.46179	0.0138244	0.289191
SEC63	834.311	-0.201883	-0.220947	0.0817321	-2.47006	0.0135089	0.289191
SMAD1	100.474	0.342625	0.535389	0.138925	2.46626	0.0136533	0.289191
SNRPN	386.03	-0.266589	-0.318861	0.107929	-2.47005	0.0135095	0.289191
TICAM1	438.528	0.230955	0.261984	0.0937688	2.46303	0.013777	0.289191
TNIK	20.3213	0.324802	1.27093	0.131846	2.4635	0.0137587	0.289191
TRPM6	38.715	0.191573	0.207692	0.0776138	2.46829	0.0135761	0.289191
TXNIP	9727.7	-0.194452	-0.211251	0.0787489	-2.46927	0.0135389	0.289191
UBE2V2	1630.81	-0.151678	-0.159157	0.0615567	-2.46404	0.013738	0.289191
SH3BGRL	9594.46	-0.125476	-0.129591	0.0509971	-2.46045	0.0138763	0.289249
XPC	457.616	-0.227065	-0.256039	0.0922739	-2.46077	0.013864	0.289249
PRKCA	144.367	0.310608	0.418195	0.126552	2.45438	0.0141127	0.293737
COX17	473.493	0.178543	0.191434	0.0728003	2.4525	0.0141868	0.29484
FPR2	1592.19	0.278522	0.343753	0.113636	2.45099	0.0142462	0.295635
CYB5A	240.326	0.260348	0.309998	0.10633	2.44849	0.0143457	0.296834
KMT2E-AS1	126.111	-0.265377	-0.318014	0.108385	-2.44847	0.0143465	0.296834
BCL10	568.236	0.174394	0.186403	0.0713238	2.4451	0.014481	0.297414
MED1	379.01	-0.270161	-0.32689	0.110429	-2.44646	0.0144268	0.297414
RP11-673C5.1	342.537	-0.0899703	-0.0914583	0.0367853	-2.44582	0.0144522	0.297414
RPL5P1	137.64	-0.214225	-0.238157	0.0875466	-2.44698	0.0144057	0.297414
RPS3AP25	193.476	-0.212204	-0.235395	0.0867845	-2.44518	0.0144779	0.297414
BRD4	347.411	0.185734	0.200566	0.0760146	2.4434	0.0145497	0.297512
C17orf49	25.9692	0.214827	0.239223	0.0878925	2.4442	0.0145175	0.297512
PPDPF	344.324	0.241251	0.278484	0.0987304	2.44354	0.0145441	0.297512
TYSND1	223.256	-0.24738	-0.287833	0.101276	-2.44263	0.0145807	0.29771
ROCK1P1	63.2303	0.293125	0.376062	0.120063	2.44144	0.014629	0.297826
RP11-15G8.1	20.6143	0.255902	0.302767	0.104795	2.44194	0.0146086	0.297826
RBM3	2972.57	-0.18912	-0.204845	0.0774833	-2.44079	0.0146553	0.297927
IGHEP2	261.729	0.293514	0.377096	0.120303	2.43978	0.0146961	0.298322
RPL15	7043.44	-0.148782	-0.155975	0.0610128	-2.43853	0.0147472	0.298925
HDAC2	1050.71	-0.173892	-0.18587	0.0714526	-2.43366	0.0149469	0.302272
MIEN1	935.353	0.148667	0.155895	0.0611063	2.43293	0.0149773	0.302272
ROCK1	1819.3	0.153046	0.160978	0.0628945	2.43337	0.014959	0.302272
PYCARD	1935.07	0.122687	0.126623	0.0504423	2.43222	0.0150066	0.302427
FAM225A	24.6578	0.312271	1.34783	0.128591	2.42842	0.015165	0.302961
HP	889.774	0.352259	0.797501	0.144914	2.43082	0.0150649	0.302961
NDUFAF1	233.297	0.27463	0.33793	0.113088	2.42846	0.0151629	0.302961
PFN1	16962.8	0.0991796	0.101219	0.0408493	2.42794	0.0151849	0.302961
RP11-111F16.2	21.0156	-0.27753	-0.34221	0.114211	-2.42997	0.0151	0.302961
SCO2	808.534	0.309705	0.420298	0.12748	2.42943	0.0151227	0.302961
SMPD1	138.926	0.226072	0.25587	0.0930671	2.42913	0.0151351	0.302961
AC079922.3	26.0658	-0.351888	-0.734684	0.145016	-2.42654	0.0152438	0.302985
CCT6A	1595.45	-0.146405	-0.15331	0.0603269	-2.42686	0.01523	0.302985
SRP72	1143.33	-0.149692	-0.157113	0.0617067	-2.42587	0.0152718	0.302985
ST13	1010.91	-0.159776	-0.16893	0.0658643	-2.42584	0.0152729	0.302985
PRKAR2A	556.623	-0.19005	-0.206288	0.0783805	-2.42471	0.0153206	0.303069
U4	22.3463	-0.299536	-0.391087	0.12352	-2.425	0.0153086	0.303069
SRPK2	712.378	-0.166908	-0.177478	0.0688558	-2.42402	0.0153496	0.303215
BTG2	3215.6	-0.3218	-0.455075	0.132868	-2.42195	0.0154373	0.303658
MYLK3	42.409	0.197455	0.216104	0.0814965	2.42287	0.0153985	0.303658
SCARB1	383.365	-0.245724	-0.286104	0.101448	-2.42218	0.0154277	0.303658
ABHD10	414.502	-0.227771	-0.258448	0.0942074	-2.41776	0.0156163	0.305526
CNIH1	1297.16	-0.148169	-0.155407	0.0612984	-2.41717	0.0156416	0.305526
MTATP6P1	6436.74	-0.181137	-0.195049	0.0749001	-2.41837	0.01559	0.305526
RP11-468E2.4	111.84	0.303205	0.404457	0.125427	2.41738	0.0156328	0.305526
RPS4XP17	20.9786	-0.268555	-0.326092	0.111098	-2.41727	0.0156372	0.305526
WDR11	820.629	-0.208225	-0.230602	0.0861874	-2.41596	0.0156938	0.306117
DYNLT1	2967.8	0.213977	0.238845	0.0886598	2.41347	0.0158016	0.306987
HNRNPA1P54	86.2285	0.128341	0.132951	0.0531577	2.41434	0.0157637	0.306987
RP1-101G11.3	42.4476	0.171031	0.182645	0.070867	2.4134	0.0158043	0.306987
IL4I1	126.79	0.330475	0.499636	0.136968	2.41279	0.0158308	0.307074
FAM21FP	104.135	0.185521	0.200731	0.0769069	2.41228	0.0158532	0.307082
ARF6	4834.92	0.147184	0.154331	0.0610721	2.40999	0.0159528	0.307681
ATP1B3P1	24.3149	0.217052	0.243283	0.0900336	2.41079	0.015918	0.307681
ERI3	416.832	-0.168423	-0.179449	0.0698761	-2.41031	0.0159389	0.307681
PSMB9	3747.17	0.261609	0.314692	0.108572	2.40955	0.0159723	0.307681
EIF3LP3	28.1901	-0.244278	-0.284491	0.101536	-2.40584	0.0161354	0.309486
GRIPAP1	657.587	0.15788	0.166913	0.0657346	2.40178	0.0163154	0.309486
MYL12AP1	255.75	0.139025	0.145013	0.0578267	2.40417	0.0162091	0.309486
NKRF	46.6307	-0.332186	-0.502984	0.138239	-2.40299	0.0162616	0.309486
NR4A2	466.694	-0.341036	-0.55377	0.141927	-2.4029	0.0162657	0.309486
PIPSL	266.177	-0.108921	-0.111708	0.0453407	-2.40227	0.0162937	0.309486
RAE1	521.707	-0.186402	-0.20195	0.0775878	-2.40246	0.016285	0.309486
RP11-135N5.3	58.5894	0.316926	0.449562	0.131975	2.40141	0.0163319	0.309486
RP11-471B22.3	37.3451	-0.293633	-0.379394	0.122091	-2.40504	0.0161705	0.309486
SLC25A25	132.205	0.320755	0.46159	0.133276	2.4067	0.0160973	0.309486
SMS	912.863	-0.164225	-0.174458	0.0683659	-2.40215	0.0162991	0.309486
SSB	1205.13	0.222922	0.252051	0.0927882	2.40248	0.0162844	0.309486
AC105052.1	20.4795	-0.327991	-0.485083	0.136618	-2.40079	0.0163597	0.309553
LRP8	22.3813	0.323266	1.15007	0.134675	2.40034	0.0163797	0.309553
RPLP0	2610.99	-0.178565	-0.192101	0.0744781	-2.39755	0.016505	0.311278
SMIM10L1	455.54	-0.126602	-0.131078	0.0528099	-2.39732	0.0165156	0.311278
COPS3	990.64	-0.19521	-0.213508	0.0814858	-2.39563	0.016592	0.311456
RP11-553P9.1	89.7043	-0.182244	-0.196748	0.0760632	-2.39596	0.016577	0.311456
SPINT2	1248.03	-0.140502	-0.146731	0.058649	-2.39565	0.0165911	0.311456
IFIT5	443.106	0.326412	0.488725	0.136317	2.3945	0.016643	0.311995
CANX	4470.43	-0.14219	-0.148677	0.0594201	-2.39295	0.0167134	0.312895
CATSPER1	249.191	-0.243517	-0.283966	0.101851	-2.39092	0.0168063	0.313732
EMP3	10430	0.149703	0.157386	0.0626181	2.39073	0.016815	0.313732
LYPLA1	2018.89	-0.179431	-0.193282	0.07506	-2.3905	0.0168255	0.313732
CTB-129P6.7	46.736	0.175237	0.188093	0.0733209	2.39	0.0168482	0.313736
ZNF331	202.257	-0.29191	-0.377471	0.122172	-2.38934	0.0168788	0.313888
SLC35A1	1842.55	-0.169781	-0.181347	0.0711033	-2.3878	0.0169495	0.314365
TRANK1	142.973	0.329108	0.504366	0.137826	2.38785	0.0169471	0.314365
B2M	271112	0.13274	0.137994	0.0556193	2.38659	0.0170055	0.3144
CLECL1	44.8891	0.333379	0.992012	0.139734	2.38581	0.0170414	0.3144
LAMTOR3	998.275	0.186155	0.201954	0.0779964	2.38671	0.0169999	0.3144
MED24	205.824	0.283339	0.360299	0.118744	2.38613	0.017027	0.3144
ZC3H14	711.393	-0.164081	-0.174465	0.0688381	-2.38357	0.0171455	0.315902
GCH1	864.816	0.245874	0.288847	0.103222	2.382	0.017219	0.316838
AC008079.10	73.3407	0.199598	0.219794	0.08384	2.3807	0.0172796	0.317535
RAB6C	157.474	-0.154445	-0.163014	0.0649013	-2.37969	0.017327	0.317988
KIAA1586	169.686	-0.25871	-0.310638	0.10877	-2.3785	0.0173832	0.318401
PFKP	251.303	0.300149	0.402886	0.126206	2.37825	0.0173951	0.318401
RALA	474.725	0.19431	0.212809	0.0818169	2.37493	0.0175521	0.320613
ZNF702P	33.5158	-0.343773	-0.733813	0.144763	-2.37473	0.0175619	0.320613
SEMA4B	445.394	-0.253536	-0.301797	0.10684	-2.37303	0.0176426	0.321667
C11orf31	676.252	0.150568	0.158535	0.0634825	2.3718	0.0177016	0.322321
TMEM80	536.405	-0.204602	-0.226654	0.086285	-2.37123	0.0177289	0.322399
MRPL3P1	26.6698	-0.229636	-0.262951	0.0968989	-2.36985	0.0177953	0.322765
ZNF408	150.633	-0.295897	-0.389981	0.124857	-2.36988	0.0177937	0.322765
EXOSC2	168.047	-0.280158	-0.353524	0.118301	-2.36818	0.0178756	0.323802
ZNF880	71.4678	-0.30975	-0.429353	0.130847	-2.36726	0.0179201	0.324187
CPNE8	841.515	-0.215747	-0.242502	0.0912374	-2.36468	0.0180458	0.326039
EIF3E	1353.26	-0.14909	-0.15685	0.0630862	-2.36328	0.0181142	0.326508
MRPS11	199.901	0.176531	0.190072	0.0747156	2.36271	0.0181419	0.326508
PLD4	300.986	-0.306308	-0.419702	0.129621	-2.36311	0.0181224	0.326508
AKIRIN2	1468.13	0.18271	0.197958	0.07744	2.35937	0.018306	0.327824
MRPS34	992.167	-0.140556	-0.147006	0.0595752	-2.35931	0.018309	0.327824
SMC1A	1002.67	0.169842	0.181783	0.07197	2.3599	0.01828	0.327824
WIPF2	333.78	0.202657	0.224383	0.0858522	2.36053	0.0182487	0.327824
GLT8D1	583.009	-0.206515	-0.229622	0.0875934	-2.35765	0.0183909	0.328672
RP11-571E6.3	18.1992	0.207414	0.231054	0.0879883	2.35729	0.0184088	0.328672
TXNL4B	156.462	0.269674	0.334239	0.114418	2.35693	0.0184269	0.328672
CAPNS1	1484.69	0.148504	0.156248	0.0630684	2.35466	0.0185398	0.330264
GRAMD1B	75.6742	0.32985	0.527855	0.140176	2.35311	0.0186169	0.330794
TUBB6	178.297	0.320373	0.478416	0.136146	2.35316	0.0186146	0.330794
EEF1A1P33	45.8884	-0.188484	-0.20544	0.0801511	-2.35161	0.0186924	0.330873
MRPS5	1411.7	-0.140267	-0.146716	0.0596285	-2.35235	0.0186554	0.330873
SASH3	3253.27	0.148326	0.156061	0.0630679	2.35185	0.0186801	0.330873
CYB561A3	847.104	-0.177212	-0.191057	0.0754479	-2.3488	0.0188342	0.331037
HSD3B7	30.4515	0.336801	0.587981	0.143377	2.34906	0.018821	0.331037
KIAA1257	38.9662	-0.216654	-0.244247	0.0921898	-2.35008	0.0187692	0.331037
KIF9-AS1	19.3188	-0.34145	-0.686164	0.145306	-2.34987	0.0187802	0.331037
RXRA	346.575	0.183536	0.199194	0.0781468	2.3486	0.018844	0.331037
TIMP1	2986.58	0.192294	0.210594	0.0817974	2.35086	0.01873	0.331037
C19orf48	133.705	-0.299544	-0.404633	0.127981	-2.34054	0.0192557	0.331195
CALM1	8007.35	0.134758	0.14051	0.0575868	2.34008	0.0192798	0.331195
CPEB3	138.442	0.31101	0.445404	0.132873	2.34065	0.0192503	0.331195
DPH7	354.807	-0.218789	-0.247681	0.0934928	-2.34017	0.019275	0.331195
EIF4B	1044.11	-0.260819	-0.316688	0.111137	-2.34681	0.0189347	0.331195
EIF5AP4	136.765	-0.226049	-0.258395	0.0963865	-2.34524	0.0190151	0.331195
ELP3	355.277	-0.225276	-0.257341	0.0962019	-2.34169	0.0191964	0.331195
GPR107	230.957	0.261104	0.318568	0.111447	2.34286	0.0191367	0.331195
GPR132	144.905	0.270585	0.337298	0.115472	2.3433	0.0191141	0.331195
LL22NC03-86G7.1	226.504	0.185712	0.202027	0.0791244	2.34709	0.0189206	0.331195
PAAF1	277.451	-0.248958	-0.295729	0.106354	-2.34084	0.0192406	0.331195
PARP11	334.65	0.283424	0.365458	0.120871	2.34484	0.0190354	0.331195
PNP	321.431	0.267046	0.330355	0.114081	2.34085	0.0192398	0.331195
PRR13	4789.96	0.0749828	0.075912	0.0319659	2.34571	0.0189909	0.331195
PTK6	84.0348	0.241057	0.282827	0.102888	2.34291	0.0191341	0.331195
RP3-425C14.4	59.0938	0.340289	0.678364	0.145298	2.342	0.0191805	0.331195
SNORA70	78.3257	-0.233504	-0.269887	0.0994918	-2.34697	0.018927	0.331195
ZNF321P	25.7167	0.277402	0.352303	0.118516	2.34062	0.0192516	0.331195
FCER1G	17146.4	0.124531	0.129019	0.0532565	2.33833	0.0193702	0.332339
KIAA1109	590.778	0.211688	0.237692	0.0906037	2.33641	0.0194697	0.333636
DGUOK	749.797	0.132717	0.138218	0.0568167	2.33588	0.0194977	0.333707
RPL3	3636.2	-0.149281	-0.157301	0.0639916	-2.33282	0.0196575	0.33603
DDX27	612.28	-0.146224	-0.153743	0.0627422	-2.33055	0.0197771	0.33702
HSP90B2P	77.9802	-0.171432	-0.184052	0.0735412	-2.33109	0.0197484	0.33702
MAPK6	280.998	0.287934	0.37844	0.123558	2.33035	0.0197878	0.33702
RPL3P4	254.601	-0.172832	-0.185818	0.0741973	-2.32936	0.01984	0.337087
SMCHD1	1509.31	0.186898	0.203867	0.0802225	2.32974	0.0198197	0.337087
SLC1A3	59.8862	0.318825	1.0483	0.136905	2.3288	0.0198697	0.337181
SEPN1	99.7538	0.26715	0.331816	0.114799	2.32712	0.019959	0.338286
PSMB8	5030.04	0.161769	0.172283	0.0695501	2.32593	0.0200221	0.338944
METTL21B	94.365	-0.316518	-0.465454	0.136169	-2.32444	0.0201017	0.339879
ATF1	314.755	-0.207755	-0.232223	0.08941	-2.32362	0.0201458	0.340083
MVP	2939.6	0.151749	0.160306	0.0653159	2.32331	0.0201624	0.340083
C7orf49	323.644	-0.171451	-0.184187	0.0738308	-2.32222	0.0202211	0.34066
MTFMT	223.333	-0.196224	-0.216363	0.0845838	-2.31987	0.0203478	0.342382
DRAXIN	47.3882	0.211245	0.237704	0.0912504	2.315	0.0206127	0.346344
MAFF	96.0243	0.330534	0.859224	0.142802	2.31464	0.0206328	0.346344
RP11-278C7.1	23.1447	-0.274506	-0.34722	0.118624	-2.31408	0.0206634	0.34644
AC007879.5	19.7248	-0.306797	-0.433296	0.132736	-2.31133	0.0208148	0.346734
AFF3	50.277	-0.300975	-0.414604	0.130207	-2.31151	0.0208047	0.346734
AGAP4	36.5647	-0.230664	-0.266821	0.0997873	-2.31155	0.0208024	0.346734
APOL2	496.953	0.221024	0.252306	0.0956408	2.31099	0.0208336	0.346734
LINC01470	17.6364	0.238853	0.280793	0.10336	2.31088	0.0208395	0.346734
NAA15	415.44	-0.199141	-0.22052	0.0861446	-2.31171	0.0207938	0.346734
SERPINA10	27.1613	0.196658	0.217359	0.0851111	2.31061	0.0208547	0.346734
CFL1	9184.18	0.148884	0.15704	0.0644798	2.309	0.0209437	0.347277
GBP2	1755.04	0.261462	0.321981	0.113246	2.3088	0.0209549	0.347277
PLA2G4A	131.959	0.325275	0.528532	0.140893	2.30867	0.0209619	0.347277
DAPK3	236.128	0.194499	0.214431	0.0843194	2.30669	0.021072	0.348165
LIPT1	99.7187	-0.306925	-0.435158	0.133083	-2.30628	0.0210952	0.348165
PTGS2	393.537	-0.328614	-0.787677	0.142509	-2.30592	0.0211152	0.348165
SPTLC2	2397.9	0.188193	0.206001	0.0816098	2.30601	0.0211099	0.348165
ZNRF2	37.2467	0.307939	0.444886	0.133584	2.3052	0.0211551	0.348411
LRRC75A-AS1	1469.88	-0.215677	-0.244327	0.0937044	-2.30167	0.0213536	0.350853
RPA1	597.079	-0.227556	-0.262387	0.0988476	-2.30209	0.0213299	0.350853
PRR16	24.052	0.31887	0.987594	0.138578	2.30101	0.0213913	0.351058
KIF23	62.8052	0.334142	0.666636	0.145305	2.29959	0.0214717	0.351655
TRIM58	87.4026	0.327174	0.550976	0.142282	2.29948	0.021478	0.351655
AD000864.6	83.9417	-0.274851	-0.349532	0.119582	-2.29842	0.0215379	0.35181
RPL21P120	63.5521	-0.179789	-0.19506	0.0782116	-2.29875	0.0215192	0.35181
SNHG11	117.396	-0.272414	-0.344337	0.118558	-2.29773	0.0215772	0.352041
CHIC2	611.189	0.138096	0.144584	0.0601704	2.29508	0.0217288	0.352047
ENO1-IT1	19.5665	0.282607	0.370368	0.123115	2.29547	0.0217063	0.352047
MIR616	23.3361	-0.312921	-0.46102	0.136269	-2.29634	0.0216562	0.352047
RP11-398H6.1	124.295	0.168131	0.180447	0.0732313	2.29589	0.0216821	0.352047
RPS3AP44	19.0321	-0.244378	-0.290394	0.106463	-2.29544	0.0217082	0.352047
TIMM50	434.64	-0.157544	-0.167435	0.0685945	-2.29674	0.0216336	0.352047
RP11-705C15.2	196.404	-0.212563	-0.239964	0.0926356	-2.29462	0.0217551	0.352064
DUSP7	179.292	0.251974	0.305099	0.109948	2.29177	0.021919	0.354307
ATP13A1	1391.23	0.230307	0.267679	0.100554	2.29039	0.0219988	0.354776
YWHAZP5	180.15	0.143068	0.150371	0.0624595	2.29057	0.021988	0.354776
HDAC9	330.183	-0.309388	-0.449842	0.135273	-2.28713	0.0221882	0.354961
ITPKB	215.714	-0.23477	-0.274523	0.102539	-2.28957	0.0220462	0.354961
MPO	242.372	0.282196	0.370178	0.123305	2.2886	0.0221026	0.354961
NCKAP1	26.7717	0.198676	0.220601	0.0868642	2.2872	0.022184	0.354961
RP11-318K15.2	40.7635	0.286755	0.382111	0.125326	2.28807	0.0221336	0.354961
RP11-705O1.8	20.7303	-0.32765	-0.551845	0.143217	-2.28778	0.0221504	0.354961
RP5-1021I20.5	31.6194	0.227026	0.262474	0.0991681	2.28931	0.0220615	0.354961
TVP23C	130.327	0.22865	0.265221	0.100026	2.28591	0.0222594	0.355692
MRPS17P1	38.9953	0.160901	0.171662	0.0704116	2.28515	0.0223042	0.356
CTC-451P13.1	193.18	-0.207848	-0.233462	0.0910234	-2.28346	0.0224035	0.357106
TBC1D8	652.587	-0.201841	-0.224957	0.0884066	-2.2831	0.0224246	0.357106
NTMT1	168.212	-0.177919	-0.192924	0.0779465	-2.28258	0.022455	0.357183
EIF3M	1802.7	-0.094909	-0.0969373	0.0416235	-2.28018	0.022597	0.358053
KB-1125A3.12	74.6759	0.147105	0.155181	0.0645018	2.28063	0.0225701	0.358053
PTPRG-AS1	17.184	0.216691	0.246838	0.0950204	2.28047	0.0225797	0.358053
RPGRIP1L	17.1713	0.278035	0.361321	0.121949	2.27992	0.0226123	0.358053
COX6A1	812.643	0.143344	0.150777	0.0629133	2.27844	0.0227005	0.358637
PTER	331.069	-0.250533	-0.302489	0.109952	-2.27856	0.0226931	0.358637
CTD-2033A16.2	125.613	-0.167544	-0.1799	0.0735773	-2.27712	0.0227791	0.359459
SHFM1	1007.81	0.15771	0.167866	0.0692712	2.2767	0.022804	0.359459
NSUN3	172.406	0.272752	0.349311	0.119853	2.27572	0.022863	0.359982
GPALPP1	184.1	0.238067	0.281534	0.104828	2.27103	0.0231454	0.362601
KBTBD8	39.8455	0.297426	1.17812	0.131003	2.27037	0.0231851	0.362601
RTN1	1097.18	-0.283138	-0.372614	0.124642	-2.27161	0.0231098	0.362601
SLBP	1364.29	-0.126483	-0.131496	0.0556943	-2.27102	0.0231456	0.362601
TLR6	233.198	0.239468	0.283989	0.105455	2.27081	0.0231586	0.362601
TRAPPC6B	397.42	0.235896	0.277885	0.103887	2.27069	0.0231656	0.362601
ZNF33B	197.719	-0.264894	-0.331446	0.116837	-2.26722	0.023377	0.365194
CLK4	465.655	-0.228706	-0.265739	0.100895	-2.26677	0.0234042	0.365211
ARID5A	592.599	0.154277	0.163839	0.0681072	2.2652	0.0235002	0.365483
CTA-331P3.1	28.5068	0.311591	0.998698	0.137537	2.2655	0.0234818	0.365483
TPRA1	552.823	-0.16959	-0.182598	0.0748584	-2.26548	0.0234833	0.365483
HPR	148.277	0.328777	0.714812	0.145206	2.26421	0.023561	0.365615
OSBPL8	1560.42	-0.150064	-0.158781	0.0662675	-2.26452	0.0235421	0.365615
RHEB	1505	0.118055	0.122127	0.0521764	2.26262	0.0236592	0.366731
TXNRD2	422.52	-0.20635	-0.231939	0.091229	-2.26189	0.0237044	0.367025
TRAPPC11	865.404	-0.17397	-0.188207	0.0769546	-2.26068	0.0237791	0.367773
BBIP1	159.175	0.164741	0.176715	0.0729976	2.2568	0.0240208	0.368481
CD72	23.067	0.307922	1.02574	0.136419	2.25718	0.0239969	0.368481
CTD-2647E9.3	26.6012	0.321539	0.543262	0.14239	2.25815	0.0239361	0.368481
FAS	625.034	0.239919	0.285613	0.106321	2.25655	0.024036	0.368481
RP11-1217F2.1	57.264	0.197643	0.219894	0.0875412	2.25771	0.0239637	0.368481
ZNF253	29.8809	-0.327989	-0.654187	0.145339	-2.25672	0.0240257	0.368481
ZNF254	82.2369	-0.31851	-0.507259	0.141035	-2.25838	0.0239221	0.368481
ZZZ3	299.278	-0.251868	-0.306339	0.111474	-2.25943	0.0238569	0.368481
AMZ2P1	377.455	-0.189125	-0.208189	0.0839478	-2.25288	0.0242665	0.369581
ANAPC15	349.887	-0.132366	-0.138255	0.0587321	-2.25372	0.0242139	0.369581
EEF1A1P29	70.8057	-0.178433	-0.194044	0.0791998	-2.25295	0.0242626	0.369581
LINC01004	25.601	-0.316729	-0.498904	0.140505	-2.25422	0.0241824	0.369581
PDE6A	44.3402	0.206639	0.232793	0.0916409	2.25488	0.0241412	0.369581
SP110	141.049	0.242409	0.290201	0.107544	2.25406	0.0241925	0.369581
LINC01088	20.6256	0.218004	0.250052	0.0968212	2.25162	0.0243465	0.370144
WNT7B	20.3549	0.225631	0.261924	0.100215	2.25146	0.0243564	0.370144
GFPT1	202.257	-0.287093	-0.386492	0.127543	-2.25096	0.0243883	0.370226
STAM	225.356	-0.241185	-0.287589	0.107217	-2.24951	0.0244802	0.371216
BPI	148.733	0.325641	0.611244	0.144797	2.24895	0.0245159	0.371355
DCTN6	301.92	0.213733	0.243571	0.0951538	2.24618	0.0246923	0.371609
PTGES2-AS1	27.0043	0.225815	0.262493	0.100515	2.24659	0.0246663	0.371609
RP11-153M7.3	182.665	0.266736	0.33903	0.118689	2.24735	0.0246175	0.371609
RP11-20D14.6	69.9027	0.277322	0.36416	0.123421	2.24696	0.0246427	0.371609
WAC	1346.23	-0.128945	-0.134392	0.0573537	-2.24825	0.0245604	0.371609
ZYX	9988.61	0.139853	0.146931	0.0622257	2.2475	0.0246079	0.371609
DDX28	415.341	-0.228137	-0.265777	0.101587	-2.24573	0.0247211	0.371642
PEBP1P3	28.388	0.309373	0.474489	0.137875	2.24387	0.0248409	0.373041
UBE2E2	1022.55	-0.140859	-0.148118	0.0628024	-2.24289	0.0249039	0.373585
API5	1350.34	-0.16723	-0.179949	0.0745811	-2.24226	0.0249446	0.373794
FAM127B	275.559	0.176447	0.191761	0.0787218	2.2414	0.0249999	0.373821
NOTCH4	57.5605	-0.301998	-0.436293	0.134735	-2.24142	0.0249991	0.373821
CTA-305I2.1	16.9675	0.323841	0.599899	0.144606	2.23947	0.0251254	0.374947
TMEM245	275.379	-0.239596	-0.285418	0.106991	-2.23942	0.0251289	0.374947
EMP2	44.6845	0.173984	0.188654	0.0777402	2.23802	0.0252197	0.3759
BLNK	29.6682	0.286002	1.24282	0.127826	2.23743	0.0252583	0.376074
CASC4	1230.42	-0.159112	-0.169964	0.0711333	-2.23682	0.0252982	0.376266
KMO	194.217	0.292591	0.41011	0.130934	2.23465	0.0254402	0.376425
MPDU1	674.504	-0.138272	-0.145168	0.0618776	-2.2346	0.0254436	0.376425
RP11-804F13.2	24.4382	-0.2085	-0.235885	0.0932695	-2.23546	0.025387	0.376425
RYR1	20.0846	-0.278704	-1.06264	0.124643	-2.23603	0.0253498	0.376425
SFSWAP	403.907	-0.16219	-0.173768	0.0725575	-2.23533	0.0253955	0.376425
RP11-290D2.6	17.2676	-0.308991	-0.468727	0.138301	-2.23419	0.0254709	0.37643
MICAL1	1144.61	0.16308	0.174939	0.0730247	2.23322	0.0255343	0.376968
RP11-640N11.2	21.662	0.190514	0.210621	0.0853499	2.23216	0.0256045	0.377606
POLE3	1161.54	-0.14801	-0.156636	0.0663597	-2.23042	0.0257192	0.378898
AKAP13	3339.53	0.102244	0.10493	0.0459087	2.22711	0.0259398	0.379017
FAM206A	806.294	-0.181834	-0.19895	0.0816194	-2.22782	0.0258923	0.379017
HSD17B8	42.8592	-0.323005	-0.589378	0.144947	-2.22843	0.0258519	0.379017
LUC7L2	290.178	-0.152946	-0.162575	0.0686661	-2.22739	0.0259209	0.379017
MYL12BP2	106.58	0.13808	0.145009	0.0620013	2.22704	0.0259444	0.379017
PRKD2	277.313	0.240919	0.28924	0.108176	2.2271	0.0259409	0.379017
TIRAP	57.0846	0.277484	0.367172	0.124477	2.22921	0.0258002	0.379017
ZNF778	73.9969	-0.285392	-0.385731	0.12803	-2.2291	0.0258074	0.379017
TRAPPC5	77.5009	0.155153	0.165296	0.0697036	2.2259	0.0260211	0.379739
IMMT	859.437	-0.16292	-0.174811	0.0732648	-2.22372	0.0261675	0.38108
KIAA0930	451.228	0.18755	0.206776	0.0843283	2.22405	0.0261453	0.38108
DBP	175.012	-0.239358	-0.286074	0.107731	-2.22182	0.0262957	0.382548
OGFR	1194.7	0.169984	0.183788	0.0765557	2.2204	0.0263915	0.382745
PLEC	1144.69	0.155511	0.165781	0.0700357	2.22045	0.026388	0.382745
SH3KBP1	2232	-0.0909351	-0.0928137	0.0409495	-2.22067	0.0263736	0.382745
AC008984.2	26.1595	0.293175	0.417208	0.132234	2.21709	0.026617	0.38323
HMGB1P4	24.6784	-0.180852	-0.197829	0.0814996	-2.21905	0.026483	0.38323
ICAM2	589.076	0.175956	0.191512	0.0793444	2.21762	0.0265807	0.38323
NRG1	495.767	0.315974	0.534801	0.142468	2.21786	0.0265643	0.38323
PDE4DIP	315.503	-0.228112	-0.267007	0.102785	-2.21931	0.0264658	0.38323
RTP4	100.246	0.32173	0.62024	0.145092	2.21742	0.0265943	0.38323
SSR2	3096.39	-0.0987788	-0.101211	0.0445336	-2.21807	0.0265498	0.38323
SCARB2	1003.83	0.201241	0.226086	0.0907932	2.21648	0.0266589	0.383439
CDC73	950.634	-0.177869	-0.193963	0.0802818	-2.21556	0.026722	0.38395
AL591893.1	32.6299	0.238569	0.286282	0.108008	2.2088	0.0271885	0.386668
ARHGEF39	25.9151	0.293821	0.421484	0.133056	2.20825	0.0272267	0.386668
BCL6	1291.26	0.235534	0.280791	0.106643	2.20861	0.0272017	0.386668
COX6A1P2	175.301	0.145402	0.153721	0.0657586	2.21114	0.0270259	0.386668
CTD-3184A7.4	105.864	-0.247202	-0.301351	0.111928	-2.20858	0.0272037	0.386668
FKBP1B	80.7973	0.30487	0.467213	0.13788	2.21113	0.0270267	0.386668
H3F3C	2271.14	0.12517	0.130317	0.0566052	2.21128	0.0270164	0.386668
KIF1B	412.76	0.221419	0.257032	0.100246	2.20876	0.0271915	0.386668
MRPL28	797.203	0.131811	0.137887	0.0596455	2.2099	0.027112	0.386668
RIN2	1236.91	0.222326	0.25855	0.100709	2.20762	0.0272711	0.386668
RP11-284F21.8	18.6509	0.224133	0.261572	0.10151	2.20799	0.0272451	0.386668
RP11-4B16.4	197.688	-0.227445	-0.266248	0.102808	-2.21233	0.0269437	0.386668
SNORA70G	24.5282	0.292737	0.417668	0.13256	2.20834	0.0272205	0.386668
SECTM1	1009.57	0.232721	0.275992	0.105466	2.20661	0.0273415	0.387273
GPS2P1	55.8318	0.270136	0.352223	0.122496	2.20526	0.0274362	0.38822
ARL4A	1044.88	0.309265	0.497796	0.140492	2.20131	0.0277142	0.391387
RP11-44M6.7	162.948	0.147334	0.156121	0.0669411	2.20096	0.0277392	0.391387
ZMYM6	213.509	-0.209347	-0.238286	0.0951193	-2.20089	0.027744	0.391387
AP003774.4	90.7782	-0.303183	-0.456336	0.137809	-2.20002	0.0278052	0.391854
RP11-43N16.4	26.8884	0.300087	0.450293	0.136467	2.19897	0.0278798	0.39251
MRM2	499.686	-0.167491	-0.180887	0.0762084	-2.1978	0.0279632	0.393225
RP3-402G11.26	21.9355	-0.303507	-0.459011	0.138117	-2.19747	0.0279869	0.393225
HUWE1	491.892	0.178363	0.195053	0.08124	2.1955	0.0281277	0.394239
LYPLA2P2	19.0791	0.185038	0.204013	0.0843042	2.19488	0.0281721	0.394239
MBOAT2	153.084	-0.283967	-0.388104	0.129314	-2.19595	0.0280956	0.394239
SNED1	19.3611	-0.316645	-0.70103	0.144246	-2.19517	0.0281512	0.394239
TRIM21	1720.33	0.234702	0.28023	0.10699	2.19367	0.0282591	0.395061
FAM127A	417.365	0.133087	0.139461	0.0606997	2.19254	0.0283405	0.395803
AC005795.1	323.171	0.114379	0.118327	0.0521974	2.19128	0.0284318	0.396682
EIF5AP2	62.5223	0.169725	0.183913	0.077527	2.18924	0.0285795	0.398156
SSFA2	861.969	0.166635	0.179985	0.0761227	2.18903	0.0285945	0.398156
IKBKE	953.001	0.199094	0.223839	0.0910306	2.18711	0.0287343	0.399273
JARID2	600.992	0.168735	0.182703	0.0771764	2.18635	0.0287899	0.399273
LY96	735.802	0.187825	0.208003	0.085938	2.18558	0.0288462	0.399273
PLCXD1	111.679	0.225129	0.264152	0.10292	2.18743	0.0287112	0.399273
SSR4	1387.8	0.119632	0.1242	0.0547113	2.1866	0.0287719	0.399273
TRIM72	85.539	0.155261	0.165865	0.0710314	2.18581	0.0288296	0.399273
NPRL3	316.363	-0.225588	-0.264526	0.103239	-2.18511	0.0288811	0.399359
PIK3CD-AS1	33.382	0.317287	0.685311	0.145237	2.18462	0.0289169	0.39946
EEF1A1P6	3384.36	-0.158041	-0.169258	0.0723801	-2.18349	0.0289997	0.400207
AC025171.1	37.1522	0.294165	0.431106	0.134783	2.18251	0.0290718	0.40041
MIR548XHG	19.448	0.226477	0.266674	0.10376	2.18271	0.0290573	0.40041
SLC8B1	779.545	-0.183754	-0.202414	0.0842143	-2.18198	0.0291108	0.400553
YIPF4	979.745	0.169067	0.183208	0.0775275	2.18073	0.0292031	0.401427
STX4	461.297	0.174003	0.189616	0.079843	2.17932	0.029308	0.402473
BCL7A	20.7321	-0.315214	-0.565425	0.144677	-2.17875	0.0293506	0.402662
ADPGK-AS1	76.336	-0.242745	-0.295532	0.111674	-2.17371	0.0297272	0.403001
CATIP-AS1	39.2985	-0.289491	-0.410269	0.133006	-2.17652	0.0295163	0.403001
CCT2	687.57	-0.163567	-0.176265	0.0752417	-2.17389	0.0297135	0.403001
DMAP1	355.836	0.171338	0.186188	0.0786794	2.17767	0.0294305	0.403001
EEF1A1P4	279.289	-0.162522	-0.174943	0.0747455	-2.17434	0.0296799	0.403001
EFR3A	992.842	0.185089	0.204469	0.0850614	2.17595	0.029559	0.403001
FAM228B	53.6139	-0.226685	-0.266854	0.10419	-2.17568	0.0295789	0.403001
LINC00630	23.2049	-0.314512	-0.564657	0.14471	-2.1734	0.0297504	0.403001
PGAP1	39.4598	0.312569	0.770021	0.143732	2.17466	0.0296553	0.403001
RP11-549J18.1	22.6153	0.313	0.558621	0.143922	2.17479	0.0296455	0.403001
RP11-556N4.1	17.3721	0.219164	0.254994	0.100751	2.17531	0.029607	0.403001
SNX33	133.866	-0.26881	-0.351184	0.123605	-2.17475	0.0296487	0.403001
TUBB2A	40.5216	0.306699	0.500133	0.141077	2.17398	0.0297066	0.403001
ARF4	2523.53	0.105572	0.108699	0.0485866	2.17286	0.0297909	0.403158
AC005082.12	100.281	-0.313456	-0.688801	0.144376	-2.17111	0.0299225	0.404548
HLA-E	22468.7	0.126539	0.132088	0.0583045	2.17032	0.0299828	0.40458
2018-09-06	603.625	0.159817	0.171662	0.0736262	2.17065	0.0299578	0.40458
RP11-81A1.6	172.72	0.230377	0.274093	0.106198	2.16932	0.0300585	0.40521
C3orf33	26.6001	-0.305226	-0.484284	0.140841	-2.16716	0.0302226	0.405465
DOCK8	3234.97	0.142975	0.151217	0.0659667	2.16738	0.0302059	0.405465
EEF1A1P9	749.781	-0.158255	-0.169717	0.0730231	-2.16719	0.0302202	0.405465
MGEA5	1291.99	0.154897	0.165602	0.0714396	2.16822	0.030142	0.405465
SULT1B1	686.945	0.195897	0.21977	0.0903399	2.16844	0.0301253	0.405465
EIF4BP3	33.8977	-0.253415	-0.317332	0.116956	-2.16675	0.0302543	0.4055
ATXN7	242.558	0.207323	0.236753	0.0957478	2.16531	0.0303642	0.406583
TYW3	132.096	-0.276101	-0.371715	0.12755	-2.16466	0.0304139	0.406686
ZNF213-AS1	75.0454	-0.256689	-0.324532	0.118593	-2.16445	0.0304301	0.406686
ABCB7	390.509	-0.201396	-0.227693	0.0930791	-2.1637	0.030487	0.407057
RPL4	3801.23	-0.113082	-0.116995	0.0522887	-2.16265	0.0305682	0.407752
C2orf47	108.186	0.265855	0.348073	0.123057	2.16041	0.0307408	0.408882
IL4R	615.667	-0.200595	-0.22662	0.0928447	-2.16054	0.0307306	0.408882
PRRC2C	1332.74	0.117031	0.121404	0.0541565	2.16098	0.0306972	0.408882
PHF7	59.7225	0.302914	0.486221	0.14038	2.15782	0.0309416	0.411161
CD55	4309.66	0.200007	0.226089	0.0927333	2.1568	0.0310216	0.411833
AF111168.1	29.1754	0.203141	0.230739	0.0942452	2.15545	0.0311264	0.41209
BAX	406.411	0.152707	0.163062	0.070848	2.15541	0.0311295	0.41209
PSMA6	300.143	0.123527	0.128746	0.0573099	2.15543	0.0311283	0.41209
ALDH1A1	1322.32	-0.226912	-0.268552	0.105476	-2.15132	0.0314508	0.412577
ANKRD44-IT1	26.4841	0.311739	0.58187	0.144727	2.15398	0.0312421	0.412577
GPCPD1	3625.54	0.144217	0.15283	0.0670078	2.15224	0.0313784	0.412577
HBB	1285.35	0.238492	1.70256	0.110825	2.15197	0.0314001	0.412577
MT-CO3	35308.1	-0.200279	-0.226386	0.0930121	-2.15326	0.0312982	0.412577
NFE2	2714.11	0.232153	0.27826	0.107837	2.15283	0.0313324	0.412577
PSMC5	1581.65	-0.101235	-0.10403	0.0470193	-2.15305	0.0313151	0.412577
RAB12	196.02	0.23479	0.283134	0.109113	2.15182	0.0314116	0.412577
TBC1D14	538.727	-0.207403	-0.23708	0.0963786	-2.15196	0.0314007	0.412577
ZNF366	52.7056	0.312695	0.652549	0.145359	2.15118	0.0314617	0.412577
ARHGAP17	1526.89	0.184997	0.204944	0.086069	2.1494	0.0316028	0.414038
FAM225B	18.5256	0.269192	1.2531	0.12527	2.1489	0.0316426	0.414171
USP13	35.2148	0.309761	0.559478	0.144182	2.1484	0.0316819	0.414297
ENAH	47.6589	0.193688	0.217225	0.0901875	2.14761	0.0317445	0.414349
PNRC2P1	80.304	0.178861	0.196652	0.0832841	2.1476	0.0317452	0.414349
SUMF2	530.143	-0.175177	-0.191658	0.0816037	-2.14668	0.0318188	0.414922
GPKOW	289.473	0.215877	0.250934	0.100582	2.14627	0.0318516	0.414962
ACTL6A	373.745	-0.244104	-0.300402	0.113777	-2.14546	0.0319161	0.415385
ELAC2	631.699	0.191455	0.214073	0.0892516	2.14512	0.0319436	0.415385
RPL4P5	308.789	-0.127391	-0.133203	0.0594333	-2.14342	0.0320793	0.416375
SEC16A	505.727	0.178232	0.195877	0.0831444	2.14364	0.0320617	0.416375
INSIG1	716.37	0.275921	0.378635	0.128776	2.14264	0.0321423	0.416559
PHLDA1	38.7551	0.311332	0.62098	0.145313	2.1425	0.0321532	0.416559
BLZF1	329.843	0.262538	0.342491	0.122572	2.1419	0.0322012	0.416795
MPZL2	240.279	-0.267909	-0.354083	0.125194	-2.13994	0.0323594	0.418067
MTHFD2	425.3	0.200768	0.227759	0.0938156	2.14003	0.0323523	0.418067
FBXW11	736.541	-0.175024	-0.191607	0.0818329	-2.1388	0.0324517	0.418555
SCD5	50.5249	0.233535	0.281759	0.109193	2.13874	0.0324571	0.418555
ZNF398	132.714	-0.304136	-0.498713	0.142266	-2.1378	0.0325328	0.419145
RP1-78O14.1	50.4658	0.155136	0.166243	0.0726013	2.13682	0.0326124	0.419783
ATG12	721.357	0.134829	0.141879	0.0631476	2.13514	0.0327492	0.419996
GPR84	95.8473	0.310403	0.650077	0.145352	2.13552	0.0327184	0.419996
LINC01220	39.0061	-0.309317	-0.559636	0.144825	-2.13579	0.0326963	0.419996
MOSPD1	174.144	-0.247	-0.307111	0.115678	-2.13523	0.032742	0.419996
FDX1P1	24.195	0.1971	0.222493	0.0923467	2.13435	0.0328141	0.420443
TMEM220	45.2765	-0.30669	-0.526561	0.143748	-2.13353	0.0328816	0.420834
VRK2	604.06	0.228695	0.273319	0.107205	2.13324	0.0329049	0.420834
PSME2P2	167.092	0.234605	0.284139	0.110023	2.13233	0.0329799	0.421406
ACP1	1410.03	-0.108332	-0.111877	0.0509329	-2.12696	0.033423	0.421533
AP2B1	530.681	0.215745	0.251548	0.10138	2.12808	0.0333303	0.421533
ARSB	832.784	0.150789	0.160996	0.0708022	2.12972	0.0331949	0.421533
CCDC85C	22.5519	0.304444	0.526275	0.143128	2.12707	0.0334145	0.421533
CD2AP	214.909	0.282754	0.404197	0.132765	2.12974	0.0331934	0.421533
COQ4	296.196	-0.18641	-0.207207	0.0874868	-2.13072	0.0331121	0.421533
FUOM	221.661	-0.208061	-0.238921	0.0976886	-2.12984	0.0331852	0.421533
KLHDC2	516.911	-0.153086	-0.163812	0.0719734	-2.12698	0.033422	0.421533
LYSMD2	960.032	0.210882	0.243658	0.0990174	2.12974	0.0331929	0.421533
MCC	25.8776	0.308588	0.684124	0.145055	2.1274	0.0333872	0.421533
MFSD13A	304.59	0.214498	0.249466	0.100731	2.12942	0.0332193	0.421533
MRPL55	728.426	-0.130878	-0.137314	0.0614809	-2.12875	0.0332747	0.421533
NDUFB5	1149.42	-0.134401	-0.141424	0.0631959	-2.12673	0.0334425	0.421533
RPL4P4	496.842	-0.122635	-0.127875	0.0576615	-2.12681	0.0334358	0.421533
ZMPSTE24	874.926	-0.171646	-0.187371	0.0807033	-2.12687	0.0334307	0.421533
RP11-234N17.1	41.3115	-0.210449	-0.242782	0.0989775	-2.12623	0.0334841	0.421676
IFI30	60750.6	0.106236	0.109578	0.0499803	2.12556	0.0335395	0.421994
SLC39A9	578.225	-0.213737	-0.248059	0.100585	-2.12493	0.0335923	0.422278
AIDA	339.352	0.201518	0.229414	0.0948553	2.12448	0.03363	0.422371
SRGAP2D	61.3011	0.220792	0.260203	0.103967	2.12368	0.0336968	0.42245
WDR75	183.151	-0.274349	-0.374576	0.129182	-2.12373	0.0336924	0.42245
AC000089.3	84.569	-0.161253	-0.174084	0.0760556	-2.1202	0.0339894	0.422584
ANKS4B	27.7225	0.198193	0.224647	0.0935134	2.11941	0.0340562	0.422584
ARNTL2	50.2508	0.283572	0.410799	0.133907	2.11768	0.034202	0.422584
BLOC1S2P1	17.6868	0.196131	0.221607	0.0926069	2.11789	0.0341843	0.422584
CAHM	43.0921	-0.269119	-0.360834	0.127046	-2.11829	0.0341506	0.422584
CALML4	191.236	0.178806	0.197193	0.0844286	2.11783	0.0341891	0.422584
EEF1A1	16425	-0.15321	-0.164021	0.0721974	-2.1221	0.0338297	0.422584
LINC00674	101.517	0.218949	0.2572	0.1032	2.1216	0.0338712	0.422584
LINC00900	30.179	0.307627	0.616402	0.145331	2.11673	0.0342823	0.422584
LRRC57	469.107	0.149829	0.159937	0.070699	2.11925	0.0340691	0.422584
OSBPL3	197.703	0.279122	0.394764	0.131807	2.11766	0.034204	0.422584
PDIK1L	173.879	-0.288698	-0.424847	0.136178	-2.12	0.0340057	0.422584
RFXANK	264.119	0.189841	0.212539	0.0896676	2.11717	0.0342457	0.422584
RNF181	1571.4	0.118246	0.12295	0.0557571	2.12073	0.0339446	0.422584
RP11-34P13.13	91.9443	0.236378	0.288416	0.111515	2.1197	0.0340317	0.422584
SELL	17960	0.227504	0.271962	0.10726	2.12104	0.0339181	0.422584
STAT3	3095.16	0.141569	0.149987	0.0668782	2.11681	0.0342759	0.422584
TMEM18	272.335	-0.236357	-0.287508	0.111489	-2.12001	0.0340053	0.422584
UBE2G2	1015.01	-0.128733	-0.134909	0.0607854	-2.11783	0.0341895	0.422584
GTF2IRD1	18.1411	0.205368	0.235609	0.097057	2.11595	0.0343489	0.422806
PTGIR	419.544	-0.224642	-0.266668	0.106173	-2.11581	0.034361	0.422806
ABCC9	190.381	0.146796	0.156297	0.069416	2.11472	0.0344535	0.423156
RP3-467N11.2	48.4146	0.173216	0.189783	0.0819216	2.11441	0.0344803	0.423156
SPATS2	93.6281	0.238121	0.292207	0.112599	2.11478	0.0344486	0.423156
MYL8P	155.882	0.1135	0.117661	0.053695	2.11379	0.034533	0.423431
IARS2	1170.23	-0.171109	-0.186912	0.0809726	-2.11317	0.0345863	0.423607
MT-TN	77.4346	-0.191434	-0.214793	0.0906322	-2.11221	0.0346686	0.423607
RFC2	588.417	-0.156278	-0.167946	0.0739826	-2.11237	0.0346551	0.423607
RPL5P3	35.9547	-0.198617	-0.225211	0.0940214	-2.11247	0.0346461	0.423607
FADD	85.1935	0.256241	0.331527	0.121421	2.11035	0.0348282	0.424072
RITA1	209.622	-0.216312	-0.25288	0.102474	-2.11089	0.0347817	0.424072
SLC39A13	220.628	0.20051	0.228381	0.0949942	2.11076	0.034793	0.424072
ZNF862	82.8328	-0.299758	-0.488721	0.142032	-2.11049	0.0348162	0.424072
ZDHHC7	2833.05	-0.146847	-0.156393	0.0696506	-2.10834	0.0350016	0.425812
CTC-242N15.1	69.8022	0.17461	0.191762	0.0828664	2.10713	0.0351067	0.426719
ASCC2	1255.44	-0.128913	-0.13519	0.0612062	-2.1062	0.0351869	0.427169
FAHD1	222.553	-0.233608	-0.283402	0.110926	-2.10597	0.0352066	0.427169
PSPC1P1	49.2267	0.207794	0.2398	0.0986844	2.10564	0.0352354	0.427169
ACOT9	1182.38	0.129681	0.136107	0.0616359	2.10398	0.0353803	0.427263
ATF4P4	59.6443	0.191903	0.215868	0.091199	2.10423	0.0353588	0.427263
EEF1A1P5	3942.73	-0.150231	-0.160589	0.0714734	-2.10191	0.0355613	0.427263
EIF5A	2988.01	-0.158913	-0.171391	0.075601	-2.102	0.0355534	0.427263
RPL5P23	49.6426	-0.208846	-0.241258	0.0993701	-2.1017	0.0355797	0.427263
SBNO2	290.111	0.199792	0.22758	0.0950306	2.1024	0.0355182	0.427263
SESN3	196.552	-0.24105	-0.29788	0.114551	-2.1043	0.0353523	0.427263
SFT2D1	1411.39	0.119912	0.124921	0.0570228	2.10288	0.0354759	0.427263
SH3BP2	2915.92	0.114888	0.119265	0.0546499	2.10226	0.0355309	0.427263
ST6GAL2	18.2772	0.24444	0.306114	0.116174	2.10408	0.0353714	0.427263
ZNF211	396.933	-0.216322	-0.253337	0.102901	-2.10224	0.0355325	0.427263
DDX55	271.49	-0.194553	-0.219623	0.0925909	-2.10121	0.0356224	0.427408
SEC13	1577.77	-0.0905519	-0.0926356	0.0431185	-2.10007	0.0357229	0.428245
AC007386.2	20.9122	0.201191	0.229977	0.0958646	2.0987	0.0358434	0.42848
EEF1A1P10	59.6173	-0.195087	-0.220449	0.0929407	-2.09905	0.0358125	0.42848
SERPINB6	2096.9	-0.124609	-0.130283	0.0593644	-2.09905	0.0358127	0.42848
SLC39A4	98.5421	-0.262907	-0.347731	0.125286	-2.09845	0.0358652	0.42848
CSPP1	161.269	-0.240699	-0.297829	0.114792	-2.09683	0.0360088	0.429829
EZR	3335.03	0.172877	0.189658	0.0824788	2.09601	0.036081	0.429837
GBP4	896.57	0.294695	0.474873	0.140571	2.09641	0.0360456	0.429837
SP1	383.346	0.213307	0.249098	0.101779	2.09578	0.0361019	0.429837
FGFR1	40.6066	-0.303195	-0.652328	0.144705	-2.09526	0.0361475	0.430013
CLINT1	1708.54	-0.136796	-0.144487	0.0653058	-2.09469	0.0361982	0.43025
KIAA0101	24.522	0.17664	0.194771	0.0843414	2.09434	0.0362297	0.430259
RP11-1228E12.1	25.6484	0.259629	0.342621	0.124033	2.09323	0.0363286	0.431067
CTD-2246P4.1	28.8093	0.169069	0.184729	0.0808774	2.09044	0.0365784	0.432841
CTD-3092A11.1	110.821	-0.189195	-0.212198	0.0905101	-2.09032	0.0365889	0.432841
SNAI1	16.93	-0.257933	-1.01559	0.123364	-2.09084	0.0365427	0.432841
STK40	907.813	0.171063	0.187357	0.0818415	2.09017	0.0366022	0.432841
STAC3	95.011	0.241153	0.300464	0.115398	2.08976	0.0366394	0.432915
RPF2	240.995	-0.183639	-0.20437	0.0879059	-2.08904	0.0367044	0.433317
ABCB6	20.4085	0.251916	1.3276	0.120765	2.086	0.0369787	0.433521
FLCN	270.857	0.194672	0.220431	0.0932646	2.08731	0.0368606	0.433521
HGSNAT	857.341	-0.188514	-0.211357	0.0904028	-2.08527	0.037045	0.433521
LINC01003	208.442	0.215468	0.25307	0.103178	2.08832	0.0367689	0.433521
MID1IP1	520.937	-0.18592	-0.207681	0.0891672	-2.08507	0.0370632	0.433521
NTSR1	43.8855	0.275761	1.04449	0.132091	2.08766	0.0368288	0.433521
SLC11A1	4145.46	0.152579	0.163711	0.073138	2.08618	0.0369627	0.433521
SNORD3B-2	65.1723	-0.300001	-0.516272	0.143815	-2.08602	0.0369772	0.433521
VDAC1P2	19.3787	-0.191398	-0.215485	0.0917772	-2.08546	0.0370275	0.433521
YME1L1	2056.35	0.128753	0.135154	0.0617278	2.08582	0.036995	0.433521
ZBTB8A	93.1866	0.137595	0.145534	0.0659818	2.08534	0.0370383	0.433521
ARL2BP	79.9374	-0.167087	-0.182174	0.0802049	-2.08326	0.0372279	0.433639
ATRN	1600.8	-0.191197	-0.215248	0.0917299	-2.08435	0.0371281	0.433639
EEF1A1P19	822.275	-0.147904	-0.157947	0.070997	-2.08325	0.0372285	0.433639
SNRPCP14	18.3925	0.19133	0.215654	0.0918324	2.08346	0.0372089	0.433639
TDP1	196.711	-0.269621	-0.368911	0.129406	-2.08352	0.0372035	0.433639
AL162151.3	85.5834	-0.146603	-0.15636	0.0703894	-2.08274	0.0372751	0.43382
RABGAP1L	1283.42	0.178398	0.197409	0.08567	2.08239	0.0373073	0.433833
GBAS	2787.81	-0.116565	-0.121238	0.0559888	-2.08193	0.037349	0.433957
ATPAF2	387.884	-0.165297	-0.1799	0.0794841	-2.07963	0.0375596	0.435378
AUH	131.332	-0.27119	-0.374494	0.130402	-2.07966	0.0375572	0.435378
LINC01410	355.636	0.259804	0.345117	0.124986	2.07866	0.0376489	0.435378
MTSS1	368.752	0.254255	0.331027	0.1223	2.07894	0.037623	0.435378
NAA20	1486.59	-0.118369	-0.12329	0.0569354	-2.07901	0.0376163	0.435378
RP11-544I20.2	39.8505	0.15402	0.16561	0.0741115	2.07822	0.0376895	0.435378
RPS4X	2284.4	-0.15295	-0.164229	0.0735876	-2.07847	0.0376657	0.435378
CCNY	781.224	-0.158836	-0.171652	0.076485	-2.0767	0.0378292	0.43587
JRKL	86.4896	-0.299624	-0.526271	0.144291	-2.07653	0.0378451	0.43587
RPL5P5	23.8232	-0.215956	-0.254066	0.10399	-2.0767	0.0378295	0.43587
XKR9	42.5862	0.160008	0.173209	0.0770601	2.0764	0.0378569	0.43587
RPL3P7	36.9247	-0.172923	-0.190052	0.0833112	-2.07563	0.0379284	0.436333
TCP11L2	163.654	-0.249233	-0.318091	0.120097	-2.07527	0.0379615	0.436354
ZNF277	256.754	-0.210337	-0.244881	0.101395	-2.07444	0.0380389	0.436884
ITGAE	508.555	-0.213192	-0.249556	0.102788	-2.07409	0.0380706	0.436889
CFLAR	2138.88	0.117255	0.122068	0.0565576	2.0732	0.0381541	0.437248
NFE2L3	327.385	-0.259332	-0.342728	0.125172	-2.07181	0.0382832	0.437248
RASA4B	17.873	-0.270205	-0.373055	0.130398	-2.07215	0.0382512	0.437248
TMEM230	2739.04	-0.103355	-0.106589	0.0498819	-2.072	0.0382653	0.437248
XRN1	872.369	0.180403	0.20043	0.0870782	2.07174	0.0382897	0.437248
ZSCAN12	49.6775	-0.292837	-0.469013	0.141266	-2.07294	0.0381779	0.437248
DSG2	18.6824	0.193481	0.219215	0.0934227	2.07103	0.0383558	0.437645
RP11-486I11.2	55.1079	-0.287198	-0.438834	0.13876	-2.06975	0.0384755	0.438652
RP11-756A22.7	25.0638	0.196655	0.223999	0.0950516	2.06893	0.0385526	0.439172
ARRDC4	956.013	-0.241501	-0.302113	0.116763	-2.06831	0.0386113	0.439482
FBXL8	62.3827	-0.26573	-0.360877	0.128539	-2.06731	0.0387053	0.440193
AC005154.6	240.017	0.202522	0.233109	0.0979879	2.06681	0.0387525	0.440249
TMEM63A	340.307	0.23938	0.298993	0.115834	2.06659	0.0387732	0.440249
MTRNR2L1	239.11	-0.298242	-0.657166	0.14435	-2.0661	0.038819	0.440411
C18orf15	18.3193	0.297117	0.724919	0.143842	2.06559	0.0388674	0.440603
ACO1	259.676	-0.228639	-0.277134	0.110754	-2.06439	0.0389808	0.44153
LDLRAD4	157.161	-0.278874	-0.404986	0.135128	-2.06377	0.0390391	0.441832
ZNF143	637.679	-0.175153	-0.193301	0.0849001	-2.06305	0.039108	0.442253
ADRB2	287.82	0.292284	0.484265	0.141746	2.06203	0.039205	0.442401
C2	71.2383	0.294162	0.502246	0.142785	2.06018	0.0393816	0.442401
GGTA1P	413.447	-0.280491	-0.412507	0.136123	-2.06058	0.0393433	0.442401
GLOD4	709.761	-0.144718	-0.154295	0.0701996	-2.06152	0.0392531	0.442401
IKZF3	69.6509	0.188654	0.212461	0.091551	2.06065	0.0393369	0.442401
JAK2	2250.69	0.202047	0.23265	0.0980942	2.05972	0.0394251	0.442401
NDUFB9	1601.98	0.137829	0.146036	0.0669205	2.05959	0.0394379	0.442401
TMEM175	667.528	0.14011	0.148753	0.0679751	2.06119	0.0392848	0.442401
UBALD2	78.8158	0.246678	0.315476	0.119649	2.06168	0.0392385	0.442401
WDFY1	1288.36	0.204381	0.236235	0.0991215	2.06192	0.0392151	0.442401
N4BP2L1	1042.77	-0.155372	-0.167531	0.0754946	-2.05805	0.0395852	0.443698
SNHG8	168.107	-0.228799	-0.277942	0.111204	-2.05747	0.0396414	0.443971
RP11-665C16.9	92.6974	0.145788	0.155691	0.0708729	2.05703	0.0396836	0.444087
SPEN	794.387	0.166119	0.181467	0.0808177	2.05548	0.0398329	0.445401
HES4	23.7584	0.265569	1.09167	0.129288	2.05408	0.0399678	0.446043
LINC00959	43.6894	-0.292222	-0.479538	0.142283	-2.05381	0.0399941	0.446043
PCGF1	244.522	0.19244	0.218259	0.0937703	2.05225	0.0401457	0.446043
RAC1P2	551.69	0.244236	0.31095	0.118992	2.05254	0.0401177	0.446043
RBM34	474.813	0.167731	0.18363	0.0816857	2.05336	0.0400373	0.446043
SRSF10	1546.27	-0.137723	-0.145951	0.0670997	-2.05252	0.0401195	0.446043
TMEM115	427.928	0.175868	0.19461	0.0856674	2.05291	0.040081	0.446043
UBE2L5P	25.3778	0.197297	0.225628	0.0960966	2.05312	0.0400614	0.446043
MAGI2	34.5915	0.155161	0.167414	0.0756438	2.0512	0.0402474	0.446816
PABPC1L	29.9125	-0.294334	-0.502597	0.143588	-2.04986	0.0403783	0.447914
AC125232.1	71.2573	-0.229892	-0.280706	0.112211	-2.04874	0.0404878	0.44824
ADPGK	2854.37	-0.111124	-0.115291	0.0542794	-2.04726	0.0406324	0.44824
ALOX15B	131.311	0.287393	0.816987	0.140581	2.04433	0.0409213	0.44824
CTB-63M22.1	279.992	-0.166216	-0.181703	0.0812745	-2.04512	0.0408433	0.44824
CTC-444N24.11	131.57	-0.263504	-0.358787	0.128847	-2.04509	0.0408458	0.44824
DHX34	228.088	0.197876	0.226773	0.0967856	2.04448	0.0409062	0.44824
HLA-B	22841	0.186064	0.209171	0.0910101	2.04444	0.0409105	0.44824
LAS1L	430.133	-0.168378	-0.18457	0.0823383	-2.04495	0.0408597	0.44824
LINC00624	33.4608	-0.293747	-0.673981	0.143604	-2.04554	0.0408018	0.44824
NAAA	3389.66	-0.148388	-0.15896	0.072496	-2.04684	0.0406742	0.44824
PMS1	211.691	-0.211774	-0.248501	0.103399	-2.04812	0.0405485	0.44824
2018-09-11	185.546	-0.234248	-0.289424	0.114521	-2.04546	0.0408092	0.44824
SON	4854.85	0.0924757	0.094825	0.0451847	2.04662	0.0406957	0.44824
TBC1D3L	18.3669	-0.271004	-0.381294	0.132288	-2.04858	0.0405032	0.44824
TMEM255A	33.0417	0.230837	1.52308	0.112878	2.04502	0.0408527	0.44824
ZC3H7B	49.6209	0.288039	0.466373	0.140793	2.04582	0.0407736	0.44824
PNRC1	3600.78	-0.16332	-0.177949	0.079938	-2.04309	0.0410436	0.449228
FAM8A1	497.032	0.254118	0.336152	0.124458	2.04181	0.0411708	0.449577
FLVCR2	586.517	0.215932	0.256417	0.105778	2.04137	0.0412141	0.449577
SLC9A4	66.2532	0.146584	0.156846	0.071773	2.04234	0.0411183	0.449577
TMSB10P1	92.5682	0.17359	0.191758	0.0850452	2.04114	0.0412365	0.449577
WHAMMP3	85.0475	-0.183392	-0.20528	0.0898381	-2.04136	0.0412147	0.449577
ZFC3H1	596.348	-0.141953	-0.151158	0.0695726	-2.04036	0.0413145	0.450077
USP42	217.616	0.254869	0.338464	0.12496	2.0396	0.0413899	0.450547
NEIL2	41.4071	-0.296204	-0.593596	0.14533	-2.03814	0.0415357	0.451782
HAP1	40.6969	0.159101	0.172665	0.078099	2.03717	0.0416334	0.452492
CTD-2542C24.5	25.1356	0.168342	0.184767	0.0826495	2.03682	0.041668	0.452516
CHMP4B	76.3472	0.2622	0.359832	0.128809	2.03557	0.0417935	0.453526
AC245100.1	33.211	0.195287	0.223095	0.095958	2.03513	0.0418381	0.453658
AMDHD1	26.1198	0.266929	1.0338	0.13122	2.03421	0.0419305	0.453729
SRRM1	1664.35	0.0856362	0.0875112	0.0420913	2.03454	0.0418975	0.453729
TRPV4	39.1988	0.287471	0.792875	0.141327	2.03409	0.0419422	0.453729
BORCS6	136.869	-0.206391	-0.240417	0.101533	-2.03275	0.0420777	0.454128
DDX42	394.62	-0.174085	-0.192509	0.0856204	-2.03322	0.0420301	0.454128
FHL3	876.097	-0.184638	-0.207361	0.0909449	-2.03022	0.0423343	0.454128
HMGB1P1	206.445	-0.0837022	-0.085452	0.0411838	-2.03241	0.0421125	0.454128
LYPLA1P3	63.9898	-0.178121	-0.198083	0.0876402	-2.03242	0.0421115	0.454128
MIR1244-3	121.471	-0.118717	-0.123952	0.0584781	-2.03012	0.0423448	0.454128
NT5C3AP1	89.3081	0.194554	0.222212	0.0957968	2.0309	0.0422648	0.454128
PACS2	226.68	0.179307	0.199949	0.0883479	2.02956	0.0424018	0.454128
RP11-131M11.3	31.9329	0.234431	0.292135	0.115479	2.03008	0.0423488	0.454128
RP5-1174J21.1	39.812	-0.196465	-0.224854	0.0967391	-2.03087	0.042268	0.454128
RRN3P1	116.616	-0.17945	-0.199966	0.0883141	-2.03195	0.0421589	0.454128
SERF1B	38.003	-0.279758	-0.421362	0.137824	-2.02982	0.042375	0.454128
ZNF529	68.9733	-0.273195	-0.39391	0.134523	-2.03084	0.0422716	0.454128
CTD-2270P14.1	257.806	0.229424	0.2823	0.113131	2.02795	0.0425655	0.454151
LY75	95.3671	-0.252635	-0.332303	0.124523	-2.02882	0.0424763	0.454151
RP11-20I23.6	22.6062	0.252556	0.33431	0.124558	2.02762	0.042599	0.454151
RP3-405J10.3	24.1355	0.184278	0.20707	0.0908576	2.02821	0.0425386	0.454151
ZCCHC2	74.7296	0.294726	0.617939	0.145346	2.02775	0.0425854	0.454151
ZNF514	18.955	-0.247396	-1.00516	0.121945	-2.02875	0.0424842	0.454151
ERVK-28	26.1692	0.215756	0.257012	0.10647	2.02645	0.0427187	0.455079
PLEKHG4B	21.2174	0.178541	0.199031	0.0881864	2.02459	0.0429098	0.456767
MAFG	169.393	0.252793	0.335614	0.124909	2.02382	0.0429883	0.457254
PRKAG2-AS1	152.563	-0.246785	-0.318899	0.12198	-2.02316	0.0430567	0.457633
TBC1D7	265.239	0.233009	0.289975	0.115192	2.02279	0.0430945	0.457686
AC004069.2	106.959	-0.133757	-0.141522	0.0662469	-2.01907	0.0434803	0.45785
AC012314.19	18.6624	-0.287813	-0.474213	0.142407	-2.02106	0.0432737	0.45785
CDKL1	21.1303	0.265188	0.373156	0.131354	2.01887	0.0435008	0.45785
CYBA	8497.32	0.123618	0.129646	0.0611938	2.0201	0.0433725	0.45785
EIF1AXP1	40.5898	-0.163188	-0.17816	0.0807414	-2.02111	0.043268	0.45785
PPIH	107.719	-0.215971	-0.257215	0.106918	-2.01997	0.043387	0.45785
PPP1R3B	122.944	0.262922	0.365343	0.130113	2.02071	0.0433094	0.45785
PTGS1	690.994	-0.199219	-0.229571	0.0986572	-2.0193	0.0434557	0.45785
RNU4ATAC	18.6433	-0.291385	-0.512897	0.144332	-2.01885	0.0435033	0.45785
RP11-1114A5.4	37.2698	0.180604	0.202034	0.0894464	2.01913	0.0434738	0.45785
SLC25A37	767.626	0.17893	0.199664	0.0885748	2.02011	0.0433723	0.45785
TNFRSF10A	322.757	0.203447	0.236629	0.100764	2.01905	0.0434818	0.45785
AC007389.3	27.246	0.171396	0.189265	0.0849244	2.01822	0.0435685	0.458158
RP3-455J7.4	131.524	0.250436	0.330361	0.124105	2.01793	0.0435982	0.458158
C8orf59	384.691	0.150096	0.161499	0.0744289	2.01663	0.0437341	0.458682
DUSP10	203.578	-0.232562	-0.288642	0.115347	-2.0162	0.0437794	0.458682
TK2	467.669	-0.178132	-0.198499	0.088342	-2.01639	0.0437589	0.458682
TMEM267	175.469	-0.222489	-0.269121	0.110306	-2.01702	0.0436936	0.458682
KLHDC10	98.8076	-0.278975	-0.42411	0.138414	-2.01552	0.0438505	0.459082
NAP1L4	1052.86	-0.138398	-0.147121	0.0687076	-2.01431	0.043977	0.459571
PEBP1	682.514	-0.154595	-0.167172	0.0767554	-2.01413	0.0439959	0.459571
TOR1A	1428.58	0.133046	0.140737	0.0660504	2.01431	0.0439769	0.459571
GMPSP1	20.9267	-0.203751	-0.237055	0.101241	-2.01253	0.0441639	0.460981
EEF1A1P25	204.434	-0.144157	-0.154149	0.0716488	-2.012	0.04422	0.461222
FADS1	588.592	-0.222847	-0.270266	0.110846	-2.01042	0.044387	0.462619
ARGLU1	2000.83	-0.105851	-0.109573	0.0526839	-2.00917	0.0445195	0.463654
EEF1A1P7	49.8078	-0.169632	-0.186981	0.0844945	-2.00761	0.0446853	0.465033
EFHD2	6053.53	0.0981507	0.101099	0.0489122	2.00667	0.0447849	0.465529
LINC01447	33.9565	0.175235	0.194859	0.0873321	2.00653	0.0447996	0.465529
AC011380.8	65.8278	-0.198538	-0.229062	0.0989767	-2.00591	0.044866	0.465677
PCBP1-AS1	374.148	-0.176189	-0.196061	0.0878547	-2.00546	0.0449139	0.465677
PCDH9	29.584	0.190819	0.217443	0.0951363	2.00574	0.0448837	0.465677
ZNF776	113.143	-0.290112	-0.522067	0.144728	-2.00454	0.045012	0.466349
C12orf77	38.2964	0.198684	0.229718	0.0991509	2.00386	0.0450855	0.466763
GDE1	940.766	-0.142253	-0.151929	0.0710523	-2.00208	0.045276	0.467696
MOB1B	249.582	-0.225206	-0.27531	0.112457	-2.00259	0.0452209	0.467696
VSIG10L	34.2258	0.279484	0.82437	0.139589	2.0022	0.0452634	0.467696
PLA2G12A	138.033	0.254833	0.345001	0.12731	2.00167	0.0453206	0.46781
C1RL-AS1	26.1394	0.267545	0.387305	0.133875	1.99847	0.0456655	0.470213
EIF4A3	1155.56	-0.119441	-0.124963	0.0597816	-1.99795	0.0457217	0.470213
HP09025	35.4636	0.166781	0.18346	0.0834715	1.99806	0.0457101	0.470213
PROSC	1460.18	-0.127391	-0.134179	0.063751	-1.99826	0.0456882	0.470213
STARD7	3143.99	-0.103968	-0.107526	0.0520202	-1.99862	0.0456498	0.470213
NUMB	3938.57	-0.118584	-0.12399	0.0593964	-1.99648	0.0458818	0.471513
FAM234A	354.34	0.157316	0.17102	0.078874	1.99453	0.0460946	0.473003
ZSCAN21	45.1606	-0.285948	-0.484518	0.143365	-1.99454	0.0460933	0.473003
POU5F1B	21.5445	-0.275546	-0.418051	0.138279	-1.99269	0.0462957	0.474718
ABHD17A	286.1	0.138317	0.147272	0.0694462	1.99172	0.0464019	0.474764
HNRNPA1P7	40.5293	-0.167139	-0.183974	0.0839168	-1.99172	0.0464022	0.474764
ZCCHC7	352.753	-0.178911	-0.200236	0.0898047	-1.99222	0.046347	0.474764
ACP6	47.8052	-0.269974	-0.395516	0.135804	-1.98797	0.0468148	0.4748
ACTBP9	202.645	0.101211	0.104543	0.0510613	1.98214	0.0474637	0.4748
AF131216.6	24.74	0.280383	0.765048	0.141561	1.98065	0.0476302	0.4748
C16orf86	66.9593	-0.211915	-0.252089	0.106652	-1.98697	0.0469257	0.4748
C20orf24	569.991	0.105486	0.109252	0.0530241	1.98939	0.0466582	0.4748
CD4	5643.07	-0.139387	-0.148621	0.0702314	-1.98468	0.04718	0.4748
CENPB	43.4778	0.256428	0.354584	0.129624	1.97825	0.0479009	0.4748
CNOT4	428.797	-0.14742	-0.158583	0.0744336	-1.98055	0.0476416	0.4748
CTA-384D8.36	70.5091	0.273235	0.419854	0.138102	1.97851	0.0478717	0.4748
DBI	2178.02	0.129586	0.136855	0.0651697	1.98844	0.0467636	0.4748
DECR2	96.9938	-0.24323	-0.314717	0.12219	-1.9906	0.0465254	0.4748
DUSP1	48158.1	-0.277003	-0.428181	0.139419	-1.98684	0.0469406	0.4748
EXTL3-AS1	27.3478	0.185939	0.210852	0.0937173	1.98404	0.0472509	0.4748
FRMD8	779.651	-0.130391	-0.137774	0.0655142	-1.99027	0.0465615	0.4748
GINS4	35.852	-0.214432	-0.256884	0.108158	-1.98258	0.0474144	0.4748
GLUD1	2648.97	-0.120378	-0.126171	0.060878	-1.97737	0.0479999	0.4748
GTPBP2	173.341	0.234482	0.297183	0.118283	1.98237	0.0474374	0.4748
JAML	7824.3	-0.132698	-0.140619	0.0670705	-1.97849	0.0478735	0.4748
KPNA1	532.074	-0.178282	-0.199595	0.0899147	-1.98279	0.0473906	0.4748
LINC00869	77.1911	0.17669	0.197348	0.0889011	1.98749	0.0468683	0.4748
MTCO3P11	22.2676	0.284649	0.69576	0.143782	1.97972	0.0477349	0.4748
P3H4	35.71	-0.180248	-0.202478	0.0910289	-1.98012	0.0476899	0.4748
PNRC2	1846.58	0.13008	0.13753	0.0657757	1.97763	0.0479708	0.4748
PSMD3	947.086	-0.120518	-0.126286	0.0607246	-1.98466	0.0471821	0.4748
RBBP7	820.032	-0.149465	-0.161138	0.0754238	-1.98167	0.0475166	0.4748
REC8	64.7866	0.287611	0.525942	0.14444	1.99121	0.0464574	0.4748
RP11-365O16.1	111.716	0.119051	0.124628	0.0601077	1.98063	0.0476326	0.4748
RP11-452H21.4	20.3493	-0.287131	-0.520068	0.144821	-1.98266	0.0474049	0.4748
RP4-612B18.1	43.0182	-0.180286	-0.202268	0.0906411	-1.98901	0.0467004	0.4748
RP5-832C2.5	34.0903	-0.271913	-0.405182	0.137066	-1.98381	0.0472765	0.4748
RPL23	4244.62	-0.147454	-0.158668	0.0745697	-1.9774	0.047996	0.4748
RPL28	819.765	0.176186	0.196734	0.0888091	1.98387	0.0472698	0.4748
S100A6	11623.2	0.123281	0.129547	0.0623472	1.97734	0.0480036	0.4748
SCAND1	1179.35	0.110091	0.114428	0.0555033	1.98349	0.0473122	0.4748
SLC22A18	455.498	0.159688	0.174293	0.0804848	1.98408	0.0472475	0.4748
SPACA6	16.9103	-0.270127	-0.396852	0.135967	-1.98671	0.0469544	0.4748
SPAG5-AS1	55.65	-0.282032	-0.463643	0.142334	-1.98148	0.0475371	0.4748
SPC24	17.0352	0.218743	0.26527	0.110289	1.98336	0.0473272	0.4748
SUCLG2	489.358	-0.163338	-0.178944	0.0821181	-1.98906	0.0466947	0.4748
TMED10	3935.59	-0.0931344	-0.0957117	0.047072	-1.97855	0.0478665	0.4748
TSPAN17	332.569	0.191571	0.219367	0.0965583	1.98399	0.0472565	0.4748
UXS1	458.525	0.161928	0.17735	0.0818479	1.9784	0.0478838	0.4748
VMP1	6414.67	-0.113001	-0.117728	0.057095	-1.97918	0.0477958	0.4748
XRCC5	4730.53	-0.0894093	-0.0916735	0.0451335	-1.981	0.0475918	0.4748
YWHAZP6	46.2266	0.157663	0.171714	0.0796067	1.98052	0.0476451	0.4748
ZBTB11	414.03	-0.205518	-0.24132	0.103546	-1.98479	0.0471683	0.4748
ZFP14	104.291	-0.214517	-0.25714	0.108408	-1.97879	0.0478392	0.4748
GMIP	2458.07	0.13025	0.137748	0.0659223	1.97581	0.0481759	0.476168
BTG1	5742.77	-0.149776	-0.16163	0.0758577	-1.97443	0.0483332	0.476373
RAC2	4495.29	0.103704	0.107329	0.0525086	1.975	0.0482683	0.476373
RP1-99E18.2	96.6233	0.28115	0.473371	0.142339	1.97521	0.0482439	0.476373
TBL2	424.714	0.195953	0.226591	0.0992387	1.97456	0.0483177	0.476373
PAPLN	77.654	0.233164	0.295235	0.118117	1.974	0.0483818	0.476516
TIMM13	568.248	-0.143804	-0.15417	0.072866	-1.97354	0.0484337	0.476692
CERS2	1082.19	-0.120398	-0.12623	0.0610626	-1.97171	0.048643	0.477406
RP1-80N2.3	21.9897	0.22616	0.280604	0.114673	1.97221	0.048586	0.477406
RREB1	724.312	0.138448	0.14764	0.0702088	1.97194	0.0486161	0.477406
SUGT1	597.075	-0.133839	-0.142046	0.0678753	-1.97184	0.0486278	0.477406
CD300LF	1743.4	-0.137292	-0.146236	0.0697136	-1.96937	0.0489105	0.477568
FCHSD2	739.689	-0.137332	-0.146288	0.0697411	-1.96917	0.0489332	0.477568
IRF1	4413.37	0.175325	0.195887	0.0890032	1.96987	0.0488533	0.477568
NEDD4L	49.1323	0.279466	0.464916	0.14192	1.96918	0.048932	0.477568
NUDT3	931.456	-0.138027	-0.147117	0.0700442	-1.97057	0.0487733	0.477568
PPEF2	21.1677	-0.19035	-0.21772	0.0965952	-1.97059	0.0487703	0.477568
RP11-159H3.1	26.6959	-0.157882	-0.172077	0.0801136	-1.97073	0.0487547	0.477568
TCAIM	345.979	-0.209837	-0.24947	0.106505	-1.9702	0.0488157	0.477568
BRCA2	59.5012	0.285011	0.532645	0.144775	1.96865	0.0489932	0.477821
BTN3A3	406.293	0.223302	0.275227	0.113464	1.96805	0.0490628	0.477832
HLA-J	239.157	0.193261	0.222604	0.0981927	1.96818	0.0490477	0.477832
UBQLN4	165.426	-0.254392	-0.347877	0.129308	-1.96734	0.0491439	0.478289
ACVR1	94.7139	0.26625	0.393347	0.135457	1.96556	0.0493495	0.479758
CSPG4P12	59.4603	0.154999	0.168502	0.0788623	1.96544	0.0493636	0.479758
AP3S2	189.791	-0.210946	-0.251824	0.107443	-1.96333	0.0496074	0.481792
FRS2	212.442	0.245045	0.325119	0.124859	1.96258	0.0496954	0.482159
ZBTB8OS	448.615	0.147496	0.158963	0.0751607	1.96241	0.0497143	0.482159
CTC-512J14.7	169.917	0.104236	0.107978	0.0531444	1.96138	0.0498352	0.482246
EEF1A1P11	930.427	-0.142918	-0.153221	0.0728728	-1.96119	0.0498568	0.482246
RP11-358L22.3	23.9391	-0.257037	-0.357149	0.131009	-1.96198	0.0497651	0.482246
TIMM22	417.089	-0.164723	-0.181347	0.0839928	-1.96115	0.0498613	0.482246
RP11-342K2.1	51.5288	0.264229	0.387585	0.134894	1.95879	0.0501376	0.484583
GORASP2	1097.69	-0.152719	-0.165624	0.0779997	-1.95794	0.0502368	0.485206
CCNG2	452.225	-0.182817	-0.206938	0.0934272	-1.95679	0.0503721	0.485829
DESI1	411.118	0.166265	0.183629	0.0849804	1.95651	0.0504057	0.485829
RABIF	488.671	0.165693	0.182846	0.0846748	1.95682	0.0503685	0.485829
AC137934.1	22.7745	-0.261755	-0.374764	0.133874	-1.95524	0.0505545	0.486927
LRRC42	112.008	-0.244914	-0.324103	0.125317	-1.95436	0.0506584	0.487592
EEF1A1P13	1296.29	-0.141819	-0.151958	0.0726068	-1.95325	0.0507901	0.48763
NOL4L	279.17	0.267343	0.402589	0.136824	1.95391	0.0507115	0.48763
SIRPG	88.7663	0.150428	0.162807	0.077018	1.95315	0.050802	0.48763
ZNF382	64.4627	0.179437	0.20228	0.0918673	1.95322	0.0507935	0.48763
RP11-492M23.2	263.488	-0.143213	-0.153686	0.0733373	-1.95279	0.0508439	0.487696
CLK3	1133	-0.110805	-0.115385	0.0567836	-1.95136	0.0510148	0.487716
HLA-G	517.835	0.179058	0.201776	0.0917677	1.95121	0.0510317	0.487716
PTPN7	167.809	0.277906	0.467978	0.142356	1.95219	0.0509152	0.487716
RP11-84C10.2	54.4396	0.274484	0.442341	0.140623	1.95191	0.0509485	0.487716
TRPM4	97.1962	-0.241093	-0.314953	0.123573	-1.95101	0.0510555	0.487716
ZNF501	24.0858	-0.28169	-0.496292	0.144335	-1.95164	0.0509813	0.487716
KBTBD3	84.8899	-0.245795	-0.32728	0.126126	-1.9488	0.0513191	0.4899
MTND1P23	1831.71	-0.176732	-0.198343	0.0907096	-1.94833	0.0513757	0.489918
SNHG21	17.3963	-0.257812	-0.362995	0.132333	-1.9482	0.0513912	0.489918
CXCR2P1	368.144	0.282824	0.565218	0.14533	1.94608	0.0516455	0.491671
SRGAP1	127.129	0.263644	0.389483	0.135467	1.94618	0.0516328	0.491671
FGD2	3129.51	0.147848	0.159652	0.0760179	1.94491	0.0517856	0.49235
RING1	138.7	0.175743	0.197172	0.090363	1.94486	0.0517922	0.49235
TNNT1	196.228	0.282669	0.571676	0.145361	1.9446	0.0518226	0.49235
SAMMSON	20.2435	0.18129	0.205301	0.0932733	1.94364	0.0519387	0.493117
IRF2BPL	243.985	0.205568	0.244143	0.105804	1.94291	0.052027	0.493285
ZNF586	175.184	-0.241316	-0.316677	0.124186	-1.94319	0.0519934	0.493285
FDXACB1	54.1552	-0.266351	-0.397188	0.137133	-1.94228	0.052103	0.49367
IYD	18.5579	0.186533	0.213319	0.0961374	1.94027	0.0523468	0.494974
2018-03-07	1902.4	-0.163946	-0.180733	0.0844855	-1.94052	0.0523164	0.494974
RP11-465N4.2	45.4874	-0.171909	-0.191678	0.0885896	-1.94051	0.0523174	0.494974
SEMA4F	20.8621	0.268779	0.416635	0.13857	1.93966	0.052421	0.495339
E2F3P2	23.2812	0.177829	0.200415	0.0916942	1.93937	0.0524567	0.495342
AC009950.2	192.3	0.235566	0.304939	0.121514	1.93859	0.0525512	0.495899
RP3-368A4.5	119.542	-0.239561	-0.313075	0.123606	-1.93811	0.0526094	0.496113
PLK2	58.4381	-0.257401	-0.819358	0.132915	-1.93659	0.0527959	0.496196
RP11-44F14.1	267.104	-0.16009	-0.175627	0.0826563	-1.93681	0.0527686	0.496196
RP11-575A19.2	24.4383	0.271963	0.43634	0.140379	1.93735	0.0527025	0.496196
SAP18	2763.31	0.0769492	0.0784426	0.0397278	1.93691	0.0527561	0.496196
USP25	314.08	0.219755	0.270815	0.113429	1.93739	0.0526979	0.496196
GPD2	514.485	0.210898	0.254032	0.108919	1.93628	0.0528328	0.496209
SRP9	4974.05	-0.092291	-0.0949145	0.0476734	-1.9359	0.0528801	0.496319
BCAS4	57.9026	0.144462	0.155557	0.0746851	1.93428	0.0530788	0.496845
HMGA1	414.628	0.168766	0.187578	0.0872323	1.93468	0.05303	0.496845
LONRF3	37.0572	0.281105	0.563262	0.145338	1.93415	0.0530944	0.496845
RP11-1H15.1	41.2615	0.204355	0.242598	0.105665	1.93399	0.053114	0.496845
RP11-51J9.5	85.7023	-0.206085	-0.244998	0.106507	-1.93495	0.0529969	0.496845
KLF16	28.932	0.261845	0.386996	0.135481	1.93271	0.0532723	0.49766
RP11-463O12.5	251.913	0.184024	0.20974	0.0952147	1.93273	0.0532699	0.49766
AC131056.3	36.3174	-0.258288	-0.806417	0.1337	-1.93185	0.0533777	0.49831
AC009302.2	55.4292	0.159989	0.175687	0.0828708	1.93059	0.0535341	0.499046
C4orf3	2607.82	0.100435	0.103879	0.0520404	1.92994	0.0536144	0.499046
DGKE	83.4175	-0.261387	-0.381444	0.13547	-1.92948	0.0536708	0.499046
RNF141	1719.94	-0.137885	-0.147384	0.0714396	-1.93009	0.0535956	0.499046
RNF144A	35.6157	0.278247	0.661683	0.144193	1.92968	0.0536466	0.499046
SPAG1	31.5513	0.278232	0.663145	0.14415	1.93016	0.0535871	0.499046
ASPH	249.052	0.25544	0.364151	0.13257	1.92683	0.0540007	0.499281
CHCHD10	220.044	-0.131223	-0.139312	0.0680274	-1.92897	0.0537344	0.499281
CLEC4G	89.5622	-0.259025	-0.373299	0.134449	-1.92656	0.0540341	0.499281
DECR1	1445.84	0.13937	0.149263	0.0722777	1.92825	0.0538237	0.499281
EEF1A1P12	417.827	-0.142379	-0.152989	0.0739237	-1.92603	0.0541003	0.499281
GALNT3	184.423	0.254571	0.361174	0.13215	1.92639	0.054056	0.499281
NIPSNAP3A	1158.64	-0.132502	-0.140876	0.0687853	-1.92631	0.054066	0.499281
NUP93	914.733	-0.141767	-0.152221	0.0735811	-1.92668	0.0540199	0.499281
PSME1	7961.78	0.118299	0.124118	0.0614366	1.92555	0.0541608	0.499281
RAB37	507.538	-0.20387	-0.241721	0.105875	-1.92557	0.0541581	0.499281
RPS5	1419.04	-0.128144	-0.135652	0.066519	-1.92643	0.0540504	0.499281
SART1	221.842	0.199292	0.234279	0.103444	1.92658	0.0540321	0.499281
TMEM218	407.899	-0.176491	-0.198623	0.0916092	-1.92657	0.0540337	0.499281
NAXD	240.899	-0.229419	-0.291174	0.119191	-1.9248	0.0542544	0.499813
ADI1	2239.99	-0.110551	-0.115243	0.0574769	-1.9234	0.0544304	0.501104
CLEC5A	293.648	-0.25809	-0.371306	0.134302	-1.92171	0.054642	0.502084
PAPD7	64.7252	0.257533	0.37332	0.133999	1.9219	0.0546181	0.502084
TBCD	515.954	0.158823	0.174312	0.0826477	1.92169	0.0546446	0.502084
CHD1	1471.52	0.138601	0.148396	0.0721402	1.92128	0.0546969	0.502097
LILRA6	1982.09	0.147234	0.159217	0.0766402	1.92111	0.054718	0.502097
AFMID	248.847	-0.164074	-0.181388	0.0855403	-1.91809	0.0550996	0.502176
AP000692.9	38.7682	0.161557	0.178086	0.0841952	1.91884	0.0550043	0.502176
FLI1	1915.58	-0.124412	-0.131297	0.0648439	-1.91864	0.0550303	0.502176
GLUL	11085.7	0.156193	0.170876	0.0814055	1.9187	0.0550226	0.502176
IL13RA1	2939.58	-0.172977	-0.193815	0.0901783	-1.91817	0.0550896	0.502176
NCBP1	561.528	-0.17049	-0.190261	0.0888322	-1.91924	0.0549538	0.502176
OSCAR	1816.4	0.14002	0.150192	0.0730034	1.918	0.0551113	0.502176
RP11-586D19.1	20.3915	0.17523	0.19719	0.0913117	1.91904	0.0549798	0.502176
SDC4	92.0131	0.278156	0.530965	0.145031	1.91791	0.0551222	0.502176
SKA2	235.583	0.200653	0.237039	0.104612	1.91807	0.0551021	0.502176
TMEM123	5206.17	0.194589	0.226827	0.101337	1.92022	0.0548304	0.502176
RP11-407P2.1	53.9334	-0.158521	-0.1739	0.0827026	-1.91676	0.0552687	0.502528
SLX1B-SULT1A4	28.3975	0.221607	0.276423	0.1156	1.91702	0.0552352	0.502528
ZBTB14	183.968	-0.237783	-0.311666	0.124024	-1.91724	0.055208	0.502528
BCL2L12	46.0774	-0.245575	-0.332539	0.128168	-1.91604	0.05536	0.502634
METTL7A	1237.98	0.14832	0.160682	0.0774184	1.91582	0.0553883	0.502634
SLC25A30	58.5755	-0.27853	-0.550451	0.145368	-1.91604	0.0553603	0.502634
PSRC1	169.987	-0.236427	-0.308563	0.123428	-1.9155	0.0554284	0.502671
INTS6	379.88	-0.172474	-0.19318	0.0900591	-1.91513	0.0554764	0.50278
ATXN3	617.537	0.107498	0.111839	0.0561418	1.91475	0.0555244	0.502888
ATP6V1F	3744.77	0.0782375	0.0798483	0.0408715	1.91423	0.055591	0.503165
ANKFY1	449.597	0.222273	0.278086	0.116149	1.91369	0.0556603	0.503466
AC138430.4	21.6881	0.170477	0.190574	0.0891635	1.91195	0.055882	0.503525
ATP6V0A2	367.292	-0.188341	-0.216884	0.0984469	-1.91312	0.0557323	0.503525
BLOC1S2	1351.22	0.111933	0.116886	0.0585449	1.91191	0.0558875	0.503525
FAM76A	396.403	0.161043	0.177516	0.0842672	1.9111	0.0559912	0.503525
MAF1	2082.23	-0.0998643	-0.103315	0.0522546	-1.91111	0.0559906	0.503525
MT1G	22.6975	0.255727	0.369508	0.133716	1.91247	0.0558166	0.503525
PXYLP1	195.529	0.247555	0.341579	0.129415	1.91288	0.055764	0.503525
SLC17A5	323.855	0.187735	0.216217	0.0981667	1.91241	0.0558237	0.503525
UBA2	1116.45	-0.126271	-0.133557	0.0660569	-1.91155	0.0559337	0.503525
ACTBP11	1246.08	0.0860779	0.0882549	0.0450884	1.90909	0.0562502	0.504217
B3GNT8	165.387	0.238706	0.317134	0.125037	1.90909	0.056251	0.504217
ELP2	510.632	-0.206349	-0.246998	0.108038	-1.90997	0.0561368	0.504217
FAM230B	17.4051	0.19409	0.226515	0.101667	1.90907	0.0562528	0.504217
FBXO46	64.9205	0.251757	0.355955	0.131859	1.90929	0.0562241	0.504217
RAB3B	48.2125	0.14701	0.159124	0.0770158	1.90882	0.0562848	0.504217
RILPL1	34.7999	0.275546	0.501935	0.144377	1.90851	0.0563256	0.504259
CUX1	980.386	0.133774	0.142633	0.0701257	1.90764	0.0564381	0.504942
CHMP2A	1644.89	0.0953754	0.0983803	0.0500185	1.9068	0.0565463	0.505143
DDX50	354.381	-0.165564	-0.1837	0.0868176	-1.90704	0.0565156	0.505143
SEC14L4	19.855	0.169238	0.18897	0.0887631	1.90663	0.056569	0.505143
GPATCH1	128.16	-0.257827	-0.375918	0.135415	-1.90398	0.0569133	0.50735
PHTF2	308.019	0.203709	0.24319	0.106997	1.90388	0.0569252	0.50735
XRCC6	2996.41	-0.100449	-0.103992	0.0527568	-1.904	0.0569099	0.50735
RASA2	589.378	0.160197	0.176558	0.0842074	1.90241	0.0571175	0.508739
AC111155.1	71.3272	0.111741	0.116727	0.0587724	1.90124	0.0572703	0.509775
QSOX1	1312.98	0.125979	0.133326	0.0663074	1.89993	0.0574428	0.510985
POLR2M	291.378	-0.182132	-0.207849	0.095878	-1.89962	0.0574829	0.511016
EIF2A	683.73	-0.143242	-0.154433	0.0754303	-1.899	0.0575647	0.511092
SLC23A2	265.773	0.234836	0.308713	0.123658	1.89908	0.0575544	0.511092
CD63	5793.88	0.124885	0.132043	0.0658003	1.89794	0.0577044	0.512008
RGCC	146.802	0.273876	0.643682	0.144346	1.89736	0.0577809	0.512361
TFE3	781.164	0.133566	0.142495	0.0704241	1.89659	0.0578821	0.512932
BTF3L4	1460.66	-0.111588	-0.116575	0.0588582	-1.89588	0.0579756	0.513122
STAU1	955.611	-0.122938	-0.129744	0.0648525	-1.89565	0.0580061	0.513122
SUMF1	1515.38	-0.14282	-0.153947	0.0753433	-1.89559	0.0580137	0.513122
HLA-DMB	4187	-0.145632	-0.157522	0.0768662	-1.89462	0.0581427	0.513937
UCHL5	582.819	-0.14642	-0.158552	0.0773442	-1.89309	0.0583458	0.51508
ZNF69	37.0211	-0.265762	-0.418271	0.140376	-1.89322	0.0583285	0.51508
ACTG1P9	104.428	0.106508	0.110835	0.056283	1.89237	0.0584419	0.515296
ARL3	250.216	-0.193378	-0.225863	0.102215	-1.89188	0.0585068	0.515296
PTDSS1	1472.82	-0.133472	-0.142403	0.0705373	-1.89222	0.0584622	0.515296
SNORD59A	27.1622	-0.218753	-0.272033	0.115632	-1.8918	0.0585178	0.515296
CBR1	1080.56	0.163085	0.180745	0.0862289	1.8913	0.0585841	0.515555
APOBEC3D	68.468	0.217382	0.270229	0.114984	1.89053	0.0586871	0.516136
COX17P1	36.749	0.163927	0.181995	0.0868384	1.88773	0.0590625	0.517167
GPATCH2L	432.497	0.174037	0.196372	0.0921756	1.88811	0.0590116	0.517167
MYO1G	2806.89	0.148578	0.161458	0.0787074	1.88772	0.0590636	0.517167
POLR2E	2436.41	-0.0960917	-0.0992268	0.0508694	-1.88899	0.0588936	0.517167
RP11-351I24.1	21.6094	0.274377	0.543287	0.145294	1.88842	0.0589694	0.517167
TXNDC16	179.472	-0.238791	-0.318666	0.126395	-1.88925	0.0588588	0.517167
ZFP30	23.3881	0.255637	0.377097	0.135345	1.88878	0.0589218	0.517167
ANXA7	2406.68	-0.102437	-0.106283	0.0543112	-1.88612	0.059279	0.518273
RP11-438L7.1	25.0272	0.17428	0.196806	0.0924096	1.88595	0.0593012	0.518273
XRCC6P1	28.0131	-0.168267	-0.188018	0.0892134	-1.88612	0.0592792	0.518273
A1BG	91.7458	-0.224151	-0.284085	0.118928	-1.88477	0.0594614	0.51842
APOPT1	259.617	-0.11709	-0.122988	0.0621433	-1.8842	0.0595381	0.51842
FCAR	835.604	0.173354	0.195483	0.0919903	1.88448	0.0594995	0.51842
LOH12CR2	17.8551	-0.256221	-0.376425	0.135979	-1.88427	0.0595288	0.51842
SHFM1P1	27.7631	0.178377	0.202859	0.0946623	1.88436	0.0595169	0.51842
TAF3	349.407	-0.170312	-0.190954	0.0903905	-1.88418	0.0595408	0.51842
B4GALT5	137.129	0.223935	0.284952	0.118917	1.88312	0.0596836	0.519341
IPO7	121.344	-0.241246	-0.326939	0.128263	-1.88087	0.0599895	0.521677
C5orf15	1453.82	-0.118987	-0.125229	0.0632973	-1.87982	0.0601332	0.522277
TLR1	1099.85	0.171092	0.192333	0.0910107	1.87992	0.0601196	0.522277
ANKRD42	130.002	-0.232989	-0.305274	0.123965	-1.87948	0.0601787	0.522347
RP11-1379J22.5	17.8878	-0.205245	-0.247026	0.109268	-1.87837	0.060331	0.523344
TBC1D9	708.489	-0.203925	-0.244729	0.108605	-1.87768	0.0604255	0.523838
MIR6820	371.785	0.101666	0.105468	0.0541642	1.877	0.0605181	0.524315
LHFPL2	374.023	0.256327	0.384499	0.136586	1.87667	0.060563	0.524379
MTX3	66.9676	0.262896	0.419125	0.140131	1.87607	0.0606454	0.524441
TPMT	772.951	0.159369	0.175991	0.0849413	1.87622	0.0606248	0.524441
DDX21	835.395	0.142252	0.153547	0.0758366	1.87577	0.0606866	0.524474
ADCK3	606.81	-0.177352	-0.201637	0.0947706	-1.87139	0.0612917	0.525158
AL133493.2	34.5016	0.146966	0.15965	0.0785555	1.87085	0.0613655	0.525158
ANXA1	19316.6	0.136336	0.146205	0.0728952	1.8703	0.0614427	0.525158
CTSZ	211.057	0.174277	0.1972	0.093058	1.87278	0.0610989	0.525158
F13A1	7291.93	-0.232599	-0.305341	0.124223	-1.87243	0.0611474	0.525158
FHDC1	19.0972	0.209726	0.256519	0.111996	1.87263	0.0611196	0.525158
GOT2	452.814	-0.208229	-0.252898	0.111131	-1.87372	0.0609688	0.525158
HLA-K	149.556	0.144699	0.156705	0.0772915	1.87212	0.0611907	0.525158
KB-1183D5.13	17.783	0.182341	0.209388	0.0972916	1.87417	0.0609069	0.525158
MAPKAP1	983.964	-0.123094	-0.130134	0.0657968	-1.87082	0.0613695	0.525158
MFSD10	961.863	0.11946	0.125866	0.0638717	1.87031	0.0614411	0.525158
MYC	192.881	0.258401	0.395076	0.137827	1.87482	0.0608174	0.525158
POTEG	255.009	0.089178	0.0917094	0.0476287	1.87236	0.0611568	0.525158
PRDX1	1609.88	0.110438	0.115399	0.0589558	1.87323	0.0610368	0.525158
RANGAP1	246.744	-0.190551	-0.222241	0.101847	-1.87094	0.0613529	0.525158
RP11-378E13.3	29.076	0.139925	0.150643	0.0746553	1.87428	0.0608915	0.525158
RP5-1174N9.2	25.0573	0.228917	0.298003	0.122381	1.87053	0.0614106	0.525158
RPL21P28	182.848	-0.124614	-0.13193	0.0666057	-1.87092	0.0613558	0.525158
GIT2	2077.41	-0.104201	-0.10835	0.0558123	-1.86699	0.0619033	0.528771
AP002381.2	38.6847	-0.173034	-0.195444	0.0927613	-1.86537	0.0621301	0.530384
COMMD5	595.223	0.155659	0.171257	0.0835781	1.86244	0.062541	0.531209
CSDE1	4798.26	-0.110912	-0.115999	0.0595534	-1.8624	0.0625461	0.531209
E2F3	408.007	-0.162926	-0.18109	0.0874448	-1.86319	0.0624352	0.531209
FAM214B	595.744	0.156311	0.172162	0.0839734	1.86143	0.0626831	0.531209
GRB10	51.3181	0.262344	0.732395	0.140885	1.86212	0.0625865	0.531209
HABP4	19.5677	0.22271	1.18756	0.119486	1.86391	0.0623345	0.531209
JUN	2672.28	-0.262763	-0.419622	0.141084	-1.86246	0.0625384	0.531209
NGLY1	660.365	-0.140871	-0.151954	0.0756611	-1.86188	0.0626207	0.531209
NPM1P6	21.5759	-0.176973	-0.201421	0.0950672	-1.86156	0.0626653	0.531209
PER3	63.8314	-0.270603	-0.519357	0.145333	-1.86195	0.0626095	0.531209
RP11-326C3.11	16.9203	0.270704	0.548651	0.145363	1.86226	0.0625664	0.531209
SP2	333.708	0.167909	0.188273	0.0901841	1.86185	0.0626247	0.531209
DDIAS	203.8	-0.264094	-0.430873	0.142014	-1.85964	0.0629364	0.533032
AC091492.2	30.0483	0.17745	0.202456	0.0954928	1.85826	0.0631323	0.533397
H2AFX	52.6621	-0.241322	-0.331608	0.129852	-1.85844	0.0631069	0.533397
PI4KA	579.738	0.138854	0.149493	0.0746979	1.85887	0.0630457	0.533397
PRKAB2	166.831	-0.254948	-0.380556	0.137162	-1.85873	0.0630654	0.533397
C17orf62	3119.49	-0.111152	-0.116301	0.0598269	-1.85789	0.0631841	0.533414
CLEC4A	2503.6	-0.0959748	-0.0992154	0.0516921	-1.85666	0.0633592	0.533414
CLTB	1070.8	0.0933716	0.0963464	0.0502867	1.85678	0.0633419	0.533414
POLR1A	90.8404	0.207911	0.25415	0.111919	1.8577	0.0632122	0.533414
PSMB3	3389.89	0.0967018	0.100022	0.0520769	1.8569	0.0633249	0.533414
RP11-165F24.3	33.3325	0.267206	0.475258	0.143919	1.85663	0.0633634	0.533414
RP11-344N10.5	29.3553	0.20486	0.248552	0.110359	1.85629	0.0634118	0.533499
DARS	734.99	-0.151457	-0.165716	0.0816087	-1.85589	0.0634696	0.533664
CXorf21	412.869	0.197641	0.235473	0.106558	1.85477	0.0636292	0.534042
NUDT16P1	465.168	-0.219011	-0.276136	0.118079	-1.85479	0.063626	0.534042
RP11-617F23.1	19.9621	0.269547	0.570672	0.145307	1.85502	0.0635934	0.534042
RP11-681B3.4	26.4308	0.215471	0.269883	0.116255	1.85343	0.0638207	0.535327
INMT	36.0276	0.151894	0.166428	0.08199	1.85259	0.063941	0.536014
RP11-638I2.10	91.4852	0.158003	0.174692	0.0853335	1.8516	0.0640836	0.536887
CLSPN	45.4867	0.188207	0.219777	0.101762	1.84949	0.0643868	0.537407
FAAH	462.286	-0.195753	-0.232127	0.105898	-1.8485	0.0645304	0.537407
GPSM3	3026.48	0.0758032	0.0773747	0.0410069	1.84855	0.0645233	0.537407
IFT57	265.036	-0.199176	-0.238096	0.107727	-1.84889	0.0644731	0.537407
KIAA0040	931.011	0.173823	0.197246	0.0939216	1.85072	0.0642094	0.537407
LINC00608	19.7538	0.168778	0.189917	0.0912955	1.8487	0.0645013	0.537407
RAB24	2497.22	-0.101948	-0.105897	0.055103	-1.85013	0.0642948	0.537407
RP11-10O22.1	52.7632	0.13497	0.144762	0.0729525	1.85011	0.064298	0.537407
RP11-418J17.1	22.0105	-0.2623	-0.425991	0.141803	-1.84975	0.0643503	0.537407
THAP8	91.5805	0.243088	0.342323	0.131469	1.84901	0.0644558	0.537407
LPCAT1	694.368	0.182485	0.210621	0.0987557	1.84784	0.0646256	0.537559
SLC30A1	1052.75	-0.168302	-0.189097	0.091072	-1.84801	0.0646003	0.537559
COPZ1	1731.24	-0.0866633	-0.0890445	0.046914	-1.84728	0.0647064	0.537863
ZBTB48	326.945	-0.177979	-0.203445	0.0963585	-1.84706	0.0647391	0.537863
TUBA1B	876.557	0.150091	0.164154	0.081293	1.8463	0.0648482	0.538448
AFF4	343.126	0.158984	0.176164	0.0861563	1.8453	0.0649936	0.538695
CCDC86	155.458	-0.208783	-0.256141	0.11314	-1.84535	0.0649868	0.538695
TRIP6	51.4207	0.253124	0.383017	0.137158	1.8455	0.0649651	0.538695
AC026271.5	125.522	-0.125356	-0.133064	0.0679636	-1.84446	0.0651166	0.538758
NSUN6	107.424	-0.228712	-0.299809	0.124024	-1.8441	0.0651683	0.538758
NUP88	362.937	-0.178138	-0.203836	0.096662	-1.8429	0.0653435	0.538758
PDE12	384.765	0.181409	0.209125	0.098418	1.84325	0.0652924	0.538758
PEX7	67.3491	0.265744	0.477323	0.144127	1.84382	0.06521	0.538758
RBMX	2425.87	-0.107872	-0.112636	0.0585349	-1.84287	0.0653484	0.538758
SIAE	116.977	0.265093	0.466914	0.143692	1.84488	0.0650557	0.538758
TNFAIP3	1405.54	0.256333	0.400128	0.13904	1.84359	0.0652422	0.538758
UFL1	585.813	-0.148542	-0.162111	0.0805881	-1.84323	0.0652958	0.538758
SPACA9	27.7844	-0.249528	-0.363945	0.135458	-1.8421	0.0654609	0.539049
TUBGCP2	1279.28	-0.129251	-0.137796	0.0701612	-1.84221	0.0654449	0.539049
FRG1	378.373	0.125319	0.133068	0.0680501	1.84157	0.065538	0.539366
AIM2	155.273	0.265591	0.480061	0.144255	1.84113	0.0656032	0.539584
ZFR	2187.13	-0.087913	-0.0904214	0.0477584	-1.84079	0.065653	0.539676
IL1RAP	325.167	0.22939	0.303764	0.124642	1.84039	0.0657106	0.539832
CCNG1	653.688	-0.179142	-0.205499	0.0973667	-1.83987	0.0657873	0.539991
RPL21	3870.83	-0.123201	-0.13053	0.0669667	-1.83973	0.0658073	0.539991
NMRK1	169.503	0.266642	0.507026	0.145	1.83891	0.0659286	0.540059
SNRPD2	967.985	-0.0970123	-0.100433	0.0527501	-1.83909	0.0659016	0.540059
WWC2	96.8482	0.259924	0.42581	0.141348	1.83889	0.0659316	0.540059
DNTTIP2	1771.8	-0.169392	-0.190978	0.0921775	-1.83767	0.0661114	0.540897
SERPINA1	27045.7	0.101195	0.105112	0.0550598	1.8379	0.0660769	0.540897
POTEE	427.62	0.0827882	0.0848799	0.04507	1.83688	0.0662279	0.541533
PFKFB4	582.298	-0.174621	-0.198761	0.0951056	-1.83607	0.0663468	0.542188
RP11-575L7.8	24.3936	-0.213959	-0.267508	0.116548	-1.8358	0.0663867	0.542197
GNB5	77.0262	-0.25628	-0.398306	0.139684	-1.83471	0.066548	0.543197
ADPRHL2	481.776	0.194962	0.232011	0.106291	1.83423	0.0666204	0.54347
STAB1	1014.62	0.177752	0.2038	0.0969241	1.83393	0.0666645	0.543512
ABTB2	31.5509	0.223782	1.1032	0.122238	1.8307	0.0671447	0.544401
BHMT2	19.6422	0.180457	0.208121	0.0985022	1.83201	0.0669506	0.544401
CDA	2024.47	-0.139319	-0.15041	0.0760414	-1.83215	0.0669292	0.544401
CTD-2516F10.2	38.3296	0.259121	0.690482	0.141963	1.82527	0.0679608	0.544401
DSE	633.263	0.175718	0.200789	0.0959652	1.83106	0.0670915	0.544401
EML3	449.339	0.150046	0.164446	0.0821073	1.82744	0.067633	0.544401
ESRG	18.4765	0.217352	0.276588	0.11894	1.8274	0.0676395	0.544401
FSD2	21.7116	0.176127	0.201514	0.0964274	1.82652	0.0677717	0.544401
GPR108	2215.45	-0.106895	-0.111609	0.0585006	-1.82724	0.0676639	0.544401
KLHL24	769.989	-0.148742	-0.162687	0.0814656	-1.82583	0.0678766	0.544401
MAN1B1	508.49	-0.150875	-0.165507	0.0826176	-1.82618	0.0678229	0.544401
MTCO3P12	6739.93	-0.179516	-0.206545	0.0982062	-1.82795	0.0675567	0.544401
MVD	178.248	-0.200403	-0.24155	0.109518	-1.82987	0.0672697	0.544401
PARGP1	79.1257	-0.202447	-0.24536	0.110658	-1.82948	0.0673278	0.544401
PDP1	1240.05	-0.155665	-0.171971	0.0852676	-1.82561	0.0679094	0.544401
PDXDC1	785.687	-0.136643	-0.147093	0.0747436	-1.82815	0.0675264	0.544401
RHD	47.1834	-0.226181	-0.295686	0.12364	-1.82935	0.0673473	0.544401
RNF216	886.486	-0.135878	-0.146157	0.0743963	-1.8264	0.0677897	0.544401
RP11-350N15.5	44.6179	-0.255681	-0.400263	0.14009	-1.82513	0.0679819	0.544401
RP11-805I24.1	39.4167	0.157455	0.174424	0.0860388	1.83004	0.0672435	0.544401
RP4-592A1.2	143.786	0.0906778	0.0934916	0.049668	1.82568	0.067899	0.544401
RTCB	1822.93	0.14987	0.16418	0.0819338	1.82916	0.0673754	0.544401
SELK	1017.77	0.132615	0.142092	0.0724894	1.82944	0.0673337	0.544401
SFXN5	411.591	-0.16133	-0.179775	0.0883275	-1.8265	0.0677755	0.544401
SLC7A1	67.9752	-0.263579	-0.465207	0.144356	-1.8259	0.067866	0.544401
TET2-AS1	26.8377	0.215229	0.271784	0.117693	1.82873	0.0674394	0.544401
TIPARP	248.049	0.248298	0.368354	0.135814	1.82823	0.0675151	0.544401
TOR3A	1333.07	-0.130937	-0.139961	0.0714532	-1.83249	0.0668791	0.544401
TRIM65	124.482	-0.210734	-0.261232	0.115113	-1.83067	0.0671491	0.544401
UBXN1	998.914	0.0945281	0.0977211	0.051682	1.82903	0.0673945	0.544401
ZNF383	143.964	-0.192452	-0.227592	0.105254	-1.82845	0.0674817	0.544401
NAPB	233.513	-0.219769	-0.281267	0.120486	-1.82402	0.0681497	0.545432
CHDH	33.0334	0.159901	0.178077	0.087793	1.82134	0.0685553	0.546304
FN3KRP	395.539	-0.168721	-0.190496	0.0926397	-1.82126	0.0685677	0.546304
FNDC3B	778.13	0.155014	0.171245	0.0850692	1.82221	0.0684233	0.546304
MT-TT	47.5965	0.219658	0.282509	0.120567	1.82188	0.0684738	0.546304
RAC1	3956.09	0.204033	0.249469	0.111957	1.82243	0.0683904	0.546304
SPIRE2	31.3047	0.164543	0.18462	0.0903468	1.82123	0.0685716	0.546304
TMEM181	187.171	-0.217331	-0.276052	0.119292	-1.82184	0.0684795	0.546304
TTC3	1357.17	-0.139622	-0.15094	0.0766293	-1.82204	0.0684487	0.546304
CX3CL1	18.1529	0.172487	0.196256	0.0947658	1.82014	0.0687371	0.547311
DLGAP4	572.372	0.131827	0.141235	0.0724435	1.81973	0.0688007	0.547504
DYNC2LI1	82.587	0.209152	0.259931	0.115003	1.81866	0.0689629	0.547913
XXbac-BPG299F13.17	151.964	0.192026	0.227803	0.105589	1.81862	0.0689697	0.547913
ZNF302	187.743	-0.217392	-0.27651	0.119517	-1.81892	0.0689238	0.547913
GPATCH3	231.926	0.183333	0.213306	0.100867	1.81757	0.06913	0.548251
SIN3A	500.582	-0.162667	-0.18189	0.0894907	-1.8177	0.0691098	0.548251
TRAPPC6A	331.025	-0.153019	-0.168552	0.0841881	-1.81759	0.0691274	0.548251
BCAP31P1	58.7551	0.107718	0.112651	0.0594249	1.81268	0.0698816	0.548804
CLEC6A	151.299	0.253531	0.402704	0.139952	1.81155	0.0700552	0.548804
CLK2	348.249	-0.166393	-0.187395	0.0918343	-1.81189	0.0700036	0.548804
CYB5R4	2884.74	-0.110362	-0.115656	0.0607897	-1.81547	0.0694521	0.548804
EEFSEC	358.586	-0.160829	-0.179459	0.0887826	-1.81149	0.0700643	0.548804
ERVK3-1	47.757	-0.250306	-0.377971	0.137951	-1.81445	0.0696081	0.548804
ESCO1	340.843	0.179797	0.207698	0.0989874	1.81636	0.0693145	0.548804
FAM20B	109.764	0.223793	0.293184	0.123221	1.8162	0.0693402	0.548804
FBXL19-AS1	36.8061	0.243454	0.354007	0.134277	1.81308	0.0698199	0.548804
MYL6B	24.5161	0.261669	0.477636	0.14444	1.81161	0.0700466	0.548804
PIGM	622.55	0.168812	0.191075	0.0931661	1.81194	0.0699949	0.548804
PJA1	113.726	-0.255427	-0.407065	0.140978	-1.81182	0.0700137	0.548804
PLXNA2	54.4535	0.262326	0.488363	0.144749	1.81228	0.0699427	0.548804
PPP4C	3616.23	0.0690281	0.0702552	0.0380828	1.81258	0.0698962	0.548804
PSMD4	2842.47	-0.0736796	-0.075177	0.0406256	-1.81362	0.0697358	0.548804
RP11-124D2.7	18.9753	0.165681	0.186467	0.0914587	1.81153	0.0700581	0.548804
SFXN4	214.582	-0.185856	-0.217255	0.1024	-1.81501	0.0695229	0.548804
SLC35A4	1040.33	0.148209	0.162306	0.0818037	1.81176	0.0700231	0.548804
SRD5A3	296.836	-0.199666	-0.241272	0.110073	-1.81395	0.0696859	0.548804
TBC1D30	23.0597	-0.22845	-0.858277	0.125825	-1.81561	0.0694298	0.548804
TMLHE	344.45	-0.163945	-0.183783	0.0903385	-1.81479	0.0695568	0.548804
TUFM	2388.23	-0.10179	-0.105878	0.0560304	-1.81669	0.0692643	0.548804
BTG3	49.0344	0.262471	0.498498	0.144986	1.81032	0.0702464	0.549304
CBL	513.563	0.178019	0.205191	0.0984001	1.80914	0.0704296	0.549304
CDKL5	60.3623	0.247286	0.371454	0.136686	1.80915	0.0704275	0.549304
FAM110B	93.2359	-0.253342	-0.396222	0.140021	-1.80931	0.0704025	0.549304
HDAC4	160.606	0.210649	0.264017	0.116442	1.80905	0.0704428	0.549304
MERTK	99.5796	0.263094	0.538639	0.145372	1.80979	0.0703279	0.549304
NLRP3	1879.77	0.164865	0.185391	0.0911146	1.80942	0.0703858	0.549304
SNHG17	186.914	0.235309	0.326265	0.129949	1.81078	0.0701743	0.549304
ATOX1	660.453	0.118561	0.125298	0.0655498	1.80871	0.0704959	0.549412
AC016907.3	45.2765	0.126205	0.134481	0.069813	1.80775	0.0706453	0.549526
CH17-472G23.4	68.5641	-0.210212	-0.262356	0.116293	-1.80761	0.070668	0.549526
RP11-274B21.3	19.957	0.234451	0.324134	0.129651	1.80832	0.0705563	0.549526
RP11-297L17.6	218.044	0.106491	0.111265	0.058899	1.80802	0.0706033	0.549526
CXCL11	19.3153	0.177667	1.74666	0.0984065	1.80544	0.0710058	0.549584
GEMIN2	86.7483	0.241066	0.34722	0.133509	1.80561	0.0709785	0.549584
LINC01136	18.7061	-0.253624	-0.399866	0.140489	-1.8053	0.071028	0.549584
MAPK1IP1L	2247.01	0.100789	0.104805	0.0557958	1.80638	0.0708586	0.549584
MORF4L1	3783.82	-0.0642852	-0.0652778	0.0355803	-1.80676	0.070799	0.549584
POU2F2	1219.97	0.142391	0.154787	0.0788503	1.80584	0.0709431	0.549584
RBX1	1450.59	0.121447	0.128748	0.0672117	1.80693	0.0707724	0.549584
RPUSD4	176.626	-0.226924	-0.30123	0.1257	-1.80529	0.0710296	0.549584
SEC61B	1565.92	0.0972805	0.100867	0.0538304	1.80717	0.0707364	0.549584
DICER1	1133.63	-0.119132	-0.125995	0.0660097	-1.80477	0.0711109	0.549604
QPRT	27.5864	-0.249553	-0.378699	0.138273	-1.80478	0.0711096	0.549604
ACOT8	384.706	0.155459	0.172263	0.0861681	1.80413	0.0712107	0.549823
BTBD2	97.3708	0.232349	0.318674	0.128801	1.80394	0.0712411	0.549823
RP11-196G11.5	25.8459	0.242152	0.352182	0.134262	1.80358	0.0712967	0.549823
SLC2A5	38.8694	0.257644	0.440058	0.142846	1.80365	0.0712869	0.549823
APOBR	278.79	0.189565	0.224453	0.105136	1.80305	0.0713807	0.550041
NR1H2	1816.41	0.110825	0.116284	0.0614705	1.8029	0.0714037	0.550041
CTD-2013N17.4	25.0802	0.159155	0.177479	0.0882987	1.80246	0.0714727	0.550269
ACP5	314.777	0.239236	0.341702	0.132777	1.80179	0.0715783	0.550778
ACTA2	54.1631	0.2611	0.505446	0.145164	1.79865	0.0720734	0.55339
C18orf32	126.252	0.123192	0.13094	0.068542	1.79732	0.0722855	0.55339
CHD1L	417.617	-0.170251	-0.193551	0.0947461	-1.79691	0.0723493	0.55339
CLN3	165.555	0.103238	0.107623	0.0574649	1.79654	0.0724093	0.55339
EXOSC8	431.82	-0.144017	-0.157015	0.0801762	-1.79626	0.0724536	0.55339
HCAR1	18.9532	0.163441	0.183753	0.0909955	1.79614	0.0724724	0.55339
IL12RB1	176.35	0.204371	0.252278	0.113766	1.79641	0.0724294	0.55339
MAU2	791.002	-0.154497	-0.171006	0.0859555	-1.7974	0.0722715	0.55339
NRL	28.723	0.260894	0.496961	0.14502	1.79902	0.0720153	0.55339
OAZ2	2130.54	-0.125092	-0.133214	0.0696083	-1.79708	0.072323	0.55339
PPP6R2	552.835	0.136328	0.147161	0.0758669	1.79694	0.072345	0.55339
RABGGTB	180.195	-0.201229	-0.245335	0.111872	-1.79874	0.0720595	0.55339
RP1-40G4P.1	125.133	-0.119158	-0.126077	0.0662806	-1.79777	0.0722127	0.55339
RP11-110H1.8	18.3903	0.169193	0.192129	0.0940774	1.79845	0.0721056	0.55339
CYP4A22-AS1	19.2198	0.166919	0.188836	0.0930296	1.79426	0.0727717	0.553858
HMG20A	269.477	-0.172514	-0.19705	0.096137	-1.79446	0.0727403	0.553858
HNRNPA0	295.428	-0.152777	-0.168726	0.0851435	-1.79435	0.0727581	0.553858
MAK	68.5931	-0.236884	-0.332428	0.131986	-1.79477	0.0726911	0.553858
MCTP2	137.115	0.260914	0.538288	0.145368	1.79485	0.0726775	0.553858
RP13-36G14.3	18.8833	0.221461	0.290677	0.123354	1.79532	0.0726023	0.553858
PTAFR	5821.29	0.135955	0.146745	0.0758325	1.79283	0.0730004	0.555296
SLC27A3	1352.12	0.164374	0.18518	0.0917002	1.79251	0.0730508	0.555377
2018-03-01	2184.37	0.1445	0.157782	0.0806575	1.79153	0.0732081	0.555968
TMPO-AS1	31.7256	-0.260034	-0.484392	0.145137	-1.79164	0.0731901	0.555968
EDF1	1052.49	0.0964455	0.100004	0.0538505	1.79099	0.0732952	0.556327
ZNF816	61.0905	-0.256664	-0.598464	0.143335	-1.79065	0.0733495	0.556436
COQ3	40.3382	0.258094	0.609927	0.144234	1.7894	0.0735498	0.55728
INTS6L	265.064	0.195933	0.236654	0.109509	1.7892	0.0735833	0.55728
MRPS16	822.042	-0.0940102	-0.097299	0.0525608	-1.7886	0.0736795	0.55728
NOL10	258.987	-0.195035	-0.234535	0.109029	-1.78883	0.0736425	0.55728
PABPC4	335.738	-0.190006	-0.225585	0.106173	-1.78959	0.07352	0.55728
RP11-256L6.5	20.4369	0.162789	0.183054	0.0910213	1.78847	0.0737001	0.55728
ANGEL2	376.29	0.149719	0.164799	0.0837408	1.78789	0.0737939	0.557687
MEF2C	1753.91	-0.109344	-0.114664	0.0611766	-1.78735	0.0738811	0.557742
RP11-216B9.8	20.7326	0.183341	0.214795	0.102576	1.78736	0.073879	0.557742
PDLIM7	713.626	0.159488	0.178333	0.0892719	1.78654	0.0740114	0.558425
GOLGA8B	30.3713	0.258922	0.49482	0.145049	1.78506	0.0742516	0.559632
RP11-66N24.4	54.9086	-0.155017	-0.171999	0.0868304	-1.78529	0.0742146	0.559632
ARRDC1-AS1	146.623	-0.172636	-0.197604	0.0967515	-1.78432	0.0743713	0.560214
C9orf3	40.2056	0.257414	0.606234	0.144283	1.78409	0.0744091	0.560214
DHX32	328.262	-0.180668	-0.210273	0.101295	-1.78358	0.0744911	0.56053
EEF1A1P8	158.213	-0.140347	-0.152493	0.0788054	-1.78093	0.0749244	0.562463
ITPRIPL2	71.7607	0.223231	0.297113	0.125308	1.78145	0.0748383	0.562463
RP9P	60.2089	-0.207695	-0.259664	0.1166	-1.78126	0.0748694	0.562463
TP53INP1	703.414	-0.181191	-0.211258	0.101748	-1.78077	0.0749494	0.562463
USO1	663.441	-0.172714	-0.197827	0.0969371	-1.78172	0.0747955	0.562463
ECE1	997.847	0.169847	0.193714	0.0954206	1.77998	0.0750786	0.562563
GLTSCR1L	246.036	0.178678	0.207504	0.100387	1.7799	0.0750928	0.562563
MGAT1	5422.72	0.0913663	0.0944092	0.0513378	1.77971	0.0751239	0.562563
UBE2G1	957.47	-0.121081	-0.128541	0.0680142	-1.78023	0.075039	0.562563
CACTIN	51.3637	-0.241878	-0.35523	0.135963	-1.77901	0.0752389	0.563123
DZIP3	59.7725	-0.256358	-0.448504	0.144162	-1.77826	0.0753607	0.56343
SNX17	3997.63	-0.0945087	-0.0978951	0.0531451	-1.77832	0.075352	0.56343
POM121	332.982	-0.139426	-0.151367	0.0784359	-1.77758	0.0754723	0.563825
PPRC1	296.094	0.204963	0.255177	0.115313	1.77745	0.0754943	0.563825
CTSA	3811.3	0.146636	0.160888	0.0825337	1.77668	0.0756209	0.563862
FRRS1L	21.6255	0.161134	0.18099	0.090693	1.77669	0.0756184	0.563862
HMGN2P8	124.305	0.099823	0.103859	0.0561824	1.77677	0.0756066	0.563862
KIAA1456	30.1848	0.199615	0.244569	0.112368	1.77644	0.0756607	0.563862
GDPD5	377.398	0.210158	0.266445	0.118372	1.7754	0.0758314	0.564231
PEMT	255.385	-0.169867	-0.193707	0.095666	-1.77563	0.0757947	0.564231
RP1-60N8.1	18.0438	0.244927	0.759616	0.137924	1.7758	0.0757652	0.564231
ATF4P3	93.4187	0.158768	0.177646	0.0894838	1.77427	0.0760183	0.56532
RIPK3	181.512	0.198598	0.242829	0.111984	1.77345	0.0761536	0.565724
TPM3P8	99.8571	0.107318	0.112421	0.0605071	1.77364	0.0761231	0.565724
DYRK1A	145.549	0.217041	0.28268	0.122418	1.77296	0.0762361	0.565735
LMNB1	301.548	0.222119	0.295592	0.125281	1.77297	0.076234	0.565735
R3HDM4	1323.15	0.100527	0.104676	0.0567082	1.7727	0.0762789	0.565752
TNKS	245.167	-0.187159	-0.221667	0.105597	-1.77239	0.0763295	0.565827
BID	3580.81	-0.075628	-0.0773316	0.0426813	-1.77192	0.0764072	0.566102
TUBG1	159.497	-0.196818	-0.239056	0.111125	-1.77114	0.0765382	0.566772
RP11-35G9.3	69.8127	0.222485	0.297016	0.125687	1.77015	0.0767022	0.567686
MTMR12	182.147	0.225331	0.305089	0.127351	1.76937	0.0768314	0.568341
ATF4	775.399	0.147036	0.161582	0.0831363	1.76861	0.0769587	0.568591
COQ9	458.436	-0.156676	-0.174749	0.0886347	-1.76766	0.0771171	0.568591
EMC6	22.0059	0.177648	0.206395	0.100474	1.7681	0.0770448	0.568591
RP11-296A18.5	167.655	-0.134946	-0.14579	0.07635	-1.76747	0.0771502	0.568591
TTYH2	609.113	-0.15559	-0.173226	0.0880222	-1.76762	0.0771249	0.568591
VNN3	152.962	-0.236944	-0.340072	0.134051	-1.76756	0.077135	0.568591
WASH7P	527.856	-0.11383	-0.120029	0.0643636	-1.76854	0.0769699	0.568591
CDCP1	29.0838	0.253248	0.440312	0.143358	1.76654	0.0773059	0.569438
DHX37	80.7251	-0.24612	-0.380588	0.139388	-1.76572	0.0774426	0.569595
IFI27L1	17.4883	0.251182	0.660447	0.142258	1.76568	0.0774496	0.569595
RP11-293M10.2	35.5936	-0.252342	-0.421793	0.142892	-1.76596	0.0774032	0.569595
AC009060.1	33.5708	0.166789	0.189669	0.0945292	1.76442	0.0776608	0.569625
CTC-366B18.4	17.1933	0.220523	0.292958	0.124996	1.76424	0.0776913	0.569625
RP11-240E2.2	74.2675	-0.251457	-0.415757	0.142514	-1.76444	0.0776577	0.569625
RP11-35J6.1	23.5536	-0.185636	-0.219475	0.105224	-1.7642	0.0776983	0.569625
RP13-631K18.2	20.7251	0.166475	0.189181	0.0943175	1.76505	0.0775559	0.569625
VPS36	1060.37	-0.137051	-0.148523	0.0776835	-1.76422	0.0776956	0.569625
IL10RB	1324.71	0.0981467	0.102036	0.0556574	1.76341	0.0778318	0.570119
TRAM1	4154.54	-0.0977592	-0.101596	0.0554406	-1.76331	0.0778474	0.570119
TMEM120B	51.2377	0.201278	0.249075	0.11419	1.76267	0.0779563	0.570617
ZNF799	57.5457	-0.251868	-0.421267	0.142911	-1.76241	0.0780008	0.570644
CACNA2D3	362.326	-0.221584	-0.294257	0.125746	-1.76215	0.0780441	0.570662
HLA-A	6617.26	0.149764	0.165418	0.0850178	1.76156	0.0781445	0.571097
ACSL3	656.525	0.173712	0.200436	0.0986814	1.76033	0.0783518	0.572313
RPS2P5	948.56	-0.142651	-0.155866	0.0810601	-1.75982	0.0784378	0.572342
SRRT	712.205	0.137242	0.148876	0.0779759	1.76006	0.0783977	0.572342
AHCYL2	273.402	-0.209812	-0.266523	0.119297	-1.75873	0.0786231	0.572497
CTD-2647E9.1	20.9973	0.229069	0.318419	0.130214	1.75918	0.0785475	0.572497
PPM1N	25.0437	0.254662	0.57596	0.144798	1.75874	0.0786224	0.572497
TRMT10C	299.766	0.171444	0.196927	0.0974443	1.7594	0.0785097	0.572497
ATP1B3	1974.13	0.107014	0.112176	0.0608944	1.75736	0.0788562	0.573378
RPL5P4	147.848	-0.166819	-0.189776	0.0949426	-1.75706	0.0789083	0.573378
SIRPD	66.12	0.210294	0.268863	0.119669	1.75729	0.0788686	0.573378
TES	2503.73	-0.13145	-0.141522	0.0748008	-1.75733	0.0788608	0.573378
NOC2LP1	23.8055	-0.170215	-0.194952	0.0968921	-1.75675	0.0789603	0.573458
AGAP12P	21.7097	-0.183529	-0.216376	0.104527	-1.7558	0.0791225	0.574195
PSMA5	1039.66	0.119188	0.126517	0.0678873	1.75567	0.079144	0.574195
MCL1	10897.9	0.196755	0.240738	0.1121	1.75517	0.0792301	0.574223
SC5D	168.747	0.238614	0.354572	0.135949	1.75518	0.079229	0.574223
ATP5A1P2	20.714	-0.16188	-0.182641	0.0923322	-1.75323	0.0795623	0.574254
ATPAF1	849.516	-0.161258	-0.181685	0.0919642	-1.75349	0.0795185	0.574254
FKTN	59.8956	-0.252022	-0.431677	0.143635	-1.7546	0.0793279	0.574254
FZD5	28.1741	0.245984	0.69957	0.140321	1.75301	0.0796001	0.574254
GNPNAT1	64.4189	0.219743	0.292382	0.125274	1.7541	0.0794141	0.574254
GPR65	581.75	0.18766	0.224072	0.107052	1.75299	0.0796045	0.574254
LINC00339	114.11	-0.179252	-0.209408	0.102247	-1.75313	0.0795791	0.574254
RPL21P3	26.697	-0.145392	-0.159601	0.0829112	-1.75358	0.0795023	0.574254
SIGMAR1	1392.89	-0.130581	-0.140486	0.0744816	-1.7532	0.0795685	0.574254
TRIM69	71.7713	0.22107	0.296252	0.126165	1.75223	0.0797334	0.574888
ASB14	19.1338	0.254356	0.515673	0.145367	1.74974	0.0801625	0.575009
CRLS1	566.597	0.146787	0.161625	0.0838753	1.75007	0.0801068	0.575009
HBD	22.2111	0.178611	1.5465	0.102092	1.74951	0.0802032	0.575009
HMGB1P37	74.8751	-0.0881005	-0.0909085	0.0503324	-1.75037	0.0800537	0.575009
L3MBTL2	263.218	-0.216214	-0.282561	0.123581	-1.74958	0.0801902	0.575009
LINC00894	22.6673	0.254617	0.516413	0.145368	1.75153	0.0798545	0.575009
MOCOS	28.1528	0.153648	0.171028	0.0877257	1.75146	0.0798669	0.575009
NDUFB3	1101.79	0.125796	0.134616	0.0719	1.74959	0.0801882	0.575009
RN7SL798P	17.2287	0.253063	0.463606	0.144512	1.75116	0.0799186	0.575009
RP11-490O6.2	21.5052	-0.24001	-0.3579	0.137082	-1.75085	0.079972	0.575009
ST13P3	28.2244	-0.156619	-0.175084	0.0894703	-1.75052	0.080029	0.575009
MT-ATP8	1700.36	-0.140824	-0.153667	0.0805307	-1.7487	0.0803423	0.575586
XYLT1	81.6552	-0.248543	-0.407133	0.142141	-1.74857	0.0803661	0.575586
ACADVL	4912.86	-0.10131	-0.105692	0.0579774	-1.74741	0.080566	0.576131
DYNC1H1	1008.9	0.109097	0.114657	0.062427	1.74759	0.0805345	0.576131
TMEM2	445.988	0.184435	0.218738	0.105526	1.74776	0.0805052	0.576131
RP11-1H8.5	19.8007	0.195806	0.239637	0.112074	1.74711	0.0806183	0.57621
CMKLR1	190.155	0.252102	0.457051	0.144328	1.74673	0.0806843	0.576388
BATF	159.709	0.190101	0.228913	0.108872	1.74609	0.0807951	0.576623
RP11-119D9.1	57.1322	0.225085	0.308919	0.128911	1.74605	0.0808019	0.576623
UBE2J1	2609.61	0.165586	0.188481	0.0948467	1.74583	0.0808411	0.576623
C20orf96	54.8513	-0.234851	-0.339329	0.134627	-1.74445	0.0810801	0.577803
PRDX6	1232.15	0.10095	0.105305	0.0578711	1.7444	0.0810894	0.577803
CDHR4	23.0445	0.156852	0.175728	0.0899709	1.74336	0.0812702	0.578501
LINC01126	42.9062	-0.249733	-0.585373	0.143233	-1.74354	0.0812393	0.578501
ACIN1	330.015	0.139856	0.152557	0.0802633	1.74246	0.081428	0.579329
CUTA	671.508	0.0973653	0.101262	0.0559123	1.74139	0.0816147	0.580104
PPFIA4	72.1507	0.251749	0.580039	0.14457	1.74136	0.08162	0.580104
C16orf13	563.357	-0.117233	-0.1243	0.0673596	-1.74041	0.0817873	0.580797
MS4A14	285.728	-0.208786	-0.266333	0.119969	-1.74033	0.0818006	0.580797
LINC01503	113.084	-0.195574	-0.239041	0.112393	-1.74009	0.0818437	0.580807
S100P	110.326	0.24682	0.409487	0.141867	1.7398	0.0818949	0.580876
AC005255.3	69.2575	0.136287	0.147984	0.0783748	1.73891	0.0820508	0.580974
ATG7	1632.93	-0.122889	-0.131157	0.0707058	-1.73803	0.0822049	0.580974
CLCF1	44.6385	-0.251981	-0.528308	0.145054	-1.73715	0.0823604	0.580974
EXOC6	514.038	0.1464	0.161368	0.0842515	1.73766	0.0822707	0.580974
ISCA2	827.942	0.127239	0.136556	0.0732574	1.73688	0.082408	0.580974
MLK7-AS1	17.9246	-0.248538	-0.418154	0.143082	-1.73703	0.0823811	0.580974
RPL7	2771.18	-0.113405	-0.119774	0.0652699	-1.73747	0.0823039	0.580974
SPHK1	369.188	0.198602	0.245811	0.114255	1.73823	0.0821698	0.580974
SUPT16HP1	50.9944	-0.140796	-0.153822	0.0810066	-1.73808	0.0821969	0.580974
THOC3	260.241	-0.180959	-0.21296	0.10409	-1.73848	0.0821265	0.580974
TRAPPC1	1520.17	0.0857254	0.0883431	0.0492912	1.73916	0.0820061	0.580974
TUBA1C	1231.03	0.152993	0.17045	0.0880556	1.73745	0.082307	0.580974
ARRDC3-AS1	50.3327	0.195552	0.239988	0.112651	1.73592	0.0825785	0.581217
CIC	124.393	0.182428	0.216036	0.105172	1.73458	0.0828157	0.581217
CLK1	883.839	-0.176961	-0.206488	0.101943	-1.73588	0.0825843	0.581217
GBP3	301.495	0.239076	0.365194	0.137807	1.73486	0.082765	0.581217
H2AFY2	33.9743	0.244497	0.677998	0.140955	1.73457	0.0828169	0.581217
PRRG4	189.812	0.171258	0.197625	0.0987086	1.73499	0.0827434	0.581217
RPL7P9	681.143	-0.112671	-0.118922	0.0649152	-1.73567	0.0826216	0.581217
WAPL	2021.65	-0.111057	-0.117026	0.0639892	-1.73557	0.0826407	0.581217
WASH5P	52.7217	-0.150037	-0.166307	0.0864899	-1.73474	0.0827873	0.581217
ADCK5	182.84	-0.198089	-0.244602	0.11436	-1.73215	0.0832461	0.581986
BAZ1A	1216.76	0.123609	0.132111	0.0713044	1.73354	0.0829999	0.581986
CIAPIN1	744.421	-0.129527	-0.139434	0.0747451	-1.73292	0.0831106	0.581986
COX6B2	18.6248	0.175994	0.205428	0.10155	1.73307	0.0830835	0.581986
DOT1L	86.4756	0.193816	0.236903	0.111905	1.73197	0.0832787	0.581986
NME6	331.207	-0.158011	-0.177613	0.0912147	-1.7323	0.0832207	0.581986
RAB3IP	160.243	0.206914	0.26412	0.119449	1.73224	0.0832316	0.581986
RP11-356N1.2	193.235	0.214725	0.282786	0.123949	1.73236	0.0832094	0.581986
[truncated: 37,012 more rows]

## Sheet: cMo-IFNpos-vs-HC
Supplemental Table S3. The combined analysis results of differentially expressed genes (DEGs) and differentially connected genes (DEGs) between IFNpos and IFNneg in classical monocytes (related to Figure 2C).
GENE	baseMean	log2FoldChange	lfcMLE	lfcSE	stat	pvalue	padj
LY6E	10081.6	2.19307	2.5423	0.145368	15.0864	1.99016e-51	3.74011e-47
IFI44L	4910.1	2.60364	3.4187	0.178434	14.5916	3.17613e-48	2.98445e-44
SIGLEC1	2411.22	2.57317	3.36622	0.177768	14.4749	1.74556e-47	1.09348e-43
IFI6	11629.8	2.26453	2.74275	0.159858	14.1659	1.4888e-45	6.99476e-42
ISG15	4318.23	2.12418	2.55726	0.158171	13.4296	4.0557e-41	1.52438e-37
RSAD2	1840.5	2.39991	3.17582	0.180156	13.3213	1.74103e-40	5.45321e-37
OASL	1900.18	2.09974	2.53791	0.159373	13.175	1.22254e-39	3.28216e-36
IRF7	3611.61	1.48909	1.6137	0.113214	13.1529	1.63872e-39	3.84955e-36
IFIT3	4299.25	2.15318	2.68567	0.167871	12.8264	1.1669e-37	2.43661e-34
IFI44	2141.08	1.91903	2.25281	0.150099	12.785	1.98752e-37	3.73515e-34
EIF2AK2	1770.14	1.48022	1.61302	0.11656	12.6992	5.97718e-37	1.02117e-33
CMPK2	2701.22	1.9706	2.35181	0.155581	12.6661	9.11367e-37	1.42728e-33
RNF213	2553.71	1.10379	1.15654	0.08861	12.4567	1.28564e-35	1.85854e-32
IFITM1	4055.5	2.22733	2.94646	0.180357	12.3496	4.897e-35	6.57352e-32
OAS2	2962.6	1.709	1.94707	0.138659	12.3252	6.62407e-35	8.29907e-32
MX1	6060.34	1.86946	2.20656	0.152011	12.2982	9.26459e-35	1.08818e-31
ZBP1	213.02	1.84233	2.18245	0.153132	12.031	2.44168e-33	2.69921e-30
MX2	2785.65	1.37011	1.49576	0.11765	11.6457	2.41402e-31	2.38772e-28
USP18	718.998	2.28806	3.40665	0.196408	11.6495	2.30817e-31	2.38772e-28
SHISA5	7084.29	0.899641	0.93169	0.0774278	11.6191	3.29566e-31	3.09677e-28
OAS3	3935.35	1.83636	2.21037	0.158336	11.5979	4.22308e-31	3.77925e-28
SERPING1	1781.34	2.01015	2.57008	0.173797	11.5661	6.12211e-31	5.22967e-28
LGALS3BP	1909.52	2.22331	3.26036	0.194998	11.4017	4.09965e-30	3.34977e-27
PML	1021.82	1.16378	1.24078	0.102408	11.3642	6.3052e-30	4.93724e-27
IFIT1	2072.11	2.02638	2.65877	0.179092	11.3147	1.10972e-29	8.34199e-27
EPSTI1	1586.99	1.80704	2.18783	0.160103	11.2868	1.52563e-29	1.10274e-26
IFI35	1729.39	1.17488	1.25693	0.10485	11.2053	3.84185e-29	2.67407e-26
IFIT1B	30.2222	2.1557	3.12997	0.193117	11.1627	6.20912e-29	4.16743e-26
IFITM3	14352.2	1.89449	2.38468	0.17036	11.1205	9.97118e-29	6.46167e-26
HERC5	832.309	1.81384	2.23805	0.165391	10.9669	5.51065e-28	3.45206e-25
DHX58	492.829	1.4123	1.57564	0.129191	10.9318	8.12058e-28	4.9229e-25
PARP9	3693.39	1.35373	1.50156	0.126313	10.7173	8.44766e-27	4.96115e-24
USP41	128.588	2.15061	3.35799	0.200775	10.7115	8.98707e-27	5.118e-24
DDX60	905.614	1.50822	1.72845	0.141188	10.6823	1.23144e-26	6.8066e-24
GMPR	281.156	2.05495	2.94325	0.192518	10.6741	1.34607e-26	7.02685e-24
SAMD9L	1599.14	1.5794	1.84199	0.147938	10.6761	1.31733e-26	7.02685e-24
RP4-725G10.3	147.944	1.84416	2.35068	0.173155	10.6503	1.73781e-26	8.82665e-24
PARP14	3946.93	1.18087	1.27513	0.111039	10.6347	2.05483e-26	1.01622e-23
HELZ2	237.312	1.46584	1.67008	0.138722	10.5667	4.25029e-26	2.0481e-23
TRIM22	5857.45	1.13708	1.22246	0.108184	10.5107	7.71553e-26	3.62495e-23
XAF1	728.004	1.38314	1.55881	0.134006	10.3214	5.63711e-25	2.58386e-22
C19orf66	559.594	0.846419	0.88178	0.0833439	10.1557	3.12415e-24	1.39791e-21
OAS1	5149.93	1.24469	1.37487	0.124177	10.0235	1.20176e-23	5.25224e-21
ETV7	226.286	1.97713	2.95827	0.197487	10.0114	1.3578e-23	5.79934e-21
SPATS2L	283.922	1.7221	2.18727	0.172573	9.97899	1.88378e-23	7.86707e-21
NAPA	1423.76	0.660581	0.677447	0.0662122	9.97672	1.92729e-23	7.8738e-21
BST2	2392.35	0.855105	0.893623	0.086272	9.91174	3.70155e-23	1.48007e-20
PHF11	1204.27	0.838802	0.875241	0.0848555	9.88506	4.8328e-23	1.89214e-20
BLVRA	3650.97	0.827802	0.862942	0.0839638	9.85904	6.26467e-23	2.40269e-20
IFIH1	779.411	1.34179	1.52135	0.136721	9.81401	9.79939e-23	3.6832e-20
ADAR	4016.45	0.773395	0.802366	0.0792627	9.75737	1.71542e-22	6.32115e-20
NEXN	255.076	1.64467	2.05584	0.168836	9.74121	2.0114e-22	7.26928e-20
SAMD9	936.471	1.23621	1.37512	0.127791	9.67363	3.90292e-22	1.38392e-19
IFITM9P	86.2797	1.32535	1.50489	0.137238	9.65731	4.57746e-22	1.59304e-19
RP11-396M11.1	345.869	1.03423	1.11035	0.107252	9.64299	5.26327e-22	1.79841e-19
IFIT2	4790.7	1.60093	1.98167	0.166432	9.6191	6.64097e-22	2.22864e-19
NCOA7	870.608	1.61761	2.01984	0.168639	9.59214	8.62785e-22	2.84462e-19
HSH2D	829.664	1.13378	1.2416	0.119476	9.4896	2.31917e-21	7.51452e-19
IFITM2	6889.06	0.99146	1.06088	0.104995	9.44296	3.62402e-21	1.15434e-18
LGALS9C	139.828	0.770136	0.801211	0.0820333	9.38809	6.10981e-21	1.91369e-18
PLSCR1	4011.72	0.981185	1.05089	0.105658	9.28638	1.59622e-20	4.91766e-18
BISPR	576.953	0.930464	0.992154	0.102542	9.07398	1.14746e-19	3.47811e-17
DDX60L	1280.01	1.0696	1.16966	0.11869	9.0117	2.02892e-19	6.05229e-17
LGALS9B	92.4215	0.780068	0.81614	0.0873029	8.93519	4.06485e-19	1.1936e-16
DRAP1	1046.53	0.592788	0.608088	0.066557	8.90647	5.26831e-19	1.52319e-16
TYMP	18799.6	0.886759	0.942193	0.0999334	8.8735	7.08804e-19	2.01827e-16
KLHDC7B	302.731	1.47208	1.8238	0.166727	8.82932	1.05314e-18	2.95397e-16
ISG20	383.71	1.35214	1.60238	0.153646	8.80038	1.36359e-18	3.76851e-16
LGALS9	1720.06	0.772655	0.808863	0.0878476	8.7954	1.42535e-18	3.88213e-16
UBE2L6	6239.58	0.793642	0.833126	0.0902592	8.79292	1.45726e-18	3.91233e-16
APOBEC3B	687.066	1.44635	1.78172	0.165258	8.75206	2.09497e-18	5.54519e-16
KIAA1958	660.935	1.32733	1.56514	0.151973	8.734	2.45815e-18	6.41612e-16
GBP1	1468.71	1.44919	1.79455	0.166656	8.69572	3.44634e-18	8.8722e-16
APOBEC3A	6693.54	1.39627	1.70743	0.163284	8.55116	1.21859e-17	3.09472e-15
TMEM123	5859.18	0.620311	0.639597	0.0726711	8.53586	1.39115e-17	3.48584e-15
TRIM14	1179.37	0.986233	1.07352	0.116003	8.50179	1.86695e-17	4.61651e-15
EEF1B2	1137.89	-0.598089	-0.615461	0.0704254	-8.49252	2.02208e-17	4.93518e-15
RBCK1	1587.42	0.643718	0.666007	0.0764215	8.42326	3.66147e-17	8.82179e-15
STAT1	8245.2	1.08016	1.20549	0.129468	8.34308	7.23828e-17	1.72189e-14
ZNFX1	1081.82	0.731443	0.765751	0.0878899	8.32226	8.63009e-17	2.02732e-14
DTX3L	1832.93	0.927125	1.00255	0.111977	8.27958	1.23607e-16	2.86783e-14
LGALS9DP	258.016	0.748933	0.787322	0.0914801	8.18684	2.68178e-16	6.14619e-14
APOL6	1049.94	1.00003	1.10153	0.122731	8.14817	3.69467e-16	8.36554e-14
DDX58	1150.66	1.11218	1.26803	0.139206	7.98951	1.35482e-15	3.03108e-13
LAP3	5848.95	1.05912	1.19128	0.133206	7.95098	1.85046e-15	4.09127e-13
HERC6	375.86	1.19464	1.40588	0.151355	7.89298	2.95043e-15	6.44738e-13
EEF1B2P3	124.596	-0.651271	-0.678151	0.0829557	-7.85083	4.13283e-15	8.92738e-13
EEF1B2P6	143.303	-0.634927	-0.659938	0.0811917	-7.82011	5.27793e-15	1.12714e-12
CUL1	1616.69	0.874554	0.947184	0.112968	7.74164	9.81456e-15	2.07242e-12
FBXO6	768.586	0.776992	0.826495	0.10078	7.70974	1.26071e-14	2.63251e-12
TOR1B	707.325	1.00239	1.12049	0.130268	7.69486	1.41647e-14	2.92524e-12
CCR1	2111.32	0.967068	1.07206	0.126124	7.66761	1.75228e-14	3.57941e-12
GBP1P1	162.035	1.36006	1.76451	0.177571	7.65921	1.87082e-14	3.78046e-12
ODF3B	1045.12	0.635646	0.661972	0.083037	7.65497	1.93353e-14	3.86561e-12
IFI27	2711.92	1.57977	8.27412	0.206586	7.64706	2.0562e-14	4.0676e-12
TAP1	2669.52	0.77538	0.826793	0.102563	7.56002	4.03019e-14	7.88951e-12
RPL5	5007.31	-0.578802	-0.599077	0.0768976	-7.52692	5.19521e-14	1.00653e-11
EIF4B	867.457	-0.853	-0.924241	0.113503	-7.51523	5.68094e-14	1.08941e-11
PARP10	873.317	0.852249	0.92388	0.11354	7.50618	6.08765e-14	1.15561e-11
MOV10	342.81	1.11573	1.30309	0.148683	7.50414	6.18353e-14	1.16207e-11
IL1RN	1206.43	0.884574	0.967445	0.118797	7.44611	9.61354e-14	1.78878e-11
STAT2	2097.94	0.759419	0.810159	0.102908	7.37962	1.58738e-13	2.92467e-11
NRIR	73.1459	1.53949	2.77024	0.209687	7.34185	2.1066e-13	3.80667e-11
SAMD4A	141.34	1.25441	1.57885	0.170848	7.34226	2.10025e-13	3.80667e-11
PNPT1	678.505	0.82346	0.89095	0.112342	7.32996	2.30216e-13	4.12043e-11
RP11-1K3.1	47.2333	1.23646	1.54474	0.168926	7.31951	2.48875e-13	4.41237e-11
ATP13A1	1507.62	0.582114	0.604288	0.0798948	7.28601	3.19267e-13	5.60746e-11
MT2A	814.169	1.17157	1.42717	0.16234	7.21673	5.32539e-13	9.26668e-11
GBP5	739.208	1.22994	1.54502	0.170462	7.21532	5.38087e-13	9.27731e-11
PHACTR2	747.015	0.667155	0.702263	0.0925816	7.20613	5.75645e-13	9.83463e-11
PLAC8	1466.39	1.20795	1.50766	0.168879	7.15277	8.50438e-13	1.42699e-10
TNFSF13B	5067.36	0.549963	0.56925	0.0768838	7.15317	8.47946e-13	1.42699e-10
RP11-273G15.2	14.8051	1.50914	2.92776	0.211392	7.13907	9.39614e-13	1.56267e-10
TRIM5	733.586	0.876735	0.966003	0.122915	7.13286	9.83067e-13	1.62059e-10
RP11-467L13.5	431.74	1.4753	2.51415	0.207712	7.1026	1.2243e-12	2.00072e-10
EIF3L	1438.63	-0.604299	-0.630808	0.0853351	-7.08148	1.42625e-12	2.31065e-10
GRN	30161.2	0.521673	0.538855	0.0746654	6.98681	2.81202e-12	4.51678e-10
EEF1A1P25	182.391	-0.42618	-0.435576	0.0617767	-6.89872	5.24738e-12	8.35713e-10
RPS3AP47	222.627	-0.512175	-0.529143	0.0749094	-6.83726	8.0722e-12	1.2748e-09
SP110	159.207	0.67879	0.72084	0.0995431	6.81905	9.16426e-12	1.4352e-09
IFIT5	536.486	0.949185	1.08333	0.139704	6.79424	1.08882e-11	1.69109e-09
B2M	278535	0.323557	0.327775	0.047907	6.75386	1.43962e-11	2.19958e-09
PARP12	1197.63	1.00104	1.16742	0.148211	6.75415	1.4367e-11	2.19958e-09
EEF1A1P22	111.904	-0.509011	-0.526233	0.0756616	-6.72746	1.72649e-11	2.61661e-09
TDRD7	689.37	0.852976	0.947676	0.127286	6.70126	2.06631e-11	3.10657e-09
RP11-234N17.1	35.9216	-0.617769	-0.650062	0.0923819	-6.68712	2.27607e-11	3.39478e-09
IFI16	2168.55	0.700763	0.749651	0.104871	6.68215	2.35459e-11	3.48424e-09
RUBCN	1322.76	0.49254	0.508437	0.07396	6.65955	2.74664e-11	4.03262e-09
ITGAE	429.954	-0.70196	-0.751528	0.105584	-6.64833	2.96445e-11	4.31868e-09
LRAT	24.7553	0.695733	0.744412	0.104836	6.63639	3.21454e-11	4.647e-09
LCP2	2349.02	0.395152	0.403379	0.0600773	6.5774	4.78739e-11	6.86789e-09
APOBEC3G	883.149	0.697881	0.74793	0.106135	6.57538	4.85301e-11	6.90929e-09
BATF2	114.581	1.24254	1.72928	0.189949	6.54147	6.09174e-11	8.60768e-09
CCL2	234.733	1.38385	3.20056	0.212337	6.51724	7.16131e-11	1.00435e-08
AXL	62.4778	1.32742	2.15977	0.205362	6.4638	1.02107e-10	1.42141e-08
SLC25A5	3773.31	-0.385188	-0.393104	0.0597224	-6.44965	1.12108e-10	1.54916e-08
GSTP1	13340.7	-0.329074	-0.33401	0.0512992	-6.41479	1.41016e-10	1.93438e-08
EIF4BP3	28.2993	-0.819189	-0.91105	0.128047	-6.39755	1.57887e-10	2.15013e-08
MYD88	9809.25	0.380483	0.388281	0.0596244	6.38134	1.75549e-10	2.35649e-08
PPM1K	257.259	0.886204	1.00944	0.138858	6.38207	1.7471e-10	2.35649e-08
CHMP5	1130.86	0.665964	0.712861	0.1053	6.32442	2.54188e-10	3.38792e-08
FCGR1B	820.132	0.815498	0.909455	0.129181	6.31286	2.73931e-10	3.62534e-08
RPL5P4	128.313	-0.548135	-0.573289	0.0870904	-6.29386	3.09668e-10	4.06964e-08
CNP	1312.25	0.527884	0.550243	0.0839044	6.2915	3.14423e-10	4.10343e-08
RPS3A	3185.2	-0.525163	-0.547134	0.0834907	-6.29008	3.17294e-10	4.11235e-08
MAFB	3349.56	0.814858	0.910247	0.129995	6.26839	3.64795e-10	4.69561e-08
EEF1A1	14731.5	-0.420474	-0.431531	0.0671822	-6.25871	3.88173e-10	4.96254e-08
CMTR1	794.157	0.702395	0.760091	0.112476	6.24487	4.24158e-10	5.38595e-08
HMGB1	4331.35	-0.208481	-0.209785	0.0334076	-6.24053	4.36086e-10	5.50024e-08
EEF1A1P19	735.933	-0.418519	-0.429538	0.067223	-6.22583	4.79004e-10	6.00129e-08
FCGR1CP	560.116	0.817873	0.916725	0.131634	6.21325	5.19013e-10	6.45948e-08
RPS3AP26	510.39	-0.536715	-0.560985	0.0865246	-6.20303	5.53856e-10	6.84777e-08
PSME2	7794.39	0.64534	0.689735	0.10424	6.19092	5.98136e-10	7.34691e-08
CD2AP	252.541	0.82717	0.932045	0.134085	6.16899	6.87293e-10	8.38721e-08
CTSL	522.849	0.945777	1.11948	0.15349	6.1618	7.19246e-10	8.72051e-08
EEF1B2P2	26.5229	-0.698709	-0.757138	0.113417	-6.16052	7.2507e-10	8.73477e-08
RPL15	6438.57	-0.356461	-0.363401	0.0581895	-6.12587	9.01882e-10	1.07956e-07
AC010468.1	261.884	-0.535982	-0.561011	0.0878072	-6.10407	1.03398e-09	1.22985e-07
RPS3AP5	445.716	-0.53078	-0.555118	0.0870758	-6.09561	1.09019e-09	1.28854e-07
AC007919.18	5.73617	1.21208	1.83452	0.198988	6.09121	1.12058e-09	1.31619e-07
ST3GAL5	493.548	0.666267	0.717546	0.109409	6.08971	1.13116e-09	1.32036e-07
EEF1A1P6	3032.64	-0.429577	-0.442173	0.0707351	-6.07303	1.25517e-09	1.45607e-07
EEF1A1P9	673.426	-0.424166	-0.436279	0.069858	-6.07183	1.26457e-09	1.45798e-07
EEF1A1P5	3530.28	-0.419975	-0.431744	0.0692386	-6.06562	1.31449e-09	1.5063e-07
RPL5P1	122.961	-0.53119	-0.556115	0.0879679	-6.03845	1.55605e-09	1.77229e-07
TCN2	912.71	0.906604	1.06423	0.150622	6.01907	1.75418e-09	1.98593e-07
SLC25A5P5	64.4874	-0.468321	-0.485343	0.0782233	-5.98698	2.13779e-09	2.40572e-07
SCO2	935.486	0.81095	0.916584	0.135502	5.98478	2.16686e-09	2.42392e-07
RPS3AP25	173.925	-0.509295	-0.531568	0.0852042	-5.97735	2.26792e-09	2.52196e-07
NMI	1826.66	0.593846	0.630507	0.0994171	5.97328	2.32533e-09	2.57059e-07
EIF4BP7	29.3284	-0.804525	-0.907467	0.134864	-5.96546	2.43943e-09	2.68095e-07
ANKRD22	227.583	1.22369	2.00529	0.206027	5.93945	2.85978e-09	3.12464e-07
RP11-609D21.3	15.0445	1.25734	2.48192	0.212018	5.93034	3.02304e-09	3.28393e-07
CECR1	4728.71	0.538956	0.566599	0.0915313	5.88822	3.90376e-09	4.21629e-07
RPS3AP6	867.246	-0.510296	-0.53349	0.0867245	-5.88411	4.00207e-09	4.29777e-07
OTOF	413.56	1.15589	7.06094	0.197393	5.8558	4.74724e-09	5.06903e-07
WAS	1186.4	0.312992	0.318131	0.053585	5.84104	5.18766e-09	5.50801e-07
ZC3HAV1	1328.99	0.526802	0.553122	0.0904543	5.82396	5.74707e-09	6.06767e-07
RPL5P9	76.4948	-0.505346	-0.52847	0.0869981	-5.8087	6.29595e-09	6.61004e-07
RPL5P3	31.6993	-0.555048	-0.586583	0.0958811	-5.78891	7.08429e-09	7.39639e-07
TMSB10	18557.5	0.306103	0.311008	0.0529619	5.77967	7.48468e-09	7.77124e-07
RP11-288L9.4	8.03272	1.2091	3.4416	0.209301	5.77687	7.61012e-09	7.85808e-07
RPLP0P6	514.936	-0.452018	-0.468553	0.0784557	-5.76144	8.33971e-09	8.56438e-07
MT2P1	28.6386	1.00761	1.29213	0.175242	5.74984	8.93276e-09	9.12355e-07
CAPN2	4990.77	0.389551	0.399996	0.0677785	5.74741	9.06191e-09	9.20543e-07
SRGAP2	669.422	0.502597	0.525943	0.0875156	5.74294	9.30446e-09	9.40101e-07
RPL5P28	26.7334	-0.632664	-0.682089	0.110239	-5.739	9.52364e-09	9.571e-07
UNC93B3	102.75	0.526048	0.55319	0.091761	5.7328	9.87834e-09	9.87466e-07
CXCL10	645.992	1.10651	1.57928	0.193625	5.71469	1.09904e-08	1.09282e-06
CTD-2095E4.5	75.0411	0.987687	1.25281	0.172926	5.7116	1.11919e-08	1.107e-06
LDLR	289.493	0.961567	1.19727	0.168435	5.70884	1.13751e-08	1.11923e-06
RP11-274E7.2	28.2447	0.748977	0.839358	0.131468	5.69703	1.2191e-08	1.19326e-06
FCGR1A	1103.58	0.765825	0.863793	0.134582	5.69039	1.26747e-08	1.23417e-06
PSME1	8129.27	0.291683	0.296058	0.0512855	5.68744	1.28958e-08	1.24923e-06
RP11-198M15.1	32.8504	0.712264	0.788925	0.125687	5.66696	1.4535e-08	1.4008e-06
HLA-E	22981.7	0.305113	0.310181	0.0538845	5.66236	1.49308e-08	1.4316e-06
RP13-977J11.5	7.60721	1.07412	1.49946	0.189809	5.65895	1.52304e-08	1.45292e-06
EEF1A1P11	833.394	-0.407658	-0.420146	0.0722088	-5.64555	1.64655e-08	1.56281e-06
RP1-71H24.1	18.5079	0.910252	1.10486	0.161281	5.64389	1.66254e-08	1.57006e-06
ATP10A	98.6015	1.14308	1.78101	0.202606	5.64188	1.682e-08	1.58049e-06
SOX4	539.939	-0.700183	-0.772922	0.124242	-5.63564	1.74405e-08	1.63065e-06
RPLP0	2369.24	-0.423159	-0.437277	0.0751593	-5.63016	1.80045e-08	1.67504e-06
EEF1A1P16	83.8276	-0.494698	-0.518052	0.088256	-5.60526	2.0794e-08	1.92504e-06
FANCL	94.9206	0.750025	0.844795	0.133926	5.60031	2.13971e-08	1.96873e-06
POLE3	1060.97	-0.358501	-0.367022	0.0640218	-5.59967	2.14756e-08	1.96873e-06
RTCB	1949.52	0.436901	0.452749	0.0781065	5.59365	2.22343e-08	2.02839e-06
DYNLT1	3130.05	0.487188	0.509616	0.0871593	5.58963	2.27558e-08	2.06594e-06
MTCO1P40	796.855	-1.12457	-1.69798	0.201325	-5.58584	2.32575e-08	2.10134e-06
MYL12A	7719.05	0.31217	0.317776	0.0559582	5.57862	2.42437e-08	2.17996e-06
SSB	1292.65	0.532911	0.563044	0.0956258	5.57288	2.50558e-08	2.24225e-06
SP100	3386.09	0.365258	0.374391	0.0655691	5.57058	2.53889e-08	2.2613e-06
PSME2P2	184.71	0.617454	0.666511	0.110901	5.56759	2.5828e-08	2.28955e-06
RP11-69M1.6	290.437	-0.397728	-0.409665	0.0715073	-5.56206	2.66602e-08	2.35223e-06
MYOF	566.147	0.793784	0.912659	0.142806	5.5585	2.72109e-08	2.37848e-06
PSMB8	5224.9	0.384192	0.394927	0.0691128	5.55891	2.71457e-08	2.37848e-06
RP13-36G14.3	21.6253	0.692638	0.766048	0.124776	5.55103	2.8399e-08	2.47085e-06
S100A11	16601.9	0.248574	0.251409	0.0448845	5.53808	3.05808e-08	2.64841e-06
RPS3AP49	43.3897	-0.586049	-0.627674	0.105842	-5.537	3.07697e-08	2.65255e-06
EEF2	1588.11	-0.423965	-0.438692	0.0765887	-5.53561	3.10147e-08	2.66146e-06
HYPK	586.818	0.430215	0.445664	0.0777423	5.53386	3.13251e-08	2.67587e-06
EIF3LP2	79.9023	-0.547882	-0.581377	0.0990946	-5.52887	3.22293e-08	2.71607e-06
RPL5P34	136.222	-0.517806	-0.5457	0.0936438	-5.52952	3.211e-08	2.71607e-06
VRK2	657.868	0.580547	0.621145	0.104991	5.5295	3.21144e-08	2.71607e-06
SQRDL	1287.3	0.345175	0.352969	0.0624542	5.52684	3.2605e-08	2.73547e-06
TNFSF10	8333.96	0.795089	0.917015	0.144056	5.51929	3.40366e-08	2.84289e-06
SLC31A2	3330.98	0.584471	0.626316	0.10607	5.51023	3.58368e-08	2.98e-06
CD244	1188.53	-0.459345	-0.478528	0.0834175	-5.50657	3.65884e-08	3.0291e-06
MARCKS	1323.87	0.659073	0.722234	0.119964	5.49394	3.93056e-08	3.23978e-06
EEF1A1P13	1163.3	-0.400108	-0.412603	0.0728651	-5.49107	3.99496e-08	3.27848e-06
EEF1A1P12	374.002	-0.408821	-0.422197	0.0744777	-5.48918	4.03809e-08	3.29947e-06
EXOC3L1	50.7783	1.0108	1.35636	0.184338	5.48344	4.17123e-08	3.38357e-06
FAM69A	77.7401	1.06082	1.51247	0.193468	5.4832	4.17702e-08	3.38357e-06
BLOC1S1	525.423	0.373132	0.383262	0.0681784	5.47287	4.42799e-08	3.56338e-06
UNC93B6	101.815	0.468379	0.489102	0.0855875	5.47252	4.43692e-08	3.56338e-06
ITGB7	228.261	0.799506	0.928126	0.146571	5.45475	4.90421e-08	3.92191e-06
IL4I1	143.951	0.822892	0.967263	0.151136	5.4447	5.18936e-08	4.13236e-06
RP11-553P9.1	81.612	-0.425832	-0.441327	0.0782447	-5.4423	5.25957e-08	4.1706e-06
RPL7P9	617.228	-0.329867	-0.336876	0.0606782	-5.43634	5.4385e-08	4.29436e-06
C5orf56	261.378	0.588907	0.633286	0.108425	5.43145	5.58987e-08	4.39541e-06
RPL7P1	455.541	-0.330417	-0.337478	0.0608443	-5.43053	5.6186e-08	4.3996e-06
CTC-451P13.1	173.003	-0.511173	-0.539148	0.0943437	-5.41821	6.01997e-08	4.69433e-06
TMA7	1626.53	-0.313342	-0.319372	0.0578663	-5.41492	6.13152e-08	4.76156e-06
RPL5P23	42.9632	-0.609076	-0.659396	0.112988	-5.39064	7.02063e-08	5.42685e-06
SORL1	1555.29	-0.544144	-0.578831	0.100954	-5.38999	7.04599e-08	5.42685e-06
TCF4	300.779	0.687005	0.763543	0.127511	5.3878	7.13261e-08	5.47115e-06
EIF3LP3	24.8305	-0.62098	-0.675034	0.115408	-5.38074	7.41818e-08	5.64413e-06
RHOG	4525.94	0.226015	0.228266	0.0420043	5.38077	7.41687e-08	5.64413e-06
RP11-111F16.2	18.1546	-0.7394	-0.839378	0.137675	-5.37062	7.84652e-08	5.94595e-06
CTA-384D8.36	84.2983	0.829026	0.983915	0.154444	5.36783	7.96915e-08	6.01463e-06
RPL3P4	234.286	-0.376795	-0.387714	0.0703398	-5.35678	8.47187e-08	6.3431e-06
SMCHD1	1572.66	0.425061	0.441012	0.0793445	5.35716	8.45387e-08	6.3431e-06
SP140	132.883	0.93847	1.20272	0.175337	5.35237	8.68075e-08	6.47371e-06
CLIC1P1	321.889	0.300108	0.305538	0.0561557	5.34421	9.08113e-08	6.74552e-06
RPL7	2510.25	-0.331056	-0.338404	0.0619649	-5.34264	9.16026e-08	6.77751e-06
RPL15P3	1460.03	-0.315619	-0.322005	0.0592758	-5.32459	1.01183e-07	7.45696e-06
RAB8A	1433.28	0.298448	0.303841	0.0561252	5.31754	1.0518e-07	7.72131e-06
AC007326.1	26.3202	0.570967	0.613367	0.107761	5.29846	1.16785e-07	8.53986e-06
RP11-100N21.1	340.162	-0.311856	-0.318101	0.0589857	-5.28698	1.24352e-07	9.05794e-06
LRRC75A-AS1	1310.09	-0.535667	-0.570119	0.101352	-5.28519	1.25571e-07	9.11142e-06
EEF1A1P24	86.2735	-0.417543	-0.433106	0.0791491	-5.2754	1.32469e-07	9.57497e-06
RPL3	3349.4	-0.335079	-0.342933	0.0636004	-5.26851	1.37537e-07	9.90317e-06
RPL21P120	58.3726	-0.396179	-0.409413	0.075222	-5.2668	1.38822e-07	9.95753e-06
MLKL	1213.7	0.432485	0.449991	0.0821704	5.26327	1.41512e-07	1.01119e-05
GBP4	1085.05	0.868163	1.06672	0.164979	5.26226	1.42298e-07	1.01296e-05
VAMP5	1299.26	0.702038	0.790044	0.133549	5.25677	1.46607e-07	1.03969e-05
EEF1A1P4	252.07	-0.41453	-0.429923	0.0790072	-5.24674	1.54817e-07	1.08837e-05
HESX1	32.1606	1.10151	2.9109	0.20996	5.24627	1.55208e-07	1.08837e-05
QPRT	23.0457	-0.842355	-1.0172	0.160546	-5.24682	1.54747e-07	1.08837e-05
MYL12BP1	111.858	0.332464	0.340234	0.0634911	5.23639	1.63744e-07	1.14396e-05
ADARB2	14.6776	0.653228	0.722298	0.12477	5.23547	1.64563e-07	1.14542e-05
MS4A4A	508.918	0.907878	1.16052	0.174813	5.19341	2.06474e-07	1.43183e-05
C16orf74	145.665	-0.771917	-0.90013	0.148781	-5.18826	2.12266e-07	1.46659e-05
RP5-1174J21.1	35.139	-0.534444	-0.570232	0.103172	-5.18011	2.2176e-07	1.52657e-05
RPL7P23	298.756	-0.318507	-0.325534	0.061776	-5.15583	2.52506e-07	1.73187e-05
SASH3	3277.54	0.29779	0.303581	0.0581406	5.1219	3.02478e-07	2.06708e-05
CYSLTR1	788.013	0.587979	0.638829	0.114962	5.11455	3.14493e-07	2.1414e-05
CBR1	1152.54	0.445851	0.466522	0.0874464	5.09857	3.42235e-07	2.32189e-05
KMO	219.805	0.742094	0.859255	0.145618	5.09618	3.46574e-07	2.34287e-05
CTA-85E5.6	104.847	-0.487844	-0.515436	0.09576	-5.09444	3.49771e-07	2.356e-05
PSMB9	4061.5	0.602061	0.658211	0.118635	5.0749	3.87708e-07	2.60222e-05
AP5B1	1434.97	0.435442	0.454896	0.0859798	5.06447	4.09538e-07	2.72608e-05
EIF1P7	179.487	-0.393033	-0.407083	0.0776129	-5.06402	4.10514e-07	2.72608e-05
RP11-867G23.3	2776.31	0.651381	0.725531	0.12861	5.06478	4.08873e-07	2.72608e-05
KLHDC3	1049.4	-0.392086	-0.406105	0.0776288	-5.05079	4.39995e-07	2.91156e-05
MRPS18C	380.13	0.44977	0.471592	0.089273	5.03814	4.70069e-07	3.09965e-05
C2	87.1474	0.875231	1.11917	0.174901	5.00415	5.61082e-07	3.68686e-05
RAB4A	814.595	-0.398516	-0.413581	0.0796561	-5.00296	5.64565e-07	3.69682e-05
IL15	523.999	0.608794	0.66929	0.121762	4.99987	5.73698e-07	3.74358e-05
ACSL1	3291.84	0.546325	0.588457	0.109518	4.98847	6.08582e-07	3.95747e-05
JAK2	2398.12	0.494624	0.525071	0.0993	4.98111	6.32198e-07	4.09686e-05
GPR183	551.777	-0.95603	-1.33891	0.192443	-4.96785	6.76984e-07	4.37201e-05
FFAR2	203.722	0.912672	1.22004	0.183808	4.96536	6.85722e-07	4.41328e-05
RPL7P32	184.492	-0.324757	-0.332841	0.0654417	-4.96255	6.95739e-07	4.46246e-05
EIF1P3	150.233	-0.354534	-0.365177	0.0715075	-4.95799	7.12245e-07	4.55279e-05
RNF181	1558.35	0.222118	0.224642	0.0448096	4.95693	7.16163e-07	4.56232e-05
RPS4X	2089.97	-0.361246	-0.372544	0.0729116	-4.95458	7.24877e-07	4.60223e-05
NAP1L1	958.047	-0.42414	-0.442953	0.0857471	-4.94641	7.55944e-07	4.78332e-05
PID1	737.295	-0.81745	-1.00276	0.165294	-4.94543	7.59751e-07	4.79127e-05
EEF1A1P33	41.5112	-0.447196	-0.469487	0.0904467	-4.9443	7.64165e-07	4.803e-05
RNASE1	150.981	1.04592	1.98168	0.211686	4.9409	7.77643e-07	4.87142e-05
TRIM25	528.974	0.595164	0.653151	0.12079	4.92728	8.3382e-07	5.20597e-05
CTB-63M22.1	253.238	-0.415217	-0.432961	0.0843008	-4.92541	8.4182e-07	5.23852e-05
OGFR	1226.36	0.370036	0.382444	0.0752988	4.91424	8.91284e-07	5.52802e-05
CLIC1	13656.2	0.247195	0.250758	0.0503095	4.91348	8.94717e-07	5.53106e-05
CHST12	384.934	0.409651	0.426799	0.0834618	4.90825	9.18925e-07	5.66208e-05
POMP	2010.8	0.334027	0.343124	0.0682809	4.89195	9.98405e-07	6.13171e-05
GNG5	3382.63	0.24724	0.250845	0.0505937	4.88676	1.02507e-06	6.26991e-05
SLC25A5P3	53.7029	-0.397827	-0.413559	0.0814172	-4.88628	1.02758e-06	6.26991e-05
CST3	26254.2	0.255055	0.259027	0.0522301	4.8833	1.04325e-06	6.3449e-05
EMP1	150.679	1.0295	1.90878	0.211255	4.87325	1.09779e-06	6.6551e-05
GBP2	1928.82	0.625627	0.696589	0.128433	4.87124	1.10898e-06	6.70128e-05
EEF1A1P8	141.322	-0.411116	-0.428856	0.0846797	-4.85495	1.20416e-06	7.25196e-05
RPL10	2889.38	-0.331314	-0.340324	0.0682598	-4.85372	1.21168e-06	7.25196e-05
SLFN5	530.182	0.839545	1.06427	0.172957	4.85406	1.20956e-06	7.25196e-05
EIF4A2P4	11.465	-0.62287	-0.693761	0.128574	-4.84445	1.26964e-06	7.57474e-05
MT1P1	5.82761	0.950935	1.39632	0.196656	4.83552	1.32796e-06	7.89756e-05
TSPAN3	1177.91	-0.471082	-0.498818	0.0974581	-4.83369	1.34027e-06	7.94566e-05
FAM46A	1217.63	0.453699	0.478366	0.0939695	4.82815	1.37808e-06	8.14412e-05
RP11-3D23.1	42.9939	0.557548	0.606558	0.115778	4.81568	1.46698e-06	8.64232e-05
RP11-583F2.1	45.6714	0.601712	0.665701	0.125134	4.80853	1.52044e-06	8.92929e-05
ARHGDIA	1852.95	0.292562	0.298829	0.0609077	4.80336	1.56028e-06	9.13468e-05
SCARB2	1057.07	0.463953	0.490932	0.0968285	4.79149	1.65544e-06	9.66171e-05
MRPL48	292.421	-0.405087	-0.422516	0.0845632	-4.79035	1.66489e-06	9.68679e-05
RPS6	3272.57	-0.268498	-0.273338	0.0560708	-4.78855	1.67987e-06	9.74375e-05
EIF2S3	3251.38	-0.415509	-0.4345	0.0869366	-4.77945	1.75773e-06	0.00010164
U3	92.1115	-0.852609	-1.10357	0.17852	-4.77598	1.78831e-06	0.000103091
RPL4P4	458.743	-0.289247	-0.295418	0.0607956	-4.7577	1.95808e-06	0.000112533
RPL3P2	169.319	-0.331301	-0.340746	0.0698105	-4.74572	2.07762e-06	0.000119039
CEP85L	725.414	-0.52043	-0.560578	0.109682	-4.74488	2.08632e-06	0.000119102
RPL21P39	81.9682	-0.363566	-0.376205	0.0766308	-4.74439	2.0914e-06	0.000119102
PCMTD2	862.834	-0.434656	-0.456991	0.0916958	-4.74019	2.13515e-06	0.000121045
SESN3	175.675	-0.584157	-0.643673	0.123243	-4.73988	2.13841e-06	0.000121045
GSTO1	3404.56	0.317434	0.325752	0.067043	4.73478	2.19295e-06	0.00012376
2018-03-01	2286.41	0.380735	0.395462	0.0804733	4.73119	2.23202e-06	0.000125588
TANGO2	559.228	-0.320804	-0.329416	0.0678348	-4.72919	2.25419e-06	0.000126457
EEF1A1P7	44.8013	-0.439036	-0.462311	0.0929721	-4.72223	2.33268e-06	0.00013047
RPL5P12	47.9099	-0.447884	-0.472779	0.0949809	-4.71551	2.41101e-06	0.000134451
GCH1	918.973	0.539269	0.585449	0.114499	4.70981	2.47951e-06	0.000137862
FAM65B	1737.88	0.371344	0.385109	0.0789016	4.70642	2.52104e-06	0.000139758
PNRC1	3249.14	-0.413859	-0.433267	0.0879633	-4.70491	2.53982e-06	0.000140385
CATSPER1	226.61	-0.52584	-0.568457	0.112014	-4.69443	2.67356e-06	0.000146485
EEF1A1P29	64.6933	-0.403463	-0.421436	0.0859325	-4.69511	2.66457e-06	0.000146485
TRIM38	1802.76	0.334032	0.343956	0.0711485	4.69485	2.66802e-06	0.000146485
LY96	756.203	0.396574	0.413644	0.0845233	4.69189	2.70688e-06	0.000147879
APOL2	517.308	0.466801	0.495885	0.0998351	4.67572	2.92922e-06	0.000159562
IL15RA	398.48	0.693005	0.80825	0.148371	4.67076	3.00082e-06	0.000162989
RPLP1	6347.21	-0.315941	-0.324397	0.067743	-4.66382	3.10394e-06	0.000167216
2018-09-02	4426.26	-0.295194	-0.302043	0.0632937	-4.66387	3.1032e-06	0.000167216
USP30-AS1	33.5839	0.845254	1.11479	0.18124	4.66373	3.10532e-06	0.000167216
TBC1D2	1209.12	0.407076	0.425916	0.0873819	4.65858	3.18399e-06	0.000170962
EIF3LP1	13.0013	-0.622162	-0.700321	0.133788	-4.65036	3.3135e-06	0.000177409
DYSF	1149.08	0.75482	0.918761	0.162371	4.64873	3.3399e-06	0.00017781
GPATCH11	97.4273	-0.798208	-1.00312	0.171692	-4.64907	3.33428e-06	0.00017781
RPL23	3908.23	-0.335602	-0.345882	0.0722016	-4.64813	3.34963e-06	0.000177824
FAM8A1	556.511	0.657097	0.753291	0.141663	4.63845	3.51036e-06	0.000185832
CLU	509.192	0.981691	2.27264	0.211837	4.63419	3.5834e-06	0.000189165
RP11-371A22.1	918.742	-0.336365	-0.34683	0.0727372	-4.62438	3.75715e-06	0.000197782
EIF3H	1665.51	-0.221966	-0.224881	0.0480869	-4.61594	3.91318e-06	0.00020542
GSDMD	1161.89	0.40798	0.427498	0.0887027	4.59942	4.23677e-06	0.000221787
RPS4XP3	58.6906	-0.394594	-0.412124	0.085805	-4.59873	4.25078e-06	0.000221902
TCIRG1	5852.53	0.242464	0.246317	0.0527487	4.59658	4.29477e-06	0.000223578
FPR2	1712.19	0.602432	0.674748	0.131343	4.58673	4.50245e-06	0.000233742
KRT10	546.483	-0.562864	-0.619678	0.122772	-4.58462	4.54822e-06	0.000235468
AC097523.1	212.791	-0.296707	-0.303931	0.0647672	-4.58114	4.62456e-06	0.000238535
RPL15P2	207.145	-0.288792	-0.295437	0.0630449	-4.58074	4.63332e-06	0.000238535
SRGAP2C	1238.95	0.386571	0.403157	0.0844006	4.58019	4.64555e-06	0.000238535
RPL4	3540.4	-0.250639	-0.254939	0.0547475	-4.57809	4.69241e-06	0.000240284
SECTM1	1067.79	0.517122	0.560124	0.113092	4.57258	4.8176e-06	0.000246025
NT5C3AP1	94.3661	0.466068	0.496729	0.102222	4.55938	5.13045e-06	0.000261292
ICAM2	603.585	0.372375	0.387253	0.0816847	4.55869	5.14726e-06	0.000261439
PTPA	488.075	0.409473	0.429659	0.0899122	4.55414	5.25999e-06	0.000266445
UNC93B8	70.7275	0.387599	0.404565	0.0851792	4.55039	5.35461e-06	0.000270509
IFI30	60851.9	0.228992	0.23231	0.0504317	4.54064	5.60836e-06	0.000282568
CTSD	7021.03	0.415669	0.437018	0.0915989	4.53792	5.6811e-06	0.000285468
SPINT2	1161.52	-0.29156	-0.29855	0.0642914	-4.53497	5.7611e-06	0.000288715
AC079305.10	11.4688	-0.901842	-1.33376	0.198944	-4.53314	5.81123e-06	0.000290453
SLC17A4	11.8267	0.736807	0.89869	0.162617	4.53094	5.87214e-06	0.000292719
CXCR2P1	462.725	0.872316	1.23804	0.193171	4.51578	6.30853e-06	0.000313641
GSTO3P	64.5938	0.360815	0.374585	0.0799198	4.51471	6.34043e-06	0.000314395
AC004076.7	12.0574	-0.946938	-1.64297	0.210028	-4.50863	6.5247e-06	0.000322681
AC006483.5	212.17	0.240853	0.244837	0.0537668	4.47959	7.47874e-06	0.000368892
CTD-2192J16.15	373.388	-0.307637	-0.316116	0.0686989	-4.47804	7.53311e-06	0.000370601
RP11-118H4.1	34.636	-0.427617	-0.451827	0.0957203	-4.46736	7.91901e-06	0.000388569
MYL12AP1	257.356	0.281714	0.288207	0.0630822	4.46583	7.97605e-06	0.000390349
FAS	657.406	0.513705	0.558279	0.115135	4.46177	8.12846e-06	0.000396774
AC005150.1	11.8041	0.858815	1.21536	0.192546	4.46032	8.18387e-06	0.000398444
RAB37	454.389	-0.50952	-0.552822	0.114289	-4.45816	8.26667e-06	0.000401435
EEF1A1P14	104.434	-0.342981	-0.35504	0.0770339	-4.45233	8.49426e-06	0.000411424
RP11-183G22.1	83.6406	-0.350543	-0.363457	0.0787708	-4.45017	8.58021e-06	0.000414519
DANCR	70.0212	-0.816724	-1.08548	0.183784	-4.44394	8.83261e-06	0.000425619
KLHDC2	478.125	-0.329443	-0.340129	0.0741724	-4.44158	8.92987e-06	0.000429205
CTD-2283N19.1	15.1659	0.502388	0.544356	0.11321	4.43765	9.09463e-06	0.000436009
TTC39B	135.557	0.738906	0.91357	0.166735	4.43161	9.35316e-06	0.000447262
YME1L1	2087.68	0.28946	0.296654	0.0653813	4.42727	9.54352e-06	0.000455206
RBX1	1456.5	0.256611	0.261572	0.0579832	4.42561	9.61681e-06	0.000457541
RPL5P22	22.7257	-0.46995	-0.503735	0.106284	-4.42166	9.79474e-06	0.000464829
TCF7L2	308.642	0.555954	0.615953	0.125922	4.41508	1.00973e-05	0.00047798
TRPV2	679.936	0.339319	0.351209	0.0768702	4.41418	1.01396e-05	0.000478777
RNASE2	1371.87	0.752367	0.944317	0.170625	4.40948	1.03619e-05	0.000488047
PSMA6P1	185.294	0.259207	0.264373	0.0588179	4.40694	1.04841e-05	0.00049257
EPHB2	112.068	0.895372	1.39968	0.203216	4.406	1.05296e-05	0.000493473
UBA7	1387.6	0.335375	0.346899	0.0761681	4.40309	1.06721e-05	0.000498909
RPS14	4276.97	-0.264107	-0.269596	0.0600396	-4.39888	1.08809e-05	0.000506628
RTP4	121.283	0.854673	1.22356	0.194302	4.39868	1.08912e-05	0.000506628
USP27X	22.0191	0.756818	0.956485	0.172243	4.3939	1.11336e-05	0.000516629
ADAMTS2	77.106	0.837266	4.17159	0.190641	4.39185	1.12389e-05	0.000518951
ERVK-28	28.0163	0.52149	0.57024	0.118731	4.3922	1.12207e-05	0.000518951
NKG7	145.574	0.802967	1.06775	0.182932	4.38944	1.13644e-05	0.00052346
IGHEP2	281.881	0.624657	0.717686	0.142567	4.3815	1.17862e-05	0.000540621
RP11-59N23.3	9.25271	0.825576	1.13485	0.18843	4.38135	1.17945e-05	0.000540621
NHLRC2	229.85	0.516131	0.563455	0.117833	4.3802	1.18572e-05	0.000542171
ACOT9	1198.29	0.286442	0.293614	0.0656148	4.36551	1.26829e-05	0.000578518
LYSMD2	1015.44	0.4834	0.521686	0.110785	4.36341	1.28049e-05	0.00058126
TBL2	449.525	0.468844	0.503418	0.107439	4.36383	1.27805e-05	0.00058126
EIF4BP6	38.7716	-0.597906	-0.677578	0.137064	-4.36225	1.28733e-05	0.000582959
ZNF101	133.269	0.606408	0.690794	0.139038	4.36146	1.29198e-05	0.000583657
RP4-612B18.1	39.3195	-0.411541	-0.434231	0.0946516	-4.34795	1.37415e-05	0.000619288
IRF9	27.1381	0.600278	0.682737	0.138338	4.33922	1.42989e-05	0.000642868
UNC93B5	67.5227	0.358689	0.373562	0.0830818	4.3173	1.57947e-05	0.000708422
PRR13	4712.35	0.14491	0.145825	0.0335775	4.31567	1.59116e-05	0.000711968
AC000089.3	78.6237	-0.330894	-0.34247	0.0768484	-4.3058	1.66383e-05	0.000742717
RP11-496N12.9	5.21672	0.824098	1.15932	0.191517	4.30301	1.68497e-05	0.000750371
EIF1	10544.8	-0.309764	-0.319205	0.0720305	-4.30046	1.70447e-05	0.000755473
RPL5P5	21.7508	-0.474351	-0.511497	0.110298	-4.30063	1.7031e-05	0.000755473
ALOX12-AS1	103.798	-0.553197	-0.615953	0.128706	-4.29813	1.72248e-05	0.000761659
MT-ATP6	12825.3	-0.360671	-0.376003	0.0840961	-4.2888	1.79641e-05	0.000792488
CD302	1051.72	-0.28766	-0.295212	0.0671169	-4.28595	1.81957e-05	0.000800823
RPL36AL	1732.13	0.204365	0.207003	0.0476886	4.2854	1.82411e-05	0.000800944
TPMT	808.972	0.396242	0.417032	0.092488	4.28425	1.83358e-05	0.00080323
GTPBP2	185.971	0.552794	0.616455	0.129234	4.27748	1.8902e-05	0.000826106
TRIM26	830.328	0.406784	0.429529	0.0951627	4.27461	1.9147e-05	0.000834872
TMSB10P1	92.2665	0.313195	0.323133	0.0733786	4.26821	1.97048e-05	0.000855225
TPT1	3737.18	-0.289291	-0.297042	0.0677774	-4.26825	1.97013e-05	0.000855225
SQLE	260.058	0.768558	1.00706	0.180169	4.26576	1.9922e-05	0.000862658
CYB561A3	786.393	-0.353832	-0.368465	0.0830337	-4.2613	2.03238e-05	0.000876816
PSMB3	3395.57	0.217237	0.220455	0.0509815	4.2611	2.03423e-05	0.000876816
ASB13	479	-0.482739	-0.522936	0.113316	-4.26012	2.04313e-05	0.000878641
AC092155.1	74.7179	-0.333172	-0.345274	0.0782255	-4.25912	2.05233e-05	0.000880579
CC2D1B	128.405	0.518366	0.569944	0.121843	4.25439	2.09617e-05	0.00089734
STOM	1389.69	0.437214	0.466468	0.103011	4.24435	2.19228e-05	0.000936351
AGRN	17.3343	0.894508	1.63168	0.21092	4.24098	2.22549e-05	0.000948381
TRIM21	1795.16	0.491085	0.534326	0.115853	4.23886	2.24653e-05	0.000955183
CCL8	40.9386	0.825895	3.44119	0.194948	4.23649	2.27039e-05	0.000958818
RPS2	4449.3	-0.296134	-0.304599	0.0698857	-4.2374	2.26121e-05	0.000958818
ZNF749	7.02986	-0.880607	-2.27969	0.207859	-4.23655	2.26976e-05	0.000958818
ZCCHC2	89.4342	0.829118	1.20223	0.195882	4.23274	2.30862e-05	0.00097278
RP11-572P18.1	273.981	-0.278496	-0.285513	0.065842	-4.22976	2.33942e-05	0.00098355
GLULP4	153.347	0.402148	0.42462	0.0951026	4.22857	2.35184e-05	0.0009854
RPS5	1310.16	-0.29715	-0.305743	0.0702759	-4.22833	2.35431e-05	0.0009854
RABGAP1L	1331.48	0.400551	0.422821	0.0949196	4.2199	2.44407e-05	0.0010207
CTC-575D19.1	299.733	-0.349551	-0.363929	0.0828466	-4.21926	2.45109e-05	0.00102136
RPL7P19	93.5115	-0.279946	-0.287114	0.0663595	-4.21863	2.45796e-05	0.00102196
MAPKAPK3	4121.54	-0.208847	-0.211766	0.0495678	-4.21337	2.51589e-05	0.00104305
UBE2L3	1440.95	0.24574	0.250551	0.0583286	4.21302	2.5198e-05	0.00104305
UNC93B1	3555.25	0.3196	0.330496	0.0758858	4.2116	2.53572e-05	0.00104734
RP11-823E8.3	70.1978	0.613059	0.7099	0.145722	4.20704	2.58742e-05	0.00106635
SLC27A1	439.579	-0.413242	-0.438019	0.0982428	-4.20633	2.59547e-05	0.00106732
HIST2H2AA3	444.523	0.493788	0.538713	0.117434	4.20481	2.61301e-05	0.00106986
SHOX	46.5666	0.323809	0.335203	0.0770054	4.20502	2.61061e-05	0.00106986
RPS3AP43	47.6008	-0.451096	-0.484225	0.107355	-4.20192	2.64662e-05	0.00108126
MKKS	708.975	-0.507102	-0.556245	0.120731	-4.20027	2.66595e-05	0.0010821
NIP7	224.567	0.560308	0.630272	0.133386	4.20065	2.66146e-05	0.0010821
TRIM56	406.728	0.403149	0.426123	0.0959742	4.2006	2.66207e-05	0.0010821
RPL5P17	19.471	-0.491288	-0.535377	0.117028	-4.19805	2.69226e-05	0.00109042
SNORD3C	54.8803	-0.795486	-1.09463	0.189749	-4.19231	2.76126e-05	0.00111597
LINC00877	458.562	-0.498257	-0.544861	0.118967	-4.18822	2.81156e-05	0.00113385
PIM1	1187.82	0.778723	1.05397	0.186122	4.18395	2.86492e-05	0.0011529
PSMA6	299.181	0.240312	0.24488	0.0575045	4.17901	2.92778e-05	0.00117568
RPS23	1805.04	-0.280067	-0.287398	0.0670347	-4.17794	2.94157e-05	0.0011787
SELL	19039.1	0.509056	0.559748	0.121896	4.17615	2.96479e-05	0.00118547
HIST2H2AA4	454.447	0.48583	0.529151	0.116456	4.17178	3.0223e-05	0.00120591
HLA-A	6875.11	0.369764	0.387461	0.0887233	4.1676	3.07817e-05	0.00122559
RP11-296A18.5	153.227	-0.336429	-0.349521	0.0807428	-4.16667	3.09081e-05	0.00122802
DPRXP4	14.4298	0.874407	1.56342	0.210337	4.15717	3.22217e-05	0.00127752
CALM1	8033.34	0.268029	0.274509	0.0645299	4.15356	3.27341e-05	0.0012951
HES4	32.0055	0.881965	1.92046	0.212379	4.15279	3.28452e-05	0.00129676
RP11-15G8.1	21.2248	0.494204	0.540825	0.119128	4.14852	3.34635e-05	0.0013184
CCNY	717.047	-0.358174	-0.374331	0.0864173	-4.1447	3.4026e-05	0.00133776
TOR1A	1451.53	0.29606	0.304934	0.0714437	4.14396	3.41353e-05	0.00133926
PFKP	269.772	0.628719	0.740228	0.15179	4.14204	3.44234e-05	0.00134495
RP11-415J8.3	17.1292	0.819751	1.21088	0.197901	4.14223	3.4394e-05	0.00134495
APEX1	648.045	-0.384751	-0.405141	0.092975	-4.13822	3.50012e-05	0.00136469
RPL5P6	5.72608	-0.696779	-0.867102	0.168729	-4.12957	3.63445e-05	0.001413
SLC35A4	1071.18	0.348046	0.362933	0.0842875	4.12928	3.63908e-05	0.001413
MTHFD2	442.235	0.43423	0.464714	0.105177	4.12857	3.65021e-05	0.0014144
MTCO1P12	32949.2	-0.421605	-0.44923	0.102171	-4.12647	3.68369e-05	0.00142444
RPS3AP44	17.4459	-0.505115	-0.555815	0.122464	-4.12461	3.71364e-05	0.00143307
SRGAP2B	1278.74	0.369353	0.387443	0.0896511	4.1199	3.79042e-05	0.0014597
RP3-342P20.2	185.766	-0.314064	-0.3249	0.0763595	-4.11297	3.90602e-05	0.00150114
MTATP6P1	5990.51	-0.350621	-0.365989	0.0852839	-4.11123	3.93563e-05	0.00150944
2018-09-04	97.1249	0.84336	1.35311	0.205209	4.10975	3.96084e-05	0.00151601
RPS2P46	902.029	-0.308066	-0.3183	0.0750089	-4.10706	4.0072e-05	0.00153064
ARL2BP	75.1097	-0.31208	-0.322769	0.0760644	-4.10284	4.08113e-05	0.00155256
YTHDF3-AS1	17.6479	-0.788739	-1.10465	0.192236	-4.10296	4.0789e-05	0.00155256
RP11-671J11.5	102.271	0.293647	0.30252	0.0717707	4.09147	4.28655e-05	0.00162742
BAZ2A	659.424	0.368791	0.387096	0.0901894	4.08908	4.33088e-05	0.00164093
MBOAT2	136.316	-0.657721	-0.795003	0.16093	-4.08701	4.36966e-05	0.00165229
PRKAG2	669.23	0.343982	0.358679	0.0842435	4.08319	4.44217e-05	0.00167634
MTCO3P12	6034.55	-0.460747	-0.498776	0.112884	-4.0816	4.4727e-05	0.00168329
RPL21	3591.8	-0.276938	-0.284376	0.0678554	-4.0813	4.47851e-05	0.00168329
ATP6V0E1	5478.19	0.17439	0.176196	0.0428132	4.07328	4.6355e-05	0.00173882
FKBP15	1428.4	0.291875	0.300689	0.071695	4.07106	4.67997e-05	0.0017416
RORA	5.91446	0.835327	2.53558	0.205173	4.07132	4.6747e-05	0.0017416
RP11-113C12.2	69.6984	-0.277091	-0.284566	0.0680579	-4.07141	4.67304e-05	0.0017416
TCP11L2	145.361	-0.598696	-0.694995	0.147014	-4.07238	4.6536e-05	0.0017416
ATP5F1	3277.9	-0.202233	-0.205074	0.0496842	-4.07037	4.69376e-05	0.00174328
AL162151.3	78.9981	-0.323643	-0.335837	0.0795472	-4.06857	4.73035e-05	0.0017534
RIN2	1289.12	0.466173	0.506237	0.114684	4.06484	4.80657e-05	0.00177781
RPL3P9	32.8062	-0.379649	-0.400011	0.0934079	-4.06442	4.81512e-05	0.00177781
PRR13P5	591.403	0.176575	0.178463	0.0434797	4.0611	4.88411e-05	0.00179975
OPTN	136.044	0.830365	1.31992	0.204572	4.05904	4.92741e-05	0.00180987
RP11-489M13.1	14.8568	-0.517658	-0.575113	0.127537	-4.05888	4.93086e-05	0.00180987
STAT3	3070.41	0.253415	0.259137	0.0624592	4.05729	4.96445e-05	0.00181865
JUP	1395.91	0.758864	1.03315	0.187124	4.0554	5.00489e-05	0.0018299
LINC01503	99.8394	-0.530602	-0.593365	0.130855	-4.05489	5.01573e-05	0.0018303
RPL22	696.988	-0.27135	-0.278436	0.066954	-4.05278	5.06115e-05	0.0018433
CORO2A	182.938	0.730157	0.95706	0.180271	4.05032	5.11473e-05	0.00185921
NUPR1	55.7053	0.323765	0.336145	0.0800043	4.04685	5.19119e-05	0.00188336
GTPBP1	246.566	0.525959	0.58745	0.129987	4.04625	5.20442e-05	0.00188452
P4HA1	934.352	-0.353733	-0.370123	0.0874815	-4.04351	5.26561e-05	0.00190301
DNAJB9	554.444	-0.522447	-0.582422	0.129305	-4.04042	5.33557e-05	0.00192091
TRIM69	79.9981	0.599729	0.699419	0.148417	4.04084	5.32608e-05	0.00192091
NT5C3A	972.108	0.416617	0.444597	0.103182	4.03769	5.39801e-05	0.00193967
MIR142	127.545	0.576397	0.662759	0.14293	4.03272	5.51341e-05	0.00197736
RP11-124B13.1	8.6922	0.768247	1.07225	0.190696	4.02865	5.60976e-05	0.00200547
SMTNL1	13.1797	0.84383	1.46979	0.209465	4.02851	5.61314e-05	0.00200547
ATRN	1456.6	-0.430977	-0.462409	0.107052	-4.02586	5.67677e-05	0.00202436
RASGEF1B	946.08	0.610492	0.7186	0.15173	4.02354	5.73291e-05	0.0020405
CD38	218.725	0.70291	0.898011	0.174837	4.02038	5.81047e-05	0.0020642
P2RY6	48.7735	0.853374	1.72973	0.212514	4.01561	5.92928e-05	0.00210243
CYSTM1	553.322	0.400219	0.425124	0.099773	4.0113	6.03866e-05	0.00213615
TCTN1	110.562	-0.613995	-0.724661	0.153086	-4.01078	6.05197e-05	0.00213615
TTC19	663.123	-0.393004	-0.416433	0.0979932	-4.01052	6.05847e-05	0.00213615
HMGB1P5	1002.7	-0.155887	-0.157216	0.0389214	-4.00517	6.19733e-05	0.00218102
ADAP2	955.11	0.359364	0.377027	0.0897983	4.0019	6.28352e-05	0.00220483
NHSL1	71.5059	0.655221	0.801203	0.163742	4.00154	6.29313e-05	0.00220483
RP11-87N24.3	13.9661	0.672962	0.837332	0.168187	4.00128	6.30018e-05	0.00220483
AC009950.2	207.318	0.558357	0.636955	0.139641	3.99852	6.37408e-05	0.00222655
CTSL3P	4.94289	0.804191	1.22991	0.201271	3.99556	6.4541e-05	0.00225031
MT-TS1	966.43	-0.41217	-0.439803	0.103198	-3.99397	6.49762e-05	0.00226129
LINC01492	16.2329	0.45603	0.4948	0.1142	3.99324	6.5176e-05	0.00226405
CD1C	255.765	-0.695173	-0.882634	0.174134	-3.99218	6.54697e-05	0.00227006
CNIH1	1210.41	-0.294328	-0.303771	0.0737876	-3.98885	6.63938e-05	0.00229786
RPL4P5	287.388	-0.272632	-0.280079	0.0684041	-3.98562	6.73054e-05	0.00232513
RP3-391O22.3	6.66228	0.798423	1.20994	0.20049	3.98237	6.82323e-05	0.00235283
SERPINA1	27153.6	0.227946	0.232244	0.0572903	3.97879	6.92681e-05	0.00238417
CMTM2	63.6992	-0.731081	-0.972642	0.183964	-3.97404	7.06629e-05	0.00242666
RP11-465N4.2	41.7796	-0.381104	-0.402733	0.0959062	-3.97371	7.0761e-05	0.00242666
PABPC1	9049.68	-0.280992	-0.289236	0.0707498	-3.97163	7.13819e-05	0.0024435
PARP11	358.942	0.593471	0.694369	0.149582	3.96752	7.26231e-05	0.00247905
TXN	1623.92	0.265288	0.272201	0.0668681	3.96732	7.26843e-05	0.00247905
PUS7	43.6729	-0.843021	-1.65791	0.212526	-3.96667	7.28835e-05	0.00248134
SLC39A4	88.3487	-0.603747	-0.710983	0.152304	-3.96409	7.36767e-05	0.00250381
PP7080	72.7103	-0.723986	-0.957159	0.182723	-3.9622	7.4261e-05	0.00251911
H2AFJ	367.266	0.366221	0.385414	0.0924398	3.96172	7.44116e-05	0.00251967
GHRL	49.6731	-0.738603	-0.997486	0.186585	-3.95853	7.54129e-05	0.00254441
RP1-40G4P.1	115.575	-0.284923	-0.293588	0.0719719	-3.95882	7.53225e-05	0.00254441
COPS3	932.004	-0.345534	-0.36149	0.0873385	-3.95626	7.61327e-05	0.0025595
DUX4L50	111.533	0.653405	0.802941	0.165157	3.95627	7.61306e-05	0.0025595
NCMAP	32.3156	0.392025	0.41605	0.0991665	3.9532	7.71131e-05	0.00258783
CTD-2647E9.3	29.2567	0.719326	0.952984	0.182287	3.94613	7.94244e-05	0.00265591
RPL10A	1029.34	-0.251394	-0.257306	0.0637005	-3.9465	7.93028e-05	0.00265591
BLZF1	356.424	0.586548	0.684584	0.148685	3.94491	7.98283e-05	0.00266468
CD163	3303.79	0.553965	0.633418	0.140624	3.93934	8.17075e-05	0.00272257
PRMT2	1989.5	-0.293326	-0.302928	0.0744888	-3.93785	8.22148e-05	0.00272979
RPL15P18	97.1252	-0.315128	-0.327152	0.0800223	-3.938	8.2164e-05	0.00272979
XRN1	903.366	0.396761	0.422009	0.100774	3.93712	8.24659e-05	0.0027333
IFIT6P	6.21074	0.820694	2.20998	0.208516	3.93587	8.28952e-05	0.00274269
EIF3D	1904.35	-0.23597	-0.240861	0.0599655	-3.93509	8.31657e-05	0.00274681
RUFY4	89.2593	0.788972	1.19428	0.200547	3.9341	8.35095e-05	0.00275332
RPL7P6	48.5525	-0.355622	-0.373409	0.0904996	-3.92954	8.51073e-05	0.00280109
FAM72A	51.5696	0.590221	0.692183	0.150316	3.92653	8.61819e-05	0.0028315
MT-CO1	96338.6	-0.397033	-0.422482	0.101185	-3.92385	8.71468e-05	0.0028582
RP11-421N8.1	364.806	-0.254531	-0.260772	0.0649761	-3.9173	8.95448e-05	0.00293173
KLHL33	64.8817	0.28203	0.290641	0.0720757	3.91297	9.1169e-05	0.00297868
RP11-413B19.2	12.7944	0.497697	0.552757	0.127203	3.91263	9.12958e-05	0.00297868
ORAI2	877.491	-0.353327	-0.370976	0.0905129	-3.9036	9.47706e-05	0.0030867
RP11-364L4.1	253.249	-0.323273	-0.336562	0.0828242	-3.90312	9.49596e-05	0.0030875
CRIP3	31.1127	-0.804161	-1.28846	0.206056	-3.90263	9.51533e-05	0.00308846
SNORD3B-2	57.8072	-0.741842	-1.02492	0.190379	-3.89667	9.75244e-05	0.00315996
MYL8P	155.308	0.225923	0.230291	0.0579915	3.89579	9.78806e-05	0.00316118
RPS2P55	313.936	-0.29394	-0.303826	0.0754516	-3.89574	9.78985e-05	0.00316118
RPS3	4099.28	-0.252665	-0.258838	0.0648708	-3.89489	9.82419e-05	0.0031614
RPS8	1440.36	-0.251642	-0.257737	0.0646045	-3.89511	9.8153e-05	0.0031614
LINC01554	15.0586	0.682735	0.874228	0.175363	3.89327	9.89033e-05	0.00317725
FGD5-AS1	1214.05	-0.280959	-0.289559	0.0721737	-3.89282	9.90873e-05	0.00317773
SLC25A6	2718.15	-0.302704	-0.313579	0.0777957	-3.89101	9.9827e-05	0.003196
SRPK2	664.706	-0.320842	-0.333916	0.0824695	-3.89043	0.000100067	0.00319824
S100A6	11484	0.219806	0.223834	0.056507	3.88989	0.000100291	0.00319996
C4orf32	844.026	0.234031	0.238921	0.0601786	3.88894	0.000100681	0.00320695
GNG5P2	186.28	0.237128	0.242234	0.0610336	3.8852	0.000102247	0.0032513
GBP3	349.102	0.673617	0.855862	0.173616	3.87992	0.000104492	0.0033171
TGM2	67.684	0.820206	1.55697	0.211899	3.87075	0.000108503	0.00343861
PRKAG2-AS1	137.738	-0.557949	-0.643195	0.144243	-3.86812	0.000109676	0.00346994
AC092620.3	7.14213	-0.818295	-1.78055	0.211941	-3.86095	0.000112945	0.00356735
MT-CO3	32230.8	-0.433515	-0.46888	0.112321	-3.8596	0.000113574	0.0035812
APOL1	141.863	0.592929	0.702134	0.153807	3.85502	0.000115722	0.00364283
IKBKE	966.518	0.379298	0.402167	0.0984098	3.85427	0.000116076	0.00364515
SNORD3A	66.6107	-0.723471	-0.983251	0.187737	-3.85363	0.000116378	0.00364515
ZNF784	55.0351	0.675103	0.864043	0.175186	3.85364	0.000116377	0.00364515
AC067945.3	5.99683	0.816369	1.55669	0.211918	3.85229	0.00011702	0.00365916
RPL7P15	53.9494	-0.292437	-0.302422	0.0759386	-3.85097	0.00011765	0.00367276
AB019441.29	68.7956	-0.30401	-0.315325	0.079103	-3.84322	0.000121432	0.00378452
RBM3	2787.59	-0.342061	-0.358532	0.0890236	-3.84237	0.000121853	0.00379138
ATF5	171.138	0.444933	0.484106	0.115875	3.83976	0.000123153	0.00381915
MVP	2913.3	0.262364	0.269518	0.0683246	3.83996	0.000123054	0.00381915
PDE7A	201.265	0.586044	0.691841	0.152756	3.83646	0.00012482	0.00386448
FGD2	3155.76	0.299355	0.310197	0.0780608	3.83489	0.000125619	0.00388282
RP11-379K17.4	8.71664	-0.763969	-1.13483	0.199416	-3.83103	0.000127608	0.00393783
RP11-325P15.2	17.43	0.521497	0.590352	0.136208	3.82869	0.000128826	0.00396891
ERGIC2	624.281	0.32332	0.337211	0.0844656	3.82783	0.00012928	0.00397078
MGAT1	5391.5	0.192624	0.195402	0.0503229	3.82777	0.00012931	0.00397078
C7orf49	303.5	-0.316563	-0.329555	0.0827456	-3.82574	0.000130378	0.00399706
WDR74	225.168	-0.43224	-0.46808	0.113123	-3.82098	0.00013292	0.00406835
EIF3E	1281.71	-0.256297	-0.263021	0.0670989	-3.81969	0.000133619	0.00407647
RPS2P7	272.608	-0.301486	-0.312654	0.0789281	-3.81975	0.000133585	0.00407647
RP11-778D9.4	174.861	-0.266998	-0.274643	0.0699567	-3.81661	0.000135298	0.00412098
PPP1R18	2197	0.18223	0.184602	0.0478691	3.80684	0.000140753	0.00427578
RP11-707G18.1	59.4035	-0.680585	-0.882102	0.178786	-3.8067	0.000140835	0.00427578
NUCB1	2355.16	0.239613	0.245116	0.0629706	3.80515	0.000141718	0.00429565
CHD1	1478.93	0.279896	0.288839	0.0736214	3.80182	0.000143634	0.00434673
ST13	949.683	-0.292611	-0.302891	0.0769898	-3.80064	0.000144322	0.00436052
DNASE2	1040.96	0.433665	0.470504	0.114128	3.79983	0.000144798	0.00436789
ARL6IP5	6186.18	-0.216904	-0.220966	0.0571043	-3.79838	0.000145643	0.00438633
CDK11A	12.0897	0.561856	0.655104	0.148155	3.79235	0.000149226	0.00448703
MALAT1	112695	0.213628	0.217526	0.0563917	3.78828	0.000151694	0.00454492
RP11-546B8.5	55.3934	-0.359495	-0.379441	0.09491	-3.78774	0.000152021	0.00454492
RPA1	557.404	-0.420856	-0.454332	0.111115	-3.78759	0.000152118	0.00454492
SPTLC2	2403.71	0.337107	0.353344	0.0889833	3.78843	0.000151603	0.00454492
LINC01470	18.1319	0.460442	0.506167	0.121713	3.78301	0.000154945	0.00462204
RPS27A	2377.69	-0.238658	-0.24416	0.0630998	-3.78223	0.000155431	0.0046292
ANAPC15	329.016	-0.25143	-0.257904	0.0664952	-3.78118	0.000156086	0.00464133
AC016708.2	178.307	-0.32614	-0.340819	0.0863441	-3.77721	0.000158592	0.00470841
KDM1A	474.064	-0.405758	-0.435615	0.107463	-3.7758	0.000159497	0.0047278
REC8	70.3999	0.686195	0.907709	0.182084	3.76857	0.000164184	0.00485907
LGALS1	3672.61	0.332786	0.348557	0.0883291	3.76757	0.000164845	0.00487096
RPS2P5	868.746	-0.340295	-0.357229	0.0903649	-3.76578	0.000166027	0.00489818
CASP7	438.481	0.484711	0.540034	0.128777	3.76395	0.000167253	0.00491778
CTD-3014M21.1	654.444	-0.758652	-1.14823	0.201558	-3.76395	0.000167252	0.00491778
IL31RA	30.7921	0.773645	1.24741	0.205559	3.76361	0.000167476	0.00491778
PATL1	898.589	0.360754	0.381333	0.0960102	3.75746	0.000171649	0.00502872
RAB1A	1488.93	0.30839	0.320839	0.0820785	3.75725	0.000171789	0.00502872
IL27	41.4485	0.695387	0.935717	0.185203	3.75473	0.000173527	0.00507168
BAZ1A	1238.91	0.289231	0.299435	0.0771114	3.75082	0.000176254	0.00514338
ERVK3-1	42.0003	-0.651382	-0.826051	0.173829	-3.74725	0.000178784	0.00520912
C17orf107	9.70412	-0.790203	-1.81419	0.210951	-3.7459	0.000179747	0.00522099
TMEM60	314.209	0.501394	0.564518	0.133841	3.74618	0.000179545	0.00522099
RP4-758J18.13	121.169	0.336071	0.35257	0.0897405	3.74492	0.00018045	0.00523332
PRKDC	745.62	-0.392546	-0.419923	0.104994	-3.73875	0.000184938	0.00535522
TMEM255A	45.3084	0.758716	2.3919	0.203024	3.73707	0.000186176	0.00538278
GMIP	2431.76	0.232066	0.23725	0.0621401	3.73457	0.00018804	0.00542831
GLUL	11291.9	0.331997	0.347978	0.0889575	3.73208	0.000189904	0.00546534
TRIB2	17.8748	0.736207	2.72492	0.197247	3.73241	0.00018966	0.00546534
SH3KBP1	2129.9	-0.153103	-0.154556	0.0410336	-3.73115	0.000190606	0.00547716
RP11-665C16.9	93.2748	0.29064	0.301146	0.0779438	3.72885	0.000192357	0.00551904
SPG21	4176.31	-0.201755	-0.205138	0.0541384	-3.72666	0.000194032	0.00555861
SC5D	182.676	0.586323	0.702531	0.15766	3.7189	0.000200093	0.00572352
RP11-810P12.7	384.632	-0.586653	-0.702438	0.157936	-3.7145	0.000203606	0.00580632
ZNF185	738.338	-0.491106	-0.550732	0.132199	-3.71488	0.000203297	0.00580632
WBP2	1560.2	0.237008	0.242608	0.0638263	3.71333	0.000204553	0.00582448
RP11-51O6.1	349.628	-0.248216	-0.254688	0.066912	-3.70959	0.000207595	0.00590216
ATXN7	243.712	0.373121	0.396782	0.10061	3.7086	0.000208404	0.00591623
ACP6	42.6691	-0.637755	-0.803315	0.172163	-3.70438	0.000211912	0.00600672
RP11-206M11.7	4.9043	0.681842	0.91483	0.184207	3.7015	0.000214326	0.00606601
PABPC1P4	113.782	-0.277287	-0.286485	0.0749534	-3.69946	0.000216063	0.00610597
ZBTB8OS	442.223	0.248605	0.255152	0.0672079	3.69904	0.00021642	0.00610687
FADD	88.7059	0.517843	0.591285	0.140061	3.69727	0.00021793	0.00614026
IGF2R	500.272	0.410357	0.443089	0.111119	3.69294	0.000221674	0.00622708
UBL4A	645.364	-0.369641	-0.392757	0.100086	-3.69324	0.000221419	0.00622708
FYB	7710.95	0.267235	0.275473	0.072395	3.69134	0.000223073	0.00625545
HBG2	5.79461	0.730884	1.0798	0.198053	3.69034	0.000223952	0.00625545
LINC01447	34.3869	0.345463	0.36412	0.0936146	3.69027	0.000224015	0.00625545
RP11-563H6.1	36.7014	-0.360811	-0.382217	0.0977614	-3.69073	0.000223611	0.00625545
RP11-492M23.2	246.018	-0.288351	-0.29881	0.0781629	-3.68911	0.000225044	0.00627486
MSMO1	187.18	0.658068	0.854564	0.17843	3.68811	0.00022593	0.00629022
MFSD13A	313.913	0.431514	0.47046	0.117059	3.68628	0.00022756	0.00632438
PGAP1	47.305	0.774594	1.37032	0.21016	3.68573	0.000228048	0.00632438
ZNF233	9.57235	-0.756365	-1.19813	0.205222	-3.6856	0.000228166	0.00632438
EEF1A1P10	54.768	-0.411822	-0.445046	0.111776	-3.68436	0.00022928	0.0063459
SRGAP2D	62.9563	0.437245	0.47813	0.118759	3.68179	0.0002316	0.00640068
C2orf47	115.063	0.558586	0.657516	0.151759	3.68075	0.00023255	0.00640506
MB21D1	292.604	0.449225	0.494086	0.122056	3.6805	0.000232781	0.00640506
SUMF1	1408.48	-0.300569	-0.312559	0.0816606	-3.68071	0.000232582	0.00640506
NPM1P12	4.86066	-0.686934	-0.931462	0.186737	-3.67861	0.000234513	0.00644327
RPS18P12	48.8983	-0.285315	-0.295498	0.0775836	-3.67751	0.000235518	0.00645814
TMEM205	1211.39	-0.198517	-0.201825	0.0539848	-3.67727	0.000235741	0.00645814
OSMR	9.70217	0.522847	0.600404	0.142255	3.67541	0.000237468	0.00648135
SRSF8	577.094	-0.368175	-0.391243	0.100167	-3.67563	0.000237263	0.00648135
U2	757.787	-0.687109	-0.929495	0.186956	-3.67524	0.000237623	0.00648135
SNORD3B-1	52.916	-0.681124	-0.913211	0.185378	-3.67425	0.000238549	0.00649717
LARP1	628.658	0.329333	0.345473	0.0896851	3.6721	0.000240565	0.00654261
RP11-613M5.2	91.0058	-0.277233	-0.28656	0.0755077	-3.67158	0.000241055	0.00654645
RP11-69L16.5	183.804	-0.268718	-0.277197	0.0732326	-3.66938	0.000243141	0.00659357
ADGRE3	337.262	-0.695529	-0.956511	0.189659	-3.66727	0.000245157	0.00663866
CTB-129P6.7	46.6424	0.309638	0.322941	0.0844876	3.66489	0.000247448	0.00668974
RPL7P13	9.76719	-0.474699	-0.529538	0.129537	-3.66457	0.000247755	0.00668974
RP11-570G20.1	51.5477	-0.32224	-0.337338	0.0879502	-3.66389	0.000248415	0.00669794
OTUD7B	19.8455	0.381112	0.407191	0.104098	3.6611	0.000251135	0.00676159
CES1P2	76.74	0.721875	1.05869	0.197326	3.65829	0.000253904	0.00682636
SH3BP2	2867.26	0.196704	0.199968	0.0538695	3.65148	0.00026073	0.00699986
PABPC3	335.351	-0.265242	-0.273489	0.0727117	-3.64786	0.000264437	0.00708925
MAP3K12	17.9272	-0.774264	-1.54764	0.212551	-3.64272	0.000269776	0.00722207
AC008984.2	27.7585	0.599599	0.73647	0.164848	3.63729	0.000275527	0.00736554
UNC93B7	96.0087	0.330049	0.34667	0.0907842	3.63553	0.000277414	0.00740545
C17orf89	174.875	-0.419322	-0.45587	0.11551	-3.63017	0.000283239	0.00753954
RPS17	813.814	-0.270203	-0.279033	0.0744272	-3.63043	0.000282944	0.00753954
AC005251.3	216.305	-0.268055	-0.276676	0.0738701	-3.62874	0.000284813	0.0075707
NDUFB9	1605.42	0.269929	0.278757	0.0744286	3.62669	0.00028708	0.00762019
RP11-151F5.2	53.2919	-0.33087	-0.347694	0.0912648	-3.62538	0.000288535	0.00764802
RXRA	349.643	0.3413	0.359955	0.0941779	3.62399	0.000290092	0.00767845
MAF1	1977.48	-0.178989	-0.181478	0.049443	-3.62011	0.00029448	0.0077727
RPL6	1616.96	-0.223611	-0.228541	0.0617639	-3.62042	0.000294129	0.0077727
RP11-343H5.4	251.665	-0.237178	-0.243096	0.0655293	-3.61942	0.000295262	0.00778242
STAC3	99.2844	0.49622	0.562915	0.137247	3.61553	0.000299729	0.00788908
BTN3A3	433.237	0.505089	0.576319	0.139757	3.61406	0.000301439	0.00792299
TRANK1	152.956	0.649557	0.849182	0.179807	3.61253	0.000303228	0.0079589
RP5-882O7.1	43.8074	-0.342939	-0.361995	0.095021	-3.60908	0.000307281	0.00805402
TNIK	22.3954	0.763357	1.75341	0.211669	3.60636	0.00031052	0.00811816
UNC93B4	55.3865	0.335568	0.353436	0.0930505	3.6063	0.000310592	0.00811816
HLA-H	1973.62	0.339004	0.357463	0.0940422	3.60481	0.000312381	0.00815357
CCT6A	1526.32	-0.224634	-0.229683	0.0623358	-3.60361	0.000313822	0.00817983
SH3GLB1	1887.55	0.229959	0.235391	0.0638198	3.60325	0.000314257	0.00817983
FOLR2	476.791	-0.430182	-0.470827	0.119461	-3.60102	0.000316968	0.00823897
NR1H2	1809.71	0.223061	0.228015	0.0619646	3.59982	0.000318435	0.00826335
TIMP1	3022.77	0.359211	0.381566	0.0997937	3.59954	0.000318785	0.00826335
RPL36AP45	68.5258	0.239989	0.24621	0.0667011	3.59798	0.0003207	0.00830153
WDFY1	1321.74	0.408924	0.443396	0.113762	3.59454	0.000324963	0.00840033
CFL1P2	57.7469	0.282207	0.292574	0.0785768	3.59148	0.000328801	0.00848786
MT-TL1	22.2437	0.430723	0.472068	0.120011	3.58904	0.000331894	0.00855594
RP1-240K6.3	110.066	-0.482263	-0.543607	0.134557	-3.58409	0.000338259	0.00870808
LYPLA1	1916.6	-0.29477	-0.306714	0.0822538	-3.58366	0.00033881	0.00871034
RPL5P29	25.7735	-0.415319	-0.451801	0.11591	-3.58312	0.000339508	0.00871636
SETDB2	252.977	-0.462409	-0.515289	0.129073	-3.58254	0.00034027	0.008724
AP000253.1	22.6213	0.44491	0.491407	0.124299	3.57936	0.000344433	0.0088097
GIMAP4	3522	0.446375	0.493392	0.124723	3.57892	0.000345019	0.0088097
NUP133	269.296	-0.522425	-0.60479	0.145964	-3.57913	0.000344746	0.0088097
HLA-DOA	102.241	-0.758388	-1.41116	0.212015	-3.57705	0.000347491	0.00886079
CPVL	19860.9	-0.296462	-0.308684	0.0829154	-3.57547	0.000349594	0.00888028
MAP4K1	337.634	-0.414937	-0.451506	0.116053	-3.57541	0.000349673	0.00888028
RPS2P35	87.6027	-0.289708	-0.301059	0.0810159	-3.57595	0.000348962	0.00888028
RNU2-1	63.9737	-0.682819	-0.947562	0.191051	-3.57401	0.000351556	0.00890404
RPL6P27	385.153	-0.233536	-0.239329	0.0653384	-3.57426	0.000351226	0.00890404
S1PR2	129.639	0.547681	0.647666	0.153358	3.57127	0.000355255	0.00898561
RP11-503N18.5	10.9612	0.619736	0.788388	0.173562	3.5707	0.00035603	0.0089931
PEA15	2736.87	-0.360021	-0.382939	0.100877	-3.56892	0.000358451	0.00904211
MYO1G	2825.94	0.296974	0.30934	0.0832592	3.56686	0.000361287	0.00908925
RP11-804F13.2	22.7275	-0.40458	-0.438439	0.113422	-3.56703	0.000361046	0.00908925
AHNAK	8195.51	-0.265623	-0.274332	0.0745449	-3.56326	0.000366275	0.0092024
HSP90B1	4056.44	-0.236945	-0.243046	0.0665078	-3.56266	0.000367118	0.00921127
COA3	805.906	0.290751	0.302352	0.0816432	3.56124	0.000369101	0.00924869
CTD-2547L16.1	12.8097	-0.594179	-0.732968	0.166884	-3.56042	0.000370256	0.00926528
FAM168B	414.888	-0.379067	-0.406398	0.106513	-3.55888	0.000372438	0.00930747
FXYD5	2972.68	0.229511	0.235066	0.0645653	3.55472	0.000378386	0.00943117
PYCARD	1871.86	0.166535	0.168608	0.0468489	3.55471	0.000378391	0.00943117
HLA-B	23267.9	0.369544	0.394805	0.103986	3.55378	0.000379739	0.00945224
COQ4	274.844	-0.367362	-0.392087	0.103386	-3.5533	0.000380425	0.00945292
FAAH	418.639	-0.451764	-0.501503	0.12716	-3.55272	0.000381276	0.00945292
TMEM63A	354.868	0.489205	0.555537	0.137698	3.55274	0.000381242	0.00945292
ADAMTSL4	788.162	0.316439	0.331719	0.0890814	3.55224	0.000381964	0.00945751
OSGEP	475.284	-0.35209	-0.373658	0.0991907	-3.54963	0.000385775	0.00953931
C8orf37	23.5275	-0.682615	-0.957939	0.19252	-3.54568	0.0003916	0.00965793
CES1	1795.48	0.703182	1.03994	0.198305	3.54596	0.000391181	0.00965793
PTPRO	145.342	0.733338	1.20543	0.206875	3.54484	0.000392858	0.00967625
BCL7B	1074.36	0.325752	0.34263	0.0919623	3.54224	0.000396745	0.00975921
CTB-131B5.2	76.2153	0.448609	0.497741	0.126685	3.54114	0.000398395	0.00977421
NUDT3	870.796	-0.276583	-0.286606	0.0781012	-3.54135	0.00039809	0.00977421
DUSP7	181.518	0.447548	0.496382	0.126491	3.53818	0.000402902	0.00987188
SERPINB6	1975.58	-0.234627	-0.240633	0.066321	-3.53775	0.000403547	0.00987482
RP11-771F20.1	72.3781	-0.251576	-0.259046	0.0711509	-3.53581	0.000406527	0.0099348
ACSL3	675.929	0.380259	0.408382	0.107596	3.53415	0.000409093	0.00998371
RPS3AP41	6.84473	-0.574654	-0.698797	0.162615	-3.53383	0.000409591	0.00998371
NARS	2933.36	-0.258168	-0.26628	0.0730726	-3.53304	0.000410818	0.0100006
CTD-2006C1.2	88.5642	-0.347454	-0.368375	0.0983937	-3.53126	0.000413578	0.0100548
HERPUD1	4113.01	-0.266906	-0.275948	0.0756912	-3.52625	0.000421496	0.0102209
RPL23A	1789.85	-0.222606	-0.227742	0.0631243	-3.52647	0.000421133	0.0102209
C9orf116	5.32886	-0.683615	-2.41467	0.194107	-3.52185	0.000428541	0.0103734
KDM6B	188.257	0.440882	0.487755	0.125192	3.52164	0.00042889	0.0103734
HLA-F	1659.32	0.24339	0.250193	0.0691338	3.52056	0.000430632	0.0103957
RP11-110J1.2	107.229	0.256953	0.265016	0.0729899	3.52039	0.000430919	0.0103957
RP11-367G18.2	73.7138	-0.285548	-0.296783	0.081158	-3.51842	0.000434128	0.0104597
SPHK1	393.168	0.477844	0.540516	0.135956	3.51469	0.000440265	0.010594
PCBP1-AS1	347.757	-0.350016	-0.371666	0.0995987	-3.51427	0.000440971	0.0105974
RAB12	196.345	0.409162	0.445782	0.116629	3.50823	0.000451101	0.0108132
RP11-160E2.6	18.3106	-0.681489	-0.967656	0.19425	-3.50831	0.000450962	0.0108132
MCRIP2	260.565	-0.329654	-0.347564	0.094022	-3.50614	0.000454654	0.0108845
RPL7P47	53.4555	-0.275197	-0.285275	0.0785247	-3.50459	0.000457313	0.0109342
RAB3D	2473.75	-0.250792	-0.258335	0.0715798	-3.50367	0.000458886	0.010949
SH3GL3	8.93295	0.552156	0.661761	0.157599	3.50355	0.000459097	0.010949
RPL28	802.466	0.275875	0.286075	0.0788152	3.50028	0.000464773	0.0110703
CSTB	2421.69	0.226517	0.23203	0.0647419	3.49876	0.00046742	0.0111193
RPL13	3449.57	-0.239946	-0.246541	0.0686012	-3.4977	0.000469287	0.0111418
S100A10	10752.1	0.249541	0.256999	0.0713473	3.49755	0.000469552	0.0111418
RP11-407P2.1	50.2991	-0.313567	-0.328884	0.0896813	-3.49646	0.000471475	0.0111733
FNDC3B	790.887	0.326167	0.343644	0.0933632	3.49352	0.000476689	0.0112826
U1	75.9994	-0.630836	-0.825405	0.180725	-3.49059	0.000481954	0.0113929
CATIP	34.714	-0.603013	-0.761851	0.172862	-3.48841	0.000485904	0.0114719
CNDP2	2079.82	0.301511	0.315164	0.0865201	3.48487	0.000492375	0.01161
BTN3A1	599.513	0.447627	0.498569	0.128649	3.47944	0.000502464	0.0118331
RP11-193E15.4	44.2056	-0.305463	-0.319752	0.0878296	-3.4779	0.000505357	0.0118863
NFE2	2776.81	0.439727	0.487746	0.126549	3.47477	0.000511298	0.012011
GRIPAP1	653.436	0.274553	0.284765	0.0790243	3.47429	0.000512211	0.0120174
RP11-681B3.4	28.1137	0.496031	0.570414	0.142888	3.47146	0.000517642	0.0121297
HLA-K	152.285	0.315726	0.331735	0.0911009	3.46567	0.000528906	0.0123699
MYL12BP2	105.91	0.249756	0.257381	0.072069	3.46552	0.000529206	0.0123699
RP11-401P9.7	8.00837	0.734309	1.64949	0.211983	3.464	0.000532204	0.0124245
CYP27A1	2287.61	-0.4352	-0.481719	0.125649	-3.46361	0.000532986	0.0124273
INSIG1	766.922	0.573723	0.706247	0.165664	3.46318	0.000533839	0.0124318
TMEM159	198.731	-0.395454	-0.429059	0.114283	-3.4603	0.000539566	0.0125496
CTD-2240E14.4	8.25004	0.71581	1.18404	0.207161	3.45533	0.000549618	0.0127676
LEPROTL1	1633.18	0.308123	0.32304	0.0891932	3.45456	0.000551201	0.0127885
ADPRHL2	505.687	0.441524	0.491012	0.127874	3.4528	0.00055479	0.0128555
PEBP1	635.737	-0.308698	-0.323708	0.0894219	-3.45215	0.000556138	0.0128555
RPL7P8	22.0067	-0.331703	-0.350627	0.0960785	-3.45241	0.000555598	0.0128555
MIR1199	7.06103	-0.733333	-1.48676	0.212536	-3.45039	0.00055977	0.0129235
RPS27AP1	57.9307	-0.304837	-0.319276	0.0883704	-3.44954	0.000561553	0.0129488
SBNO1	1026.03	-0.285646	-0.297395	0.0828258	-3.44875	0.000563183	0.0129705
FCER1G	16725.3	0.188595	0.19183	0.0547361	3.44553	0.000569944	0.0130956
LFNG	106.112	0.543993	0.652228	0.157885	3.4455	0.000570011	0.0130956
SFXN3	954.753	0.275674	0.286213	0.0800398	3.44421	0.000572733	0.0131421
AC009245.3	124.1	-0.236102	-0.242591	0.0686046	-3.44149	0.000578519	0.0132587
RP11-468E2.4	115.947	0.552105	0.667498	0.160466	3.44064	0.00058034	0.0132842
TICAM1	432.235	0.358033	0.382565	0.10409	3.43965	0.000582457	0.0133164
TUFM	2243.92	-0.210424	-0.214975	0.0611948	-3.4386	0.000584736	0.0133523
RP11-52B19.1	11.2782	-0.439031	-0.487942	0.127693	-3.43817	0.000585664	0.0133573
RP11-673C5.1	328.581	-0.136745	-0.137967	0.0398316	-3.43307	0.000596786	0.0135944
PTPN11	766.039	-0.310602	-0.32612	0.0905162	-3.43145	0.000600359	0.0136593
FAM228B	49.5784	-0.440001	-0.489549	0.128276	-3.4301	0.00060335	0.0137107
RP11-680A11.5	19.0263	0.602185	0.771859	0.175612	3.42907	0.000605642	0.0137296
SHFM1	980.196	0.227666	0.233508	0.0663872	3.42937	0.000604987	0.0137296
RPS23P8	360.268	-0.248941	-0.256663	0.0726354	-3.42727	0.000609675	0.0137947
SCCPDH	736.372	0.48181	0.550837	0.140587	3.42714	0.000609981	0.0137947
MIR548XHG	19.6152	0.410138	0.449202	0.119696	3.4265	0.000611417	0.0138105
RHOH	13.673	0.707249	1.15495	0.206432	3.42606	0.000612414	0.0138164
ARL8A	651.397	0.268834	0.27869	0.0784894	3.4251	0.00061457	0.0138485
RP11-326C3.11	19.9081	0.697408	1.09623	0.203797	3.42208	0.000621451	0.0139867
TBC1D14	510.85	-0.349221	-0.372066	0.102082	-3.421	0.000623919	0.0140255
HLA-DMB	3867.49	-0.318426	-0.335356	0.0931003	-3.42024	0.000625652	0.0140476
RPL21P134	101.946	-0.25764	-0.266266	0.0753374	-3.41981	0.000626641	0.0140531
TOMM6	1312.58	-0.165674	-0.167888	0.0485073	-3.41543	0.000636804	0.014264
AC079325.6	225.726	0.643181	0.882531	0.188476	3.41254	0.000643608	0.0143992
DAPK3	235.412	0.331862	0.351376	0.0973286	3.40971	0.000650314	0.0145319
MT1F	110.328	0.550789	0.668422	0.161588	3.40861	0.000652957	0.0145737
RRBP1	474.794	0.315306	0.331914	0.0926499	3.4032	0.00066602	0.0148476
TTC38	368.614	0.373452	0.402378	0.10975	3.40275	0.000667114	0.0148544
RP11-44F14.1	248.239	-0.326222	-0.344742	0.095886	-3.40218	0.000668507	0.0148677
RGS2	12273	-0.54308	-0.653888	0.15968	-3.40105	0.000671275	0.0149117
CTB-79E8.3	50.085	-0.265021	-0.274587	0.0779399	-3.40032	0.000673073	0.0149339
LYPLA1P3	60.607	-0.307207	-0.322515	0.0903897	-3.39869	0.000677093	0.0150054
RP11-638I2.10	92.8222	0.326222	0.34487	0.0960687	3.39572	0.000684491	0.0151515
ZNF425	5.58063	-0.700062	-1.86576	0.206241	-3.39439	0.000687826	0.0152074
SNX20	1625.18	0.309964	0.325786	0.0913534	3.39302	0.000691261	0.0152654
RPL21P119	240.326	-0.237947	-0.244809	0.0701943	-3.38984	0.000699332	0.0154255
ARL3	228.026	-0.428209	-0.47465	0.126385	-3.38814	0.000703676	0.0154875
EMP3	10156.8	0.218831	0.224132	0.0645924	3.38788	0.000704361	0.0154875
SPATA13	354.655	0.371054	0.399662	0.109527	3.38778	0.000704612	0.0154875
TKT	8294.54	-0.197849	-0.201734	0.0584264	-3.38629	0.000708437	0.0155364
ZDHHC7	2668.46	-0.267439	-0.277365	0.0789775	-3.38627	0.000708491	0.0155364
AIM1	877.144	0.304813	0.319879	0.0900354	3.38548	0.000710543	0.0155632
ADI1	2107.31	-0.21893	-0.224249	0.0646995	-3.38379	0.000714925	0.0156124
CES1P1	496.723	0.676271	1.01523	0.199883	3.38334	0.00071611	0.0156124
FLNB	120.754	0.717885	1.38169	0.212163	3.38365	0.000715299	0.0156124
LGALS3	9626.67	-0.178149	-0.180969	0.0526471	-3.38384	0.000714799	0.0156124
LAMTOR3	992.265	0.311816	0.328058	0.0921922	3.38224	0.000718973	0.0156566
ADAMTS5	41.1385	-0.689428	-1.93692	0.203959	-3.38023	0.000724248	0.0157532
GPD2	532.662	0.436137	0.486235	0.129135	3.37737	0.00073182	0.0158995
TNK2	200.124	0.392951	0.427973	0.116451	3.37437	0.000739835	0.0160551
CCDC28A	581.381	0.294592	0.308226	0.0873829	3.37128	0.000748201	0.0162133
MT-ATP8	1577.51	-0.302108	-0.31687	0.0896185	-3.37104	0.000748849	0.0162133
NOA1	309.149	-0.380669	-0.412155	0.112971	-3.36961	0.000752741	0.0162788
RP11-43N16.4	28.1295	0.58509	0.743758	0.17369	3.36859	0.000755538	0.0163205
AC005154.6	240.157	0.357906	0.383633	0.106284	3.36745	0.00075867	0.0163612
CERS2	1025.46	-0.214681	-0.21974	0.0637553	-3.36727	0.000759165	0.0163612
SCIN	38.0314	0.474139	0.54262	0.140918	3.36465	0.000766398	0.0164982
RPS2P4	110.074	-0.293536	-0.307053	0.0872547	-3.36413	0.00076785	0.0165105
KIAA1161	23.2908	0.416408	0.459476	0.123829	3.36278	0.000771622	0.0165727
RP11-440L14.1	41.3423	-0.451258	-0.508333	0.134336	-3.35917	0.000781764	0.0167713
CYBRD1	763.699	-0.496865	-0.578203	0.147953	-3.35827	0.000784308	0.0168067
FAM101B	777.16	-0.465154	-0.52893	0.138549	-3.35731	0.000787038	0.0168276
TPT1P9	102.222	-0.25779	-0.266805	0.0767848	-3.3573	0.000787071	0.0168276
CAPG	9542.2	0.248886	0.256961	0.0741566	3.35622	0.000790162	0.0168744
TMEM175	660.27	0.243692	0.251263	0.0726587	3.35393	0.000796724	0.0169953
GPR84	104.556	0.67996	1.05394	0.202789	3.35304	0.000799297	0.0170308
GGTA1P	369.962	-0.616096	-0.819141	0.183836	-3.35133	0.000804238	0.0171167
APOBR	280.145	0.35688	0.382693	0.106565	3.34894	0.000811203	0.0172454
RNVU1-4	8.20852	-0.700843	-1.19291	0.209321	-3.34817	0.000813479	0.0172743
AGPAT3	637.742	0.362662	0.389945	0.108389	3.34591	0.000820116	0.0173411
ALDH1A1	1222.88	-0.439422	-0.491901	0.131334	-3.34585	0.000820319	0.0173411
HIGD1AP1	44.8447	0.282846	0.295018	0.0845206	3.34648	0.000818446	0.0173411
NPC2	5365.07	0.177101	0.179936	0.052929	3.34602	0.000819818	0.0173411
TIMM13	532.932	-0.276056	-0.287321	0.0825239	-3.34517	0.000822327	0.017364
2018-09-06	594.337	0.259386	0.268654	0.0775657	3.34408	0.000825573	0.017413
FAM204A	1044.45	-0.233784	-0.240474	0.0699184	-3.34367	0.000826791	0.0174192
RANBP9	133.764	0.428279	0.476539	0.128141	3.34224	0.000831039	0.0174754
RP11-398H6.1	122.973	0.280014	0.29184	0.0837825	3.34215	0.000831319	0.0174754
SMAD3	458.088	0.458187	0.519663	0.137158	3.34059	0.000836007	0.0175543
PSMA3	1363.28	0.23181	0.238358	0.0694759	3.33654	0.000848268	0.0177918
GDE1	883.93	-0.268467	-0.278854	0.0805246	-3.33398	0.000856123	0.0179366
RPL21P75	234.607	-0.238153	-0.245288	0.0714706	-3.33218	0.00086169	0.0180331
SUMF2	502.153	-0.296033	-0.310288	0.0890249	-3.32529	0.00088328	0.0184644
PEMT	233.753	-0.381582	-0.414332	0.11477	-3.32475	0.000884979	0.0184793
GLS	321.655	0.404792	0.445001	0.121794	3.32358	0.000888699	0.0185364
COA1	383.815	0.328518	0.348544	0.0989011	3.32168	0.000894782	0.0186426
ANKFY1	475.798	0.485525	0.563286	0.146476	3.31471	0.000917377	0.019029
RHOB	560.395	-0.553213	-0.682731	0.166882	-3.31499	0.000916459	0.019029
SNHG8	156.278	-0.437403	-0.490251	0.131928	-3.31546	0.000914917	0.019029
TUSC2	582.206	-0.212589	-0.21766	0.0641313	-3.3149	0.000916763	0.019029
YTHDC1	356.155	0.245539	0.253505	0.0741479	3.31148	0.000928054	0.0192292
BLNK	36.0282	0.684952	1.8918	0.206891	3.3107	0.000930635	0.0192434
LILRB2	6349.64	0.214657	0.2199	0.0648443	3.31035	0.000931809	0.0192434
OR2A1-AS1	20.0041	0.371707	0.402043	0.112278	3.3106	0.00093096	0.0192434
BUD31	702.528	0.207708	0.212443	0.06276	3.30956	0.000934442	0.0192766
AC022210.2	96.0612	-0.301034	-0.316234	0.0909812	-3.30875	0.000937145	0.0193111
ARID5A	583.297	0.249513	0.257909	0.0754197	3.30833	0.000938554	0.019319
DEF8	888.62	-0.267235	-0.277655	0.0808059	-3.30713	0.000942575	0.0193652
NHLRC3	476.14	0.316944	0.33495	0.0958391	3.30704	0.000942858	0.0193652
RPL21P28	172.147	-0.237518	-0.244731	0.0719477	-3.30125	0.000962547	0.019748
DSTN	677.672	-0.29473	-0.30902	0.0892938	-3.30067	0.000964531	0.0197671
DOCK8	3182.28	0.233345	0.240188	0.0707164	3.29972	0.000967803	0.0198126
GAPDHP46	5.0301	0.654567	0.97119	0.198391	3.29938	0.000968979	0.019815
RPH3A	268.85	-0.654172	-0.960557	0.198409	-3.29708	0.00097695	0.0199563
IRF2	1259.46	0.328221	0.348565	0.0996243	3.29459	0.000985654	0.0201123
CECR2	8.65187	-0.637117	-0.90062	0.193455	-3.29336	0.00098996	0.0201767
RPL15P20	43.4352	-0.312813	-0.330204	0.0949999	-3.29278	0.000992035	0.0201767
UBE2L5P	25.5378	0.359667	0.387282	0.109228	3.2928	0.000991952	0.0201767
RPL5P24	17.9494	-0.351012	-0.376458	0.106612	-3.29242	0.000993305	0.0201807
CFL1	9062.3	0.246785	0.254983	0.0749739	3.29162	0.000996136	0.0201946
DTD1	299.575	-0.376005	-0.407917	0.114223	-3.29186	0.000995287	0.0201946
GNB4	889.518	0.342259	0.365661	0.104002	3.2909	0.000998691	0.0202246
L3MBTL3	105.049	-0.548664	-0.677308	0.166905	-3.28728	0.0010116	0.020464
TBC1D9	650.995	-0.426873	-0.476552	0.130002	-3.28359	0.00102493	0.0207114
VHL	588.463	-0.320574	-0.339581	0.0977379	-3.27993	0.00103832	0.0209594
RPL31	4045.63	-0.19918	-0.203421	0.060742	-3.27912	0.00104131	0.0209972
PLEKHO2	1434.19	0.294537	0.309031	0.0898555	3.27789	0.00104585	0.0210436
UGDH-AS1	387.468	0.189289	0.192919	0.0577432	3.27812	0.00104501	0.0210436
RP11-560J1.2	8.37845	-0.678902	-1.76014	0.207223	-3.27619	0.00105219	0.0211485
CISH	242.302	0.532843	0.649329	0.162835	3.27229	0.00106679	0.0214191
RNU5F-1	25.3523	-0.606119	-0.812398	0.185303	-3.27096	0.00107185	0.0214975
RPL13P12	696.573	-0.238394	-0.245847	0.0729034	-3.26999	0.00107549	0.0215256
SAP18	2716.67	0.145524	0.147155	0.044503	3.26998	0.00107554	0.0215256
RP11-225N10.1	5.03991	-0.674491	-1.08757	0.206301	-3.26944	0.00107759	0.0215437
PABPC4	304.659	-0.433274	-0.486299	0.132594	-3.26767	0.00108437	0.0216222
POLR2J	800.546	-0.221774	-0.227734	0.0678719	-3.26754	0.00108488	0.0216222
TMEM229B	302.093	0.484096	0.564134	0.148154	3.26751	0.00108497	0.0216222
GPKOW	291.822	0.385594	0.421101	0.11804	3.26665	0.00108829	0.0216655
BLOC1S2	1340.16	0.211786	0.21696	0.0648499	3.26579	0.0010916	0.0216854
EXOC6	520.354	0.305364	0.321781	0.0934997	3.26593	0.00109105	0.0216854
FLVCR2	594.392	0.400286	0.440688	0.122588	3.2653	0.00109347	0.0216997
AC009961.2	5.40469	-0.555459	-0.695955	0.170282	-3.262	0.00110631	0.0219313
RP11-439A17.9	13.9267	0.656939	1.00421	0.201502	3.26021	0.00111331	0.0220469
TRIM58	90.6272	0.613027	0.838707	0.188059	3.25975	0.00111511	0.0220592
ST13P13	12.2236	-0.45329	-0.516192	0.139114	-3.25841	0.00112038	0.0221402
C4orf3	2557.49	0.170436	0.173102	0.0523475	3.25585	0.00113053	0.0223137
FLJ37453	106.534	-0.384164	-0.419418	0.118033	-3.25472	0.00113504	0.0223137
POM121	308.18	-0.304833	-0.321254	0.0936497	-3.25503	0.0011338	0.0223137
RP11-112J1.1	410.681	-0.214845	-0.220288	0.0660105	-3.25471	0.0011351	0.0223137
STX11	4304.25	0.285597	0.298932	0.0877386	3.25509	0.00113358	0.0223137
RP11-50D9.1	235.719	-0.224701	-0.230966	0.0690867	-3.25244	0.00114418	0.0224688
CHEK2	77.0048	-0.604575	-0.814338	0.186173	-3.24738	0.00116474	0.0228249
RP11-333A23.4	5.003	0.685917	1.2576	0.211209	3.24757	0.00116394	0.0228249
SNRNP35	265.636	0.365134	0.395131	0.112521	3.24502	0.00117441	0.0229902
RP11-111M22.3	15.0769	-0.629847	-0.894426	0.194165	-3.24388	0.00117913	0.0230563
RP11-734J24.1	99.0209	-0.248105	-0.256694	0.0764904	-3.24361	0.00118024	0.0230563
CYB5A	239.917	0.421443	0.470653	0.129947	3.24319	0.00118198	0.0230664
HP09025	35.8953	0.330601	0.352241	0.102031	3.24021	0.0011944	0.0232605
UNC93B2	69.2235	0.318941	0.338175	0.0984253	3.24044	0.00119347	0.0232605
LA16c-60D12.1	188.422	0.184912	0.188376	0.0570761	3.23974	0.00119638	0.023275
IFI27L2	374.963	0.27643	0.288583	0.0853635	3.23827	0.00120255	0.0233219
LIMS3	151.329	0.288979	0.302988	0.0892254	3.23875	0.00120055	0.0233219
PSMC2	1182.12	0.254027	0.263327	0.0784521	3.23799	0.00120376	0.0233219
RP3-337H4.6	138.443	-0.300378	-0.316207	0.0927534	-3.23846	0.00120179	0.0233219
APOPT1	243.223	-0.240337	-0.24815	0.0742358	-3.23748	0.00120592	0.0233396
IL12RB1	185.079	0.451703	0.515217	0.139606	3.23555	0.00121407	0.0234733
RBM34	474.547	0.302804	0.319112	0.093595	3.23525	0.00121534	0.0234737
RPL7A	1664.05	-0.229758	-0.23656	0.0710503	-3.23373	0.00122184	0.023575
CH17-373J23.1	67.9936	-0.626198	-0.885312	0.193692	-3.23296	0.00122515	0.0236098
PFN1P1	1207.68	0.135437	0.136779	0.0418955	3.23272	0.00122616	0.0236098
HIST2H2AC	93.4374	0.398192	0.43893	0.123255	3.23064	0.00123515	0.0237585
TTC3	1267.47	-0.28134	-0.294257	0.0871094	-3.22972	0.00123909	0.0238101
PTGER2	1754.65	0.40554	0.449007	0.125611	3.22855	0.00124419	0.0238837
MTCO3P11	25.9515	0.680987	1.23491	0.211007	3.22731	0.00124958	0.0239382
RPL26	462.913	-0.20685	-0.211777	0.0640897	-3.22751	0.00124872	0.0239382
CMTM3	2930.59	-0.26653	-0.277432	0.0826119	-3.22629	0.00125406	0.0239995
AFMID	231.217	-0.330985	-0.352894	0.102608	-3.22573	0.00125653	0.0240224
PLEC	1126.35	0.250819	0.259853	0.0778601	3.22141	0.00127563	0.0243627
ENOPH1	452.001	-0.275597	-0.287779	0.0856031	-3.21947	0.00128429	0.0245031
WDR12	198.583	-0.413007	-0.459525	0.128317	-3.21864	0.00128802	0.0245495
RP11-274B21.3	21.0955	0.514092	0.620012	0.159769	3.21772	0.00129213	0.0245778
ZNF682	9.8358	0.672739	1.15577	0.209062	3.21789	0.00129137	0.0245778
PSMA5	1049.38	0.261274	0.271586	0.0812334	3.21633	0.00129841	0.0246723
ABCB7	366.235	-0.361208	-0.390699	0.112354	-3.2149	0.00130489	0.0247704
FAM206A	754.054	-0.335297	-0.358371	0.104375	-3.21243	0.00131619	0.024959
RPL7AP66	78.8631	-0.226561	-0.233165	0.0705346	-3.21206	0.00131787	0.024959
ST6GAL2	18.6669	0.450329	0.514656	0.140208	3.21186	0.00131881	0.024959
LINC00528	139.353	-0.592069	-0.790136	0.18452	-3.20871	0.00133334	0.0252087
TPCN1	1036.52	-0.299743	-0.315857	0.0935646	-3.20359	0.00135723	0.0256347
CECR5	1077.21	-0.239173	-0.247044	0.0746774	-3.20275	0.00136124	0.0256735
STX4	461.693	0.31188	0.330239	0.097384	3.20258	0.00136202	0.0256735
KIF22	237.311	-0.476346	-0.555769	0.148911	-3.19887	0.00137966	0.025954
MTURN	101.031	-0.528188	-0.647707	0.165108	-3.19904	0.00137886	0.025954
SMU1	1813.64	0.195759	0.199998	0.0612262	3.19731	0.00138718	0.0260693
KB-1683C8.1	101.376	-0.2518	-0.261108	0.0788389	-3.19385	0.00140387	0.0263566
RP11-153M7.3	184.577	0.461911	0.533405	0.14467	3.19286	0.00140873	0.026395
RPL10AP2	78.2735	-0.250347	-0.259493	0.0784042	-3.19303	0.00140788	0.026395
DUX4L37	15.4673	0.536628	0.666619	0.168097	3.19238	0.00141105	0.0264122
A1BG	84.1328	-0.467744	-0.542401	0.14656	-3.19148	0.00141546	0.0264684
TLR2	4146.42	0.278426	0.291272	0.0872643	3.19061	0.00141973	0.0265219
MEFV	892.729	0.270337	0.282034	0.0847427	3.19009	0.00142229	0.0265433
ZNF252P-AS1	5.59418	-0.67397	-1.51252	0.211355	-3.1888	0.00142864	0.0266353
HLA-G	523.09	0.341251	0.366199	0.107051	3.18775	0.00143382	0.0266897
IFNGR2	6695.13	0.224059	0.230547	0.0702901	3.18764	0.0014344	0.0266897
RP5-828K20.1	16.6072	-0.471699	-0.549305	0.148042	-3.18626	0.00144127	0.0267912
POLR2E	2318.71	-0.16781	-0.170471	0.0526925	-3.18471	0.00144897	0.0269076
CANX	4282.67	-0.213936	-0.219565	0.0671942	-3.18384	0.00145334	0.0269622
ANGEL2	380.821	0.307896	0.325776	0.0967815	3.18135	0.00146588	0.027168
RP11-35G9.3	73.8578	0.493444	0.586761	0.155268	3.17801	0.00148287	0.0274558
EPDR1	17.4898	0.659495	1.77899	0.207569	3.17723	0.00148687	0.0274802
NPM1	1438.5	-0.22137	-0.227658	0.0696748	-3.17719	0.00148712	0.0274802
PFN1	16316.5	0.121025	0.122013	0.038105	3.17609	0.00149274	0.0275569
GNG2	1122.03	-0.390718	-0.430387	0.123037	-3.17562	0.00149517	0.0275748
MYC	202.348	0.542483	0.681648	0.171045	3.17157	0.00151615	0.0279343
JPH4	72.945	0.670187	1.23124	0.211363	3.1708	0.00152022	0.0279819
TLR1	1100.2	0.312243	0.33111	0.0985121	3.16959	0.00152654	0.0280708
AC009302.2	54.0091	0.239404	0.24749	0.0755843	3.16738	0.00153819	0.0282573
XXbac-BPG154L12.4	263.597	0.172395	0.175322	0.0544523	3.16598	0.0015456	0.0283657
ZNF274	174.454	-0.493349	-0.587057	0.155851	-3.16552	0.00154806	0.0283831
LIMS1	1034.13	0.247396	0.256421	0.0783204	3.15877	0.00158437	0.0290111
ZNF366	57.608	0.651944	1.06168	0.206404	3.15858	0.0015854	0.0290111
SLC39A8	248.739	0.654824	1.08608	0.207474	3.15617	0.00159858	0.0292239
RPL7AP30	69.6512	-0.282993	-0.296868	0.0897456	-3.15328	0.00161448	0.0294857
NDUFAF1	230.708	0.426688	0.482052	0.135426	3.1507	0.0016288	0.0296896
RNASE6	2164.6	0.247865	0.256992	0.0786645	3.15091	0.0016276	0.0296896
RP11-392P7.1	67.7907	-0.232584	-0.240053	0.0738498	-3.14942	0.00163596	0.0297912
PRKAR2A	533.588	-0.282857	-0.296761	0.0898515	-3.14805	0.00164362	0.0298729
RP11-203F10.6	164.741	-0.215923	-0.221851	0.0685875	-3.14814	0.00164314	0.0298729
MTFMT	211.524	-0.324758	-0.346526	0.103178	-3.14756	0.0016464	0.0298945
ARHGEF3	1014.19	0.388246	0.428077	0.123408	3.14603	0.00165501	0.0299488
ISCA1	317.001	-0.385597	-0.424376	0.122557	-3.14626	0.00165374	0.0299488
LEKR1	19.9964	-0.668362	-1.28874	0.212427	-3.14632	0.00165339	0.0299488
PSMG3	253.785	-0.258216	-0.268626	0.0820865	-3.14566	0.00165713	0.0299488
ZYX	9715.8	0.202847	0.207744	0.0644857	3.14562	0.00165736	0.0299488
FERMT3	4421.95	0.175762	0.178911	0.0558929	3.14462	0.001663	0.0300219
MRPS22	524.78	0.260775	0.271565	0.0830177	3.14119	0.00168262	0.0303469
PDE4DIP	295.663	-0.403677	-0.449417	0.128615	-3.13866	0.00169724	0.0305812
CTSA	3870.33	0.309549	0.328311	0.0986434	3.13806	0.00170072	0.0306145
GRAMD1B	77.8428	0.585874	0.795259	0.18678	3.13671	0.00170856	0.0306969
RP11-16L9.1	7.3958	-0.477932	-0.563025	0.15236	-3.13687	0.00170764	0.0306969
HLA-J	242.098	0.364809	0.397268	0.11638	3.13464	0.00172068	0.0308851
HSPB1	49.6284	0.533401	0.668222	0.170253	3.133	0.0017303	0.0310282
GADL1	12.0543	0.413981	0.464497	0.132186	3.13182	0.00173727	0.0311219
STAP1	26.2215	0.517947	4.25415	0.165411	3.13127	0.0017405	0.0311219
WARS	10216.8	0.313696	0.333385	0.100175	3.13147	0.00173934	0.0311219
SP1	384.309	0.372024	0.406843	0.118862	3.12988	0.00174876	0.0312399
MRPL55	693.102	-0.2166	-0.222668	0.0692244	-3.12895	0.00175431	0.0313093
PHF1	128.785	0.466445	0.544947	0.149093	3.12856	0.00175666	0.0313216
WTIP	49.154	0.22965	0.236958	0.0735057	3.12425	0.00178259	0.0317538
RPL34P18	158.267	-0.197469	-0.202048	0.063282	-3.12046	0.0018057	0.0321349
SYT17	22.385	-0.523223	-0.647736	0.167717	-3.11967	0.00181053	0.0321905
PSMA6P2	71.0319	0.233395	0.241129	0.0748441	3.11841	0.00181827	0.032267
ZNF703	112.209	-0.507989	-0.618141	0.162888	-3.11865	0.00181683	0.032267
RP11-498C9.15	30.6385	-0.486862	-0.580027	0.15617	-3.11751	0.00182388	0.0323359
TPT1P4	70.0322	-0.259325	-0.270106	0.0831917	-3.1172	0.00182577	0.032339
TPST2	1400.33	0.315932	0.336311	0.101388	3.11606	0.00183287	0.0324342
APOBEC3D	70.2	0.426604	0.483643	0.136929	3.1155	0.00183631	0.0324358
TOP1	387.215	0.327125	0.349986	0.105	3.11549	0.00183641	0.0324358
RABGAP1L-IT1	69.0742	0.215373	0.221407	0.06914	3.11502	0.0018393	0.0324563
CTD-2013N17.1	56.4813	-0.273595	-0.286372	0.087857	-3.11409	0.00184514	0.0325288
RPL5P8	12.3788	-0.471464	-0.553989	0.151457	-3.11285	0.00185289	0.0326347
CBWD7	462.278	0.273489	0.286301	0.0878685	3.11247	0.00185526	0.032646
CCNG1	605.913	-0.361706	-0.393733	0.116261	-3.11114	0.00186364	0.0327321
RP11-632K20.7	95.355	-0.359717	-0.391195	0.115621	-3.11118	0.0018634	0.0327321
RP11-92K2.2	149.752	-0.24299	-0.251794	0.0781244	-3.1103	0.00186896	0.032795
LMNB1	321.259	0.496159	0.598071	0.159598	3.1088	0.00187851	0.0329318
DCTN6	301.021	0.355909	0.386377	0.114508	3.10814	0.00188266	0.032943
RTN1	1018.05	-0.516515	-0.635808	0.166173	-3.1083	0.00188165	0.032943
TMEM106A	225.209	0.333041	0.357436	0.107171	3.10758	0.00188624	0.032975
CREG1	5556.79	0.260911	0.271979	0.0839731	3.10708	0.00188945	0.0330004
RP11-254F19.3	13.8692	0.39354	0.43671	0.126714	3.10573	0.00189808	0.0331204
DUSP6	6360.9	0.428903	0.487713	0.138306	3.10112	0.00192791	0.0336096
RP11-10J5.1	19.7824	0.649619	1.628	0.209624	3.09897	0.00194193	0.0338227
RP11-386I14.4	255.724	-0.515332	-0.634941	0.166429	-3.09641	0.00195877	0.0340844
RP11-1H15.1	42.5732	0.414531	0.466831	0.133889	3.09608	0.00196098	0.0340912
RP11-1017G21.5	31.8449	-0.576358	-0.777024	0.186282	-3.094	0.00197479	0.0342996
PCED1A	201.65	-0.326088	-0.349052	0.105423	-3.09313	0.00198057	0.0343684
H1F0	910.071	0.510862	0.627717	0.165203	3.09233	0.00198589	0.0344289
TXNRD2	400.32	-0.340185	-0.366666	0.110071	-3.09059	0.00199761	0.0346001
RPL23AP35	6.61323	-0.482993	-0.575982	0.156381	-3.08857	0.00201123	0.0348039
ATPAF2	364.462	-0.300134	-0.317712	0.0972272	-3.08693	0.00202233	0.0349317
CATIP-AS1	37.2091	-0.511728	-0.629113	0.165761	-3.08714	0.0020209	0.0349317
CYBA	8318.66	0.197312	0.201995	0.0639631	3.08478	0.002037	0.0351527
EVL	210.849	0.439558	0.504848	0.142512	3.08436	0.00203992	0.0351708
NDUFA2	963.942	-0.133824	-0.135248	0.0433927	-3.08403	0.0020422	0.0351779
UBL3	839.112	-0.255316	-0.265823	0.0828464	-3.0818	0.00205756	0.03541
RNF31	210.021	0.356432	0.38768	0.115674	3.08136	0.00206058	0.0354296
CFLAR	2107.26	0.202981	0.208108	0.0658832	3.08093	0.00206356	0.0354484
NUAK2	958.621	-0.407719	-0.457411	0.132375	-3.08003	0.00206977	0.0355226
CCDC186	310.704	0.446231	0.515701	0.144977	3.07793	0.00208442	0.0357413
AC005795.1	316.956	0.188597	0.1927	0.0613638	3.07342	0.00211621	0.0359545
AC016577.1	7.76224	0.490861	0.5922	0.159652	3.07456	0.00210812	0.0359545
DENND1A	1948.72	0.199581	0.204472	0.0649511	3.07279	0.00212067	0.0359545
DPEP2	799.956	-0.333264	-0.358318	0.10845	-3.07297	0.00211938	0.0359545
FOXP1	1168.48	-0.223978	-0.23097	0.0728389	-3.07498	0.00210517	0.0359545
LINC00667	335.228	-0.416599	-0.47051	0.135502	-3.07449	0.00210861	0.0359545
LINC00976	78.7293	0.237599	0.246036	0.0772959	3.07389	0.00211286	0.0359545
RASA4	308.732	-0.512983	-0.633148	0.166914	-3.07334	0.00211679	0.0359545
RP11-81H14.2	34.3481	0.599785	0.862081	0.195049	3.07504	0.00210472	0.0359545
RPL14	1633.59	-0.174078	-0.177281	0.0566295	-3.07399	0.0021122	0.0359545
SMIM11A	78.1415	-0.363649	-0.397231	0.11835	-3.07264	0.00212172	0.0359545
STAT5B	838.192	-0.221453	-0.228205	0.072044	-3.07386	0.00211309	0.0359545
USP54	6.91974	-0.60499	-1.97974	0.196841	-3.0735	0.00211564	0.0359545
CARD17	11.8058	0.632863	1.76603	0.206343	3.06704	0.0021619	0.0364217
FTLP3	9891.35	0.145552	0.147413	0.0474588	3.06691	0.00216286	0.0364217
NUP188	320.686	-0.445166	-0.514281	0.145105	-3.06788	0.0021558	0.0364217
RNASE3	70.9966	0.613008	0.919122	0.199816	3.06786	0.00215597	0.0364217
RP11-549J18.1	24.1046	0.610014	0.906404	0.198856	3.06761	0.00215778	0.0364217
RPL18	2548.14	-0.179463	-0.182996	0.0585066	-3.06739	0.00215935	0.0364217
RPL9P9	738.489	-0.237895	-0.246388	0.0775656	-3.06702	0.00216207	0.0364217
HFE	155.651	-0.460897	-0.539767	0.150316	-3.06619	0.00216804	0.0364584
RP11-324J13.1	13.7682	-0.403893	-0.452507	0.13173	-3.06607	0.00216892	0.0364584
RPL36AP41	15.413	0.381668	0.421682	0.124495	3.06574	0.00217134	0.0364664
CCDC189	6.4221	-0.619258	-0.942388	0.202057	-3.06477	0.00217838	0.0365521
DNAJC10	2031.18	-0.244406	-0.253679	0.0797919	-3.06304	0.00219098	0.0367307
RPL3P1	24.6144	-0.316885	-0.338262	0.103518	-3.06115	0.00220485	0.0369303
NAAA	3208.11	-0.256472	-0.267302	0.0838291	-3.05947	0.00221732	0.037106
ZNF33B	188.873	-0.425195	-0.48402	0.139009	-3.05877	0.0022225	0.0371596
JAML	7328.63	-0.260658	-0.272078	0.0852627	-3.05712	0.00223475	0.0373312
AC005082.12	92.432	-0.646536	-1.17386	0.211541	-3.05632	0.00224074	0.0373882
RP11-244J10.1	17.5665	-0.349248	-0.378865	0.114278	-3.05613	0.00224214	0.0373882
PRRC2C	1296.54	0.173013	0.1762	0.0566408	3.05457	0.00225385	0.0374506
SLC6A4	17.4873	0.324681	0.348037	0.106284	3.05485	0.00225174	0.0374506
TNFRSF10A	324.307	0.362586	0.396421	0.118702	3.05459	0.00225367	0.0374506
TOB1-AS1	14.1152	-0.620746	-0.958141	0.203187	-3.05505	0.0022502	0.0374506
RP11-326C3.7	16.7895	0.629014	1.01898	0.206087	3.05218	0.00227186	0.0377165
EIF3G	1312.24	0.170539	0.173594	0.0558951	3.05105	0.00228039	0.0378247
ZBTB8A	91.5914	0.225105	0.232337	0.0738095	3.04981	0.00228984	0.037948
RP4-620F22.2	8.12072	0.641541	1.14626	0.210581	3.04653	0.00231497	0.0383305
AC007743.1	295.986	0.169901	0.172936	0.0557925	3.04522	0.00232507	0.0384639
TGFB1	2065.66	0.191485	0.195871	0.0628872	3.04491	0.00232754	0.0384709
HIST1H2AG	12.1253	0.646865	1.32372	0.212551	3.04334	0.00233972	0.0386043
TPM3P8	98.9294	0.205666	0.211143	0.0675752	3.04351	0.00233835	0.0386043
SRRT	708.046	0.252622	0.263083	0.0830505	3.04179	0.00235175	0.0387688
RALA	460.337	0.270044	0.283031	0.0889302	3.03658	0.00239278	0.0394107
RP11-8L8.2	77.4123	-0.388604	-0.432147	0.127999	-3.03599	0.00239744	0.0394529
WHAMMP3	80.4359	-0.313673	-0.334785	0.103329	-3.03568	0.0023999	0.0394588
TRAPPC6A	307.297	-0.315573	-0.337097	0.103976	-3.03507	0.00240483	0.0395053
TPM3	15693.6	0.168707	0.171695	0.0555915	3.03476	0.00240728	0.039511
FAM105A	3129.72	-0.215986	-0.222406	0.0711804	-3.03435	0.00241057	0.0395303
TP53INP1	648.885	-0.376069	-0.414978	0.123982	-3.03325	0.00241934	0.0396397
PKP2	52.5455	-0.630173	-1.03912	0.207843	-3.03196	0.00242969	0.0397745
CAT	4677.09	-0.177716	-0.181232	0.0586348	-3.03089	0.00243831	0.0398116
RPL36AP21	113.469	0.196436	0.201221	0.0648028	3.0313	0.00243506	0.0398116
TAPBP	7957.94	0.201247	0.206412	0.0663975	3.03093	0.00243799	0.0398116
AKAP7	131.77	0.498345	0.610703	0.164452	3.03035	0.00244273	0.0398492
PSMA4	2696.84	0.234157	0.242459	0.0772939	3.02943	0.00245016	0.0399151
RP11-205M3.3	9.23162	-0.425215	-0.48558	0.140366	-3.02932	0.00245102	0.0399151
TPGS2	574.197	-0.339443	-0.367019	0.112102	-3.02799	0.00246183	0.0400564
CYB5D2	145.099	-0.462064	-0.544904	0.152753	-3.02492	0.00248701	0.0402918
GDI1	983.258	0.168495	0.171492	0.0557001	3.02503	0.00248605	0.0402918
HGSNAT	800.512	-0.349199	-0.379595	0.115437	-3.02502	0.00248617	0.0402918
LARP7	507.75	0.278164	0.292567	0.0919437	3.02537	0.00248329	0.0402918
MAPKAPK5-AS1	376.178	-0.376654	-0.41602	0.124498	-3.02539	0.0024831	0.0402918
SRP68	703.174	-0.319566	-0.342197	0.105685	-3.02375	0.00249661	0.0404124
MYL12B	5778.43	0.161551	0.164188	0.0534383	3.02313	0.00250175	0.0404608
AC005301.9	65.143	-0.607249	-0.914125	0.200972	-3.02156	0.00251474	0.0406359
RP11-706C16.8	4.83933	0.534215	0.688881	0.176892	3.02	0.00252775	0.0408111
KMT2E-AS1	122.407	-0.376917	-0.416523	0.124825	-3.01956	0.00253144	0.0408355
C1GALT1	825.328	0.334986	0.361641	0.111027	3.01716	0.00255154	0.041054
ERI3	401.333	-0.237783	-0.246562	0.078802	-3.01747	0.00254896	0.041054
RPL23AP43	81.1594	-0.225515	-0.232947	0.0747386	-3.01738	0.00254969	0.041054
TRAPPC5	75.1402	0.218058	0.22476	0.072281	3.0168	0.00255457	0.0410676
ZC3H14	683.483	-0.237924	-0.246734	0.0788942	-3.01573	0.00256359	0.0411773
ABTB2	39.2869	0.617606	1.79173	0.20486	3.01476	0.00257179	0.0412035
CASP4	2679.78	0.193381	0.197996	0.0641348	3.01523	0.00256782	0.0412035
HEXDC	217.595	0.434384	0.500865	0.144081	3.01486	0.00257098	0.0412035
CBWD2	906.982	0.29126	0.308136	0.0966945	3.01217	0.00259391	0.0415225
ARNTL2	51.9776	0.526036	0.671237	0.174702	3.01104	0.00260351	0.0415699
CBWD5	798.797	0.256806	0.268075	0.0852833	3.01122	0.00260203	0.0415699
NR4A2	449.302	-0.571855	-0.787869	0.189901	-3.01133	0.00260102	0.0415699
DNPH1	323.371	-0.281752	-0.296905	0.0935954	-3.01032	0.00260976	0.0416343
HELLPAR	2480.45	0.154799	0.157134	0.0514294	3.00994	0.00261301	0.0416507
TXNL4B	156.508	0.436602	0.504734	0.14511	3.00877	0.00262306	0.0417756
H3F3C	2232.25	0.206497	0.212186	0.0686584	3.0076	0.00263323	0.041902
RBL2	1986.42	-0.236987	-0.245744	0.0788158	-3.00685	0.0026397	0.041934
STX17	244.662	0.347472	0.377885	0.115559	3.00688	0.00263947	0.041934
ENDOV	105.253	-0.444762	-0.517597	0.147953	-3.0061	0.0026462	0.0420018
MIR616	22.4869	-0.514815	-0.646555	0.171342	-3.00459	0.00265935	0.0421748
EIF3F	1066.43	-0.217674	-0.224395	0.0724636	-3.00391	0.00266534	0.0422342
EXT1	138.841	0.495087	0.607729	0.16493	3.00181	0.00268384	0.0424557
RPL14P1	368.361	-0.184452	-0.188473	0.0614433	-3.00199	0.00268225	0.0424557
AC083873.4	26.8673	-0.294135	-0.311674	0.0980101	-3.00107	0.00269036	0.0425231
RPL10AP6	100.96	-0.24289	-0.252402	0.0809667	-2.99987	0.00270096	0.042619
USP22	656.579	-0.247361	-0.257436	0.0824568	-2.99989	0.00270078	0.042619
PSMB10	1713.77	0.186508	0.190682	0.0621969	2.99867	0.00271158	0.0427506
QTRT1	128.712	-0.380968	-0.422845	0.12707	-2.99809	0.00271675	0.0427962
FAM225A	26.8133	0.61181	1.81045	0.204116	2.99736	0.00272325	0.0428627
ARHGAP17	1510.48	0.301518	0.320636	0.100627	2.99639	0.00273196	0.0429215
RIN1	308.469	0.432857	0.499579	0.144453	2.99652	0.00273076	0.0429215
RPS4XP17	20.0854	-0.41715	-0.475222	0.139227	-2.99618	0.00273384	0.0429215
RP11-16F15.2	73.6224	-0.235466	-0.244105	0.0785975	-2.99585	0.00273684	0.0429328
MFNG	2480.33	-0.195213	-0.20003	0.065173	-2.9953	0.00274172	0.0429734
ATP5H	1854.96	0.148954	0.151053	0.0497493	2.9941	0.00275258	0.0430162
CNFN	5.32107	-0.631095	-1.11938	0.210769	-2.99424	0.00275125	0.0430162
GREM1	15.8835	0.466837	0.556435	0.155926	2.99396	0.00275381	0.0430162
RP11-44M6.3	14.1212	0.368124	0.405516	0.122965	2.99373	0.00275589	0.0430162
SHF	13.1685	-0.544365	-0.716067	0.181828	-2.99384	0.00275488	0.0430162
B4GALT5	140.845	0.435885	0.504625	0.14563	2.9931	0.00276158	0.0430691
TCAF2	56.6688	0.379153	0.42066	0.126703	2.99245	0.00276751	0.0431259
RBM26-AS1	8.88527	-0.62266	-1.03096	0.208098	-2.99215	0.00277021	0.0431322
UQCRC2	1980.73	-0.185723	-0.189861	0.0620792	-2.99171	0.0027742	0.0431586
LSM4	916.94	-0.187689	-0.191968	0.0627612	-2.99052	0.002785	0.043255
TNF	243.296	0.505558	0.63019	0.169047	2.99064	0.00278393	0.043255
FOSL2	1041.85	-0.280588	-0.295773	0.093836	-2.9902	0.00278796	0.0432652
CD79B	113.084	0.493251	0.605623	0.164995	2.98948	0.00279449	0.0433307
AC006548.28	1467.82	0.158609	0.161161	0.0530683	2.98877	0.00280105	0.0433966
TMEM80	512.091	-0.315054	-0.337246	0.105439	-2.98803	0.00280779	0.0434653
NONO	2099.55	-0.16215	-0.164887	0.0543134	-2.98546	0.00283153	0.0437323
OAZ2	2011.76	-0.230523	-0.238674	0.0772167	-2.98541	0.00283202	0.0437323
RPL3P7	34.8992	-0.300542	-0.319619	0.100665	-2.98556	0.00283061	0.0437323
EZR	3302.01	0.28763	0.304171	0.0963734	2.98453	0.00284012	0.0438213
INPP4B	8.12816	0.550221	0.73744	0.184398	2.98388	0.00284619	0.043879
MAP2K6	284.629	0.477757	0.576898	0.160139	2.98339	0.00285072	0.0439128
LINC00487	14.9558	0.459553	6.04909	0.154191	2.98041	0.00287864	0.0443065
RHBDF2	1428.71	0.240701	0.250096	0.0808092	2.97864	0.00289533	0.0445269
AC016739.2	32.0819	-0.317478	-0.340434	0.106668	-2.97633	0.00291722	0.0447172
COX6A1P2	169.942	0.202291	0.207743	0.0679595	2.97664	0.00291426	0.0447172
HLA-C	19250.9	0.402504	0.454533	0.135233	2.97637	0.00291686	0.0447172
RP11-108M9.4	61.0899	-0.356014	-0.389757	0.119592	-2.97689	0.00291184	0.0447172
BAD	342.73	-0.293828	-0.311652	0.0987364	-2.97589	0.00292143	0.0447453
CRTAP	2873.83	-0.189612	-0.194075	0.0637245	-2.9755	0.00292509	0.0447648
SNX6	2091.55	0.179	0.182738	0.0601702	2.9749	0.00293087	0.0448168
SRP68P2	5.2938	-0.499661	-0.620083	0.168074	-2.97286	0.00295036	0.0450781
SCAPER	477.597	0.323116	0.347597	0.108719	2.97203	0.0029584	0.0451643
CD55	4299.77	0.338204	0.366734	0.113808	2.9717	0.00296156	0.0451759
HNRNPLL	531.86	0.278893	0.294023	0.0938975	2.97018	0.00297623	0.0452893
MYLK3	41.095	0.273953	0.288242	0.092223	2.97056	0.00297262	0.0452893
RP11-333E1.1	7.37331	-0.5878	-0.861502	0.197887	-2.97038	0.0029743	0.0452893
RNU4-2	21.3125	-0.586089	-0.853672	0.197427	-2.96864	0.00299119	0.0454801
RP11-34P13.13	90.914	0.380751	0.423747	0.128278	2.96818	0.0029957	0.0455119
FBXO7	1945.87	0.197209	0.202281	0.0664557	2.96753	0.00300205	0.0455393
PPDPF	336.825	0.352841	0.385896	0.118902	2.9675	0.00300235	0.0455393
UBE2F	507.124	0.270182	0.283877	0.0910608	2.96705	0.00300674	0.0455691
SWI5	69.7991	-0.507848	-0.637159	0.171196	-2.96647	0.00301245	0.0456188
LINC00355	38.1108	0.288325	0.305251	0.0972667	2.96427	0.00303399	0.045908
RARRES3	506.521	0.392317	0.440306	0.132376	2.96367	0.00303998	0.0459617
CA5BP1	291.61	0.27581	0.290517	0.0931481	2.96098	0.00306662	0.0463272
ATP6V1F	3645	0.122978	0.124175	0.041548	2.95989	0.0030775	0.0463802
CD300E	9850.84	0.240579	0.25009	0.081297	2.95926	0.00308381	0.0463802
CXCL11	25.9587	0.543713	2.58093	0.183711	2.95961	0.00308031	0.0463802
MT-CYB	43546.6	-0.284089	-0.300253	0.0959673	-2.96027	0.00307369	0.0463802
RPL21P3	25.184	-0.267494	-0.280806	0.0903745	-2.95984	0.00307799	0.0463802
RPL9P32	104.851	-0.249503	-0.260168	0.0843158	-2.95914	0.00308494	0.0463802
SRI	1716.81	0.213714	0.220285	0.0723056	2.95571	0.00311954	0.0468629
CNOT10	483.589	-0.297889	-0.31683	0.100812	-2.9549	0.00312773	0.0469484
INIP	709.155	-0.267073	-0.280376	0.0903931	-2.95457	0.00313108	0.0469486
RP11-796G6.1	56.1999	-0.242033	-0.251745	0.0819259	-2.95429	0.00313392	0.0469486
RPL9	2178.6	-0.17734	-0.181024	0.0600305	-2.95416	0.00313524	0.0469486
C9orf91	276.931	0.445904	0.523708	0.151012	2.95278	0.00314927	0.0470838
ZFP14	98.3377	-0.375003	-0.416123	0.126996	-2.95288	0.00314822	0.0470838
APLP2	14149	0.206508	0.21243	0.069973	2.95126	0.00316483	0.0472412
CCNI	3364.75	-0.196152	-0.201195	0.06646	-2.95142	0.00316312	0.0472412
PTK6	82.9821	0.3733	0.414069	0.126567	2.94941	0.00318379	0.0474499
RP11-254G11.1	28.0271	-0.303971	-0.324291	0.103062	-2.94941	0.00318386	0.0474499
GBP7	6.55724	0.6142	1.03453	0.208281	2.94891	0.003189	0.0474793
GMPS	542.752	-0.32504	-0.350427	0.110239	-2.9485	0.00319318	0.0474793
OGG1	303.481	-0.382897	-0.427359	0.129863	-2.94848	0.00319341	0.0474793
RPSAP9	33.0102	-0.302357	-0.322355	0.102604	-2.94685	0.00321033	0.0476931
STARD4	277.946	0.547062	0.737675	0.185683	2.94622	0.00321684	0.047752
HCG4P11	12.9327	0.413024	0.471833	0.140341	2.943	0.00325047	0.0482132
RP11-419L20.2	8.42368	0.566275	0.797938	0.192501	2.94167	0.00326444	0.0483823
LINC00441	4.96131	-0.604289	-1.63865	0.205451	-2.94128	0.00326855	0.048405
RPS3AP40	7.65132	-0.461731	-0.551379	0.157013	-2.94072	0.0032745	0.0484548
RP11-397E7.1	22.0469	-0.323624	-0.348813	0.110075	-2.94003	0.0032818	0.0485247
RPS18	3496.2	-0.173884	-0.17739	0.0591773	-2.93835	0.00329966	0.0487504
GRINA	4436.86	0.226791	0.234811	0.0771937	2.93795	0.00330389	0.0487732
RSL24D1	858.137	-0.210593	-0.216947	0.071686	-2.93772	0.0033064	0.0487732
PDCL3P3	7.22879	0.483723	0.593643	0.164706	2.9369	0.00331516	0.0488642
SP140L	316.912	0.272046	0.286386	0.0926829	2.93523	0.00333295	0.0490879
ROCK1	1745.56	0.188	0.19248	0.0640917	2.93329	0.00335387	0.0493573
SMIM10L1	435.557	-0.196189	-0.201302	0.0668895	-2.93303	0.00335672	0.0493606
CDK11B	161.94	0.291259	0.30919	0.09933	2.93223	0.00336534	0.0494117
MMP14	6.88716	-0.607216	-1.57273	0.207084	-2.93222	0.00336545	0.0494117
APOBEC3C	2142.23	0.186005	0.190345	0.0634506	2.93149	0.00337339	0.049451
MASTL	93.7586	0.525583	0.685042	0.179277	2.93168	0.00337131	0.049451
DHRS4-AS1	223.623	-0.388517	-0.436084	0.132599	-2.93001	0.00338954	0.049649
AC079922.3	25.2051	-0.615169	-1.06314	0.210022	-2.92907	0.00339979	0.0497603
ARAP2	774.533	0.360531	0.397327	0.123152	2.92753	0.00341671	0.0499302
MIR3945	12.0948	-0.604079	-0.972719	0.206339	-2.92761	0.0034158	0.0499302
CSNK1E	35.0275	-0.584961	-0.870902	0.199855	-2.92692	0.00342335	0.0499862
ZNF483	60.8821	0.220499	0.227902	0.0753408	2.92669	0.00342586	0.0499862
ABCA6	11.1869	-0.492837	-2.75352	0.168485	-2.92511	0.0034434	0.0501641
NR4A1	301.354	-0.611868	-1.03533	0.209171	-2.92521	0.00344229	0.0501641
ATRAID	2148.09	-0.13607	-0.137743	0.0465667	-2.92205	0.00347738	0.050448
MIR4435-2HG	258.074	0.349226	0.382354	0.11952	2.9219	0.00347899	0.050448
NLRC5	850.355	0.338994	0.368918	0.115997	2.92244	0.00347304	0.050448
PXMP4	174.782	-0.384551	-0.430694	0.131579	-2.92259	0.00347131	0.050448
SNRPA	528.025	0.191893	0.196705	0.0656634	2.92237	0.00347382	0.050448
TIRAP	56.2558	0.438019	0.512766	0.149889	2.92229	0.00347467	0.050448
L2HGDH	103.962	0.232017	0.240745	0.0794299	2.92103	0.00348872	0.0505218
RPL13A	2683.47	-0.209422	-0.215742	0.071696	-2.92097	0.00348945	0.0505218
RP4-592A1.2	141.111	0.161102	0.16391	0.0551703	2.92008	0.00349937	0.0506263
CD300A	2683.14	0.213955	0.220729	0.0733058	2.91867	0.00351533	0.0508181
CCR5	50.1217	0.616535	1.13083	0.211369	2.91687	0.00353566	0.0510727
RP11-760D2.5	15.5808	0.338008	0.367858	0.115995	2.91399	0.00356842	0.0515064
FOS	55417.5	-0.519508	-0.6723	0.178385	-2.91229	0.00358792	0.0517481
ROGDI	1177.86	-0.313273	-0.336391	0.107582	-2.91194	0.00359195	0.0517665
MT-TN	73.5753	-0.313166	-0.336304	0.107597	-2.91054	0.00360803	0.0519584
RPS4XP20	19.3207	-0.378664	-0.42295	0.13014	-2.90966	0.00361819	0.0520649
AL356585.1	26.2927	-0.358922	-0.395649	0.123389	-2.90885	0.00362759	0.0521601
IPO7	112.514	-0.471844	-0.573103	0.162266	-2.90785	0.00363928	0.0522483
NDUFB3	1088.41	0.221675	0.229305	0.0762294	2.90801	0.00363742	0.0522483
AP002381.2	36.1591	-0.328554	-0.355782	0.11306	-2.90601	0.00366069	0.0525156
NTNG2	61.755	0.512867	0.659925	0.17655	2.90494	0.00367329	0.052656
BAX	399.277	0.242468	0.252625	0.0834902	2.90415	0.00368253	0.0527483
RP11-96K19.4	32.163	0.482409	0.595097	0.166182	2.9029	0.00369728	0.0529192
FAM127B	267.2	0.246074	0.256738	0.0847946	2.902	0.00370787	0.0530304
PIK3AP1	4243.42	0.221521	0.229174	0.0763687	2.90067	0.00372364	0.053175
SNHG9	49.6271	-0.360147	-0.397522	0.124152	-2.90086	0.00372143	0.053175
KMT5A	114.104	0.414258	0.47628	0.142916	2.8986	0.00374827	0.0534861
AC093673.5	434.409	0.274607	0.289841	0.0948278	2.89585	0.00378134	0.0538353
MORF4L1	3602.55	-0.122344	-0.123577	0.042245	-2.89607	0.00377869	0.0538353
MTND1P23	1729.12	-0.307116	-0.32904	0.106048	-2.89601	0.0037794	0.0538353
WBP1L	988.972	-0.258023	-0.270489	0.0891509	-2.89423	0.00380088	0.0540727
TEX9	10.9721	0.40996	0.469824	0.141662	2.89394	0.00380444	0.0540823
BPI	156.885	0.592409	0.941986	0.204877	2.89153	0.0038337	0.0544073
BTBD2	99.8214	0.454062	0.542842	0.157036	2.89146	0.00383459	0.0544073
RP11-20D14.6	69.0994	0.437812	0.514827	0.151422	2.89134	0.00383598	0.0544073
WI2-1896O14.1	14.5179	-0.607754	-1.05618	0.21023	-2.8909	0.00384137	0.0544426
DUSP10	188.006	-0.44422	-0.525275	0.153722	-2.88976	0.00385532	0.0545873
F2R	20.3882	0.523907	0.689798	0.181308	2.88959	0.00385739	0.0545873
CDKL1	21.619	0.486051	0.603986	0.168237	2.88909	0.00386353	0.0546331
HDAC2	1014.51	-0.238935	-0.248736	0.0827178	-2.88856	0.00387014	0.0546854
RPS2P28	19.0085	-0.344477	-0.376909	0.119271	-2.88818	0.00387478	0.0547098
SFT2D1	1373.55	0.177023	0.180868	0.0613171	2.88701	0.00388924	0.0548728
RCSD1	3861.69	-0.197953	-0.203402	0.0686445	-2.88374	0.00392979	0.0554032
GCC2-AS1	6.40514	-0.612085	-1.27709	0.212353	-2.88239	0.00394671	0.0556001
RNU12	44.4042	-0.566685	-0.820734	0.196777	-2.87983	0.00397885	0.0560109
AC105052.1	19.954	-0.505054	-0.644884	0.175441	-2.87877	0.00399228	0.0561579
PRMT1	880.114	-0.193781	-0.198905	0.067357	-2.87693	0.00401563	0.0564441
FAM210B	704.381	-0.296738	-0.316619	0.103155	-2.87664	0.00401938	0.0564546
IRF1	4385.67	0.299711	0.320305	0.104231	2.87546	0.00403443	0.0566236
ATP5HP4	38.3501	0.281216	0.297964	0.0978242	2.87471	0.00404395	0.0567149
CD44	8790.35	-0.242191	-0.25254	0.0842885	-2.87336	0.00406129	0.0569156
SCARNA9	29.3598	-0.520123	-0.68179	0.181055	-2.87274	0.0040693	0.0569854
SLC27A3	1360.55	0.31294	0.336767	0.108956	2.87216	0.00407676	0.0570473
RP11-544I20.2	38.6953	0.221359	0.229163	0.0770912	2.87139	0.00408674	0.0571444
KBTBD3	78.5252	-0.473539	-0.58047	0.164957	-2.87068	0.00409592	0.0572302
MBNL1	3378.45	-0.179669	-0.183752	0.0626626	-2.86724	0.00414067	0.0578124
OSBPL5	297.403	0.312409	0.336221	0.108992	2.86634	0.00415252	0.0579348
CCL3L3	181.585	-0.607865	-1.29523	0.212101	-2.86593	0.00415793	0.0579673
RNF144A	36.7032	0.589865	0.952139	0.205877	2.86514	0.00416827	0.0580684
ATOX1	650.485	0.204936	0.211094	0.071534	2.86487	0.00417174	0.0580738
RNU4ATAC	17.3821	-0.568841	-0.837872	0.198704	-2.86275	0.00419984	0.0584217
RPL34	1686.3	-0.16465	-0.16778	0.0575196	-2.8625	0.00420308	0.0584234
EEF1A1P1	9.12372	-0.425872	-0.496972	0.14886	-2.8609	0.00422441	0.0586181
NLRP3	1827.41	0.244117	0.254841	0.0853311	2.86082	0.00422547	0.0586181
RP4-742C19.13	13.3721	-0.334144	-0.364126	0.116803	-2.86075	0.00422644	0.0586181
ABCE1	516.765	-0.394993	-0.448715	0.138111	-2.85996	0.00423692	0.0587201
FAM225B	20.796	0.579847	1.76695	0.202786	2.8594	0.00424441	0.0587745
RNF113A	332	-0.261473	-0.274837	0.0914497	-2.8592	0.0042471	0.0587745
CCDC28B	41.2137	-0.455653	-0.548163	0.159439	-2.85785	0.0042652	0.0589714
KLF2	324.951	0.51592	0.676572	0.180538	2.85767	0.0042676	0.0589714
MPO	239.286	0.437988	0.517802	0.153324	2.85662	0.00428172	0.059123
CCND3	6768.83	0.302682	0.324292	0.105977	2.85611	0.00428867	0.0591755
CCBE1	24.531	0.289281	0.30797	0.101359	2.85403	0.00431689	0.0595212
RP11-234A1.1	465.473	-0.18206	-0.186357	0.0638211	-2.85265	0.00433558	0.0597207
RP11-355B11.2	41.6012	-0.519085	-0.683649	0.181976	-2.8525	0.00433772	0.0597207
MED24	200.603	0.413206	0.477426	0.144909	2.85148	0.00435162	0.0598682
CRTAM	70.3675	0.5141	0.673583	0.180366	2.85031	0.00436764	0.0600008
RP11-17A4.2	83.551	0.207569	0.214057	0.0728211	2.8504	0.00436643	0.0600008
PFAS	64.8636	-0.542413	-0.749708	0.190399	-2.84882	0.00438823	0.0602396
RP11-366M4.1	29.0411	-0.294204	-0.313926	0.103285	-2.84846	0.00439319	0.0602636
MTATP6P11	18.22	0.602689	1.36258	0.211709	2.84678	0.00441644	0.0605383
ZNF383	135.669	-0.342349	-0.375274	0.120335	-2.84497	0.00444153	0.0608379
DGUOK	730.224	0.194621	0.19995	0.0684562	2.84301	0.00446902	0.06117
RPL21P129	12.88	-0.374322	-0.419332	0.131702	-2.84218	0.00448057	0.0612833
C11orf72	205.472	0.243426	0.254224	0.0857009	2.84042	0.00450543	0.0615786
TMEM256	61.1991	-0.282243	-0.299604	0.0994182	-2.83895	0.00452628	0.0618186
PGAM4	336.696	0.236169	0.246	0.083247	2.83697	0.00455438	0.0621571
GPR34	126.26	-0.593456	-1.00862	0.209369	-2.8345	0.00458981	0.0625953
ZNRF2	36.0985	0.464296	0.568006	0.163911	2.83261	0.00461697	0.0629201
MT1G	23.4703	0.490664	0.622262	0.173247	2.83217	0.0046233	0.0629607
DDX50P1	18.6663	-0.388357	-0.440388	0.137177	-2.83107	0.0046392	0.0631314
MICAL1	1123.41	0.252671	0.264936	0.0892989	2.8295	0.00466208	0.0633053
TFEC	820.015	0.307253	0.330461	0.108582	2.82968	0.00465951	0.0633053
TNNT1	208.509	0.578071	0.911647	0.204282	2.82977	0.00465821	0.0633053
KIAA1109	577.65	0.310271	0.334291	0.109731	2.82756	0.00469048	0.0635989
U47924.31	14.1939	-0.58642	-0.959567	0.20738	-2.82775	0.00468764	0.0635989
AC009892.10	36.553	0.37974	0.428097	0.134334	2.82683	0.00470109	0.0636969
SPG11	877.842	0.276408	0.292839	0.0978002	2.82625	0.00470964	0.0637668
CTA-384D8.35	42.5979	0.523629	0.70454	0.185339	2.82525	0.00472431	0.0638734
SNAPC3	519.38	0.334872	0.365995	0.118523	2.82539	0.00472235	0.0638734
AIM2	170.591	0.57062	0.876053	0.202095	2.82352	0.00474996	0.0639661
AP2B1	524.365	0.342242	0.375835	0.121216	2.82341	0.00475159	0.0639661
ARSB	820.427	0.245308	0.256516	0.0868766	2.82364	0.00474815	0.0639661
CD4	5309.06	-0.257146	-0.270165	0.0910645	-2.82378	0.00474609	0.0639661
RN7SL368P	36.3863	-0.582331	-0.935162	0.206222	-2.82381	0.00474565	0.0639661
RPSAP58	120.261	-0.255552	-0.268316	0.090506	-2.82359	0.00474887	0.0639661
ARID5B	194.912	0.573582	0.893022	0.203275	2.82171	0.00477688	0.0641686
HNRNPDL	2375.66	-0.188229	-0.193106	0.0667049	-2.82181	0.00477529	0.0641686
N4BP1	270.292	0.42904	0.505346	0.152035	2.82198	0.00477285	0.0641686
CTD-3092A11.1	105.75	-0.298211	-0.31937	0.105738	-2.82029	0.00479807	0.0644072
IDH1	2139.8	0.279047	0.296078	0.098951	2.82005	0.00480163	0.064409
C9orf172	17.3966	-0.503862	-0.653243	0.178693	-2.81972	0.00480661	0.0644298
ABCC9	183.649	0.195233	0.200712	0.0692529	2.81913	0.00481535	0.064501
SNRPN	371.256	-0.391437	-0.445495	0.138904	-2.81805	0.00483164	0.064661
TRIM34	12.6741	0.352773	0.390314	0.125191	2.81788	0.00483418	0.064661
NUDT15	189.93	-0.368938	-0.412659	0.130939	-2.81763	0.00483795	0.0646655
ADCK3	565.771	-0.338153	-0.370534	0.120114	-2.81527	0.00487357	0.0650491
GBAS	2659.5	-0.188725	-0.193667	0.0670356	-2.8153	0.00487316	0.0650491
DDA1	279.888	0.211888	0.218994	0.0753031	2.8138	0.004896	0.0650712
FCER1A	105.175	-0.489226	-2.43526	0.173865	-2.81382	0.00489566	0.0650712
GPR65	584.932	0.346797	0.382244	0.123235	2.8141	0.00489137	0.0650712
ISCA2	819.261	0.227182	0.236026	0.0807084	2.81485	0.00487993	0.0650712
RP11-297L17.6	215.611	0.198503	0.204291	0.0705316	2.81439	0.00488703	0.0650712
TTC3P1	67.3905	-0.289161	-0.308371	0.102763	-2.81386	0.00489512	0.0650712
BX470102.3	16.9789	0.536287	0.745717	0.19075	2.81147	0.0049316	0.0654607
FMR1	284.138	0.374233	0.420667	0.133111	2.81142	0.00493228	0.0654607
CLN3	163.104	0.186452	0.191231	0.0663597	2.80971	0.00495856	0.0657631
BRCA2	62.1656	0.559246	0.833517	0.199256	2.80667	0.00500565	0.066294
NUP88	343.387	-0.307534	-0.33121	0.109571	-2.8067	0.00500514	0.066294
RRM2	14.3522	0.327827	0.35726	0.116825	2.80613	0.00501407	0.0663587
MIR7845	8.96747	-0.574477	-0.904744	0.204895	-2.80376	0.00505099	0.0667819
NADK	3118.7	0.227326	0.236263	0.081083	2.80363	0.00505315	0.0667819
MRPL44	374.042	0.254468	0.267281	0.0907923	2.80275	0.00506687	0.0669162
CHIC2	591.168	0.186209	0.190998	0.0664676	2.8015	0.00508661	0.0670027
CSF3R	12339.5	-0.135743	-0.137554	0.0484472	-2.80188	0.00508054	0.0670027
GABARAPL2	1872.45	-0.147253	-0.149575	0.052559	-2.80167	0.0050839	0.0670027
PPP1R3B	126.791	0.482818	0.60987	0.172347	2.80143	0.00508768	0.0670027
TRMO	255.546	-0.40371	-0.465232	0.14412	-2.8012	0.00509125	0.0670027
ATPAF1	795.904	-0.305064	-0.328237	0.108936	-2.80041	0.00510384	0.0671214
RPS3AP30	11.4627	-0.386456	-0.438936	0.138044	-2.79952	0.00511784	0.0672584
OSCAR	1798.07	0.243329	0.254462	0.086932	2.79907	0.00512502	0.0673057
RBBP7	783.507	-0.233965	-0.24379	0.083615	-2.79812	0.00514008	0.0674093
RP1-257A7.4	20.325	-0.594759	-1.18783	0.212551	-2.7982	0.00513888	0.0674093
MID1IP1	499.535	-0.279957	-0.29746	0.100064	-2.79779	0.00514541	0.0674321
SGMS1	497.531	0.349394	0.386375	0.12499	2.79537	0.00518398	0.0678903
EXOSC2	161.732	-0.420157	-0.492178	0.150375	-2.79406	0.00520511	0.06809
RP11-30K9.6	21.8804	0.463616	0.571178	0.165934	2.79397	0.00520648	0.06809
ABCB6	21.4843	0.565561	1.73047	0.202518	2.79265	0.00522776	0.0681785
ADPGK-AS1	72.7302	-0.387779	-0.441252	0.138844	-2.79292	0.00522339	0.0681785
HIST2H4B	90.0689	0.401336	0.462282	0.143702	2.79284	0.00522477	0.0681785
TRMT10C	302.044	0.325819	0.354971	0.116659	2.79291	0.00522359	0.0681785
SBF2	609.096	0.287361	0.306562	0.102961	2.79098	0.00525486	0.0684844
SLC35A1	1779.67	-0.231715	-0.241299	0.0830347	-2.79058	0.00526133	0.0685213
RP5-1056L3.3	73.6692	-0.245918	-0.257508	0.0881573	-2.78954	0.00527837	0.0686955
PLCXD1	109.03	0.332546	0.363975	0.119317	2.78709	0.00531841	0.0691209
RP11-214O14.1	22.5932	-0.281399	-0.299351	0.100964	-2.78711	0.00531797	0.0691209
AF213884.2	21.7251	-0.528486	-0.727585	0.189718	-2.78565	0.00534211	0.0693809
NR4A3	13.3926	-0.55191	-1.74644	0.198165	-2.7851	0.00535116	0.0694506
CD300C	1630.86	0.197078	0.202867	0.0707751	2.78457	0.00535988	0.0695157
AKR1B1	892.142	-0.304897	-0.32834	0.109505	-2.78433	0.00536391	0.06952
DNAJB11	521.019	0.23526	0.245391	0.0845582	2.78222	0.00539877	0.0699236
PARL	1597.41	-0.164293	-0.167593	0.0590613	-2.78173	0.00540692	0.069958
RP11-705O1.8	20.1153	-0.537638	-0.758396	0.193283	-2.78162	0.00540887	0.069958
NPRL3	299.831	-0.367269	-0.411761	0.132064	-2.781	0.00541912	0.0699942
RHEB	1461.5	0.168678	0.172259	0.0606521	2.78107	0.00541808	0.0699942
ARGLU1	1921.77	-0.156425	-0.15927	0.0563063	-2.77811	0.00546769	0.0705246
SLC35E2	47.7362	-0.327362	-0.357281	0.117834	-2.77816	0.00546673	0.0705246
DUSP1	46413	-0.475426	-0.596446	0.171165	-2.77759	0.00547629	0.070587
RPS4XP11	8.86862	-0.399026	-0.459642	0.143865	-2.77362	0.00554371	0.071407
ACTR1A	1244.63	0.211151	0.21841	0.0761811	2.7717	0.0055764	0.071779
CTD-3092A11.2	102.981	-0.424182	-0.500743	0.15309	-2.77079	0.00559198	0.0718872
RP5-1136G13.2	29.8707	0.588389	1.14741	0.212356	2.77077	0.00559246	0.0718872
DYNLRB1	521.563	0.172371	0.17624	0.0622817	2.76761	0.00564688	0.0725371
GP2	14.0884	0.35079	0.389411	0.126862	2.76513	0.00569006	0.0730419
FGFR2	10.1147	0.407053	0.473172	0.147271	2.76398	0.00571017	0.0732
PLXNA3	56.5082	0.291068	0.31155	0.105307	2.76399	0.00570995	0.0732
CSDE1	4575.08	-0.183744	-0.188475	0.0665041	-2.76289	0.00572919	0.0733938
GLIPR2	7368.16	0.130571	0.132227	0.0472706	2.76221	0.00574119	0.0734465
PTK2B	1911.99	0.22874	0.238153	0.0828142	2.76208	0.00574343	0.0734465
SSR2	2977.73	-0.142502	-0.144665	0.0515939	-2.76199	0.00574503	0.0734465
TAP2	132.504	0.520501	0.713662	0.18847	2.76172	0.00574985	0.0734582
CACNA2D3	330.782	-0.461839	-0.570834	0.167285	-2.76079	0.00576621	0.0735328
PIK3IP1	463.792	-0.36196	-0.405004	0.131091	-2.76113	0.00576023	0.0735328
RP11-22N19.2	96.6298	-0.568985	-0.911639	0.2061	-2.76072	0.00576743	0.0735328
CPEB3	141.091	0.508012	0.67864	0.184061	2.76002	0.00577986	0.0735416
CTD-3131K8.2	44.8803	0.437581	0.52566	0.158541	2.76004	0.00577935	0.0735416
EIF1B	727.962	0.255135	0.268499	0.0924259	2.76043	0.00577259	0.0735416
B4GALT7	271.368	-0.302074	-0.325294	0.109477	-2.75924	0.00579354	0.0736657
PRKD2	275.539	0.382594	0.435462	0.138719	2.75804	0.00581486	0.0738869
AC013470.6	10.1872	0.418705	0.492979	0.151891	2.75662	0.00584018	0.0740496
MRPL1	133.759	0.340491	0.375486	0.123513	2.75671	0.00583854	0.0740496
SLC35B2	347.819	-0.314383	-0.340966	0.11403	-2.75703	0.00583298	0.0740496
ZNF778	70.1871	-0.469134	-0.586297	0.170195	-2.75644	0.00584343	0.0740496
SMAD1	101.18	0.533539	0.758211	0.193673	2.75485	0.0058719	0.0743603
RPL21P116	32.3601	-0.242211	-0.253567	0.0879887	-2.75276	0.00590957	0.0747869
FOSL1	58.063	0.579167	1.39431	0.210415	2.75251	0.0059141	0.0747939
RPS15A	615.722	-0.180158	-0.184645	0.0654619	-2.75211	0.00592125	0.0748339
ITPKB	207.54	-0.344065	-0.380422	0.125057	-2.75126	0.00593672	0.0749286
RNF175	67.0712	0.404843	0.470472	0.147138	2.75144	0.00593337	0.0749286
RP11-486A14.1	9.39463	0.389427	0.446212	0.141563	2.75091	0.00594294	0.0749569
ACSL4	1110.41	0.242781	0.254269	0.0882713	2.7504	0.00595223	0.0749977
INMT	35.7279	0.264412	0.279532	0.0961422	2.75022	0.00595548	0.0749977
LRRC25	6055.28	0.148058	0.150512	0.0538378	2.75008	0.00595815	0.0749977
PAQR7	199.12	-0.392405	-0.450662	0.142737	-2.74915	0.00597501	0.0751595
COPS9	511.649	-0.216116	-0.224061	0.0786186	-2.74892	0.00597922	0.0751622
PPOX	208.708	-0.373263	-0.421833	0.135802	-2.74859	0.00598529	0.0751882
DECR1	1436.5	0.249336	0.261871	0.090732	2.74804	0.00599519	0.0752121
RPSAP15	46.2409	-0.245178	-0.257046	0.0892153	-2.74816	0.00599308	0.0752121
JARID2	584.956	0.242984	0.254536	0.0884514	2.7471	0.00601256	0.0753351
TK2	448.651	-0.268204	-0.284063	0.0976326	-2.74707	0.00601302	0.0753351
GPBP1	1402.96	0.194994	0.200761	0.070997	2.74651	0.00602331	0.0753825
RCC2	258.702	0.334882	0.368226	0.121934	2.74643	0.00602482	0.0753825
RP11-1228E12.1	25.6486	0.431454	0.516176	0.157121	2.746	0.00603266	0.0754304
CARD16	2603.52	0.22887	0.238424	0.0833622	2.74548	0.00604222	0.0754494
RPL21P131	27.4037	-0.29305	-0.31427	0.106732	-2.74567	0.00603875	0.0754494
ANKRD44-IT1	27.3369	0.557003	0.863633	0.202898	2.74524	0.0060467	0.0754552
EEF2K	92.2824	-0.447358	-0.544568	0.162986	-2.74476	0.00605558	0.0755159
FAM89A	98.7374	0.543485	0.800758	0.19805	2.74418	0.00606629	0.0755993
MVB12A	379.24	-0.269412	-0.285561	0.0982086	-2.74327	0.00608312	0.0757588
RP11-147L13.2	28.3423	-0.417704	-0.491849	0.152281	-2.74299	0.00608833	0.0757734
CBWD3	689.55	0.236252	0.246851	0.0861528	2.74224	0.00610215	0.0757976
ROCK1P1	60.2271	0.38718	0.443332	0.141187	2.74231	0.00610085	0.0757976
RPS2P6	29.0416	-0.279627	-0.297884	0.101971	-2.74223	0.00610237	0.0757976
C19orf48	127.78	-0.469466	-0.589151	0.171232	-2.7417	0.00611222	0.0758698
LUC7L2	279.543	-0.215981	-0.223964	0.0788001	-2.74088	0.00612755	0.0760099
BEST1	1656.05	-0.336422	-0.370431	0.122813	-2.73932	0.00615671	0.0762207
TNS3	528.51	0.323001	0.352646	0.117901	2.73959	0.0061516	0.0762207
ZFP30	24.135	0.485388	0.626536	0.177185	2.73945	0.00615428	0.0762207
RP11-142L1.1	5.14701	-0.571078	-0.959098	0.208531	-2.73857	0.00617069	0.0762723
RP11-609N14.4	96.848	0.196922	0.202918	0.0719102	2.73844	0.00617305	0.0762723
SUGP1	320.031	0.299329	0.322291	0.109305	2.73847	0.00617256	0.0762723
RP11-756A22.7	24.5683	0.297101	0.319516	0.108511	2.73798	0.0061817	0.0763289
P4HTM	404.328	-0.297764	-0.320308	0.108772	-2.7375	0.00619081	0.0763913
CIR1	692.103	0.254473	0.267981	0.0929855	2.7367	0.00620589	0.0764244
RP11-15J10.1	208.542	0.24738	0.259715	0.0904002	2.73649	0.00620976	0.0764244
RP11-803D5.1	27.2407	0.567237	0.935963	0.207253	2.73692	0.00620164	0.0764244
SLC22A18	444.5	0.239501	0.250615	0.0875027	2.73707	0.00619893	0.0764244
R3HDM4	1300	0.175097	0.179258	0.0640031	2.73575	0.00622382	0.0764972
SNED1	18.1218	-0.581365	-1.13279	0.212494	-2.73591	0.0062208	0.0764972
HNRNPA1	2114.29	-0.173456	-0.177499	0.0634294	-2.73462	0.00624514	0.0767091
RN7SL96P	4.79713	0.452701	0.557347	0.165598	2.73373	0.00626213	0.0768676
HMGN2P8	121.74	0.168079	0.171753	0.0615142	2.73236	0.00628824	0.0771376
TAF1B	224.08	0.420292	0.498013	0.154109	2.72724	0.0063867	0.0782943
CBX1	248.41	-0.378292	-0.430365	0.138742	-2.72658	0.0063995	0.0782981
CYHR1	135.045	-0.303504	-0.327738	0.111303	-2.72684	0.00639444	0.0782981
LINC01001	64.2138	0.332933	0.366237	0.122099	2.72674	0.00639638	0.0782981
JUNB	22140.6	-0.354009	-0.395145	0.129901	-2.72521	0.006426	0.0785711
CHMP2B	1102.24	0.205958	0.21292	0.0755949	2.72449	0.00644011	0.0786924
SNHG11	111.888	-0.426917	-0.509399	0.15671	-2.72425	0.00644486	0.0786993
C11orf70	9.67387	0.390514	0.449695	0.143384	2.72355	0.00645854	0.0787403
COX6A1	782.494	0.182874	0.18768	0.0671483	2.72343	0.00646078	0.0787403
HIST2H2BF	47.5015	0.457149	0.567286	0.167852	2.72352	0.00645912	0.0787403
FTL	172425	0.123337	0.12477	0.0452953	2.72296	0.00646999	0.0788013
RP11-408P14.1	177.46	-0.204587	-0.211414	0.0751606	-2.722	0.00648879	0.0789792
MT-ND4	27112.2	-0.261699	-0.276658	0.0961642	-2.72137	0.00650116	0.0790785
HNRNPA0	276.663	-0.290671	-0.311782	0.106834	-2.72078	0.00651271	0.0791166
RP11-490H24.5	587.919	0.215286	0.223313	0.0791239	2.72087	0.00651109	0.0791166
HEG1	48.3907	0.57769	1.19096	0.212539	2.71804	0.00656708	0.0797255
PSPC1P1	48.6137	0.329899	0.362426	0.121441	2.71655	0.00659672	0.0800337
SCARB1	371.487	-0.340478	-0.376711	0.125398	-2.71517	0.00662415	0.0803147
SPATS2	94.6688	0.408924	0.479754	0.15063	2.71476	0.00663231	0.0803617
MCCC1	361.479	-0.297134	-0.319966	0.10946	-2.71455	0.00663667	0.0803627
TSPAN4	732.715	-0.317205	-0.345677	0.116925	-2.71288	0.00667004	0.0807148
RP1-101G11.3	40.9776	0.22416	0.233351	0.0826356	2.71264	0.00667503	0.0807231
MRPL30	152.48	-0.359292	-0.403154	0.132463	-2.71238	0.00668012	0.0807328
RP11-213G2.3	22.5093	-0.530102	-0.759823	0.195457	-2.71212	0.00668547	0.0807455
PKNOX1	203.883	0.397875	0.461925	0.146757	2.71112	0.00670573	0.0809383
RPL23AP42	134.405	-0.203404	-0.210168	0.0750431	-2.7105	0.00671823	0.0809851
SRA1	1696.77	0.201983	0.208604	0.0745149	2.71064	0.00671532	0.0809851
KPNA5	475.946	0.172457	0.176509	0.0636563	2.7092	0.0067446	0.0812508
CHD1L	391.36	-0.316363	-0.344722	0.116862	-2.70716	0.00678623	0.0816477
SC22CB-1E7.1	56.8417	-0.21764	-0.22603	0.0803908	-2.70728	0.00678376	0.0816477
DDIAS	190.684	-0.5105	-0.698176	0.188711	-2.7052	0.00682639	0.0819658
NIT2	319.251	-0.257006	-0.271301	0.0950088	-2.70508	0.00682889	0.0819658
RPL21P67	21.747	-0.284133	-0.303943	0.105039	-2.70502	0.00683012	0.0819658
2018-09-11	176.258	-0.383762	-0.439808	0.141853	-2.70536	0.00682301	0.0819658
SSR4	1330.94	0.141961	0.144194	0.0524962	2.7042	0.00684684	0.082114
PTDSS1	1398.04	-0.227509	-0.237194	0.0841434	-2.70382	0.00685465	0.0821552
DIS3L	362.062	-0.378118	-0.431298	0.139874	-2.70328	0.00686591	0.0822378
PCGF5	728.73	0.255425	0.269489	0.0945193	2.70236	0.00688492	0.0823923
SPAG5-AS1	53.6257	-0.492872	-0.650626	0.182394	-2.70223	0.00688758	0.0823923
RP11-638I2.2	9.39124	-0.500679	-0.671765	0.18534	-2.70141	0.00690452	0.0825424
APRT	2563.4	-0.15102	-0.153727	0.0559172	-2.70077	0.00691792	0.08265
EEF1GP2	4.88032	-0.451394	-0.558972	0.16748	-2.69521	0.00703447	0.0839891
APBB1IP	1754.25	0.159571	0.162795	0.0592211	2.6945	0.00704943	0.0840608
CERS4	132.804	-0.509365	-0.697981	0.189029	-2.69464	0.00704647	0.0840608
GTF2I	670.895	-0.231281	-0.241575	0.0858729	-2.69329	0.00707499	0.0842937
SLC1A3	58.5207	0.57011	1.28608	0.211688	2.69316	0.00707793	0.0842937
SFXN5	390.111	-0.274368	-0.292237	0.101885	-2.69292	0.00708292	0.0842997
AC009948.5	97.2099	0.44213	0.541217	0.164215	2.69238	0.00709435	0.0843824
FBXL14	29.9222	-0.564743	-0.972659	0.209911	-2.69039	0.00713677	0.0846552
FRK	179.075	0.175818	0.180185	0.0653367	2.69095	0.00712494	0.0846552
MOB1A	7677.35	0.144031	0.146392	0.0535382	2.69025	0.00713982	0.0846552
PRKCA	139.986	0.439252	0.535957	0.163251	2.69065	0.00713132	0.0846552
RPL23AP61	24.1622	-0.263181	-0.278791	0.0978121	-2.69068	0.00713073	0.0846552
ATP6AP2	10938.2	-0.154988	-0.157947	0.057631	-2.68932	0.00715969	0.0847202
GALNT3	191.418	0.47818	0.618706	0.177812	2.68924	0.00716155	0.0847202
GTF2IP4	567.556	-0.280815	-0.300166	0.104425	-2.68915	0.00716332	0.0847202
IQCC	16.0702	-0.46672	-0.591365	0.173527	-2.68961	0.00715347	0.0847202
ATXN3	600.165	0.158478	0.161654	0.0589896	2.68654	0.00721954	0.0852647
CAPNS1	1428.62	0.188154	0.193559	0.0700334	2.68662	0.0072178	0.0852647
SIK1	34.9905	-0.548073	-0.854126	0.204019	-2.68639	0.00722297	0.0852647
USP5	579.998	-0.314901	-0.343367	0.117271	-2.68526	0.00724742	0.0854996
WNT7B	19.7031	0.310818	0.338168	0.115804	2.684	0.00727479	0.0857686
ACADVL	4701.27	-0.160794	-0.164124	0.0599368	-2.68273	0.0073025	0.0860413
LINC00504	446.404	0.148718	0.151342	0.0554594	2.68157	0.00732773	0.0862845
SLC35F6	1126.51	0.197507	0.203824	0.0736652	2.68114	0.0073372	0.0863419
ARL14EP	492.773	-0.252184	-0.265906	0.0940733	-2.68072	0.00734638	0.0863958
RPL21P11	43.1173	-0.261558	-0.27699	0.0975868	-2.68026	0.00735648	0.0864605
PDCD10	1075.46	0.203722	0.210694	0.0760293	2.67952	0.00737289	0.0865992
FHOD1	615.444	0.206241	0.213496	0.0770046	2.6783	0.00739973	0.0868602
CD300LF	1663.39	-0.218808	-0.227554	0.0817343	-2.67706	0.00742712	0.0871273
UTRN	1446.93	0.249917	0.263333	0.0934483	2.67439	0.00748653	0.0877694
RIPK3	179.477	0.331414	0.365758	0.123944	2.6739	0.00749753	0.0878436
RP11-592N21.1	104.945	-0.197321	-0.203658	0.0738406	-2.67226	0.00753416	0.0881628
ZMPSTE24	840.564	-0.251205	-0.264852	0.0939983	-2.67245	0.00753006	0.0881628
RPS27AP2	24.8045	-0.292356	-0.314782	0.109413	-2.67205	0.00753901	0.0881647
GIMAP7	1849.19	0.441113	0.541817	0.165143	2.6711	0.00756042	0.0883601
AC023590.1	17.0604	0.336285	0.372562	0.125922	2.67058	0.00757214	0.0884413
CXCL16	1432.39	-0.246354	-0.259192	0.0922547	-2.67037	0.00757679	0.0884413
RP11-517I3.2	15.7354	0.326981	0.359933	0.122462	2.67006	0.00758371	0.0884671
SLC25A37	766.915	0.310519	0.338103	0.116308	2.6698	0.00758963	0.0884813
RP3-368A4.5	112.7	-0.418241	-0.499168	0.156785	-2.6676	0.00763951	0.0889525
WAC	1306.47	-0.160919	-0.164297	0.0603231	-2.66762	0.00763901	0.0889525
NDUFS6	568.254	0.151426	0.154228	0.0567742	2.66717	0.00764931	0.0890114
RP11-705C15.2	188.758	-0.309744	-0.337155	0.116218	-2.66519	0.00769448	0.0894816
VSIG10L	35.8875	0.566395	1.17014	0.212534	2.66497	0.00769957	0.0894855
ZMYM6	204.225	-0.31784	-0.34778	0.119285	-2.66455	0.00770915	0.0895414
RP11-887P2.3	739.958	0.218482	0.227286	0.0820134	2.66398	0.00772215	0.0896371
DKC1	487.885	-0.282154	-0.302251	0.105939	-2.66335	0.00773669	0.0897504
DGKE	78.7736	-0.465599	-0.593166	0.174833	-2.66311	0.00774222	0.0897592
AC004069.2	102.45	-0.20438	-0.211523	0.0767929	-2.66144	0.00778072	0.0901498
ATP5G3	2403.37	-0.147842	-0.150458	0.0555639	-2.66076	0.00779636	0.0902386
EPRS	846.876	-0.30182	-0.327039	0.113445	-2.66049	0.00780278	0.0902386
KHK	56.9907	-0.527637	-0.774441	0.198311	-2.66066	0.00779887	0.0902386
CXorf21	412.544	0.342499	0.381547	0.128771	2.65975	0.00781978	0.0903795
RP11-9J18.1	8.45467	0.382443	0.440908	0.143839	2.65882	0.0078414	0.0905737
NDUFA13	926.159	-0.131598	-0.133435	0.0495347	-2.65668	0.00789136	0.0909273
PARK7	2533.15	-0.139415	-0.141607	0.0524769	-2.65669	0.00789117	0.0909273
PTGS1	661.074	-0.307705	-0.334706	0.115823	-2.65669	0.00789126	0.0909273
U2AF1	643.996	0.13707	0.13915	0.0515914	2.65684	0.00788772	0.0909273
SLC25A25	128.98	0.468409	0.602054	0.176383	2.65563	0.00791601	0.0911554
LHFPL2	381.525	0.470717	0.607798	0.177377	2.65377	0.00795989	0.0916046
RPP30	339.923	-0.195181	-0.20141	0.0736094	-2.65158	0.00801156	0.0921427
SART1	222.196	0.346232	0.387145	0.130626	2.65056	0.00803579	0.0923649
FPR1	8631.52	0.28118	0.301316	0.10612	2.64964	0.00805779	0.0924709
MED10	610.306	-0.199943	-0.206672	0.075454	-2.64987	0.00805223	0.0924709
TRPV4	41.6085	0.563137	1.15996	0.21254	2.64956	0.00805977	0.0924709
IL13RA1	2812.61	-0.267763	-0.284888	0.101073	-2.64922	0.0080678	0.0925065
POLD2	347.412	-0.308376	-0.335791	0.116459	-2.64795	0.0080982	0.0927802
XX-FW83563B9.5	43.3816	-0.336362	-0.373315	0.127034	-2.64781	0.00810155	0.0927802
LYPLA2P2	18.5987	0.263881	0.28028	0.0996845	2.64716	0.0081171	0.0929017
RABGGTA	690.529	0.204282	0.211501	0.0771792	2.64685	0.00812458	0.0929307
JUN	2549.98	-0.473738	-0.615158	0.179092	-2.64522	0.00816367	0.0932713
NDUFA3	860.507	0.18483	0.190113	0.0698736	2.6452	0.00816428	0.0932713
RP11-46A10.6	9.14993	0.406291	0.480835	0.15361	2.64495	0.00817036	0.0932841
HLA-DQB2	242.027	-0.36446	-0.413761	0.13781	-2.64466	0.00817736	0.0933072
PPIH	101.492	-0.368092	-0.419249	0.139242	-2.64354	0.00820448	0.09356
PMAIP1	583.769	-0.443146	-0.548782	0.167785	-2.64115	0.00826242	0.0941636
SNTB1	716.434	0.254444	0.269071	0.0963574	2.64063	0.00827516	0.0942515
SRGAP1	125.71	0.441552	0.546704	0.167284	2.63954	0.0083019	0.0944988
DDX39A	1493.26	0.139884	0.14213	0.0530086	2.6389	0.00831762	0.0945919
TAB3	160.08	0.374814	0.429986	0.14204	2.63879	0.00832014	0.0945919
DNAJB5	21.5833	-0.556856	-1.25873	0.211064	-2.63832	0.00833175	0.0946094
TRIP6	52.9651	0.477881	0.628492	0.181123	2.63843	0.0083291	0.0946094
MTND4P12	914.789	-0.461919	-0.58915	0.175131	-2.63757	0.00835024	0.0947621
ACO1	246.836	-0.369485	-0.421668	0.140096	-2.63736	0.0083554	0.0947634
DSE	634.714	0.316944	0.347427	0.120203	2.63675	0.00837045	0.0948168
POU5F2	98.146	0.328964	0.363617	0.12477	2.63656	0.00837524	0.0948168
SSFA2	837.732	0.235974	0.247479	0.089487	2.63696	0.00836515	0.0948168
LINC01429	10.3196	0.381012	0.440058	0.144534	2.63615	0.00838524	0.0948728
PTPN6	7926.29	0.126728	0.128392	0.0480814	2.63569	0.00839656	0.0949438
ELMSAN1	842.789	0.265136	0.28195	0.100638	2.63455	0.00842479	0.0951763
RPL7P26	33.1222	-0.217716	-0.226639	0.0826416	-2.63445	0.00842725	0.0951763
SAFB	878.34	-0.18696	-0.192485	0.0709847	-2.63381	0.00844325	0.0952997
E2F2	128.026	0.487834	0.656247	0.185306	2.63259	0.00847378	0.0954845
JPX	201.193	0.300734	0.326327	0.11423	2.6327	0.00847083	0.0954845
LRPPRC	612.853	-0.282532	-0.303264	0.107323	-2.63254	0.00847487	0.0954845
CCT2	666.519	-0.21497	-0.223551	0.0816889	-2.63157	0.00849904	0.0956994
TYSND1	214.951	-0.353026	-0.397579	0.134179	-2.631	0.00851348	0.0958047
AFF3	48.6232	-0.450931	-0.566295	0.171408	-2.63075	0.00851976	0.0958061
UBE2E2	982.764	-0.202463	-0.209571	0.0769649	-2.63059	0.0085238	0.0958061
LILRA6	1950.16	0.239321	0.251427	0.0909848	2.63034	0.00852997	0.0958181
PKD2L1	12.2293	0.498371	2.02205	0.189525	2.62958	0.00854909	0.0959755
ARPC1A	1192.86	0.206069	0.213596	0.0783725	2.62935	0.00855485	0.0959829
DCUN1D4	235.608	-0.397531	-0.466775	0.151233	-2.62859	0.00857397	0.09614
ST13P4	16.5138	-0.319571	-0.351065	0.121589	-2.62829	0.00858151	0.0961672
PLXND1	349.388	-0.346963	-0.388988	0.132048	-2.62755	0.00860025	0.0963197
RP11-89K11.1	11.2789	-0.529857	-0.803623	0.201706	-2.62688	0.00861719	0.096452
TIMM17A	551.196	0.213382	0.221812	0.0812654	2.62575	0.00864595	0.0967163
FAM106A	24.5328	0.490562	0.666429	0.186896	2.62479	0.00867019	0.0969298
HP	883.751	0.555425	1.03043	0.211661	2.62412	0.0086872	0.0970621
AC111155.1	69.5926	0.175253	0.17981	0.0668278	2.62245	0.00873	0.0974825
OR7E66P	13.0722	0.385422	0.447624	0.147052	2.621	0.00876731	0.0978408
MRPL28	774.505	0.188192	0.193894	0.0718155	2.62049	0.00878041	0.097929
RACK1	4692.05	-0.140528	-0.142842	0.0536739	-2.61818	0.00884012	0.0985363
CCDC86	148.032	-0.344006	-0.385145	0.131406	-2.61789	0.00884761	0.0985614
GPBAR1	2321.61	0.278106	0.298073	0.106242	2.61767	0.00885314	0.0985646
BTG3	50.9332	0.522737	0.782498	0.199715	2.61741	0.00885999	0.0985825
RP11-48B14.1	9.74932	-0.380044	-0.439377	0.145382	-2.6141	0.00894629	0.0994838
PPEF2	20.1815	-0.303417	-0.330187	0.116124	-2.61287	0.00897846	0.0997825
KIAA0930	436.877	0.256525	0.271916	0.0981995	2.61229	0.00899383	0.0998942
SLC37A1	250.595	0.333078	0.37014	0.127526	2.61183	0.00900577	0.0999678
HPR	149.813	0.549331	0.970332	0.210347	2.61155	0.00901338	0.0999932
RPL7AP6	139.531	-0.205068	-0.21258	0.078533	-2.61124	0.00902157	0.100025
AC007879.5	19.1873	-0.451792	-0.571338	0.173078	-2.61034	0.00904528	0.100229
NECTIN2	423.007	0.435409	0.538099	0.166819	2.61008	0.00905223	0.100247
AMZ2P1	361.927	-0.278466	-0.298656	0.106749	-2.60861	0.00909104	0.100558
RPSAP5	7.81906	-0.416643	-0.501844	0.159711	-2.60874	0.00908764	0.100558
HMBS	379.482	-0.364966	-0.41643	0.140001	-2.60689	0.009137	0.101007
C11orf31	646.098	0.173864	0.178372	0.0667138	2.60612	0.00915739	0.101173
CTC-242N15.1	67.9206	0.25112	0.265573	0.0963829	2.60544	0.00917561	0.101196
HDAC9	316.271	-0.483252	-0.648422	0.185459	-2.60571	0.00916841	0.101196
RP11-172F10.1	6.13865	0.431233	0.530441	0.165503	2.60559	0.00917149	0.101196
CDC42EP2	310.869	0.409237	0.489547	0.157261	2.60228	0.00926062	0.102019
RPL7P44	22.7185	-0.283859	-0.305509	0.109082	-2.60226	0.00926114	0.102019
LILRA5	3123.5	0.295434	0.320227	0.113564	2.60147	0.00928258	0.102195
RP11-240E2.2	66.8739	-0.526202	-0.803192	0.202299	-2.60111	0.00929228	0.102242
B3GNT6	9.55691	-0.364865	-0.416774	0.140381	-2.59911	0.00934665	0.10257
CSTF2T	398.433	0.36324	0.414415	0.139749	2.59923	0.00934328	0.10257
DNAJC7	1197.36	0.152517	0.155539	0.0586689	2.59962	0.00933264	0.10257
RP11-154H23.4	13.9547	-0.535972	-0.860348	0.206199	-2.5993	0.00934135	0.10257
ZNF337-AS1	18.1741	-0.312937	-0.343074	0.120406	-2.59901	0.00934933	0.10257
HTRA1	16.6297	-0.511046	-1.65824	0.196657	-2.59866	0.00935876	0.102613
CES2	621.317	-0.237626	-0.249772	0.0914608	-2.59812	0.0093735	0.102655
MLEC	996.949	-0.24169	-0.254519	0.0930248	-2.59812	0.00937351	0.102655
KLHL21	341.33	-0.312868	-0.34303	0.120447	-2.59757	0.00938872	0.102762
TMEM140	206.359	0.44645	0.562839	0.171912	2.59697	0.00940501	0.10288
OSM	234.878	-0.551272	-1.14504	0.212369	-2.59582	0.00943656	0.103105
RP11-715J22.6	14.9271	-0.416985	-0.50397	0.160627	-2.59598	0.00943211	0.103105
LRRFIP1	5882.33	0.117803	0.119178	0.045399	2.59483	0.0094637	0.103342
RP11-131M11.3	31.4625	0.367654	0.421305	0.141704	2.59452	0.00947236	0.103376
GDPD5	376.514	0.364433	0.416521	0.140506	2.59372	0.00949451	0.103521
SLA	1537.87	0.311529	0.341433	0.120113	2.59364	0.00949662	0.103521
AC006026.1	10.7256	0.350295	0.395453	0.135091	2.59303	0.00951353	0.103529
HNRNPA1P7	38.4686	-0.273028	-0.292208	0.105294	-2.59301	0.0095139	0.103529
SPI1	7049.54	0.181355	0.18655	0.0699343	2.59322	0.00950806	0.103529
RP5-1021I20.5	30.4129	0.303444	0.330826	0.117108	2.59115	0.00956559	0.103971
TMEM222	368.557	0.260079	0.276474	0.100368	2.59125	0.00956268	0.103971
CHML	149.233	-0.466849	-0.60955	0.180215	-2.59052	0.00958324	0.103983
NFXL1	288.429	-0.502523	-0.712039	0.193959	-2.59087	0.00957329	0.103983
RGL1	194.255	0.535816	0.876939	0.206829	2.59062	0.00958024	0.103983
WAPL	1931.71	-0.178781	-0.18376	0.0690266	-2.59002	0.0095969	0.104071
LTB	154.674	-0.366348	-0.419519	0.141505	-2.58894	0.00962726	0.10434
PPIAL4C	27.4224	-0.236154	-0.248152	0.0912278	-2.58861	0.00963629	0.104377
CH507-42P11.8	38.2757	-0.536772	-0.880121	0.207505	-2.58679	0.00968759	0.104873
MED1	377.88	-0.317663	-0.349791	0.122839	-2.586	0.00970958	0.10505
ARF5	2684.4	-0.108941	-0.110033	0.0421411	-2.58514	0.00973382	0.105252
SERF1B	35.8293	-0.484597	-0.658851	0.187714	-2.58158	0.009835	0.106285
ZNF586	166.604	-0.400971	-0.476432	0.155332	-2.58138	0.00984069	0.106285
SLC39A9	553.923	-0.32322	-0.357549	0.125299	-2.57959	0.00989165	0.106774
PA2G4	604.852	-0.174643	-0.179314	0.0677186	-2.57895	0.00991006	0.106911
RP11-16E23.4	204.997	0.309962	0.339776	0.120207	2.57857	0.00992104	0.106969
TVP23C	127.471	0.331724	0.369475	0.12866	2.5783	0.00992867	0.106989
EIF5AP2	59.958	0.209078	0.217298	0.0811033	2.57792	0.0099397	0.107047
ATP1B3P1	23.4828	0.29083	0.314899	0.112864	2.57682	0.00997136	0.107265
PI4K2B	93.1227	0.432666	0.536891	0.167897	2.57697	0.00996704	0.107265
RP11-139K1.2	7.94579	0.54479	1.24543	0.211472	2.57619	0.00998965	0.1074
RP11-296E23.2	7.22297	0.400558	0.476629	0.155503	2.57588	0.00999847	0.107434
KLK7	6.67046	0.418797	0.510072	0.162607	2.57551	0.0100091	0.107486
AC011933.2	38.5398	-0.266718	-0.28478	0.103621	-2.57399	0.0100534	0.107888
RP11-284A20.3	5.57264	0.435777	0.543852	0.169311	2.57383	0.010058	0.107888
FAM21FP	99.5022	0.222378	0.232422	0.0864562	2.57214	0.0101071	0.108353
RP11-44M6.7	157.104	0.19273	0.199126	0.0749406	2.57177	0.010118	0.108408
AC092933.4	43.8846	0.232413	0.244011	0.0903911	2.57119	0.0101349	0.108496
RPL12P38	246.384	0.14729	0.150067	0.057287	2.5711	0.0101377	0.108496
AC124944.3	14.4845	0.304334	0.33262	0.118448	2.56934	0.0101892	0.108761
GLUD1	2547.61	-0.173059	-0.177635	0.0673564	-2.5693	0.0101904	0.108761
MACF1	663.882	0.237189	0.249581	0.092318	2.56926	0.0101915	0.108761
WDR54	63.9493	-0.490742	-0.681043	0.190998	-2.56936	0.0101885	0.108761
ZNF213-AS1	72.494	-0.379028	-0.440599	0.147496	-2.56976	0.0101768	0.108761
RP11-587D21.1	125.268	-0.157855	-0.161299	0.0614608	-2.56839	0.0102172	0.108974
LINC00959	41.3077	-0.507378	-0.740293	0.197615	-2.56751	0.0102433	0.10919
RP11-474G23.3	12.5428	-0.529523	-0.85355	0.206381	-2.56576	0.010295	0.10968
CTD-2270N23.1	44.8843	-0.227869	-0.238787	0.0888552	-2.5645	0.0103326	0.109956
SLED1	10.2792	0.526418	1.49261	0.205288	2.5643	0.0103385	0.109956
SRP72	1111.8	-0.183739	-0.189277	0.0716476	-2.56449	0.0103329	0.109956
RP1-17K7.2	15.4193	0.540932	0.977592	0.21105	2.56305	0.0103756	0.110288
RPL9P7	406.563	-0.178194	-0.183234	0.0695295	-2.56285	0.0103815	0.110289
SMIM15	660.435	0.250273	0.265112	0.0976937	2.56181	0.0104127	0.110557
YPEL3	1213.35	-0.181934	-0.18732	0.071045	-2.56083	0.0104423	0.110809
ENTPD6	872.258	0.192758	0.19922	0.0752989	2.5599	0.0104702	0.111042
GAS7	1496.28	-0.204997	-0.212843	0.0801081	-2.559	0.0104973	0.111266
RPL23AP65	189.723	-0.176817	-0.181749	0.0691049	-2.55867	0.0105074	0.111311
AC008079.10	71.0216	0.269928	0.289032	0.105567	2.55693	0.01056	0.111742
CAMK1D	326.827	-0.322865	-0.357805	0.126264	-2.55707	0.0105559	0.111742
CREBL2	798.885	-0.330312	-0.368185	0.12921	-2.5564	0.0105762	0.11185
AC007386.2	20.3206	0.289757	0.31405	0.113371	2.55582	0.0105937	0.111927
RP11-388C12.8	40.3309	0.263402	0.281051	0.103062	2.55577	0.0105954	0.111927
HIGD1A	1568.47	0.194028	0.200655	0.0759561	2.55448	0.0106346	0.112278
GOT2	433.153	-0.329829	-0.367577	0.129128	-2.55428	0.0106407	0.112281
RP11-345P4.9	136.914	-0.376669	-0.437868	0.147486	-2.55394	0.0106512	0.112327
REEP4	761.946	0.195797	0.202625	0.0766996	2.55278	0.0106868	0.11264
PRELID1P4	77.3725	0.177676	0.182717	0.0696208	2.55205	0.0107092	0.112813
RP11-333E13.2	75.6995	-0.213097	-0.222024	0.0835391	-2.55087	0.0107455	0.113131
IGSF9	4.98446	-0.536483	-1.25317	0.210344	-2.5505	0.0107568	0.113188
CTA-331P3.1	28.6178	0.536502	1.28236	0.210488	2.54884	0.0108081	0.113663
RP11-656E20.5	10.9193	-0.53838	-0.96813	0.211302	-2.54792	0.0108368	0.113902
AP000476.1	83.4225	0.203525	0.211273	0.0798904	2.54755	0.0108483	0.113959
RP11-1H15.2	11.8112	0.436854	0.550417	0.171583	2.54602	0.0108958	0.114394
SARS2	10.7525	-0.440482	-0.557071	0.173069	-2.54512	0.0109239	0.114624
TMEM119	13.4647	0.540716	1.12933	0.212496	2.54459	0.0109405	0.114735
F13A1	6891.48	-0.400576	-0.479152	0.157548	-2.54256	0.0110044	0.11534
SEPT2P1	9.30917	-0.347627	-0.393721	0.136767	-2.54174	0.0110302	0.115546
PPM1F	1001.48	-0.202331	-0.209972	0.0796116	-2.54148	0.0110385	0.115569
RELA	803.145	0.203291	0.211064	0.0800483	2.53961	0.0110978	0.116125
GRK2	1069.59	0.148555	0.151482	0.0585157	2.53872	0.0111259	0.116355
CELF1	1476.13	-0.189334	-0.195553	0.0746034	-2.53788	0.0111527	0.11657
AC083884.8	12.9315	0.49305	0.70438	0.194416	2.53606	0.0112108	0.117047
ACAD8	304.195	-0.314685	-0.347309	0.124086	-2.53602	0.0112121	0.117047
TMEM218	386.586	-0.293637	-0.319392	0.115794	-2.53587	0.011217	0.117047
CMKLR1	203.028	0.51341	0.791251	0.202491	2.53546	0.0112299	0.117116
C1RL-AS1	25.9434	0.437411	0.552799	0.172539	2.53514	0.0112401	0.117158
GPR61	6.55762	-0.475526	-1.82888	0.187648	-2.53414	0.0112723	0.117428
RP11-162G10.5	12.286	-0.487343	-1.71352	0.192409	-2.53285	0.0113139	0.117796
CD72	21.6714	0.536833	1.18414	0.211989	2.53236	0.0113297	0.117896
CX3CL1	17.7488	0.257679	0.274437	0.101776	2.53182	0.0113473	0.118014
SPAG5	8.9455	0.414959	2.91203	0.163956	2.53093	0.0113762	0.118248
STAMBPL1	35.9545	0.502024	0.742037	0.198396	2.53041	0.0113929	0.118356
CDKL5	61.9253	0.459684	0.606205	0.181686	2.5301	0.011403	0.118396
AKR1B1P2	8.16806	-0.41262	-0.502784	0.163173	-2.52872	0.011448	0.118797
LINC00630	22.4831	-0.512303	-0.785294	0.202644	-2.5281	0.0114683	0.118942
LINC00936	1510.75	-0.398131	-0.476201	0.157529	-2.52736	0.0114925	0.119128
GAPDHP60	4.96127	0.528821	0.9105	0.209284	2.52681	0.0115103	0.119237
RP11-472N13.3	7.94577	-0.525565	-0.87026	0.208009	-2.52665	0.0115157	0.119237
NF2	468.596	-0.242003	-0.255721	0.0958053	-2.52599	0.0115373	0.119371
TBC1D1	693.17	0.253495	0.269469	0.10036	2.52587	0.0115413	0.119371
RP11-122G18.7	21.7178	-0.298529	-0.325977	0.118198	-2.52566	0.0115482	0.119376
ZNF862	79.2185	-0.495007	-0.712839	0.196049	-2.52491	0.0115727	0.119564
BCL10	543.502	0.208549	0.217092	0.0826468	2.52338	0.0116233	0.119954
C20orf24	550.782	0.140742	0.143252	0.0557731	2.52347	0.0116203	0.119954
RP11-425L10.1	230.981	-0.180195	-0.185585	0.0714272	-2.52278	0.0116432	0.120094
RP11-284F21.8	18.0211	0.304935	0.334765	0.120909	2.52202	0.0116684	0.120288
BLOC1S2P1	17.0267	0.260561	0.27812	0.103347	2.52123	0.0116945	0.120292
ECHDC2	57.1912	0.474945	0.650636	0.188367	2.52138	0.0116895	0.120292
PNRC2P1	78.5034	0.264329	0.282747	0.104833	2.52143	0.011688	0.120292
RNF216	837.905	-0.240508	-0.254008	0.0953797	-2.52158	0.0116828	0.120292
THNSL1	9.10554	-0.531367	-0.938558	0.210775	-2.52102	0.0117016	0.1203
ARRDC4	919.898	-0.364092	-0.419963	0.144476	-2.52008	0.0117328	0.120516
ERMN	41.3709	0.532412	1.22557	0.2113	2.5197	0.0117455	0.120516
MYL6B	25.3115	0.501408	0.745138	0.199002	2.51962	0.0117482	0.120516
RP11-142L4.2	12.6302	-0.411522	-0.501458	0.163319	-2.51974	0.0117442	0.120516
HAPLN3	19.1153	0.486414	1.81492	0.193101	2.51896	0.0117703	0.120676
RPS6P25	62.5804	-0.233934	-0.246316	0.0928813	-2.51863	0.0117812	0.120722
AC008810.1	12.9172	0.313906	0.34701	0.124694	2.51741	0.011822	0.120811
CD47	2588.48	0.178324	0.183569	0.0708189	2.51802	0.0118016	0.120811
CTD-3184A7.4	102.908	-0.342704	-0.387585	0.136122	-2.51762	0.011815	0.120811
NCAPH2	115.946	-0.437769	-0.555364	0.173873	-2.51775	0.0118108	0.120811
RPS3AP53	11.1006	-0.361166	-0.415537	0.143465	-2.51745	0.0118209	0.120811
RP11-345J18.2	9.26765	0.453871	2.20989	0.180308	2.5172	0.0118292	0.120819
SLC25A6P2	6.40509	-0.375088	-0.438067	0.149095	-2.51577	0.0118772	0.121243
ABCD1	476.855	0.218576	0.22857	0.0869139	2.51485	0.0119082	0.121442
FAM9C	15.4013	0.322825	0.359303	0.128369	2.51481	0.0119096	0.121442
CDKN1B	194.483	-0.327703	-0.366113	0.130325	-2.51451	0.0119198	0.12148
MT1X	105.709	0.356546	0.408789	0.141807	2.5143	0.0119268	0.121485
RP11-26H16.1	16.5451	-0.283218	-0.306485	0.112689	-2.51327	0.0119618	0.121776
CASC4	1190.86	-0.211591	-0.220616	0.084217	-2.51245	0.0119897	0.121993
ST13P3	26.8309	-0.25653	-0.273309	0.10214	-2.51155	0.0120204	0.12224
CALML4	185.421	0.248747	0.263969	0.0990654	2.51093	0.0120413	0.12232
CTD-2033A16.2	123.242	-0.188082	-0.194315	0.0749028	-2.51102	0.0120384	0.12232
RNU2-63P	11.5656	-0.532198	-0.992861	0.212045	-2.50984	0.0120786	0.1225
RP11-1094M14.11	189.339	-0.252231	-0.268156	0.100495	-2.50988	0.0120771	0.1225
STAB1	1015.45	0.313734	0.346936	0.12499	2.51008	0.0120702	0.1225
TUBB1	28.9013	0.525945	1.30138	0.209625	2.50898	0.0121079	0.122731
LA16c-60D12.2	116.673	0.165066	0.16923	0.0657974	2.50871	0.0121174	0.122762
GINS1	11.7085	-0.529491	-0.945536	0.211144	-2.50772	0.0121512	0.123038
ISCA1P1	20.1645	-0.366056	-0.42391	0.146034	-2.50666	0.0121878	0.123342
KIAA0040	922.696	0.289875	0.315285	0.115666	2.50613	0.012206	0.123459
PPP1R16B	76.0054	0.527668	1.25528	0.210586	2.50571	0.0122205	0.12354
PPP1R16A	63.8916	-0.416047	-0.512407	0.166206	-2.5032	0.0123075	0.124352
NDUFB9P2	51.4937	0.228424	0.240081	0.0913059	2.50175	0.0123583	0.124798
TOE1	119.267	-0.39599	-0.474829	0.158307	-2.5014	0.0123703	0.124852
RPS24	1381.71	-0.144402	-0.14717	0.057753	-2.50034	0.0124073	0.125091
SLC11A1	4044.61	0.225564	0.236759	0.0902084	2.50048	0.0124026	0.125091
HNRNPA1P54	83.1887	0.166531	0.170839	0.0666294	2.49936	0.0124419	0.125311
RP11-521B24.3	19.5882	0.303857	0.333913	0.121575	2.49934	0.0124424	0.125311
FRMD8	747.262	-0.196258	-0.203457	0.0785442	-2.4987	0.012465	0.125471
ARF6	4616.45	0.167377	0.171757	0.0670027	2.49807	0.0124872	0.125627
SDHB	2096.71	0.120505	0.122099	0.0482447	2.4978	0.0124968	0.125657
HLA-W	5.17229	0.445723	0.579063	0.17855	2.49635	0.0125477	0.126101
FCHSD2	708.561	-0.207298	-0.215874	0.0830478	-2.49612	0.0125559	0.126116
LINC01088	19.8884	0.288785	0.31422	0.115702	2.49593	0.0125626	0.126116
GOSR1	320.792	0.232881	0.24535	0.0933312	2.49521	0.0125881	0.126194
HERC2P4	6.12794	-0.492038	-0.716335	0.197198	-2.49515	0.0125905	0.126194
SLC12A7	688.983	0.309948	0.342254	0.124219	2.49518	0.0125894	0.126194
SH3RF2	9.77954	0.345018	0.392377	0.13829	2.49488	0.0126	0.126221
FN3KRP	378.326	-0.262896	-0.281399	0.105403	-2.4942	0.0126243	0.126397
DDB1	1201.89	-0.215726	-0.22549	0.0865364	-2.4929	0.0126705	0.126665
ILF3-AS1	281.899	-0.24098	-0.254912	0.0966674	-2.49288	0.0126712	0.126665
SLC40A1	1970.2	-0.377617	-0.443693	0.151467	-2.49306	0.0126647	0.126665
AC010677.5	21.8695	-0.273122	-0.294192	0.109618	-2.49157	0.0127181	0.127066
SPNS1	1360.61	-0.181712	-0.187403	0.0729525	-2.49083	0.0127444	0.127261
CDK18	33.3223	0.528845	1.12853	0.21234	2.49056	0.0127542	0.127292
PCED1B	11.7725	0.44331	2.25457	0.178014	2.49032	0.0127628	0.12731
ING2	189.327	-0.280846	-0.304034	0.112856	-2.48854	0.0128268	0.12788
FGFR1	39.0019	-0.526043	-0.953022	0.211498	-2.48722	0.0128744	0.128131
NUBP2	571.236	-0.185134	-0.191186	0.0744358	-2.48716	0.0128767	0.128131
TIMM50	419.318	-0.215575	-0.225363	0.0866637	-2.48749	0.0128648	0.128131
TMEM203	709.512	-0.214593	-0.224244	0.0862827	-2.48709	0.0128793	0.128131
ZNF492	16.6899	0.278792	0.30148	0.112167	2.4855	0.012937	0.128637
RPL10P15	36.8758	-0.35921	-0.414314	0.144538	-2.48524	0.0129466	0.128665
GSDMC	10.5294	0.434991	0.555867	0.175088	2.48442	0.0129763	0.128892
FTLP2	1003.45	0.113324	0.114662	0.045654	2.48223	0.0130562	0.129617
POTEE	414.365	0.118503	0.120036	0.047745	2.48199	0.0130652	0.129638
RP11-5G9.5	4.98797	-0.513296	-1.3336	0.20683	-2.48173	0.0130746	0.129663
MTND2P12	12.6962	0.33992	0.385542	0.137023	2.48076	0.0131104	0.12988
RPL31P63	79.9422	-0.18622	-0.192414	0.0750639	-2.48082	0.013108	0.12988
RP11-160H22.3	12.7093	-0.526557	-1.10213	0.212308	-2.48015	0.0131327	0.130033
BCCIP	1044.96	0.179043	0.18453	0.0722	2.47981	0.0131451	0.130087
RP11-165F24.3	33.5588	0.482112	0.689363	0.194558	2.47799	0.0132124	0.130684
HNRNPA1L2	252.916	-0.18215	-0.187952	0.0735378	-2.47696	0.0132505	0.130924
TMEM245	262.413	-0.366261	-0.426166	0.147861	-2.47707	0.0132468	0.130924
UBE2SP1	71.7276	0.294243	0.321761	0.118803	2.47673	0.0132593	0.130942
ELOVL3	63.427	0.517223	0.8798	0.208878	2.47619	0.0132791	0.130976
LILRB5	94.4254	0.358571	0.41421	0.144814	2.47607	0.0132837	0.130976
RP5-1096D14.6	4.97575	0.414324	0.513389	0.167319	2.47625	0.0132772	0.130976
KCTD20	1456.23	-0.232888	-0.245566	0.0940821	-2.47537	0.0133096	0.131163
TRAF3	343.685	-0.216723	-0.226796	0.0875889	-2.47432	0.0133489	0.131481
RP11-259N19.1	9.855	-0.521096	-0.918605	0.210695	-2.47323	0.0133899	0.131746
TXNDC16	169.183	-0.411897	-0.507765	0.16653	-2.47341	0.0133831	0.131746
P3H4	34.4209	-0.258329	-0.276153	0.104497	-2.47212	0.0134315	0.132086
TSPYL4	237.009	-0.370585	-0.433617	0.149955	-2.47131	0.013462	0.132318
CCNG2	433.851	-0.273674	-0.295319	0.110817	-2.4696	0.0135265	0.132744
COX14	810.871	-0.136479	-0.138867	0.0552632	-2.46961	0.013526	0.132744
MRPL3P1	26.032	-0.291168	-0.31783	0.117893	-2.46977	0.01352	0.132744
CTD-2246P4.1	27.7337	0.220949	0.231732	0.0895026	2.46863	0.0135631	0.133033
CCDC174	394.523	0.249543	0.265537	0.101113	2.46796	0.0135886	0.133213
TPT1P6	36.0673	-0.246025	-0.261303	0.0997447	-2.46655	0.0136422	0.13367
C5orf24	435.789	-0.31698	-0.352847	0.12853	-2.46619	0.0136557	0.133732
ITGB2	29396	0.146715	0.149708	0.0595048	2.46559	0.0136786	0.133887
IPO5	399.72	-0.30339	-0.334221	0.123076	-2.46505	0.0136993	0.13402
DESI1	402.4	0.252936	0.269722	0.10267	2.46358	0.0137559	0.134503
MALT1	776.06	-0.195141	-0.202435	0.0792362	-2.46278	0.0137864	0.134731
SYT5	14.2572	0.364998	0.425741	0.148232	2.46234	0.0138034	0.134827
AC007040.11	8.75746	0.409773	0.505594	0.166443	2.46195	0.0138185	0.134881
TOMM7	698.029	-0.187029	-0.193416	0.0759719	-2.46182	0.0138233	0.134881
ECHDC1	1382.2	-0.214566	-0.224445	0.0872137	-2.46024	0.0138845	0.135408
FAM136A	598.792	-0.240311	-0.254564	0.0977601	-2.45817	0.0139648	0.136121
TSKU	15.9974	0.291552	0.318797	0.118712	2.45595	0.0140512	0.136891
MZT2B	109.394	-0.206368	-0.215128	0.0840382	-2.45564	0.0140633	0.136939
SRRM1	1610.75	0.118242	0.119799	0.0481548	2.45545	0.014071	0.136943
RP1-197B17.3	10.0153	0.518521	0.94383	0.211216	2.45493	0.014091	0.136996
RPL7P2	12.3657	-0.320491	-0.358254	0.130542	-2.45508	0.0140853	0.136996
KPNA1	509.713	-0.269647	-0.29055	0.109879	-2.45403	0.0141264	0.137269
KIAA1257	37.8396	-0.2876	-0.313582	0.117215	-2.4536	0.0141434	0.137292
RP11-438L7.1	24.3376	0.259098	0.277437	0.105592	2.45377	0.0141368	0.137292
CHP1	3941.43	-0.250122	-0.266459	0.10201	-2.45192	0.0142095	0.137812
TFPT	75.7716	0.323786	0.363171	0.132057	2.45187	0.0142116	0.137812
MEF2A	1260.98	0.232228	0.245076	0.0947249	2.45161	0.014222	0.137841
RGS1	68.2514	-0.423169	-2.10634	0.172635	-2.45123	0.0142368	0.137842
RP11-486I11.2	52.6862	-0.464659	-0.638875	0.189559	-2.45127	0.0142355	0.137842
LINC00339	108.639	-0.295153	-0.323631	0.120434	-2.45076	0.0142556	0.137953
OLFM1	82.524	-0.488599	-0.724334	0.199409	-2.45024	0.0142761	0.13808
GNB5	72.2925	-0.464633	-0.639371	0.189646	-2.45001	0.0142853	0.138099
GPALPP1	177.692	0.320033	0.357901	0.130696	2.44867	0.0143383	0.13854
FAM110A	483.867	-0.254443	-0.271785	0.103927	-2.44829	0.0143537	0.138617
CTD-2561J22.5	22.7103	0.282025	0.306477	0.115202	2.44809	0.0143615	0.138621
CNOT8	2281.02	-0.155955	-0.159624	0.0637123	-2.44779	0.0143734	0.138665
KIF9-AS1	19.2684	-0.511374	-0.862114	0.208998	-2.44678	0.0144138	0.138983
RP11-981G7.1	16.7894	0.356152	0.412276	0.145597	2.44614	0.0144393	0.139158
PHIP	1767.64	0.163954	0.168249	0.0670383	2.44568	0.0144581	0.139268
HMGN2	4503.74	0.118399	0.119978	0.0484375	2.44437	0.0145104	0.139531
HP1BP3	2151.81	-0.167307	-0.171884	0.0684411	-2.44454	0.0145037	0.139531
MRPL3	933.418	-0.213137	-0.222947	0.0871993	-2.44426	0.0145151	0.139531
SEH1L	362.698	-0.262995	-0.282403	0.107578	-2.44469	0.0144976	0.139531
SMPD1	132.896	0.280708	0.304922	0.114875	2.44359	0.0145419	0.139716
RPS3AP33	10.6518	-0.317578	-0.354534	0.129978	-2.44333	0.0145525	0.139747
EIF3M	1753.32	-0.107253	-0.108423	0.0439206	-2.44197	0.0146072	0.140201
SRP72P1	6.56164	-0.38574	-0.462349	0.157979	-2.44172	0.0146173	0.140226
GMPSP1	19.8554	-0.327949	-0.369477	0.134331	-2.44134	0.0146328	0.140303
TRPM6	36.6899	0.21154	0.221166	0.0866598	2.44104	0.0146451	0.14035
ECE1	991.084	0.289634	0.31663	0.118661	2.44085	0.0146526	0.14035
CLEC17A	7.72632	-0.487949	-1.48106	0.199948	-2.44037	0.0146721	0.140465
SCD5	47.7106	0.283572	0.308744	0.116241	2.4395	0.0147074	0.140732
CCDC97	376.923	0.277968	0.301503	0.113992	2.43848	0.0147491	0.140844
CSPP1	155.647	-0.351002	-0.404327	0.143938	-2.43856	0.014746	0.140844
GOLT1B	616.837	0.271854	0.293687	0.111467	2.43887	0.0147333	0.140844
RP11-319G9.3	6.02028	0.435266	2.18279	0.178499	2.43848	0.0147491	0.140844
SLC35B4	219.611	-0.313775	-0.349396	0.128708	-2.43789	0.0147731	0.141001
MTCH1	2695.51	-0.138359	-0.140918	0.0567692	-2.43722	0.0148007	0.141192
GTPBP10	135.291	0.350112	0.403268	0.143693	2.43653	0.0148289	0.141318
RP11-395A13.2	64.4389	-0.306763	-0.339729	0.125893	-2.4367	0.0148218	0.141318
HIST1H4J	8.98121	0.51693	0.99133	0.212188	2.43618	0.0148431	0.141382
AC068491.3	9.5274	0.388716	0.468633	0.159588	2.43575	0.0148609	0.14148
EIF4G2	13134.6	-0.143634	-0.146513	0.0589979	-2.43457	0.0149097	0.14167
RP11-180M15.7	41.7473	-0.479135	-0.694195	0.196779	-2.43489	0.0148965	0.14167
RP11-471B22.3	36.8642	-0.380492	-0.453323	0.156266	-2.4349	0.014896	0.14167
ZNF880	69.7876	-0.431709	-0.556161	0.177327	-2.43453	0.014911	0.14167
AC004893.11	43.6426	-0.332534	-0.376512	0.136623	-2.43394	0.0149353	0.141761
HAUS1P2	8.34772	0.372422	0.439995	0.153013	2.43393	0.0149358	0.141761
CD300LB	616.17	-0.214862	-0.22503	0.0883256	-2.43261	0.0149903	0.142062
DENND5A	536.819	0.251459	0.268416	0.103377	2.43244	0.0149976	0.142062
RP11-115H15.2	14.5094	0.434519	0.564154	0.178598	2.43295	0.0149765	0.142062
TMLHE	329.564	-0.253988	-0.271481	0.104408	-2.43265	0.0149886	0.142062
RP13-585F24.1	67.4665	-0.205152	-0.213922	0.0843929	-2.43091	0.015061	0.14259
NHP2	403.525	-0.14306	-0.145915	0.0588815	-2.42963	0.0151143	0.143023
CCDC82	352.703	-0.257688	-0.276109	0.106114	-2.4284	0.0151654	0.143434
CTB-50L17.16	5.67699	-0.440314	-0.579284	0.181342	-2.42808	0.0151789	0.14349
NPM1P19	17.2838	-0.279185	-0.30326	0.115014	-2.42741	0.0152072	0.143685
EEF1B2P1	22.324	-0.338387	-0.385765	0.13946	-2.42641	0.0152489	0.144007
TEX261	641.076	-0.332342	-0.376604	0.136988	-2.42606	0.0152636	0.144043
ZNF91	98.281	-0.450432	-0.605126	0.185672	-2.42596	0.0152682	0.144043
DBP	168.698	-0.342338	-0.3918	0.141261	-2.42344	0.0153743	0.144972
C4orf36	64.7976	0.210231	0.219825	0.0867694	2.42288	0.0153982	0.145052
RP11-295P9.2	5.04942	0.493083	1.45487	0.203501	2.423	0.0153929	0.145052
CCSER2	614.556	0.260082	0.27922	0.107377	2.42214	0.0154296	0.145202
FAM72B	24.7617	0.448216	0.602346	0.185039	2.42228	0.0154233	0.145202
RPAP2	539.073	0.147173	0.150318	0.0608246	2.41963	0.0155364	0.146134
[truncated: 34,893 more rows]

## Sheet: cMo-IFNneg-vs-HC
Supplemental Table S3. The combined analysis results of differentially expressed genes (DEGs) and differentially connected genes (DEGs) between IFNpos and IFNneg in classical monocytes (related to Figure 2C).
GENE	baseMean	log2FoldChange	lfcMLE	lfcSE	stat	pvalue	padj
RBKS	62.0043	-0.630674	-1.17436	0.12514	-5.03974	4.66164e-07	0.00903613
MTCO1P40	890.275	-0.604904	-1.36259	0.124446	-4.86078	1.16923e-06	0.0113322
C12orf66	71.1891	-0.527228	-0.720263	0.111301	-4.73696	2.16953e-06	0.014018
EIF1B	823.549	0.342197	0.378258	0.0735886	4.65013	3.31722e-06	0.0160752
ZMIZ1-AS1	5.09554	-0.385586	-3.04638	0.0868922	-4.43752	9.10008e-06	0.0352792
ABHD10	411.954	-0.372283	-0.439161	0.0902275	-4.12605	3.69044e-05	0.0608539
BBS9	123.233	0.503703	0.800211	0.120772	4.17069	3.03674e-05	0.0608539
DUSP6	7225.79	0.450586	0.591666	0.106618	4.22617	2.37704e-05	0.0608539
MYADM	2064.66	0.41933	0.525768	0.100573	4.16942	3.05376e-05	0.0608539
NCMAP	35.5159	0.383515	0.459467	0.0930566	4.12131	3.76727e-05	0.0608539
PTGER2	2077.76	0.469311	0.642823	0.111038	4.22656	2.3729e-05	0.0608539
RRM2	17.8072	0.464696	0.644115	0.11201	4.14872	3.34344e-05	0.0608539
SNW1	1482.19	-0.209091	-0.218603	0.051177	-4.08564	4.39546e-05	0.0655398
CDKN1B	201.421	-0.368807	-0.438451	0.0917935	-4.01779	5.8746e-05	0.0669842
CYB5D2	157.749	-0.385344	-0.467301	0.0955145	-4.0344	5.47421e-05	0.0669842
FNBP4	1003.25	-0.216897	-0.227878	0.0537257	-4.03712	5.41116e-05	0.0669842
IGF2R	533.314	0.352735	0.41159	0.0876823	4.02288	5.74916e-05	0.0669842
TMEM70	542.681	-0.368206	-0.443132	0.094136	-3.91142	9.17535e-05	0.0988083
C16orf54	2452.95	0.347861	0.409538	0.0895833	3.8831	0.000103133	0.103963
GRAMD1C	8.30069	0.418726	1.9496	0.108099	3.87354	0.000107267	0.103963
NIPSNAP3A	1155.04	-0.253948	-0.274496	0.0660327	-3.84579	0.000120166	0.110919
CEP85L	802.889	-0.358094	-0.433178	0.0950634	-3.76689	0.000165291	0.134346
GADD45G	41.0745	-0.467372	-0.981436	0.125198	-3.73306	0.000189168	0.134346
INPP4B	11.0404	0.462651	1.18041	0.12328	3.75286	0.000174829	0.134346
NIP7	226.821	0.379571	0.476165	0.100668	3.77052	0.000162906	0.134346
RP11-254F19.3	15.6879	0.402648	0.533754	0.107617	3.74149	0.00018293	0.134346
TUBB6	203.443	0.458625	0.776756	0.123067	3.72662	0.000194062	0.134346
XX-FW83563B9.5	43.7249	-0.399682	-0.52366	0.106794	-3.74255	0.000182162	0.134346
SLC12A8	16.3792	-0.459368	-0.79438	0.123991	-3.70485	0.000211516	0.14138
MIR24-2	474.519	0.462172	0.893769	0.125241	3.69028	0.000224011	0.144741
IL10RA	4546.61	-0.304838	-0.348711	0.083255	-3.66149	0.000250748	0.147288
MCCC1	365.961	-0.367077	-0.458171	0.100247	-3.66171	0.000250536	0.147288
TLN1	3844.12	0.199234	0.209552	0.0542494	3.67256	0.000240132	0.147288
LPCAT4	118.415	0.389884	0.512757	0.106827	3.64968	0.000262563	0.149692
IFIT1	401.18	-0.455556	-0.960739	0.125163	-3.63972	0.000272938	0.151161
KRASP1	5.51552	0.448898	0.781562	0.123647	3.63047	0.000282903	0.152328
ADAMTS2	53.1562	0.307981	3.42731	0.0850934	3.61933	0.00029537	0.154742
AHR	607.084	0.371522	0.476626	0.103782	3.57982	0.000343825	0.175387
PTAFR	6344.29	0.269402	0.299756	0.0756069	3.56319	0.000366379	0.181396
ZNF333	484.705	-0.286357	-0.32408	0.0804927	-3.55756	0.00037432	0.181396
AC098823.3	27.8087	0.371854	0.484559	0.105673	3.51891	0.000433319	0.201757
FAM234A	378.997	0.257881	0.284922	0.0734637	3.51032	0.000447564	0.201757
RP11-1046B16.3	14.7723	-0.436692	-0.999041	0.124258	-3.51439	0.000440765	0.201757
CTC-429P9.1	41.8384	-0.40724	-0.600593	0.117367	-3.46982	0.000520816	0.224857
DNAJB9	594.789	-0.391001	-0.542439	0.112706	-3.4692	0.000522005	0.224857
RN7SL368P	36.3454	-0.419357	-1.10804	0.121322	-3.45657	0.000547093	0.23054
FOSL2	1102.92	-0.276298	-0.312319	0.0801723	-3.4463	0.000568311	0.231263
RNF114	1341.41	-0.182805	-0.191816	0.0530757	-3.44424	0.000572668	0.231263
TIPARP	283.136	0.413119	0.654411	0.12073	3.42185	0.000621969	0.246046
APEX1	729.78	-0.228683	-0.247816	0.0669746	-3.41448	0.000639044	0.246562
SPATA2L	225.023	0.333358	0.410318	0.097748	3.41038	0.000648714	0.246562
PYCARD-AS1	25.0311	0.393482	0.572719	0.115956	3.39337	0.000690384	0.257354
AC004893.11	43.8912	-0.381166	-0.533368	0.11345	-3.35977	0.000780076	0.266584
FBXL14	31.5003	-0.416875	-0.963609	0.124087	-3.35952	0.000780767	0.266584
KANTR	20.9238	0.359113	0.473708	0.107083	3.35361	0.000797661	0.266584
LINC00674	108.14	0.31563	0.379701	0.0937756	3.3658	0.000763207	0.266584
WDR75	181.769	-0.398756	-0.6023	0.11884	-3.35541	0.000792478	0.266584
ZNF233	10.7957	-0.419371	-0.928973	0.124692	-3.36326	0.000770275	0.266584
RP11-166N6.2	13.9797	0.415748	0.995394	0.124178	3.34799	0.000813989	0.26743
DDX58	580.284	-0.354541	-0.462123	0.106165	-3.33952	0.000839243	0.269773
DKC1	519.92	-0.264611	-0.29928	0.0803298	-3.29406	0.000987504	0.269773
GIGYF1	309.583	0.198949	0.211834	0.0599139	3.32058	0.000898298	0.269773
HIST2H2BE	395.195	-0.383223	-0.557139	0.116418	-3.29179	0.000995529	0.269773
OR2A1-AS1	21.365	0.309616	0.370982	0.0930561	3.3272	0.000877243	0.269773
PLK3	490.083	0.39629	0.61058	0.119435	3.31805	0.000906489	0.269773
RHOB	576.33	-0.411569	-0.763962	0.125099	-3.28995	0.00100204	0.269773
RP11-325I22.3	5.90328	-0.340513	-1.59047	0.102555	-3.32031	0.000899189	0.269773
RP11-796E2.4	64.9242	-0.402827	-0.649049	0.121876	-3.30522	0.000949029	0.269773
RP11-823E8.3	71.1827	0.385545	0.564753	0.116484	3.30987	0.0009334	0.269773
SON	5089.32	0.143328	0.147925	0.0435161	3.29367	0.000988882	0.269773
TBC1D7	282.682	0.333244	0.417879	0.100625	3.31175	0.000927138	0.269773
TMEM123	4308.3	-0.246216	-0.272948	0.0745918	-3.30085	0.000963931	0.269773
TNFRSF12A	60.8413	0.410694	0.873743	0.125295	3.27781	0.00104617	0.277794
LILRB1	2560.37	-0.193164	-0.205241	0.0590383	-3.27185	0.00106846	0.279879
RP1-197B17.3	11.8888	0.395722	1.11343	0.121139	3.26668	0.00108816	0.281238
SDHD	2737.48	-0.162568	-0.169553	0.0498506	-3.26111	0.00110976	0.283048
RUNDC3A-AS1	37.1782	0.263481	0.299238	0.0812494	3.24286	0.00118335	0.294079
SMAD9	16.9075	-0.393422	-0.625128	0.121302	-3.24334	0.00118137	0.294079
IFIT3	870.629	-0.405199	-0.759244	0.125181	-3.2369	0.00120834	0.296487
MIEN1	981.837	0.208569	0.224695	0.0647063	3.22332	0.00126713	0.307026
ENO1-IT1	20.9801	0.365772	0.519612	0.114169	3.20378	0.00135636	0.324589
AC009022.1	15.3181	0.379126	0.577541	0.118829	3.19053	0.00142012	0.335703
HINFP	268.353	-0.318704	-0.397514	0.100128	-3.18295	0.00145781	0.336407
RP11-365P13.5	43.1527	-0.399139	-0.817688	0.125336	-3.18456	0.00144974	0.336407
AC012314.19	18.7467	-0.391102	-0.703066	0.124691	-3.13658	0.00170932	0.354138
CDH6	4.76857	-0.389209	-0.686808	0.124329	-3.13049	0.00174517	0.354138
L3HYPDH	126.707	-0.34073	-0.453027	0.108454	-3.1417	0.0016797	0.354138
LFNG	116.115	0.387582	0.670639	0.123672	3.13395	0.00172471	0.354138
2018-03-03	19.0039	0.353923	1.33985	0.112942	3.13368	0.00172627	0.354138
MPDU1	686.616	-0.207544	-0.224244	0.0658732	-3.15066	0.00162902	0.354138
OGG1	327.49	-0.309895	-0.383486	0.0988855	-3.13387	0.00172515	0.354138
PRKAA1	580.529	-0.256197	-0.291492	0.0818775	-3.12902	0.00175388	0.354138
RASGEF1B	954.302	0.372489	0.561346	0.118254	3.14991	0.00163318	0.354138
RP11-162G10.5	13.0041	-0.310655	-1.60256	0.0988048	-3.14413	0.00166582	0.354138
RP11-280K24.4	4.68376	0.388295	0.973532	0.123487	3.14443	0.00166413	0.354138
SPACA9	27.2015	-0.383558	-0.626771	0.122397	-3.13373	0.00172598	0.354138
C14orf79	23.6046	0.388164	0.894806	0.124627	3.11461	0.00184189	0.354798
PPBP	79.9644	0.314272	1.75621	0.100895	3.11484	0.00184048	0.354798
RP11-425D10.10	28.5541	-0.388783	-0.707592	0.124869	-3.11353	0.00184867	0.354798
USP13	38.4762	0.391701	0.778725	0.125374	3.12427	0.00178247	0.354798
ZNF420	69.3733	-0.387374	-0.884092	0.124282	-3.1169	0.00182762	0.354798
EML3	484.345	0.257994	0.295033	0.0830273	3.10733	0.00188783	0.358761
ELP3	366.923	-0.280325	-0.331342	0.0906077	-3.09383	0.00197589	0.364768
PLEKHA3	401.298	0.276852	0.325625	0.0893998	3.09678	0.00195633	0.364768
SLC38A1	53.0588	0.377544	1.01877	0.121961	3.0956	0.00196412	0.364768
C2orf68	1334.87	0.202287	0.21845	0.065623	3.08256	0.00205229	0.375299
CCL5	49.4038	0.383575	0.741803	0.125258	3.06229	0.00219652	0.381001
EYS	6.42276	-0.367577	-1.04106	0.119676	-3.07143	0.00213036	0.381001
OLFML2A	21.9358	0.345355	0.48228	0.112801	3.06162	0.00220141	0.381001
RP11-486A14.1	10.2548	0.33484	0.450866	0.10935	3.06211	0.00219785	0.381001
SLC31A2	3235.22	0.308542	0.387014	0.100689	3.0643	0.00218178	0.381001
SOX4	649.055	-0.306958	-0.382585	0.100011	-3.06925	0.00214599	0.381001
KLF2	334.414	0.365193	0.563193	0.119507	3.05581	0.0022445	0.38153
MIR3945	12.4799	-0.364735	-1.034	0.119502	-3.05212	0.00227234	0.38153
PSMA4	2414.32	-0.195505	-0.210257	0.0640856	-3.05069	0.0022832	0.38153
RP11-284A20.3	6.14167	0.369157	0.588937	0.120975	3.05152	0.00227686	0.38153
CTA-384D8.34	14.3593	-0.377515	-0.667958	0.124443	-3.03364	0.0024162	0.38379
CYP3A5	11.9098	0.338832	1.33528	0.111652	3.03471	0.00240765	0.38379
PSTPIP2	865.894	-0.224202	-0.24778	0.0736348	-3.04479	0.00232846	0.38379
RAB1A	1533.61	0.199611	0.21561	0.0657082	3.03785	0.00238275	0.38379
RNF217-AS1	13.2293	-0.371266	-0.936506	0.122474	-3.0314	0.00243422	0.38379
RP11-463O12.5	270.382	0.28269	0.339052	0.0932582	3.03126	0.00243532	0.38379
SMS	946.766	-0.198222	-0.213881	0.0653553	-3.03299	0.00242143	0.38379
FABP5P1	5.51538	-0.374723	-0.654043	0.124143	-3.01848	0.00254044	0.396013
ORC4	809.094	-0.193467	-0.20809	0.0641276	-3.0169	0.00255373	0.396013
RASSF3	2960.59	0.296168	0.365997	0.0984133	3.00943	0.00261737	0.400065
WASF2	4199.93	0.167645	0.176857	0.0557146	3.00899	0.00262114	0.400065
AC005593.2	12.6434	-0.354452	-1.05532	0.118044	-3.00271	0.00267588	0.405229
MT-TD	20.0861	0.345896	0.500807	0.115701	2.98955	0.00279384	0.416053
RAB3A	34.0062	-0.373476	-0.813272	0.124893	-2.99037	0.00278638	0.416053
RP11-173D3.4	6.85712	0.329972	1.35848	0.110447	2.9876	0.00281175	0.416053
CDC73	969.582	-0.247501	-0.282879	0.0830223	-2.98114	0.00287176	0.418991
TWSG1	177.397	-0.343389	-0.491147	0.1152	-2.98081	0.00287483	0.418991
LPCAT2	985.803	-0.208777	-0.228396	0.0703105	-2.96936	0.00298422	0.431687
ADPGK	2900.6	-0.178948	-0.190776	0.0604988	-2.95788	0.00309767	0.43182
ASCC3	379.81	-0.283716	-0.344972	0.0959534	-2.95681	0.0031084	0.43182
IFIT2	1515.27	-0.369252	-0.68038	0.125019	-2.95357	0.00314119	0.43182
NUAK2	1037.09	-0.311673	-0.403905	0.105426	-2.95631	0.00311345	0.43182
RAB24	2549.61	-0.15828	-0.16624	0.0535622	-2.95507	0.00312602	0.43182
SP100	2906.35	-0.166096	-0.175364	0.0561266	-2.9593	0.00308338	0.43182
STAU1	978.868	-0.176979	-0.188347	0.0597433	-2.96233	0.00305324	0.43182
TCTEX1D2	12.6442	0.368506	0.682357	0.124858	2.9514	0.00316336	0.43182
RDH14	159.846	-0.29521	-0.36835	0.100167	-2.94716	0.00320703	0.434721
RP11-304F15.4	5.17763	0.363759	0.628252	0.123565	2.94386	0.00324147	0.436338
PDE6A	46.4891	0.264029	0.311272	0.089863	2.93813	0.00330198	0.438395
RP11-807C20.2	23.7546	0.368469	0.733924	0.125378	2.93886	0.00329421	0.438395
XPC	482.187	-0.242042	-0.275991	0.0824427	-2.93589	0.00332596	0.438574
RP11-16E23.4	230.297	0.319454	0.427958	0.108912	2.93314	0.00335554	0.439092
ZNF969P	49.1103	-0.303203	-0.387041	0.103435	-2.93133	0.00337519	0.439092
SHOX	48.4976	0.22256	0.247982	0.0759864	2.92895	0.00340107	0.439509
BEST1	1725.07	-0.319113	-0.426768	0.109087	-2.9253	0.00344125	0.440188
RP11-461F11.2	35.4751	0.26864	0.319813	0.091863	2.92435	0.00345174	0.440188
GMPS	600.813	-0.218927	-0.243081	0.0750668	-2.91644	0.00354056	0.441284
RP11-854K16.4	5.86169	0.319153	1.35511	0.10934	2.91891	0.00351262	0.441284
SFXN3	1007.34	0.214276	0.23677	0.0734961	2.91548	0.0035514	0.441284
TXNIP	10079	-0.233053	-0.263197	0.0799241	-2.91593	0.00354635	0.441284
DYNC1LI1	899.812	-0.196801	-0.213683	0.0676814	-2.90775	0.00364037	0.449458
ZC3H15	1354.81	-0.182038	-0.195078	0.062654	-2.90544	0.00366731	0.449919
AC008810.1	14.7374	0.335017	0.483421	0.115411	2.90281	0.00369829	0.450866
MAFB	2884.53	0.313283	0.416631	0.108137	2.8971	0.00376627	0.456284
LA16c-390H2.4	27.8373	0.24639	0.28456	0.0853504	2.88681	0.00389169	0.465658
PIGS	1872.07	-0.141688	-0.147564	0.0490486	-2.88873	0.00386806	0.465658
AC142119.1	8.23736	0.348492	0.557549	0.121035	2.87927	0.00398594	0.471213
OTUD7B	21.2216	0.29614	0.377183	0.102855	2.87921	0.00398674	0.471213
DDA1	304.25	0.216447	0.240638	0.0753578	2.87225	0.00407561	0.473923
NDUFB5	1185.49	-0.173832	-0.185359	0.0605914	-2.86892	0.00411871	0.473923
RP11-403I13.5	19.7569	0.335761	0.494818	0.116848	2.87349	0.00405968	0.473923
RP11-517I3.2	17.0896	0.287401	0.359478	0.100149	2.86975	0.00410793	0.473923
RP11-57A19.2	21.5407	0.255778	0.300613	0.0891861	2.86791	0.00413191	0.473923
ABI3	1056.59	-0.228494	-0.257866	0.0797368	-2.8656	0.00416221	0.47459
COL4A3BP	1147.01	0.168129	0.178639	0.0589933	2.84997	0.00437235	0.480261
DDX27	634.482	-0.176961	-0.189384	0.0621129	-2.84902	0.00438538	0.480261
NAA15	430.014	-0.241672	-0.27826	0.08482	-2.84924	0.00438242	0.480261
PPA1	987.763	-0.27098	-0.327701	0.0949845	-2.85288	0.00433243	0.480261
RNU12	46.662	-0.352792	-0.82956	0.123809	-2.84948	0.0043791	0.480261
RP11-156K23.3	72.7009	-0.351498	-0.587596	0.123092	-2.85557	0.004296	0.480261
RP3-402G11.26	22.3687	-0.355946	-0.640819	0.124713	-2.85413	0.00431545	0.480261
GPATCH1	129.591	-0.344806	-0.549181	0.121399	-2.84026	0.00450764	0.488135
RETN	280.184	0.353246	0.630123	0.124324	2.84134	0.00449245	0.488135
MX1	1702.91	-0.353418	-0.641183	0.124829	-2.83123	0.00463692	0.496586
RP1-197B17.7	12.4115	0.312082	1.28276	0.110166	2.83284	0.00461367	0.496586
AC005154.7	6.09164	-0.32123	-1.05131	0.1151	-2.79087	0.00525669	0.518488
AC017002.2	7.34541	0.31085	1.19727	0.112149	2.77177	0.00557525	0.518488
CLEC12A	5044.69	-0.28889	-0.368744	0.103438	-2.79288	0.00522413	0.518488
CLK4	481.802	-0.273077	-0.337188	0.098522	-2.77173	0.00557588	0.518488
CNOT10	525.83	-0.226919	-0.258285	0.0819773	-2.76807	0.00563886	0.518488
CTB-131B5.2	77.9053	0.289874	0.371123	0.103549	2.79937	0.00512019	0.518488
CUL1	1024.97	-0.240223	-0.278949	0.0867925	-2.76778	0.00564388	0.518488
E2F3	411.41	-0.2513	-0.296526	0.0902544	-2.78435	0.00536343	0.518488
FAM204A	1141.55	-0.164411	-0.174754	0.0591985	-2.77728	0.00548152	0.518488
FOXD2-AS1	18.5225	0.282605	1.50855	0.101633	2.78064	0.00542524	0.518488
GFI1B	9.95445	0.349924	0.664225	0.125114	2.79684	0.00516052	0.518488
IL1RAP	345.862	0.311683	0.429025	0.111605	2.79273	0.00522653	0.518488
LGALS9C	98.8681	-0.164864	-0.175284	0.0593382	-2.77838	0.005463	0.518488
MX2	1302.29	-0.272989	-0.33687	0.0984292	-2.77346	0.00554639	0.518488
ORC5	214.673	-0.312649	-0.426784	0.111174	-2.81224	0.0049198	0.518488
PRRC2B	377.906	0.231131	0.264031	0.0827712	2.7924	0.00523183	0.518488
RNASE1	93.809	0.337955	0.930077	0.121402	2.78376	0.00537322	0.518488
RNU5D-1	9.17389	-0.341139	-0.88075	0.121873	-2.79914	0.00512386	0.518488
RP11-123C21.2	60.1456	0.348454	0.62184	0.124321	2.80285	0.00506525	0.518488
RP11-373D23.2	22.3893	-0.352058	-0.749167	0.125104	-2.81412	0.0048911	0.518488
RP11-447D11.3	7.77572	-0.322571	-1.05905	0.114908	-2.8072	0.00499744	0.518488
RP11-83B20.1	8.77336	0.347987	0.666882	0.12518	2.7799	0.0054375	0.518488
RPS6KA1	3327.37	-0.197915	-0.216576	0.0704099	-2.81089	0.00494044	0.518488
SERINC5	732.955	0.26545	0.322391	0.0955363	2.77853	0.00546057	0.518488
SLC4A1	29.7591	0.325068	0.476388	0.116532	2.78953	0.0052785	0.518488
THEMIS2	5641.02	-0.183741	-0.198785	0.066359	-2.76889	0.0056247	0.518488
WDR74	256.761	-0.235622	-0.270751	0.0843439	-2.79359	0.00521273	0.518488
ZCCHC10	484.234	-0.241917	-0.28097	0.086833	-2.786	0.0053363	0.518488
ZNF143	654.985	-0.230085	-0.263008	0.0830569	-2.77021	0.005602	0.518488
ZNF22	192.771	-0.295534	-0.385004	0.106069	-2.78625	0.0053322	0.518488
APEH	1433	0.155121	0.163968	0.0566522	2.73812	0.0061791	0.524358
CCDC186	311.532	0.275969	0.345243	0.100302	2.75139	0.00593438	0.524358
CDK11A	12.2041	0.328128	0.511628	0.120043	2.73341	0.00626814	0.524358
CTD-2562J15.4	10.717	0.332453	0.52456	0.120523	2.75843	0.00580794	0.524358
LAMB4	20.0222	0.273501	0.340572	0.0996072	2.74579	0.00603653	0.524358
NKRF	50.0027	-0.335358	-0.548932	0.122409	-2.73965	0.00615038	0.524358
OSM	243.187	-0.296539	-1.18139	0.108152	-2.74188	0.00610883	0.524358
PHF7	62.5672	0.341856	0.607735	0.124266	2.751	0.0059414	0.524358
PPIAL4C	28.5646	-0.257378	-0.309704	0.0940686	-2.73607	0.00621775	0.524358
PTGES	11.7252	0.325368	1.02472	0.118067	2.7558	0.00585494	0.524358
RGCC	170.508	0.325864	0.993854	0.118844	2.74195	0.00610757	0.524358
RP1-67K17.4	11.5681	0.307193	0.422118	0.111291	2.76026	0.00577554	0.524358
RP11-109N23.5	9.02785	-0.329971	-0.929949	0.119675	-2.75722	0.00582944	0.524358
RP11-483P21.2	14.8714	0.342876	0.630623	0.124791	2.74759	0.00600347	0.524358
RP11-81A1.6	181.069	0.28335	0.362765	0.103563	2.73602	0.00621871	0.524358
RP11-849H4.2	13.7456	0.342873	0.761566	0.124976	2.74351	0.00607859	0.524358
SOWAHC	99.8637	0.345116	0.683607	0.12537	2.75278	0.00590922	0.524358
TBC1D3D	11.2041	-0.329243	-0.512757	0.120385	-2.73492	0.00623948	0.524358
U4	23.4322	-0.319463	-0.468243	0.116891	-2.73301	0.00627584	0.524358
ZNF398	137.095	-0.345409	-0.654089	0.125251	-2.75774	0.0058203	0.524358
ZNF563	21.8971	-0.309306	-1.07459	0.11299	-2.73748	0.00619128	0.524358
AC002398.13	5.96796	0.341874	0.693487	0.125401	2.72625	0.00640584	0.531033
ASGR2	1469.28	0.251848	0.30065	0.092387	2.72601	0.00641053	0.531033
EEF1E1	120.778	-0.275179	-0.345655	0.101151	-2.72048	0.00651873	0.53542
TNF	266.111	0.340647	0.64771	0.125154	2.72184	0.00649204	0.53542
RP11-810P12.7	427.771	-0.332737	-0.544895	0.122439	-2.71758	0.00657621	0.537862
SP110	114.474	-0.20792	-0.232152	0.0767139	-2.71033	0.00672168	0.54745
ADAMTSL2	9.27888	0.324324	0.503896	0.119855	2.70597	0.00681048	0.550059
SLC25A30	60.6524	-0.338785	-0.71687	0.125153	-2.70698	0.00678994	0.550059
C9orf172	19.1149	-0.329359	-0.532055	0.121959	-2.70056	0.00692221	0.550383
DPH7	372.877	-0.234003	-0.271566	0.0866586	-2.70028	0.00692805	0.550383
FHDC1	20.6395	0.299531	0.409194	0.110865	2.70175	0.00689749	0.550383
RP11-96K19.4	32.9786	0.319315	0.480804	0.118218	2.70107	0.00691163	0.550383
EIF5AP4	141.778	-0.263642	-0.323963	0.0977163	-2.69804	0.00697495	0.551847
UGCG	162.742	0.306942	0.433872	0.113895	2.69497	0.00703955	0.554694
PPOX	229.221	-0.266333	-0.330008	0.0990914	-2.68775	0.00719363	0.562263
RASA4DP	71.8753	-0.299146	-0.408753	0.111274	-2.68838	0.00717991	0.562263
ATF4P4	62.4097	0.241744	0.285438	0.0901825	2.68061	0.00734875	0.563589
CERKL	567.195	-0.235227	-0.274448	0.0878484	-2.67765	0.00741412	0.563589
EIF4BP2	5.61273	0.335414	0.645737	0.125218	2.67865	0.00739203	0.563589
RP11-297C4.2	13.5536	0.333775	0.60433	0.124577	2.67927	0.0073782	0.563589
RP11-536I6.2	10.207	0.335568	0.647307	0.125248	2.67923	0.00737908	0.563589
RP11-680B3.2	27.8698	0.234583	0.27351	0.0875052	2.68079	0.00734494	0.563589
SPAG1	32.9593	0.332564	0.802918	0.123915	2.6838	0.00727898	0.563589
CNBP	10262.4	-0.112297	-0.115631	0.0419764	-2.67523	0.00746777	0.564637
CRIP1	295.029	0.297194	0.406911	0.111125	2.67441	0.00748616	0.564637
FOSL1	60.7547	0.283208	1.30141	0.106302	2.6642	0.00771725	0.57535
NUP210	588.984	0.220753	0.252237	0.0828402	2.66481	0.00770315	0.57535
PLSCR2	14.4919	-0.331479	-0.750948	0.124415	-2.66431	0.00771472	0.57535
RNU6-1188P	5.68349	0.333516	0.668458	0.125387	2.6599	0.0078164	0.58051
BCL7A	21.6351	-0.332128	-0.708252	0.125095	-2.655	0.00793076	0.581753
CEP83	190.331	-0.282248	-0.368775	0.106408	-2.6525	0.00798988	0.581753
DDX18P1	4.64953	0.283909	1.28151	0.106998	2.6534	0.00796846	0.581753
MAN2B2	582.111	-0.215977	-0.245219	0.0813304	-2.65555	0.00791796	0.581753
TES	2552.25	-0.195755	-0.216363	0.073659	-2.65759	0.00787017	0.581753
YTHDC1	376.752	0.191959	0.211374	0.0723959	2.65151	0.00801322	0.581753
CCDC82	364.695	-0.277578	-0.357847	0.10474	-2.65017	0.00804504	0.581884
FOXP1	1274.39	-0.160813	-0.171583	0.0608455	-2.64297	0.00821827	0.583686
ITGB2-AS1	1034.85	-0.255338	-0.311568	0.0965512	-2.64459	0.00817898	0.583686
PARP14	2102.63	-0.249716	-0.301003	0.0943871	-2.64565	0.00815333	0.583686
PLA2G12A	144.422	0.30524	0.441186	0.115603	2.6404	0.00828073	0.583686
RNASE6	2290.92	0.195213	0.215914	0.0738075	2.64489	0.00817174	0.583686
RP11-313D6.3	10.841	0.323457	0.536089	0.122468	2.64115	0.00826263	0.583686
WIPF2	343.666	0.22659	0.262091	0.0857496	2.64246	0.00823072	0.583686
AC091492.2	31.8613	0.247329	0.297986	0.0940527	2.62968	0.00854648	0.585389
ALDH1L2	14.637	-0.326784	-0.76358	0.123952	-2.63638	0.0083795	0.585389
KLHDC10	103.15	-0.321708	-0.521412	0.122058	-2.63569	0.00839674	0.585389
PER3	64.1442	-0.325418	-0.769354	0.123724	-2.63018	0.0085339	0.585389
PPRC1	311.513	0.272006	0.347638	0.103339	2.63218	0.00848392	0.585389
PTGIR	434.663	-0.266652	-0.334865	0.101125	-2.63685	0.0083679	0.585389
RP5-858L17.1	9.85336	0.322329	0.842883	0.122503	2.63119	0.00850868	0.585389
SLBP	1417.59	-0.145765	-0.153671	0.0554125	-2.63054	0.00852481	0.585389
AC093673.5	466.937	0.238994	0.28321	0.0909431	2.62795	0.00859018	0.58631
KIAA1586	178.107	-0.275145	-0.354866	0.104799	-2.62545	0.0086535	0.586501
PNPT1P1	4.91331	-0.273114	-1.22066	0.103979	-2.62663	0.00862353	0.586501
GAPDHP60	5.56946	0.310326	0.963335	0.118462	2.61963	0.0088024	0.592372
PARP9	1704.31	-0.278562	-0.363597	0.106299	-2.62055	0.00877882	0.592372
RNU5A-1	5.08328	-0.306234	-0.943293	0.117001	-2.61737	0.00886113	0.592372
SAFB	931.164	-0.190016	-0.209319	0.0725996	-2.61732	0.00886236	0.592372
GSG2	5.35999	-0.271768	-1.21552	0.10392	-2.61517	0.00891842	0.594071
RP11-164H13.1	13.3665	0.285685	0.384185	0.109347	2.61264	0.00898458	0.596428
ARL4A	1098.31	0.325527	0.629273	0.125272	2.59856	0.0093615	0.600671
ATP5HP4	41.4056	0.249577	0.30351	0.0957362	2.60693	0.00913588	0.600671
CCNT2	729.769	-0.219757	-0.252903	0.0847003	-2.59453	0.0094721	0.600671
CTD-3075F15.1	8.30512	-0.272089	-1.1843	0.104907	-2.59362	0.00949716	0.600671
EXOSC8	446.5	-0.181229	-0.197829	0.0695628	-2.60526	0.00918037	0.600671
GP1BB	7.27632	0.245335	1.62301	0.0946037	2.59329	0.00950616	0.600671
ISG15	1054.52	-0.301579	-0.436571	0.116076	-2.59812	0.00937367	0.600671
NCBP1	573.567	-0.23292	-0.274379	0.0898987	-2.59091	0.00957217	0.600671
ORC2	173.142	-0.282561	-0.377852	0.109063	-2.5908	0.00957529	0.600671
RP11-730G20.2	55.6767	0.217599	0.249432	0.083603	2.60277	0.0092475	0.600671
SNX18	903.116	-0.255646	-0.315123	0.0982472	-2.60207	0.00926636	0.600671
STK35	165.029	0.303533	0.445494	0.116658	2.60191	0.00927075	0.600671
TBC1D10A	181.746	-0.235411	-0.278052	0.0904469	-2.60276	0.00924769	0.600671
TNFRSF10D	275.895	0.291504	0.404805	0.112411	2.59318	0.00950922	0.600671
UBBP1	144.392	0.12772	0.133037	0.0491413	2.59903	0.00934886	0.600671
YKT6	366.981	0.22441	0.260067	0.0861948	2.60352	0.00922722	0.600671
ZNF703	126.915	-0.297851	-0.424639	0.114928	-2.59164	0.00955187	0.600671
BUD31	735.869	0.141339	0.148763	0.054609	2.58819	0.00964805	0.602204
RP11-638I2.2	10.1905	-0.323319	-0.592692	0.124945	-2.5877	0.00966186	0.602204
ACTG1P17	12.3146	0.288266	0.396824	0.11155	2.58418	0.00976097	0.602569
LIPT1	104.83	-0.316317	-0.517247	0.122376	-2.5848	0.00974368	0.602569
RP11-358L22.3	24.7198	-0.307102	-0.463976	0.118789	-2.58528	0.0097301	0.602569
PDE4B	415.476	-0.321596	-0.574479	0.124592	-2.5812	0.00984574	0.605873
SNHG9	69.4048	0.241032	0.289585	0.0935937	2.5753	0.0100152	0.614353
CBL	539.781	0.239411	0.286722	0.0930102	2.57403	0.0100521	0.614667
MLLT6	123.587	0.271533	0.353336	0.105616	2.57095	0.0101421	0.618118
NFXL1	322.055	-0.317672	-0.541229	0.123612	-2.56992	0.0101723	0.618118
MAX	794.565	-0.165822	-0.17855	0.0645538	-2.56874	0.010207	0.618289
ALDH7A1	5.08502	-0.26967	-1.17081	0.105074	-2.56648	0.0102737	0.620393
LAP3	3176.42	-0.2764	-0.365387	0.107788	-2.5643	0.0103383	0.622354
C17orf49	26.7682	0.238256	0.285242	0.0929766	2.56253	0.0103911	0.623343
RP11-445N18.7	7.2573	0.304762	0.465906	0.119023	2.56053	0.0104512	0.623343
RP11-802O23.3	6.37914	-0.32096	-0.618106	0.125325	-2.56101	0.0104368	0.623343
AKT1S1	171.724	0.213778	0.245169	0.0837217	2.55344	0.0106665	0.623577
ANXA1	20357.2	0.198121	0.221996	0.0776561	2.55126	0.0107333	0.623577
EEFSEC	368.244	-0.214259	-0.24574	0.083874	-2.55454	0.0106329	0.623577
EIF5A	3073.28	-0.204875	-0.231675	0.0802649	-2.55249	0.0106957	0.623577
EPRS	936.997	-0.198395	-0.22222	0.0776365	-2.55544	0.0106055	0.623577
RASA4CP	120.18	-0.268678	-0.347474	0.105162	-2.55489	0.0106223	0.623577
RP11-604N13.1	14.2527	0.277783	0.371179	0.108603	2.55779	0.0105338	0.623577
RP11-792A8.4	4.48399	-0.306655	-0.846208	0.120215	-2.55089	0.0107447	0.623577
STAT5B	899.005	-0.19203	-0.213274	0.075149	-2.55532	0.0106089	0.623577
CD38	127.892	-0.317984	-0.573581	0.124741	-2.54915	0.0107987	0.624843
PIGN	335.086	0.280651	0.380677	0.11022	2.54628	0.0108879	0.628126
AGO3	492.016	0.182318	0.200512	0.0720049	2.53202	0.0113408	0.629383
ANXA4	881.217	-0.188397	-0.208771	0.0744632	-2.53007	0.0114039	0.629383
ASNA1	612.433	0.14869	0.157841	0.058601	2.53732	0.0111704	0.629383
C4orf33	447.294	-0.277823	-0.374206	0.109817	-2.52986	0.0114108	0.629383
CTA-305I2.1	17.6572	0.315433	0.725232	0.12458	2.53196	0.0113427	0.629383
FAM46A	986.867	-0.187376	-0.207327	0.0739959	-2.53225	0.0113334	0.629383
HYAL4	8.40806	0.313303	0.737983	0.124293	2.52068	0.0117128	0.629383
ITPRIPL1	11.324	-0.316707	-0.613204	0.125346	-2.52666	0.0115152	0.629383
KLHL25	5.32046	-0.182141	-2.04996	0.0721066	-2.52599	0.0115372	0.629383
MMD	124.634	0.290995	0.418071	0.115174	2.52658	0.0115181	0.629383
PEBP1P3	29.5122	0.31483	0.578161	0.124782	2.52305	0.0116341	0.629383
PHYH	305.261	0.234532	0.280785	0.0929399	2.52348	0.0116199	0.629383
PIM1	986.636	0.306609	0.492777	0.121409	2.52541	0.0115563	0.629383
PLAGL1	441.98	-0.239145	-0.289016	0.0948551	-2.52117	0.0116967	0.629383
RASA4	354.121	-0.286064	-0.396778	0.112645	-2.53952	0.0111005	0.629383
RP11-34F20.7	27.8901	-0.308131	-0.800737	0.121745	-2.53095	0.0113753	0.629383
RP11-4B16.4	205.546	-0.25738	-0.324004	0.101481	-2.53624	0.0112051	0.629383
RP3-467N11.2	50.4457	0.214516	0.246843	0.0844909	2.53893	0.0111194	0.629383
RPL7P26	42.7177	0.214395	0.24668	0.084509	2.53695	0.0111824	0.629383
RTCB	1633.75	-0.141806	-0.149603	0.0557549	-2.54339	0.0109783	0.629383
SARS2	11.7925	-0.302951	-0.470597	0.120198	-2.52042	0.0117214	0.629383
SPG21	4616.06	-0.110542	-0.114094	0.0435596	-2.53773	0.0111575	0.629383
TBC1D3L	18.8739	-0.308948	-0.506481	0.12247	-2.52265	0.0116475	0.629383
TPMTP1	12.7996	-0.311954	-0.528626	0.123472	-2.52652	0.01152	0.629383
VBP1	537.183	-0.19474	-0.217732	0.0771206	-2.52514	0.0115653	0.629383
CTD-2003C8.2	9.45355	0.305005	0.488144	0.121206	2.51643	0.0118551	0.629986
ELMSAN1	905.216	0.229915	0.27302	0.091363	2.5165	0.0118528	0.629986
PRKRIP1	219.546	-0.182762	-0.201408	0.0727172	-2.51332	0.0119601	0.629986
RP11-412B14.2	7.3299	-0.296484	-0.440947	0.117886	-2.515	0.0119034	0.629986
RP11-481J2.2	7.50664	0.305873	0.496054	0.121686	2.51361	0.0119501	0.629986
TUBB1	36.5105	0.238264	1.55606	0.0946414	2.51754	0.0118176	0.629986
ZNF212	97.6467	-0.301309	-0.46412	0.119848	-2.51408	0.0119343	0.629986
ATP10D	350.602	-0.257087	-0.326359	0.102669	-2.50404	0.0122786	0.632898
DYNC2LI1	87.8966	0.277429	0.377405	0.110505	2.51055	0.0120542	0.632898
MIR324	7.775	0.313705	0.662721	0.125324	2.50315	0.0123093	0.632898
RP11-115H15.2	16.3031	0.314147	0.640362	0.125398	2.50519	0.0122385	0.632898
RP11-419L20.2	8.56246	0.314135	0.655334	0.12535	2.50605	0.0122087	0.632898
RP11-575L7.8	24.8527	-0.279467	-0.382908	0.111445	-2.50766	0.0121533	0.632898
RP3-329A5.8	8.95845	-0.300614	-0.831799	0.120078	-2.5035	0.0122972	0.632898
RP3-469D22.1	89.3199	-0.149427	-0.159001	0.0596864	-2.50354	0.0122956	0.632898
SDHDP6	97.8057	-0.149462	-0.159022	0.0596285	-2.50655	0.0121916	0.632898
RP11-344B5.2	24.1033	0.297692	0.454321	0.119029	2.50101	0.0123839	0.635051
AP003774.4	96.8905	-0.305176	-0.499769	0.122427	-2.49272	0.0126767	0.635916
BX255923.2	62.986	-0.204015	-0.232347	0.0821102	-2.48465	0.012968	0.635916
CA5BP1	299.469	0.16611	0.179852	0.0665869	2.49464	0.0126085	0.635916
CD302	1158.79	-0.18458	-0.204459	0.0743341	-2.48311	0.0130241	0.635916
DCAF17	158.786	-0.30852	-0.527629	0.123703	-2.49404	0.0126298	0.635916
EMP1	95.2777	0.298915	0.879296	0.119684	2.49754	0.0125059	0.635916
HMGB1	4822.52	-0.0973901	-0.0998833	0.0391286	-2.48897	0.0128112	0.635916
LINC00895	13.9449	0.262238	0.340839	0.105475	2.48625	0.0129096	0.635916
LINC01099	15.322	0.249063	0.310683	0.0998009	2.4956	0.0125745	0.635916
PACS2	236.917	0.225623	0.267212	0.0908385	2.48378	0.0129996	0.635916
PSMA6P2	63.9596	-0.174509	-0.190805	0.0701179	-2.48879	0.0128177	0.635916
PUS1	65.2265	-0.283828	-0.397947	0.11356	-2.49936	0.0124419	0.635916
RP11-1017G21.5	35.4077	-0.311777	-0.613371	0.125395	-2.48635	0.0129061	0.635916
RP11-1112J20.2	5.92687	-0.303691	-0.492878	0.12205	-2.48825	0.0128372	0.635916
S100Z	371.539	0.235965	0.285546	0.0949079	2.48625	0.0129096	0.635916
SLC35E2B	601.588	0.236711	0.286645	0.0950276	2.49097	0.0127395	0.635916
SNHG17	201.893	0.303003	0.488414	0.121528	2.49328	0.0126567	0.635916
SORL1	2197.79	0.163532	0.176663	0.0657624	2.48671	0.012893	0.635916
U2	857.119	-0.309677	-0.69191	0.124593	-2.48551	0.0129366	0.635916
AMFR	680.977	0.223373	0.263529	0.090058	2.48032	0.0131264	0.636107
SFSWAP	418.4	-0.192768	-0.215957	0.0776835	-2.48145	0.013085	0.636107
ZNF784	49.2962	0.295945	0.454392	0.119302	2.48064	0.0131149	0.636107
C17orf62	3203.76	-0.153813	-0.1646	0.0620842	-2.47749	0.0132312	0.639585
AGAP14P	14.9666	-0.280136	-0.393774	0.113781	-2.46207	0.0138139	0.646228
BCL9	43.1144	0.285896	0.946054	0.116394	2.45627	0.0140387	0.646228
CCT8	2358.31	-0.145984	-0.155265	0.0594723	-2.45465	0.0141021	0.646228
COX7A2L	1467.25	-0.112698	-0.116749	0.0459037	-2.4551	0.0140845	0.646228
CTDSP2	1646.34	0.145619	0.154771	0.0591451	2.46207	0.0138138	0.646228
DCUN1D4	259.793	-0.268929	-0.359674	0.109062	-2.46584	0.0136691	0.646228
IRF7	1623.39	-0.226837	-0.270232	0.0921615	-2.4613	0.0138436	0.646228
LY6E	2431.03	-0.302487	-0.499107	0.12268	-2.46566	0.0136761	0.646228
MEX3B	11.5195	-0.184457	-1.87771	0.0750103	-2.45909	0.013929	0.646228
MIR5684	5.96221	-0.285708	-0.900865	0.116226	-2.45821	0.0139631	0.646228
MTCO2P11	19.83	-0.293636	-0.829495	0.119567	-2.45584	0.0140558	0.646228
OSBPL3	200.228	0.288504	0.428721	0.117471	2.45595	0.0140511	0.646228
OSMR	9.483	0.273804	0.374153	0.11086	2.46982	0.0135182	0.646228
POLR2M	300.666	-0.226671	-0.269775	0.0919636	-2.4648	0.0137091	0.646228
RP1-99E18.2	102.913	0.308018	0.628596	0.125397	2.45633	0.0140363	0.646228
RP11-345K9.2	4.77933	0.307848	0.573022	0.124917	2.46442	0.0137236	0.646228
RP11-382A20.4	9.13989	0.283558	0.408062	0.115211	2.46121	0.013847	0.646228
RP11-395L14.18	12.5109	0.285106	0.97924	0.115336	2.47195	0.0134378	0.646228
S100A10	11331.1	0.185212	0.205778	0.0751838	2.46346	0.0137604	0.646228
SRSF4	997.956	-0.179146	-0.197494	0.0728418	-2.45939	0.0139173	0.646228
STARD5	10.9074	-0.291848	-0.856548	0.118547	-2.46187	0.0138216	0.646228
TMEM8B	142.408	0.292486	0.443406	0.118648	2.46514	0.0136958	0.646228
CC2D1B	125.458	0.261978	0.344113	0.106772	2.45363	0.0141422	0.646538
EIF5	2790.78	-0.178459	-0.196745	0.0728508	-2.44965	0.0142996	0.648595
IFI44	613.246	-0.301548	-0.504013	0.12308	-2.45002	0.014285	0.648595
ING1	299.331	-0.248246	-0.312293	0.101366	-2.449	0.0143252	0.648595
SH3BGRL	9981.6	-0.140107	-0.148272	0.0572203	-2.44856	0.0143427	0.648595
TOPORS	510.116	-0.219361	-0.258048	0.0895984	-2.44827	0.0143545	0.648595
AC079354.3	4.76487	0.302304	0.540414	0.124346	2.43114	0.0150512	0.653286
AP001442.2	25.2351	0.302127	0.527963	0.123935	2.43779	0.0147774	0.653286
CDK5RAP1	458.718	-0.182988	-0.203121	0.0749828	-2.44039	0.0146712	0.653286
CHMP4BP1	9.58425	0.295614	0.800482	0.121692	2.4292	0.0151323	0.653286
CTD-2054N24.2	13.7131	0.302722	0.710324	0.124319	2.43504	0.0148903	0.653286
CWC25	590.944	0.203915	0.233585	0.0834572	2.44335	0.0145515	0.653286
DCAF13P3	7.3317	-0.267595	-1.0119	0.110024	-2.43214	0.01501	0.653286
DDX55	284.304	-0.211654	-0.245884	0.0868786	-2.4362	0.0148425	0.653286
FBXL5	9443.05	-0.161427	-0.174574	0.0662054	-2.43827	0.0147576	0.653286
HMBS	424.91	-0.227175	-0.272311	0.09334	-2.43385	0.0149393	0.653286
KCNA3	139.417	0.285721	0.424272	0.117423	2.43325	0.0149638	0.653286
NARS	3273.17	-0.137709	-0.145544	0.0566152	-2.43236	0.0150007	0.653286
NPC1	307.072	0.260045	0.341859	0.106869	2.43331	0.0149613	0.653286
PIPSL	276.339	-0.12538	-0.131193	0.0515994	-2.42987	0.0151044	0.653286
PTER	348.936	-0.257546	-0.335009	0.105865	-2.43278	0.0149835	0.653286
RLIM	453.796	0.229403	0.27657	0.094238	2.43429	0.0149211	0.653286
RP11-5G9.5	5.68983	-0.270587	-1.00356	0.110793	-2.44227	0.0145951	0.653286
RP11-715J22.1	15.103	0.265759	0.357308	0.109342	2.43054	0.0150765	0.653286
RP11-815J21.4	7.54428	0.2916	0.867869	0.11938	2.44262	0.0145811	0.653286
SNX33	142.413	-0.271771	-0.372221	0.111465	-2.43817	0.0147618	0.653286
BAZ2A	657.903	0.185249	0.206637	0.0763528	2.42623	0.0152567	0.653415
CCR5	46.9742	0.292627	0.826391	0.120657	2.42528	0.0152966	0.653415
ETS1	9.25342	0.219782	1.62321	0.0905837	2.42629	0.015254	0.653415
HEATR5A	299.876	0.227664	0.273814	0.0937966	2.42721	0.0152154	0.653415
IER2	7658.63	-0.29023	-0.445997	0.119717	-2.42431	0.0153376	0.653415
RP11-628M2.1	8.34751	0.287502	0.436167	0.118586	2.42443	0.0153325	0.653415
CEP97	90.1105	0.283893	0.420442	0.117266	2.42094	0.0154804	0.658053
ADAP2	951.75	0.176096	0.194267	0.0729958	2.41241	0.0158475	0.661592
ALOX15B	129.868	0.286196	0.869319	0.118794	2.40918	0.0159883	0.661592
APH1B	581.949	0.182947	0.2037	0.0758296	2.4126	0.015839	0.661592
COX10	353.021	-0.218806	-0.25891	0.0908016	-2.40971	0.015965	0.661592
DTX3L	1160.55	-0.187572	-0.210207	0.0777874	-2.41134	0.0158941	0.661592
ECHDC1	1485.14	-0.183236	-0.204125	0.0760515	-2.40937	0.0159803	0.661592
ENOPH1	486.797	-0.218097	-0.257746	0.0905545	-2.40847	0.0160197	0.661592
MAPK13	60.2421	0.278234	0.400081	0.115234	2.4145	0.0157567	0.661592
NUP153	273.272	-0.235071	-0.288775	0.0976825	-2.40648	0.0161072	0.661592
PPFIA4	79.3684	0.291462	0.815418	0.120894	2.41088	0.015914	0.661592
PSMD4	2920.34	-0.107955	-0.111646	0.0448441	-2.40734	0.0160693	0.661592
STAT1	4469.13	-0.262562	-0.351298	0.109109	-2.40642	0.0161098	0.661592
TENM4	4.5834	0.183979	2.26993	0.0761739	2.41524	0.0157247	0.661592
TOB1-AS1	16.1605	-0.299988	-0.667493	0.124636	-2.40691	0.0160882	0.661592
WASH2P	351.087	-0.14465	-0.153985	0.0598599	-2.41647	0.0156718	0.661592
ZSCAN21	47.2427	-0.302124	-0.594741	0.125397	-2.40935	0.015981	0.661592
RNU4-62P	10.1744	-0.288981	-0.449398	0.120254	-2.40309	0.0162573	0.664835
RP11-205M3.1	8.85619	-0.264953	-0.358597	0.110221	-2.40383	0.0162242	0.664835
CABIN1	268.945	0.233081	0.285559	0.0970413	2.40187	0.0163114	0.665644
FBXO21	350.775	-0.224516	-0.269471	0.0935873	-2.399	0.0164397	0.667715
GOLIM4	566.603	-0.184365	-0.20596	0.0768692	-2.39843	0.0164655	0.667715
RAB6C	164.434	-0.16623	-0.181339	0.0693026	-2.39861	0.0164573	0.667715
USP33	1324.33	-0.164411	-0.178965	0.0685749	-2.39754	0.0165054	0.667936
NUP214	1425.55	0.185076	0.207083	0.0772557	2.39563	0.0165918	0.668638
RNVU1-4	9.77854	-0.293901	-0.732857	0.122658	-2.3961	0.0165705	0.668638
FAM122A	219.124	-0.265162	-0.360423	0.110736	-2.39455	0.0166409	0.669225
CCDC6	522.811	-0.215154	-0.253536	0.089961	-2.39163	0.0167736	0.671776
GS1-124K5.13	11.3806	-0.297659	-0.675283	0.124426	-2.39226	0.0167448	0.671776
CCNA2	7.82449	-0.200822	-1.54518	0.0840047	-2.3906	0.0168207	0.672273
ACOT8	399.844	0.194901	0.221594	0.0815803	2.38907	0.0168913	0.673706
HHEX	1526.91	-0.186251	-0.208918	0.0780421	-2.38655	0.0170072	0.676936
ZNF550	55.8215	-0.297619	-0.654443	0.124792	-2.38492	0.0170827	0.678547
ANKRD34B	27.5701	-0.25052	-1.07917	0.105268	-2.37984	0.0173204	0.679385
ANP32C	6.69887	-0.279595	-0.416401	0.117859	-2.37228	0.0176789	0.679385
BST1	3411.72	-0.143876	-0.153412	0.0605698	-2.37538	0.0175309	0.679385
CEBPB-AS1	13.4929	0.296213	0.681109	0.124566	2.37797	0.0174083	0.679385
CNR2	48.6457	0.206276	0.239831	0.0868702	2.37453	0.0175713	0.679385
CTB-186H2.3	8.42502	0.287157	0.458821	0.121114	2.37097	0.0177415	0.679385
FAM136A	659.303	-0.156957	-0.169709	0.066138	-2.37317	0.0176359	0.679385
LINC01003	213.907	0.234294	0.289731	0.0985348	2.37778	0.0174174	0.679385
NDST3	6.78098	0.286683	0.451565	0.120462	2.37985	0.0173197	0.679385
NR4A3	15.2013	-0.219569	-1.32926	0.0926227	-2.37057	0.0177606	0.679385
PSMC5	1647.17	-0.109281	-0.113244	0.0460977	-2.37063	0.0177579	0.679385
RNU2-1	72.4808	-0.29411	-0.701031	0.123578	-2.37995	0.0173149	0.679385
RP11-231E19.1	19.449	0.296441	0.677765	0.124625	2.37866	0.0173755	0.679385
SEC63	893.481	-0.171637	-0.188927	0.0723388	-2.37268	0.0176594	0.679385
SSBP3	77.0852	0.266152	0.368981	0.112267	2.3707	0.0177544	0.679385
TBC1D8	679.948	-0.221759	-0.265698	0.0932523	-2.37806	0.0174041	0.679385
TUBB2A	41.5599	0.297074	0.580115	0.125328	2.37038	0.0177697	0.679385
UBE2V2	1714.74	-0.147689	-0.158059	0.0621134	-2.37773	0.0174196	0.679385
WWP1P1	5.87198	0.298288	0.607355	0.125399	2.37871	0.0173735	0.679385
ACTG1P9	108.302	0.13274	0.140215	0.0563161	2.35705	0.0184209	0.682783
AKIRIN2	1500.99	0.189559	0.214277	0.0800688	2.36746	0.0179109	0.682783
FRRS1	18.7727	0.288167	0.468253	0.121797	2.36597	0.0179831	0.682783
HORMAD1	20.6899	-0.271845	-0.88228	0.115344	-2.35682	0.0184322	0.682783
LINC01239	4.44376	-0.29212	-0.507613	0.124041	-2.35503	0.018521	0.682783
LL22NC03-86G7.1	231.047	0.188357	0.212794	0.0799045	2.35728	0.0184096	0.682783
LRP1	2359.37	0.144198	0.15399	0.0611842	2.35679	0.0184337	0.682783
MIR4482	4.67717	-0.272478	-0.878428	0.115613	-2.35681	0.0184328	0.682783
NTMT1	175.731	-0.191473	-0.217379	0.081304	-2.35503	0.0185213	0.682783
PTGES2-AS1	27.8796	0.245056	0.31445	0.103824	2.36031	0.0182599	0.682783
RGS2	14015.9	-0.280544	-0.42574	0.119044	-2.35665	0.0184407	0.682783
RNF113A	362.592	-0.186569	-0.210128	0.0791675	-2.35664	0.0184412	0.682783
RP11-13J8.1	5.5973	0.288336	0.469996	0.12189	2.36554	0.0180036	0.682783
RP11-180M15.7	48.4354	-0.277576	-0.412314	0.1178	-2.35634	0.018456	0.682783
S100A11	17090	0.137361	0.145702	0.0582532	2.35799	0.0183742	0.682783
SNX2	5776.92	-0.141027	-0.150085	0.059737	-2.36081	0.0182353	0.682783
TRAPPC6B	408.384	0.248375	0.322361	0.105333	2.35799	0.018374	0.682783
UBL4A	719.609	-0.219221	-0.262051	0.0928131	-2.36197	0.0181783	0.682783
ZNF252P-AS1	6.4174	-0.242564	-1.11174	0.103004	-2.3549	0.0185279	0.682783
SLC6A4	19.0223	0.26175	0.359033	0.111267	2.35245	0.0186502	0.685987
AC079305.10	14.4972	-0.292762	-0.654766	0.124578	-2.35003	0.0187721	0.687859
KBTBD8	38.8745	0.238382	1.25099	0.101431	2.35019	0.0187637	0.687859
IQCG	144.92	-0.261088	-0.356513	0.111187	-2.34819	0.0188648	0.689953
UPB1	5.71119	0.262144	1.00798	0.111735	2.34611	0.0189703	0.692506
AC017104.2	13.5197	-0.286856	-0.468874	0.122339	-2.34476	0.0190392	0.693713
RP11-386M24.4	29.4963	0.188496	0.213347	0.080418	2.34396	0.0190804	0.69391
CLECL1	40.356	0.274341	0.882619	0.117161	2.34158	0.0192025	0.697045
EDF1	1097.48	0.133796	0.141596	0.0572102	2.33868	0.0193522	0.701166
SETDB2	288.654	-0.241522	-0.308255	0.103395	-2.33592	0.0194955	0.705037
HSP90B2P	82.3553	-0.163758	-0.17906	0.0701308	-2.33503	0.0195417	0.705395
CLSPN	47.8659	0.239416	0.304879	0.102837	2.32811	0.0199061	0.708745
EIF1AX	1012.72	-0.16194	-0.176733	0.0694757	-2.33089	0.019759	0.708745
L3MBTL2	279.641	-0.23186	-0.288198	0.0995625	-2.32879	0.0198703	0.708745
PSMD3	974.519	-0.158668	-0.172522	0.0681797	-2.3272	0.0199547	0.708745
RANGAP1	256.372	-0.222106	-0.269389	0.0955025	-2.32566	0.0200367	0.708745
RP11-981G7.1	17.7667	0.263158	0.368202	0.113051	2.32778	0.0199236	0.708745
SEMA4B	473.365	-0.242443	-0.311049	0.104106	-2.32882	0.0198684	0.708745
SFXN4	219.954	-0.237243	-0.299217	0.101735	-2.33197	0.0197023	0.708745
SLC23A2	274.988	0.264982	0.374091	0.11382	2.32809	0.0199073	0.708745
SRSF2	1948.05	-0.136583	-0.145017	0.0587055	-2.32659	0.0199873	0.708745
TUBB4A	13.1075	0.255829	0.346431	0.109996	2.3258	0.0200291	0.708745
EXTL3-AS1	28.4008	0.218906	0.263866	0.094192	2.32404	0.0201232	0.709213
RP11-634H22.1	8.67917	-0.265978	-0.886032	0.114435	-2.32426	0.0201115	0.709213
PRKAB2	176.632	-0.277315	-0.423668	0.119404	-2.32248	0.0202069	0.710873
EIF2A	708.318	-0.172143	-0.190619	0.0742292	-2.31908	0.0203907	0.712168
RP11-44F14.2	35.5221	0.216105	0.259084	0.0931815	2.31918	0.0203853	0.712168
RP11-554J4.1	33.654	0.273456	0.408791	0.117853	2.32032	0.0203235	0.712168
STBD1	12.4282	0.290328	0.629629	0.125135	2.32012	0.0203341	0.712168
ASCC2	1307.83	-0.142105	-0.151856	0.0614939	-2.31088	0.0208394	0.715415
CREBL2	892.69	-0.201229	-0.234074	0.0871692	-2.30849	0.020972	0.715415
GRB10	53.6359	0.268869	0.884392	0.116491	2.30807	0.0209952	0.715415
JRKL	91.9931	-0.289618	-0.602412	0.125269	-2.31197	0.0207793	0.715415
LRPPRC	674.475	-0.18887	-0.214838	0.0818095	-2.30865	0.0209629	0.715415
MUL1	477.88	0.183182	0.206538	0.0793919	2.30731	0.0210373	0.715415
PIGB	238.558	-0.229299	-0.284074	0.0990334	-2.31537	0.0205926	0.715415
PKN2	620.931	-0.162001	-0.177161	0.0701854	-2.30818	0.020989	0.715415
R3HCC1L	310.397	-0.250156	-0.331731	0.108126	-2.31356	0.020692	0.715415
RN7SL404P	7.41928	0.28785	0.516768	0.124447	2.31303	0.0207212	0.715415
RP11-20I23.6	23.5553	0.275389	0.420231	0.11902	2.31381	0.0206781	0.715415
RPL36AL	1813.05	0.133908	0.141932	0.0579119	2.31228	0.0207622	0.715415
SNORD59A	28.1224	-0.254269	-0.343718	0.110132	-2.30876	0.0209569	0.715415
TPRA1	581.991	-0.167956	-0.185118	0.0727735	-2.30792	0.0210034	0.715415
TSC1	430.075	0.226378	0.278745	0.097869	2.31307	0.0207189	0.715415
EPB41L3	989.249	-0.197207	-0.227768	0.085538	-2.30549	0.021139	0.717615
CBX1	278.636	-0.22603	-0.278482	0.0981689	-2.30247	0.0213089	0.717633
MATN1-AS1	14.3362	-0.241007	-1.05399	0.104686	-2.30219	0.0213246	0.717633
NHLRC2	220.731	0.234989	0.297299	0.101973	2.30442	0.021199	0.717633
NRG1	494.204	0.288636	0.560319	0.125302	2.30352	0.0212494	0.717633
XXbac-BPG299F13.17	158.763	0.236173	0.300046	0.10255	2.303	0.0212787	0.717633
EMC10	415.649	0.150981	0.163033	0.0656076	2.30127	0.0213765	0.718132
RP11-585P4.5	12.8507	0.271928	0.842681	0.118203	2.30051	0.0214195	0.718332
AC067945.3	4.95925	0.252642	1.02324	0.109997	2.29682	0.0216292	0.719156
EIF2S2	1489.68	-0.118299	-0.123756	0.0515003	-2.29705	0.0216158	0.719156
FAM188A	127.99	-0.26721	-0.387742	0.116235	-2.29888	0.0215116	0.719156
MAP4K2	315.766	-0.218487	-0.264419	0.0950946	-2.29758	0.0215857	0.719156
SLC25A45	152.044	0.216519	0.261056	0.0942693	2.29681	0.0216296	0.719156
DPPA4	9.13177	0.268006	0.394433	0.116857	2.29346	0.0218215	0.723588
RXFP2	89.4171	-0.255629	-0.350173	0.111473	-2.29318	0.0218376	0.723588
CATIP	40.2447	-0.28227	-0.473275	0.123167	-2.29177	0.0219187	0.725038
DFFB	146.627	-0.254343	-0.346902	0.111061	-2.29012	0.0220141	0.725759
PEX13	208.894	-0.237941	-0.304822	0.1039	-2.2901	0.0220154	0.725759
CDK11B	174.092	0.236896	0.303171	0.10354	2.28797	0.0221395	0.727377
RP11-94C24.13	6.26345	0.275012	0.430077	0.120176	2.2884	0.022114	0.727377
PTPA	479.51	0.187397	0.213429	0.0820227	2.2847	0.0223304	0.73117
SETP21	7.88732	-0.274928	-0.427751	0.1203	-2.28534	0.0222927	0.73117
FAM124B	48.1532	-0.268303	-0.812825	0.117537	-2.28271	0.0224473	0.733758
AF111168.1	30.1147	0.223111	0.274601	0.0978217	2.2808	0.0225606	0.735618
MRPL16	801.321	-0.124319	-0.13082	0.0545146	-2.28047	0.0225801	0.735618
AC243945.1	12.7854	0.267129	0.39713	0.11754	2.27267	0.0230458	0.735788
C2orf50	8.77262	0.267346	0.403173	0.118302	2.25985	0.0238305	0.735788
CIAPIN1	773.198	-0.151988	-0.164786	0.0671467	-2.26352	0.0236039	0.735788
CTD-2537I9.13	7.90055	-0.264176	-0.386728	0.116798	-2.26182	0.0237087	0.735788
DNASE2	1013.49	0.200025	0.234191	0.0884644	2.26108	0.0237543	0.735788
DNPH1	354.274	-0.192892	-0.222197	0.0849216	-2.27142	0.0231217	0.735788
DUXAP8	11.5062	0.278206	0.732329	0.12228	2.27515	0.0228968	0.735788
DUXAP9	6.36928	0.283362	0.611791	0.12517	2.26383	0.0235848	0.735788
EIF4A3	1204.31	-0.130266	-0.137936	0.0574892	-2.26591	0.0234566	0.735788
FAM84B	8.56955	0.282915	0.512199	0.124566	2.2712	0.0231346	0.735788
FOS	61245.1	-0.28361	-0.53623	0.125235	-2.26463	0.0235357	0.735788
IFIT5	306.741	-0.26157	-0.376867	0.115708	-2.26061	0.0237833	0.735788
IRS1	10.0967	0.204876	1.49335	0.0904128	2.26601	0.0234508	0.735788
IYD	19.3623	0.223664	0.276713	0.0985778	2.26891	0.0232739	0.735788
JUNB	23853.3	-0.256705	-0.356184	0.112661	-2.27856	0.0226933	0.735788
KIAA0922	1280.63	-0.197174	-0.229184	0.0869994	-2.26638	0.0234282	0.735788
LPAR6	1818.61	-0.228379	-0.286322	0.100865	-2.26421	0.0235613	0.735788
NSUN3	168.541	0.232758	0.295261	0.102323	2.27473	0.0229223	0.735788
PLP2	2633.53	0.191604	0.220015	0.0840512	2.2796	0.0226312	0.735788
PRPF40A	2312.34	-0.107284	-0.11142	0.0474201	-2.26242	0.0236717	0.735788
RIPK1	346.18	-0.234471	-0.300064	0.103761	-2.25973	0.0238379	0.735788
RP11-126O1.4	10.0096	-0.270285	-0.787774	0.11875	-2.27609	0.0228406	0.735788
RP11-181C21.4	14.0953	0.267443	0.400302	0.117936	2.2677	0.0233474	0.735788
RP11-350J20.5	13.4603	0.275623	0.439361	0.121048	2.27696	0.0227883	0.735788
RP11-739P1.3	4.82443	0.283146	0.512932	0.124577	2.27287	0.0230343	0.735788
RP5-1174N9.2	26.8953	0.275323	0.442091	0.121415	2.26761	0.0233529	0.735788
RRP9	122.193	-0.237379	-0.305241	0.10441	-2.27352	0.0229946	0.735788
SECISBP2	573.338	0.142275	0.152441	0.062538	2.27502	0.0229045	0.735788
SERPINE1	10.0666	0.278315	0.468946	0.123003	2.26266	0.0236565	0.735788
TBC1D23	523.953	-0.240879	-0.315112	0.10655	-2.26072	0.0237765	0.735788
TNRC6B	1240.73	0.127341	0.134474	0.056197	2.26598	0.0234526	0.735788
ZNF134	174.82	-0.285669	-0.557861	0.125382	-2.27839	0.0227033	0.735788
ZNF321P	26.1723	0.264528	0.38839	0.116692	2.26689	0.0233971	0.735788
RP11-84C10.2	54.3058	0.275777	0.451027	0.122094	2.25873	0.0239	0.736531
DDX28	438.584	-0.226575	-0.283174	0.100391	-2.25693	0.0240127	0.73883
CDKL3	5.70346	-0.251346	-0.915543	0.111439	-2.25547	0.0241041	0.739295
SEZ6L	52.954	-0.265601	-0.799029	0.117733	-2.25596	0.0240733	0.739295
FAM110A	527.746	-0.18403	-0.209183	0.081623	-2.25463	0.0241564	0.739728
CECR5	1193.11	-0.138478	-0.147978	0.0614885	-2.25209	0.0243167	0.741574
NUP62	1028.48	-0.151679	-0.164544	0.0673573	-2.25185	0.0243315	0.741574
PCDH9	31.0206	0.23018	0.291742	0.102202	2.25221	0.0243092	0.741574
RHBDD3	105.39	-0.241128	-0.317038	0.107141	-2.25057	0.0244127	0.742881
ABCF1	489.178	-0.141095	-0.151515	0.0634848	-2.22249	0.0262499	0.743642
AC006129.2	15.1779	0.275224	0.679732	0.123483	2.22885	0.025824	0.743642
AC007163.3	4.51899	-0.181699	-1.49407	0.0816385	-2.22565	0.0260376	0.743642
AC012370.3	5.6493	0.276286	0.492371	0.124349	2.22186	0.0262925	0.743642
AGAP6	65.8477	-0.232822	-0.300345	0.104781	-2.222	0.0262833	0.743642
AK1	9.06443	0.277932	0.521657	0.125045	2.22266	0.0262387	0.743642
AL591893.1	33.3148	0.241132	0.319576	0.107766	2.23755	0.0252506	0.743642
ANKRD10-IT1	35.545	0.265284	0.404037	0.1189	2.23115	0.0256712	0.743642
BACH1-AS1	12.42	0.256548	0.367723	0.114935	2.23212	0.0256073	0.743642
BCL6	1307.41	0.229724	0.291731	0.102491	2.24141	0.0249992	0.743642
C21orf62-AS1	13.0378	-0.276309	-0.632882	0.124273	-2.2234	0.0261887	0.743642
CH17-431G21.1	143.195	0.160871	0.1771	0.0723344	2.22399	0.0261491	0.743642
CH507-42P11.8	42.2567	-0.270753	-0.72414	0.121065	-2.23642	0.0253244	0.743642
CMPK2	726.609	-0.277667	-0.515192	0.125076	-2.21998	0.0264204	0.743642
CSTB	2549.02	0.162376	0.178967	0.0727098	2.2332	0.0255355	0.743642
CTC-524C5.2	20.7111	-0.277938	-0.634669	0.12432	-2.23566	0.0253741	0.743642
CTD-2300H10.2	8.98957	-0.257964	-0.367882	0.114912	-2.24488	0.0247757	0.743642
CTD-2542C24.5	25.9089	0.186591	0.214198	0.0839727	2.22204	0.0262806	0.743642
CTD-3131K8.2	46.0641	0.266684	0.412658	0.119755	2.22691	0.0259534	0.743642
EIF2AK2	804.721	-0.203598	-0.241061	0.0909346	-2.23895	0.0251593	0.743642
EPHB6	303.095	0.215609	0.262319	0.0958595	2.24922	0.0244987	0.743642
FAM213A	80.4409	-0.277308	-0.4712	0.123525	-2.24495	0.0247712	0.743642
FOXN3	910.232	-0.153677	-0.167485	0.0689996	-2.22722	0.0259327	0.743642
IRF5	3476.23	-0.121756	-0.128198	0.0547982	-2.2219	0.02629	0.743642
LAS1L	448.973	-0.183712	-0.209789	0.0827919	-2.21896	0.0264895	0.743642
LUADT1	9.29201	0.253396	0.357891	0.113788	2.22691	0.0259535	0.743642
MAGEA10	12.8568	0.228701	0.289122	0.101775	2.24713	0.0246317	0.743642
MCOLN2	13.0858	-0.236639	-1.01173	0.105614	-2.2406	0.0250521	0.743642
MGEA5	1322.47	0.161426	0.177946	0.0727519	2.21886	0.0264964	0.743642
MIR210HG	4.72491	0.275868	0.494828	0.124403	2.21754	0.026586	0.743642
MRPL48	333.711	-0.19534	-0.227702	0.0876241	-2.2293	0.0257942	0.743642
MYL5	89.6618	-0.260794	-0.381557	0.116788	-2.23306	0.025545	0.743642
NPEPPS	684.959	0.162329	0.178783	0.0724727	2.23986	0.0250997	0.743642
PLA2G12AP1	6.92939	0.27718	0.641579	0.124488	2.22656	0.0259768	0.743642
POU2F2	1271.67	0.182559	0.207343	0.081318	2.245	0.024768	0.743642
PSMA6P1	168.476	-0.13521	-0.144047	0.0601981	-2.24609	0.0246985	0.743642
RCSD1	4187.79	-0.149029	-0.161263	0.0664291	-2.24343	0.0248691	0.743642
RN7SL656P	15.0091	0.276209	0.491597	0.124324	2.22169	0.0263039	0.743642
RP11-110H1.8	19.3088	0.213772	0.259772	0.0955839	2.23649	0.0253199	0.743642
RP11-142L1.1	5.64478	-0.262331	-0.784403	0.117952	-2.22405	0.026145	0.743642
RP11-1K3.1	20.5017	-0.275001	-0.472682	0.123804	-2.22126	0.0263335	0.743642
RP11-21M24.2	16.7797	0.215859	0.264983	0.097318	2.21808	0.0265496	0.743642
RP11-370F5.4	5.77518	0.277119	0.47518	0.123487	2.24412	0.0248245	0.743642
RP11-512N4.2	6.04936	0.253595	0.919955	0.113596	2.23243	0.0255866	0.743642
RP11-514P8.8	197.252	-0.250799	-0.345938	0.112128	-2.23673	0.0253042	0.743642
RP11-554D14.2	9.4031	0.249518	0.34594	0.112293	2.22204	0.0262808	0.743642
RP11-662I13.3	4.64069	0.188856	1.69865	0.0840901	2.24587	0.024712	0.743642
RP11-778J16.2	8.43446	-0.260298	-0.378882	0.116423	-2.23579	0.0253653	0.743642
RP3-425C14.4	56.7244	0.277227	0.648435	0.124324	2.22988	0.0257555	0.743642
RP3-428L16.2	7.35807	0.232103	1.14942	0.103298	2.24693	0.0246445	0.743642
RPL23AP53	8.66634	-0.278307	-0.570622	0.125347	-2.2203	0.0263986	0.743642
S1PR4	495.217	0.203244	0.241203	0.0912679	2.2269	0.0259541	0.743642
SLC16A6P1	5.36464	0.278563	0.536289	0.125262	2.22385	0.0261586	0.743642
WDR59	221.354	-0.215345	-0.263589	0.0970637	-2.21859	0.0265146	0.743642
XAF1	327.264	-0.251738	-0.350284	0.112914	-2.22946	0.0257832	0.743642
ZNF768	48.8698	0.272784	0.458664	0.122966	2.21837	0.0265299	0.743642
AIFM2	23.4591	-0.276442	-0.612669	0.124718	-2.21653	0.0266551	0.743701
CD163	3111.45	0.241619	0.325046	0.109408	2.20843	0.0272144	0.743701
EPDR1	12.7107	0.240231	1.01062	0.1087	2.21004	0.0271027	0.743701
FBXW4	92.8819	0.262104	0.395663	0.118436	2.21304	0.0268948	0.743701
HBG2	5.37718	0.268573	0.731097	0.121516	2.21018	0.0270926	0.743701
LINC00152	179.833	0.191482	0.222258	0.0865648	2.21201	0.0269659	0.743701
MAPK6	282.135	0.260401	0.389736	0.117932	2.20806	0.0272404	0.743701
MAPKAPK5-AS1	427.844	-0.19671	-0.230844	0.0890862	-2.20809	0.0272379	0.743701
MCRIP2	291.87	-0.183863	-0.210269	0.0831658	-2.2108	0.0270496	0.743701
PWP1	518.884	-0.187373	-0.215574	0.0846254	-2.21415	0.0268187	0.743701
RHD	48.8949	-0.257067	-0.373871	0.116379	-2.20887	0.0271834	0.743701
RP11-644F5.10	56.0821	-0.255023	-0.365601	0.115317	-2.21149	0.0270022	0.743701
SSR1	6065.44	-0.120393	-0.126657	0.0543904	-2.21349	0.0268641	0.743701
VLDLR-AS1	8.4295	0.264954	0.410716	0.119786	2.21189	0.0269743	0.743701
XKR9	44.1241	0.182995	0.208945	0.0826236	2.21481	0.0267733	0.743701
ZNF408	164.513	-0.250525	-0.349981	0.113249	-2.21215	0.0269561	0.743701
ZNF702P	37.3015	-0.26423	-0.745349	0.119625	-2.20882	0.0271874	0.743701
CNTRL	957.105	-0.188432	-0.21759	0.0854876	-2.2042	0.0275104	0.744209
MRPS11	203.322	0.172297	0.193404	0.0781656	2.20425	0.0275064	0.744209
RP11-356M20.3	5.45895	0.271725	0.461062	0.123193	2.20568	0.0274064	0.744209
RP4-756H11.3	6.50173	-0.276203	-0.580511	0.125215	-2.20584	0.0273952	0.744209
SEC14L5	7.56911	0.273974	0.48836	0.124341	2.20341	0.0275661	0.744209
SNORA62	9.45838	-0.274482	-0.48945	0.124525	-2.20424	0.0275074	0.744209
SUPT3H	18.2771	-0.270098	-0.684643	0.122372	-2.20719	0.027301	0.744209
ZNF543	32.8279	-0.271291	-0.663366	0.123117	-2.20353	0.0275576	0.744209
MRPS18B	679.391	-0.166711	-0.185538	0.0757699	-2.20023	0.0277905	0.747423
RP11-400F19.18	15.3058	0.264515	0.75869	0.120199	2.20064	0.0277616	0.747423
SLC38A6	202.409	-0.247785	-0.343691	0.112625	-2.20009	0.0278009	0.747423
F3	17.1821	0.274909	0.599545	0.12509	2.19768	0.0279717	0.749934
RPL23AP57	4.86943	0.275431	0.535595	0.125302	2.19814	0.0279392	0.749934
LIN28A	17.4242	0.21759	0.270037	0.0990501	2.19677	0.028037	0.750649
ESRG	19.212	0.247826	0.345857	0.112846	2.19614	0.028082	0.750816
CLASP1	318.622	0.214872	0.264583	0.0978758	2.19536	0.0281381	0.75128
CLEC4G	94.4484	-0.266522	-0.42539	0.121447	-2.19455	0.0281958	0.751783
NUDT6	6.14897	0.233689	1.04388	0.106631	2.19157	0.0284107	0.756473
AC055733.1	14.6213	0.24461	0.337851	0.111927	2.18544	0.0288565	0.757048
APPBP2	454.831	-0.221763	-0.278808	0.101277	-2.18967	0.0285483	0.757048
CDK5R1	24.018	-0.210344	-1.15241	0.0962299	-2.18584	0.028827	0.757048
IKZF1	2150.7	-0.151978	-0.165871	0.0695018	-2.18668	0.0287656	0.757048
LILRA2	3465.77	-0.153533	-0.167954	0.0702892	-2.1843	0.02894	0.757048
LINC01534	8.03977	0.226365	1.10487	0.103617	2.18462	0.0289164	0.757048
MEF2C	1819.94	-0.128056	-0.135897	0.058489	-2.18941	0.0285671	0.757048
MTMR12	182.735	0.23099	0.300199	0.105479	2.18991	0.0285304	0.757048
PDIK1L	185.072	-0.270669	-0.467088	0.123903	-2.18452	0.0289237	0.757048
PSMA2	181.515	-0.146028	-0.158194	0.0668389	-2.18477	0.0289058	0.757048
RP13-554M15.7	21.0973	0.218831	0.273449	0.100153	2.18497	0.0288909	0.757048
SLX1B-SULT1A4	29.4036	0.243555	0.334339	0.111363	2.18703	0.0287404	0.757048
ZNF277	268.46	-0.222811	-0.281405	0.101932	-2.18587	0.0288249	0.757048
AC011380.8	68.3165	-0.222784	-0.28162	0.102066	-2.18274	0.029055	0.757918
CTB-75G16.1	34.1181	0.202795	0.242705	0.0929292	2.18226	0.0290905	0.757918
WASH7P	541.237	-0.157748	-0.1736	0.072263	-2.18296	0.0290384	0.757918
ARL6IP5	6893.95	-0.103203	-0.107161	0.0473058	-2.18162	0.0291377	0.758129
GLT8D1	622.975	-0.17972	-0.20491	0.0824009	-2.18104	0.0291803	0.758218
HERC2	227.966	0.198463	0.235239	0.0910242	2.18034	0.0292325	0.758558
VCAN-AS1	38.3415	-0.256419	-0.380318	0.117663	-2.17927	0.0293118	0.759599
RP11-172F10.1	6.40714	0.267545	0.447561	0.122808	2.17855	0.0293648	0.759957
DNAJB4	55.7879	-0.272921	-0.534046	0.125387	-2.17664	0.0295074	0.761132
HADHB	2826.47	-0.115365	-0.121039	0.0530209	-2.17584	0.0295673	0.761132
HSD17B8	48.8622	-0.271139	-0.483706	0.124556	-2.17685	0.0294918	0.761132
NCOA7	399.852	0.245071	0.340953	0.112612	2.17625	0.0295369	0.761132
AC006116.22	5.05992	-0.241884	-0.887954	0.111209	-2.17504	0.0296274	0.761668
CCR1	1589.16	0.227965	0.295004	0.104982	2.17148	0.0298949	0.761982
CXCR2P1	232.746	-0.272143	-0.513138	0.125215	-2.17341	0.0297493	0.761982
FSD2	22.7058	0.216252	0.269117	0.0995819	2.1716	0.029886	0.761982
ISCU	1427.99	0.121158	0.127847	0.0558353	2.16992	0.0300126	0.761982
POU2F3	5.0942	0.269604	0.633835	0.124261	2.16966	0.0300327	0.761982
RP11-15J10.1	187.285	-0.164764	-0.183459	0.0759033	-2.17071	0.0299534	0.761982
RP3-405J10.3	24.988	0.207767	0.252581	0.0957294	2.17036	0.0299798	0.761982
TICAM2	9.60912	-0.25576	-0.380069	0.117787	-2.17137	0.0299031	0.761982
TRAM1	4263.93	-0.137366	-0.147436	0.0632828	-2.17067	0.0299561	0.761982
ZNF148	674.397	-0.162435	-0.180222	0.0748304	-2.1707	0.0299536	0.761982
ESCO1	349.761	0.197876	0.234791	0.0912252	2.16909	0.0300756	0.762073
AUH	144.312	-0.235753	-0.314447	0.108744	-2.16797	0.0301607	0.762155
RP11-333J10.3	7.0473	0.247062	0.8825	0.113977	2.16765	0.0301855	0.762155
ZBTB11-AS1	32.5161	0.268486	0.4675	0.123869	2.1675	0.0301968	0.762155
AD000864.6	89.5013	-0.251143	-0.363849	0.116119	-2.16281	0.0305556	0.762274
AGAP4	39.1583	-0.206664	-0.25166	0.0962117	-2.14801	0.0317129	0.762274
C12orf4	260.947	-0.224689	-0.288008	0.103973	-2.16103	0.0306929	0.762274
CCBE1	25.574	0.201466	0.242012	0.0935632	2.15326	0.0312984	0.762274
CECR1	4363.75	0.181601	0.208898	0.0844805	2.14961	0.0315858	0.762274
CLEC7A	5397.71	-0.130484	-0.13919	0.0607447	-2.14807	0.0317078	0.762274
CLK3	1171.89	-0.1354	-0.145106	0.0626718	-2.16046	0.0307373	0.762274
CTC-232P5.1	4.45776	0.234219	0.981131	0.108586	2.15699	0.0310068	0.762274
DARS	766.356	-0.16822	-0.188879	0.0783125	-2.14806	0.0317088	0.762274
DHX34	232.843	0.203189	0.245166	0.0944007	2.15241	0.0313649	0.762274
EIF5P1	16.4837	-0.23155	-0.305443	0.107453	-2.15489	0.0311702	0.762274
FO538757.1	369.849	-0.129783	-0.138234	0.0600891	-2.15985	0.0307847	0.762274
GOSR1	338.309	0.174118	0.197367	0.0808079	2.15471	0.0311842	0.762274
GTF2IP11	6.23763	0.266479	0.454318	0.123321	2.16086	0.0307063	0.762274
H1FX-AS1	7.13355	0.269404	0.492558	0.124726	2.15996	0.030776	0.762274
IST1	2083.58	-0.1476	-0.160599	0.0684284	-2.157	0.0310056	0.762274
KB-1125A3.12	76.4875	0.151311	0.165427	0.070015	2.16112	0.0306859	0.762274
LINC01234	10.2556	0.243273	0.339887	0.11297	2.15343	0.0312847	0.762274
LSM1	247.179	-0.153493	-0.168461	0.0713899	-2.15006	0.0315502	0.762274
MYO5C	19.486	0.224006	0.288556	0.104298	2.14774	0.031734	0.762274
NOS2P3	5.51915	0.269507	0.534723	0.125367	2.14974	0.0315758	0.762274
PLK2	63.3555	-0.230835	-0.948183	0.107022	-2.15691	0.031013	0.762274
RAB11FIP1	999.52	0.170338	0.192014	0.079329	2.14724	0.0317745	0.762274
RNU2-63P	13.1022	-0.257989	-0.730216	0.119515	-2.15863	0.030879	0.762274
RP11-135N5.3	57.7129	0.26306	0.431967	0.122213	2.15248	0.0313596	0.762274
RP11-225N10.1	5.77449	-0.25236	-0.787808	0.116633	-2.16372	0.030486	0.762274
RP11-355B11.2	49.3578	-0.245611	-0.345287	0.113803	-2.15821	0.0309116	0.762274
RP11-613D13.8	9.34525	-0.262363	-0.422976	0.121838	-2.15338	0.0312891	0.762274
RP11-656E20.5	12.2836	-0.256895	-0.744743	0.118849	-2.16152	0.0306555	0.762274
RP11-705C15.3	47.5771	-0.269517	-0.571495	0.125147	-2.15361	0.0312709	0.762274
RP11-715J22.6	16.2913	-0.26231	-0.421094	0.121637	-2.15649	0.031045	0.762274
RPL36AP41	15.7585	0.2282	0.298461	0.10626	2.14756	0.0317487	0.762274
SRRM2	887.1	0.179328	0.205171	0.0831683	2.1562	0.0310678	0.762274
SUGT1P2	10.5099	-0.269794	-0.510785	0.125228	-2.15442	0.0312072	0.762274
TLR6	233.92	0.218169	0.27507	0.101484	2.14979	0.0315718	0.762274
TSPAN31	384.218	0.16386	0.182441	0.0758268	2.16097	0.0306974	0.762274
WASH6P	472.063	-0.138264	-0.148742	0.0641926	-2.15389	0.0312488	0.762274
XRCC4	346.425	-0.195854	-0.231707	0.0907694	-2.15771	0.0309506	0.762274
YTHDF3-AS1	21.7526	-0.268854	-0.564857	0.125209	-2.14724	0.0317739	0.762274
ZSCAN9	98.7278	0.26484	0.439617	0.122593	2.16033	0.0307472	0.762274
AC016734.2	647.201	-0.127532	-0.13563	0.0594382	-2.14562	0.0319031	0.763105
PLXNA2	56.8694	0.2676	0.605796	0.124716	2.14568	0.0318987	0.763105
RP11-641C17.2	5.13548	-0.268769	-0.560109	0.125282	-2.14532	0.0319272	0.763105
AC025171.1	37.2547	0.264493	0.451674	0.123405	2.1433	0.0320892	0.763212
DLD	1668.96	-0.171009	-0.193036	0.0797799	-2.14351	0.0320723	0.763212
RNU1-27P	4.44783	-0.256307	-0.724279	0.119564	-2.14368	0.0320586	0.763212
ZNF257	6.21208	0.267979	0.592767	0.124975	2.14426	0.0320122	0.763212
COX17	481.842	0.172952	0.196121	0.0809127	2.13752	0.032556	0.764928
HMGB3P9	8.84547	-0.219391	-1.01661	0.102592	-2.13849	0.0324769	0.764928
LY6G5B	28.242	0.268315	0.566536	0.125292	2.14152	0.0322318	0.764928
PTPRU	4.48267	-0.108712	-2.81065	0.0508521	-2.13782	0.0325316	0.764928
QTRT1	142.926	-0.229104	-0.301077	0.107082	-2.13953	0.0323928	0.764928
RP11-506M13.3	82.3248	0.242687	0.341257	0.113514	2.13795	0.0325207	0.764928
TMEM120B	53.5352	0.236397	0.321884	0.110581	2.13778	0.0325348	0.764928
WASH1	296.635	-0.123214	-0.130503	0.0576017	-2.13907	0.0324297	0.764928
WASH4P	128.514	-0.142571	-0.154377	0.066658	-2.13885	0.032448	0.764928
ZNF302	196.684	-0.23544	-0.31774	0.11	-2.14036	0.0323258	0.764928
ITPK1	1384.78	-0.159215	-0.176464	0.0745111	-2.1368	0.0326146	0.765377
AAMDC	82.9699	0.201519	0.243494	0.0946701	2.12865	0.0332832	0.766864
AC074289.1	275.067	0.193522	0.229332	0.0909747	2.12721	0.033403	0.766864
AL133335.1	14.1822	0.243305	0.345034	0.114201	2.1305	0.0331301	0.766864
ATF1	331.753	-0.202282	-0.244834	0.0951168	-2.12667	0.0334473	0.766864
BORCS6	144.164	-0.208625	-0.256924	0.0980657	-2.1274	0.0333872	0.766864
DOT1L	91.4176	0.240471	0.335764	0.112918	2.12961	0.0332037	0.766864
DPY19L3	168.806	0.232138	0.311352	0.109084	2.12807	0.0333311	0.766864
FAM60BP	8.62356	0.25249	0.380908	0.118317	2.13401	0.0328417	0.766864
GTPBP1	184.427	-0.224537	-0.290652	0.105234	-2.13368	0.0328686	0.766864
HSCB	116.673	-0.223623	-0.288579	0.104853	-2.13273	0.0329468	0.766864
LINC00869	79.1523	0.188677	0.220891	0.0884731	2.1326	0.0329579	0.766864
MPRIP-AS1	9.83886	0.208974	1.20826	0.0978738	2.13514	0.0327497	0.766864
MRPL46	85.0184	-0.228891	-0.301327	0.107329	-2.13261	0.0329569	0.766864
NRBP2	48.7461	-0.264338	-0.607475	0.124216	-2.12806	0.0333323	0.766864
NRM	339.83	0.17629	0.201411	0.0828207	2.12857	0.03329	0.766864
PAAF1	299.073	-0.213013	-0.265505	0.0999812	-2.13054	0.0331274	0.766864
POLE4	1196.27	0.117933	0.124336	0.0554215	2.12793	0.0333427	0.766864
TBC1D3K	11.2577	-0.2665	-0.496123	0.125105	-2.13021	0.0331539	0.766864
THAP7-AS1	16.1795	0.266003	0.578923	0.125095	2.12641	0.0334692	0.766864
TSPAN4	816.101	-0.1898	-0.222905	0.0892477	-2.12667	0.0334478	0.766864
FCF1	307.31	-0.156424	-0.172854	0.0735976	-2.12539	0.0335539	0.766992
LINC01410	366.098	0.2567	0.405942	0.120768	2.12555	0.0335403	0.766992
EIF5AL1	565.947	-0.141529	-0.153225	0.0666107	-2.12471	0.0336105	0.767381
NCBP2-AS2	1093.62	0.136019	0.146283	0.0640389	2.12401	0.0336697	0.767827
ARHGAP25	922.292	-0.204254	-0.248743	0.0961982	-2.12327	0.0337315	0.768334
F2R	20.5862	0.266148	0.531001	0.125392	2.12253	0.0337931	0.768834
LASP1	1674.74	0.159773	0.177586	0.0753114	2.12149	0.0338803	0.769913
TRIM22	3285.29	-0.197149	-0.235862	0.0929675	-2.12062	0.0339538	0.77068
C3orf33	28.6327	-0.26543	-0.510904	0.125334	-2.11779	0.0341932	0.775207
RP11-1020A11.2	48.4907	0.234425	0.319629	0.110721	2.11726	0.0342374	0.775302
AC018463.4	5.15871	0.264492	0.50173	0.12514	2.11358	0.0345514	0.776966
CCDC85C	23.1102	0.263227	0.605996	0.124519	2.11395	0.0345199	0.776966
EID1	2215.67	-0.0803438	-0.0822772	0.0379902	-2.11486	0.0344422	0.776966
EIF4BP6	57.4877	0.18497	0.215529	0.0874362	2.11549	0.0343883	0.776966
GLRX2	116.318	-0.214872	-0.270838	0.101648	-2.11389	0.034525	0.776966
ZNF248	85.9913	0.264707	0.56772	0.1252	2.11427	0.0344922	0.776966
CTD-2639E6.4	4.45375	0.264775	0.550453	0.125367	2.11201	0.0346859	0.777481
DDX60	363.28	-0.255851	-0.406854	0.121293	-2.10935	0.0349143	0.777481
FUOM	235.364	-0.195593	-0.233724	0.0927459	-2.10891	0.0349525	0.777481
HMGB1P4	25.8462	-0.186348	-0.217958	0.0883355	-2.10955	0.0348976	0.777481
LY75	99.0898	-0.256516	-0.411534	0.121654	-2.10857	0.0349817	0.777481
MRPL42	962.246	-0.15944	-0.177345	0.0755947	-2.10914	0.0349329	0.777481
RMDN2	180.695	0.241423	0.343242	0.114401	2.11032	0.034831	0.777481
RP11-101E13.5	62.9807	-0.183366	-0.21314	0.0869782	-2.10818	0.0350155	0.777481
RP11-700F16.3	8.84012	0.242144	0.34529	0.114621	2.11257	0.0346378	0.777481
SIK1	38.9836	-0.256308	-0.672909	0.121538	-2.10887	0.0349556	0.777481
SNORA70G	24.2442	0.254711	0.401839	0.120646	2.11122	0.0347532	0.777481
GPATCH2L	447.572	0.199055	0.240314	0.0944937	2.10654	0.0351576	0.778851
MRPL33	851.598	0.162388	0.181581	0.0770785	2.10678	0.0351363	0.778851
ATF4P3	97.178	0.192244	0.228392	0.0914479	2.10222	0.035534	0.779439
CLN5	428.769	-0.200115	-0.242096	0.0950326	-2.10575	0.0352263	0.779439
IL4R	649.712	-0.195462	-0.233865	0.0929851	-2.10208	0.035546	0.779439
LEKR1	24.474	-0.248931	-0.733888	0.118375	-2.1029	0.0354743	0.779439
PPP3CB-AS1	209.344	-0.211854	-0.265388	0.100736	-2.10305	0.0354611	0.779439
RP11-474P2.4	5.82138	-0.258013	-0.647297	0.122606	-2.10441	0.0353429	0.779439
TCEAL1	96.2332	0.227235	0.301992	0.108089	2.10229	0.0355275	0.779439
VIM	6850.32	0.158757	0.176535	0.0754447	2.10428	0.0353541	0.779439
ZNF514	20.9902	-0.19872	-1.14157	0.0944513	-2.10394	0.0353839	0.779439
TMEM68	176.882	-0.208772	-0.25917	0.0993442	-2.1015	0.0355971	0.779678
PANK2	1042.38	-0.163109	-0.182707	0.0776501	-2.10056	0.0356793	0.780596
LRP8	18.584	0.233128	0.909914	0.11101	2.10006	0.0357237	0.780685
AC138430.4	22.3231	0.186322	0.218496	0.0887934	2.09838	0.0358718	0.780819
ATP5C1	3361.84	-0.0937893	-0.0969813	0.0447495	-2.09588	0.0360931	0.780819
CTD-2012K14.8	6.62785	0.222313	1.00949	0.106037	2.09656	0.0360329	0.780819
CTD-3092A11.2	116.499	-0.233146	-0.318353	0.111142	-2.09774	0.0359283	0.780819
GLG1	2869.05	0.137262	0.148184	0.065515	2.09512	0.0361606	0.780819
NRIP3	32.6902	0.254193	0.40689	0.121264	2.09619	0.036065	0.780819
PNP	314.651	0.215834	0.274899	0.102904	2.09742	0.0359561	0.780819
RP11-316A16.1	12.9513	0.225645	0.298564	0.107574	2.09758	0.0359421	0.780819
RSAD2	296.651	-0.262653	-0.519179	0.1254	-2.09453	0.0362132	0.780819
SMC1A	1019.65	0.162863	0.182457	0.0776148	2.09834	0.0358749	0.780819
TCAIM	364.725	-0.211508	-0.265171	0.100856	-2.09713	0.0359818	0.780819
UBE2FP1	13.2296	0.251072	0.729056	0.11987	2.09454	0.0362116	0.780819
COQ3	41.2949	0.25295	0.704535	0.120892	2.09236	0.0364059	0.780842
JPH4	57.8108	0.261291	0.586297	0.124811	2.0935	0.0363048	0.780842
PTGES3P3	42.9942	-0.163567	-0.18355	0.0781606	-2.0927	0.0363758	0.780842
RP11-147I3.1	12.1773	-0.254192	-0.67039	0.121437	-2.0932	0.0363317	0.780842
SPC24	17.6362	0.231145	0.314412	0.110477	2.09226	0.0364156	0.780842
AC008427.2	24.7469	0.180903	0.210044	0.0866005	2.08894	0.0367133	0.781265
ADCK1	88.8869	-0.259293	-0.450077	0.124029	-2.09059	0.0365646	0.781265
CD163L1	10.027	0.144848	2.18576	0.0693829	2.08766	0.0368283	0.781265
CPNE8	894.259	-0.196375	-0.236364	0.0940989	-2.0869	0.0368976	0.781265
CTA-384D8.36	50.7412	-0.247662	-0.372017	0.118446	-2.09094	0.0365336	0.781265
LILRP2	99.3713	-0.208519	-0.259677	0.0998221	-2.0889	0.0367165	0.781265
MPZL2	260.038	-0.235823	-0.328551	0.113015	-2.08666	0.0369191	0.781265
PAK4	116.065	0.218517	0.282058	0.104668	2.08771	0.0368236	0.781265
RECK	225.006	-0.20441	-0.251503	0.0979268	-2.08738	0.0368538	0.781265
RP11-379K17.4	10.6733	-0.258581	-0.614474	0.123677	-2.09077	0.0365484	0.781265
TRIM72	87.8426	0.16342	0.183513	0.0782451	2.08857	0.0367468	0.781265
UBE2L6	4372.1	-0.147106	-0.160971	0.0703895	-2.08988	0.0366282	0.781265
CBX7	42.4134	0.253717	0.683615	0.121675	2.08521	0.0370505	0.781912
EIF1P3	193.554	0.119354	0.126331	0.0572764	2.08382	0.0371762	0.781912
RERE	215.107	-0.195954	-0.235822	0.0940771	-2.0829	0.0372599	0.781912
RP4-673M15.1	14.5399	-0.203101	-1.07787	0.0973815	-2.08562	0.0370128	0.781912
TYSND1	246.109	-0.172551	-0.197081	0.0828296	-2.0832	0.0372329	0.781912
XPO5	231.33	-0.23389	-0.323264	0.112298	-2.08277	0.0372723	0.781912
XRCC6P1	28.9469	-0.195814	-0.235566	0.0939632	-2.08395	0.0371649	0.781912
ZMAT1	61.3202	0.261128	0.540163	0.125368	2.08289	0.0372614	0.781912
RP11-489P6.1	12.9182	0.218773	0.28334	0.105102	2.08153	0.0373851	0.783431
MED15P9	6.1441	0.25237	0.404508	0.121274	2.08099	0.0374349	0.783627
C5orf15	1503.39	-0.14474	-0.158043	0.0696568	-2.0779	0.0377183	0.783688
CH17-373J23.1	79.1268	-0.259341	-0.567205	0.124858	-2.07708	0.0377942	0.783688
CNOT4	444.762	-0.169621	-0.192846	0.0816733	-2.07682	0.0378181	0.783688
CTBP2P6	6.0423	0.249385	0.388344	0.119969	2.07874	0.0376411	0.783688
KCNJ11	15.0476	0.199508	0.242911	0.0959233	2.07986	0.0375379	0.783688
NINJ1	5471.5	-0.160127	-0.179005	0.0770675	-2.07774	0.0377329	0.783688
RP11-217B7.2	10.273	-0.256418	-0.622435	0.123275	-2.08004	0.0375215	0.783688
RP11-423P10.2	14.8355	0.259413	0.576332	0.124924	2.07656	0.0378421	0.783688
RPGRIP1L	16.9052	0.232401	0.320726	0.111817	2.07841	0.0376716	0.783688
TMEM165	2391.32	-0.137781	-0.149037	0.0662892	-2.07848	0.0376651	0.783688
EIF2S2P4	198.842	-0.126215	-0.134653	0.0608103	-2.07555	0.0379357	0.784788
UBE2G2	1058.35	-0.137894	-0.149253	0.0665167	-2.07307	0.0381658	0.788705
AC006129.1	41.7301	-0.258176	-0.499801	0.125354	-2.05957	0.0394399	0.791086
AKAP6	8.28705	0.248226	0.392183	0.120705	2.05646	0.0397379	0.791086
ATG12	734.73	0.128498	0.13755	0.0621705	2.06687	0.0387467	0.791086
C17orf107	13.1148	-0.239222	-0.755415	0.116265	-2.05756	0.0396328	0.791086
CENPB	45.2368	0.25449	0.438809	0.123662	2.05795	0.0395946	0.791086
COA1	329.52	-0.176289	-0.203593	0.0855254	-2.06125	0.0392795	0.791086
DICER1	1172.61	-0.144712	-0.158142	0.0699367	-2.06918	0.0385288	0.791086
DNAJA1	3045.05	-0.164163	-0.185109	0.0794888	-2.06523	0.0389014	0.791086
FADS1	619.885	-0.222315	-0.294815	0.108112	-2.05634	0.0397502	0.791086
FDX1P1	24.4923	0.187387	0.221625	0.0905966	2.06836	0.0386057	0.791086
GM2A	2726.87	-0.198698	-0.242536	0.0965888	-2.05716	0.039671	0.791086
HSD3B7	28.6235	0.259152	0.49541	0.125219	2.06958	0.0384914	0.791086
LA16c-60G3.8	32.1855	-0.197541	-0.239573	0.095469	-2.06916	0.0385307	0.791086
LILRA1	3707.77	-0.139445	-0.151276	0.0673594	-2.07016	0.0384372	0.791086
LINC01431	4.82026	-0.228855	-0.844232	0.110995	-2.06185	0.0392217	0.791086
LRRC42	117.427	-0.247215	-0.378365	0.119477	-2.06915	0.0385324	0.791086
MED1	408.293	-0.227339	-0.307471	0.110215	-2.06268	0.0391427	0.791086
MOB1B	263.923	-0.221119	-0.291361	0.107387	-2.05908	0.0394868	0.791086
MRPS5	1480.41	-0.137865	-0.149311	0.0667433	-2.0656	0.0388658	0.791086
MTAP	215.021	-0.184115	-0.216365	0.0893625	-2.06031	0.0393685	0.791086
NOTCH4	63.4691	-0.246896	-0.381129	0.119934	-2.05859	0.0395334	0.791086
PNPT1	447.667	-0.200795	-0.246151	0.0973139	-2.06337	0.0390774	0.791086
RP11-312J18.5	100.484	-0.15451	-0.171615	0.0751314	-2.05653	0.0397311	0.791086
RP11-365O16.1	114.943	0.131964	0.141866	0.0639206	2.0645	0.0389704	0.791086
RP11-498C9.15	35.2641	-0.237636	-0.339514	0.115038	-2.06572	0.038855	0.791086
RP13-36G14.3	15.0235	-0.217504	-0.282856	0.105697	-2.0578	0.039609	0.791086
RP13-631K18.2	21.5271	0.196556	0.238778	0.0955658	2.05677	0.0397087	0.791086
SERPINB9	3381.91	-0.165984	-0.18797	0.0806422	-2.05827	0.0395642	0.791086
SLED1	10.3363	0.187807	1.32241	0.091198	2.05934	0.039462	0.791086
TBC1D3	10.5365	-0.252603	-0.417327	0.1227	-2.0587	0.0395227	0.791086
TMEM115	436.743	0.178003	0.206543	0.0864938	2.05799	0.0395912	0.791086
TRAPPC11	912.318	-0.166316	-0.188335	0.0806249	-2.06284	0.0391282	0.791086
TRIM62	143.099	-0.245083	-0.367413	0.118332	-2.07114	0.0383455	0.791086
TRPM6	39.1884	0.172189	0.197514	0.0837337	2.05639	0.0397447	0.791086
WDR11	879.667	-0.172648	-0.197868	0.083687	-2.06302	0.039111	0.791086
ZNF331	218.623	-0.243526	-0.362668	0.117928	-2.06504	0.038919	0.791086
KLK7	6.81752	0.244673	0.374316	0.119095	2.05443	0.0399337	0.79318
MCMDC2	11.0125	0.247182	0.703535	0.120318	2.0544	0.0399372	0.79318
ARL4AP2	104.824	0.257353	0.536928	0.125341	2.05322	0.0400509	0.794623
CTD-2278I10.4	5.89255	-0.257239	-0.502916	0.125386	-2.05157	0.0402116	0.796702
DRAXIN	47.8833	0.195584	0.237268	0.0953464	2.0513	0.0402379	0.796702
AC010518.2	12.6596	-0.256909	-0.522648	0.125373	-2.04916	0.0404464	0.798384
RP11-144C15.1	5.84262	-0.248089	-0.392817	0.121054	-2.04941	0.040422	0.798384
SNRPCP14	18.9124	0.197593	0.241167	0.0963875	2.04999	0.0403658	0.798384
RANBP9	132.488	0.214948	0.278145	0.104969	2.04773	0.0405861	0.799928
RPS6KA6	17.7232	0.2197	0.289912	0.107301	2.04752	0.0406072	0.799928
DUS3L	255.642	-0.203509	-0.252757	0.0994226	-2.04691	0.0406669	0.800291
TMEM150B	135.583	-0.198291	-0.242451	0.0969013	-2.04632	0.0407252	0.800626
RBAK	100.474	-0.256433	-0.497443	0.125363	-2.04553	0.040803	0.801343
AC010127.3	11.9849	-0.225713	-0.30599	0.110446	-2.04366	0.0409876	0.80141
DNAJA1P3	28.0276	-0.218926	-0.287747	0.107127	-2.04362	0.040991	0.80141
RP1-159A19.3	71.6556	0.172624	0.198508	0.0844151	2.04495	0.0408601	0.80141
RP11-268G12.1	11.3553	0.233279	0.330692	0.114162	2.0434	0.0410131	0.80141
RP11-521B24.3	20.7444	0.219959	0.291002	0.107584	2.04453	0.0409017	0.80141
TRAFD1	1907.02	-0.150735	-0.166676	0.0737906	-2.04274	0.0410779	0.801867
FAM230B	17.9546	0.210016	0.267465	0.102883	2.04131	0.0412204	0.803839
ACTR10	1592.47	-0.132434	-0.142753	0.0649661	-2.03851	0.0414989	0.804626
AGPAT5	223.53	-0.242251	-0.367103	0.11895	-2.03658	0.0416921	0.804626
ANKS4B	28.2016	0.192169	0.232381	0.094752	2.02812	0.0425475	0.804626
APOBEC3B	268.847	-0.246477	-0.39321	0.12142	-2.02996	0.0423605	0.804626
APOM	37.3828	-0.241498	-0.365062	0.11879	-2.03298	0.0420542	0.804626
BRD4	348.294	0.154387	0.17197	0.0759588	2.03251	0.0421019	0.804626
CA13	50.3519	-0.254653	-0.473712	0.125099	-2.03561	0.0417891	0.804626
CA6	10.1894	0.230315	0.323434	0.113269	2.03335	0.0420169	0.804626
CD79B	112.15	0.249236	0.412084	0.122475	2.03499	0.0418515	0.804626
CTD-2270P14.1	262.649	0.22583	0.308732	0.111015	2.03422	0.041929	0.804626
CTD-2547L16.1	14.9678	-0.253103	-0.446948	0.124374	-2.03502	0.041849	0.804626
EIF2S2P2	7.49413	-0.242197	-0.367476	0.118991	-2.03543	0.0418077	0.804626
FAM19A2	27.1999	0.240675	0.737156	0.118394	2.03282	0.0420703	0.804626
FANCF	133.013	-0.23502	-0.337287	0.115413	-2.03633	0.0417173	0.804626
GPR132	146.695	0.239762	0.35984	0.118122	2.02978	0.0423785	0.804626
KDM1A	546.871	-0.179982	-0.210879	0.0887413	-2.02817	0.0425429	0.804626
LINC01429	10.4982	0.226844	0.311102	0.111203	2.03991	0.0413597	0.804626
LIPT2	44.9555	-0.250341	-0.422677	0.123355	-2.02943	0.0424145	0.804626
NFATC2IP	413.023	-0.170059	-0.194904	0.083681	-2.03223	0.0421308	0.804626
PSMC1P3	9.63353	-0.230714	-0.323733	0.113587	-2.03116	0.0422385	0.804626
RP11-2C24.3	4.9361	0.241896	0.73758	0.118638	2.03894	0.0414565	0.804626
RP11-333E1.1	8.73288	-0.254664	-0.480846	0.125215	-2.03381	0.0419706	0.804626
RP11-732M18.4	10.5929	0.237945	0.349852	0.116758	2.03794	0.0415562	0.804626
SLC26A11	119.119	0.21912	0.289582	0.107491	2.03849	0.0415005	0.804626
SLC35E1	259.451	0.224117	0.304303	0.110354	2.03088	0.0422667	0.804626
SNORA19	5.09726	0.247257	0.65977	0.121905	2.02827	0.0425322	0.804626
TMEM88	5.80293	0.238896	0.750048	0.117785	2.02824	0.0425361	0.804626
TMSB15B	7.38212	0.254866	0.545851	0.125232	2.03515	0.0418353	0.804626
TRAF6P1	12.0144	0.245307	0.384242	0.120311	2.03893	0.0414569	0.804626
TRMO	289.775	-0.215313	-0.28078	0.106154	-2.02831	0.0425283	0.804626
UHRF1	25.9908	0.247637	0.403579	0.121955	2.03056	0.0422997	0.804626
CDA	2123.35	-0.140703	-0.153555	0.0694796	-2.02509	0.0428577	0.806707
MAPK6PS3	5.66121	0.252324	0.576063	0.124605	2.02498	0.0428692	0.806707
MAT2B	3253.63	-0.135047	-0.146242	0.0667025	-2.02461	0.0429073	0.806707
OSBPL9	732.624	-0.182255	-0.214822	0.0900075	-2.02488	0.0428793	0.806707
SCLT1	666.546	-0.198019	-0.243391	0.0977506	-2.02576	0.0427894	0.806707
ZNF493	149.451	0.223997	0.304921	0.110594	2.0254	0.0428259	0.806707
NEDD4L	49.8716	0.253779	0.515982	0.125398	2.02378	0.0429925	0.807364
RBL1	89.8464	0.242793	0.377613	0.120013	2.02306	0.0430672	0.807364
SIGLEC17P	21.5569	0.247944	0.641212	0.122549	2.02323	0.0430498	0.807364
CTC-308K20.3	30.3558	-0.22444	-0.305914	0.110972	-2.0225	0.0431243	0.807653
AC007881.4	186.077	-0.159935	-0.180101	0.0791473	-2.02072	0.0433083	0.810317
PLEKHD1	13.3608	0.244206	0.387283	0.120886	2.02013	0.0433702	0.810692
GBP4	623.226	-0.24425	-0.385625	0.12098	-2.01892	0.0434952	0.811337
NELFB	327.887	-0.146811	-0.161792	0.0727288	-2.01861	0.043528	0.811337
RN7SL798P	17.8329	0.252207	0.556891	0.124967	2.01818	0.0435721	0.811337
ZBTB11	430.994	-0.218171	-0.289277	0.108092	-2.01839	0.043551	0.811337
SLC39A8	204.67	0.252935	0.508139	0.1254	2.01702	0.0436932	0.812812
DHX15	985.333	-0.167473	-0.191443	0.0830484	-2.01658	0.0437397	0.81285
DYNLRB1	550.596	0.12352	0.131934	0.0612737	2.01587	0.0438137	0.81285
MRPL3	1008.65	-0.16584	-0.188993	0.0822702	-2.0158	0.0438211	0.81285
AC005785.5	5.35858	0.192897	1.17409	0.0959501	2.01039	0.0443904	0.814749
C19orf43	820.475	0.12409	0.132679	0.0617072	2.01095	0.0443312	0.814749
COPRS	233.797	0.194692	0.238005	0.0966778	2.01383	0.0440278	0.814749
DNMBP	143.419	0.246842	0.409966	0.12262	2.01307	0.0441072	0.814749
IFI6	2526.65	-0.250284	-0.444162	0.124465	-2.01089	0.0443375	0.814749
IL10	129.977	-0.228141	-0.319615	0.113486	-2.01031	0.0443983	0.814749
MTX3	68.6999	0.251866	0.485034	0.125265	2.01066	0.0443615	0.814749
RP11-13N13.5	13.935	0.213501	0.279031	0.106192	2.01052	0.0443762	0.814749
RPL21P123	28.7425	-0.249065	-0.427744	0.123784	-2.01209	0.0442103	0.814749
SLC9A4	68.1508	0.156622	0.175688	0.0778983	2.01059	0.0443688	0.814749
SREBF1	214.236	-0.211406	-0.27315	0.104997	-2.01345	0.0440673	0.814749
SYNCRIP	965.4	-0.117936	-0.125209	0.0586738	-2.01003	0.0444279	0.814749
DENND1A	2043.72	0.132793	0.14358	0.0660924	2.00921	0.044515	0.814836
SLC2A9	670.038	0.144177	0.158443	0.0717588	2.00919	0.0445167	0.814836
MSANTD2	54.4643	0.249025	0.590997	0.124068	2.00717	0.0447317	0.815213
PHF14	379.322	-0.154831	-0.173112	0.0771213	-2.00763	0.0446826	0.815213
RP11-351I24.1	21.631	0.249691	0.579331	0.124409	2.00702	0.0447476	0.815213
RP11-800A3.2	10.7834	0.221437	0.300549	0.110261	2.00829	0.0446123	0.815213
TMPRSS12	14.399	0.207971	0.266332	0.10362	2.00705	0.0447442	0.815213
FITM2	60.6247	0.237811	0.3594	0.118513	2.00662	0.04479	0.815221
ARID4A	878.356	-0.15562	-0.174276	0.0775723	-2.00612	0.0448431	0.815421
RP11-66B24.7	14.901	0.214647	0.28256	0.107063	2.00486	0.0449777	0.816336
ZNF274	204.407	-0.220624	-0.297854	0.110031	-2.00511	0.0449512	0.816336
C5orf63	7.99056	-0.211288	-0.905552	0.105508	-2.00259	0.0452216	0.81694
GFPT1	225.594	-0.217137	-0.288587	0.108346	-2.0041	0.0450592	0.81694
PA2G4	658.061	-0.123222	-0.131688	0.0615215	-2.0029	0.0451875	0.81694
RP11-58C22.2	10.2292	0.231289	0.3334	0.115432	2.00368	0.0451046	0.81694
USO1	691.738	-0.189884	-0.229412	0.094787	-2.00327	0.0451487	0.81694
HLCS	65.4458	0.24819	0.592386	0.123983	2.00181	0.0453054	0.81769
KIAA1161	22.9571	0.189625	0.229429	0.0948061	2.00013	0.0454858	0.817901
RHPN1-AS1	4.47047	-0.192935	-1.05116	0.0964543	-2.00027	0.0454706	0.817901
RP1-95L4.4	12.3176	-0.231558	-0.334043	0.115759	-2.00035	0.0454628	0.817901
RP11-318K15.2	40.0711	0.234899	0.348375	0.117383	2.00114	0.0453774	0.817901
GDPD3	17.321	0.241071	0.679267	0.120581	1.99924	0.0455822	0.818115
RP11-717A5.2	9.14599	0.245917	0.413646	0.123002	1.9993	0.0455762	0.818115
PCED1B-AS1	74.3508	0.242596	0.389156	0.121375	1.99873	0.0456376	0.818354
ALOX12-AS1	125.177	-0.199073	-0.247598	0.0996412	-1.99789	0.0457282	0.819219
DLEU7-AS1	9.20789	0.239383	0.694953	0.119883	1.9968	0.0458469	0.819504
RETSAT	145.347	0.245001	0.408042	0.12271	1.99658	0.0458709	0.819504
RP11-1157N2__B.2	5.5407	-0.250354	-0.489101	0.12538	-1.99676	0.0458508	0.819504
SEC24B-AS1	28.4275	0.242152	0.388042	0.121323	1.99592	0.0459422	0.820022
ELP4	218.876	0.191267	0.232761	0.0959155	1.99412	0.0461394	0.822149
HAUS4	273.797	0.168596	0.193994	0.0845493	1.99405	0.0461462	0.822149
DDX52	493.057	-0.160495	-0.181672	0.0805213	-1.9932	0.0462399	0.823062
RPF2	252.522	-0.186805	-0.224401	0.0937429	-1.99274	0.0462899	0.823195
RP11-327E2.5	60.4502	0.236904	0.360563	0.118922	1.99209	0.0463613	0.823709
ABHD17A	293.071	0.142605	0.156716	0.0717754	1.98682	0.0469427	0.823958
AC009506.1	55.9638	0.235822	0.356544	0.118537	1.98944	0.0466525	0.823958
ARHGEF40	1068.53	0.140302	0.153739	0.0708062	1.9815	0.0475354	0.823958
BCL2L1	224.765	-0.183766	-0.2196	0.0927538	-1.98123	0.0475657	0.823958
BTG2	3542.71	-0.243849	-0.408339	0.123114	-1.98067	0.0476284	0.823958
C2	48.2128	-0.245537	-0.415568	0.123422	-1.9894	0.0466566	0.823958
COMMD6	996.366	0.15033	0.167371	0.0758185	1.98276	0.0473943	0.823958
CTC-523E23.5	14.7067	0.221841	0.306045	0.111811	1.98407	0.0472478	0.823958
DFNB59	7.19606	-0.197298	-0.996545	0.0992179	-1.98853	0.0467529	0.823958
EMP2	45.5385	0.167906	0.193423	0.0847972	1.98009	0.047693	0.823958
FBXL4	270.422	0.225065	0.315335	0.113226	1.98775	0.046839	0.823958
GLTSCR1L	252.771	0.193669	0.237665	0.0973245	1.98993	0.0465981	0.823958
LCLAT1	139.517	-0.21322	-0.281361	0.107553	-1.98246	0.0474277	0.823958
LL22NC03-63E9.3	8.53006	0.232626	0.345497	0.11746	1.98048	0.04765	0.823958
MAFF	89.5112	0.226324	0.798016	0.114172	1.9823	0.0474459	0.823958
MARS	854.663	-0.136978	-0.149293	0.0690213	-1.98458	0.0471915	0.823958
METTL21B	104.44	-0.244465	-0.41014	0.123168	-1.98481	0.0471651	0.823958
PAX6	10.6632	-0.222637	-0.787898	0.112398	-1.98079	0.0476147	0.823958
PLD4	328.633	-0.241685	-0.388896	0.12176	-1.98492	0.0471533	0.823958
RASAL2-AS1	16.7961	-0.21175	-0.278143	0.106898	-1.98086	0.0476067	0.823958
RASSF7	354.227	-0.166322	-0.190724	0.0838169	-1.98435	0.0472174	0.823958
RP11-1114A5.4	37.9963	0.181612	0.21565	0.0914265	1.98642	0.0469865	0.823958
RP11-119D9.1	59.706	0.242406	0.394226	0.121905	1.98848	0.0467585	0.823958
RP11-252O18.3	11.0072	-0.235966	-0.355379	0.118561	-1.99024	0.046564	0.823958
RP11-286N22.6	33.476	0.239172	0.376619	0.120594	1.98328	0.047336	0.823958
RP11-399K21.12	18.9377	0.212924	0.923392	0.107378	1.98294	0.0473738	0.823958
RPP40	91.9333	-0.217497	-0.292553	0.109632	-1.98389	0.0472682	0.823958
SNORA70	84.2344	-0.194884	-0.240538	0.098416	-1.9802	0.0476808	0.823958
SNRNP40	775.14	-0.146074	-0.161493	0.0737368	-1.98102	0.0475889	0.823958
TMEM203	777.193	-0.141011	-0.154569	0.0709689	-1.98694	0.0469286	0.823958
TSPAN16	9.9976	0.238585	0.682346	0.120203	1.98485	0.0471608	0.823958
RBM43	56.2248	-0.23334	-0.34726	0.117866	-1.97971	0.0477364	0.823974
GTPBP10	138.308	0.212106	0.279516	0.107179	1.97899	0.0478167	0.824626
BLOC1S1	511.284	0.133628	0.145091	0.067641	1.97554	0.0482068	0.824921
HNRNPA1P50	12.0061	-0.230901	-0.338304	0.116834	-1.97631	0.0481195	0.824921
IFI35	981.82	-0.143638	-0.158271	0.072679	-1.97633	0.0481175	0.824921
MRPS35	565.527	-0.15603	-0.175591	0.0789447	-1.97645	0.0481043	0.824921
SERPINB1	5971.67	-0.113648	-0.120346	0.0575101	-1.97613	0.0481396	0.824921
U1	89.6571	-0.247958	-0.479465	0.125351	-1.9781	0.0479173	0.824921
USP41	17.0543	-0.226671	-0.752218	0.114599	-1.97795	0.0479342	0.824921
ZNF776	127.003	-0.246277	-0.44256	0.124668	-1.97545	0.0482169	0.824921
ZNF816	64.3174	-0.228568	-0.735025	0.11565	-1.97637	0.0481127	0.824921
C8orf44	32.2467	0.215191	0.288493	0.108976	1.97466	0.0483062	0.825292
PYHIN1	25.8549	0.22662	0.3238	0.114773	1.97451	0.0483237	0.825292
NAXD	257.433	-0.213496	-0.283226	0.108161	-1.97388	0.0483951	0.825783
SPIRE2	32.4328	0.18775	0.227598	0.0951963	1.97224	0.0485817	0.828239
FKBP1B	79.4578	0.245998	0.450491	0.124785	1.97137	0.0486815	0.829211
C9orf78	1621.14	-0.101525	-0.106224	0.0515754	-1.96847	0.0490145	0.830504
RAE1	560.582	-0.142023	-0.156222	0.0721181	-1.96932	0.0489167	0.830504
RINL	61.024	0.231842	0.345391	0.117667	1.97032	0.0488018	0.830504
SRSF8	668.651	-0.145099	-0.160399	0.0736998	-1.96879	0.0489776	0.830504
ZNF215	10.5532	0.246632	0.527426	0.125233	1.96939	0.0489086	0.830504
ZNF483	63.7411	0.146415	0.162233	0.0743637	1.9689	0.0489642	0.830504
GAREM2	14.3315	-0.246576	-0.50754	0.125328	-1.96745	0.0491311	0.831343
GPCPD1	3702.68	0.142792	0.157325	0.0725946	1.96698	0.0491861	0.831343
LRRC1	12.8326	0.193524	1.08963	0.0984081	1.96655	0.0492355	0.831343
RNVU1-19	17.8772	-0.217585	-0.808798	0.110641	-1.96659	0.0492301	0.831343
AC124944.3	15.2973	0.209416	0.275276	0.106804	1.96075	0.0499085	0.831552
CAMK1	1518.01	-0.117994	-0.125673	0.0600836	-1.96384	0.0495487	0.831552
DSC3	9.49151	0.224722	0.319692	0.114358	1.96507	0.0494056	0.831552
EMSY	241.045	0.190511	0.233641	0.0972159	1.95967	0.0500349	0.831552
GIT2	2154.18	-0.121208	-0.129612	0.0617708	-1.96223	0.049736	0.831552
JMJD1C	1943.88	0.132004	0.143235	0.0673995	1.95854	0.0501672	0.831552
KLRG1	29.7867	0.219678	0.827967	0.111998	1.96145	0.0498261	0.831552
MCCC2	400.526	-0.195847	-0.243946	0.0998636	-1.96115	0.0498617	0.831552
ORC3	337.355	-0.198739	-0.249902	0.101291	-1.96206	0.0497558	0.831552
PLXDC1	11.2403	0.229575	0.339488	0.117194	1.95894	0.05012	0.831552
PTPRG-AS1	17.3007	0.190536	0.233722	0.097246	1.95932	0.0500756	0.831552
RBM45	124.036	-0.224469	-0.318876	0.114618	-1.95841	0.0501817	0.831552
RP1-78O14.1	51.2773	0.146351	0.162229	0.0745378	1.96345	0.049594	0.831552
RP11-246A10.1	4.4331	0.2018	0.998059	0.102724	1.9645	0.0494722	0.831552
RP11-796A5.4	7.44551	0.243403	0.43085	0.1242	1.95976	0.0500234	0.831552
RP11-84G21.1	23.4974	-0.23915	-0.388368	0.122119	-1.95833	0.0501917	0.831552
RP13-616I3.1	8.6571	0.232418	0.350322	0.118312	1.96446	0.0494773	0.831552
SBNO2	290.974	0.175295	0.206118	0.0893798	1.96124	0.049851	0.831552
SEPT7P8	12.9473	0.227101	0.327928	0.115591	1.96469	0.0494499	0.831552
USP18	93.6061	-0.228039	-0.715712	0.116434	-1.95853	0.0501679	0.831552
VNN3	158.9	-0.243621	-0.423258	0.124044	-1.96399	0.049531	0.831552
ZNF786	73.577	-0.246066	-0.476455	0.125356	-1.96294	0.049653	0.831552
C16orf86	70.632	-0.205775	-0.266376	0.105265	-1.95484	0.0506025	0.834036
MKLN1	654.557	-0.148024	-0.164723	0.0757289	-1.95465	0.0506244	0.834036
PLA2G4A	124.823	0.243576	0.43937	0.124568	1.95536	0.0505403	0.834036
PPIG	993.755	-0.130777	-0.141682	0.0668669	-1.95578	0.0504906	0.834036
RP11-543B16.2	137.281	-0.126839	-0.136703	0.0649082	-1.95413	0.0506858	0.834036
RRS1-AS1	10.2823	0.223173	0.316667	0.114193	1.95435	0.0506596	0.834036
TREM1	2320.48	0.196276	0.245495	0.10032	1.9565	0.0504067	0.834036
ZNF211	424.039	-0.191611	-0.235949	0.0980501	-1.95421	0.050676	0.834036
ATF4	798.399	0.16262	0.186156	0.0833031	1.95215	0.0509209	0.835544
PTGES3	3275.91	-0.0879546	-0.0909927	0.0450605	-1.95192	0.0509475	0.835544
TMEM267	185.585	-0.212297	-0.283088	0.108714	-1.9528	0.0508436	0.835544
UBN1	529.787	0.158038	0.179246	0.0809663	1.9519	0.0509499	0.835544
JAM2	10.8637	0.230699	0.347287	0.118229	1.9513	0.0510217	0.836014
NUP188	372.046	-0.203874	-0.262455	0.104528	-1.95043	0.0511248	0.836997
CXorf40A	182.491	-0.161076	-0.183939	0.0827971	-1.94543	0.0517229	0.840399
EIF4A2P4	13.9229	-0.207088	-0.270395	0.106297	-1.9482	0.0513915	0.840399
ELL2P1	8.25476	0.242958	0.543305	0.124852	1.94597	0.0516586	0.840399
NCKAP1	27.172	0.184014	0.222211	0.0945458	1.9463	0.0516191	0.840399
RP11-22N19.2	110.865	-0.2355	-0.630895	0.121036	-1.94569	0.0516918	0.840399
RP11-382N13.1	4.65384	0.240259	0.411084	0.123465	1.94597	0.0516578	0.840399
RP11-440L14.1	48.0913	-0.198439	-0.250505	0.101879	-1.94779	0.0514403	0.840399
SEC16A	517.366	0.179066	0.213265	0.0919606	1.9472	0.0515103	0.840399
TMEM87A	915.576	-0.124796	-0.134227	0.0641166	-1.9464	0.051607	0.840399
ADD3	2660.03	-0.120981	-0.129519	0.0622488	-1.94351	0.0519551	0.841482
CTC-499J9.1	16.8912	-0.18737	-0.228678	0.0965185	-1.94129	0.0522236	0.841482
CTD-2201E18.3	62.7182	-0.21476	-0.291596	0.110624	-1.94135	0.0522154	0.841482
DDX50	374.759	-0.154724	-0.174562	0.0796209	-1.94325	0.0519854	0.841482
IKZF3	71.7188	0.196332	0.246843	0.101063	1.94267	0.0520555	0.841482
NMRK1	166.87	0.243589	0.50134	0.125378	1.94283	0.0520367	0.841482
NSUN6	114.048	-0.221441	-0.312165	0.113997	-1.94251	0.0520749	0.841482
RP11-1217F2.1	57.7023	0.176957	0.209768	0.0910271	1.944	0.0518952	0.841482
RPS2P32	29.2599	0.241435	0.561698	0.124364	1.94135	0.0522153	0.841482
WDR41	732.063	-0.174377	-0.205313	0.089777	-1.94234	0.0520963	0.841482
CD300A	2505.66	-0.11648	-0.124041	0.0600142	-1.94088	0.0522731	0.841579
AC074286.1	18.1334	-0.242788	-0.510108	0.125209	-1.93907	0.0524932	0.841898
FAM198B	2454.78	-0.187093	-0.228191	0.09645	-1.93979	0.0524051	0.841898
FAM89A	95.6641	0.241345	0.558849	0.12442	1.93976	0.0524092	0.841898
MRPS34	1049.89	-0.118229	-0.126189	0.0609868	-1.9386	0.0525499	0.841898
RN7SKP70	15.4869	-0.241816	-0.437491	0.124739	-1.93857	0.0525535	0.841898
RN7SL270P	6.58338	0.239922	0.415806	0.123749	1.93879	0.0525274	0.841898
SYMPK	502.23	-0.175048	-0.20666	0.0903331	-1.9378	0.0526471	0.842007
ZNF501	25.7888	-0.240927	-0.550418	0.124316	-1.93802	0.0526207	0.842007
RP11-672A2.5	10.6671	-0.217095	-0.776249	0.11206	-1.93731	0.0527074	0.842275
AC006026.1	11.5032	0.235606	0.384111	0.122003	1.93115	0.0534643	0.842917
ACAN	7.96482	0.238159	0.403568	0.123198	1.93313	0.0532198	0.842917
ARF6	4897.47	0.128714	0.139342	0.0665535	1.93399	0.0531138	0.842917
CPA4	12.2238	0.198353	0.25238	0.102726	1.93089	0.0534961	0.842917
CTA-384D8.35	28.3427	-0.242222	-0.465132	0.125321	-1.93281	0.0532595	0.842917
ITGAL	2204.25	-0.167704	-0.194834	0.0868785	-1.93033	0.0535661	0.842917
KDM4C	212.031	-0.142676	-0.157762	0.0737898	-1.93355	0.0531687	0.842917
MBIP	187.494	-0.21475	-0.292692	0.110963	-1.93533	0.0529499	0.842917
MED14OS	37.2018	0.234713	0.377891	0.121508	1.93166	0.0534013	0.842917
MST1P2	5.53447	-0.228999	-0.670313	0.118701	-1.92921	0.0537042	0.842917
MTRNR2L1	261.104	-0.225911	-0.70056	0.116822	-1.9338	0.0531375	0.842917
NEURL2	10.2789	-0.236768	-0.591704	0.12272	-1.92934	0.0536891	0.842917
PML	570.334	-0.184645	-0.224196	0.0956702	-1.93001	0.053605	0.842917
RASD1	16.919	-0.196593	-0.928251	0.101799	-1.93118	0.0534606	0.842917
RP11-278C7.1	25.3055	-0.213956	-0.291193	0.110796	-1.93108	0.0534734	0.842917
RP11-452C13.1	8.91005	0.208949	0.881109	0.108284	1.92965	0.0536506	0.842917
RP13-516M14.10	5.9671	0.208601	0.893702	0.107844	1.93428	0.0530787	0.842917
SH3RF2	10.2336	0.221852	0.317663	0.114901	1.93081	0.0535068	0.842917
SMPD1	137.665	0.178002	0.212259	0.0921759	1.93111	0.0534689	0.842917
SNORA28	4.64927	-0.210943	-0.814893	0.109211	-1.93152	0.0534186	0.842917
SUCLG2	510.258	-0.173967	-0.204901	0.0898509	-1.93618	0.0528458	0.842917
TRMT10B	215.99	-0.178379	-0.212842	0.0924595	-1.92927	0.0536974	0.842917
AC008982.2	26.4079	0.234466	0.378401	0.121624	1.92779	0.0538811	0.844276
CDCA4	208.293	0.235281	0.384808	0.122109	1.92681	0.054003	0.844276
EMILIN1	26.8699	0.23365	0.641234	0.121182	1.9281	0.053843	0.844276
MAN1A1	341.569	0.202627	0.262528	0.105139	1.92722	0.0539522	0.844276
RPL7P52	5.81784	0.219643	0.778543	0.113996	1.92677	0.0540086	0.844276
ADCY3	33.8158	-0.218094	-0.75268	0.113293	-1.92505	0.0542233	0.844914
CNST	286.505	0.181243	0.218414	0.0941629	1.92478	0.0542567	0.844914
ELF3	15.0343	-0.24096	-0.474518	0.125394	-1.92163	0.0546525	0.844914
FBXO7	2016.84	0.107472	0.113423	0.0559088	1.92228	0.0545705	0.844914
GARNL3	7.31286	-0.161709	-1.23224	0.0841127	-1.92253	0.0545392	0.844914
H2AFY2	31.6176	0.237825	0.583509	0.123524	1.92534	0.0541872	0.844914
H3F3AP5	64.2516	0.14323	0.158746	0.074468	1.92338	0.0544321	0.844914
HNRNPUP1	14.757	0.199507	0.255815	0.103766	1.92266	0.0545229	0.844914
KLF6	7144.57	0.234395	0.38216	0.122002	1.92124	0.0547013	0.844914
KRT8P33	7.16274	0.178	1.19572	0.0924664	1.92503	0.054226	0.844914
PAFAH1B2	1640.88	0.146382	0.163167	0.0761601	1.92203	0.0546016	0.844914
PGGT1B	1021.42	-0.162423	-0.186825	0.0845568	-1.92088	0.0547468	0.844914
PSMA3	1261.64	-0.120087	-0.128633	0.0624786	-1.92204	0.0546004	0.844914
ROM1	11.5325	-0.201248	-0.880261	0.104761	-1.92101	0.0547299	0.844914
SCFD1	1064.33	-0.149129	-0.166971	0.0775096	-1.92401	0.0543532	0.844914
SHROOM4	14.7163	0.232319	0.367138	0.120787	1.92337	0.0544331	0.844914
FRG1	388.201	0.132224	0.144079	0.0688998	1.91907	0.0549754	0.845249
GSDMA	15.6058	0.191105	0.237932	0.0995249	1.92017	0.0548362	0.845249
LA16c-313F4.1	6.77899	0.232691	0.636206	0.121257	1.91898	0.0549866	0.845249
PRKCA	136.623	0.217701	0.305782	0.113441	1.91907	0.0549751	0.845249
TUBA1C	1275.98	0.177973	0.212771	0.0926948	1.91999	0.0548588	0.845249
FBXL8	67.9834	-0.221091	-0.316633	0.115244	-1.91846	0.0550523	0.84559
MIR570	5.2698	-0.240156	-0.462503	0.125341	-1.91602	0.0553623	0.848335
RP11-18H7.1	9.35017	-0.240184	-0.462753	0.125339	-1.91628	0.0553291	0.848335
RP11-226L15.5	12.7025	-0.185004	-1.00424	0.0965495	-1.91616	0.0553448	0.848335
ABHD17AP1	56.3827	0.162425	0.191152	0.0896091	1.8126	0.0698941	0.848384
AC004076.7	16.7864	-0.222742	-0.570608	0.12213	-1.82381	0.0681803	0.848384
AC004540.5	8.15892	-0.188336	-0.860077	0.103118	-1.82641	0.0677888	0.848384
AC005775.2	13.6131	0.195707	0.254531	0.105539	1.85437	0.0636866	0.848384
AC007099.1	6.07668	0.227137	0.397383	0.123973	1.83215	0.0669286	0.848384
AC023590.1	17.424	0.191815	0.23985	0.100222	1.91391	0.0556315	0.848384
AC026271.5	130.571	-0.138577	-0.152728	0.0727437	-1.905	0.0567795	0.848384
AC114763.1	5.29045	0.217305	0.662678	0.118446	1.83463	0.0665607	0.848384
AC131263.1	7.3603	0.219744	0.345528	0.120503	1.82356	0.0682193	0.848384
AC145124.2	9.26778	-0.217926	-0.663183	0.117513	-1.85449	0.0636693	0.848384
AC159540.1	9.69138	-0.210045	-0.680941	0.115383	-1.82041	0.0686964	0.848384
ACTR3B	48.1495	0.227358	0.412301	0.124652	1.82393	0.068162	0.848384
ADA	161.719	-0.206405	-0.288152	0.113172	-1.82382	0.06818	0.848384
ADIPOR1P1	8.64368	0.212489	0.302096	0.114435	1.85686	0.0633318	0.848384
AF131216.6	22.5346	0.220317	0.642995	0.119664	1.84113	0.0656028	0.848384
AGAP12P	22.8227	-0.184983	-0.231856	0.100814	-1.83489	0.0665214	0.848384
AJ003147.11	87.8286	0.20453	0.282744	0.112054	1.82528	0.0679581	0.848384
AKNA	532.053	0.154545	0.176936	0.0833442	1.8543	0.0636968	0.848384
AL137860.1	14.6328	0.216166	0.32933	0.118978	1.81686	0.0692388	0.848384
AL590762.6	9.75726	-0.2273	-0.364667	0.121658	-1.86835	0.0617139	0.848384
ALDH16A1	420.238	0.14067	0.157123	0.0767724	1.8323	0.0669067	0.848384
ANKHD1	69.2256	-0.196674	-0.260579	0.10799	-1.82122	0.0685727	0.848384
ANKRA2	290.456	0.166708	0.197306	0.0907343	1.83732	0.0661622	0.848384
AP001626.2	16.5433	0.189521	0.241295	0.102876	1.84223	0.0654421	0.848384
APOA2	9.1053	-0.202695	-0.771106	0.109871	-1.84484	0.0650603	0.848384
APOBEC3A	2766.92	-0.223922	-0.356305	0.121304	-1.84595	0.0648988	0.848384
APOBEC3F	110.205	-0.186978	-0.23717	0.102539	-1.82349	0.0682294	0.848384
ARL4AP1	17.9541	0.234476	0.512627	0.125065	1.87483	0.0608154	0.848384
ASB3	16.0006	0.225438	0.382186	0.123216	1.82962	0.0673073	0.848384
ATP6V0A1	1282.43	0.164716	0.192318	0.0878792	1.87434	0.0608831	0.848384
B3GALT1	7.73363	0.222736	0.358663	0.121538	1.83265	0.0668542	0.848384
BAIAP2L1	12.8222	-0.235399	-0.550352	0.123969	-1.89886	0.057583	0.848384
BCDIN3D-AS1	10.9661	0.236331	0.565646	0.123925	1.90705	0.0565141	0.848384
BCL10	570.935	0.142026	0.159035	0.0774783	1.83311	0.0667865	0.848384
BCL7B	1081.34	0.157837	0.182191	0.0852968	1.85045	0.0642489	0.848384
BHMT2	20.1934	0.188864	0.239098	0.102052	1.85066	0.064218	0.848384
BICD2	1332.2	0.153246	0.173908	0.0811134	1.88928	0.0588547	0.848384
BISPR	370.212	-0.164026	-0.190102	0.0863278	-1.90004	0.057428	0.848384
BOLL	7.28534	0.228511	0.363683	0.121025	1.88813	0.0590083	0.848384
BRPF1	427.83	0.173652	0.210799	0.0954765	1.81879	0.0689427	0.848384
BRPF3	49.4998	-0.228632	-0.526261	0.124199	-1.84086	0.0656422	0.848384
BTBD3	181.249	0.237	0.440402	0.124967	1.8965	0.0578942	0.848384
BTF3L4P2	58.7532	-0.132004	-0.145536	0.0728608	-1.81173	0.0700276	0.848384
C12orf77	39.2459	0.197322	0.254639	0.104594	1.88655	0.0592209	0.848384
C17orf80	136.878	-0.236371	-0.46615	0.125397	-1.88499	0.0594318	0.848384
C18orf32	129.258	0.126515	0.137259	0.0673229	1.87923	0.0602127	0.848384
C19orf66	386.725	-0.12601	-0.136878	0.0678244	-1.85788	0.0631864	0.848384
C2CD5	358.2	-0.207691	-0.28142	0.110391	-1.88141	0.0599165	0.848384
C6orf226	95.4269	0.18257	0.225747	0.0985558	1.85245	0.0639612	0.848384
C6orf25	13.5002	0.230765	0.503806	0.125052	1.84535	0.0649862	0.848384
C8orf37	28.4664	-0.231108	-0.507081	0.124835	-1.8513	0.0641258	0.848384
C9orf3	41.0925	0.215608	0.694956	0.11683	1.84548	0.0649671	0.848384
CAHM	47.804	-0.2056	-0.271911	0.107822	-1.90685	0.0565394	0.848384
CAPN3	7.33045	-0.219627	-0.704777	0.115783	-1.89688	0.0578437	0.848384
CAT	5064.57	-0.132079	-0.144371	0.0700189	-1.88633	0.0592498	0.848384
CD2AP	159.725	-0.216086	-0.306714	0.114547	-1.88644	0.0592356	0.848384
CDC42	5522.74	0.119168	0.128699	0.06566	1.81492	0.0695356	0.848384
CDH18	5.00696	-0.226667	-0.377225	0.122877	-1.84466	0.0650876	0.848384
CEBPE	63.0222	-0.211689	-0.308142	0.116457	-1.81774	0.0691035	0.848384
CH507-42P11.1	14.9087	0.235026	0.400259	0.12337	1.90505	0.0567739	0.848384
CHCHD10	229.298	-0.140997	-0.156326	0.0746105	-1.88977	0.058789	0.848384
CLCF1	48.0606	-0.222634	-0.570779	0.12213	-1.82293	0.0683142	0.848384
CMAS	937.9	-0.141619	-0.158102	0.0766699	-1.84712	0.0647292	0.848384
COL9A2	207.493	-0.220113	-0.350639	0.121346	-1.81393	0.0696884	0.848384
COQ9	477.336	-0.17237	-0.203568	0.0904058	-1.90663	0.0565686	0.848384
CRIP3	39.5997	-0.230488	-0.608406	0.121414	-1.89836	0.0576483	0.848384
CRNKL1	384.119	-0.179804	-0.21849	0.0958111	-1.87665	0.0605666	0.848384
CTA-992D9.10	5.89773	-0.230282	-0.368641	0.121545	-1.89463	0.0581417	0.848384
CTB-139P11.2	8.86368	-0.231119	-0.537409	0.124071	-1.8628	0.0624904	0.848384
CTB-31O20.2	143.136	0.193934	0.253685	0.106299	1.82443	0.0680878	0.848384
CTC-241F20.4	5.72817	-0.221239	-0.611167	0.120245	-1.8399	0.065783	0.848384
CTC-444N24.11	142.914	-0.218791	-0.324566	0.117675	-1.85928	0.0629872	0.848384
CTC-471J1.11	20.4728	-0.229648	-0.640058	0.119984	-1.91399	0.0556213	0.848384
CTD-2006C1.2	100.514	-0.165661	-0.193818	0.0884091	-1.8738	0.0609584	0.848384
CTD-2095E4.3	11.9541	-0.22844	-0.538986	0.123795	-1.8453	0.0649937	0.848384
CTD-2561J22.1	9.17279	0.230146	0.369623	0.121392	1.8959	0.0579738	0.848384
CTD-2574D22.3	31.6966	0.22659	0.360195	0.121037	1.87207	0.0611973	0.848384
CTD-2619J13.17	13.3844	-0.229248	-0.381703	0.122909	-1.86519	0.0621549	0.848384
CTD-2647E9.1	21.4702	0.221092	0.360448	0.121993	1.81233	0.0699354	0.848384
CXCL2	84.4824	-0.202795	-0.787732	0.109088	-1.85899	0.0630281	0.848384
CYP2B7P	11.0373	0.234294	0.417828	0.12439	1.88354	0.059627	0.848384
CYTH2	281.602	0.154838	0.175614	0.0809546	1.91266	0.0557922	0.848384
DCUN1D2	99.6759	-0.191295	-0.244124	0.103342	-1.85109	0.0641569	0.848384
DDX42	416.685	-0.162797	-0.189454	0.0872478	-1.86591	0.0620541	0.848384
DIP2A	446.517	0.164341	0.193993	0.090191	1.82214	0.0684331	0.848384
DLEC1	30.1084	-0.229067	-0.381677	0.122947	-1.86313	0.0624437	0.848384
DSN1	109.86	-0.228013	-0.348576	0.119412	-1.90946	0.0562023	0.848384
E2F3P2	23.8893	0.179761	0.220172	0.0969264	1.85461	0.0636514	0.848384
EBAG9	297.41	-0.155659	-0.178732	0.0841483	-1.84981	0.0643407	0.848384
EEF1A1P24	113.966	0.119029	0.127815	0.0634554	1.8758	0.0606831	0.848384
EID2B	41.6489	-0.224882	-0.382849	0.123575	-1.8198	0.0687893	0.848384
EIF1AD	273.116	0.151318	0.172519	0.0823005	1.8386	0.0659743	0.848384
EP300	651.604	0.167889	0.199189	0.0912095	1.8407	0.0656661	0.848384
EPC1	269.843	0.171305	0.203274	0.091242	1.87747	0.060453	0.848384
EPS8L1	20.8871	-0.205073	-0.734886	0.111991	-1.83116	0.0670773	0.848384
EPSTI1	489.579	-0.232363	-0.401994	0.123952	-1.87462	0.0608448	0.848384
ETF1	1081.68	0.158099	0.183038	0.0859875	1.83863	0.0659692	0.848384
EXOC7	1807.06	-0.137937	-0.151898	0.0724814	-1.90307	0.057032	0.848384
FAM101B	915.344	-0.18715	-0.236036	0.101718	-1.8399	0.0657836	0.848384
FAM105A	3419.08	-0.143308	-0.159403	0.0755919	-1.89582	0.0579844	0.848384
FAM110B	100.138	-0.23124	-0.403047	0.12411	-1.86319	0.0624359	0.848384
FAM127A	423.914	0.118367	0.127649	0.0651125	1.81789	0.0690807	0.848384
FAM189B	91.1605	0.215122	0.30628	0.114538	1.87818	0.0603568	0.848384
FAM21FP	104.323	0.15144	0.172653	0.0823314	1.83939	0.0658577	0.848384
FAM49B	5516.19	-0.103516	-0.109169	0.0555831	-1.86236	0.0625528	0.848384
FAM76A	401.18	0.146712	0.165338	0.0792583	1.85107	0.0641601	0.848384
FAN1	51.2304	-0.231366	-0.420208	0.12482	-1.8536	0.0637966	0.848384
FANCD2	96.9909	0.198936	0.264728	0.10827	1.8374	0.0661509	0.848384
FFAR3	5.45328	-0.118643	-1.74291	0.0634232	-1.87066	0.0613922	0.848384
FHL3	928.48	-0.167019	-0.198953	0.0921213	-1.81303	0.0698267	0.848384
FNTB	181.556	-0.195658	-0.255065	0.106109	-1.84394	0.0651922	0.848384
FXNP2	5.52319	-0.225475	-0.396863	0.124336	-1.81343	0.0697658	0.848384
GABARAP	129.163	-0.131925	-0.143745	0.0689527	-1.91327	0.0557134	0.848384
GCC2-AS1	8.03372	-0.222545	-0.64674	0.118814	-1.87306	0.0610599	0.848384
GINS4	37.7433	-0.20788	-0.278618	0.109229	-1.90316	0.0570196	0.848384
GORASP2	1150.88	-0.151655	-0.173804	0.0836734	-1.81246	0.0699146	0.848384
GPATCH3	235.118	0.175966	0.213498	0.0953964	1.84457	0.0650996	0.848384
GPR107	226.163	0.200235	0.263019	0.106795	1.87495	0.0607994	0.848384
GS1-124K5.4	13.5033	0.237043	0.55211	0.124353	1.90622	0.0566221	0.848384
GS1-590J6.3	7.30147	-0.161143	-1.08311	0.0885105	-1.82061	0.0686657	0.848384
HELQ	212.834	-0.167757	-0.197332	0.0895973	-1.87234	0.0611597	0.848384
HFE	179.933	-0.209294	-0.295494	0.114121	-1.83396	0.0666606	0.848384
HLA-DOA	140.443	-0.23042	-0.470293	0.125359	-1.83808	0.0660501	0.848384
HOXA5	7.26279	-0.123207	-1.70925	0.0650508	-1.89402	0.0582229	0.848384
HSP90B1	4520.01	-0.118809	-0.128048	0.0649075	-1.83043	0.0671856	0.848384
IDH2	2085.88	-0.0997268	-0.104579	0.0527615	-1.89014	0.0587389	0.848384
IFT27	234.185	-0.156151	-0.179263	0.084091	-1.85692	0.0633219	0.848384
IMMP1L	22.0979	0.238318	0.480818	0.125401	1.90044	0.0573755	0.848384
INTS6	396.786	-0.179483	-0.217479	0.0953095	-1.88316	0.0596785	0.848384
IQCC	17.8199	-0.230055	-0.453505	0.125396	-1.83462	0.0665615	0.848384
IRAK3	1780.81	-0.159024	-0.184727	0.0868456	-1.83111	0.0670835	0.848384
IRF4	163.012	0.218756	0.640855	0.119506	1.83051	0.0671738	0.848384
ISOC1	407.201	0.182906	0.227249	0.0993199	1.84158	0.065536	0.848384
ITGA4	3349.86	-0.167833	-0.198519	0.0907215	-1.84998	0.0643166	0.848384
KCNB1	4.8398	0.237056	0.417022	0.124097	1.91025	0.056101	0.848384
KDM6B	184.286	0.201123	0.262509	0.106047	1.89654	0.057889	0.848384
KIF9-AS1	22.5098	-0.223522	-0.547793	0.123098	-1.81581	0.0693997	0.848384
KLF13	191.464	0.19648	0.252509	0.104121	1.88704	0.0591553	0.848384
KLF5	33.6619	0.182141	0.968218	0.100136	1.81895	0.0689192	0.848384
LDLRAD4	177.175	-0.204754	-0.283679	0.112509	-1.81989	0.0687751	0.848384
LEPROTL1	1453.64	-0.126855	-0.1381	0.0686142	-1.84881	0.0644854	0.848384
LINC00352	14.99	0.191885	0.2493	0.105456	1.81958	0.0688231	0.848384
LINC00355	39.4605	0.17331	0.20627	0.0918047	1.88781	0.0590509	0.848384
LINC00623	36.6229	0.199771	0.267915	0.1091	1.83108	0.067088	0.848384
LINC00624	39.253	-0.226174	-0.508009	0.12455	-1.81593	0.0693811	0.848384
LINC01252	26.4177	-0.233287	-0.424559	0.124839	-1.86871	0.0616638	0.848384
LINC01443	13.2186	0.207325	0.289325	0.112897	1.8364	0.0662978	0.848384
LONRF3	36.581	0.225291	0.572863	0.122844	1.83397	0.0666588	0.848384
LRRC14	287.209	0.171142	0.203765	0.0919017	1.86223	0.0625702	0.848384
LXN	96.0443	0.228477	0.379557	0.122631	1.86314	0.0624431	0.848384
LY6G5C	47.0815	0.219838	0.338755	0.119557	1.83877	0.0659494	0.848384
LZTR1	453.595	0.162616	0.190407	0.0884948	1.83758	0.0661245	0.848384
MAGI2	35.3431	0.150018	0.171277	0.0826296	1.81554	0.0694403	0.848384
MAPK1IP1L	2313.32	0.110021	0.116955	0.0592184	1.85788	0.0631858	0.848384
MCC	24.6841	0.230459	0.64192	0.120849	1.90701	0.0565198	0.848384
MKRN9P	33.2457	0.151737	0.172926	0.0821918	1.84614	0.0648721	0.848384
MORN3	34.4395	0.180983	0.224613	0.0991161	1.82597	0.067855	0.848384
MRPS17P1	39.4888	0.144129	0.161153	0.0770629	1.87028	0.0614448	0.848384
MTHFD1	349.833	-0.17376	-0.208479	0.0935077	-1.85825	0.0631338	0.848384
MTHFD1P1	7.91596	-0.226243	-0.379264	0.123156	-1.83704	0.0662036	0.848384
MTSS1	366.305	0.214293	0.309653	0.115642	1.85306	0.0638731	0.848384
MXD1	2021.03	-0.193764	-0.247537	0.10351	-1.87193	0.0612163	0.848384
MYB	56.7499	0.235372	0.436992	0.124954	1.88367	0.0596097	0.848384
N4BP2L1	1096.45	-0.149726	-0.168288	0.0786013	-1.90488	0.0567957	0.848384
NAPB	245.264	-0.214164	-0.316582	0.117443	-1.82356	0.0682192	0.848384
NCOA1	450.891	0.15515	0.17668	0.0819933	1.89223	0.0584608	0.848384
NEK9	704.821	-0.139947	-0.154923	0.0741386	-1.88763	0.0590751	0.848384
NHEJ1	42.0897	-0.224502	-0.341404	0.119143	-1.8843	0.0595248	0.848384
NKG7	116.266	0.236786	0.422248	0.12437	1.90388	0.0569262	0.848384
NMUR1	7.86031	0.220544	0.342086	0.119849	1.84018	0.065742	0.848384
NONO	2301.31	-0.0941244	-0.0983851	0.0510539	-1.84363	0.0652374	0.848384
NPPA-AS1	39.1268	0.234161	0.384544	0.122244	1.91553	0.0554251	0.848384
NTNG2	42.7917	-0.234755	-0.413009	0.124292	-1.88873	0.0589278	0.848384
OIP5	5.45291	-0.199576	-0.760672	0.109822	-1.81727	0.0691765	0.848384
OLAH	9.08539	0.238807	0.468267	0.125343	1.90523	0.0567497	0.848384
OPRD1	18.2117	-0.185359	-0.228139	0.0979716	-1.89196	0.0584958	0.848384
OXSR1	375.686	-0.183188	-0.229257	0.100585	-1.82123	0.068572	0.848384
PADI2	1348.94	0.222429	0.34103	0.119309	1.86431	0.0622778	0.848384
PAFAH1B3	114.785	0.200429	0.265712	0.107868	1.8581	0.0631554	0.848384
PDZD2	8.77446	0.187678	0.956339	0.101765	1.84422	0.0651506	0.848384
PFKFB4	612.567	-0.173163	-0.2072	0.0929887	-1.86219	0.0625759	0.848384
PGBD2	166.095	-0.222314	-0.36146	0.122148	-1.82004	0.0687524	0.848384
PINLYP	7.94449	0.171532	1.21235	0.0906441	1.89236	0.0584424	0.848384
PKD1L2	6.42667	0.229145	0.37758	0.122291	1.87376	0.0609637	0.848384
PLXNA3	58.5556	0.179268	0.217244	0.095161	1.88384	0.059587	0.848384
POC5	107.419	-0.23011	-0.468339	0.125367	-1.83548	0.0664339	0.848384
POFUT1	427.559	-0.182575	-0.223737	0.0972538	-1.8773	0.0604767	0.848384
PPP1R15B	984.484	0.172897	0.206219	0.0922478	1.87427	0.0608932	0.848384
PPP2R3C	1168.18	-0.171958	-0.20392	0.0912361	-1.88476	0.0594625	0.848384
PPP4R1L	124.612	-0.21779	-0.332193	0.119291	-1.8257	0.0678957	0.848384
PQBP1	415.241	0.136059	0.150754	0.0743574	1.8298	0.0672795	0.848384
PRCC	683.206	-0.147928	-0.167603	0.080767	-1.83154	0.0670201	0.848384
PRELID1	2672.79	-0.105105	-0.111153	0.0568979	-1.84726	0.0647099	0.848384
PROSC	1526.46	-0.130093	-0.1414	0.0680465	-1.91183	0.0558983	0.848384
PSMD12	850.677	-0.147323	-0.165343	0.0781831	-1.88434	0.0595193	0.848384
PSMD7	1205.87	-0.0976881	-0.102206	0.0515585	-1.89471	0.0581314	0.848384
PTGER4P2-CDK2AP2P2	12.5554	0.235806	0.568194	0.123862	1.90377	0.0569398	0.848384
PTPN11	866.254	-0.146741	-0.16482	0.0784089	-1.87148	0.0612782	0.848384
PURA	179.318	0.214257	0.303074	0.114025	1.87903	0.0602402	0.848384
PUS7	62.5496	-0.228173	-0.499965	0.124853	-1.82754	0.0676193	0.848384
QTRT2	336.619	-0.190807	-0.246631	0.105052	-1.81632	0.0693215	0.848384
RAB11B	1171.17	0.11271	0.119796	0.0591543	1.90535	0.0567345	0.848384
RAB18	2328.68	-0.136996	-0.151697	0.0742215	-1.84577	0.0649256	0.848384
RASA4B	19.233	-0.223261	-0.369158	0.122737	-1.81903	0.068907	0.848384
RFC2	618.89	-0.149543	-0.168262	0.0788934	-1.89551	0.0580254	0.848384
RFXANK	263.606	0.153205	0.176172	0.0844026	1.81517	0.0694975	0.848384
RHOH	11.5349	0.215256	0.648932	0.118704	1.81339	0.0697724	0.848384
RN7SL199P	15.408	0.234792	0.423583	0.124583	1.88462	0.059481	0.848384
RNASE3	61.9988	0.232645	0.456596	0.125356	1.85587	0.0634715	0.848384
RNF14	499.317	-0.18277	-0.228849	0.100651	-1.81587	0.0693901	0.848384
RNPC3	752.568	0.171335	0.202892	0.090835	1.88622	0.0592656	0.848384
RP1-111C20.4	58.4942	-0.232591	-0.45301	0.125374	-1.85518	0.06357	0.848384
RP1-68D18.2	7.04454	0.206805	0.878562	0.108122	1.9127	0.055786	0.848384
RP11-126O1.5	9.63136	-0.155471	-1.26025	0.0819135	-1.89799	0.057697	0.848384
RP11-147L13.2	31.9028	-0.218007	-0.323498	0.117726	-1.85181	0.0640532	0.848384
RP11-169K16.8	18.4825	0.188729	0.241672	0.103634	1.82111	0.0685901	0.848384
RP11-174G6.5	46.5259	-0.16691	-0.198188	0.0915108	-1.82394	0.068161	0.848384
RP11-177N22.3	9.85078	-0.207468	-0.293642	0.114235	-1.81616	0.0693463	0.848384
RP11-182N22.9	31.4959	0.215896	0.3096	0.115053	1.87649	0.0605886	0.848384
RP11-194N12.2	9.24019	0.233925	0.490723	0.125321	1.86661	0.0619555	0.848384
RP11-196G11.5	26.5656	0.22816	0.408223	0.124421	1.83377	0.0666875	0.848384
RP11-1H8.5	20.5819	0.213912	0.295202	0.111845	1.91257	0.055803	0.848384
RP11-208N14.5	14.5791	0.189841	0.241495	0.102808	1.84656	0.0648115	0.848384
RP11-286E11.1	28.0795	0.236216	0.519689	0.124994	1.88982	0.0587822	0.848384
RP11-286E11.2	15.9909	0.188934	0.24284	0.104109	1.81478	0.0695585	0.848384
RP11-290D2.6	18.965	-0.228602	-0.433818	0.125252	-1.82514	0.0679799	0.848384
RP11-323I15.2	12.6305	-0.191147	-0.245029	0.103991	-1.83811	0.0660458	0.848384
RP11-32K4.1	5.37654	-0.228107	-0.43894	0.125324	-1.82015	0.0687369	0.848384
RP11-344N10.5	29.9101	0.198538	0.266053	0.108971	1.82194	0.0684647	0.848384
RP11-34P13.9	4.54359	0.214758	0.757954	0.11409	1.88237	0.0597864	0.848384
[truncated: 36,473 more rows]

## Sheet: cMo-IFNpos-vs-IFNneg
Supplemental Table S3. The combined analysis results of differentially expressed genes (DEGs) and differentially connected genes (DEGs) between IFNpos and IFNneg in classical monocytes (related to Figure 2C).
[truncated: 38,031 more rows]
