# Supplementary material for: Multi–cell type gene coexpression network analysis reveals coordinated interferon response and cross–cell type correlations in systemic lupus erythematosus
Source: HighWire-hosted journal article supplement (doi:10.1101/gr.265249.120), 2021-03-05
Supplement: Supplemental_Table_S3.xlsx [file Supplemental_Table_S3.xlsx]

## Sheet: info
Supplemental Table S3. The combined analysis results of differentially expressed genes (DEGs) and differentially connected genes (DEGs) between IFNpos and IFNneg in classical monocytes (related to Figure 2C).
Column_name	Description
gene	gene name
gene_id	Ensembl gene id
gene_type	type of gene: coding/noncoding/anti-sense etc.
chr	chromosome number
start	gene start site on chromosome
end	gene end site on chromosome
strand	DNA strand + or -
location	sub-cellular location of protein (eg. mitochondria)
IFN	gene related to IFN or not (non-IFN)
eQTL-Trait	R24-based eQTL Trait (eg. Schizophrenia)
eQTL-Category	R24-based eQTL Category (eg. Mental Disorders)
all_mean	Mean TPM Epression from all samples
hc_mean	Mean TPM Epression from healthy samples
pos_mean	Mean TPM Epression from IFN+ samples
neg_mean	Mean TPM Epression from IFN- samples
posColors	WGCNA-based module color in IFN+ network
negColors	WGCNA-based module color in IFN- network
K1	WGCNA-based gene connectivity in IFN+ network
K2	WGCNA-based gene connectivity in IFN- network
DiffK	WGCNA-based difference in gene connectivity between IFN+ and IFN- (K1-K2)
ttest	WGCN-based ttest statistics
baseMean	DESeq-based baseMean (normalized read counts)
log2FoldChange	DESeq-based log2FoldChange (IFN+ vs IFN-)
pvalue	DESeq-based P-value
padj	DESeq-based P-adjusted values
all_cor	Spearman correation between SLEDAI and gene expression (TPM) from all samples
pos_cor	Spearman correation between SLEDAI and gene expression (TPM) from IFN+ samples
neg_cor	Spearman correation between SLEDAI and gene expression (TPM) from IFN- samples
DEG	Significantly differentially expressed genes (padj < 0.05) as Y otherwise it's N
DCG	Significantly differentially connected genes (DiffK > 0.25 or < -0.25) as Y otherwise it's N
DEG+DCG	Significantly differentially expressed (padj < 0.05) and connected genes (DiffK > 0.25 or < -0.25) as Y otherwise it's N
DEG+DCG+TPM10+nonIFN	Significantly differentially expressed (padj < 0.05) and connected genes (DiffK > 0.25 or < -0.25) and highly expressed (average TPM > 10) and non-IFN as Y otherwise it's N

## Sheet: cMo
gene	gene_id	gene_type	chr	start	end	strand	location	IFN	eQTL-Trait	eQTL-Category	all_mean	hc_mean	pos_mean	neg_mean	posColors	negColors	K1	K2	DiffK	ttest	baseMean	log2FoldChange	pvalue	padj	all_cor	pos_cor	neg_cor	DEG	DCG	DEG+DCG	DEG+DCG+TPM10+nonIFN
A1BG	ENSG00000121410.11	protein_coding	chr19	58345178	58353499	-		non-IFN			3.49601	4.01869	2.79975	3.7414	yellow	black	0.141175	0.0914372	0.0497377	2.91014	86.2044	-0.390515	0.00531221	0.0692413	-0.221336	-0.0923179	-0.17746	N	N	N	N
A1BG-AS1	ENSG00000268895.5	antisense	chr19	58347751	58355183	+		non-IFN			1.23201	1.04263	1.24438	1.35478	darkgrey	grey	0.12076	0.014518	0.106242	0.548434	27.2946	-0.100055	0.574601	0.872909	-0.187723	-0.306675	-0.0498134	N	N	N	N
AAAS	ENSG00000094914.12	protein_coding	chr12	53307456	53324864	-	Centrosome;Cytosol;Nuclear membrane	non-IFN			17.293	17.7268	16.613	17.5868	salmon	pink	0.228931	0.181997	0.046934	0.776578	473.77	-0.0902254	0.342598	0.733835	-0.151567	-0.0222914	-0.187665	N	N	N	N
AACS	ENSG00000081760.16	protein_coding	chr12	125065379	125143333	+	Vesicles	non-IFN			2.04576	2.04921	1.94103	2.13573	grey	turquoise	0.0695057	0.0423482	0.0271575	0.573549	106.823	-0.0847865	0.65867	0.903067	-0.0923578	-0.0155364	-0.0475649	N	N	N	N
AAED1	ENSG00000158122.11	protein_coding	chr9	96639577	96655303	-		non-IFN			15.4905	14.9013	15.9909	15.4649	lightgreen	lightyellow	0.200826	0.0868416	0.113985	-0.475644	717.108	0.0196961	0.842755	0.959804	0.119982	0.277404	-0.0432408	N	N	N	N
AAGAB	ENSG00000103591.12	protein_coding	chr15	67201033	67255195	-	Nuclear speckles	non-IFN			22.7105	21.7987	23.5307	22.6305	turquoise	turquoise	0.103021	0.231516	-0.128495	-0.660158	702.981	0.0784255	0.292887	0.695848	-0.013861	0.0887152	-0.211707	N	N	N	N
AAK1	ENSG00000115977.18	protein_coding	chr2	69457997	69674349	-		non-IFN			3.07882	2.86067	3.02938	3.27642	grey	blue	0.0976249	0.110972	-0.0133475	1.10927	204.686	-0.054213	0.602295	0.882269	0.25451	0.230569	0.379135	N	N	N	N
AAMDC	ENSG00000087884.14	protein_coding	chr11	77821109	77918432	+	Cytosol;Nucleoplasm	non-IFN			17.6789	16.4153	17.0143	19.1573	grey	grey	0.069389	0.0284147	0.0409743	1.49913	79.7367	-0.201906	0.053034	0.316459	-0.00733387	-0.0567417	0.136122	N	N	N	N
AAMP	ENSG00000127837.9	protein_coding	chr2	218264123	218270257	-		non-IFN			44.8075	43.3418	46.1606	44.6482	darkred	turquoise	0.171988	0.291469	-0.11948	-0.72233	1266.66	0.0428411	0.476506	0.822642	0.0642447	0.277629	-0.206345	N	N	N	N
AAR2	ENSG00000131043.11	protein_coding	chr20	36236459	36270918	+	Cytosol	non-IFN			16.5773	16.5271	17.267	16.004	turquoise	turquoise	0.232966	0.405604	-0.172637	-1.06931	620.244	0.112105	0.199081	0.594479	-0.131839	-0.095245	-0.309777	N	N	N	N
AARS	ENSG00000090861.15	protein_coding	chr16	70252295	70289543	-		non-IFN			5.32569	5.38707	5.76863	4.89152	grey	turquoise	0.118044	0.078315	0.0397294	-1.56914	291.075	0.207675	0.12556	0.487265	-0.0154989	0.17	-0.24284	N	N	N	N
AARS2	ENSG00000124608.4	protein_coding	chr6	44299654	44313326	-		non-IFN			2.40288	2.44908	2.30751	2.45444	green	turquoise	0.0881588	0.167485	-0.0793263	0.531958	141.705	-0.0632974	0.634664	0.894913	0.0316823	0.230569	-0.102913	N	N	N	N
AASDH	ENSG00000157426.13	protein_coding	chr4	56338287	56387508	-		non-IFN			2.55048	2.61343	2.64104	2.42615	grey	yellow	0.102277	0.0464255	0.0558517	-0.628773	138.68	0.0722875	0.68907	0.911835	-0.0264753	-0.228318	0.070742	N	N	N	N
AASDHPPT	ENSG00000149313.10	protein_coding	chr11	106075501	106098710	+		non-IFN			12.5613	13.228	12.4552	12.1843	blue	yellow	0.410481	0.147846	0.262634	-0.258116	497.524	0.0181243	0.86812	0.967257	-0.141837	-0.0421059	-0.303377	N	Y	N	N
AATBC	ENSG00000215458.8	antisense	chr21	43805758	43812567	-		non-IFN			4.72204	4.79328	4.31794	5.02831	grey	yellow	0.198876	0.0740913	0.124784	1.2563	221.07	-0.196042	0.222888	0.628439	-0.0387473	-0.118887	0.138544	N	N	N	N
AATF	ENSG00000275700.4	protein_coding	chr17	36948875	37056871	+		non-IFN			38.0873	38.3777	40.0135	36.1827	grey	brown	0.18743	0.298643	-0.111213	-1.92114	1235.47	0.131469	0.0575987	0.329915	0.0762967	0.375576	-0.358553	N	N	N	N
AB019441.29	ENSG00000225200.2	processed_pseudogene	chr14	105978520	105979146	-		non-IFN			10.2942	10.9176	9.00763	10.9894	darkgrey	brown	0.179445	0.557323	-0.377878	3.42777	73.0222	-0.316596	0.00136083	0.0244234	-0.0512148	0.0907417	0.0908057	Y	Y	Y	Y
ABALON	ENSG00000281376.1	antisense	chr20	31721507	31723409	+		non-IFN			4.39504	4.26659	4.67449	4.23914	darkorange	turquoise	0.196411	0.109311	0.0870994	-0.915302	15.8212	-0.0937905	0.592776	0.878954	-0.0790591	0.0344503	-0.20721	N	N	N	N
ABAT	ENSG00000183044.11	protein_coding	chr16	8674565	8784575	+		non-IFN			1.67974	1.70851	1.78772	1.56415	greenyellow	grey	0.122749	0.0313767	0.0913725	-0.892814	112.891	-0.0271485	0.873296	0.969165	0.117562	0.198146	0.023696	N	N	N	N
ABC13-47656900H15.1	ENSG00000283566.1	protein_coding	chr17	21772755	21783465	-		non-IFN			6.82844	6.42535	7.08599	6.88574	yellow	blue	0.238832	0.0836438	0.155188	-0.513028	144.915	0.0334138	0.683267	0.910582	0.0956581	0.227867	0.00345926	N	N	N	N
ABCA1	ENSG00000165029.15	protein_coding	chr9	104781002	104928237	-	Nucleoplasm;Vesicles	IFN			1.3976	1.14311	1.62629	1.37546	black	green	0.143467	0.0540453	0.0894217	-1.10921	219.399	0.165289	0.366473	0.753169	0.154622	0.0770066	0.177633	N	N	N	N
ABCA7	ENSG00000064687.12	protein_coding	chr19	1040101	1065572	+		non-IFN			3.26518	2.82561	3.45772	3.40557	midnightblue	grey60	0.161857	0.133241	0.028616	-0.148162	374.612	0.0172359	0.900413	0.976958	-0.0400674	-0.0866887	-0.0494675	N	N	N	N
ABCB10	ENSG00000135776.4	protein_coding	chr1	229516582	229558695	-		non-IFN			3.04066	3.05305	3.0374	3.03478	salmon	red	0.225342	0.0762321	0.14911	-0.00675829	188.031	-0.00939681	0.950123	0.989158	-0.0969048	-0.0594437	-0.110178	N	N	N	N
ABCB7	ENSG00000131269.15	protein_coding	chrX	75053172	75156732	-		non-IFN			10.4621	11.5282	9.01509	10.9864	grey	black	0.0868935	0.0918402	-0.00494677	2.77363	371.675	-0.272503	0.00570721	0.072399	-0.174839	0.0227417	-0.0653801	N	N	N	N
ABCB8	ENSG00000197150.12	protein_coding	chr7	151028422	151047782	+	Nucleus	non-IFN			3.64162	3.63156	3.74278	3.55945	purple	turquoise	0.142146	0.0452376	0.0969086	-0.387005	134.099	0.0782919	0.610084	0.886007	-0.131839	0.0335497	-0.234019	N	N	N	N
ABCC1	ENSG00000103222.18	protein_coding	chr16	15949577	16143074	+		non-IFN			1.45	1.42664	1.33759	1.56568	turquoise	turquoise	0.545613	0.0608796	0.484733	1.09555	159.791	-0.174866	0.233819	0.638066	-0.143793	0.059894	-0.133528	N	Y	N	N
ABCC10	ENSG00000124574.14	protein_coding	chr6	43427366	43450430	+		non-IFN			2.91047	2.73141	3.31041	2.68397	turquoise	turquoise	0.746714	0.0748654	0.671849	-1.53678	242.931	0.265027	0.0616716	0.341379	-0.0688161	-0.206252	-0.0795631	N	Y	N	N
ABCC3	ENSG00000108846.15	protein_coding	chr17	50634777	50692252	+	Plasma membrane	non-IFN			5.46884	5.96816	4.82599	5.68359	brown	turquoise	0.129036	0.123297	0.00573968	1.05864	238.938	-0.125807	0.497881	0.836689	-0.363075	-0.21053	-0.414074	N	N	N	N
ABCC5	ENSG00000114770.16	protein_coding	chr3	183919934	184018015	-	Cell Junctions;Nucleus	non-IFN	Anterior Chamber	Anatomy Category	5.73523	5.61858	5.1214	6.35919	brown	blue	0.1617	0.0560371	0.105663	1.77962	323.327	-0.188087	0.229406	0.634663	-0.158974	0.181934	-0.296805	N	N	N	N
ABCC6	ENSG00000091262.14	protein_coding	chr16	16148928	16223522	-		non-IFN			4.11596	4.6276	3.06749	4.67992	darkred	blue	0.122205	0.0438849	0.0783202	3.54204	83.2301	-0.526685	0.000904834	0.018197	-0.128587	-0.223589	0.181265	Y	N	N	N
ABCC6P1	ENSG00000256340.8	transcribed_unprocessed_pseudogene	chr16	18571162	18598328	+		non-IFN			1.90446	2.08864	1.46638	2.16099	lightgreen	blue	0.140539	0.0669577	0.0735811	2.77471	20.1898	-0.433298	0.0126352	0.128666	-0.0226128	0.0209404	0.117615	N	N	N	N
ABCC6P2	ENSG00000255277.3	transcribed_unprocessed_pseudogene	chr16	14820792	14824702	-		non-IFN			1.60272	1.80752	1.21616	1.79923	grey	blue	0.0848387	0.0716448	0.0131939	2.73415	13.1313	-0.447592	0.0133492	0.133628	-0.0217816	0.00562914	0.165353	N	N	N	N
ABCC9	ENSG00000069431.11	protein_coding	chr12	21797401	21942529	-	Cytosol;Nucleoplasm	non-IFN			1.38462	1.25844	1.49236	1.37863	lightcyan	green	0.197785	0.103166	0.0946197	-1.50312	195.088	0.0836132	0.288879	0.692718	0.326088	0.0828609	0.567319	N	N	N	N
ABCD1	ENSG00000101986.11	protein_coding	chrX	153724868	153744762	+		non-IFN			8.51527	8.17631	9.69138	7.7168	green	turquoise	0.105039	0.122513	-0.0174741	-3.50616	473.228	0.289531	0.00257489	0.0400442	0.0264508	0.132622	-0.323787	Y	N	N	N
ABCD3	ENSG00000117528.11	protein_coding	chr1	94418455	94518666	+		non-IFN			6.27716	6.90158	6.1278	5.96819	black	grey	0.135667	0.0260588	0.109608	-0.279214	257.64	0.0212137	0.863068	0.965648	-0.0525594	-0.0891655	-0.104124	N	N	N	N
ABCD4	ENSG00000119688.20	protein_coding	chr14	74285423	74303056	-		non-IFN			8.1047	7.76708	7.87708	8.54387	brown	blue	0.127821	0.0728898	0.0549315	1.12675	378.779	-0.0818736	0.495838	0.835679	-0.328386	-0.461139	-0.17158	N	N	N	N
ABCE1	ENSG00000164163.10	protein_coding	chr4	145097932	145129179	+		non-IFN			8.76829	10.0537	7.59303	8.89797	yellow	blue	0.215933	0.0450824	0.170851	1.88944	505.421	-0.228095	0.0531391	0.316742	-0.251552	-0.246331	-0.111907	N	N	N	N
ABCF1	ENSG00000204574.12	protein_coding	chr6	30571376	30597179	+		non-IFN			9.20486	9.31866	9.94062	8.47534	turquoise	turquoise	0.431217	0.126003	0.305214	-2.31341	481.302	0.192805	0.0121674	0.125932	0.176991	0.219987	-0.0480838	N	Y	N	N
ABCF2	ENSG00000033050.7	protein_coding	chr7	151207837	151227230	-		non-IFN			15.1535	15.3242	15.3363	14.8718	blue	turquoise	0.220557	0.149541	0.0710161	-0.382378	663.322	0.0362782	0.746959	0.932354	-0.2086	-0.286861	-0.261347	N	N	N	N
ABCF3	ENSG00000161204.11	protein_coding	chr3	184186023	184194012	+	Cytosol;Nucleoli	non-IFN			12.9803	13.158	14.3284	11.6653	blue	pink	0.468307	0.18415	0.284157	-2.1498	516.389	0.25515	0.0187741	0.167036	0.0571308	0.0441324	-0.0181611	N	Y	N	N
ABCG1	ENSG00000160179.18	protein_coding	chr21	42199689	42297244	+		non-IFN			2.50395	2.30205	2.43214	2.70982	greenyellow	turquoise	0.102879	0.072136	0.0307433	0.545196	119.507	-0.085109	0.678031	0.908995	-0.0610422	-0.118212	0.0959946	N	N	N	N
ABHD10	ENSG00000144827.8	protein_coding	chr3	111979010	111993363	+	Mitochondria	non-IFN			13.0996	14.0376	14.4726	11.226	turquoise	red	0.198498	0.0398602	0.158638	-2.73173	392.028	0.340436	0.00110645	0.0210923	-0.105217	-0.342477	-0.105335	Y	N	N	N
ABHD11	ENSG00000106077.18	protein_coding	chr7	73736094	73738867	-		non-IFN			14.9053	13.6695	15.6624	15.1097	turquoise	turquoise	0.116423	0.045646	0.0707771	-0.433547	290.601	0.0292696	0.780917	0.942044	-0.144795	-0.0117086	-0.384843	N	N	N	N
ABHD12	ENSG00000100997.18	protein_coding	chr20	25294743	25390983	-		non-IFN			23.0579	21.6981	23.7579	23.4001	brown	turquoise	0.276489	0.200158	0.076331	-0.26359	744.718	0.00158885	0.981096	0.995224	-0.122133	0.0344503	-0.310815	N	N	N	N
ABHD12B	ENSG00000131969.14	protein_coding	chr14	50872160	50904970	+		non-IFN			0.808752	0.880913	0.638548	0.907994	blue	pink	0.0986203	0.0655957	0.0330246	1.50046	21.5048	-0.269963	0.182817	0.572338	0.0647291	-0.000226047	0.211259	N	N	N	N
ABHD13	ENSG00000139826.5	protein_coding	chr13	108218379	108234255	+	Cytosol	non-IFN			8.91676	8.63403	8.68825	9.31797	grey	brown	0.147884	0.156186	-0.00830183	0.872361	777.646	-0.0966896	0.383818	0.766204	0.103236	0.307576	-0.0586345	N	N	N	N
ABHD14A	ENSG00000248487.8	protein_coding	chr3	51971426	51981199	+		non-IFN			11.3847	12.5628	10.8644	11.0122	grey	magenta	0.0962509	0.0195949	0.076656	0.126824	84.9376	-0.024988	0.851416	0.962975	0.0475479	-0.0632715	0.12142	N	N	N	N
ABHD14B	ENSG00000114779.19	protein_coding	chr3	51968510	51983409	-		non-IFN			16.5368	16.7303	15.132	17.6396	darkolivegreen	grey	0.139362	0.0203014	0.119061	2.22504	356.654	-0.234468	0.0135917	0.135254	-0.050017	0.087139	-0.100492	N	N	N	N
ABHD15	ENSG00000168792.4	protein_coding	chr17	29560547	29567137	-	Cytosol;Nucleoplasm	non-IFN	Body Height	Body Weights and Measures;Diagnostic Techniques and Procedures;Physical Examination	1.57479	1.48512	1.59038	1.62432	turquoise	grey	0.107582	0.0151346	0.0924475	0.173091	87.9824	-0.0530217	0.739353	0.9299	0.0581576	-0.0310728	0.234538	N	N	N	N
ABHD16A	ENSG00000204427.11	protein_coding	chr6	31686949	31703444	-		non-IFN			40.763	37.7074	45.051	39.1365	midnightblue	turquoise	0.275079	0.599295	-0.324215	-2.7236	49.5219	0.18719	0.0699263	0.368633	0.0592577	0.0247682	-0.110523	N	Y	N	N
ABHD17A	ENSG00000129968.15	protein_coding	chr19	1876810	1885547	-	Vesicles	non-IFN			14.0237	12.8807	14.5487	14.3673	purple	turquoise	0.133591	0.0806527	0.0529385	-0.21152	292.722	-0.0163784	0.834249	0.957201	-0.066396	-0.0281457	-0.17452	N	N	N	N
ABHD17AP1	ENSG00000198658.4	unprocessed_pseudogene	chr1	148146395	148149566	+		non-IFN			4.40065	4.01608	4.44565	4.63242	purple	turquoise	0.107537	0.0613976	0.0461396	0.580835	55.8018	-0.0733145	0.443681	0.802901	-0.254167	-0.243179	-0.309431	N	N	N	N
ABHD17AP3	ENSG00000250536.1	unprocessed_pseudogene	chr1	214605470	214608840	-		non-IFN			2.49486	2.35173	2.5316	2.56347	purple	turquoise	0.0949084	0.0610838	0.0338246	0.188701	40.018	-0.0265873	0.77403	0.940315	-0.220798	-0.188914	-0.325171	N	N	N	N
ABHD17AP4	ENSG00000229107.2	processed_pseudogene	chr22	20667836	20670984	-		non-IFN			2.82783	2.70705	2.96258	2.7942	grey	turquoise	0.0901598	0.0586649	0.031495	-0.781561	34.14	0.0637954	0.537668	0.856992	-0.0495036	-0.0193642	-0.180574	N	N	N	N
ABHD17AP5	ENSG00000263366.2	processed_pseudogene	chr22	22114844	22118005	-		non-IFN			3.57714	3.34352	3.67255	3.65787	purple	turquoise	0.159677	0.0575207	0.102156	-0.054069	44.3944	-0.00645935	0.946752	0.988066	0.0219772	0.131497	-0.159472	N	N	N	N
ABHD17AP6	ENSG00000226981.2	unprocessed_pseudogene	chr17	20814620	20844257	+		non-IFN			2.4283	2.26431	2.3669	2.59824	purple	turquoise	0.123329	0.0496446	0.0736841	1.33005	35.1652	-0.132191	0.172369	0.559014	-0.174839	0.000450331	-0.307875	N	N	N	N
ABHD17B	ENSG00000107362.13	protein_coding	chr9	71862452	71910931	-		non-IFN			4.32963	4.2474	4.74132	4.02441	grey	yellow	0.0842213	0.114332	-0.0301105	-1.27772	152.511	0.230229	0.116721	0.471932	0.0302889	0.117987	-0.12782	N	N	N	N
ABHD18	ENSG00000164074.14	protein_coding	chr4	127965306	128039711	+	Nuclear membrane	non-IFN			4.93159	5.20801	4.54486	5.07771	grey	red	0.0930583	0.0462493	0.046809	1.072	198.578	-0.0666657	0.546621	0.862259	-0.144966	-0.100424	-0.110178	N	N	N	N
ABHD2	ENSG00000140526.17	protein_coding	chr15	89087459	89202360	+	Cytosol;Nucleoplasm	non-IFN			9.62077	9.25938	9.2229	10.2269	grey	turquoise	0.128804	0.105299	0.0235056	1.2535	945.786	-0.140745	0.144798	0.518237	-0.244389	-0.0632715	-0.216896	N	N	N	N
ABHD3	ENSG00000158201.9	protein_coding	chr18	21650897	21704805	-	Nucleus;Plasma membrane;Vesicles	non-IFN			39.6285	37.1376	41.9009	39.3818	grey	grey60	0.143499	0.361536	-0.218037	-0.863274	1249.15	0.0862257	0.369822	0.755919	-0.0526816	-0.132848	-0.0849249	N	N	N	N
ABHD4	ENSG00000100439.10	protein_coding	chr14	22598237	22613215	+	Nucleus	non-IFN			5.39658	5.68059	4.93265	5.60547	white	turquoise	0.0924644	0.135458	-0.0429938	1.1955	269.383	-0.177826	0.215383	0.617346	-0.0767612	0.0983973	-0.0925353	N	N	N	N
ABHD5	ENSG00000011198.7	protein_coding	chr3	43690113	43734371	+	Vesicles	non-IFN			12.7857	13.0885	12.591	12.7438	lightgreen	blue	0.247614	0.0578344	0.18978	0.133017	327.599	-0.0235025	0.86752	0.966977	0.120593	0.285735	-0.023523	N	N	N	N
ABHD6	ENSG00000163686.14	protein_coding	chr3	58237506	58295693	+	Nucleoplasm;Vesicles	non-IFN	Cholesterol	Chemicals and Drugs Category	6.17017	5.71619	5.8863	6.7411	yellow	turquoise	0.158233	0.0449074	0.113326	1.39039	240.431	-0.190632	0.153054	0.530223	-0.136288	-0.096596	-0.117096	N	N	N	N
ABHD8	ENSG00000127220.5	protein_coding	chr19	17292131	17310236	-	Nuclear bodies;Nucleoplasm	non-IFN			8.5289	8.94801	8.16087	8.55779	brown	turquoise	0.0879569	0.222941	-0.134984	0.670945	251.75	-0.0728412	0.446785	0.804915	-0.162592	0.0900662	-0.341602	N	N	N	N
ABI1	ENSG00000136754.16	protein_coding	chr10	26746593	26861087	-		non-IFN			52.7732	52.3674	53.1481	52.7288	red	blue	0.365527	0.445452	-0.079925	-0.128099	2072.23	0.0372391	0.586027	0.87666	-0.120789	0.152212	-0.348175	N	N	N	N
ABI2	ENSG00000138443.15	protein_coding	chr2	203328219	203447723	+	Nucleoplasm	non-IFN			2.3422	2.29992	2.65158	2.09907	brown	turquoise	0.199563	0.0485932	0.15097	-1.37533	146.364	-0.0689175	0.628985	0.893003	0.06158	0.157841	-0.0534456	N	N	N	N
ABI3	ENSG00000108798.8	protein_coding	chr17	49210227	49223225	+		non-IFN			36.3257	36.5208	42.6935	30.5694	yellow	yellow	0.250286	0.0875175	0.162769	-3.67731	1098.78	0.40928	0.000208484	0.00566136	0.114873	0.0481854	0.0112426	Y	N	N	N
ABL1	ENSG00000097007.17	protein_coding	chr9	130713946	130887675	+		non-IFN			1.56595	1.50332	1.7369	1.45932	grey	blue	0.0746543	0.0454071	0.0292472	-1.45627	131.062	0.231586	0.121284	0.480308	0.119615	0.212781	-0.135084	N	N	N	N
ABR	ENSG00000159842.14	protein_coding	chr17	1003518	1229021	-	Cytosol;Nucleoplasm	non-IFN			10.5347	10.2966	11.3799	9.9571	blue	turquoise	0.301328	0.198819	0.102509	-1.96828	789.007	0.205953	0.0199792	0.173611	-0.0624112	-0.228993	-0.101011	N	N	N	N
ABRACL	ENSG00000146386.7	protein_coding	chr6	139028682	139043302	+	Cytosol;Nucleoplasm	non-IFN			106.054	103.008	112.599	102.429	blue	red	0.133729	0.0446221	0.0891065	-1.63056	1170.01	0.0989265	0.258846	0.663663	-0.0550285	-0.418808	0.119518	N	N	N	N
ABT1	ENSG00000146109.4	protein_coding	chr6	26596952	26600744	+	Vesicles	non-IFN			15.9302	15.309	16.6219	15.7585	turquoise	grey	0.185144	0.0479355	0.137209	-0.90603	745.716	0.0571156	0.457678	0.811227	-0.0231506	-0.0276954	-0.125052	N	N	N	N
ABTB1	ENSG00000114626.17	protein_coding	chr3	127672935	127680920	+	Nucleoli	non-IFN			61.7036	63.229	55.198	66.3671	grey	turquoise	0.137964	0.0891529	0.0488115	2.98894	1846.98	-0.265094	0.00108629	0.0208031	-0.321443	-0.164146	-0.238343	Y	N	N	N
AC000068.9	ENSG00000273300.1	antisense	chr22	19454179	19454605	+		non-IFN			1.30402	0.984733	1.32111	1.51432	grey	pink	0.064907	0.0534912	0.0114158	0.515936	6.04696	-0.0873897	0.672833	0.9076	-0.074856	0.112611	-0.130804	N	N	N	N
AC000089.3	ENSG00000235776.2	processed_pseudogene	chr22	19792294	19793094	+		non-IFN			8.27125	8.93606	7.24946	8.70354	magenta	brown	0.18237	0.191291	-0.0089211	3.63505	81.388	-0.283292	0.000613036	0.0137177	-0.175793	-0.266146	0.205999	Y	N	N	N
AC002044.1	ENSG00000279591.1	TEC	chr16	73015047	73016016	-		non-IFN			1.03302	0.967821	1.15802	0.968742	royalblue	grey	0.0990826	0.0347514	0.0643312	-0.757381	13.9907	0.140244	0.497231	0.836186	0.156866	0.0783663	0.149107	N	N	N	N
AC002044.3	ENSG00000280092.1	TEC	chr16	73005601	73006141	-		non-IFN			0.996968	1.05801	0.882162	1.05518	grey	green	0.0563351	0.0569356	-0.000600516	1.09518	5.99875	-0.156657	0.3918	0.77133	0.0517771	-0.0137351	0.188357	N	N	N	N
AC002044.4	ENSG00000272330.1	sense_intronic	chr16	73014319	73014476	-		non-IFN			53.9254	52.684	57.7125	51.4601	greenyellow	grey	0.074311	0.0203221	0.0539889	-1.22298	13.1012	0.0877799	0.510801	0.843969	0.0314623	0.101324	-0.130933	N	N	N	N
AC002056.3	ENSG00000213683.4	processed_pseudogene	chr22	50754675	50755434	-		non-IFN			4.6085	4.56657	4.57757	4.66538	turquoise	blue	0.128049	0.0620201	0.0660286	0.250297	43.2548	-0.028166	0.776954	0.941473	-0.0289199	-0.131722	0.0883842	N	N	N	N
AC002075.4	ENSG00000237729.2	processed_pseudogene	chr7	93669826	93670077	-		non-IFN			240.778	235.91	233.039	251.043	violet	brown	0.251866	0.533931	-0.282065	1.84023	254.055	-0.144734	0.0625511	0.344378	0.0601866	0.0711523	0.185935	N	Y	N	N
AC002116.8	ENSG00000248101.2	processed_transcript	chr19	36008638	36014235	-		non-IFN			4.83037	4.61463	4.89594	4.92479	darkred	green	0.0780361	0.0531215	0.0249147	0.0582785	22.7549	0.0639255	0.662791	0.90511	0.0305822	-0.129695	0.246127	N	N	N	N
AC002310.12	ENSG00000235560.3	antisense	chr16	30534752	30537144	+		non-IFN			1.50369	1.68393	1.30716	1.54988	grey	grey	0.0751289	0.0388337	0.0362952	1.17645	21.1321	-0.19386	0.24466	0.648574	-0.128318	-0.133748	-0.0145289	N	N	N	N
AC002398.13	ENSG00000267049.1	antisense	chr19	35769144	35771028	-		non-IFN			1.57826	1.14319	1.59537	1.87026	grey	purple	0.117686	0.0167575	0.100928	0.945228	6.47185	-0.115557	0.529537	0.853109	-0.0237865	0.134101	-0.163104	N	N	N	N
AC002451.3	ENSG00000231170.5	antisense	chr7	95596682	95613719	+		non-IFN			1.24625	1.3022	1.19642	1.25074	grey	blue	0.0866646	0.0235243	0.0631403	0.156871	13.2091	-0.050862	0.805864	0.950606	-0.114745	-0.169483	0.0175572	N	N	N	N
AC002467.7	ENSG00000241764.3	antisense	chr7	107742817	107744581	-		non-IFN			2.58738	3.07187	2.1713	2.61251	grey60	turquoise	0.161601	0.0507372	0.110864	1.03034	19.3389	-0.17829	0.375222	0.760374	-0.159868	-0.208292	-0.0314898	N	N	N	N
AC003075.4	ENSG00000237773.5	antisense	chr7	17279834	17299357	-		non-IFN			3.60848	3.81262	2.84632	4.13687	brown	grey	0.171869	0.0219333	0.149936	2.93583	16.8886	-0.402925	0.0115725	0.121399	-0.0298733	0.0065298	0.200118	N	N	N	N
AC003991.3	ENSG00000228113.7	antisense	chr7	88219359	88304367	+		non-IFN			3.615	3.52541	3.44193	3.83096	grey	green	0.0886801	0.0489295	0.0397506	1.53705	36.8701	-0.118804	0.22792	0.63419	0.0181147	0.10155	0.0465271	N	N	N	N
AC004057.1	ENSG00000196656.7	transcribed_processed_pseudogene	chr4	113214046	113217170	-		non-IFN			55.5958	55.6584	55.9335	55.2536	grey	black	0.121269	0.318585	-0.197317	-0.258483	134.946	-0.0213144	0.8039	0.950056	0.140248	-0.175629	0.352845	N	N	N	N
AC004069.2	ENSG00000251259.1	lincRNA	chr4	105137280	105140619	-		non-IFN			17.5435	18.4636	16.5121	17.8042	green	turquoise	0.121051	0.052487	0.068564	1.85169	103.611	-0.120935	0.0910666	0.420641	-0.191561	-0.405298	0.160683	N	N	N	N
AC004076.7	ENSG00000268533.1	protein_coding	chr19	57394183	57438457	+		non-IFN			2.39017	3.71394	1.1969	2.50864	turquoise	grey	0.268417	0.0240729	0.244344	3.16655	10.1514	-0.636771	0.00168316	0.0285171	-0.299013	-0.381743	-0.0914975	Y	N	N	N
AC004158.1	ENSG00000280264.1	protein_coding	chr16	72496967	72497341	-		non-IFN			2.69673	2.18585	2.93638	2.84589	lightyellow	lightcyan	0.139	0.065483	0.0735174	-0.187762	8.43202	0.0135668	0.936773	0.986388	0.0401407	-0.269073	0.210842	N	N	N	N
AC004257.1	ENSG00000269635.1	lincRNA	chr19	15221015	15222297	-		non-IFN			5.5256	4.84206	6.07708	5.52151	greenyellow	grey	0.170122	0.0300964	0.140025	-0.847716	7.87627	0.0912214	0.517108	0.847622	0.205128	0.307576	0.124706	N	N	N	N
AC004453.8	ENSG00000146677.7	processed_pseudogene	chr7	44467897	44468304	+		non-IFN			30.6404	30.9375	28.4985	32.3206	violet	brown	0.143433	0.479574	-0.336141	2.43323	106.97	-0.215859	0.0164664	0.15317	0.0320246	-0.116185	0.273455	N	Y	N	N
AC004540.5	ENSG00000214870.8	lincRNA	chr7	26398593	26494256	+		non-IFN			0.600463	0.890634	0.465466	0.514751	grey	grey	0.0792977	0.0422961	0.0370016	0.310854	5.73197	-0.0230037	0.903698	0.978283	-0.0228805	-0.0762397	0.1457	N	N	N	N
AC004692.5	ENSG00000213717.3	processed_pseudogene	chr7	43274159	43274582	+		non-IFN			7.75973	8.02979	7.04865	8.19653	magenta	brown	0.0779991	0.0481645	0.0298346	2.57783	28.695	-0.225851	0.0160178	0.150068	-0.21102	-0.0493112	-0.0774875	N	N	N	N
AC004702.2	ENSG00000263494.1	lincRNA	chr17	20185082	20322973	+		non-IFN			12.1508	11.8978	11.962	12.4961	royalblue	midnightblue	0.12334	0.0237191	0.0996206	0.365285	5.4773	-0.0739723	0.63556	0.895085	-0.0535372	-0.0616953	0.0486027	N	N	N	N
AC004813.1	ENSG00000279777.1	protein_coding	chr12	119918001	119918375	+		non-IFN			10.4164	10.2768	10.738	10.2312	grey	blue	0.133345	0.104018	0.029327	-0.655611	30.5326	0.0357204	0.739779	0.9299	0.291888	0.195669	0.371352	N	N	N	N
AC004824.1	ENSG00000280226.1	protein_coding	chr1	17329012	17331796	-		non-IFN			38.9149	35.2227	39.844	40.7014	brown	grey	0.0825862	0.0549204	0.0276659	0.2664	16.3132	-0.0508271	0.664146	0.905279	0.261526	0.212331	0.338489	N	N	N	N
AC004893.11	ENSG00000242687.2	antisense	chr7	99013165	99048240	+		non-IFN			2.53512	3.08739	2.31823	2.33665	grey	yellow	0.126225	0.0538658	0.0723592	0.0722103	37.5288	0.143707	0.248676	0.652099	0.186574	0.158967	0.151343	N	N	N	N
AC004951.5	ENSG00000239556.3	transcribed_unprocessed_pseudogene	chr7	43984994	43990207	-		non-IFN			7.76459	8.91214	7.63455	7.06931	grey	green	0.150235	0.0685351	0.0816998	-0.798215	9.70373	-0.00935292	0.952421	0.989361	0.0784724	0.068	-0.0155667	N	N	N	N
AC004951.6	ENSG00000228434.1	lincRNA	chr7	44004046	44007866	-		non-IFN			6.13174	6.3111	5.60895	6.46643	grey	green	0.148413	0.0877521	0.0606605	1.29764	148.858	-0.217044	0.115927	0.471045	0.0604066	-0.19049	0.379481	N	N	N	N
AC004953.1	ENSG00000279538.1	protein_coding	chr7	101635218	101638685	+		non-IFN			3.00146	2.63211	3.12036	3.15727	steelblue	grey	0.150706	0.0200077	0.130698	0.091899	4.1369	-0.0460966	0.784221	0.942267	0.161076	0.159868	0.196313	N	N	N	N
AC004967.7	ENSG00000243554.1	unprocessed_pseudogene	chr7	97969005	97972254	-		non-IFN			15.5984	14.5166	16.66	15.4254	black	black	0.127001	0.0341824	0.0928181	-1.37841	104.523	0.101453	0.250732	0.654608	0.24786	0.363192	0.0902868	N	N	N	N
AC004980.10	ENSG00000214243.3	processed_pseudogene	chr7	76650401	76650897	-		non-IFN			1.82226	1.70178	1.78496	1.94022	grey	grey	0.0906177	0.0267539	0.0638638	0.572367	9.62328	-0.0966675	0.58076	0.874432	0.0107074	-0.202199	0.257888	N	N	N	N
AC004980.7	ENSG00000205485.13	transcribed_unprocessed_pseudogene	chr7	76549360	76627982	+		non-IFN			2.90351	3.34019	2.78013	2.70414	darkred	grey	0.140949	0.0173648	0.123585	-0.161693	40.5821	0.139391	0.304254	0.706718	0.0987383	0.113258	0.131452	N	N	N	N
AC004980.9	ENSG00000230305.2	unprocessed_pseudogene	chr7	76524515	76532692	+		non-IFN			2.39454	2.29743	2.46513	2.40079	darkturquoise	purple	0.146658	0.0152808	0.131377	-0.227975	6.60951	-0.00910509	0.9523	0.989361	0.0952181	-0.00630463	0.143214	N	N	N	N
AC004985.12	ENSG00000241057.2	transcribed_unprocessed_pseudogene	chr7	43961590	43973323	-		non-IFN			0.853031	0.97787	0.768228	0.839735	yellow	green	0.190243	0.0720899	0.118154	0.581797	6.85125	-0.130733	0.469321	0.817685	0.0953892	-0.0479603	0.341256	N	N	N	N
AC005019.2	ENSG00000213875.3	processed_pseudogene	chr7	13871856	13872513	+		non-IFN			3.57583	3.66694	3.17772	3.86278	magenta	brown	0.0930496	0.163396	-0.0703462	2.34895	13.8221	-0.290725	0.0259307	0.207532	-0.0266708	-0.0371523	0.180401	N	N	N	N
AC005076.5	ENSG00000224046.1	antisense	chr7	87151423	87152420	-		non-IFN			0.741662	0.942179	0.609223	0.71698	brown	magenta	0.108168	0.0305559	0.0776122	0.694728	7.36227	-0.142322	0.487918	0.831043	-0.00518609	-0.0103692	0.0782055	N	N	N	N
AC005077.7	ENSG00000224273.2	transcribed_unprocessed_pseudogene	chr7	76108434	76132187	-		non-IFN			1.19784	1.13611	1.14252	1.29024	tan	grey	0.103654	0.0398427	0.063811	1.1086	10.3112	-0.142264	0.306398	0.708149	-0.341294	-0.114834	-0.511971	N	N	N	N
AC005082.12	ENSG00000226816.2	lincRNA	chr7	23206013	23208045	+		non-IFN	Cerebrospinal Fluid	Anatomy Category	3.19798	4.38505	1.96515	3.44785	turquoise	tan	0.201866	0.0361947	0.165671	2.36365	85.574	-0.489206	0.0153923	0.14628	-0.0981761	-0.219086	0.170023	N	N	N	N
AC005086.2	ENSG00000280004.1	pseudogene	chr7	102186819	102187039	-		non-IFN			23.7233	24.3934	22.9915	23.8961	cyan	green	0.152158	0.0445163	0.107642	0.482968	17.036	-0.0674221	0.544522	0.861316	0.124138	0.206477	0.23229	N	N	N	N
AC005150.1	ENSG00000248431.1	lincRNA	chr4	162740668	162742048	+		non-IFN			1.43046	0.964242	2.28905	1.00198	midnightblue	midnightblue	0.208245	0.0472381	0.161007	-3.49763	11.5228	0.850118	3.17938e-06	0.000150014	0.161321	-0.0229669	0.0999727	Y	N	N	N
AC005154.6	ENSG00000196295.11	processed_transcript	chr7	30516309	30594809	-		non-IFN			24.4159	21.7061	28.3616	22.8473	turquoise	grey	0.113258	0.0271406	0.0861169	-2.59663	249.223	0.27684	0.0113956	0.12015	0.166625	0.0153113	0.109832	N	N	N	N
AC005189.6	ENSG00000229497.1	processed_pseudogene	chr7	43767290	43767599	+		non-IFN			6.01151	6.35225	5.83676	5.92517	green	blue	0.108094	0.0299937	0.0780999	0.133282	11.3854	-0.033438	0.829257	0.956014	0.173788	0.15694	0.274839	N	N	N	N
AC005251.3	ENSG00000219451.3	processed_pseudogene	chr7	20827326	20827753	+		non-IFN			61.3095	63.9326	54.094	65.8246	darkgrey	black	0.247753	0.118779	0.128974	4.18327	230.423	-0.301835	0.000125406	0.00370446	-0.189483	-0.142079	0.117788	Y	N	N	N
AC005253.2	ENSG00000268030.1	antisense	chr19	18557775	18561560	-		non-IFN			2.02201	1.95306	1.97434	2.11276	orange	green	0.100803	0.0290733	0.07173	0.661834	24.6393	-0.101018	0.562282	0.868415	0.0410452	0.101775	0.131279	N	N	N	N
AC005255.3	ENSG00000256210.3	processed_pseudogene	chr19	14792318	14792533	+		non-IFN			108.132	99.1538	114.99	108.418	yellow	blue	0.256222	0.11051	0.145712	-0.907086	70.8518	0.0718915	0.426366	0.793986	-0.12052	0.0209404	-0.351461	N	N	N	N
AC005264.2	ENSG00000267551.3	antisense	chr19	3141576	3155175	-		non-IFN			1.45628	1.42644	1.45519	1.47831	grey60	blue	0.26438	0.089295	0.175085	0.200477	9.75346	-0.0260149	0.888763	0.97369	-0.0406296	0.119563	-0.136987	N	N	N	N
AC005276.1	ENSG00000197462.3	lincRNA	chr7	125917871	125933832	+		non-IFN			0.806026	0.852502	0.804512	0.774556	orange	grey	0.109375	0.0261092	0.083266	-0.347454	8.40234	0.0334263	0.81757	0.953486	0.177357	0.179457	0.182649	N	N	N	N
AC005301.9	ENSG00000283633.1	lincRNA	chr22	16601911	16615111	+		non-IFN			4.2194	5.04192	2.66683	5.00871	tan	brown	0.0951198	0.0364728	0.058647	2.98793	71.0264	-0.646867	0.000583255	0.01315	-0.0785213	0.147033	0.0221393	Y	N	N	N
AC005306.3	ENSG00000267283.1	processed_transcript	chr19	1989401	1990370	+		non-IFN			1.36808	1.2358	1.95281	0.945523	turquoise	grey	0.441233	0.0276723	0.413561	-2.36542	7.4418	0.641886	0.00188735	0.0312386	0.142081	-0.0171126	0.098589	Y	Y	Y	N
AC005329.7	ENSG00000248015.6	antisense	chr19	1392170	1396467	-		non-IFN			5.4912	5.03375	6.0153	5.35168	lightyellow	black	0.1512	0.0464021	0.104798	-2.71827	4.62951	0.0972609	0.590576	0.877985	0.158216	0.0265695	0.0825035	N	N	N	N
AC005363.9	ENSG00000255513.1	transcribed_processed_pseudogene	chr16	1963745	1964095	-		non-IFN			1.80931	2.21325	1.62532	1.68652	grey	grey	0.0639218	0.027373	0.0365488	0.124341	5.32876	-0.0210768	0.91716	0.982318	-0.0883273	-0.0723419	-0.0770533	N	N	N	N
AC005387.3	ENSG00000268938.2	antisense	chr19	18531613	18532632	+		non-IFN			0.973696	1.03446	1.03711	0.87485	magenta	brown	0.0716162	0.144566	-0.0729493	-0.653204	3.34859	0.108878	0.59746	0.881138	0.0573839	0.103308	-0.00641844	N	N	N	N
AC005480.1	ENSG00000279461.1	protein_coding	chr14	74003369	74003777	+		non-IFN			18.0956	17.8132	17.987	18.3909	darkgrey	brown	0.174378	0.151366	0.023012	0.443619	63.6543	-0.0701351	0.404836	0.782035	0.031609	-0.165271	0.287465	N	N	N	N
AC005517.3	ENSG00000223878.1	processed_pseudogene	chr17	15506866	15507354	+		non-IFN			1.25789	1.09465	1.36533	1.27833	brown	yellow	0.18288	0.0494144	0.133465	-0.420583	6.63991	0.0119304	0.945226	0.987956	0.0821882	0.100424	0.0691853	N	N	N	N
AC005519.4	ENSG00000258559.2	sense_overlapping	chr14	74289127	74294425	-		non-IFN			1.22683	1.17751	1.25674	1.23524	tan	grey	0.0993304	0.0271061	0.0722243	-0.228117	24.8009	-0.0157901	0.880896	0.971576	0.145504	0.00225165	0.237133	N	N	N	N
AC005593.2	ENSG00000279584.1	TEC	chr5	131797415	131797929	+		non-IFN			1.82054	2.7821	1.55739	1.37399	grey	grey	0.0648227	0.0188726	0.0459502	-0.40609	9.06512	0.0896514	0.657717	0.902651	-0.159732	-0.303385	0.00130643	N	N	N	N
AC005616.2	ENSG00000267423.1	lincRNA	chr19	28509238	28518728	+		non-IFN			2.14697	2.035	2.30338	2.088	brown	green	0.182912	0.0324104	0.150502	-1.03071	13.8093	0.0976237	0.44405	0.802901	0.319806	0.317709	0.261174	N	N	N	N
AC005775.2	ENSG00000266933.2	antisense	chr19	490046	507833	-		non-IFN			1.2658	1.07726	1.37695	1.30081	white	green	0.118339	0.0254294	0.0929097	-0.621278	14.2832	0.0458573	0.707345	0.919306	0.0932624	0.104252	0.124361	N	N	N	N
AC005795.1	ENSG00000268034.1	processed_pseudogene	chr19	41506152	41506898	+		non-IFN			35.063	32.4134	38.0716	34.2787	saddlebrown	blue	0.28189	0.44469	-0.162801	-2.54938	329.072	0.142537	0.0124633	0.127843	0.101403	0.208503	-0.289194	N	N	N	N
AC005822.1	ENSG00000235554.1	processed_pseudogene	chr17	16616848	16617881	-		non-IFN			1.55975	1.59871	1.43664	1.64088	grey	blue	0.092936	0.0331905	0.0597455	1.17871	21.5402	-0.162644	0.26288	0.667763	-0.222925	-0.249258	-0.0774875	N	N	N	N
AC005932.1	ENSG00000269019.1	antisense	chr19	18940322	18946831	+		non-IFN			0.905494	1.01085	0.723133	0.992029	grey	grey	0.0580726	0.0194867	0.0385859	1.65196	11.8427	-0.24973	0.212394	0.613433	-0.18701	0.0906174	-0.378444	N	N	N	N
AC005954.4	ENSG00000267205.1	antisense	chr19	3753840	3756517	+		non-IFN			2.4457	2.40329	2.47033	2.45391	yellow	green	0.0936383	0.0911719	0.0024664	-0.09142	7.40147	0.0715372	0.620356	0.889958	0.0999117	-0.0335497	0.201156	N	N	N	N
AC006026.1	ENSG00000279448.1	protein_coding	chr7	23638162	23638536	-		non-IFN			3.91245	3.17453	4.27496	4.11348	grey	lightcyan	0.0953421	0.0469989	0.0483432	-0.342539	12.2904	0.00964041	0.9483	0.988518	0.405343	0.300146	0.373255	N	N	N	N
AC006077.3	ENSG00000279799.1	TEC	chr5	134905235	134905691	+		non-IFN			3.25852	2.87701	2.95903	3.79209	turquoise	lightgreen	0.15942	0.0258168	0.133603	1.74125	14.7851	-0.301734	0.075089	0.383068	-0.175573	-0.369046	0.165699	N	N	N	N
AC006128.2	ENSG00000279716.1	TEC	chr19	15398696	15400356	+		non-IFN			3.05584	3.12304	2.94886	3.1028	grey	turquoise	0.0699213	0.0393205	0.0306009	0.504884	50.0638	-0.0996425	0.562672	0.868415	-0.0837039	-0.104252	-0.084752	N	N	N	N
AC006129.1	ENSG00000268355.1	lincRNA	chr19	41531206	41532174	+		non-IFN			6.28389	6.45719	8.05339	4.60023	skyblue3	grey	0.0755128	0.0239042	0.0516086	-3.68824	46.0429	0.636296	0.000112402	0.00340224	0.299295	0.132622	0.335376	Y	N	N	N
AC006129.2	ENSG00000268027.5	lincRNA	chr19	41545192	41555462	+		non-IFN			2.16556	1.57446	2.33159	2.43632	darkgreen	purple	0.123799	0.130976	-0.00717759	0.168404	16.8852	-0.0516745	0.791043	0.9454	-0.0551751	-0.219536	0.149267	N	N	N	N
AC006273.4	ENSG00000272473.1	lincRNA	chr19	781002	781862	-		non-IFN			1.12591	0.968717	1.25089	1.12658	grey	green	0.105809	0.0611982	0.0446107	-1.20654	13.1524	0.120649	0.32566	0.72167	0.279151	0.147033	0.30701	N	N	N	N
AC006369.2	ENSG00000236213.1	antisense	chr2	37600136	37646698	+		non-IFN			0.802273	0.719671	0.799241	0.863255	brown	grey	0.134664	0.0182993	0.116365	0.509259	4.44683	-0.153336	0.384678	0.766609	0.122965	0.220887	0.0949568	N	N	N	N
AC006386.1	ENSG00000279115.1	protein_coding	chrY	25307702	25308107	+		non-IFN			105.053	106.306	100.087	108.551	violet	brown	0.274578	0.621191	-0.346613	1.93851	361.78	-0.149152	0.053055	0.316494	0.00136899	-0.180583	0.348694	N	Y	N	N
AC006483.5	ENSG00000228974.5	processed_pseudogene	chr7	5560743	5561055	+		non-IFN			113.444	102.416	124.756	111.248	green	black	0.321247	0.17969	0.141558	-3.00596	224.718	0.122576	0.0686273	0.364072	0.148364	0.184185	-0.154456	N	N	N	N
AC006509.7	ENSG00000224058.2	processed_pseudogene	chr2	47731402	47732035	-		non-IFN			1.03914	0.8994	1.08941	1.09343	green	grey	0.0991767	0.021318	0.0778587	0.0312235	8.04665	-0.0468452	0.759425	0.935426	0.243338	0.198821	0.288157	N	N	N	N
AC006547.13	ENSG00000236540.7	antisense	chr22	20058030	20070569	-		non-IFN			11.1465	11.5991	10.8285	11.1076	brown	blue	0.10444	0.0486455	0.0557944	0.378334	26.2428	-0.0782272	0.638227	0.896284	-0.389575	-0.313656	-0.360455	N	N	N	N
AC006548.28	ENSG00000280156.1	sense_overlapping	chr22	16950086	17034417	-		non-IFN			1.05209	0.988243	1.13488	1.02412	lightcyan	green	0.296105	0.20479	0.0913144	-2.32971	1518.36	0.125768	0.0480152	0.29936	0.244389	0.0263444	0.358553	N	N	N	N
AC006942.4	ENSG00000269194.1	antisense	chr19	49808933	49809738	+		non-IFN			1.962	2.1354	1.40526	2.33085	purple	turquoise	0.146082	0.0845422	0.06154	3.13196	3.85022	-0.154473	0.454142	0.80925	-0.307558	-0.249483	-0.192335	N	N	N	N
AC006946.15	ENSG00000235478.4	lincRNA	chr22	17121586	17132104	+		non-IFN			1.05323	1.2532	1.08005	0.888412	darkgreen	grey	0.237116	0.0327342	0.204382	-0.709199	15.9271	0.117936	0.565143	0.86937	0.308108	0.387545	0.28909	N	N	N	N
AC006978.6	ENSG00000235859.5	processed_pseudogene	chr7	30371508	30372741	+		non-IFN			5.13217	4.80712	6.39511	4.24725	lightcyan	tan	0.125433	0.0604583	0.0649744	-3.0336	97.953	0.480191	0.00117843	0.0221607	0.153058	0.132622	-0.0392626	Y	N	N	N
AC006987.4	ENSG00000235193.1	unprocessed_pseudogene	chrY	10088026	10089586	+		non-IFN			1.43732	1.12649	1.85774	1.28578	sienna3	turquoise	0.196846	0.0352297	0.161616	-2.2689	8.40202	0.388289	0.031177	0.232712	0.160204	0.0677748	0.0320009	N	N	N	N
AC007000.10	ENSG00000225726.1	processed_pseudogene	chr7	77071751	77072237	-		non-IFN			0.750094	1.04622	0.580665	0.690561	grey	grey	0.0703799	0.0320715	0.0383085	0.508423	3.39337	-0.0641951	0.72634	0.926114	0.0420377	-0.0992991	0.293084	N	N	N	N
AC007036.4	ENSG00000230751.1	sense_intronic	chr7	30140870	30141417	+		non-IFN			2.1677	1.81919	2.31098	2.28728	lightcyan	grey	0.10248	0.0205085	0.0819712	-0.0752764	9.24734	-0.0220482	0.894955	0.975671	0.213709	0.142755	0.265499	N	N	N	N
AC007036.6	ENSG00000227017.1	lincRNA	chr7	30176387	30179014	-		non-IFN			0.602637	0.507246	0.960055	0.354603	grey	grey	0.111779	0.0438276	0.0679509	-2.26923	5.58261	0.295584	0.0811276	0.39727	0.0416527	-0.0931334	0.0689385	N	N	N	N
AC007040.8	ENSG00000236469.1	antisense	chr2	71002531	71064743	-		non-IFN			0.830902	0.866179	0.668361	0.949419	turquoise	grey	0.1048	0.0336901	0.0711102	0.988892	4.937	-0.152095	0.439199	0.799537	-0.203049	-0.309423	0.0473577	N	N	N	N
AC007041.2	ENSG00000235411.1	processed_pseudogene	chr2	20239892	20241046	-		non-IFN			2.13514	2.15691	2.03228	2.21053	turquoise	blue	0.112598	0.126303	-0.0137047	1.24802	33.9419	-0.117638	0.193057	0.587295	-0.10485	-0.0240927	-0.127647	N	N	N	N
AC007163.1	ENSG00000280298.1	protein_coding	chr2	200682822	200683196	+		non-IFN			5.08435	4.52029	4.99367	5.56252	lightcyan	lightcyan	0.0887336	0.061878	0.0268556	1.00434	15.4478	-0.170021	0.218104	0.621366	0.196034	0.0452583	0.451607	N	N	N	N
AC007228.9	ENSG00000268568.1	lincRNA	chr19	56672574	56673901	-		non-IFN			0.890659	0.971145	0.79784	0.915744	grey	turquoise	0.0817485	0.0239244	0.0578241	1.22252	16.4176	-0.179406	0.223733	0.629104	-0.302571	-0.314106	-0.212226	N	N	N	N
AC007229.3	ENSG00000267544.1	processed_pseudogene	chr19	10841839	10842250	+		non-IFN			8.90556	8.98574	8.85274	8.89556	blue	tan	0.174139	0.0316787	0.14246	0.0699625	31.3947	-0.0518562	0.612799	0.887333	0.0560552	-0.0749801	0.196486	N	N	N	N
AC007238.1	ENSG00000231043.3	processed_pseudogene	chr2	58460292	58462032	-		non-IFN			4.77524	4.80322	4.84579	4.69324	red	turquoise	0.249876	0.217743	0.0321334	-0.618687	88.7414	0.014882	0.824346	0.954471	0.121938	0.418583	-0.133182	N	N	N	N
AC007283.4	ENSG00000235579.1	processed_pseudogene	chr2	201162484	201162680	-		non-IFN			4.89839	4.53182	5.67111	4.47534	grey	grey	0.125526	0.0322275	0.0932982	-0.647961	4.63499	0.0558927	0.775606	0.941173	0.168718	0.176157	0.0886563	N	N	N	N
AC007292.4	ENSG00000269807.1	antisense	chr19	4347244	4354057	-		non-IFN			2.4029	2.17891	2.68833	2.30916	darkturquoise	green	0.117167	0.0600094	0.0571575	-1.17793	6.4848	0.145156	0.377346	0.762111	0.164352	-0.0333245	0.300783	N	N	N	N
AC007292.6	ENSG00000267980.1	antisense	chr19	4363789	4364640	+		non-IFN			4.14668	3.5655	4.61942	4.13981	turquoise	turquoise	0.153889	0.169046	-0.0151569	-1.3493	10.1203	-0.124296	0.353493	0.742705	0.00305578	0.187788	-0.246646	N	N	N	N
AC007318.5	ENSG00000172974.11	processed_pseudogene	chr2	65205108	65205988	+		non-IFN			31.4724	31.5061	30.728	32.1054	paleturquoise	brown	0.257579	0.206943	0.0506358	0.876812	357.927	-0.0756509	0.259006	0.663757	-0.159903	0.135099	-0.340046	N	N	N	N
AC007326.1	ENSG00000279560.1	protein_coding	chr22	18945123	18946971	+		non-IFN			33.211	27.4033	42.8278	28.8252	lightcyan	midnightblue	0.137419	0.0699061	0.0675133	-5.38483	26.6075	0.542015	3.20088e-08	2.36717e-06	0.169217	0.102675	-0.0652071	Y	N	N	N
AC007365.3	ENSG00000226756.1	lincRNA	chr2	64644612	64646698	+		non-IFN			1.11407	1.52526	0.912275	1.00188	grey	grey	0.121082	0.027451	0.0936313	0.367002	9.95268	-0.0606781	0.768678	0.939447	-0.0163196	-0.106128	0.0872693	N	N	N	N
AC007383.3	ENSG00000227946.1	lincRNA	chr2	206084605	206086564	+		non-IFN			3.61546	3.08579	3.91199	3.7277	salmon	red	0.200856	0.0245673	0.176289	-0.353308	17.2057	0.0963319	0.604726	0.883695	-0.142888	-0.332569	0.0131452	N	N	N	N
AC007389.3	ENSG00000235725.1	lincRNA	chr2	65589566	65640177	-		non-IFN			1.10657	0.992362	1.19719	1.10722	cyan	green	0.136891	0.0451511	0.0917397	-1.1752	28.0632	0.0836234	0.355496	0.744373	0.172957	0.164371	0.193719	N	N	N	N
AC007560.1	ENSG00000238165.1	processed_pseudogene	chr2	50829442	50829678	-		non-IFN			70.2722	71.6654	70.4567	69.1259	blue	turquoise	0.268442	0.286481	-0.0180385	-0.331146	59.2763	0.0165254	0.822677	0.95441	-0.00308022	0.305099	-0.332435	N	N	N	N
AC007743.1	ENSG00000233251.7	antisense	chr2	56173534	56185770	-		non-IFN			6.1897	5.8049	6.71212	6.00036	lightcyan	green	0.188277	0.13222	0.0560569	-2.49465	305.939	0.135594	0.0519151	0.31217	0.266586	0.0121589	0.41736	N	N	N	N
AC007879.5	ENSG00000223725.6	antisense	chr2	207239864	207529795	-		non-IFN			0.834558	0.88076	0.565739	1.03914	grey	grey	0.0960202	0.0206368	0.0753834	2.09935	17.9602	-0.197168	0.230638	0.635648	0.00971837	0.184143	0.0260339	N	N	N	N
AC007881.4	ENSG00000233870.1	unprocessed_pseudogene	chr2	71178587	71178773	+		non-IFN			488.045	485.394	554.196	431.547	blue	turquoise	0.325748	0.065888	0.25986	-3.63776	190.189	0.314131	0.000607698	0.0136275	0.189018	-0.184636	0.30234	Y	Y	Y	Y
AC007899.3	ENSG00000224891.1	processed_pseudogene	chr2	37148530	37149304	+		non-IFN			5.57934	3.08456	9.91157	3.51781	skyblue	magenta	0.181548	0.0681279	0.113421	-6.99269	3.75603	0.502086	0.0127895	0.129769	0.321199	0.307351	-0.142522	N	N	N	N
AC007906.1	ENSG00000279018.1	protein_coding	chr16	53207941	53226385	-		non-IFN			13.7619	12.5055	14.6498	13.8652	darkgreen	blue	0.146463	0.0959245	0.0505389	-0.753746	13.0623	0.0796023	0.69064	0.912005	0.232826	0.156265	0.320328	N	N	N	N
AC007919.18	ENSG00000224611.1	processed_pseudogene	chr3	172522228	172522444	+		non-IFN			6.50147	3.55126	11.7697	3.93555	turquoise	blue	0.215354	0.0970922	0.118262	-4.94636	5.59674	1.02545	2.2087e-07	1.36684e-05	0.203872	-0.218636	0.170696	Y	N	N	N
AC007969.5	ENSG00000233762.3	processed_pseudogene	chr2	171517270	171517716	-		non-IFN			107.727	104.316	109.423	108.639	darkgrey	brown	0.151219	0.512061	-0.360842	-0.175694	481.587	-0.0233572	0.760236	0.935738	0.115606	-0.173603	0.23523	N	Y	N	N
AC008065.1	ENSG00000224553.1	processed_pseudogene	chr2	171374931	171375278	-		non-IFN			1.95444	1.93124	1.77613	2.12814	darkgrey	magenta	0.0836406	0.0295691	0.0540716	1.5187	4.88523	-0.215055	0.190243	0.582687	-0.00801846	0.160899	-0.01868	N	N	N	N
AC008074.3	ENSG00000223935.1	antisense	chr2	64395220	64453798	-		non-IFN			0.82666	0.761342	0.965276	0.750457	grey	grey60	0.11349	0.058983	0.0545074	-2.27684	7.36534	0.297977	0.0324801	0.238932	0.132841	0.0405298	0.0624397	N	N	N	N
AC008427.2	ENSG00000251583.1	processed_pseudogene	chr5	149932014	149932668	-		non-IFN			2.98163	2.79657	2.76437	3.30395	grey	blue	0.0689032	0.0351502	0.033753	2.58331	23.2496	-0.235153	0.0192881	0.169942	-0.270718	-0.257589	-0.122804	N	N	N	N
AC008440.10	ENSG00000232324.1	lincRNA	chr19	53864763	53866140	+		non-IFN			1.14454	1.00522	1.13295	1.2531	pink	blue	0.103332	0.0790744	0.0242576	0.421626	9.20491	-0.167156	0.417859	0.790663	-0.193059	-0.181235	-0.0863375	N	N	N	N
AC008592.3	ENSG00000251000.1	processed_pseudogene	chr5	95834424	95835046	-		non-IFN			2.09051	1.8294	2.04104	2.31848	turquoise	grey	0.132271	0.0264559	0.105815	0.957219	9.75377	-0.182045	0.249617	0.653352	-0.252041	-0.259391	-0.104989	N	N	N	N
AC008686.1	ENSG00000280221.1	protein_coding	chr19	13780070	13790158	-		non-IFN			2.06002	1.91387	1.89086	2.31243	orange	grey	0.133159	0.0373912	0.0957681	1.64902	7.18034	-0.285944	0.0637168	0.348678	-0.0765656	-0.0321987	0.0927083	N	N	N	N
AC008694.2	ENSG00000254336.1	processed_pseudogene	chr5	157604707	157605637	-		non-IFN			11.7049	11.7724	9.8972	13.2522	magenta	brown	0.12054	0.074935	0.0456054	4.22459	21.1674	-0.409316	0.000189151	0.00524354	-0.153131	-0.00360265	0.0966864	Y	N	N	N
AC008753.6	ENSG00000228323.2	antisense	chr19	53854581	53869107	-		non-IFN			2.06999	2.03421	1.70348	2.41864	plum1	darkred	0.0973412	0.0315725	0.0657687	2.00434	11.465	-0.336183	0.0716209	0.373782	0.0135923	0.0414351	0.160164	N	N	N	N
AC008810.1	ENSG00000279126.1	protein_coding	chr5	40801222	40801596	-		non-IFN			4.91732	3.88858	5.12541	5.45988	grey	lightcyan	0.106755	0.0478784	0.0588768	0.570179	15.4298	-0.117148	0.382507	0.765843	-0.169852	-0.366569	0.0226582	N	N	N	N
AC008937.2	ENSG00000237705.1	antisense	chr5	56842016	56862164	-		non-IFN			5.55636	5.23862	6.11386	5.28875	black	turquoise	0.130391	0.177823	-0.0474321	-1.62491	6.83622	0.155846	0.43067	0.795551	0.0693295	0.0675496	-0.0762768	N	N	N	N
AC008982.2	ENSG00000269688.1	sense_intronic	chr19	38844729	38845499	-		non-IFN			4.34011	3.78239	4.26097	4.80362	tan	black	0.115047	0.221774	-0.106727	1.00906	25.6867	-0.236405	0.125863	0.48785	-0.04503	-0.120464	0.0780064	N	N	N	N
AC008984.2	ENSG00000275210.1	processed_transcript	chr19	54308915	54337168	-		non-IFN			3.60353	3.15729	4.28966	3.31311	grey	red	0.0782366	0.026908	0.0513286	-2.8747	27.9599	0.558461	0.000308472	0.00784534	0.113553	0.247232	-0.208594	Y	N	N	N
AC008984.7	ENSG00000234436.1	unprocessed_pseudogene	chr19	54301758	54306026	-		non-IFN			10.6725	10.4363	14.3788	7.56899	pink	tan	0.319204	0.0616247	0.257579	-2.90433	52.1051	0.637316	0.000918281	0.0183788	0.185938	0.174278	0.102221	Y	Y	Y	Y
AC008985.1	ENSG00000278999.1	TEC	chr19	47661657	47663895	-		non-IFN			0.887716	0.830806	0.865825	0.947204	lightcyan	pink	0.238762	0.0426761	0.196086	1.13669	31.116	-0.150073	0.154795	0.532891	0.0371094	0.282808	-0.028366	N	N	N	N
AC009005.2	ENSG00000267751.5	antisense	chr19	567210	572228	-		non-IFN			0.898063	0.870352	0.780215	1.02161	grey60	pink	0.12467	0.029182	0.095488	1.13983	7.42924	-0.169014	0.413302	0.787881	-0.225329	-0.170856	-0.0453201	N	N	N	N
AC009022.1	ENSG00000279533.1	protein_coding	chr16	70052395	70052769	-		non-IFN			4.95777	3.87691	4.86118	5.80595	lightcyan	lightcyan	0.0716428	0.0564978	0.0151451	1.43973	15.6265	-0.254291	0.076008	0.385681	-0.117733	-0.467218	0.278125	N	N	N	N
AC009060.1	ENSG00000280006.1	protein_coding	chr16	70205400	70205780	-		non-IFN			11.0017	9.93645	11.2282	11.5538	magenta	blue	0.175334	0.202687	-0.0273534	0.422177	34.5541	-0.0730503	0.500492	0.838433	0.106586	-0.158742	0.290232	N	N	N	N
AC009060.2	ENSG00000280252.1	protein_coding	chr16	70224358	70224738	+		non-IFN			9.3688	8.97774	9.60172	9.43931	blue	grey	0.153135	0.047866	0.105269	-0.271269	28.7604	-0.012595	0.901125	0.977134	0.169119	-0.0148609	0.386573	N	N	N	N
AC009120.10	ENSG00000261248.1	lincRNA	chr16	74282415	74287519	+		non-IFN			1.49283	1.4053	1.61564	1.44626	royalblue	green	0.0763687	0.0272627	0.049106	-0.964018	6.93982	0.136796	0.356499	0.745492	0.138219	0.160318	0.0536186	N	N	N	N
AC009120.6	ENSG00000259972.2	processed_transcript	chr16	74305127	74335346	-		non-IFN			95.3515	93.014	101.25	91.7971	red	blue	0.203118	0.0760046	0.127113	-2.16098	31.1574	-0.132168	0.489541	0.831572	0.117586	0.0531391	-0.0164315	N	N	N	N
AC009133.12	ENSG00000238045.9	antisense	chr16	29808636	29821252	-		non-IFN			8.25038	7.94936	7.62292	9.01651	brown	black	0.10954	0.0386323	0.0709074	3.69521	32.2079	-0.261198	0.0944083	0.426951	-0.0978094	0.0738543	0.0238689	N	N	N	N
AC009133.21	ENSG00000275857.1	antisense	chr16	29804430	29804990	-		non-IFN			12.9339	13.3234	8.72316	16.3743	turquoise	black	0.407981	0.0592224	0.348758	7.39518	20.708	-0.493481	0.00269435	0.0415305	-0.218892	-0.233947	0.317733	Y	Y	Y	Y
AC009245.3	ENSG00000230383.1	processed_pseudogene	chr7	137721985	137722846	+		non-IFN			12.1492	12.2925	10.7271	13.3028	magenta	brown	0.219574	0.21966	-8.64e-05	5.05821	135.519	-0.332456	6.58793e-06	0.000289245	-0.00990072	0.126993	0.405253	Y	N	N	N
AC009264.1	ENSG00000234352.9	antisense	chr7	136685559	137182107	-		non-IFN			1.15616	1.05499	1.30118	1.09961	salmon	magenta	0.0922276	0.0209153	0.0713123	-1.53369	7.84211	0.186872	0.186428	0.577448	0.0818704	-0.150411	0.206691	N	N	N	N
AC009302.2	ENSG00000233868.1	processed_pseudogene	chr2	221944223	221944612	+		non-IFN			17.3554	15.7408	19.1629	16.9002	grey	turquoise	0.107123	0.038682	0.0684412	-2.33413	57.0078	0.133905	0.157554	0.536018	0.23818	0.0484106	0.226063	N	N	N	N
AC009303.2	ENSG00000279227.1	TEC	chr2	118014174	118015673	+		non-IFN			5.63303	5.23431	6.04013	5.55528	grey	greenyellow	0.0762305	0.170801	-0.0945703	-0.7215	125.04	0.106964	0.480019	0.824897	-0.0948514	0.101775	-0.359591	N	N	N	N
AC009403.2	ENSG00000216895.9	antisense	chr7	155611231	155645205	-		non-IFN			6.1413	6.42749	5.21198	6.75927	grey	blue	0.104695	0.0957903	0.00890479	2.63348	48.7367	-0.28073	0.0421608	0.276324	-0.094998	-0.138026	0.171752	N	N	N	N
AC009495.2	ENSG00000235192.1	lincRNA	chr2	165794851	165810010	+		non-IFN			0.809494	0.811298	1.04561	0.599887	tan	blue	0.161381	0.0423425	0.119038	-1.42863	7.57596	0.274085	0.166975	0.549338	-0.199908	-0.467776	0.0567251	N	N	N	N
AC009501.4	ENSG00000231609.5	antisense	chr2	63043922	63048640	-		non-IFN			7.55508	5.0215	10.769	6.50772	brown	pink	0.340217	0.0393296	0.300888	-1.18117	262.107	0.299304	0.145562	0.518893	-0.0303378	-0.103126	-0.0503323	N	Y	N	N
AC009506.1	ENSG00000224152.1	antisense	chr2	159615296	159617082	+		non-IFN			8.7343	8.30255	7.86006	9.81046	grey	blue	0.0835167	0.0925788	-0.00906208	3.04354	49.3581	-0.496647	0.00350156	0.0506064	-0.377792	-0.262543	-0.246991	N	N	N	N
AC009506.2	ENSG00000225369.1	processed_pseudogene	chr2	159462417	159463256	-		non-IFN			2.91711	2.77794	2.91184	3.01999	magenta	grey60	0.179281	0.15481	0.0244712	0.382733	32.0542	-0.058595	0.649683	0.899461	-0.190045	-0.256238	-0.0889031	N	N	N	N
AC009892.10	ENSG00000224730.1	antisense	chr19	54635722	54638892	-		non-IFN			5.43894	4.77346	6.63259	4.85546	cyan	turquoise	0.282344	0.0742687	0.208076	-2.64332	36.0703	0.42966	0.00116952	0.022013	0.211313	-0.142305	0.234365	Y	N	N	N
AC009948.5	ENSG00000223960.6	antisense	chr2	178413939	178440243	+		non-IFN	Respiratory Function Tests	Diagnostic Techniques and Procedures	4.70168	3.96472	6.34308	3.7736	green	blue	0.143048	0.044595	0.0984532	-4.20465	92.982	0.587072	9.27033e-05	0.00286844	0.181978	0.273576	-0.199427	Y	N	N	N
AC009948.7	ENSG00000238082.1	processed_pseudogene	chr2	178454716	178455428	+		non-IFN			2.65544	2.54859	2.80135	2.60212	pink	turquoise	0.151352	0.0686074	0.0827443	-1.07502	23.0601	0.0922483	0.33963	0.732091	-0.0762478	-0.239351	0.0581156	N	N	N	N
AC009950.2	ENSG00000225963.7	antisense	chr2	230121370	230174223	+		non-IFN			25.0886	21.1329	33.5325	20.4304	cyan	yellow	0.165917	0.0592911	0.106625	-3.9166	202.068	0.618577	7.03615e-06	0.000303807	0.194885	0.14906	0.00968594	Y	N	N	N
AC009963.6	ENSG00000235325.1	processed_pseudogene	chr2	107920763	107921248	-		non-IFN			1.90343	2.02158	1.893	1.82924	lightcyan	yellow	0.110965	0.0331247	0.07784	-0.338528	8.9433	0.0340596	0.807245	0.951404	-0.0792058	0.0376026	-0.163104	N	N	N	N
AC009967.3	ENSG00000214369.2	processed_pseudogene	chr2	169790093	169790885	+		non-IFN			1.18998	1.16908	1.31125	1.09773	grey	grey	0.18522	0.0447125	0.140508	-1.81636	11.7688	0.202668	0.111146	0.463127	0.203319	0.295642	-0.00536186	N	N	N	N
AC010082.2	ENSG00000225000.1	antisense	chr7	18429062	18430738	-		non-IFN			0.613707	0.422205	0.900956	0.495429	magenta	grey	0.218093	0.0193102	0.198783	-1.98171	4.85705	0.323505	0.106935	0.454671	0.187307	0.150076	0.0483672	N	N	N	N
AC010136.2	ENSG00000223923.1	antisense	chr2	217978707	217992615	+		non-IFN			2.32356	2.14452	2.42361	2.36166	orange	green	0.148988	0.0395077	0.10948	-0.27496	14.6663	0.00436371	0.971781	0.994089	0.0809904	0.0603444	0.145116	N	N	N	N
AC010226.4	ENSG00000249249.1	antisense	chr5	115602057	115620659	+		non-IFN			3.50177	3.63869	2.90551	3.93125	grey	grey60	0.0759165	0.0340126	0.0419039	2.52014	13.3372	-0.431597	0.0284803	0.220229	-0.27172	-0.240477	-0.124706	N	N	N	N
AC010287.1	ENSG00000279816.1	protein_coding	chr16	58554337	58554935	+		non-IFN			0.901291	0.834572	0.947035	0.908024	pink	grey	0.137455	0.0295454	0.10791	-0.263505	6.18646	0.0307256	0.859229	0.964955	0.192074	0.21706	0.195448	N	N	N	N
AC010412.1	ENSG00000279183.1	protein_coding	chr19	40647563	40647937	+		non-IFN			4.69031	4.64818	4.94169	4.49824	blue	grey	0.124904	0.0420369	0.0828675	-0.969555	13.7301	0.101427	0.444727	0.803429	0.236982	0.233046	0.266536	N	N	N	N
AC010468.1	ENSG00000214784.4	processed_pseudogene	chr5	111192226	111193042	-		non-IFN			27.8559	31.155	21.6755	30.9805	magenta	brown	0.407695	0.265366	0.142329	7.17469	278.027	-0.521507	1.96753e-09	1.75354e-07	-0.217376	-0.0797086	0.104643	Y	N	N	N
AC010518.2	ENSG00000276758.1	unprocessed_pseudogene	chr19	54296194	54296252	-		non-IFN			3002.53	3689.63	2908.24	2600.71	saddlebrown	grey	0.154796	0.0196953	0.135101	-0.647571	10.7109	0.0806122	0.680636	0.910021	-0.192057	-0.179995	-0.282905	N	N	N	N
AC010522.1	ENSG00000269304.1	processed_pseudogene	chr19	57826461	57826778	-		non-IFN			3.58251	3.48574	3.61613	3.62114	grey	grey	0.0923114	0.0302964	0.062015	0.0142719	7.24381	-0.00163063	0.990614	0.998128	0.0321957	0.157166	-0.0634775	N	N	N	N
AC010677.5	ENSG00000232383.1	processed_pseudogene	chr7	26276195	26276606	+		non-IFN			6.48669	6.89118	5.78154	6.82336	darkgrey	blue	0.112798	0.108797	0.00400082	2.22956	22.8683	-0.265955	0.0217878	0.18411	0.0665426	-0.0855629	0.325344	N	N	N	N
AC010733.5	ENSG00000232713.2	processed_pseudogene	chr2	60938204	60938604	-		non-IFN			13.8545	13.5047	13.8587	14.0977	violet	brown	0.130165	0.165953	-0.0357885	0.282884	48.4329	-0.0516113	0.597668	0.881138	0.19623	0.184411	0.199254	N	N	N	N
AC010761.13	ENSG00000265205.1	antisense	chr17	28670054	28672804	-		non-IFN			0.928095	0.842261	0.736657	1.1576	saddlebrown	grey	0.129601	0.0255605	0.104041	1.71546	5.11663	-0.22276	0.266579	0.671501	-0.301675	-0.225951	-0.288639	N	N	N	N
AC010761.14	ENSG00000267729.1	antisense	chr17	28727258	28727739	+		non-IFN			7.3409	6.49501	8.3818	7.01956	orange	grey	0.131725	0.0275211	0.104204	-1.13539	3.55832	0.136709	0.446373	0.804598	0.227814	-0.171351	0.430505	N	N	N	N
AC010761.8	ENSG00000264577.1	antisense	chr17	28721487	28722877	-		non-IFN			16.8082	17.2699	15.568	17.5764	magenta	brown	0.20044	0.345789	-0.145349	2.89865	12.7951	-0.128571	0.533709	0.855797	0.134796	0.280781	0.282795	N	N	N	N
AC010878.3	ENSG00000225402.1	processed_pseudogene	chr2	37816915	37817961	+		non-IFN			1.55321	1.52991	1.48649	1.62853	grey	blue	0.107195	0.244532	-0.137336	1.15841	22.226	-0.116839	0.277533	0.682059	-0.219063	0.113258	-0.509204	N	N	N	N
AC010883.5	ENSG00000234936.1	antisense	chr2	43229573	43233394	+		non-IFN	Platelet Count	Diagnostic Techniques and Procedures	1.92169	2.13216	1.55088	2.10032	tan	yellow	0.0861376	0.0274283	0.0587093	1.13242	6.67129	-0.160748	0.43728	0.798404	0.0392523	0.095587	0.117812	N	N	N	N
AC010970.2	ENSG00000225840.2	processed_pseudogene	chrY	10197256	10199103	-		non-IFN			30.2682	28.4707	30.8884	30.9899	red	brown	0.171489	0.76378	-0.592291	0.0220986	887.295	-0.07585	0.634334	0.894813	0.298097	0.0499867	0.348002	N	Y	N	N
AC010976.2	ENSG00000231731.7	antisense	chr2	127455394	127514623	+		non-IFN			3.61211	3.45664	3.75994	3.59143	purple	salmon	0.223467	0.0764902	0.146977	-0.598194	5.83722	0.296113	0.149449	0.524196	-0.131301	-0.241828	-0.137852	N	N	N	N
AC011242.5	ENSG00000229695.1	processed_pseudogene	chr2	43680465	43681622	-		non-IFN			1.28761	1.33611	1.19184	1.33787	lightcyan	grey60	0.15438	0.0830163	0.0713633	1.59547	20.2205	-0.16685	0.0839401	0.404012	-0.00718719	0.216609	-0.0769686	N	N	N	N
AC011247.3	ENSG00000235586.1	antisense	chr2	38601598	38602178	+		non-IFN			1.44675	1.10492	1.29281	1.82387	tan	grey	0.118131	0.0177105	0.10042	1.02308	3.12351	-0.304066	0.141535	0.513655	0.121893	0.055004	0.32428	N	N	N	N
AC011288.2	ENSG00000229618.1	lincRNA	chr7	13101391	13704149	+		non-IFN			0.92168	0.831838	0.915353	0.99068	sienna3	turquoise	0.198596	0.0534144	0.145181	0.720994	5.89966	-0.128695	0.387446	0.768882	0.056593	0.133973	0.0032863	N	N	N	N
AC011380.8	ENSG00000283602.1	transcribed_unitary_pseudogene	chr5	140569962	140594570	-		non-IFN			3.16329	3.38016	3.13693	3.03347	black	grey	0.115449	0.0230598	0.0923897	-0.384431	62.5986	0.103863	0.372096	0.757596	0.0348359	0.256464	-0.155494	N	N	N	N
AC011747.4	ENSG00000236008.1	lincRNA	chr2	8559833	8583792	-		non-IFN			0.900737	0.861166	0.932546	0.900602	lightcyan	green	0.10558	0.156215	-0.0506346	-0.711939	133.118	0.0382818	0.56583	0.869557	0.0588176	-0.159642	0.161548	N	N	N	N
AC011899.9	ENSG00000233038.5	antisense	chr7	157854529	157866092	+		non-IFN			1.09118	1.11606	0.970788	1.17985	greenyellow	yellow	0.156946	0.0455127	0.111433	1.18755	77.4672	-0.22258	0.194805	0.58956	-0.0609444	0.0141854	0.0968594	N	N	N	N
AC011933.2	ENSG00000228007.1	processed_pseudogene	chr17	75338827	75339147	+		non-IFN			19.4414	20.7627	17.3948	20.3145	magenta	brown	0.140852	0.439194	-0.298342	2.08816	39.892	-0.231712	0.0490602	0.303066	0.0299222	-0.0524636	0.30355	N	Y	N	N
AC012005.1	ENSG00000279274.1	protein_coding	chrY	24362031	24362436	-		non-IFN			104.01	105.311	100.447	106.237	violet	brown	0.172579	0.678841	-0.506262	1.45765	357.92	-0.113388	0.125041	0.486245	0.0385761	-0.179457	0.290578	N	Y	N	N
AC012066.1	ENSG00000213197.3	processed_pseudogene	chr2	152389937	152390630	+		non-IFN			0.989296	0.873552	1.15122	0.928128	blue	blue	0.124224	0.12647	-0.00224604	-2.04474	8.53143	0.255721	0.0652157	0.352812	-0.0905244	-0.0623708	-0.378098	N	N	N	N
AC012146.7	ENSG00000234327.7	processed_transcript	chr17	5111468	5115004	+		non-IFN			3.37303	3.78779	2.89663	3.50062	blue	grey	0.17378	0.0168967	0.156883	0.946906	9.94791	-0.24637	0.217769	0.620929	0.011051	-0.182024	0.351634	N	N	N	N
AC012314.19	ENSG00000224579.1	unprocessed_pseudogene	chr19	54209092	54209418	-		non-IFN			5.25418	6.83945	5.77847	3.67256	grey60	grey	0.12998	0.0258134	0.104167	-2.07646	16.8086	0.328389	0.0786061	0.391622	0.0427076	-0.0893907	0.11381	N	N	N	N
AC012314.8	ENSG00000237017.1	antisense	chr19	54119511	54125343	-		non-IFN			2.23993	2.18037	2.23706	2.2845	turquoise	blue	0.10763	0.0811059	0.0265244	0.414255	12.6082	0.0746376	0.625221	0.891733	-0.149342	0.031298	-0.281584	N	N	N	N
AC012354.8	ENSG00000231848.1	processed_pseudogene	chr2	44996413	44996873	+		non-IFN			4.23494	4.27795	4.57877	3.90119	grey	black	0.0693618	0.069896	-0.000534239	-2.25164	18.4362	0.18029	0.117284	0.473196	0.12162	-0.184861	0.115712	N	N	N	N
AC012358.7	ENSG00000203327.2	antisense	chr2	55214387	55216126	-		non-IFN			1.07835	1.05815	1.13762	1.04031	darkgrey	grey	0.181125	0.0203768	0.160748	-1.08813	13.0266	0.0746247	0.512581	0.845049	0.11722	0.116411	0.0676286	N	N	N	N
AC012358.8	ENSG00000240401.8	antisense	chr2	55282350	55346049	+		non-IFN			1.86235	1.64887	2.13005	1.77683	grey	green	0.116775	0.0833739	0.0334014	-1.76918	27.3547	0.194949	0.150339	0.52546	0.0448344	-0.371748	0.397988	N	N	N	N
AC012442.5	ENSG00000243389.1	3prime_overlapping_ncRNA	chr2	112589040	112614431	+		non-IFN			1.01313	1.27887	1.13142	0.721181	turquoise	turquoise	0.752632	0.0556058	0.697026	-1.17745	3.29939	0.303996	0.130259	0.495923	-0.0700132	-0.184664	-0.0361679	N	Y	N	N
AC012593.1	ENSG00000226994.7	lincRNA	chr2	34799850	35185689	+		non-IFN			0.777417	0.857337	0.764607	0.732307	greenyellow	grey	0.102407	0.0335956	0.0688117	-0.261253	3.11468	0.0114008	0.95123	0.989361	0.0381453	0.13534	-0.0110733	N	N	N	N
AC013264.1	ENSG00000283224.1	protein_coding	chr2	196989591	197310604	-		non-IFN			18.9518	18.5897	18.3779	19.7139	pink	grey60	0.095725	0.417137	-0.321412	1.03791	50.8055	-0.094512	0.31911	0.717447	-0.219038	-0.291814	-0.109313	N	Y	N	N
AC013448.1	ENSG00000231189.1	lincRNA	chr2	223498773	223504611	+		non-IFN			1.54712	1.45017	1.49386	1.66254	saddlebrown	green	0.132102	0.0384251	0.0936773	1.13689	16.2094	-0.151427	0.227537	0.633718	0.116975	0.0596689	0.321193	N	N	N	N
AC013461.1	ENSG00000091436.16	protein_coding	chr2	173075435	173268010	+		non-IFN			10.9716	11.0806	10.0417	11.7151	turquoise	blue	0.183838	0.0911693	0.0926684	1.72182	478.742	-0.193563	0.0761372	0.385866	-0.159756	-0.0238675	-0.173828	N	N	N	N
AC015691.13	ENSG00000239920.1	antisense	chr11	5572322	5624896	-		non-IFN			2.03044	1.89021	2.1189	2.05136	yellow	green	0.115998	0.0439861	0.0720118	-0.385932	11.5029	0.0245745	0.833661	0.95719	0.221678	0.276278	0.11675	N	N	N	N
AC015849.13	ENSG00000270894.1	sense_overlapping	chr17	35818399	35823713	+		non-IFN			5.87594	5.52883	6.00541	6.00671	pink	turquoise	0.0765894	0.057859	0.0187304	0.00296778	22.2204	-0.0240744	0.822574	0.95441	0.184496	0.185086	0.275876	N	N	N	N
AC015849.14	ENSG00000271268.1	processed_pseudogene	chr17	35861093	35861566	-		non-IFN			3.18444	3.06977	3.16797	3.27992	grey60	grey	0.102925	0.0319097	0.0710157	0.402038	14.7332	-0.0764332	0.511549	0.844186	-0.120715	-0.100424	-0.0396086	N	N	N	N
AC015849.19	ENSG00000270871.1	antisense	chr17	35816717	35830293	-		non-IFN			1.46121	1.40499	1.34628	1.60231	black	salmon	0.0911182	0.0254795	0.0656388	1.33714	7.42673	-0.218858	0.175293	0.564155	0.0514838	0.029947	0.223468	N	N	N	N
AC015971.2	ENSG00000228363.2	antisense	chr2	86562070	86618766	+		non-IFN			1.6684	2.06432	1.34276	1.67626	skyblue3	magenta	0.107855	0.0479376	0.0599172	1.0891	28.6347	-0.285594	0.139116	0.510738	-0.0366698	0.111682	-0.0788712	N	N	N	N
AC015987.1	ENSG00000224746.1	antisense	chr7	135926455	135932881	+		non-IFN			1.24275	1.16842	1.19619	1.3363	lightgreen	grey	0.159148	0.023755	0.135393	0.597927	13.8399	-0.091422	0.642945	0.897225	-0.0840807	0.0364931	-0.111907	N	N	N	N
AC016142.1	ENSG00000280141.1	protein_coding	chr3	150819598	150819972	+		non-IFN			4.96067	4.33519	5.14682	5.23792	lightcyan	lightcyan	0.125344	0.0650994	0.0602444	0.145229	15.2243	-0.06058	0.683193	0.910582	0.363173	0.135099	0.620073	N	N	N	N
AC016292.3	ENSG00000108958.4	processed_pseudogene	chr17	1858039	1858446	-		non-IFN	Aorta	Anatomy Category	17.7124	16.9348	17.5096	18.4402	red	turquoise	0.142482	0.123476	0.0190061	0.833571	62.0099	-0.088723	0.268226	0.672985	-0.159169	-0.0657483	-0.188703	N	N	N	N
AC016577.1	ENSG00000279646.1	protein_coding	chr5	156658587	156660435	-		non-IFN			10.1241	8.18542	12.5637	9.33998	lightcyan	brown	0.124168	0.0754585	0.0487094	-2.73991	8.1337	0.368101	0.00830334	0.0954609	-0.0883976	-0.0117086	-0.348175	N	N	N	N
AC016700.6	ENSG00000231414.1	processed_pseudogene	chr2	70253855	70254010	-		non-IFN			58.4017	58.7283	58.8341	57.7897	black	brown	0.0832866	0.37712	-0.293834	-0.201894	12.1509	-0.0418376	0.762903	0.936817	0.152276	0.0157616	0.162931	N	Y	N	N
AC016708.2	ENSG00000230076.1	processed_pseudogene	chr2	214847128	214847445	+		non-IFN			96.4075	102.731	83.6819	103.172	magenta	brown	0.131664	0.24156	-0.109896	3.75744	187.992	-0.324301	0.000229017	0.00612326	-0.169021	-0.209629	0.118653	Y	N	N	N
AC016712.2	ENSG00000235225.1	processed_pseudogene	chr2	222726457	222726834	+		non-IFN			19.6038	20.0406	18.0993	20.6231	darkgrey	brown	0.189762	0.170217	0.0195449	2.78754	58.0019	-0.207362	0.0141326	0.138758	-0.132572	-0.0882649	0.0475649	N	N	N	N
AC016716.1	ENSG00000223427.1	processed_pseudogene	chr2	80162428	80163135	-		non-IFN			3.82471	3.46399	3.51687	4.35095	skyblue	lightyellow	0.191441	0.11111	0.080331	1.91379	33.6001	-0.265307	0.0631007	0.346571	-0.202635	0.0308477	-0.215858	N	N	N	N
AC016722.4	ENSG00000228925.1	antisense	chr2	46899275	46908678	+		non-IFN			0.986327	0.950738	0.888983	1.09734	greenyellow	blue	0.122609	0.0379286	0.0846804	1.32279	25.8789	-0.230232	0.22517	0.630939	0.0035203	0.0580927	0.0902868	N	N	N	N
AC016734.2	ENSG00000228305.2	processed_pseudogene	chr2	63622178	63622831	-		non-IFN			84.6251	85.1782	91.1028	78.5191	green	blue	0.155101	0.0797376	0.0753638	-3.1068	639.73	0.195841	0.00248573	0.039036	0.144428	0.095245	-0.170715	Y	N	N	N
AC016739.2	ENSG00000218175.2	processed_pseudogene	chr2	176200908	176201252	-		non-IFN			13.8791	13.0091	14.736	13.737	pink	brown	0.370033	0.112311	0.257722	-0.224669	35.3794	-0.410254	0.000139426	0.00403292	-0.0667871	0.00270199	0.203232	Y	Y	Y	Y
AC016747.3	ENSG00000212978.6	processed_transcript	chr2	61141592	61144969	-		non-IFN			2.43686	2.64167	2.11884	2.5729	turquoise	yellow	0.139061	0.0288045	0.110257	0.967435	49.2965	-0.261209	0.134793	0.503396	-0.159512	-0.360265	0.160337	N	N	N	N
AC016757.3	ENSG00000186235.10	processed_transcript	chr2	238224552	238231677	-		non-IFN			0.677387	0.565832	0.648277	0.781817	plum1	magenta	0.106514	0.026874	0.0796402	0.647344	16.1471	-0.114633	0.543302	0.860592	0.00970588	-0.0966826	0.143739	N	N	N	N
AC016831.7	ENSG00000233559.1	lincRNA	chr7	130853720	130928649	+		non-IFN			0.930357	0.820967	1.00391	0.94267	pink	grey	0.231565	0.0259608	0.205604	-0.435011	25.9751	0.0428849	0.785727	0.942894	0.0544906	0.114834	0.0307875	N	N	N	N
AC016894.1	ENSG00000234624.2	processed_pseudogene	chr2	61416887	61417197	-		non-IFN			4.70991	4.55683	4.22422	5.24652	saddlebrown	grey	0.133467	0.0133827	0.120084	2.44513	9.15339	-0.308241	0.021215	0.180587	-0.224196	-0.276503	0.108275	N	N	N	N
AC017002.1	ENSG00000240350.2	lincRNA	chr2	111491273	111570974	+		non-IFN			0.791996	0.527781	1.23632	0.58645	yellow	grey	0.211045	0.0265069	0.184539	-2.32209	8.75879	0.546199	0.00822566	0.0950394	0.0847917	-0.110803	0.16091	N	N	N	N
AC017002.2	ENSG00000224959.1	lincRNA	chr2	111491943	111494811	-		non-IFN			0.635594	0.341096	0.736095	0.754799	black	yellow	0.0668609	0.0417842	0.0250767	0.117539	8.9561	-0.048606	0.812368	0.952704	-0.0627679	-0.257262	0.20849	N	N	N	N
AC017006.3	ENSG00000231336.1	antisense	chr2	46166789	46167978	-		non-IFN			1.1718	1.37233	1.08005	1.1112	magenta	grey	0.0768824	0.0298234	0.047059	0.137135	3.01325	-0.0486152	0.808412	0.951618	-0.111329	-0.110311	-0.0571256	N	N	N	N
AC017081.1	ENSG00000279921.1	protein_coding	chr2	206355739	206356119	+		non-IFN			13.4824	12.5664	13.9894	13.6817	grey	green	0.1459	0.0725646	0.0733357	-0.363028	41.6266	0.00778595	0.933173	0.985712	0.296362	0.240477	0.34558	N	N	N	N
AC017104.2	ENSG00000233538.1	lincRNA	chr2	231452195	231453153	+		non-IFN	Heart Rate	Diagnostic Techniques and Procedures;Physical Examination	1.70674	1.94216	1.66426	1.57804	brown	grey	0.206347	0.0210704	0.185276	-0.378642	11.5224	0.0698642	0.675202	0.908206	0.0882998	-0.127894	0.340738	N	N	N	N
AC017116.11	ENSG00000239775.1	sense_overlapping	chr7	44064908	44066079	+		non-IFN			1.29113	1.38453	1.10646	1.38814	grey	grey	0.130001	0.0183067	0.111695	1.16583	3.09632	-0.162272	0.430635	0.795551	-0.205962	-0.194452	-0.12142	N	N	N	N
AC018462.2	ENSG00000229839.6	antisense	chr2	62069447	62146881	-		non-IFN			1.16999	1.34281	1.02734	1.17387	grey	grey	0.089683	0.0183976	0.0712853	0.8186	24.6853	-0.0954972	0.626447	0.892262	-0.0293844	-0.104702	0.115539	N	N	N	N
AC018738.2	ENSG00000237039.1	processed_pseudogene	chr2	231256097	231256306	+		non-IFN			149.059	144.469	142.312	158.253	darkgrey	brown	0.157513	0.516735	-0.359223	1.84525	89.6739	-0.184009	0.0604194	0.33854	0.117244	0.00765563	0.334511	N	Y	N	N
AC018804.6	ENSG00000227632.2	unprocessed_pseudogene	chr2	130202312	130212628	+		non-IFN			1.11564	1.36547	0.95407	1.08187	purple	grey	0.258142	0.0216596	0.236483	0.392566	7.15046	-0.100579	0.623875	0.8912	-0.255702	0.131947	-0.529461	N	N	N	N
AC019050.1	ENSG00000233428.1	processed_pseudogene	chr2	129496297	129496788	+		non-IFN			0.988473	0.842161	0.968206	1.10964	grey	grey	0.0980796	0.0153771	0.0827026	1.26694	5.09654	-0.171979	0.265264	0.669679	0.120471	0.295192	0.103605	N	N	N	N
AC019097.7	ENSG00000231822.1	processed_pseudogene	chr2	99102018	99102752	+		non-IFN			0.86358	0.752349	1.05423	0.773872	turquoise	grey	0.378488	0.0229275	0.355561	-1.79459	8.08453	0.310626	0.0903853	0.419012	-0.00550106	-0.0896159	-0.0605574	N	Y	N	N
AC020983.5	ENSG00000243099.1	processed_pseudogene	chr7	138688980	138689522	+		non-IFN			2.1176	2.14381	2.1002	2.11445	yellow	brown	0.115138	0.261543	-0.146405	0.0767812	12.2636	-0.0682552	0.620458	0.889958	-0.00161345	-0.21098	0.141138	N	N	N	N
AC021016.7	ENSG00000230580.1	processed_pseudogene	chr2	218354075	218354572	+		non-IFN			5.25943	5.24282	5.30243	5.2332	grey60	brown	0.0879186	0.0568657	0.0310528	-0.19158	26.416	-0.0245065	0.81703	0.953486	-0.0331002	-0.0414305	-0.0268093	N	N	N	N
AC022182.3	ENSG00000254802.1	lincRNA	chr8	60965802	60967775	-		non-IFN			2.02319	1.70083	2.15934	2.1306	grey	purple	0.0889083	0.0265484	0.0623598	-0.114482	18.8814	-0.00177405	0.989112	0.997868	0.0741454	0.125868	0.0171234	N	N	N	N
AC022210.2	ENSG00000213399.3	processed_pseudogene	chr2	84915868	84916660	+		non-IFN			10.5325	10.9737	9.06103	11.5194	darkgrey	cyan	0.192669	0.0635155	0.129154	4.37366	103.543	-0.357802	1.78352e-05	0.000693942	-0.180902	0.0668742	0.00536186	Y	N	N	N
AC022405.1	ENSG00000279084.1	protein_coding	chr15	40683694	40684068	-		non-IFN			4.53825	4.43698	4.56334	4.5876	yellow	green	0.186273	0.0429109	0.143362	0.0636387	13.372	-0.0352356	0.781027	0.942044	0.0882509	0.116636	0.149786	N	N	N	N
AC022431.3	ENSG00000234553.1	sense_intronic	chr5	56536583	56537826	-		non-IFN	Breast Neoplasms	Neoplasms;Skin and Connective Tissue Diseases	1.37149	1.3418	1.35595	1.40616	lightyellow	green	0.133848	0.040006	0.0938416	0.326288	7.81987	-0.0585171	0.690877	0.912145	0.159561	0.193192	0.216896	N	N	N	N
AC023590.1	ENSG00000225885.6	antisense	chr8	118282139	118400605	+		non-IFN			1.85085	1.62636	2.01276	1.86646	brown	green	0.0930824	0.0522588	0.0408236	-0.912148	18.6297	0.126956	0.251324	0.655055	0.222363	0.178106	0.230041	N	N	N	N
AC024560.3	ENSG00000214135.8	transcribed_unprocessed_pseudogene	chr3	197578213	197627906	-		non-IFN			14.3848	14.6496	13.4746	15.001	turquoise	blue	0.126947	0.102055	0.024892	1.37196	209.738	-0.157922	0.16632	0.548569	-0.216496	-0.069351	-0.257023	N	N	N	N
AC025171.1	ENSG00000215068.7	antisense	chr5	43041575	43045390	+		non-IFN			4.18	3.27182	4.28791	4.72585	grey	blue	0.0723351	0.0394314	0.0329038	0.759234	39.8115	-0.0335842	0.832265	0.956859	-0.309171	-0.343828	-0.14477	N	N	N	N
AC025335.1	ENSG00000179859.8	protein_coding	chr17	7913324	7916276	-		non-IFN	Body Height	Body Weights and Measures;Diagnostic Techniques and Procedures;Physical Examination	1.98018	2.06097	1.88223	2.00959	orange	grey	0.0841549	0.0232736	0.0608813	0.482767	87.2501	-0.0905802	0.549363	0.863383	-0.115215	-0.102225	-0.0721257	N	N	N	N
AC025442.3	ENSG00000253744.1	antisense	chr5	66144156	66144795	-		non-IFN			4.5212	4.25396	4.30811	4.89786	turquoise	turquoise	0.179349	0.0792288	0.10012	1.58207	3.79208	-0.288827	0.1575	0.536018	-0.142742	-0.00180132	-0.171407	N	N	N	N
AC026248.1	ENSG00000280151.1	protein_coding	chr8	128118011	128118385	+		non-IFN			8.16745	7.55056	8.58387	8.23546	lightcyan	darkgreen	0.138181	0.0835338	0.0546474	-0.567877	24.5687	0.0242996	0.827654	0.95556	0.28893	0.272225	0.30995	N	N	N	N
AC026271.5	ENSG00000174977.8	processed_pseudogene	chr17	18650195	18651542	+		non-IFN			6.49139	6.80284	6.49625	6.26725	salmon	turquoise	0.179937	0.320138	-0.140201	-0.608036	121.88	0.0437381	0.578801	0.873723	-0.14367	0.0891655	-0.545353	N	N	N	N
AC027601.1	ENSG00000260005.6	antisense	chr17	81228707	81233983	+		non-IFN			2.51967	2.5015	2.60232	2.45956	blue	turquoise	0.272996	0.254692	0.0183046	-0.678385	7.78198	0.143804	0.426857	0.794181	-0.0642202	-0.0628212	-0.103605	N	N	N	N
AC027612.3	ENSG00000230572.5	transcribed_unprocessed_pseudogene	chr2	91686102	91714745	-		non-IFN			0.816105	0.79639	0.899298	0.756614	darkgrey	green	0.106226	0.104456	0.00177058	-1.59084	13.6903	0.228233	0.115564	0.470337	-0.00630713	-0.0425563	-0.0669368	N	N	N	N
AC027612.6	ENSG00000143429.10	transcribed_unprocessed_pseudogene	chr2	91617160	91659972	-		non-IFN			154.133	156.692	151.529	154.623	grey	turquoise	0.101983	0.308217	-0.206234	0.318077	99.4137	-0.0562697	0.511987	0.844537	0.0532439	0.19792	-0.0968594	N	N	N	N
AC034220.3	ENSG00000233006.6	processed_transcript	chr5	132311285	132369916	-		non-IFN	Body Height	Body Weights and Measures;Diagnostic Techniques and Procedures;Physical Examination	1.0022	0.794762	1.23961	0.939139	grey	blue	0.0916754	0.0570064	0.0346689	-1.61832	7.59301	0.320712	0.104211	0.448663	0.00513371	0.00270199	-0.115539	N	N	N	N
AC055733.1	ENSG00000280127.1	protein_coding	chr3	130868872	130869246	-		non-IFN			4.83328	4.12754	4.95836	5.22108	lightcyan	lightcyan	0.251857	0.0346343	0.217222	0.536545	14.8058	-0.107311	0.415557	0.789096	0.191512	0.100424	0.343159	N	N	N	N
AC055764.1	ENSG00000234136.1	antisense	chr3	197830685	197831296	-		non-IFN			2.58554	2.85077	2.27075	2.67607	tan	pink	0.22482	0.0299473	0.194872	1.03388	3.1537	-0.175512	0.360806	0.748642	0.00557374	-0.11596	0.122804	N	N	N	N
AC061992.2	ENSG00000267737.1	lincRNA	chr17	78315729	78347798	+		non-IFN			1.40152	1.3679	1.2268	1.57942	grey	lightgreen	0.0702232	0.021	0.0492232	1.80032	12.7639	-0.297256	0.0869447	0.410141	0.0996917	0.190715	0.136987	N	N	N	N
AC062017.1	ENSG00000222020.2	antisense	chr2	239401436	239402364	+		non-IFN			2.77656	3.2869	2.55	2.61623	royalblue	grey	0.132196	0.0207126	0.111484	0.154888	15.7413	-0.130789	0.479916	0.824897	0.0746588	0.0502119	0.122631	N	N	N	N
AC066615.1	ENSG00000259752.2	protein_coding	chr15	47133652	47134026	-		non-IFN			5.12738	4.50504	5.11662	5.57618	black	lightcyan	0.169838	0.0583722	0.111466	0.736738	15.6728	-0.127893	0.378173	0.762746	0.292841	0.182834	0.480838	N	N	N	N
AC068522.4	ENSG00000242970.2	processed_pseudogene	chr8	58588420	58588764	-		non-IFN			22.0106	21.5331	21.5565	22.7482	blue	black	0.117368	0.329903	-0.212535	0.973651	54.2417	-0.115552	0.233963	0.638066	0.077079	0.0335497	0.165699	N	N	N	N
AC068580.5	ENSG00000229512.1	sense_intronic	chr11	1763009	1763749	-		non-IFN			1.15096	1.66505	0.87326	1.0331	cyan	turquoise	0.271588	0.0291212	0.242467	0.468637	2.92278	-0.140533	0.496994	0.836186	0.019682	0.070879	0.0322597	N	N	N	N
AC068580.6	ENSG00000235027.1	antisense	chr11	1760348	1762486	+		non-IFN			26.7903	23.3076	32.4277	24.2747	yellow	turquoise	0.24301	0.373368	-0.130358	-4.5524	18.3575	0.338995	0.0946075	0.427183	0.127878	0.135099	-0.270342	N	N	N	N
AC068657.2	ENSG00000223908.5	processed_pseudogene	chr5	160023740	160024045	-		non-IFN			4.80018	4.85509	4.41336	5.10273	grey	grey	0.0747289	0.0336539	0.041075	1.13132	8.58701	-0.198138	0.213227	0.614354	-0.139612	-0.0497616	-0.156186	N	N	N	N
AC068831.6	ENSG00000258384.1	antisense	chr15	90952239	90955225	-		non-IFN			0.890272	0.860762	0.913399	0.890697	grey	blue	0.0801044	0.0474461	0.0326584	-0.312263	12.405	-0.0891798	0.481782	0.826192	-0.00503592	-0.115285	0.153245	N	N	N	N
AC069257.8	ENSG00000228028.2	antisense	chr3	196250542	196251654	+		non-IFN			1.63981	2.22084	1.5458	1.31262	grey	grey	0.101668	0.034171	0.0674966	-0.314912	5.38507	0.0343851	0.815482	0.953337	0.0800207	0.201986	0.0409904	N	N	N	N
AC069277.2	ENSG00000189229.10	lincRNA	chr3	6490479	6736129	+		non-IFN			1.32378	1.36029	1.35831	1.26753	pink	tan	0.122962	0.0747102	0.0482521	-0.650258	14.3255	0.0918507	0.467096	0.816468	0.0524861	0.0743046	0.0124534	N	N	N	N
AC069282.6	ENSG00000225507.1	processed_pseudogene	chr7	47956793	47957318	+		non-IFN			1.12119	1.24707	1.04733	1.0975	red	pink	0.19749	0.0288107	0.168679	0.156923	6.72187	0.0282092	0.888433	0.973441	0.010637	0.0523774	0.0523441	N	N	N	N
AC069363.1	ENSG00000277089.4	antisense	chr17	36072866	36090134	+		non-IFN			11.2546	12.7578	10.6405	10.7353	skyblue3	magenta	0.0801105	0.117457	-0.0373466	0.0252947	142.361	0.0213289	0.917584	0.982318	0.0759055	0.135324	-0.0323441	N	N	N	N
AC072062.3	ENSG00000227769.7	antisense	chr2	215004782	215085488	+		non-IFN			1.23986	1.28975	1.36073	1.09801	turquoise	green	0.119325	0.044824	0.0745015	-1.39316	4.72852	0.281486	0.0807694	0.396505	0.32251	0.215709	0.303489	N	N	N	N
AC073046.25	ENSG00000235499.1	lincRNA	chr2	73985132	73986343	+		non-IFN			0.896631	0.757789	0.909158	0.983584	purple	turquoise	0.106607	0.0409645	0.0656423	0.305052	3.68639	-0.0783073	0.704199	0.918649	-0.00132335	0.133061	-0.0324865	N	N	N	N
AC073063.10	ENSG00000228335.1	processed_pseudogene	chr7	99442890	99443496	-		non-IFN			4.9046	4.74749	5.18713	4.7662	purple	pink	0.104602	0.037127	0.0674748	-1.35742	33.8173	0.103786	0.241865	0.646408	-0.0595755	-0.145457	-0.170369	N	N	N	N
AC073072.7	ENSG00000234513.1	processed_pseudogene	chr7	22773646	22773993	-		non-IFN			10.8429	11.3363	10.4474	10.8436	brown	black	0.103536	0.320698	-0.217162	0.524262	26.6202	-0.0929646	0.41868	0.791047	0.133012	0.133298	0.118999	N	N	N	N
AC073254.1	ENSG00000237126.8	antisense	chr2	232580948	232611971	-		non-IFN			17.4627	17.9865	16.8657	17.6197	blue	blue	0.164633	0.193801	-0.0291686	0.547258	17.0907	0.375296	0.00602281	0.0754548	-0.141446	0.0486357	-0.29594	N	N	N	N
AC073257.1	ENSG00000232140.1	lincRNA	chr2	120553743	120558109	-		non-IFN			2.39825	2.29997	2.44214	2.42889	blue	green	0.120436	0.096459	0.0239768	-0.0687349	13.0435	-0.0149091	0.892049	0.974576	0.108859	-0.0643973	0.268266	N	N	N	N
AC073264.10	ENSG00000229977.2	processed_pseudogene	chr7	143532749	143533164	-		non-IFN			1.14322	1.13471	1.05289	1.22893	grey	turquoise	0.0719191	0.0864413	-0.0145221	1.24613	4.2018	-0.204821	0.233517	0.638066	-0.109765	-0.117099	0.113464	N	N	N	N
AC073283.7	ENSG00000225187.1	antisense	chr2	47067822	47071204	+		non-IFN			1.42015	1.54072	1.32334	1.42047	purple	salmon	0.146522	0.0434803	0.103041	0.28212	17.1113	-0.0593954	0.773656	0.940285	0.10268	0.0463397	0.247704	N	N	N	N
AC073333.1	ENSG00000280130.1	protein_coding	chr7	16789242	16789622	+		non-IFN			12.9014	12.2751	13.3046	12.9878	green	blue	0.194064	0.0698039	0.12426	-0.379968	39.6793	0.0123809	0.899713	0.976695	0.290421	0.289338	0.321712	N	N	N	N
AC073410.1	ENSG00000236047.1	processed_pseudogene	chr2	202520401	202520989	+		non-IFN			1.07079	1.16627	1.09569	0.98142	royalblue	pink	0.183374	0.053701	0.129673	-0.378813	7.54541	0.0288108	0.885826	0.972906	-0.124206	-0.0768045	-0.142662	N	N	N	N
AC073465.3	ENSG00000226131.1	processed_pseudogene	chr2	173485865	173486362	-		non-IFN			1.42873	1.52909	1.48253	1.31041	tan	grey	0.0651354	0.0176404	0.047495	-1.21538	6.95835	0.137429	0.339507	0.732042	0.032049	-0.0330993	-0.0171234	N	N	N	N
AC073657.1	ENSG00000279937.1	protein_coding	chr15	41781148	41784031	-		non-IFN			12.6284	12.7939	13.4316	11.8028	brown	grey	0.120154	0.0199621	0.100192	-1.08003	4.58489	0.0948136	0.558753	0.867804	0.0942402	-0.0146358	0.070396	N	N	N	N
AC073850.6	ENSG00000229436.1	processed_pseudogene	chr7	80662331	80662585	-		non-IFN			3.76208	3.97962	3.86137	3.52091	brown	grey	0.121087	0.0267969	0.0942903	-0.398238	4.99973	0.0842776	0.683686	0.910582	-0.0464823	-0.139801	0.0187681	N	N	N	N
AC074011.2	ENSG00000230730.1	antisense	chr2	28633282	28664540	-		non-IFN			1.25836	1.19032	0.999818	1.53452	grey	turquoise	0.134899	0.0420264	0.0928725	2.46213	13.9486	-0.326647	0.0721126	0.37456	-0.218926	-0.0328888	-0.249759	N	N	N	N
AC074019.2	ENSG00000203387.2	processed_pseudogene	chr2	228352120	228353215	-		non-IFN			2.13159	2.0477	2.20262	2.12815	turquoise	red	0.252115	0.0360382	0.216076	-0.603115	32.4595	0.0118968	0.884772	0.972565	0.0240062	0.0468344	-0.0646882	N	N	N	N
AC074117.10	ENSG00000234072.1	antisense	chr2	27356246	27367622	+		non-IFN			5.64614	5.8584	5.42579	5.69075	salmon	grey	0.236273	0.0408903	0.195383	0.599685	136.534	-0.0592545	0.510533	0.843875	0.0197526	0.00743046	0.098762	N	N	N	N
AC074183.3	ENSG00000280325.1	TEC	chr7	84939335	84940256	-		non-IFN			2.45541	2.45198	2.13734	2.73848	violet	blue	0.22819	0.036051	0.192139	2.43181	10.3216	-0.209352	0.176139	0.565494	0.0762233	0.0866887	0.338316	N	N	N	N
AC074289.1	ENSG00000225889.7	antisense	chr2	64143239	64252859	+		non-IFN			11.7722	10.9281	11.302	12.7829	grey	grey	0.0973727	0.0361962	0.0611766	1.25022	265.381	-0.173907	0.148705	0.523327	-0.1777	-0.128119	0.109659	N	N	N	N
AC078883.3	ENSG00000232788.1	antisense	chr2	172464262	172466022	-		non-IFN			1.51645	1.50572	1.18697	1.81474	darkorange	brown	0.103365	0.0272608	0.0761046	1.76442	8.76779	-0.26064	0.205736	0.603394	-0.136018	-0.0130093	-0.0713802	N	N	N	N
AC078899.1	ENSG00000213985.4	processed_pseudogene	chr19	20257720	20259418	+		non-IFN			9.30914	9.6648	8.70667	9.58969	paleturquoise	blue	0.285859	0.290143	-0.00428394	1.40372	150.884	-0.134845	0.130431	0.495923	-0.10221	0.160318	-0.21015	N	N	N	N
AC079250.1	ENSG00000230979.3	processed_pseudogene	chr2	47690716	47691246	-		non-IFN			67.4436	66.49	65.9205	69.4605	darkgrey	brown	0.240547	0.22793	0.0126163	1.38985	377.351	-0.104215	0.119275	0.476497	0.0142277	-0.0873642	0.163277	N	N	N	N
AC079305.10	ENSG00000222043.2	antisense	chr2	177264359	177265515	+		non-IFN			9.06228	9.60369	8.53364	9.14656	grey	grey	0.0938219	0.0330816	0.0607403	0.870838	9.29724	-0.452059	0.0200797	0.174049	-0.0536106	0.0139603	-0.113983	N	N	N	N
AC079325.6	ENSG00000231027.1	unprocessed_pseudogene	chr17	74560716	74567343	-		non-IFN			26.442	18.7549	35.3643	23.9955	grey	midnightblue	0.073548	0.0462564	0.0272916	-1.85279	245.371	0.377851	0.0411822	0.272699	0.240306	0.0227417	0.313582	N	N	N	N
AC079610.2	ENSG00000196096.3	lincRNA	chr2	213276552	213284205	-		non-IFN			0.888822	0.89947	0.926759	0.847832	royalblue	grey	0.0965676	0.049842	0.0467255	-1.09316	22.528	0.118638	0.280293	0.685816	0.118711	-0.0108079	0.131625	N	N	N	N
AC079630.4	ENSG00000225342.2	antisense	chr12	40186009	40224915	-		non-IFN			6.77166	6.47199	7.82318	6.05539	grey60	greenyellow	0.11259	0.043889	0.0687006	-1.41929	184.722	0.260331	0.115001	0.46971	-0.0301666	0.125192	-0.32569	N	N	N	N
AC079807.2	ENSG00000233230.1	antisense	chr2	47905678	47907810	+		non-IFN			0.800418	0.726351	0.994276	0.68165	tan	grey	0.10307	0.0272294	0.0758404	-1.25728	6.92665	0.177936	0.382553	0.765843	-0.204814	-0.197177	-0.220378	N	N	N	N
AC079807.3	ENSG00000236549.1	processed_pseudogene	chr2	47883455	47883909	+		non-IFN			0.913814	1.09	1.01184	0.70295	orangered4	grey	0.0889621	0.0204961	0.068466	-0.979737	4.31164	0.164	0.382272	0.765843	0.0564738	0.0383573	0.121279	N	N	N	N
AC079922.2	ENSG00000231747.1	processed_pseudogene	chr2	112621809	112622167	-		non-IFN			21.2717	20.5552	21.2869	21.764	cyan	brown	0.151989	0.464902	-0.312913	0.363068	57.6162	-0.0702039	0.490284	0.831695	0.0810392	-0.100649	0.220874	N	Y	N	N
AC079922.3	ENSG00000237753.1	lincRNA	chr2	112641832	112645690	-		non-IFN			0.802782	1.14025	0.540473	0.796018	orange	grey	0.0941206	0.0238902	0.0702304	1.78334	21.963	-0.338552	0.0945268	0.42707	-0.0536376	0.057874	-0.0157397	N	N	N	N
AC080002.1	ENSG00000230621.1	processed_pseudogene	chr2	225992981	225993197	-		non-IFN			11.8798	10.0636	12.1862	12.8915	black	blue	0.114228	0.0489995	0.0652281	0.538848	8.08409	-0.0517744	0.72759	0.926138	-0.0699895	0.00337748	-0.177806	N	N	N	N
AC083873.4	ENSG00000237821.1	processed_pseudogene	chr7	133169416	133170514	-		non-IFN			1.90049	2.01388	1.67187	2.02218	black	black	0.11065	0.0489614	0.0616881	2.68374	28.0412	-0.263594	0.0109166	0.116453	-0.0734854	0.274026	-0.100665	N	N	N	N
AC083884.8	ENSG00000232729.7	processed_transcript	chr7	74688939	74729001	-		non-IFN			4.97001	5.04996	4.7128	5.14052	grey	brown	0.169334	0.143671	0.0256635	0.920404	13.5923	0.373421	0.0415413	0.273899	-0.1214	-0.0929934	-0.0534456	N	N	N	N
AC083899.3	ENSG00000204745.3	unprocessed_pseudogene	chr2	87125390	87196647	+		non-IFN			1.02258	1.07092	0.972826	1.03235	brown	blue	0.205594	0.0526224	0.152972	0.557044	62.0449	-0.0774858	0.562689	0.868415	-0.0662982	0.231695	-0.26031	N	N	N	N
AC083949.1	ENSG00000224875.2	antisense	chr2	42143238	42170301	-		non-IFN			1.56913	1.53804	1.58952	1.57309	lightgreen	lightgreen	0.159207	0.0266583	0.132549	-0.0566354	12.4758	0.0314928	0.874476	0.969238	0.148684	0.297218	0.0534456	N	N	N	N
AC084117.3	ENSG00000256006.1	sense_intronic	chr11	18405609	18406731	+		non-IFN			4.43857	4.38205	4.89239	4.07803	grey	grey	0.0712253	0.0134075	0.0578178	-1.35569	6.89347	0.295659	0.0808287	0.396505	0.078888	0.00202649	0.094092	N	N	N	N
AC090154.1	ENSG00000278888.1	protein_coding	chr8	66674499	66675916	-		non-IFN			14.3387	14.4063	15.6133	13.1665	royalblue	green	0.112545	0.0508629	0.0616818	-1.38434	4.33049	0.107741	0.507018	0.842632	0.254999	0.34	0.0411652	N	N	N	N
AC090286.2	ENSG00000235672.1	transcribed_processed_pseudogene	chr17	18908279	18908865	+		non-IFN			1.77044	1.88543	1.70893	1.74354	darkgrey	red	0.135359	0.0257592	0.1096	0.179525	11.4375	0.012413	0.930201	0.984748	0.0631202	0.225165	-0.134738	N	N	N	N
AC090498.1	ENSG00000279483.1	protein_coding	chr7	137513832	137514238	+		non-IFN			420.745	422.511	405.551	432.906	violet	brown	0.262526	0.758147	-0.495621	1.79403	1459.32	-0.130057	0.0642948	0.350187	0.00774945	-0.0758808	0.206691	N	Y	N	N
AC090505.4	ENSG00000230401.1	lincRNA	chr3	194765238	194768712	-		non-IFN			1.29755	1.24354	1.30612	1.32812	lightgreen	grey	0.159787	0.0365216	0.123266	0.153562	7.72436	-0.031479	0.8259	0.954775	0.125947	0.260742	0.0508512	N	N	N	N
AC090602.2	ENSG00000242088.1	processed_pseudogene	chr15	24910874	24911125	-		non-IFN			23.665	23.2639	22.3477	25.1104	violet	brown	0.161338	0.152938	0.00840005	1.88457	24.9062	-0.195798	0.0611499	0.340394	0.0304844	0.195669	0.0214474	N	N	N	N
AC090804.1	ENSG00000230593.3	processed_pseudogene	chr11	3892398	3892887	-		non-IFN			6.10195	6.00602	6.06245	6.20451	turquoise	cyan	0.125195	0.0235471	0.101648	0.344918	30.0674	-0.049726	0.625734	0.89181	-0.0475479	0.0146358	-0.0129722	N	N	N	N
AC091133.1	ENSG00000230532.1	antisense	chr17	48931791	48937100	+		non-IFN			17.8315	16.8822	18.9949	17.4752	black	red	0.205665	0.079239	0.126426	-1.3334	3.8012	0.17597	0.388232	0.769792	-0.168092	-0.055841	-0.427219	N	N	N	N
AC091177.1	ENSG00000230113.1	antisense	chr17	30956280	30956961	-		non-IFN			16.2345	13.8104	18.3155	16.1094	turquoise	turquoise	0.236437	0.138563	0.0978738	-1.97244	30.9216	0.238403	0.100847	0.441748	0.0695984	0.135099	-0.102048	N	N	N	N
AC091492.2	ENSG00000225026.1	processed_pseudogene	chr3	12328003	12328274	+		non-IFN			22.8573	20.4323	22.0674	25.266	steelblue	green	0.172416	0.0314867	0.14093	1.79421	31.0188	-0.198473	0.066559	0.357111	0.0939469	0.312305	0.0427219	N	N	N	N
AC091729.9	ENSG00000229043.2	antisense	chr7	1160374	1165267	+		non-IFN			2.57276	2.22602	2.85734	2.56642	turquoise	blue	0.883382	0.0313084	0.852074	-0.299107	49.2966	0.0972834	0.638269	0.896284	-0.273028	-0.496244	-0.12342	N	Y	N	N
AC091814.2	ENSG00000225231.1	lincRNA	chr12	9936579	9943495	-		non-IFN			2.36509	3.21567	2.02439	2.0653	greenyellow	grey	0.233995	0.0549913	0.179004	0.0421138	27.8068	-0.0152622	0.932252	0.985508	0.01258	0.107735	0.0499711	N	N	N	N
AC092066.1	ENSG00000279095.1	TEC	chr19	44664131	44666158	+		non-IFN			1.89831	1.93633	1.41253	2.3001	turquoise	grey	0.525255	0.0225208	0.502734	2.79516	58.3562	-0.525401	0.00437092	0.0600893	-0.195374	0.00180132	-0.0560401	N	Y	N	N
AC092106.1	ENSG00000224061.1	processed_pseudogene	chr2	106253231	106253717	-		non-IFN			1.92218	1.79896	2.02125	1.92173	grey	grey	0.0871969	0.0368927	0.0503042	-0.427077	9.37787	0.0345763	0.813672	0.953102	0.202879	0.0427814	0.307529	N	N	N	N
AC092155.1	ENSG00000229503.1	processed_pseudogene	chr2	62532583	62533059	-		non-IFN			16.8132	18.5217	15.0324	17.1785	magenta	cyan	0.0946304	0.0914111	0.00321928	3.07122	75.1382	-0.215462	0.00438877	0.0602553	-0.0347136	-0.0155364	0.226928	N	N	N	N
AC092301.3	ENSG00000269148.1	antisense	chr19	45830164	45831108	+		non-IFN			0.880414	0.858526	0.942239	0.841313	brown	green	0.178094	0.0325538	0.145541	-1.0686	8.39341	0.104119	0.446845	0.80493	0.034078	0.145457	-0.117788	N	N	N	N
AC092316.1	ENSG00000268618.1	antisense	chr19	8549506	8550139	+		non-IFN			4.47401	4.00062	4.87607	4.4534	pink	tan	0.109208	0.0356942	0.0735133	-0.487887	11.1769	0.106061	0.571464	0.871953	0.037501	0.0367061	0.103605	N	N	N	N
AC092415.1	ENSG00000235493.1	lincRNA	chr3	27997210	28028604	-		non-IFN			4.0903	3.83856	4.43583	3.96311	turquoise	green	0.113893	0.0816007	0.0322918	-1.8986	38.7306	0.145699	0.0742422	0.380986	-0.0743899	-0.196795	-0.129204	N	N	N	N
AC092610.12	ENSG00000213935.3	processed_pseudogene	chr7	4865432	4865804	-		non-IFN			1.88274	1.81512	1.69003	2.1005	grey	brown	0.0815774	0.116885	-0.0353071	1.57982	5.56727	-0.275624	0.121224	0.480174	0.277405	0.122265	0.61433	N	N	N	N
AC092620.2	ENSG00000241772.2	3prime_overlapping_ncRNA	chr2	138569090	138574458	+		non-IFN			4.3884	4.03747	4.45302	4.57909	cyan	blue	0.14503	0.0484315	0.0965983	0.176171	39.2681	-0.0313968	0.85617	0.964399	0.184789	0.209179	0.341775	N	N	N	N
AC092620.3	ENSG00000237772.1	lincRNA	chr2	138604510	138613167	+		non-IFN			0.806231	1.17255	0.318198	0.978273	grey	grey	0.104344	0.017235	0.0871089	2.82538	7.128	-0.607073	0.00285154	0.0433131	-0.0317241	-0.505134	0.445121	Y	N	N	N
AC092651.1	ENSG00000230395.1	unprocessed_pseudogene	chr2	87118534	87120980	-		non-IFN			3.63478	3.43084	3.74227	3.68389	grey	tan	0.0757547	0.0551454	0.0206093	-0.11179	8.99031	-0.0414817	0.802769	0.949535	0.0583287	0.19702	-0.0166045	N	N	N	N
AC092652.1	ENSG00000231758.2	antisense	chr2	143640756	143656179	-		non-IFN			1.05972	1.03104	1.05629	1.08299	yellow	blue	0.171449	0.110047	0.0614028	0.0819782	8.24321	-0.0348941	0.863101	0.965648	0.109496	-0.0224546	0.370851	N	N	N	N
AC092669.3	ENSG00000232164.1	lincRNA	chr2	66383306	66392450	+		non-IFN			12.8967	12.4745	14.084	12.1472	lightcyan	green	0.292394	0.136083	0.156311	-2.14731	324.454	0.176036	0.0647264	0.351254	0.264239	0.0779073	0.350942	N	N	N	N
AC092798.2	ENSG00000213872.3	processed_pseudogene	chr3	25749488	25749896	+		non-IFN			1.21177	1.31388	1.25679	1.09996	turquoise	turquoise	0.359351	0.0530297	0.306321	-0.438028	4.63623	0.0671969	0.744872	0.931568	0.0299776	-0.0715993	0.154489	N	Y	N	N
AC092881.1	ENSG00000279530.1	protein_coding	chr12	70321677	70324274	-		non-IFN			0.753582	0.613708	0.754678	0.851349	lightgreen	tan	0.0925854	0.0276893	0.0648962	0.525482	34.1405	-0.0772176	0.709069	0.919704	0.0289149	0.158587	-0.0498551	N	N	N	N
AC092933.4	ENSG00000213358.3	unprocessed_pseudogene	chr3	196527339	196528791	-		non-IFN			3.57694	3.2524	3.93723	3.48814	yellowgreen	blue	0.161648	0.117663	0.0439854	-1.68753	46.4313	0.113804	0.285038	0.690384	0.399769	0.358238	0.380692	N	N	N	N
AC093323.3	ENSG00000170846.16	lincRNA	chr4	6673451	6676047	+		non-IFN			2.32372	2.37274	2.00153	2.57341	blue	yellow	0.111391	0.0419172	0.0694742	1.78575	72.5086	-0.299028	0.0921008	0.422442	-0.0607489	0.403271	-0.332262	N	N	N	N
AC093495.4	ENSG00000228242.6	antisense	chr3	14144637	14165978	+		non-IFN			1.38216	1.42383	1.19292	1.51974	grey	blue	0.119463	0.0614337	0.0580298	1.43976	17.9785	-0.190958	0.351126	0.740417	-0.205595	0.0621457	-0.293457	N	N	N	N
AC093616.4	ENSG00000234231.3	unprocessed_pseudogene	chr2	87700984	87738105	+		non-IFN			1.91555	1.977	1.88346	1.90049	darkgreen	blue	0.0882536	0.0475319	0.0407218	0.0915133	62.9932	-0.0119046	0.929073	0.984343	-0.035447	0.215033	-0.199427	N	N	N	N
AC093627.10	ENSG00000240859.1	lincRNA	chr7	149597	155465	+		non-IFN			1.43463	1.44277	1.42522	1.43719	turquoise	yellow	0.23166	0.0342433	0.197416	0.0572949	106.897	-0.0222032	0.905049	0.978549	-0.0917711	-0.241377	0.0731634	N	N	N	N
AC093627.9	ENSG00000242474.2	lincRNA	chr7	135853	149466	-		non-IFN			1.01534	0.927518	1.00001	1.09086	black	blue	0.105213	0.143624	-0.0384105	0.332075	11.2649	-0.107186	0.604465	0.883695	0.0822167	-0.0133683	0.229945	N	N	N	N
AC093642.5	ENSG00000220804.8	transcribed_unprocessed_pseudogene	chr2	242088633	242160153	+		non-IFN			12.884	12.0861	12.8421	13.4843	turquoise	blue	0.188071	0.0948259	0.0932449	0.458753	79.8676	-0.129452	0.302366	0.70489	0.191658	0.215033	0.242667	N	N	N	N
AC093673.5	ENSG00000232533.1	antisense	chr7	143379692	143380495	-		non-IFN			55.2243	47.3214	58.4974	57.9148	greenyellow	turquoise	0.0951931	0.0591882	0.0360049	-0.148276	486.266	0.00934897	0.919996	0.98257	-0.185914	-0.125642	-0.327246	N	N	N	N
AC093716.1	ENSG00000235243.1	processed_pseudogene	chr7	84847877	84848253	-		non-IFN			2.32644	2.2153	2.39151	2.34747	skyblue	magenta	0.11566	0.0442526	0.0714079	-0.158105	6.96526	0.0394973	0.794456	0.946764	-0.0510682	0.0943443	-0.11848	N	N	N	N
AC093724.2	ENSG00000213222.3	processed_pseudogene	chr2	131723253	131724279	-		non-IFN			1.60505	1.54248	1.51228	1.73107	grey	blue	0.20986	0.0652111	0.144649	1.44255	22.4904	-0.189133	0.141677	0.513856	-0.202953	-0.00405298	-0.319463	N	N	N	N
AC093732.1	ENSG00000233845.1	antisense	chr2	47035279	47040524	-		non-IFN			1.11882	0.834077	1.19082	1.25629	turquoise	grey	0.29946	0.0139837	0.285477	0.266854	8.51162	0.0205038	0.91389	0.981471	-0.0132799	0.0199493	-0.0240439	N	Y	N	N
AC093818.1	ENSG00000225205.5	antisense	chr2	172480840	172556596	-		non-IFN	Prostatic Neoplasms	Male Urogenital Diseases;Neoplasms	1.8927	1.68996	1.80072	2.11697	tan	blue	0.110375	0.0523121	0.0580629	1.17335	25.6142	-0.263374	0.138005	0.508946	-0.109372	0.261192	-0.234192	N	N	N	N
AC093826.1	ENSG00000281369.1	pseudogene	chr4	129041766	129041877	+		non-IFN			99.9811	98.0814	101.891	99.6372	pink	turquoise	0.174807	0.039941	0.134866	-0.189328	6.02876	0.0197921	0.896012	0.975939	0.180853	0.26547	0.0934001	N	N	N	N
AC093838.4	ENSG00000152117.17	transcribed_processed_pseudogene	chr2	131492813	131521573	+		non-IFN			2.63258	2.54877	2.61994	2.70289	salmon	grey	0.112486	0.0417893	0.0706965	0.388145	164.61	-0.0385952	0.724108	0.925041	-0.0497725	0.0202649	-0.056386	N	N	N	N
AC096775.2	ENSG00000237551.1	processed_pseudogene	chr7	96283357	96283804	+		non-IFN			1.0206	0.793152	1.39517	0.850642	grey	lightgreen	0.112718	0.0273439	0.0853745	-1.51205	5.3534	0.232191	0.221862	0.626943	0.0737626	-0.203492	0.179399	N	N	N	N
AC097374.2	ENSG00000259848.8	transcribed_unprocessed_pseudogene	chr2	94867486	94947341	-		non-IFN			0.765499	0.933859	0.666789	0.733755	brown	grey	0.267956	0.0223699	0.245586	0.458134	74.0898	-0.128461	0.526898	0.851422	-0.223425	-0.158587	-0.276741	N	N	N	N
AC097382.5	ENSG00000187904.3	sense_overlapping	chr4	6995341	6998958	+		non-IFN			1.28781	1.39087	1.23008	1.266	brown	green	0.172724	0.0254801	0.147244	0.273324	8.27372	-0.0448395	0.747359	0.932354	0.130323	0.186662	0.14477	N	N	N	N
AC097495.2	ENSG00000237576.1	antisense	chr2	68832044	68837724	+		non-IFN			0.804492	0.904117	0.867714	0.678384	brown	grey	0.102991	0.0209998	0.0819908	-0.755479	4.96218	0.129745	0.51123	0.844186	-0.0474184	-0.196739	0.158434	N	N	N	N
AC097523.1	ENSG00000233045.1	processed_pseudogene	chr2	138278574	138279210	+		non-IFN			31.475	32.7284	27.1882	34.3726	magenta	cyan	0.359219	0.0756465	0.283572	6.82441	229.003	-0.350425	5.05827e-08	3.5281e-06	-0.407934	-0.238675	-0.221912	Y	Y	Y	Y
AC097523.3	ENSG00000237939.1	processed_pseudogene	chr2	138307319	138307970	+		non-IFN			0.905665	0.854505	1.06715	0.799293	grey	grey	0.0803884	0.0279135	0.0524749	-1.96673	7.05279	0.322179	0.0561147	0.324985	-0.0628268	-0.0722781	-0.223296	N	N	N	N
AC097533.1	ENSG00000237868.1	processed_pseudogene	chr4	122077840	122078318	-		non-IFN			2.04016	1.97925	2.11026	2.0213	grey	blue	0.140683	0.117048	0.0236345	-0.325732	9.41892	0.0565298	0.724818	0.925266	0.028871	0.188689	-0.149094	N	N	N	N
AC097721.2	ENSG00000228043.5	lincRNA	chr2	138418284	138501698	-		non-IFN			1.03006	1.07172	0.861548	1.14934	purple	grey	0.0958897	0.0217277	0.074162	1.49383	11.8373	-0.246728	0.211696	0.613098	-0.175451	-0.19094	-0.0923624	N	N	N	N
AC097724.3	ENSG00000226833.5	antisense	chr2	28708953	28736205	-		non-IFN			2.34267	2.17673	2.18848	2.59584	saddlebrown	royalblue	0.0854022	0.0307761	0.0546261	1.16765	21.3702	-0.194218	0.244702	0.648574	-0.156627	-0.25196	0.0307875	N	N	N	N
AC098614.2	ENSG00000213846.5	transcribed_processed_pseudogene	chr3	27632976	27635427	+		non-IFN			9.20089	8.83541	9.34618	9.33067	pink	brown	0.253914	0.0761635	0.17775	-0.027096	238.081	-0.00238932	0.97745	0.994946	-0.181538	0.121815	-0.472017	N	N	N	N
AC098973.2	ENSG00000225548.5	lincRNA	chr3	27802762	27891301	+		non-IFN			1.05215	1.00708	1.13197	1.01355	royalblue	grey	0.159344	0.0261998	0.133144	-0.864687	6.07424	0.122703	0.428656	0.794918	0.112306	0.243629	-0.065899	N	N	N	N
AC099850.1	ENSG00000224738.1	antisense	chr17	59106598	59118267	+		non-IFN			1.21283	1.04805	1.07973	1.44658	cyan	greenyellow	0.0661348	0.0337811	0.0323537	1.78109	22.9222	-0.365001	0.0435542	0.281127	-0.147875	0.00337748	-0.211707	N	N	N	N
AC100830.4	ENSG00000265967.1	antisense	chr15	64695041	64695594	+		non-IFN			0.635227	0.747828	0.62159	0.567777	brown	pink	0.244383	0.0690341	0.175349	-0.21665	4.14437	0.0477979	0.799464	0.948448	-0.0305115	-0.178084	0.215533	N	N	N	N
AC104451.2	ENSG00000233133.1	unprocessed_pseudogene	chr3	17706058	17706233	-		non-IFN			38.2679	31.4465	41.8208	39.9481	tan	brown	0.149567	0.167165	-0.0175986	-0.338577	13.6037	0.0349917	0.826584	0.955143	0.0849995	0.0378278	0.13543	N	N	N	N
AC104534.2	ENSG00000268756.1	antisense	chr19	38820166	38823223	+		non-IFN			1.23667	1.19862	1.29363	1.21328	orange	green	0.100288	0.0652569	0.0350312	-0.473907	7.71437	0.118456	0.454682	0.809285	0.122304	-0.218411	0.36132	N	N	N	N
AC104843.3	ENSG00000225416.1	processed_pseudogene	chr7	152602213	152602892	-		non-IFN			4.11306	4.29764	3.9093	4.16256	green	red	0.125074	0.0585775	0.0664966	0.625272	8.17355	-0.124636	0.394469	0.773442	-0.0779101	-0.311404	0.189568	N	N	N	N
AC104981.1	ENSG00000278938.1	protein_coding	chr17	77777090	77777464	-		non-IFN			4.63353	4.04203	4.58561	5.09333	blue	lightcyan	0.307409	0.0638659	0.243543	0.805486	14.205	-0.158584	0.290975	0.694648	0.174864	-0.0689006	0.373255	N	N	N	N
AC105052.1	ENSG00000279168.1	protein_coding	chr7	102672879	102678856	-		non-IFN			4.26525	5.31239	3.49804	4.20304	yellow	green	0.139614	0.0598921	0.079722	1.08	18.3559	-0.213807	0.2336	0.638066	0.0762233	0.182384	0.124361	N	N	N	N
AC105402.3	ENSG00000226340.1	processed_pseudogene	chr2	148872253	148872797	-		non-IFN			0.969486	0.958717	0.972715	0.974239	magenta	brown	0.11568	0.0387562	0.0769234	0.0122461	5.81138	0.00735403	0.963427	0.992701	0.0958048	0.375576	-0.0842331	N	N	N	N
AC107081.5	ENSG00000236498.1	antisense	chr2	61868432	61886082	+		non-IFN			7.62651	7.90534	7.53182	7.51324	brown	grey	0.233618	0.0217242	0.211894	-0.0344176	6.49395	-0.246342	0.228096	0.63419	-0.114531	-0.0477351	-0.0530997	N	N	N	N
AC107982.4	ENSG00000250111.3	unprocessed_pseudogene	chr17	18835707	18842364	+		non-IFN			5.76079	5.57796	5.34633	6.25554	green	black	0.134674	0.0420294	0.0926444	1.05383	108.481	-0.168584	0.352445	0.741999	0.0355204	-0.063947	0.240938	N	N	N	N
AC107983.4	ENSG00000227077.3	processed_pseudogene	chr17	18572752	18572961	+		non-IFN			145.829	143.981	141.739	150.742	darkgrey	brown	0.202533	0.520455	-0.317922	0.992749	85.9614	-0.128608	0.207756	0.605897	0.0497481	-0.115735	0.26152	N	Y	N	N
AC108479.2	ENSG00000233205.1	processed_pseudogene	chr2	87972656	87973082	+		non-IFN			1.83584	2.0277	1.63094	1.88121	cyan	grey	0.13337	0.0279341	0.105435	1.31456	6.72557	-0.181463	0.212213	0.613364	-0.0990072	0.0166622	-0.0541375	N	N	N	N
AC108488.4	ENSG00000242282.6	lincRNA	chr2	3531813	3536873	-		non-IFN			0.899104	1.01251	0.419315	1.2424	darkred	yellow	0.0697085	0.0437732	0.0259353	3.10289	8.63523	-0.619025	0.00263182	0.0407775	-0.208272	-0.14977	-0.112426	Y	N	N	N
AC108925.1	ENSG00000279524.1	protein_coding	chr8	127630283	127630657	-		non-IFN			2.90597	2.61383	2.57598	3.40336	grey	lightcyan	0.0903678	0.0641046	0.0262633	1.31267	8.81205	-0.332524	0.0611747	0.340394	0.215273	0.0180132	0.477206	N	N	N	N
AC109486.1	ENSG00000280447.1	protein_coding	chr5	60430738	60431112	+		non-IFN			11.509	11.1094	11.9562	11.3964	skyblue	blue	0.123267	0.114108	0.00915928	-0.784873	34.096	0.0304693	0.762566	0.93654	0.280252	0.14951	0.376714	N	N	N	N
AC109829.2	ENSG00000280034.1	protein_coding	chr2	27556908	27557282	+		non-IFN			4.79011	4.33663	4.69145	5.19728	lightcyan	lightcyan	0.122282	0.0638567	0.058425	0.889219	14.4579	-0.166291	0.236705	0.640499	0.166185	0.0988477	0.32102	N	N	N	N
AC110926.4	ENSG00000226789.1	processed_pseudogene	chr2	127247258	127250082	+		non-IFN			1.04937	0.975117	1.13768	1.02386	darkred	green	0.194391	0.0694215	0.124969	-1.61996	47.2314	0.128043	0.114778	0.46926	0.228792	0.0738543	0.225198	N	N	N	N
AC111155.1	ENSG00000224011.1	processed_pseudogene	chr17	60727165	60727482	-		non-IFN			35.6508	33.1932	38.5089	34.8637	green	grey	0.100712	0.021947	0.0787647	-2.761	72.5683	0.118125	0.0571924	0.328506	0.349923	0.331894	0.223468	N	N	N	N
AC111200.2	ENSG00000213605.2	processed_pseudogene	chr2	86885075	86885731	-		non-IFN			1.19054	1.29706	1.0663	1.22497	grey	magenta	0.118296	0.0356532	0.082643	1.24416	8.77156	-0.162809	0.263035	0.667771	0.087493	0.335947	-0.0129722	N	N	N	N
AC111200.7	ENSG00000231351.2	processed_pseudogene	chr2	86930250	86930754	-		non-IFN			0.890439	0.973523	0.754362	0.951859	orange	grey	0.0872794	0.0222284	0.065051	1.66179	4.46897	-0.30141	0.0742486	0.380986	-0.182402	-0.305686	-0.042549	N	N	N	N
AC112497.1	ENSG00000279413.1	pseudogene	chrX	15702602	15703243	-		non-IFN			13.5164	12.1757	15.4109	12.791	grey	turquoise	0.106175	0.0741001	0.0320752	-2.60018	7.10308	0.11953	0.542933	0.860311	0.166992	0.304199	-0.136641	N	N	N	N
AC113189.5	ENSG00000233223.2	antisense	chr17	7581964	7584072	-		non-IFN			53.0607	52.4637	56.4073	50.5294	grey	turquoise	0.111909	0.0656205	0.0462883	-1.80823	11.4904	0.0797636	0.691519	0.912643	0.0838506	0.243629	-0.194411	N	N	N	N
AC113404.1	ENSG00000254893.5	protein_coding	chr5	76170093	76174331	-		non-IFN			55.9426	54.3539	59.9907	53.4921	red	blue	0.260429	0.227181	0.0332476	-2.39161	1474.24	0.132116	0.0334008	0.243302	0.0885442	0.133973	-0.159991	N	N	N	N
AC114271.2	ENSG00000274425.1	antisense	chr19	10333436	10336248	+		non-IFN			1.1295	1.08978	1.11173	1.17323	grey	yellow	0.106432	0.067705	0.0387274	0.463571	28.8898	-0.0995491	0.536967	0.85674	-0.119738	-0.247007	-0.0150478	N	N	N	N
AC114730.7	ENSG00000234793.1	antisense	chr2	241754793	241755740	-		non-IFN			0.979464	1.06224	0.864051	1.02287	grey	grey	0.0720648	0.0255332	0.0465316	1.06377	9.07537	-0.20414	0.273485	0.677575	0.117122	0.229218	0.17279	N	N	N	N
AC115617.2	ENSG00000233585.1	processed_pseudogene	chrX	48775993	48776970	-		non-IFN			5.25465	5.24663	5.05643	5.43523	darkgreen	blue	0.278393	0.0935957	0.184797	0.936231	68.4395	-0.115962	0.252516	0.656473	-0.125434	0.21706	-0.387265	N	N	N	N
AC116366.5	ENSG00000238160.1	antisense	chr5	132419416	132426714	-		non-IFN			1.05163	1.24333	0.771906	1.16311	grey	blue	0.0826924	0.074317	0.00837537	1.97717	10.8141	-0.268235	0.18938	0.581925	-0.203686	-0.0358812	-0.206604	N	N	N	N
AC116366.6	ENSG00000234290.2	antisense	chr5	132468890	132473043	-		non-IFN			2.55271	2.29649	3.16136	2.19652	grey	magenta	0.150275	0.0515962	0.0986783	-2.70694	116.163	0.346681	0.0390571	0.264374	0.264655	0.28596	0.18853	N	N	N	N
AC124944.3	ENSG00000226155.1	antisense	chr3	195912049	195913986	+		non-IFN			2.14042	1.78713	2.35006	2.20483	greenyellow	magenta	0.218105	0.0347676	0.183338	-0.719585	16.0878	0.0514972	0.666237	0.905941	0.152887	0.406424	-0.0890761	N	N	N	N
AC125232.1	ENSG00000231259.4	unprocessed_pseudogene	chr2	87031815	87053069	-		non-IFN			3.32541	3.75467	3.06788	3.24964	darkgreen	red	0.12028	0.076984	0.0432963	0.567346	67.0745	-0.0635968	0.625651	0.89181	-0.114115	0.350808	-0.436559	N	N	N	N
AC125238.2	ENSG00000233459.1	processed_pseudogene	chr2	203634577	203636016	-		non-IFN			0.913824	0.906892	0.960733	0.877328	saddlebrown	brown	0.256199	0.178393	0.0778059	-1.08155	18.9652	0.125105	0.26005	0.665196	-0.0382095	0.205126	-0.395221	N	N	N	N
AC126365.1	ENSG00000226521.7	transcribed_unprocessed_pseudogene	chr17	20716481	20737127	+		non-IFN			0.982424	1.01241	0.96634	0.975453	tan	brown	0.169812	0.162798	0.00701453	0.0806376	14.6569	0.000494494	0.997063	0.999344	-0.173813	-0.0301722	-0.239727	N	N	N	N
AC127391.3	ENSG00000237085.2	processed_pseudogene	chr2	91859384	91859481	+		non-IFN			136.185	132.081	141.82	134.11	grey	blue	0.0792864	0.0347545	0.0445319	-0.455803	4.95709	0.0381001	0.814667	0.953102	-0.080477	-0.0943443	-0.136814	N	N	N	N
AC127904.2	ENSG00000230732.4	sense_intronic	chr3	196912646	196914579	+		non-IFN			3.23793	3.29577	2.9135	3.48336	grey	brown	0.19056	0.0598457	0.130715	1.47315	65.4575	-0.209505	0.184741	0.574441	0.0377694	0.0279205	0.238689	N	N	N	N
AC130469.1	ENSG00000279396.1	TEC	chr19	8575079	8576170	-		non-IFN			14.2005	12.5989	14.7667	14.8315	grey	green	0.145587	0.0637576	0.081829	0.0396618	223.592	-0.0270886	0.846447	0.961367	0.280618	0.385708	0.234884	N	N	N	N
AC131056.3	ENSG00000274767.1	antisense	chr17	36183235	36196471	+		non-IFN			6.14197	8.72229	4.83475	5.474	pink	magenta	0.0915638	0.109687	-0.0181235	0.275785	30.0476	-0.0945228	0.645214	0.89844	0.0459155	0.208954	-0.264895	N	N	N	N
AC131263.1	ENSG00000280550.1	protein_coding	chr11	33073925	33074214	-		non-IFN			20.8513	17.2587	22.0546	22.3256	turquoise	royalblue	0.100663	0.0374754	0.0631876	0.111344	7.61524	-0.0490428	0.740269	0.9299	0.193712	0.26502	0.229522	N	N	N	N
AC133644.2	ENSG00000280721.1	lincRNA	chr2	87439523	87459044	-		non-IFN			3.37985	2.85533	4.05955	3.15036	yellow	red	0.169876	0.0299899	0.139886	-2.05502	16.3491	0.414333	0.0336678	0.244478	0.0343469	-0.166172	0.164488	N	N	N	N
AC133644.3	ENSG00000214354.3	processed_pseudogene	chr2	87565828	87566764	-		non-IFN			0.889118	0.766076	0.914912	0.953212	paleturquoise	blue	0.159411	0.0443642	0.115047	0.409961	11.4617	-0.0664789	0.609942	0.886007	-0.0394318	0.12992	-0.134392	N	N	N	N
AC137932.5	ENSG00000260279.2	antisense	chr16	89297508	89298317	+		non-IFN			0.973789	0.936526	1.14695	0.847307	orange	green	0.10183	0.0192226	0.0826076	-1.2873	5.24557	0.255574	0.216707	0.619777	-0.00226432	-0.215875	0.0973213	N	N	N	N
AC138035.2	ENSG00000238035.8	lincRNA	chr5	181306502	181324685	+		non-IFN			1.95685	1.73019	2.25933	1.84995	yellow	green	0.144125	0.0412271	0.102898	-1.79793	26.2702	0.239039	0.0734763	0.378545	0.137266	0.0180132	0.196486	N	N	N	N
AC138517.4	ENSG00000249215.1	processed_pseudogene	chr5	139494256	139496116	+		non-IFN			3.84924	3.74606	3.87913	3.89569	red	blue	0.266921	0.336747	-0.069826	0.0422285	107.311	-0.0082222	0.942654	0.987677	0.0297266	0.346755	-0.203232	N	N	N	N
AC138649.1	ENSG00000277867.1	processed_pseudogene	chr15	22714939	22715225	+		non-IFN			5.83482	5.32737	5.49764	6.49054	brown	blue	0.254391	0.0501359	0.204255	0.999241	9.01232	-0.196124	0.252587	0.656516	-0.152667	0.0511126	-0.138716	N	N	N	N
AC138744.2	ENSG00000256826.1	processed_pseudogene	chr17	64491523	64491789	+		non-IFN			2.50032	1.86307	2.59572	2.86596	pink	turquoise	0.145753	0.131394	0.0143595	0.358444	4.76214	-0.196649	0.337738	0.730505	-0.0140498	-0.17201	0.132601	N	N	N	N
AC138969.4	ENSG00000183889.12	protein_coding	chr16	16317444	16350590	+	Nucleoplasm	non-IFN			1.76604	1.66028	1.81079	1.80122	royalblue	green	0.158605	0.0446649	0.11394	-0.0334235	18.1066	0.0284836	0.833171	0.957098	0.228646	0.136675	0.262039	N	N	N	N
AC140076.1	ENSG00000227309.1	processed_pseudogene	chr3	17465150	17465510	+		non-IFN			1.57461	1.30501	1.9422	1.44056	turquoise	green	0.230512	0.0474452	0.183067	-0.808646	5.35847	0.14626	0.430543	0.795551	0.0260666	-0.0628109	0.0219526	N	N	N	N
AC141586.5	ENSG00000215154.6	transcribed_unprocessed_pseudogene	chr16	2603350	2630494	+		non-IFN			9.18331	9.61283	8.33062	9.63249	orange	turquoise	0.131914	0.057672	0.074242	1.19427	200.306	-0.130544	0.312301	0.71191	-0.064098	-0.19049	0.165007	N	N	N	N
AC142472.6	ENSG00000276728.1	lincRNA	chr17	45146730	45148470	-		non-IFN			1.16711	1.05352	1.11333	1.29475	brown	blue	0.218861	0.206151	0.0127103	1.06109	32.0108	-0.235247	0.153995	0.532347	0.258641	0.296318	0.32863	N	N	N	N
AC144450.2	ENSG00000203635.2	lincRNA	chr2	1620510	1625419	-		non-IFN			0.940603	0.873114	0.930728	0.996957	lightcyan	green	0.257429	0.0774534	0.179976	0.984422	23.3305	-0.12521	0.206867	0.604654	0.340169	0.313205	0.506263	N	N	N	N
AC144530.1	ENSG00000234742.1	processed_pseudogene	chr3	197850400	197850954	-		non-IFN			5.16378	5.33583	4.92507	5.25296	black	brown	0.109136	0.0961942	0.0129418	0.934642	31.2031	-0.110127	0.324607	0.721312	-0.055004	-0.208503	0.156013	N	N	N	N
AC144652.1	ENSG00000273117.1	lincRNA	chr7	155295918	155297541	-		non-IFN			0.740698	0.885108	0.625835	0.740112	pink	magenta	0.103079	0.0514551	0.0516235	0.576861	16.5944	-0.0859605	0.671661	0.9076	0.0905914	0.132147	0.164716	N	N	N	N
AC147651.4	ENSG00000237181.1	antisense	chr7	603185	608482	+		non-IFN			4.38391	4.34538	5.14918	3.73586	darkturquoise	black	0.334989	0.0236239	0.311365	-1.95601	41.926	0.309321	0.0770042	0.388678	-0.182931	-0.212781	-0.345408	N	Y	N	N
AC195454.1	ENSG00000249241.1	lincRNA	chr4	40316485	40330419	+		non-IFN			2.07067	2.33426	2.01638	1.93252	brown	lightcyan	0.196887	0.0418302	0.155057	-0.1944	28.0845	-0.0203122	0.917775	0.982318	-0.061263	-0.0399713	-0.00899409	N	N	N	N
AC241377.1	ENSG00000281741.1	protein_coding	chr1	120913151	120914238	-		non-IFN			2.75235	2.63627	2.7257	2.85779	turquoise	turquoise	0.135489	0.0449352	0.0905537	0.781841	26.7194	-0.0537913	0.595191	0.880012	0.077519	0.140053	0.101011	N	N	N	N
AC241585.1	ENSG00000281571.1	protein_coding	chr1	145214851	145215938	+		non-IFN			3.4305	3.32654	3.50311	3.43982	lightyellow	grey	0.115519	0.0317159	0.0838035	-0.297672	32.3184	0.146542	0.164173	0.545448	0.239915	0.293841	0.231598	N	N	N	N
AC243945.1	ENSG00000279510.1	protein_coding	chr14	22638099	22638473	-		non-IFN			4.23925	3.48072	4.41925	4.61586	pink	lightcyan	0.140085	0.0528373	0.0872477	0.406932	13.2094	-0.0893743	0.512919	0.845406	0.305969	0.144331	0.482394	N	N	N	N
AC245100.1	ENSG00000280649.1	protein_coding	chr1	148458814	148459871	+		non-IFN			3.23869	2.90108	3.42808	3.30991	lightyellow	salmon	0.200985	0.0261094	0.174876	-0.55755	34.4524	0.0158743	0.879623	0.970936	0.193907	-0.00562914	0.37239	N	N	N	N
ACAA1	ENSG00000060971.17	protein_coding	chr3	38103129	38137242	-		non-IFN			73.0564	72.9525	73.8532	72.4267	grey	turquoise	0.100293	0.246748	-0.146455	-0.438645	1331.12	0.0177087	0.798384	0.948043	-0.257883	-0.466543	-0.163796	N	N	N	N
ACAA2	ENSG00000167315.17	protein_coding	chr18	49782167	49813960	-		non-IFN			46.3136	46.2614	44.1169	48.2888	darkgreen	blue	0.257338	0.0972741	0.160064	1.37935	975.039	-0.14635	0.0741628	0.380764	-0.154647	0.172477	-0.339873	N	N	N	N
ACACA	ENSG00000278540.4	protein_coding	chr17	37084988	37406818	-		non-IFN			1.53393	1.53337	1.71593	1.37373	cyan	grey	0.181857	0.0224363	0.159421	-0.707146	62.3236	0.00993052	0.957819	0.990918	-0.216325	-0.208053	-0.234019	N	N	N	N
ACAD10	ENSG00000111271.14	protein_coding	chr12	111686056	111757107	+		non-IFN			4.96581	4.6733	5.44081	4.75318	greenyellow	turquoise	0.264856	0.161825	0.103031	-1.4625	304.271	0.167606	0.151365	0.527465	-0.0923823	0.0130596	-0.310815	N	N	N	N
ACAD11	ENSG00000240303.7	protein_coding	chr3	132558138	132660723	-		non-IFN			1.77255	1.79084	1.49156	2.00757	turquoise	black	0.101786	0.0324661	0.0693196	1.89526	101.296	-0.229075	0.228005	0.63419	-0.0886909	-0.116411	0.154283	N	N	N	N
ACAD8	ENSG00000151498.11	protein_coding	chr11	134253495	134265855	+		non-IFN			9.78347	10.4514	8.53044	10.4176	darkgrey	blue	0.164864	0.160433	0.00443069	2.31744	313.82	-0.269753	0.0162708	0.151824	-0.184765	-0.192742	-0.0122804	N	N	N	N
ACAD9	ENSG00000177646.18	protein_coding	chr3	128879596	128916067	+		non-IFN			7.94148	7.77961	8.46244	7.59607	greenyellow	turquoise	0.1202	0.045589	0.0746113	-1.40291	293.405	0.12546	0.207374	0.605303	-0.00405807	-0.0882649	-0.00172963	N	N	N	N
ACADM	ENSG00000117054.13	protein_coding	chr1	75724347	75787575	+		non-IFN			18.9058	17.3708	19.3092	19.6334	grey	blue	0.106431	0.143545	-0.0371132	0.200858	490.189	-0.000829006	0.993695	0.998768	-0.214882	-0.292265	-0.132836	N	N	N	N
ACADS	ENSG00000122971.8	protein_coding	chr12	120725735	120740008	+		non-IFN			13.5842	14.33	13.5542	13.0842	royalblue	blue	0.244308	0.0496657	0.194642	-0.424903	380.534	0.0366264	0.737286	0.929608	0.0579865	0.276503	-0.179017	N	N	N	N
ACADSB	ENSG00000196177.12	protein_coding	chr10	123008979	123058311	+		non-IFN			5.38442	5.78438	4.54594	5.84193	grey	turquoise	0.136818	0.109297	0.0275217	1.78943	245.628	-0.169527	0.243839	0.648376	-0.235784	-0.178556	-0.182476	N	N	N	N
ACADVL	ENSG00000072778.19	protein_coding	chr17	7217125	7225273	+	Nucleus	non-IFN			138.172	143.72	131.121	140.477	black	blue	0.0883263	0.317311	-0.228984	1.50233	4794.55	-0.102646	0.119915	0.477896	-0.350661	-0.339362	-0.233327	N	N	N	N
ACAP1	ENSG00000072818.11	protein_coding	chr17	7336529	7351478	+	Golgi apparatus	non-IFN			19.7542	17.4101	22.1424	19.3016	cyan	purple	0.106412	0.036428	0.0699843	-1.53757	598.617	0.276857	0.00738782	0.0883857	0.202439	0.298795	0.042549	N	N	N	N
ACAP2	ENSG00000114331.13	protein_coding	chr3	195274736	195443078	-	Endosomes	non-IFN			30.5565	30.9734	29.8486	30.8868	red	turquoise	0.15594	0.11208	0.0438604	0.641426	2477.58	-0.00512996	0.93252	0.985576	0.0587198	0.255338	-0.0520619	N	N	N	N
ACAP3	ENSG00000131584.18	protein_coding	chr1	1292376	1309609	-	Golgi apparatus;Nucleoplasm	non-IFN			6.25219	5.9483	6.40591	6.33106	royalblue	turquoise	0.224012	0.184371	0.0396401	-0.124526	338.804	0.0163649	0.877242	0.970472	-0.205446	0.00405298	-0.407501	N	N	N	N
ACAT1	ENSG00000075239.13	protein_coding	chr11	108121516	108147776	+		non-IFN			14.6157	13.7342	16.6804	13.4163	turquoise	blue	0.17097	0.0483466	0.122623	-2.78165	377.881	0.281578	0.00794796	0.092869	0.119518	0.0479603	-0.0447975	N	N	N	N
ACAT2	ENSG00000120437.8	protein_coding	chr6	159760328	159779055	+	Nucleus	non-IFN			5.43594	5.18943	6.33511	4.81655	white	blue	0.161507	0.0563951	0.105111	-2.38009	244.558	0.352409	0.00708513	0.0854106	0.0286999	0.175179	-0.293692	N	N	N	N
ACBD3	ENSG00000182827.8	protein_coding	chr1	226144679	226186730	-		non-IFN			7.50165	7.63674	7.89233	7.06157	lightcyan	turquoise	0.102954	0.0495563	0.0533972	-1.67227	409.877	0.138615	0.119978	0.477968	-0.0833372	-0.199947	-0.189568	N	N	N	N
ACBD4	ENSG00000181513.14	protein_coding	chr17	45132600	45144181	+	Nucleus;Vesicles	non-IFN	Blood Pressure	Diagnostic Techniques and Procedures;Physical Examination	3.60519	3.73591	3.52227	3.58608	grey	turquoise	0.113796	0.0553902	0.0584062	0.157453	84.5008	-0.0415519	0.761592	0.936056	-0.00787169	-0.0738543	0.129549	N	N	N	N
ACBD5	ENSG00000107897.18	protein_coding	chr10	27195214	27242130	-		non-IFN			7.64156	7.62309	7.43739	7.83474	white	blue	0.128292	0.0816718	0.0466198	0.583115	394.51	0.0202623	0.865454	0.966223	-0.144453	0.0391788	-0.176595	N	N	N	N
ACBD6	ENSG00000230124.6	protein_coding	chr1	180269653	180502954	-	Nucleoplasm	non-IFN			12.3391	12.6292	12.1879	12.2678	purple	grey	0.107563	0.0247062	0.082857	0.0869989	303.597	-0.0290653	0.775921	0.941173	-0.0494547	-0.195444	0.125052	N	N	N	N
ACBD7	ENSG00000176244.6	protein_coding	chr10	15077523	15088776	-	Cytosol;Vesicles	non-IFN			1.36564	1.26108	1.44357	1.37068	black	green	0.212167	0.0500934	0.162074	-0.804514	26.2952	0.058297	0.507315	0.842632	0.371192	0.406649	0.347483	N	N	N	N
ACCS	ENSG00000110455.13	protein_coding	chr11	44065925	44084222	+	Golgi apparatus	non-IFN			4.73821	4.53074	3.8638	5.6562	turquoise	blue	0.136955	0.0307458	0.10621	2.36279	187.031	-0.390917	0.028731	0.221587	-0.0875175	0.134199	-0.0819846	N	N	N	N
ACD	ENSG00000102977.13	protein_coding	chr16	67657512	67660815	-		non-IFN			15.7041	16.0379	15.0496	16.0459	orangered4	turquoise	0.195038	0.14732	0.047718	0.678119	343.257	-0.0803297	0.502482	0.839505	0.0170635	0.0112583	0.100146	N	N	N	N
ACER3	ENSG00000078124.11	protein_coding	chr11	76860867	77026797	+		non-IFN			18.7054	18.1433	20.6464	17.3895	yellow	blue	0.1649	0.0492584	0.115642	-2.0171	795.917	0.217596	0.0259465	0.207562	0.0151811	0.0529139	-0.154456	N	N	N	N
ACIN1	ENSG00000100813.14	protein_coding	chr14	23058564	23095614	-		non-IFN			4.8518	4.35076	5.38751	4.73279	steelblue	grey	0.283207	0.0229413	0.260266	-2.05474	338.021	0.100269	0.278618	0.683195	0.062729	-0.377377	0.426008	N	Y	N	N
ACLY	ENSG00000131473.16	protein_coding	chr17	41866908	41930542	-		non-IFN			21.0055	19.9861	22.4456	20.4543	red	turquoise	0.373913	0.39499	-0.0210777	-1.4056	1401.78	0.122488	0.146795	0.520714	-0.01457	0.230119	-0.339873	N	N	N	N
ACO1	ENSG00000122729.18	protein_coding	chr9	32384603	32454769	+	Mitochondria	non-IFN			4.10593	4.73927	3.40946	4.27341	turquoise	turquoise	0.119538	0.139442	-0.0199035	2.30311	244.559	-0.233899	0.0519301	0.31217	-0.212095	-0.130596	-0.118999	N	N	N	N
ACO2	ENSG00000100412.15	protein_coding	chr22	41469125	41528989	+		non-IFN			17.9158	17.5883	18.5211	17.6128	skyblue	turquoise	0.174355	0.350667	-0.176312	-0.848422	695.524	0.0786886	0.365407	0.7526	-0.162494	0.0276954	-0.364433	N	N	N	N
ACOT1	ENSG00000184227.7	protein_coding	chr14	73537114	73543794	+	Mitochondria	non-IFN			1.36562	1.09665	1.67456	1.28288	yellow	blue	0.18702	0.0294484	0.157571	-1.53774	30.9122	0.234132	0.21749	0.620929	0.0373556	0.0803841	-0.110792	N	N	N	N
ACOT11	ENSG00000162390.17	protein_coding	chr1	54542257	54639192	+		non-IFN			0.977476	0.918769	1.03882	0.964792	turquoise	grey	0.227035	0.031873	0.195162	-0.720575	93.9565	0.162354	0.141725	0.51394	-0.120789	-0.219762	-0.0633045	N	N	N	N
ACOT13	ENSG00000112304.10	protein_coding	chr6	24667035	24705065	+	Cell Junctions	non-IFN			3.06193	2.9302	3.22451	3.01145	grey	turquoise	0.172976	0.0539833	0.118993	-0.744367	182.752	0.0576222	0.633583	0.894488	-0.0267931	0.0229669	-0.19147	N	N	N	N
ACOT2	ENSG00000119673.14	protein_coding	chr14	73567620	73575658	+	Mitochondria	non-IFN			2.15435	1.76343	2.62212	2.01757	yellow	blue	0.234595	0.0506408	0.183955	-1.52065	55.3097	0.260043	0.175183	0.563889	0.00767648	0.12992	-0.188978	N	N	N	N
ACOT8	ENSG00000101473.16	protein_coding	chr20	45841721	45857406	-	Mitochondria	non-IFN			22.9229	20.6264	22.9585	24.5124	black	darkgreen	0.126323	0.117568	0.00875541	0.859724	395.324	-0.09783	0.311019	0.710854	-0.313132	-0.200848	-0.375849	N	N	N	N
ACOT9	ENSG00000123130.16	protein_coding	chrX	23702253	23766475	-	Cytosol;Nucleoplasm;Plasma membrane	non-IFN			48.5103	43.7873	56.2536	45.0118	green	blue	0.137312	0.136762	0.000549989	-4.35053	1207.55	0.308077	5.27051e-07	3.01969e-05	0.107783	0.100424	-0.198562	Y	N	N	N
ACOX1	ENSG00000161533.11	protein_coding	chr17	75941507	75979363	-	Nucleus	non-IFN			12.407	12.0469	12.4273	12.6433	grey	turquoise	0.132536	0.254266	-0.12173	0.191993	837.686	-0.108615	0.22937	0.634663	-0.205886	-0.19747	-0.24163	N	N	N	N
ACOX3	ENSG00000087008.15	protein_coding	chr4	8366282	8440723	-	Peroxisomes	non-IFN			6.54814	6.72085	5.93556	6.96673	tan	turquoise	0.0982839	0.0606847	0.0375992	1.60559	248.735	-0.220895	0.0923794	0.422856	-0.0342247	0.248808	-0.176077	N	N	N	N
ACP1	ENSG00000143727.15	protein_coding	chr2	264140	278283	+	Cytosol;Nucleus	non-IFN			62.361	65.0971	60.5943	61.9886	red	blue	0.165529	0.153729	0.0117999	0.516728	1374.35	-0.0426959	0.438613	0.799299	0.0378428	0.238225	-0.094092	N	N	N	N
ACP2	ENSG00000134575.9	protein_coding	chr11	47239302	47248906	-		non-IFN	Acne Vulgaris	Skin and Connective Tissue Diseases	9.54359	8.925	11.1379	8.57349	darkorange	turquoise	0.140992	0.0817957	0.059196	-2.41825	304.748	0.355209	0.00500719	0.0663436	-0.0141788	-0.205351	-0.056213	N	N	N	N
ACP5	ENSG00000102575.10	protein_coding	chr19	11574660	11579008	-	Cytosol	non-IFN	S-(3-hydroxypropyl)cysteine N-acetate	Other	23.2653	19.4255	23.9769	25.3478	saddlebrown	grey	0.0967478	0.0283656	0.0683822	0.419633	332.716	-0.0698666	0.662071	0.90511	-0.112013	-0.092543	-0.0581156	N	N	N	N
ACP6	ENSG00000162836.11	protein_coding	chr1	147629652	147670496	-		non-IFN			1.00596	1.21988	0.666229	1.15471	cyan	red	0.189088	0.020857	0.168231	2.35733	43.8435	-0.551602	0.000788717	0.0163669	-0.114359	0.0650728	-0.0624397	Y	N	N	N
ACPP	ENSG00000014257.15	protein_coding	chr3	132317367	132368298	+		non-IFN			30.8328	29.8742	29.388	32.7843	sienna3	blue	0.220144	0.21992	0.000223892	1.55152	936.855	-0.129963	0.212228	0.613364	-0.363418	-0.252185	-0.355785	N	N	N	N
ACRBP	ENSG00000111644.7	protein_coding	chr12	6638075	6647460	-	Nucleoplasm;Vesicles	non-IFN			8.23303	8.04604	7.61973	8.90617	orange	blue	0.115671	0.0566789	0.0589924	1.50718	197.19	-0.177164	0.164811	0.546453	-0.230626	-0.000675496	-0.307183	N	N	N	N
ACSBG1	ENSG00000103740.9	protein_coding	chr15	78167468	78245688	-	Vesicles	non-IFN			5.68334	5.86942	5.6805	5.5545	greenyellow	brown	0.12789	0.176797	-0.048907	-0.347581	10.9678	0.183724	0.282602	0.68795	-0.203466	-0.0997483	-0.310296	N	N	N	N
ACSF2	ENSG00000167107.12	protein_coding	chr17	50426158	50474845	+	Cytosol;Microtubules;Nucleoplasm	non-IFN			1.62594	1.90004	1.52876	1.51822	turquoise	purple	0.127879	0.0192972	0.108581	-0.0392866	50.2179	-0.00605289	0.976536	0.994659	-0.215032	-0.484948	-0.0401409	N	N	N	N
ACSF3	ENSG00000176715.15	protein_coding	chr16	89088375	89155846	+		non-IFN			13.8867	13.7279	14.0253	13.8765	salmon	turquoise	0.132644	0.0426902	0.0899538	-0.149769	452.967	0.03294	0.730933	0.927452	-0.172541	-0.0229669	-0.314101	N	N	N	N
ACSL1	ENSG00000151726.13	protein_coding	chr4	184755595	184826818	-		non-IFN			53.6222	43.6242	67.3666	48.5522	grey60	darkgreen	0.185171	0.218215	-0.0330439	-3.43845	3390.27	0.443907	0.000100459	0.00309008	-0.159145	-0.0920927	-0.556423	Y	N	N	N
ACSL3	ENSG00000123983.13	protein_coding	chr2	222860934	222944639	+	Lipid droplets;Nucleoli	non-IFN			11.7719	10.4585	14.3555	10.4193	darkolivegreen	darkgreen	0.21611	0.0925342	0.123576	-3.99553	678.122	0.395266	0.000133893	0.00391208	-0.0603088	-0.0887152	-0.329841	Y	N	N	N
ACSL4	ENSG00000068366.19	protein_coding	chrX	109624244	109733403	-	Golgi apparatus;Mitochondria	non-IFN			13.0148	12.4219	15.212	11.4945	lightgreen	blue	0.243752	0.129269	0.114483	-4.18429	1080.42	0.372844	8.64293e-06	0.000361944	0.0170146	0.190715	-0.490351	Y	N	N	N
ACSL5	ENSG00000197142.10	protein_coding	chr10	112374018	112428380	+	Nucleus	non-IFN			13.3333	12.041	14.8023	12.9494	blue	blue	0.215631	0.116797	0.0988331	-1.5503	712.484	0.174912	0.100184	0.440558	-0.130201	-0.034	-0.318771	N	N	N	N
ACSS1	ENSG00000154930.14	protein_coding	chr20	25006230	25058980	-		non-IFN			15.6523	16.2595	14.9584	15.8359	yellow	turquoise	0.304997	0.17565	0.129346	0.719656	868.647	-0.0827082	0.44732	0.805021	-0.258592	-0.21796	-0.344716	N	N	N	N
ACSS2	ENSG00000131069.19	protein_coding	chr20	34872146	34927962	+	Vesicles	non-IFN			19.9041	18.6423	20.4136	20.3453	grey	turquoise	0.0984127	0.202521	-0.104108	-0.0575086	949.451	0.00156378	0.982951	0.995317	0.0557374	0.302848	-0.212399	N	N	N	N
ACTA1	ENSG00000143632.14	protein_coding	chr1	229431245	229434098	-		non-IFN			39.8812	37.9331	41.5167	39.8131	saddlebrown	turquoise	0.184705	0.410249	-0.225544	-1.31002	626.898	0.0514425	0.291112	0.694772	0.00584265	0.410252	-0.497788	N	N	N	N
ACTA2	ENSG00000107796.13	protein_coding	chr10	88935074	88991339	-		IFN			4.59332	3.49779	5.59556	4.48231	turquoise	turquoise	0.156337	0.0579156	0.0984212	-1.36613	58.6839	0.19157	0.314056	0.713028	-0.143328	-0.110331	-0.32223	N	N	N	N
ACTB	ENSG00000075624.13	protein_coding	chr7	5527151	5563784	-		non-IFN			8889.11	8525.79	9188.52	8881.38	saddlebrown	turquoise	0.310923	0.543195	-0.232272	-1.22167	259994	0.0381931	0.347086	0.737297	-0.0667626	0.321536	-0.504015	N	N	N	N
ACTBP11	ENSG00000188460.4	processed_pseudogene	chr1	223863726	223864851	-		non-IFN			79.6735	74.9522	82.3279	80.664	saddlebrown	blue	0.323904	0.506109	-0.182205	-0.595566	1261.77	0.0209516	0.671328	0.9076	-0.144526	0.16302	-0.48914	N	N	N	N
ACTBP2	ENSG00000213763.4	processed_pseudogene	chr5	77784881	77786003	+		non-IFN			320.755	304.257	332.337	322.18	saddlebrown	turquoise	0.2672	0.622575	-0.355375	-0.950226	5049.23	0.0362978	0.438309	0.799102	-0.0436854	0.316358	-0.53757	N	Y	N	N
ACTBP9	ENSG00000266920.1	processed_pseudogene	chr18	62442028	62443126	+		non-IFN			13.3597	12.4498	13.8171	13.5985	saddlebrown	turquoise	0.162937	0.620658	-0.457721	-0.424021	205.814	0.0223665	0.687338	0.911446	-0.177577	0.317709	-0.54345	N	Y	N	N
ACTG1	ENSG00000184009.9	protein_coding	chr17	81509971	81523847	-		non-IFN			573.021	554.563	581.942	578.18	yellow	turquoise	0.176861	0.229761	-0.0529003	-0.164016	17240.1	-0.00125665	0.982508	0.995317	-0.265853	-0.251735	-0.2866	N	N	N	N
ACTG1P1	ENSG00000178631.7	processed_pseudogene	chr3	139493809	139494937	+		non-IFN			2.07691	2.11785	1.99033	2.12442	tan	turquoise	0.208493	0.123998	0.0844954	0.774109	32.145	-0.110589	0.304138	0.706638	-0.151298	-0.120464	-0.140792	N	N	N	N
ACTG1P10	ENSG00000231340.1	processed_pseudogene	chrX	53142832	53143913	-		non-IFN			145.01	139.485	148.59	145.751	saddlebrown	turquoise	0.354847	0.735423	-0.380576	-0.549034	4.1526	-0.311738	0.128784	0.493859	-0.178115	0.231245	-0.513355	N	Y	N	N
ACTG1P14	ENSG00000230581.2	processed_pseudogene	chr9	6834456	6835577	+		non-IFN			24.8231	23.731	25.6909	24.8284	saddlebrown	turquoise	0.247824	0.407665	-0.159841	-0.949687	391.079	0.0393809	0.454261	0.80925	-0.168703	0.219987	-0.621284	N	N	N	N
ACTG1P20	ENSG00000241547.1	processed_pseudogene	chr1	27325329	27325796	+		non-IFN			5.84762	5.55569	5.91322	5.99581	steelblue	grey	0.15687	0.0209951	0.135874	0.195392	27.4921	-0.0661996	0.549115	0.863383	-0.134112	-0.282808	-0.0259445	N	N	N	N
ACTG1P23	ENSG00000230362.1	processed_pseudogene	chr3	175977497	175978570	-		non-IFN			48.1601	45.991	50.3901	47.7237	saddlebrown	turquoise	0.308557	0.382739	-0.0741813	-1.67959	716.143	0.0671137	0.16602	0.548087	-0.0179435	0.330318	-0.541029	N	N	N	N
ACTG1P9	ENSG00000229349.2	processed_pseudogene	chr6	46204729	46207386	+		non-IFN			2.50773	2.34544	2.52189	2.6098	saddlebrown	turquoise	0.135684	0.121818	0.0138664	0.824092	106.113	-0.0594609	0.324153	0.721181	-0.234122	-0.111682	-0.332089	N	N	N	N
ACTL10	ENSG00000182584.4	protein_coding	chr20	33666498	33668525	+		non-IFN			0.775152	0.645775	1.04718	0.626451	grey	turquoise	0.11412	0.0476339	0.0664862	-2.37134	25.036	0.403748	0.0495188	0.304718	0.105395	0.0557906	0.00129733	N	N	N	N
ACTL6A	ENSG00000136518.16	protein_coding	chr3	179562880	179588408	+		non-IFN			15.2071	17.5227	14.1405	14.5138	red	yellow	0.200804	0.10007	0.100734	0.255568	350.212	-0.0493843	0.71321	0.921531	-0.102601	-0.0623708	-0.161894	N	N	N	N
ACTN1	ENSG00000072110.13	protein_coding	chr14	68874143	68979440	-	Focal adhesion sites;Plasma membrane	non-IFN			35.322	33.8929	35.6274	36.0613	red	turquoise	0.196749	0.388164	-0.191415	0.194013	1878.05	-0.0192581	0.822793	0.95441	-0.0481346	0.332119	-0.37239	N	N	N	N
ACTN4	ENSG00000130402.11	protein_coding	chr19	38647649	38731583	+	Cytosol;Nuclear bodies	non-IFN			14.9669	14.0526	16.0191	14.6838	blue	turquoise	0.185039	0.245135	-0.0600961	-1.31388	795.395	0.11614	0.156458	0.53485	-0.0648314	-0.0423311	-0.200637	N	N	N	N
ACTR10	ENSG00000131966.13	protein_coding	chr14	58200080	58235636	+		non-IFN			40.9197	42.4981	41.6139	39.1929	blue	yellow	0.292553	0.380215	-0.087662	-0.866759	1505.42	0.0725248	0.372821	0.758239	-0.0651248	0.0414305	-0.21361	N	N	N	N
ACTR1A	ENSG00000138107.12	protein_coding	chr10	102461881	102502711	-	Microtubules	non-IFN	Blood Pressure	Diagnostic Techniques and Procedures;Physical Examination	29.9136	27.6894	33.112	28.6615	turquoise	turquoise	0.323523	0.188476	0.135047	-2.35608	1275.1	0.196777	0.0106491	0.11437	0.108223	0.065298	0.0382249	N	N	N	N
ACTR1B	ENSG00000115073.7	protein_coding	chr2	97655963	97664107	-	Microtubules	non-IFN			16.0768	16.0057	14.1247	17.8495	cyan	turquoise	0.134346	0.0872827	0.047063	3.63645	562.268	-0.324145	0.00035042	0.00865878	-0.25935	-0.0961457	-0.148921	Y	N	N	N
ACTR2	ENSG00000138071.13	protein_coding	chr2	65227753	65271253	+	Cytosol	non-IFN			85.5417	85.9454	83.0656	87.4414	paleturquoise	blue	0.289146	0.293334	-0.00418753	0.98345	3759.53	-0.0266879	0.618818	0.889541	-0.110619	0.246556	-0.296286	N	N	N	N
ACTR3	ENSG00000115091.11	protein_coding	chr2	113889960	113962596	+		non-IFN			318.153	321.284	326.921	308.207	blue	blue	0.442995	0.791456	-0.348461	-0.953955	9135	0.108981	0.131912	0.498916	-0.170977	-0.00743046	-0.426354	N	Y	N	N
ACTR3B	ENSG00000133627.17	protein_coding	chr7	152759749	152855378	+		non-IFN			1.58952	1.2821	1.5724	1.82162	turquoise	grey	0.829218	0.0256524	0.803565	0.660536	48.2884	-0.149993	0.433633	0.796959	-0.161125	-0.358914	0.170196	N	Y	N	N
ACTR3C	ENSG00000106526.10	protein_coding	chr7	150243916	150323725	-		non-IFN			1.99883	1.7528	1.97031	2.19767	turquoise	grey	0.133475	0.0144701	0.119005	0.705188	36.6758	-0.0474762	0.719419	0.923618	0.0319023	0.0812847	0.0307875	N	N	N	N
ACTR5	ENSG00000101442.9	protein_coding	chr20	38748442	38772520	+		non-IFN	Schizophrenia	Mental Disorders;Other	4.63086	4.97652	4.53969	4.46732	salmon	blue	0.133399	0.0373068	0.0960921	-0.14757	180.636	0.00417075	0.976981	0.994939	-0.222534	-0.228543	-0.259791	N	N	N	N
ACTR6	ENSG00000075089.9	protein_coding	chr12	100199122	100241865	+	Cytosol;Plasma membrane	non-IFN			9.37725	9.38238	9.43501	9.32266	brown	grey	0.0988625	0.0218621	0.0770004	-0.138206	246.097	-0.00449079	0.969254	0.993746	-0.0629001	-0.179007	0.0522349	N	N	N	N
ACTR8	ENSG00000113812.13	protein_coding	chr3	53867066	53882202	-	Centrosome	non-IFN			4.52698	4.66766	4.79165	4.19415	turquoise	yellow	0.208978	0.0388891	0.170089	-1.00081	170.883	0.135115	0.344941	0.735376	-0.188065	-0.365444	-0.0887301	N	N	N	N
ACVR1	ENSG00000115170.13	protein_coding	chr2	157736444	157875862	-	Cytosol;Nucleoli	non-IFN			2.12451	1.68705	2.51939	2.08489	grey	blue	0.0785187	0.07796	0.000558772	-1.30846	100.89	0.217931	0.187549	0.579163	-0.180633	-0.334596	-0.160856	N	N	N	N
ACVR1B	ENSG00000135503.12	protein_coding	chr12	51951667	51997078	+		non-IFN			2.43141	2.12354	2.75998	2.35881	pink	tan	0.355843	0.0338743	0.321968	-0.853076	110.517	0.227452	0.179743	0.568995	-0.0797925	-0.00157616	-0.274493	N	Y	N	N
ACVR2A	ENSG00000121989.14	protein_coding	chr2	147844517	147930826	+	Cytosol	non-IFN	Uric Acid	Chemicals and Drugs Category	4.50334	4.6261	4.52123	4.4009	brown	grey	0.288181	0.0203172	0.267863	-0.192869	187.343	-0.044878	0.775247	0.940972	0.226274	0.250384	0.180401	N	Y	N	N
ACVRL1	ENSG00000139567.12	protein_coding	chr12	51906908	51923361	+		non-IFN			1.28532	1.3229	1.53837	1.03553	grey	blue	0.0988892	0.0571058	0.0417834	-1.79373	50.3892	0.342948	0.0904306	0.419012	-0.100671	-0.231695	-0.100319	N	N	N	N
ACY1	ENSG00000243989.8	protein_coding	chr3	51983278	51989202	+		non-IFN			10.0233	10.7013	9.56459	9.94953	turquoise	brown	0.504735	0.118576	0.386159	0.388456	17.2915	0.0360531	0.786558	0.943355	-0.0759544	-0.0358013	-0.0434138	N	Y	N	N
ACYP1	ENSG00000119640.8	protein_coding	chr14	75053221	75069483	-	Cytosol;Nucleus	non-IFN			6.17636	5.82489	6.55837	6.08737	greenyellow	purple	0.14856	0.0446955	0.103865	-0.491512	44.3454	0.0484195	0.773745	0.940285	-0.00398474	-0.0968212	0.127474	N	N	N	N
ACYP2	ENSG00000170634.12	protein_coding	chr2	53970838	54305300	+	Nucleoplasm	non-IFN	Circadian Rhythm	Other	10.7705	10.766	9.91917	11.5249	purple	grey	0.113013	0.0371779	0.0758355	2.23239	128.746	-0.209427	0.0458074	0.290545	-0.0141055	-0.154914	0.248375	N	N	N	N
AD000671.6	ENSG00000267120.3	protein_coding	chr19	35739252	35745432	-		non-IFN			4.0729	4.28622	4.53445	3.51506	tan	turquoise	0.090608	0.0369282	0.0536798	-3.11453	4.03626	-0.0157606	0.935987	0.986243	0.308585	0.0261192	0.337278	N	N	N	N
AD000864.6	ENSG00000280194.1	TEC	chr19	35901561	35903855	-		non-IFN			3.02169	3.55104	2.83744	2.8106	grey60	turquoise	0.130961	0.0680434	0.0629173	-0.0957544	77.7946	0.0292121	0.833774	0.95719	0.199261	0.352384	0.032863	N	N	N	N
AD001527.4	ENSG00000279504.1	TEC	chr19	36114362	36115146	+		non-IFN			4.30063	4.57368	3.97932	4.3914	turquoise	blue	0.181999	0.030549	0.15145	1.31937	3.07144	-0.186053	0.365676	0.752756	-0.270938	-0.351934	0.0313063	N	N	N	N
ADA	ENSG00000196839.12	protein_coding	chr20	44619522	44652233	-	Cytosol	non-IFN			7.75831	8.17292	8.4429	6.86159	purple	purple	0.12997	0.0375754	0.0923946	-1.59561	157.289	0.235468	0.139685	0.511344	0.192636	-0.0891655	0.30701	N	N	N	N
ADAL	ENSG00000168803.14	protein_coding	chr15	43330674	43354555	+	Microtubules	non-IFN	Neoplasms	Neoplasms	1.4695	1.41968	1.6068	1.38352	greenyellow	red	0.121959	0.0238967	0.0980618	-0.585496	39.7262	0.048436	0.814882	0.953102	-0.0669054	-0.158346	0.0788712	N	N	N	N
ADAM10	ENSG00000137845.14	protein_coding	chr15	58588807	58749978	-		non-IFN			50.6624	50.1704	52.9419	48.9984	red	blue	0.318691	0.407017	-0.0883268	-1.08876	4450.79	0.0871795	0.313493	0.712792	-0.103872	0.296093	-0.604679	N	N	N	N
ADAM15	ENSG00000143537.13	protein_coding	chr1	155050566	155062775	+		non-IFN			47.8046	48.255	45.5906	49.4402	saddlebrown	brown	0.145366	0.23311	-0.0877433	1.35831	2029.9	-0.109648	0.226078	0.632086	-0.152813	0.157616	-0.36599	N	N	N	N
ADAM17	ENSG00000151694.12	protein_coding	chr2	9488486	9555792	-		non-IFN			27.8335	26.012	28.7611	28.3008	lightgreen	blue	0.17023	0.0939848	0.0762455	-0.251481	698.743	0.0695516	0.50068	0.838516	-0.0149122	0.185536	-0.251143	N	N	N	N
ADAM19	ENSG00000135074.15	protein_coding	chr5	157395534	157575775	-	Vesicles	non-IFN			5.44768	5.34156	5.25811	5.68986	purple	darkgreen	0.115809	0.0401931	0.0756159	0.822914	584.695	-0.127346	0.285112	0.690384	0.0217327	0.374	-0.181092	N	N	N	N
ADAM28	ENSG00000042980.12	protein_coding	chr8	24294040	24359018	+	Mitochondria	non-IFN			5.19565	5.02024	4.88847	5.59052	brown	blue	0.144	0.0807207	0.0632798	1.01264	240.172	-0.157951	0.32142	0.719705	0.123209	0.246556	0.0624397	N	N	N	N
ADAM8	ENSG00000151651.15	protein_coding	chr10	133262403	133276868	-		non-IFN			39.5143	37.4914	42.7166	38.1166	yellow	turquoise	0.164018	0.0742271	0.0897908	-1.43037	2020.43	0.151178	0.181843	0.571487	-0.00413141	-0.0700265	-0.0684934	N	N	N	N
ADAM9	ENSG00000168615.11	protein_coding	chr8	38996869	39105144	+	Endoplasmic reticulum;Vesicles	non-IFN			15.454	14.8736	16.0616	15.3274	yellow	brown	0.316015	0.110887	0.205128	-0.498184	949.355	0.058261	0.614188	0.888149	-0.0866374	-0.0562914	-0.11848	N	N	N	N
ADAMDEC1	ENSG00000134028.14	protein_coding	chr8	24384285	24406013	+		non-IFN			1.10578	1.11057	0.961827	1.22942	blue	grey	0.199582	0.0345876	0.164994	0.812593	36.1498	-0.136232	0.484242	0.827911	-0.158903	-0.124343	-0.113386	N	N	N	N
ADAMTSL4	ENSG00000143382.14	protein_coding	chr1	150549369	150560937	+	Cytosol;Plasma membrane	non-IFN			11.9487	10.7844	13.9768	10.981	green	blue	0.207769	0.188011	0.0197581	-3.60379	795.21	0.324312	0.000466379	0.0108796	0.0382095	-0.0860132	-0.129376	Y	N	N	N
ADAMTSL4-AS1	ENSG00000203804.4	processed_transcript	chr1	150560202	150574552	-		non-IFN			2.85047	2.56916	3.03209	2.88879	turquoise	magenta	0.110208	0.0888616	0.0213462	-0.436244	47.66	0.0736812	0.598722	0.881138	-0.108663	-0.180808	-0.116577	N	N	N	N
ADAP1	ENSG00000105963.13	protein_coding	chr7	897901	955407	-	Plasma membrane	non-IFN			28.0592	27.7644	27.7324	28.5558	black	red	0.365166	0.16837	0.196796	0.317997	951.358	-0.0517063	0.704848	0.918874	-0.119518	-0.0204901	-0.163796	N	N	N	N
ADAP2	ENSG00000184060.10	protein_coding	chr17	30906344	30959322	+		non-IFN			26.398	21.998	30.2076	26.1424	turquoise	turquoise	0.303212	0.212087	0.0911249	-2.21556	1028.15	0.179476	0.0205105	0.176565	0.037745	0.237775	-0.362704	N	N	N	N
ADAR	ENSG00000160710.15	protein_coding	chr1	154582062	154627999	-		IFN			33.5062	26.5954	47.6048	25.9446	green	blue	0.292092	0.287983	0.00410897	-9.55787	3883.77	0.841251	5.44989e-27	1.80409e-24	0.32115	0.267271	-0.0584616	Y	N	N	N
ADAT1	ENSG00000065457.10	protein_coding	chr16	75596981	75623300	-		non-IFN			4.23831	4.64179	3.69741	4.43077	grey	turquoise	0.14093	0.0922075	0.0487221	1.53677	106.821	-0.181216	0.300642	0.70268	-0.236126	-0.334596	-0.0978972	N	N	N	N
ADAT2	ENSG00000189007.15	protein_coding	chr6	143422832	143450673	-	Cytosol;Golgi apparatus;Nucleoplasm	non-IFN			0.765433	0.749769	0.754334	0.786283	paleturquoise	black	0.127366	0.0369498	0.0904164	0.200892	40.8997	0.00219179	0.990724	0.998142	-0.117097	-0.0610198	-0.0546564	N	N	N	N
ADAT3	ENSG00000213638.5	protein_coding	chr19	1905378	1913447	+	Nucleus	non-IFN			1.99379	1.81835	2.35905	1.79534	royalblue	turquoise	0.13907	0.0341468	0.104923	-1.97969	48.3025	0.318169	0.0571294	0.328409	0.12448	0.154689	-0.01401	N	N	N	N
ADCK1	ENSG00000063761.15	protein_coding	chr14	77800083	77935012	+	Nucleoplasm	non-IFN			2.48574	2.93155	2.42979	2.22041	grey	grey	0.0893574	0.0501306	0.0392268	-0.51087	76.9011	0.068157	0.7307	0.92727	-0.0229797	0.281713	-0.303377	N	N	N	N
ADCK2	ENSG00000133597.9	protein_coding	chr7	140673153	140696261	+		non-IFN			5.55362	5.37836	5.46132	5.75878	tan	pink	0.135102	0.0517223	0.0833796	0.546302	191.588	-0.0919052	0.495058	0.83531	-0.090011	0.0569669	-0.190087	N	N	N	N
ADCK3	ENSG00000163050.16	protein_coding	chr1	226897536	226987545	+		non-IFN			13.2172	14.5094	11.3541	13.9489	brown	turquoise	0.155236	0.181111	-0.0258748	2.60621	580.749	-0.279947	0.00800822	0.0934586	-0.185938	-0.00878145	-0.11675	N	N	N	N
ADCK4	ENSG00000123815.11	protein_coding	chr19	40691529	40718207	-		non-IFN			10.3711	10.1161	10.0259	10.8557	grey	blue	0.100978	0.296526	-0.195547	0.866182	360.415	-0.0958713	0.427955	0.794181	-0.234855	0.131947	-0.487064	N	N	N	N
ADCK5	ENSG00000173137.11	protein_coding	chr8	144373101	144393242	+	Cytosol;Plasma membrane	non-IFN			6.03863	6.64271	5.70872	5.90331	pink	grey	0.137149	0.0525128	0.0846359	0.326415	173.36	-0.0507891	0.719083	0.923618	0.0237373	-0.0544901	0.116058	N	N	N	N
ADCY7	ENSG00000121281.12	protein_coding	chr16	50246137	50318135	+	Cytosol	non-IFN			13.4636	13.2946	13.7896	13.2952	darkolivegreen	turquoise	0.134107	0.567344	-0.433237	-0.538186	920.638	0.0378958	0.704187	0.918649	-0.041803	0.240702	-0.387092	N	Y	N	N
ADD1	ENSG00000087274.16	protein_coding	chr4	2843857	2930076	+		non-IFN			25.789	26.7645	24.0249	26.6568	grey	turquoise	0.0676005	0.429602	-0.362001	1.87735	1475.43	-0.112585	0.110364	0.461234	-0.218011	0.0767814	-0.268093	N	Y	N	N
ADD3	ENSG00000148700.14	protein_coding	chr10	109996368	110135565	+		non-IFN	Bipolar Disorder	Mental Disorders	49.4689	50.9773	50.3246	47.649	green	brown	0.287696	0.414984	-0.127287	-0.919101	2550.91	0.103059	0.162704	0.543568	-0.090011	0.275603	-0.475303	N	N	N	N
ADD3-AS1	ENSG00000203876.9	processed_transcript	chr10	109940104	110008381	-		non-IFN			1.53073	1.48082	1.58418	1.5188	greenyellow	turquoise	0.10515	0.123473	-0.0183227	-0.455114	13.441	-0.0103697	0.927718	0.98403	-0.0351292	-0.0774569	-0.0309604	N	N	N	N
ADGRD1	ENSG00000111452.12	protein_coding	chr12	130953907	131141469	+	Cytosol;Nucleus	non-IFN			1.63643	1.83331	1.53825	1.58409	turquoise	grey	0.306568	0.0282112	0.278357	0.186174	103.617	-0.107276	0.561963	0.868415	-0.056373	0.0135099	-0.0747201	N	Y	N	N
ADGRE1	ENSG00000174837.14	protein_coding	chr19	6887566	6940459	+		non-IFN			9.39779	8.65695	11.4144	8.14141	white	grey	0.233978	0.0298661	0.204112	-2.20582	440.355	0.390042	0.0146193	0.141873	0.302058	0.298344	0.150132	N	N	N	N
ADGRE2	ENSG00000127507.17	protein_coding	chr19	14732393	14778541	-	Vesicles	non-IFN			19.5598	19.1364	19.5513	19.8661	pink	black	0.203643	0.132407	0.071236	0.226427	1086.71	0.00282548	0.975958	0.994298	0.0153767	-0.0256689	0.20081	N	N	N	N
ADGRE3	ENSG00000131355.14	protein_coding	chr19	14619117	14690027	-		non-IFN			13.2305	15.4343	8.39614	15.9404	turquoise	grey60	0.0865981	0.0481188	0.0384793	3.9584	365.576	-0.690331	0.000157063	0.00445657	-0.204859	-0.276728	0.147019	Y	N	N	N
ADGRE5	ENSG00000123146.19	protein_coding	chr19	14380501	14408725	+	Cytosol	non-IFN			69.1836	64.573	72.7112	69.3254	yellow	blue	0.164099	0.126583	0.0375164	-0.780456	3237.54	0.054703	0.510144	0.843834	0.0585487	0.202649	-0.120728	N	N	N	N
ADH5	ENSG00000197894.10	protein_coding	chr4	99070978	99088801	-		non-IFN			22.5778	22.0704	23.1309	22.4478	brown	blue	0.200475	0.0521155	0.14836	-0.495414	570.941	0.0471707	0.562999	0.868531	0.0978338	0.297894	-0.132663	N	N	N	N
ADH5P4	ENSG00000233859.2	processed_pseudogene	chr6	65836930	65838039	-		non-IFN			1.9166	1.94089	1.85199	1.95645	brown	blue	0.224966	0.0397039	0.185263	0.654183	29.0745	-0.0868664	0.416559	0.789896	0.0325379	0.242503	-0.100492	N	N	N	N
ADHFE1	ENSG00000147576.15	protein_coding	chr8	66430185	66471601	+	Vesicles	non-IFN			9.00994	8.52861	8.95688	9.39653	grey	blue	0.097058	0.0830009	0.0140571	0.362584	298.088	-0.0407883	0.808778	0.951618	-0.131814	-0.354185	0.231598	N	N	N	N
ADI1	ENSG00000182551.13	protein_coding	chr2	3497361	3519736	-	Golgi apparatus	non-IFN			60.9891	63.5241	55.8588	63.7265	grey	turquoise	0.192974	0.198466	-0.0054914	2.65998	2181.74	-0.191522	0.00318901	0.0473357	-0.266048	0.0533642	-0.340392	Y	N	N	N
ADIPOR1	ENSG00000159346.12	protein_coding	chr1	202940823	202958572	-		non-IFN			143.44	136.454	144.763	147.205	red	blue	0.288081	0.664311	-0.37623	0.301584	4525.29	-0.0173214	0.799752	0.948575	-0.141275	0.249709	-0.411652	N	Y	N	N
ADIPOR2	ENSG00000006831.9	protein_coding	chr12	1688574	1788678	+		non-IFN			4.05883	3.75966	3.93838	4.37628	black	magenta	0.184882	0.023633	0.161249	1.21138	273.041	-0.141398	0.270503	0.674722	-0.0455433	0.0389536	-0.0313063	N	N	N	N
ADK	ENSG00000156110.13	protein_coding	chr10	74151185	74709303	+		non-IFN	Inflammatory Bowel Diseases	Digestive System Diseases	30.0454	28.7463	30.1765	30.8468	grey	grey	0.10904	0.0197962	0.089244	0.139216	623.346	-0.0152177	0.927737	0.98403	-0.044101	0.133523	-0.186973	N	N	N	N
ADM	ENSG00000148926.9	protein_coding	chr11	10304680	10307397	+		non-IFN			21.3462	17.8467	27.8902	18.0424	yellow	darkgrey	0.241622	0.0510899	0.190532	-2.61915	463.738	0.492832	0.00308411	0.0461731	0.00393584	0.0560662	-0.241111	Y	N	N	N
ADNP	ENSG00000101126.15	protein_coding	chr20	50888919	50931240	-	Nucleoplasm	non-IFN			4.58868	4.5905	4.82414	4.37964	lightgreen	green	0.214145	0.0696867	0.144458	-1.04619	447.437	0.101918	0.373498	0.7586	0.111401	0.123166	0.13076	N	N	N	N
ADNP2	ENSG00000101544.8	protein_coding	chr18	80109031	80147523	+	Cytosol;Mitochondria	non-IFN			0.775385	0.744262	0.812144	0.76492	pink	yellow	0.111882	0.03755	0.0743321	-0.297776	69.0338	0.0273855	0.893377	0.975419	0.205766	0.129485	0.301302	N	N	N	N
ADNP-AS1	ENSG00000259456.3	antisense	chr20	50930984	50945134	+		non-IFN			0.672494	0.653614	0.608157	0.74259	darkorange	royalblue	0.0729298	0.0217058	0.0512241	0.723295	8.70165	-0.0889905	0.654735	0.901376	-0.0320505	0.197088	-0.229735	N	N	N	N
ADO	ENSG00000181915.4	protein_coding	chr10	62804857	62808483	+		non-IFN			2.6178	2.66649	2.53799	2.65385	brown	turquoise	0.133957	0.0531605	0.0807961	0.317571	141.784	-0.039469	0.817362	0.953486	-0.168972	-0.165497	-0.214647	N	N	N	N
ADORA2B	ENSG00000170425.3	protein_coding	chr17	15944917	15975746	+		non-IFN			3.98923	4.25952	3.55904	4.17801	grey	turquoise	0.0945163	0.0743469	0.0201693	1.01243	101.722	-0.153541	0.401037	0.778297	-0.197134	-0.124742	-0.217242	N	N	N	N
ADORA3	ENSG00000282608.1	protein_coding	chr1	111499429	111503760	-		non-IFN			1.38997	1.39191	1.49416	1.29668	orange	greenyellow	0.193382	0.0319771	0.161405	-0.497287	29.2543	0.0439679	0.823989	0.954471	-0.202756	-0.189841	-0.240431	N	N	N	N
ADPGK	ENSG00000159322.17	protein_coding	chr15	72751369	72785846	-	Centrosome	non-IFN	Body Mass Index	Body Weights and Measures;Diagnostic Techniques and Procedures;Physical Examination	103.065	106.697	107.379	96.6952	red	blue	0.234244	0.672002	-0.437758	-2.10634	2780.39	0.156371	0.0084121	0.0962442	0.00415586	0.114609	-0.27899	N	Y	N	N
ADPGK-AS1	ENSG00000260898.5	antisense	chr15	72782835	72798199	+		non-IFN			4.63681	4.93959	4.47509	4.56578	purple	turquoise	0.18836	0.239227	-0.0508661	0.319924	71.5562	-0.232916	0.06598	0.355469	-0.0639024	-0.0833112	-0.02802	N	N	N	N
ADPRH	ENSG00000144843.11	protein_coding	chr3	119579268	119589945	+	Nuclear membrane;Nucleus	non-IFN			10.0539	9.43996	11.5752	9.14493	darkgreen	blue	0.172476	0.125664	0.0468119	-2.70935	513.661	0.318028	0.0030622	0.0459132	-0.188505	-0.268848	-0.298189	Y	N	N	N
ADPRHL2	ENSG00000116863.10	protein_coding	chr1	36088875	36093932	+		non-IFN			19.4637	17.0695	24.4801	16.7274	blue	yellow	0.363482	0.0598779	0.303604	-4.33216	500.264	0.499382	2.043e-06	0.000101845	0.0734609	-0.188238	0.0695312	Y	Y	Y	Y
ADPRM	ENSG00000170222.11	protein_coding	chr17	10697594	10711233	+		non-IFN			5.37867	5.13212	6.22114	4.80934	grey	red	0.138343	0.0382489	0.100094	-1.96332	93.0476	0.294333	0.0902147	0.418828	0.184985	0.12204	0.142868	N	N	N	N
ADRB2	ENSG00000169252.5	protein_coding	chr5	148825245	148828687	+		non-IFN			5.2508	3.98651	5.9954	5.48624	turquoise	yellow	0.419592	0.112654	0.306937	-0.589452	310.976	0.104319	0.534313	0.856039	-0.19117	-0.0956953	-0.333646	N	Y	N	N
ADRM1	ENSG00000130706.12	protein_coding	chr20	62302093	62308862	+	Plasma membrane	non-IFN			59.544	58.6944	63.224	56.8966	lightyellow	turquoise	0.248958	0.472095	-0.223138	-2.31413	1169.92	0.137678	0.0147152	0.142265	0.0216838	0.159868	-0.286081	N	N	N	N
ADSL	ENSG00000239900.12	protein_coding	chr22	40346500	40390463	+		non-IFN			21.6205	22.4247	20.8092	21.7686	grey	blue	0.124245	0.240336	-0.116091	0.716025	552.116	-0.0692717	0.473198	0.820328	-0.176233	-0.12294	-0.162067	N	N	N	N
ADSS	ENSG00000035687.9	protein_coding	chr1	244408494	244452134	-	Plasma membrane	non-IFN			15.6585	15.5057	16.5256	15.0012	blue	blue	0.14463	0.0460834	0.0985466	-1.63446	622.79	0.115263	0.154694	0.532805	-0.114359	-0.238675	-0.189395	N	N	N	N
ADSSL1	ENSG00000185100.10	protein_coding	chr14	104724186	104747325	+		non-IFN			0.888696	1.00365	0.634045	1.03225	purple	yellow	0.0932345	0.0325745	0.0606601	2.0741	20.4507	-0.306983	0.120434	0.478467	0.0192353	-0.0603632	0.340437	N	N	N	N
AE000658.25	ENSG00000256081.2	processed_pseudogene	chr14	21585290	21586280	-		non-IFN			0.984924	1.02719	1.00069	0.941176	blue	blue	0.206188	0.33199	-0.125802	-0.613283	12.7335	0.0767809	0.562501	0.868415	-0.159609	0.0358013	-0.36305	N	N	N	N
AE000658.30	ENSG00000256350.1	unprocessed_pseudogene	chr14	21698954	21699151	-		non-IFN			6.97212	7.62289	6.99766	6.49023	grey60	grey	0.111736	0.0256496	0.0860861	-0.397071	3.14793	0.0716732	0.716492	0.923056	-0.199035	-0.287664	-0.139644	N	N	N	N
AEBP2	ENSG00000139154.14	protein_coding	chr12	19404045	19720801	+		non-IFN			5.34173	5.57361	4.90139	5.56659	pink	tan	0.117124	0.0769027	0.0402217	1.25605	292.094	-0.145438	0.249498	0.653186	-0.0460811	0.108305	-0.00830223	N	N	N	N
AEN	ENSG00000181026.14	protein_coding	chr15	88621296	88632282	+		IFN	Thyrotropin	Chemicals and Drugs Category	2.25881	2.13959	2.73367	1.92396	grey	greenyellow	0.09971	0.0326008	0.0671093	-2.35242	114.723	0.359181	0.0463908	0.292644	-0.0261819	-0.146132	-0.0740283	N	N	N	N
AES	ENSG00000104964.14	protein_coding	chr19	3052910	3063107	-		non-IFN			21.7864	19.6667	23.9652	21.3602	black	red	0.25316	0.0420921	0.211068	-1.32585	355.553	0.116239	0.312351	0.71191	0.219063	0.229894	0.115885	N	N	N	N
AF001548.5	ENSG00000263335.1	antisense	chr16	15726674	15732993	+		non-IFN			4.49532	3.81968	4.4516	5.01081	greenyellow	grey	0.212983	0.0298052	0.183177	0.618095	29.9693	-0.100482	0.607152	0.8848	0.092529	0.390662	-0.0672827	N	N	N	N
AF011889.5	ENSG00000241489.7	protein_coding	chrX	149482543	149533935	-		non-IFN			5.31433	5.21985	4.93212	5.71827	lightgreen	blue	0.215913	0.104119	0.111794	1.11821	7.30173	0.210754	0.307901	0.709789	0.0636335	0.382556	-0.0501593	N	N	N	N
AF038458.4	ENSG00000267113.1	processed_pseudogene	chr19	35957121	35957382	-		non-IFN			3.65413	4.14757	3.11611	3.78054	grey	yellow	0.102484	0.0419393	0.0605449	1.44699	4.06475	-0.250225	0.145448	0.518869	0.0615341	0.136691	0.207383	N	N	N	N
AF111168.1	ENSG00000280308.1	protein_coding	chr14	77416398	77416772	+		non-IFN			9.9367	8.74406	10.1658	10.5764	lightcyan	blue	0.159952	0.111599	0.0483529	0.530538	30.2801	-0.0871857	0.425074	0.793807	0.0487213	-0.125642	0.283314	N	N	N	N
AF196972.4	ENSG00000226971.1	processed_pseudogene	chrX	48446893	48448879	-		non-IFN			2.14548	2.10635	2.11121	2.20334	yellow	blue	0.270826	0.137698	0.133128	0.458897	40.7917	-0.0519715	0.674822	0.908206	-0.0393095	0.298795	-0.249067	N	N	N	N
AF213884.2	ENSG00000260651.1	antisense	chr4	102500841	102501319	-		non-IFN			3.58201	4.33316	2.61078	3.90875	orange	magenta	0.134212	0.10396	0.0302517	1.61601	21.8029	-0.365416	0.0645276	0.35057	-0.10131	-0.103351	-0.030617	N	N	N	N
AF230666.2	ENSG00000223697.3	antisense	chr8	132838117	132844298	-		non-IFN			3.12107	3.27308	3.02462	3.09886	white	blue	0.225256	0.0951758	0.13008	0.160411	6.99335	-0.319119	0.123017	0.482456	0.00794502	0.297894	-0.216723	N	N	N	N
AFF1	ENSG00000172493.20	protein_coding	chr4	86935002	87141054	+	Mitochondria;Nucleoplasm	non-IFN	Triglycerides	Chemicals and Drugs Category	2.24668	2.00447	2.52102	2.1756	midnightblue	grey	0.141466	0.0490186	0.0924472	-1.32571	274.815	0.144185	0.293171	0.695982	-0.154647	-0.205801	-0.185935	N	N	N	N
AFF4	ENSG00000072364.12	protein_coding	chr5	132875379	132963634	-		non-IFN			5.5499	4.94422	5.90983	5.65984	turquoise	grey	0.385582	0.0248001	0.360782	-0.546423	352.847	0.0626938	0.519745	0.848123	0.0322935	-0.137351	0.229003	N	Y	N	N
AFG3L1P	ENSG00000223959.8	unitary_pseudogene	chr16	89972586	90002161	+		non-IFN			1.33	1.34407	1.38504	1.2715	greenyellow	grey	0.128736	0.0443579	0.0843785	-0.732109	58.2804	0.0724466	0.632757	0.894048	0.158314	0.0580927	0.300264	N	N	N	N
AFG3L2	ENSG00000141385.9	protein_coding	chr18	12328944	12377314	-		non-IFN			12.7788	13.0043	12.1174	13.2033	darkred	greenyellow	0.0932109	0.14801	-0.054799	1.27761	483.259	-0.0902859	0.380112	0.764601	-0.243069	-0.12992	-0.231944	N	N	N	N
AFMID	ENSG00000183077.15	protein_coding	chr17	78187317	78207701	+	Mitochondria	non-IFN			13.6651	14.6006	12.2461	14.2568	darkred	blue	0.109745	0.0369497	0.0727956	1.86215	239.167	-0.288368	0.00191818	0.0315735	-0.211338	-0.141404	-0.098589	Y	N	N	N
AFTPH	ENSG00000119844.15	protein_coding	chr2	64524305	64593005	+		non-IFN			8.26738	8.40452	8.66905	7.81618	darkorange	grey	0.115545	0.0382057	0.0773393	-1.56415	426.709	0.115911	0.198421	0.594238	0.0685961	-0.0153113	-0.0193719	N	N	N	N
AGA	ENSG00000038002.8	protein_coding	chr4	177430770	177442503	-		non-IFN			14.0968	15.0628	13.3093	14.1099	salmon	blue	0.112225	0.112355	-0.000130137	0.708835	441.321	-0.0786025	0.485277	0.828391	-0.0314378	0.359364	-0.352153	N	N	N	N
AGAP3	ENSG00000133612.18	protein_coding	chr7	151085831	151144436	+		non-IFN			2.59674	2.98226	2.34838	2.54376	grey	blue	0.0876619	0.230533	-0.142871	0.671625	110.879	-0.144965	0.340701	0.733035	0.161101	0.0974967	0.315658	N	N	N	N
AGAP4	ENSG00000188234.13	protein_coding	chr10	45825594	45853875	-		non-IFN			0.919444	1.03525	0.874566	0.877298	brown	green	0.0865556	0.0838633	0.00269225	0.0346684	34.5263	-0.0299791	0.785737	0.942894	0.0547596	0.0421059	0.132663	N	N	N	N
AGAP6	ENSG00000204149.10	protein_coding	chr10	49982190	50010499	+		non-IFN			1.58431	1.71639	1.66927	1.41611	grey	grey	0.0698178	0.0389676	0.0308502	-1.49522	62.1391	0.186731	0.179006	0.568569	-0.158143	-0.324689	-0.139408	N	N	N	N
AGBL5	ENSG00000084693.15	protein_coding	chr2	27042364	27070622	+	Cytosol;Microtubules	non-IFN			2.03957	2.13027	2.07509	1.9442	grey	grey	0.0898368	0.0258576	0.0639792	-0.425841	81.706	0.0887336	0.623252	0.8912	0.0866619	0.0236424	0.112253	N	N	N	N
AGER	ENSG00000204305.13	protein_coding	chr6	32180968	32184324	-	Nucleoli fibrillar center	non-IFN	Complement C4	Chemicals and Drugs Category	3.19441	3.0503	3.22947	3.2652	grey	grey	0.0722473	0.0233239	0.0489234	0.0724436	47.173	0.0222508	0.899387	0.976684	0.228059	0.303073	0.135949	N	N	N	N
AGFG1	ENSG00000173744.17	protein_coding	chr2	227472152	227561214	+		non-IFN			4.87052	4.36395	5.56869	4.61207	grey60	greenyellow	0.159323	0.0357269	0.123596	-1.35106	490.778	0.241174	0.116376	0.471715	-0.143719	-0.17653	-0.162758	N	N	N	N
AGGF1	ENSG00000164252.12	protein_coding	chr5	77029251	77065234	+		non-IFN			8.1639	8.10463	8.13066	8.23507	darkgreen	yellow	0.117748	0.0825043	0.0352435	0.168172	477.061	0.00286139	0.975208	0.99423	-0.0582798	-0.117987	0.0524079	N	N	N	N
AGK	ENSG00000006530.15	protein_coding	chr7	141551189	141655244	+	Vesicles	non-IFN			5.7071	5.70922	5.74004	5.67654	white	blue	0.162708	0.0681488	0.0945588	-0.0969798	188.197	-0.120406	0.362569	0.750508	0.101158	0.334596	-0.118826	N	N	N	N
AGO1	ENSG00000092847.11	protein_coding	chr1	35869808	35930528	+		non-IFN			3.6303	3.72445	3.30236	3.85319	salmon	blue	0.146309	0.0475359	0.0987734	1.5256	655.277	-0.184269	0.137232	0.507522	-0.110424	-0.112132	0.023696	N	N	N	N
AGO2	ENSG00000123908.11	protein_coding	chr8	140520156	140635619	-	Cell Junctions	non-IFN			1.78002	1.63174	1.54266	2.09411	black	red	0.127374	0.0719964	0.0553777	2.17879	261.21	-0.136935	0.320394	0.718707	-0.145871	0.166397	-0.292481	N	N	N	N
AGO3	ENSG00000126070.19	protein_coding	chr1	35930718	36072500	+	Nucleoplasm	non-IFN			8.11067	7.22772	8.31697	8.55189	turquoise	turquoise	0.093361	0.0935068	-0.000145785	0.344748	504.227	0.0247204	0.728501	0.926482	-0.103456	-0.270649	0.0629586	N	N	N	N
AGO4	ENSG00000134698.10	protein_coding	chr1	35808172	35857890	+		non-IFN			8.78097	8.32795	8.81045	9.07473	turquoise	blue	0.122036	0.0841048	0.0379316	0.511431	1054.52	-0.0431664	0.579787	0.873723	-0.0953158	0.308702	-0.349386	N	N	N	N
AGPAT1	ENSG00000204310.11	protein_coding	chr6	32168212	32178096	-	Rods & Rings	non-IFN			11.066	10.339	11.8947	10.848	red	turquoise	0.179296	0.10929	0.070006	-1.20961	189.921	0.0973638	0.307075	0.70904	-0.014081	0.156265	-0.229349	N	N	N	N
AGPAT2	ENSG00000169692.12	protein_coding	chr9	136673143	136687423	-	Centrosome	non-IFN			75.4571	76.9563	75.7838	74.1104	turquoise	turquoise	0.163732	0.374188	-0.210456	-0.487666	1610.89	0.0241994	0.675254	0.908206	-0.249963	-0.126768	-0.457661	N	N	N	N
AGPAT3	ENSG00000160216.18	protein_coding	chr21	43865186	43986536	+		non-IFN			9.05185	7.83684	10.6234	8.52287	turquoise	red	0.683197	0.156056	0.527141	-2.1462	669.56	0.253249	0.00925407	0.10326	-0.00222461	-0.0556159	-0.151862	N	Y	N	N
AGPAT4	ENSG00000026652.13	protein_coding	chr6	161129979	161274061	-	Golgi apparatus;Nucleoli;Vesicles	non-IFN			4.60383	4.33965	4.4379	4.93673	darkred	grey	0.131989	0.0267558	0.105233	0.839458	158.931	-0.0166974	0.918155	0.982318	-0.0867841	0.0416556	-0.104297	N	N	N	N
AGPAT4-IT1	ENSG00000279355.1	TEC	chr6	161160105	161161982	-		non-IFN			1.4184	1.21832	1.56193	1.433	greenyellow	grey	0.0743827	0.0185948	0.055788	-0.453016	42.5566	0.0856332	0.656427	0.902306	0.0341758	-0.0155364	0.119345	N	N	N	N
AGPAT5	ENSG00000155189.11	protein_coding	chr8	6708357	6759666	+		non-IFN			3.87038	4.17226	4.26543	3.30873	yellowgreen	blue	0.229552	0.0787164	0.150836	-1.65451	217.019	0.27241	0.117519	0.473505	-0.0657359	0.0468344	-0.300437	N	N	N	N
AGPS	ENSG00000018510.13	protein_coding	chr2	177392644	177559299	+		non-IFN			7.87473	7.02369	8.8172	7.64388	darkgreen	blue	0.19896	0.24637	-0.0474099	-1.57129	646.7	0.197628	0.0505829	0.307463	0.0403852	0.0918675	-0.149613	N	N	N	N
AGTPBP1	ENSG00000135049.15	protein_coding	chr9	85546539	85742029	-	Nucleoli;Vesicles	non-IFN			28.8612	28.6401	26.9694	30.6865	yellow	brown	0.289222	0.338515	-0.0492923	2.00002	2017.33	-0.178451	0.0303816	0.229319	-0.186549	0.272	-0.393837	N	N	N	N
AGTRAP	ENSG00000177674.15	protein_coding	chr1	11736084	11754802	+		non-IFN			508.237	501.404	505.028	515.892	grey	turquoise	0.210667	0.357503	-0.146836	0.637847	7393.8	-0.0463036	0.272221	0.676498	-0.148902	0.0396291	-0.319117	N	N	N	N
AHCTF1	ENSG00000153207.14	protein_coding	chr1	246839098	246931978	-		non-IFN			1.74912	1.58519	1.89504	1.73607	pink	green	0.103715	0.0829863	0.0207288	-0.847267	266.387	0.113955	0.394683	0.773465	0.0760278	-0.186662	0.264807	N	N	N	N
AHCY	ENSG00000101444.12	protein_coding	chr20	34280268	34311802	-		non-IFN			11.3539	11.666	10.9048	11.5298	purple	black	0.112559	0.101015	0.0115441	0.705955	330.253	-0.0758591	0.504397	0.84069	-0.214956	-0.0923179	-0.144078	N	N	N	N
AHCYL1	ENSG00000168710.17	protein_coding	chr1	109984686	110023741	+	Cytosol	non-IFN			11.4072	11.3976	10.204	12.4756	turquoise	blue	0.168965	0.0876728	0.0812925	2.74873	607.311	-0.225149	0.0248328	0.201592	-0.219063	-0.00743046	-0.181611	N	N	N	N
AHCYL2	ENSG00000158467.16	protein_coding	chr7	129225023	129430211	+	Cytosol;Nucleoplasm	non-IFN			3.46618	3.93179	3.1911	3.38024	green	turquoise	0.106983	0.0496679	0.0573146	0.531406	258.066	-0.151177	0.270454	0.6747	-0.159878	-0.0105828	-0.273282	N	N	N	N
AHI1	ENSG00000135541.20	protein_coding	chr6	135283532	135497776	-	Centrosome	non-IFN	Multiple Sclerosis	Immune System Diseases;Nervous System Diseases	1.66708	1.79077	1.39221	1.8223	white	grey	0.0814269	0.034041	0.0473859	1.15489	52.3388	-0.257355	0.176225	0.565499	-0.0578398	0.0423311	0.0603642	N	N	N	N
AHNAK	ENSG00000124942.13	protein_coding	chr11	62433542	62556235	-		non-IFN			94.3787	95.3062	83.5887	103.245	lightgreen	turquoise	0.148334	0.15693	-0.00859612	4.04084	8870.76	-0.337513	7.1362e-06	0.000306856	-0.140712	0.243854	-0.214301	Y	N	N	N
AHR	ENSG00000106546.12	protein_coding	chr7	17298622	17346152	+		non-IFN	Caffeine	Chemicals and Drugs Category	12.5911	10.552	11.5657	14.9352	grey60	greenyellow	0.195913	0.114501	0.0814116	2.48867	608.477	-0.239166	0.0571185	0.328409	-0.337529	-0.024543	-0.478589	N	N	N	N
AHSA1	ENSG00000100591.7	protein_coding	chr14	77457870	77469474	+		non-IFN			30.3663	30.4353	30.4814	30.2162	darkturquoise	yellow	0.147613	0.197154	-0.0495408	-0.149098	611.389	-0.000322226	0.996775	0.999155	-0.055004	0.0112583	-0.139581	N	N	N	N
AHSA2	ENSG00000173209.22	protein_coding	chr2	61177418	61191203	+	Cytokinetic bridge;Microtubules;Vesicles	non-IFN	Celiac Disease	Digestive System Diseases;Nutritional and Metabolic Diseases	19.869	20.3425	20.9574	18.5745	brown	grey	0.142041	0.0401064	0.101935	-1.5782	594.166	0.0578245	0.519794	0.848123	0.0400918	-0.144331	0.089249	N	N	N	N
AIDA	ENSG00000186063.12	protein_coding	chr1	222668013	222713210	-	Cytokinetic bridge;Cytosol;Microtubules	non-IFN			7.1667	6.24922	7.86173	7.20107	greenyellow	turquoise	0.110272	0.0460266	0.0642449	-1.06523	352.164	0.104156	0.304531	0.706822	-0.021366	0.036702	-0.130933	N	N	N	N
AIF1	ENSG00000204472.12	protein_coding	chr6	31615184	31617021	+	Cytosol	non-IFN	Blood Pressure	Diagnostic Techniques and Procedures;Physical Examination	1877.52	1882.32	1947.12	1812.73	lightyellow	black	0.279561	0.116365	0.163197	-1.88075	16093.7	0.0584408	0.357963	0.746233	0.0373049	0.131722	-0.235922	N	N	N	N
AIFM1	ENSG00000156709.13	protein_coding	chrX	130129362	130165887	-		non-IFN			13.5566	14.1001	13.457	13.2608	grey	turquoise	0.149669	0.0881033	0.0615658	-0.195291	430.106	0.00947919	0.916402	0.982318	-0.0503103	-0.191616	0.0364952	N	N	N	N
AIFM3	ENSG00000183773.15	protein_coding	chr22	20965108	20981360	+		non-IFN			1.62836	1.81885	1.72605	1.40771	yellowgreen	grey	0.190456	0.026738	0.163718	-1.11154	56.2977	0.189753	0.328583	0.723841	0.0880309	0.148384	-0.0127993	N	N	N	N
AIG1	ENSG00000146416.17	protein_coding	chr6	143060496	143340304	+	Golgi apparatus	non-IFN			3.82911	3.45615	4.25803	3.71392	yellowgreen	red	0.215948	0.0164775	0.199471	-0.978436	70.9648	0.0906951	0.573065	0.872355	0.0307778	0.0923179	-0.0833683	N	N	N	N
AIM1	ENSG00000112297.14	protein_coding	chr6	106360808	106571978	+	Cytosol;Microtubules;Nucleus	non-IFN			7.09135	6.22308	7.91781	6.97501	grey	turquoise	0.109801	0.145766	-0.0359646	-1.92077	931.684	0.171454	0.0590367	0.33339	-0.0481102	-0.129245	-0.267574	N	N	N	N
AIM2	ENSG00000163568.14	protein_coding	chr1	159062484	159147096	-		IFN	Leukocyte Count	Diagnostic Techniques and Procedures	6.83141	5.18064	9.77891	5.39593	turquoise	pink	0.465742	0.0954903	0.370252	-2.38856	167.637	0.614915	0.00113446	0.0215867	0.125629	0.16347	-0.0553482	Y	Y	Y	N
AIMP1	ENSG00000164022.16	protein_coding	chr4	106315544	106349226	+		non-IFN			22.6521	23.3899	22.7682	22.0289	darkgreen	red	0.304264	0.0405871	0.263677	-0.676347	833.046	0.0215999	0.742302	0.930558	0.0301422	0.100649	-0.0416841	N	Y	N	N
AIMP2	ENSG00000106305.9	protein_coding	chr7	6009245	6023834	+	Cytosol	non-IFN			12.1765	11.9859	12.7579	11.7981	blue	red	0.299272	0.0995953	0.199677	-0.986522	188.297	0.0934966	0.366027	0.753033	-0.0165012	0.0659735	-0.20894	N	N	N	N
AIP	ENSG00000110711.9	protein_coding	chr11	67483041	67491103	+		non-IFN			36.2088	34.1546	37.0819	36.8884	blue	turquoise	0.234988	0.118893	0.116094	-0.0861739	634.548	-0.00196914	0.98052	0.995224	-0.148095	0.0405298	-0.394356	N	N	N	N
AJ003147.11	ENSG00000279330.1	TEC	chr16	3273609	3275807	+		non-IFN			2.3554	2.14493	2.19701	2.64372	plum1	green	0.0685819	0.0450022	0.0235798	1.55057	83.8686	-0.229038	0.119106	0.476363	-0.108517	-0.092543	0.0368412	N	N	N	N
AK2	ENSG00000004455.16	protein_coding	chr1	33007940	33080996	-		non-IFN			112.214	103.691	120.207	111.178	brown	turquoise	0.134586	0.0988137	0.0357725	-1.39173	2688.55	0.0564682	0.30444	0.706822	0.00171124	0.188689	-0.309777	N	N	N	N
AK3	ENSG00000147853.16	protein_coding	chr9	4709559	4742043	-		non-IFN			9.89864	8.94651	9.64173	10.7974	red	blue	0.235484	0.0704635	0.16502	1.14534	287.838	-0.164273	0.19655	0.591889	-0.151493	-0.0351258	-0.207556	N	N	N	N
AK3P5	ENSG00000228816.1	processed_pseudogene	chr10	32944481	32944999	+		non-IFN			0.725578	0.385519	1.03838	0.689616	purple	magenta	0.113694	0.0209807	0.0927133	-1.11062	5.26295	0.135105	0.43451	0.797299	0.067442	0.137635	-0.14918	N	N	N	N
AK4	ENSG00000162433.14	protein_coding	chr1	65147549	65232145	+		non-IFN			2.56997	2.31465	2.59058	2.732	darkmagenta	blue	0.115471	0.0362564	0.0792143	0.420711	122.655	-0.014133	0.92316	0.983007	-0.256563	-0.069351	-0.422203	N	N	N	N
AK4P1	ENSG00000263535.1	processed_pseudogene	chr17	31345521	31346187	+		non-IFN			0.754182	0.6955	0.72063	0.825209	turquoise	turquoise	0.107914	0.0447987	0.0631152	0.874604	6.04415	-0.138112	0.438661	0.799299	-0.125875	-0.0292715	-0.231252	N	N	N	N
AK6	ENSG00000085231.13	protein_coding	chr5	69350984	69370013	-		non-IFN			50.5624	48.3948	51.7943	51.0054	blue	yellow	0.205053	0.0868477	0.118206	-0.181258	315.445	0.0159111	0.88185	0.971909	-0.187747	-0.457761	0.0361493	N	N	N	N
AK9	ENSG00000155085.15	protein_coding	chr6	109492856	109691217	-	Nuclear membrane;Nucleoplasm	non-IFN	Body Height	Body Weights and Measures;Diagnostic Techniques and Procedures;Physical Examination	2.32709	2.21426	2.31349	2.41873	red	grey	0.179508	0.023874	0.155634	0.273832	100.772	-0.0801544	0.654599	0.901376	0.0300689	0.0513377	0.0714338	N	N	N	N
AKAP1	ENSG00000121057.12	protein_coding	chr17	57085092	57121349	+		non-IFN			2.47136	2.72461	2.30553	2.43891	turquoise	turquoise	0.162018	0.0657388	0.0962789	0.399178	136.333	0.00368418	0.982537	0.995317	0.201804	0.239351	0.288676	N	N	N	N
AKAP10	ENSG00000108599.14	protein_coding	chr17	19904302	19978343	-	Plasma membrane	non-IFN	Platelet Count	Diagnostic Techniques and Procedures	14.432	14.376	15.2194	13.7769	paleturquoise	blue	0.121372	0.193251	-0.0718787	-1.47271	693.482	0.140927	0.111299	0.463394	-0.102332	-0.153563	-0.173482	N	N	N	N
AKAP11	ENSG00000023516.8	protein_coding	chr13	42272153	42323267	+	Cytosol;Nucleoli;Plasma membrane	non-IFN			1.03343	1.03564	1.04364	1.02287	grey	grey	0.114296	0.0154211	0.0988747	-0.164493	169.481	-0.00924847	0.94926	0.989	0.143915	0.107404	0.230214	N	N	N	N
AKAP13	ENSG00000170776.20	protein_coding	chr15	85380571	85749358	+		non-IFN	Corneal Pachymetry	Diagnostic Techniques and Procedures	20.0423	18.7005	20.7021	20.4072	grey	blue	0.13261	0.121979	0.0106309	-0.404536	3391.68	0.0332553	0.488867	0.831124	-0.156016	-0.092543	-0.267574	N	N	N	N
AKAP17A	ENSG00000197976.11	protein_coding	chrX	1591593	1602514	+	Cytosol	non-IFN			10.4856	10.5093	9.87495	11.0076	yellow	turquoise	0.211928	0.210737	0.00119126	1.50443	1001.77	-0.150938	0.114914	0.469539	-0.111597	0.0675496	-0.148229	N	N	N	N
AKAP7	ENSG00000118507.15	protein_coding	chr6	131135666	131283535	+		non-IFN			3.82246	3.07497	4.89187	3.4065	turquoise	red	0.156795	0.0544215	0.102373	-2.35165	134.69	0.406345	0.0189117	0.167946	0.187551	0.157841	0.0928812	N	N	N	N
AKAP8	ENSG00000105127.8	protein_coding	chr19	15353385	15379798	-		non-IFN			6.59413	6.38083	6.55508	6.77916	purple	midnightblue	0.245715	0.131576	0.114139	0.432264	392.926	-0.054045	0.60029	0.881477	-0.120715	0.029947	-0.222604	N	N	N	N
AKAP8L	ENSG00000011243.17	protein_coding	chr19	15380048	15419141	-		non-IFN			22.4403	22.009	22.8224	22.4076	brown	blue	0.182322	0.193242	-0.0109204	-0.279339	690.533	0.00718233	0.929699	0.984607	-0.153131	-0.0716026	-0.222777	N	N	N	N
AKAP9	ENSG00000127914.16	protein_coding	chr7	91940867	92110673	+	Vesicles	non-IFN			47.5935	46.7879	50.3263	45.751	turquoise	green	0.214694	0.0871806	0.127513	-1.72669	1674.74	0.132785	0.10499	0.450687	0.0139832	-0.0207152	-0.125571	N	N	N	N
AKIP1	ENSG00000166452.11	protein_coding	chr11	8911139	8920084	+		non-IFN	Tonsillectomy	Other	17.6235	17.3788	18.0982	17.3773	red	darkgreen	0.185287	0.0509768	0.134311	-0.554007	277.505	0.0335595	0.710851	0.920664	-0.132547	-0.103576	-0.210323	N	N	N	N
AKIRIN1	ENSG00000174574.15	protein_coding	chr1	38991223	39006059	+	Nuclear membrane	non-IFN			44.0937	42.1154	45.3481	44.3834	skyblue	brown	0.272398	0.242177	0.0302207	-0.349166	1425.23	0.0271176	0.739183	0.9299	-0.037965	0.217735	-0.394356	N	N	N	N
AKIRIN2	ENSG00000135334.8	protein_coding	chr6	87675072	87702209	-		non-IFN			58.0002	51.4875	60.1558	60.6954	grey	greenyellow	0.13601	0.111899	0.0241107	0.133523	1515.48	-0.0298642	0.738499	0.929668	-0.11057	0.0927682	-0.243532	N	N	N	N
AKIRIN2P1	ENSG00000251482.1	processed_pseudogene	chr4	149789952	149790303	+		non-IFN			2.68041	2.38454	2.76888	2.8112	grey	grey	0.102093	0.0195204	0.0825726	0.113614	7.06858	-0.0402275	0.80508	0.950511	-0.18628	-0.0364768	-0.280719	N	N	N	N
AKNA	ENSG00000106948.16	protein_coding	chr9	114334156	114394405	-		non-IFN			6.62896	6.25586	6.83121	6.71386	midnightblue	blue	0.100184	0.0883717	0.0118126	-0.194376	518.755	-0.105188	0.256018	0.660554	0.250354	0.159642	0.343505	N	N	N	N
AKR1A1	ENSG00000117448.13	protein_coding	chr1	45550543	45570049	+	Nucleoplasm	non-IFN			156.845	151.617	161.595	156.345	blue	turquoise	0.233466	0.246554	-0.0130881	-0.753938	2673.59	0.0331867	0.574405	0.872867	-0.0815526	0.219086	-0.388475	N	N	N	N
AKR1B1	ENSG00000085662.13	protein_coding	chr7	134442350	134459284	-		non-IFN			48.2721	50.0388	40.9418	53.4931	darkgrey	blue	0.100633	0.053994	0.046639	3.63229	967.497	-0.374156	0.000186959	0.00520563	-0.230626	-0.138026	-0.0434138	Y	N	N	N
AKR1C3	ENSG00000196139.13	protein_coding	chr10	5035354	5107686	+	Endoplasmic reticulum;Nucleoli fibrillar center;Nucleus	non-IFN			1.01729	0.884934	1.1104	1.02856	pink	purple	0.109283	0.0814413	0.0278419	-0.220197	20.411	0.0132012	0.945282	0.987959	0.0828765	-0.0177783	0.135026	N	N	N	N
AKR7A2	ENSG00000053371.12	protein_coding	chr1	19303965	19312146	-		non-IFN			39.7001	40.2359	36.5813	42.0739	purple	blue	0.117436	0.114287	0.00314977	2.32644	770.594	-0.204089	0.0164099	0.152713	-0.234635	0.0745298	-0.435694	N	N	N	N
AKR7L	ENSG00000211454.13	polymorphic_pseudogene	chr1	19265982	19274194	-		non-IFN			1.72583	1.81642	1.53029	1.83441	grey	brown	0.089101	0.174184	-0.0850829	2.84397	30.0455	-0.231752	0.00894357	0.100495	-0.335916	-0.0616953	-0.448321	N	N	N	N
AKT1	ENSG00000142208.15	protein_coding	chr14	104769349	104795751	-		IFN			6.11272	6.22189	6.26294	5.90311	grey	darkred	0.166763	0.0257209	0.141042	-0.739557	150.867	0.0840928	0.483951	0.827821	0.0331491	-0.0506622	0.0833683	N	N	N	N
AKT1S1	ENSG00000204673.10	protein_coding	chr19	49869033	49878459	-		non-IFN			5.0384	4.49031	4.95715	5.49698	grey	turquoise	0.0839792	0.0470958	0.0368834	1.37021	166.369	-0.181489	0.0420739	0.276015	-0.0816015	0.0776821	-0.191816	N	N	N	N
AKT2	ENSG00000105221.16	protein_coding	chr19	40230317	40285536	-	Vesicles	non-IFN			10.251	10.4094	10.7121	9.73239	turquoise	blue	0.410302	0.134924	0.275378	-1.10753	395.776	0.151461	0.135969	0.505268	-0.0219527	0.0308477	-0.194411	N	Y	N	N
AKT3	ENSG00000117020.16	protein_coding	chr1	243488233	243851079	-		non-IFN			1.04581	1.14095	0.921483	1.08834	grey	grey	0.115335	0.0283605	0.0869742	0.951098	52.0966	-0.175949	0.390553	0.770825	0.0355693	0.222238	-0.014183	N	N	N	N
AKTIP	ENSG00000166971.16	protein_coding	chr16	53491040	53504411	-		non-IFN			7.26224	7.84304	6.73718	7.31554	yellow	grey	0.0943666	0.0435624	0.0508042	0.869693	135.487	-0.149004	0.424336	0.793537	-0.130372	-0.112358	-0.098935	N	N	N	N
AL023875.1	ENSG00000279849.1	protein_coding	chrX	42285229	42285603	+		non-IFN			11.2053	10.4754	11.8808	11.1244	lightcyan	brown	0.104152	0.0863364	0.0178156	-1.0412	33.5091	0.0559424	0.581348	0.874622	0.217229	0.174503	0.20721	N	N	N	N
AL049758.2	ENSG00000226989.1	processed_pseudogene	chr22	42853403	42853799	-		non-IFN			0.806776	0.78344	0.609138	0.997634	greenyellow	grey	0.115586	0.0270597	0.088526	1.3669	3.28553	-0.193171	0.29972	0.702367	-0.142459	0.0836615	-0.217563	N	N	N	N
AL132640.1	ENSG00000281228.1	pseudogene	chr14	67616903	67617084	+		non-IFN			11.9015	11.3216	12.9188	11.4131	darkgreen	green	0.0992368	0.061006	0.0382307	-0.87865	3.86346	0.13336	0.433107	0.796809	0.0522171	-0.0328742	0.105162	N	N	N	N
AL133243.1	ENSG00000276334.1	sense_intronic	chr2	32521927	32523547	+		non-IFN			1.98489	1.75953	2.16041	1.98909	grey	grey	0.115508	0.0318718	0.0836364	-0.453194	51.1328	0.0791279	0.680426	0.909936	0.170661	0.297669	0.101011	N	N	N	N
AL133243.2	ENSG00000276517.1	sense_intronic	chr2	32526504	32529507	+		non-IFN			1.91392	1.99072	1.80146	1.95892	grey	grey	0.0922089	0.0160677	0.0761412	0.63106	89.559	-0.12263	0.440699	0.800521	-0.214736	-0.272901	-0.203578	N	N	N	N
AL133245.2	ENSG00000272754.1	lincRNA	chr2	32321638	32323002	+		non-IFN			1.31359	1.13648	1.36121	1.3966	lightcyan	green	0.260095	0.0919948	0.1681	0.186323	27.0631	-0.0557839	0.703593	0.918649	0.17347	0.118437	0.293519	N	N	N	N
AL133335.1	ENSG00000280041.1	protein_coding	chr20	54249953	54250327	+		non-IFN			4.66948	3.99571	4.77503	5.05196	magenta	lightcyan	0.132034	0.0567463	0.0752879	0.581058	14.3733	-0.104745	0.425075	0.793807	0.32247	0.0970463	0.595685	N	N	N	N
AL135745.1	ENSG00000279654.1	protein_coding	chr14	64894339	64894713	+		non-IFN			4.98377	4.33311	5.21619	5.23798	black	lightcyan	0.192649	0.0671679	0.125481	0.0330342	15.2782	-0.0426218	0.772749	0.940285	0.310858	0.0065298	0.533246	N	N	N	N
AL136097.1	ENSG00000279007.1	protein_coding	chr9	92227001	92227375	+		non-IFN			11.1751	10.9475	11.4857	11.0616	blue	blue	0.246426	0.0740354	0.172391	-0.632799	32.8366	0.0246387	0.792383	0.945862	0.102039	-0.0740794	0.229003	N	N	N	N
AL137860.1	ENSG00000280403.1	protein_coding	chr1	27064991	27065365	-		non-IFN			4.71227	4.15778	4.61089	5.19313	turquoise	lightcyan	0.171683	0.056141	0.115542	0.913175	14.3549	-0.179827	0.233686	0.638066	0.114506	0.0583179	0.223814	N	N	N	N
AL162151.3	ENSG00000234648.1	processed_pseudogene	chr14	98973314	98973471	+		non-IFN			393.485	417.663	341.67	422.137	violet	cyan	0.129965	0.054649	0.0753158	4.36643	82.675	-0.305005	1.68992e-05	0.000661225	-0.0537573	0.180132	0.246991	Y	N	N	N
AL354828.2	ENSG00000280175.1	protein_coding	chr13	22664217	22675253	-		non-IFN			3.99695	3.80305	4.14956	3.99917	yellowgreen	green	0.131813	0.0476426	0.0841704	-0.628589	4.74024	0.034185	0.841913	0.959567	0.275191	0.220887	0.313409	N	N	N	N
AL356585.1	ENSG00000279081.1	protein_coding	chr13	18206570	18207469	-		non-IFN			2.43519	2.60369	2.05167	2.65465	lightcyan	grey	0.0967692	0.0274257	0.0693434	3.13057	27.7833	-0.363485	0.00075665	0.0159555	-0.204199	-0.0990728	-0.109313	Y	N	N	N
AL358852.1	ENSG00000278899.1	protein_coding	chr6	149717621	149718888	+		non-IFN			1.55089	1.39484	1.47805	1.72531	turquoise	turquoise	0.294801	0.182919	0.111883	1.52337	13.2441	-0.152544	0.414565	0.78843	-0.214662	-0.0684503	-0.289713	N	N	N	N
AL365181.1	ENSG00000280316.1	protein_coding	chr1	156597173	156599410	+		non-IFN			1.11963	1.15718	1.00874	1.19096	blue	turquoise	0.137943	0.042476	0.095467	1.03649	8.22964	-0.111821	0.542964	0.860311	0.01523	-0.234397	0.191643	N	N	N	N
AL365202.1	ENSG00000279745.1	protein_coding	chr9	3452305	3453987	-		non-IFN			5.40315	5.79164	5.26598	5.24996	tan	grey	0.126345	0.0247597	0.101585	-0.0269663	10.2783	-0.0492085	0.750362	0.932808	-0.0526816	0.117762	-0.180228	N	N	N	N
AL590235.1	ENSG00000280230.1	protein_coding	chr4	3538044	3538418	+		non-IFN			6.53541	6.70364	6.61792	6.34386	grey	blue	0.0869067	0.0869253	-1.86e-05	-0.600989	18.9027	0.0224337	0.843765	0.960331	0.154989	-0.0337748	0.215858	N	N	N	N
AL590762.11	ENSG00000213018.2	processed_pseudogene	chrX	71420083	71420514	-		non-IFN			5.80156	6.03051	5.68331	5.74429	salmon	red	0.145394	0.0235845	0.12181	0.119955	22.1362	-0.0293781	0.807876	0.951431	0.0777635	0.256464	-0.0491216	N	N	N	N
AL590762.6	ENSG00000224208.1	processed_pseudogene	chrX	71314912	71315879	-		non-IFN			1.32967	1.43234	1.49181	1.11412	grey	grey	0.126873	0.0244745	0.102398	-2.56744	9.51809	0.306128	0.0414717	0.2737	0.177626	0.13645	-0.0162585	N	N	N	N
AL591806.1	ENSG00000278883.1	protein_coding	chr1	161065865	161066153	+		non-IFN			26.3746	26.205	30.1343	23.177	royalblue	grey	0.138914	0.0153294	0.123585	-2.07871	5.30579	0.224663	0.159462	0.539254	0.067998	0.0806092	-0.0850979	N	N	N	N
AL645728.1	ENSG00000279244.1	protein_coding	chr1	1579756	1580046	+		non-IFN			4.8936	4.25123	4.95563	5.29229	brown	tan	0.15938	0.0356936	0.123686	0.692202	6.99582	-0.0937514	0.499518	0.83782	0.0679116	-0.0828609	0.33624	N	N	N	N
AL691477.1	ENSG00000280249.1	pseudogene	chrX	134799782	134799945	-		non-IFN			52.6606	53.2789	51.4683	53.2761	royalblue	green	0.181212	0.0491216	0.13209	0.344606	12.7432	-0.0625725	0.62127	0.890365	0.201486	0.241828	0.217069	N	N	N	N
ALAD	ENSG00000148218.15	protein_coding	chr9	113386317	113401333	-		non-IFN			9.73972	10.1522	9.36478	9.77937	red	turquoise	0.257136	0.0792161	0.17792	0.626018	479.656	-0.0754602	0.382646	0.765843	-0.0280887	0.173828	-0.11675	N	N	N	N
ALAS1	ENSG00000023330.14	protein_coding	chr3	52198086	52214327	+		non-IFN			17.0755	17.3715	18.2591	15.8221	grey60	turquoise	0.0827154	0.353147	-0.270431	-1.80282	578.578	0.191677	0.070684	0.371033	0.0986405	0.19094	-0.135603	N	Y	N	N
ALCAM	ENSG00000170017.12	protein_coding	chr3	105366909	105576900	+		non-IFN			7.21903	7.14232	7.40488	7.10919	grey	blue	0.114055	0.0458398	0.0682148	-0.329084	367.725	0.0232934	0.869126	0.967257	-0.188529	-0.0506622	-0.366509	N	N	N	N
ALDH16A1	ENSG00000161618.9	protein_coding	chr19	49453169	49471048	+		non-IFN			9.67047	8.9548	9.72526	10.1273	yellow	turquoise	0.156574	0.110888	0.0456869	0.526115	413.684	-0.0601488	0.529719	0.853153	-0.0136654	-0.024543	0.111042	N	N	N	N
ALDH18A1	ENSG00000059573.8	protein_coding	chr10	95605929	95656706	-		non-IFN			1.01503	0.849493	1.06995	1.08343	turquoise	blue	0.177755	0.0439975	0.133757	0.0606283	57.4565	0.01463	0.943615	0.987899	-0.242318	-0.0871693	-0.388475	N	N	N	N
ALDH1A1	ENSG00000165092.12	protein_coding	chr9	72900662	73080442	-		non-IFN			42.5728	47.1924	35.2749	45.7511	grey	blue	0.167281	0.0763939	0.0908871	2.90867	1247.45	-0.359425	0.00176534	0.0295476	-0.264484	-0.0896159	-0.245089	Y	N	N	N
ALDH1B1	ENSG00000137124.7	protein_coding	chr9	38392664	38398661	+		non-IFN			1.41318	1.50252	1.2857	1.4626	brown	pink	0.15453	0.043373	0.111157	0.788312	66.0907	-0.163342	0.356541	0.745504	0.0470834	0.140954	0.112599	N	N	N	N
ALDH2	ENSG00000111275.12	protein_coding	chr12	111766887	111817529	+		non-IFN			226.248	232.538	213.435	233.114	darkturquoise	blue	0.18262	0.178792	0.00382804	1.3566	4948.2	-0.134662	0.0887099	0.414344	-0.168435	0.0623708	-0.23817	N	N	N	N
ALDH3A2	ENSG00000072210.18	protein_coding	chr17	19648136	19677598	+		non-IFN			19.2293	18.7517	19.6568	19.1891	grey	turquoise	0.165788	0.236582	-0.070794	-0.346441	748.178	0.0194595	0.808333	0.951611	-0.231481	-0.0211656	-0.564725	N	N	N	N
ALDH3B1	ENSG00000006534.15	protein_coding	chr11	68008578	68029282	+		non-IFN			34.895	34.4652	35.1472	34.9759	brown	turquoise	0.244192	0.25978	-0.0155877	-0.0983586	1365.88	0.00267091	0.966118	0.99316	-0.0199237	0.035351	-0.0683205	N	N	N	N
ALDH4A1	ENSG00000159423.16	protein_coding	chr1	18871430	18902781	-		non-IFN			2.00453	1.86872	2.08286	2.03128	grey	turquoise	0.0935947	0.0742258	0.0193689	-0.207714	56.4198	0.146081	0.384632	0.766609	-0.342541	-0.455735	-0.266882	N	N	N	N
ALDH6A1	ENSG00000119711.12	protein_coding	chr14	74056850	74084493	-		non-IFN			7.97859	8.45074	7.52816	8.04275	tan	turquoise	0.119442	0.0959828	0.0234597	0.670708	357.746	-0.106835	0.251808	0.65541	-0.316603	-0.284384	-0.279509	N	N	N	N
ALDH9A1	ENSG00000143149.12	protein_coding	chr1	165662216	165698863	-	Cytosol	non-IFN			18.3336	19.2821	18.9202	17.1464	grey	turquoise	0.108002	0.0738778	0.0341242	-1.43124	716.981	0.134199	0.182369	0.57206	0.0998628	0.155364	-0.0857898	N	N	N	N
ALDOA	ENSG00000149925.17	protein_coding	chr16	30053090	30070457	+		non-IFN			972.804	939.031	1030.87	945.408	yellow	turquoise	0.400467	0.720511	-0.320044	-2.63777	20659.5	0.117348	0.00876625	0.0989487	-0.0339069	0.211656	-0.48274	N	Y	N	N
ALDOC	ENSG00000109107.13	protein_coding	chr17	28573115	28577264	-	Cytosol;Nucleoli fibrillar center;Nucleus;Vesicles	non-IFN			2.29414	2.42633	2.1253	2.34981	tan	grey	0.0933976	0.0174979	0.0758997	0.543693	47.4422	-0.0624993	0.760301	0.935738	-0.0526635	0.0366302	-0.115539	N	N	N	N
ALG1	ENSG00000033011.11	protein_coding	chr16	5033960	5087379	+	Endoplasmic reticulum;Nucleoli fibrillar center	non-IFN			10.158	9.41841	10.1597	10.6786	cyan	blue	0.174886	0.150639	0.0242467	0.641407	232.296	-0.0499855	0.663117	0.90511	-0.139319	0.184861	-0.317733	N	N	N	N
ALG11	ENSG00000253710.2	protein_coding	chr13	52012398	52029664	+		non-IFN			7.88447	7.71651	7.95686	7.93915	turquoise	blue	0.441948	0.120934	0.321015	-0.022414	166.075	0.0269978	0.830766	0.956435	-0.0389917	0.0614702	-0.126782	N	Y	N	N
ALG12	ENSG00000182858.13	protein_coding	chr22	49900229	49918458	-	Endoplasmic reticulum	non-IFN			2.14676	2.04681	2.16635	2.20002	grey	turquoise	0.0917678	0.0885722	0.00319563	0.169328	168.388	-0.0212899	0.851195	0.962829	-0.13751	-0.281457	0.0416841	N	N	N	N
ALG13	ENSG00000101901.11	protein_coding	chrX	111665811	111760649	+		non-IFN			28.2797	26.9269	26.7385	30.5946	grey	blue	0.0773035	0.0736876	0.00361586	2.06325	444.62	-0.117624	0.113761	0.467302	-0.186671	-0.0315232	-0.175212	N	N	N	N
ALG13-AS1	ENSG00000229487.1	antisense	chrX	111706649	111711101	-		non-IFN			3.6965	3.76385	2.88756	4.36273	darkgreen	grey	0.103164	0.0251767	0.0779873	1.47743	3.72406	-0.292719	0.155517	0.533984	0.122866	-0.00300153	0.305941	N	N	N	N
ALG14	ENSG00000172339.9	protein_coding	chr1	94974407	95072945	-	Nucleoli;Nucleus	non-IFN			0.979542	0.986184	0.975701	0.978244	grey	pink	0.127316	0.0308898	0.0964262	0.0352325	152.111	-0.0282328	0.782905	0.942044	0.160123	0.303748	-0.0304415	N	N	N	N
ALG1L15P	ENSG00000242017.1	processed_pseudogene	chr3	156044155	156044948	-		non-IFN			1.03151	0.947872	1.04331	1.08013	grey	blue	0.110594	0.04972	0.060874	0.3269	10.5213	-0.0352601	0.798923	0.948043	0.000220016	0.0155364	0.0216204	N	N	N	N
ALG2	ENSG00000119523.9	protein_coding	chr9	99216426	99221956	-		non-IFN			15.3316	16.1229	14.8946	15.1588	grey	turquoise	0.101145	0.175427	-0.0742816	0.232655	397.418	-0.0327874	0.772384	0.940285	-0.134381	-0.00382781	-0.262904	N	N	N	N
ALG3	ENSG00000214160.9	protein_coding	chr3	184242301	184249548	-		non-IFN			32.2902	32.8972	32.7544	31.4521	yellow	blue	0.139141	0.0898899	0.0492506	-0.640233	720.393	0.0405988	0.636808	0.895433	-0.00767612	0.0346755	-0.0446245	N	N	N	N
ALG5	ENSG00000120697.8	protein_coding	chr13	36949775	37000261	-	Cytosol	non-IFN			39.1034	40.3194	38.0346	39.1882	grey60	blue	0.0958065	0.0797385	0.016068	0.583636	622.192	-0.0588829	0.390141	0.770576	-0.272991	-0.185762	-0.380865	N	N	N	N
ALG6	ENSG00000088035.15	protein_coding	chr1	63367590	63438562	+		non-IFN			14.4483	13.3031	15.0747	14.704	red	blue	0.234908	0.121753	0.113155	-0.344432	463.534	0.028044	0.769592	0.939447	-0.178017	-0.0398543	-0.386919	N	N	N	N
ALG8	ENSG00000159063.12	protein_coding	chr11	78100936	78139660	-	Nucleoplasm	non-IFN			18.8572	19.8119	17.9185	19.0115	turquoise	grey	0.161319	0.0293446	0.131974	0.673913	460.838	-0.0995106	0.438929	0.799534	-0.230528	-0.0180132	-0.449012	N	N	N	N
ALG9	ENSG00000086848.14	protein_coding	chr11	111782195	111871581	-	Endoplasmic reticulum	non-IFN			2.59368	2.34096	2.48288	2.86982	red	grey	0.138453	0.0250104	0.113443	0.855719	5.68148	-0.254034	0.196568	0.591889	-0.138135	-0.14253	-0.0529267	N	N	N	N
ALKBH1	ENSG00000100601.9	protein_coding	chr14	77672404	77708020	-		non-IFN			2.68564	2.72689	2.75188	2.59808	steelblue	yellow	0.138181	0.0530621	0.085119	-0.454379	108.66	0.07034	0.660316	0.903966	-0.118906	0.0589934	-0.343678	N	N	N	N
ALKBH2	ENSG00000189046.10	protein_coding	chr12	109088188	109093631	-		non-IFN			4.20832	4.77503	3.4355	4.49021	tan	grey	0.135765	0.0287319	0.107033	1.63055	49.859	-0.306574	0.112751	0.465615	-0.0421137	-0.147648	0.275357	N	N	N	N
ALKBH3	ENSG00000166199.12	protein_coding	chr11	43880811	43920266	+		non-IFN			9.29893	9.49949	9.32485	9.13448	turquoise	lightyellow	0.308359	0.0811515	0.227207	-0.164335	203.991	0.0105469	0.941497	0.987421	-0.244096	-0.087139	-0.409923	N	N	N	N
ALKBH4	ENSG00000160993.3	protein_coding	chr7	102456238	102464876	-		non-IFN			4.35978	4.28282	4.53625	4.25839	black	grey	0.188377	0.0319538	0.156424	-0.626341	124.305	0.0116458	0.929812	0.984677	0.135065	0.167298	0.0541375	N	N	N	N
ALKBH5	ENSG00000091542.8	protein_coding	chr17	18183078	18209954	+	Cytosol;Golgi apparatus;Nucleoplasm	non-IFN			42.1776	43.0626	39.9079	43.5557	tan	blue	0.173839	0.568998	-0.395159	1.7974	1476.44	-0.106569	0.179927	0.56925	-0.262919	0.133298	-0.381384	N	Y	N	N
ALKBH6	ENSG00000239382.10	protein_coding	chr19	36009120	36014239	-	Focal adhesion sites	non-IFN			9.88788	10.2269	10.2816	9.30121	turquoise	black	0.136672	0.0283778	0.108294	-1.19532	19.6347	0.0123451	0.924763	0.983223	-0.063658	-0.332119	0.0932272	N	N	N	N
ALKBH7	ENSG00000125652.7	protein_coding	chr19	6372433	6375251	+		non-IFN			55.9698	57.278	55.101	55.8131	lightyellow	brown	0.149596	0.0406003	0.108996	0.294061	418.132	-0.0330646	0.645085	0.898331	0.12756	-0.0745298	0.41269	N	N	N	N
ALKBH8	ENSG00000137760.14	protein_coding	chr11	107502726	107565746	-		non-IFN			0.891035	0.685569	1.17837	0.78254	brown	grey	0.162992	0.0184012	0.144591	-1.80863	44.662	0.343574	0.0961995	0.431018	0.108551	0.0728908	0.0710608	N	N	N	N
ALOX12-AS1	ENSG00000215067.9	antisense	chr17	6876635	7012349	-		non-IFN			6.95865	7.48791	5.98701	7.44238	orange	grey	0.0861406	0.0211934	0.0649472	2.58177	100.051	-0.330111	0.00764404	0.0903721	-0.192807	-0.0927682	-0.0179882	N	N	N	N
ALOX15B	ENSG00000179593.15	protein_coding	chr17	8039017	8049134	+		non-IFN			3.26494	2.08531	3.60823	3.79473	grey60	greenyellow	0.239195	0.0927305	0.146464	0.134107	148.327	-0.0520438	0.801184	0.948797	-0.190861	-0.0935667	-0.182822	N	N	N	N
ALOX5	ENSG00000012779.10	protein_coding	chr10	45374176	45446119	+		non-IFN			163.339	162.208	170.986	157.39	red	blue	0.193276	0.661201	-0.467925	-1.90832	6295.32	0.118334	0.0545867	0.320677	-0.0513615	0.00833112	-0.263596	N	Y	N	N
ALOX5AP	ENSG00000132965.9	protein_coding	chr13	30713478	30764426	+		non-IFN			121.443	128.032	123.069	115.358	yellow	greenyellow	0.117566	0.0369151	0.0806508	-0.652574	1417.26	0.0630882	0.62782	0.892964	-0.115191	-0.0698013	-0.219144	N	N	N	N
ALPK1	ENSG00000073331.17	protein_coding	chr4	112285509	112442620	+	Centrosome	non-IFN			3.26654	2.88234	3.916	2.96468	turquoise	turquoise	0.271683	0.0887543	0.182929	-2.17766	283.845	0.354989	0.0142502	0.139325	0.0782768	0.212781	-0.21361	N	N	N	N
ALS2	ENSG00000003393.14	protein_coding	chr2	201700554	201781189	-	Cytosol;Intermediate filaments	non-IFN			1.41488	1.11441	1.49533	1.556	greenyellow	magenta	0.159549	0.03614	0.123409	0.210434	110.375	-0.0205893	0.915769	0.982318	-0.0295066	0.0765563	-0.0722986	N	N	N	N
ALS2CL	ENSG00000178038.16	protein_coding	chr3	46668997	46693704	-		non-IFN			0.836973	0.663931	1.06896	0.754425	turquoise	pink	0.353503	0.045086	0.308417	-1.46415	52.9432	0.252075	0.197166	0.592405	-0.0719243	-0.052019	-0.2335	N	Y	N	N
ALYREF	ENSG00000183684.7	protein_coding	chr17	81887844	81891586	-		non-IFN			6.55248	5.82552	6.42779	7.17565	salmon	red	0.287365	0.100906	0.186459	0.512082	103.117	-0.147833	0.434888	0.797299	-0.0825794	-0.0882649	-0.0603642	N	N	N	N
AMACR	ENSG00000242110.7	protein_coding	chr5	33986178	34008108	-	Plasma membrane	non-IFN			2.14075	2.18092	1.92475	2.30298	salmon	turquoise	0.118146	0.0965848	0.021561	0.95871	8.60753	-0.0758293	0.711126	0.920664	-0.219375	-0.325727	-0.139074	N	N	N	N
AMBRA1	ENSG00000110497.14	protein_coding	chr11	46396414	46594125	-	Mitochondria;Vesicles	non-IFN			1.26731	1.10492	1.56904	1.11569	lightcyan	grey	0.0939022	0.0307425	0.0631598	-2.56421	106.162	0.3754	0.034922	0.249177	0.0645625	0.118887	-0.148402	N	N	N	N
AMD1	ENSG00000123505.15	protein_coding	chr6	110874770	110895713	+	Nucleoplasm	non-IFN			16.5198	16.7828	16.4406	16.404	red	blue	0.144487	0.0940929	0.0503938	-0.0315562	735.587	0.0461437	0.606411	0.884578	-0.0505304	0.253987	-0.396432	N	N	N	N
AMD1P4	ENSG00000215124.2	processed_pseudogene	chr6	11861626	11862970	-		non-IFN			0.922095	0.924269	0.911025	0.930327	yellow	turquoise	0.0883437	0.054701	0.0336427	0.28836	17.6045	-0.0431243	0.676313	0.908388	0.127805	0.0412053	0.288849	N	N	N	N
AMDHD1	ENSG00000139344.7	protein_coding	chr12	95943293	95968716	+	Actin filaments;Focal adhesion sites;Plasma membrane	non-IFN	Amino Acids	Chemicals and Drugs Category	0.741057	0.405298	0.970132	0.775939	orange	grey	0.131018	0.0154521	0.115566	-0.877218	30.2383	0.128052	0.533795	0.855869	0.0149272	-0.188207	0.1589	N	N	N	N
AMDHD2	ENSG00000162066.14	protein_coding	chr16	2520357	2531422	+	Cytosol;Nucleoli	non-IFN			4.72986	4.75253	4.87225	4.58823	turquoise	turquoise	0.294457	0.0359155	0.258542	-0.481697	86.0845	0.0609716	0.662445	0.90511	-0.146897	-0.126093	-0.216377	N	Y	N	N
AMFR	ENSG00000159461.14	protein_coding	chr16	56361452	56425538	-	Golgi apparatus	non-IFN			10.7083	10.1929	9.12769	12.4667	turquoise	red	0.256188	0.109642	0.146546	3.6147	615.354	-0.417052	9.11672e-05	0.0028293	-0.313914	-0.0141854	-0.294729	Y	N	N	N
AMMECR1	ENSG00000101935.9	protein_coding	chrX	110194186	110440233	-		non-IFN			1.89908	1.91696	2.13334	1.67974	grey	grey	0.10828	0.0220073	0.0862724	-1.70959	119.659	0.261312	0.112189	0.465393	-0.000488925	-0.0857881	-0.0996268	N	N	N	N
AMMECR1L	ENSG00000144233.9	protein_coding	chr2	127861630	127885922	-	Cytosol;Nucleus	non-IFN			1.47949	1.42904	1.39923	1.58592	grey	yellow	0.0781269	0.0327481	0.0453788	0.855933	113.421	-0.140915	0.433683	0.796959	0.0272575	0.0583179	0.0759309	N	N	N	N
AMN1	ENSG00000151743.10	protein_coding	chr12	31671137	31729174	-	Centrosome	non-IFN			4.09441	3.58446	4.66866	3.94769	orange	grey	0.133613	0.0293508	0.104262	-1.1769	45.3177	0.170682	0.288518	0.692489	-0.122745	-0.249258	0.0228311	N	N	N	N
AMPD2	ENSG00000116337.15	protein_coding	chr1	109616104	109632051	+		non-IFN			27.2123	28.7569	25.7311	27.4289	purple	tan	0.0824837	0.159413	-0.0769298	0.966087	1287.34	-0.0891164	0.371038	0.756406	-0.026353	-0.0182384	0.179536	N	N	N	N
AMPD3	ENSG00000133805.15	protein_coding	chr11	10308313	10507579	+		non-IFN			3.44394	3.53119	3.32959	3.48324	darkgreen	grey	0.176857	0.0401417	0.136716	0.441252	197.594	-0.0866228	0.494417	0.834795	0.0443455	0.169775	-0.0102048	N	N	N	N
AMT	ENSG00000145020.15	protein_coding	chr3	49416775	49422753	-	Nucleoplasm	non-IFN	Autoimmune Diseases	Immune System Diseases	3.32942	3.50029	2.70117	3.76315	orange	grey	0.122099	0.0301002	0.0919992	1.91969	9.01018	-0.123239	0.529661	0.853153	-0.175475	-0.0747549	-0.0126263	N	N	N	N
AMY1A	ENSG00000237763.9	protein_coding	chr1	103655290	103664554	+		non-IFN			1.1091	0.991116	1.13925	1.16578	turquoise	grey	0.152902	0.0304152	0.122487	0.207527	30.7616	-0.0653705	0.636607	0.895433	-0.130029	-0.234622	-0.0394356	N	N	N	N
AMY1B	ENSG00000174876.16	protein_coding	chr1	103687415	103696680	-		non-IFN			1.07615	1.07205	1.11472	1.04503	turquoise	grey	0.176033	0.0358692	0.140164	-0.634619	28.7287	0.0482588	0.722845	0.924802	-0.0806237	-0.200397	-0.0475649	N	N	N	N
AMY1C	ENSG00000187733.6	protein_coding	chr1	103750406	103758690	+		non-IFN			1.25455	1.14933	1.32954	1.26264	turquoise	grey	0.202212	0.0373686	0.164844	-0.495764	31.0289	0.0426243	0.750209	0.932791	-0.145284	-0.301722	-0.108794	N	N	N	N
AMY2A	ENSG00000243480.7	protein_coding	chr1	103616811	103625780	+		non-IFN			1.78869	1.72605	1.73498	1.88031	turquoise	grey	0.198023	0.0567835	0.14124	0.743038	43.6096	-0.122969	0.35695	0.745547	-0.101183	-0.186212	-0.0297497	N	N	N	N
AMY2B	ENSG00000240038.6	protein_coding	chr1	103553815	103579534	+		non-IFN			6.3793	6.03731	6.20116	6.7779	turquoise	grey	0.173912	0.0479839	0.125928	0.936709	179.455	-0.148699	0.225422	0.631018	-0.154402	-0.283033	-0.0115885	N	N	N	N
AMYP1	ENSG00000227408.1	unprocessed_pseudogene	chr1	103713723	103719871	+		non-IFN			1.99429	1.94412	2.04132	1.98822	turquoise	lightcyan	0.161124	0.0329949	0.128129	-0.24004	27.7519	0.0123034	0.926607	0.983754	-0.104239	-0.261417	0.0366682	N	N	N	N
AMZ2	ENSG00000196704.11	protein_coding	chr17	68247574	68257164	+	Cytosol;Nuclear bodies	non-IFN			43.1908	43.3229	42.4229	43.775	turquoise	blue	0.488602	0.189325	0.299277	0.444306	835.968	-0.0339238	0.70811	0.919528	-0.203246	-0.0684503	-0.212572	N	Y	N	N
AMZ2P1	ENSG00000214174.8	transcribed_unprocessed_pseudogene	chr17	64966550	64975576	-		non-IFN	White Matter	Anatomy Category	19.8488	21.2703	18.6461	19.9067	pink	blue	0.113129	0.064996	0.0481327	0.968302	360.621	-0.154983	0.0805058	0.395885	-0.118564	0.235298	-0.296113	N	N	N	N
ANAPC1	ENSG00000153107.11	protein_coding	chr2	111766271	111884690	-	Vesicles	non-IFN			1.79243	1.62614	1.9108	1.80538	darkred	grey	0.131623	0.0178469	0.113776	-0.445156	162.568	0.0155348	0.889221	0.973777	0.130103	0.257139	-0.109486	N	N	N	N
ANAPC10	ENSG00000164162.12	protein_coding	chr4	144967112	145098541	-	Golgi apparatus;Nucleoplasm	non-IFN			14.1805	14.0292	14.5083	13.9979	grey	blue	0.116206	0.0422036	0.0740025	-0.452982	162.773	0.0171236	0.871603	0.968315	-0.0703074	-0.0986225	-0.0825035	N	N	N	N
ANAPC11	ENSG00000141552.17	protein_coding	chr17	81890790	81900991	+		non-IFN			201.88	199.583	196.329	208.4	grey	black	0.149074	0.214641	-0.0655667	1.77582	1220.53	-0.0995565	0.114285	0.468254	0.00425364	0.224265	-0.106199	N	N	N	N
ANAPC13	ENSG00000129055.12	protein_coding	chr3	134477706	134486716	-	Cytosol;Mitochondria	non-IFN	Body Mass Index	Body Weights and Measures;Diagnostic Techniques and Procedures;Physical Examination	66.1435	66.6914	65.3453	66.4609	paleturquoise	blue	0.128469	0.0386356	0.0898335	0.298963	1170.2	-0.0274965	0.706497	0.919231	-0.154085	0.0542649	-0.306837	N	N	N	N
ANAPC15	ENSG00000110200.8	protein_coding	chr11	72106378	72112780	-	Nucleoplasm;Vesicles	non-IFN			98.9023	105.935	88.3865	103.217	grey	blue	0.104215	0.0387285	0.0654862	3.60735	339.155	-0.209059	0.00067349	0.0146605	-0.289786	0.0517881	-0.407328	Y	N	N	N
ANAPC16	ENSG00000166295.8	protein_coding	chr10	72216000	72235860	+		non-IFN			35.5959	36.4496	33.7991	36.5787	grey60	blue	0.26868	0.0757859	0.192894	1.70014	1807.4	-0.137342	0.0249815	0.202326	-0.281816	-0.0776821	-0.266882	N	N	N	N
ANAPC2	ENSG00000176248.8	protein_coding	chr9	137174784	137188549	-		non-IFN			7.0534	7.03977	7.30863	6.83781	darkturquoise	turquoise	0.187956	0.292244	-0.104289	-0.877398	293.526	0.0853039	0.375562	0.760495	-0.0955359	-0.105603	-0.177806	N	N	N	N
ANAPC4	ENSG00000053900.10	protein_coding	chr4	25377213	25418498	+	Intermediate filaments	non-IFN	Tonsillectomy	Other	12.9737	13.2757	12.4335	13.2372	white	blue	0.163181	0.159302	0.00387869	0.750413	538.518	-0.0863428	0.41672	0.789896	-0.0305578	0.229669	-0.187665	N	N	N	N
ANAPC5	ENSG00000089053.12	protein_coding	chr12	121308245	121399896	-	Nucleoplasm	non-IFN			49.9934	50.1827	47.5999	51.9717	yellow	brown	0.179861	0.343659	-0.163798	1.7043	1811.6	-0.126257	0.111435	0.463775	-0.301129	-0.177205	-0.310296	N	N	N	N
ANAPC7	ENSG00000196510.12	protein_coding	chr12	110372900	110403730	-	Cytosol;Nucleoplasm	non-IFN			8.8177	8.39396	10.1319	7.95724	grey	yellow	0.163812	0.154555	0.00925644	-2.26288	284.447	0.283625	0.0344425	0.247689	-0.062729	-0.25196	-0.01401	N	N	N	N
ANG	ENSG00000214274.9	protein_coding	chr14	20684177	20698971	+		non-IFN			12.1472	11.242	13.607	11.4981	grey	turquoise	0.152423	0.0976382	0.0547851	-1.50132	99.8337	0.147282	0.305515	0.70716	0.0331491	0.0725033	-0.0484297	N	N	N	N
ANGEL1	ENSG00000013523.9	protein_coding	chr14	76786178	76826246	-	Nucleoplasm	non-IFN			3.56098	3.38764	3.19173	4.00916	darkturquoise	turquoise	0.121009	0.157531	-0.0365218	1.86711	263.211	-0.193084	0.207888	0.605942	-0.232924	-0.207603	-0.191297	N	N	N	N
ANGEL2	ENSG00000174606.13	protein_coding	chr1	212992182	213015826	-	Mitochondria;Nucleoplasm	non-IFN			5.11681	4.65881	5.9715	4.68597	brown	blue	0.21365	0.0367554	0.176895	-3.23673	386.26	0.307073	0.000378118	0.00923379	0.247787	0.238	-0.0351115	Y	N	N	N
ANGPT1	ENSG00000154188.9	protein_coding	chr8	107249482	107498055	-		non-IFN			0.851771	0.912104	0.6032	1.02851	grey	grey	0.0649766	0.0434307	0.0215459	2.77711	19.1517	-0.542619	0.00428702	0.0593664	-0.12602	0.168424	-0.197697	N	N	N	N
ANKDD1A	ENSG00000166839.16	protein_coding	chr15	64911902	64958700	+	Nucleoplasm	non-IFN	Platelet Count	Diagnostic Techniques and Procedures	1.59024	1.41541	1.6967	1.6197	pink	grey	0.401346	0.0261721	0.375174	-0.318701	56.4551	-0.0169352	0.905243	0.978556	0.282965	0.38053	0.254602	N	Y	N	N
ANKFY1	ENSG00000185722.16	protein_coding	chr17	4163907	4263977	-		non-IFN			3.9612	3.38399	5.04773	3.40995	green	turquoise	0.163573	0.0670283	0.0965451	-4.01106	470.417	0.542478	6.75646e-06	0.000294782	0.206082	0.0650728	0.0243878	Y	N	N	N
ANKHD1	ENSG00000131503.20	protein_coding	chr5	140401814	140539856	+		non-IFN			19.8225	20.0147	19.8831	19.6333	darkred	brown	0.179872	0.185307	-0.00543485	-0.201108	70.7356	0.356691	0.00480123	0.0646415	-0.138781	-0.092543	-0.181265	N	N	N	N
ANKHD1-EIF4EBP3	ENSG00000254996.5	protein_coding	chr5	140401908	140549569	+		non-IFN			1.42041	1.24426	1.49135	1.48217	blue	grey	0.251582	0.0215839	0.229998	-0.0305204	3.30461	0.037402	0.854348	0.964194	-0.0871019	-0.137351	0.0249067	N	N	N	N
ANKIB1	ENSG00000001629.9	protein_coding	chr7	92246234	92401384	+		non-IFN			2.33511	2.30549	2.47556	2.23209	darkgreen	blue	0.232129	0.0653338	0.166795	-0.833446	233.312	0.11247	0.410851	0.785866	0.0622401	0.130821	0.0275012	N	N	N	N
ANKLE1	ENSG00000160117.14	protein_coding	chr19	17281645	17287646	+	Cytosol;Nucleoplasm	non-IFN			1.30908	1.21604	1.43239	1.26594	turquoise	turquoise	0.191955	0.0341472	0.157807	-0.678768	63.8249	0.110117	0.551942	0.86508	-0.0909644	-0.0907417	-0.124015	N	N	N	N
ANKLE2	ENSG00000176915.14	protein_coding	chr12	132725503	132761888	-	Plasma membrane	non-IFN			11.767	11.73	11.9095	11.6675	black	blue	0.124812	0.226225	-0.101413	-0.264642	881.782	0.0256843	0.807599	0.951431	-0.13883	0.136225	-0.334165	N	N	N	N
ANKMY1	ENSG00000144504.15	protein_coding	chr2	240479422	240569209	-	Cytosol;Nuclear bodies;Nucleus	non-IFN			4.21188	4.41222	3.74024	4.48662	blue	turquoise	0.14316	0.0427997	0.10036	1.73932	190.403	-0.251743	0.0652071	0.352812	-0.238375	-0.235748	-0.107583	N	N	N	N
ANKMY2	ENSG00000106524.8	protein_coding	chr7	16599776	16645817	-	Cytosol;Nucleoplasm	non-IFN			5.69364	4.83711	7.14841	5.01462	cyan	grey	0.115541	0.0167713	0.0987692	-2.11371	160.849	0.200562	0.261916	0.667176	0.147851	0.195218	-0.00726445	N	N	N	N
ANKRA2	ENSG00000164331.9	protein_coding	chr5	73552335	73565686	-	Cell Junctions;Plasma membrane	non-IFN			8.71206	7.72435	9.07784	9.08651	darkred	blue	0.109224	0.0960046	0.0132192	0.0125222	293.626	-0.0131041	0.903743	0.978283	-0.0874442	-0.063947	-0.146846	N	N	N	N
ANKRD10	ENSG00000088448.14	protein_coding	chr13	110878540	110915069	-	Cytosol;Microtubules	non-IFN			62.7734	58.8863	64.7871	63.7404	steelblue	magenta	0.261627	0.194323	0.0673043	-0.251999	1664.23	0.0201508	0.807969	0.951431	0.029531	0.105152	-0.0527538	N	N	N	N
ANKRD10-IT1	ENSG00000229152.2	sense_intronic	chr13	110894639	110899172	-		non-IFN			2.14885	1.73281	2.20696	2.39126	brown	brown	0.13869	0.034279	0.104411	0.574576	35.4371	-0.186082	0.229904	0.634852	0.038625	0.236874	-0.0406464	N	N	N	N
ANKRD11	ENSG00000167522.14	protein_coding	chr16	89267627	89490561	-		non-IFN			2.64055	2.69938	2.74727	2.50484	purple	grey	0.233506	0.0284604	0.205045	-0.687844	228.309	0.161012	0.226549	0.632488	0.167994	0.0713775	0.228484	N	N	N	N
ANKRD12	ENSG00000101745.16	protein_coding	chr18	9136228	9285985	+	Cytosol	non-IFN			9.76852	9.24301	10.5691	9.43305	greenyellow	brown	0.226924	0.129525	0.097399	-1.92921	1526.49	0.158844	0.0451515	0.287547	0.0902555	0.320185	-0.254775	N	N	N	N
ANKRD13A	ENSG00000076513.16	protein_coding	chr12	109999186	110039763	+		non-IFN			13.5828	13.036	14.1392	13.4779	grey	midnightblue	0.091713	0.143846	-0.0521326	-0.77129	893.133	0.0626773	0.452664	0.808876	-0.04547	0.207377	-0.306318	N	N	N	N
ANKRD13C	ENSG00000118454.12	protein_coding	chr1	70260588	70354734	-		non-IFN			5.97508	5.94473	6.27032	5.736	turquoise	yellow	0.138309	0.05375	0.0845589	-1.30713	368.679	0.0965963	0.286795	0.691525	-0.00946069	-0.0414305	-0.145981	N	N	N	N
ANKRD13D	ENSG00000172932.14	protein_coding	chr11	67288547	67302485	+	Mitochondria;Nucleus	non-IFN			12.1203	11.8395	12.7342	11.7768	blue	grey	0.170455	0.0324264	0.138029	-1.37783	397.781	0.0980735	0.203094	0.599621	0.207915	0.194543	0.116577	N	N	N	N
ANKRD16	ENSG00000134461.15	protein_coding	chr10	5861617	5889906	-	Endoplasmic reticulum	non-IFN			1.63066	1.64332	1.94044	1.34839	turquoise	pink	0.232888	0.0668073	0.166081	-1.45178	51.107	0.279507	0.123529	0.48362	-0.0514593	-0.15604	-0.0487756	N	N	N	N
ANKRD17	ENSG00000132466.17	protein_coding	chr4	73073376	73258798	-	Nuclear membrane	non-IFN			5.2273	4.88784	5.39172	5.32185	blue	blue	0.238521	0.127757	0.110764	-0.151684	735.439	0.0132508	0.896854	0.976098	-0.152716	-0.0961457	-0.214647	N	N	N	N
ANKRD18EP	ENSG00000217165.1	processed_pseudogene	chr6	39110321	39112952	+		non-IFN			1.023	1.14587	1.10818	0.861103	darkred	grey	0.118842	0.0158204	0.103021	-1.26732	41.0682	0.203351	0.317749	0.715952	0.209041	0.209497	0.268634	N	N	N	N
ANKRD22	ENSG00000152766.5	protein_coding	chr10	88822132	88851818	-	Nucleus	non-IFN			7.00041	3.54482	14.3775	2.93045	midnightblue	midnightblue	0.349537	0.0314675	0.31807	-3.92485	203.431	1.43391	8.13918e-13	1.0543e-10	0.251772	0.200622	-0.102221	Y	Y	Y	N
ANKRD26	ENSG00000107890.16	protein_coding	chr10	26991914	27100498	-	Golgi apparatus;Vesicles	non-IFN			0.949175	0.976231	0.938819	0.939213	grey	lightcyan	0.0875025	0.0192954	0.0682071	0.00342312	103.659	-0.00958435	0.953	0.989486	0.0379161	-0.0333245	0.0830223	N	N	N	N
ANKRD27	ENSG00000105186.15	protein_coding	chr19	32597007	32676597	-		non-IFN	Eosinophilic Esophagitis	Digestive System Diseases;Hemic and Lymphatic Diseases;Immune System Diseases	6.23886	5.7687	6.99755	5.9013	blue	turquoise	0.305768	0.117768	0.188	-1.45864	459.922	0.204201	0.157802	0.536287	-0.170806	-0.398543	0.0278471	N	N	N	N
ANKRD35	ENSG00000198483.12	protein_coding	chr1	145866560	145885866	-		non-IFN			1.03786	0.985823	0.984976	1.12125	grey	pink	0.0796617	0.0468019	0.0328598	0.593213	51.5894	-0.118601	0.561302	0.868302	-0.100014	0.0696071	-0.289886	N	N	N	N
ANKRD36	ENSG00000135976.16	protein_coding	chr2	97113496	97264521	+	Cytosol;Nucleus	non-IFN			2.1328	2.09219	2.03715	2.24587	brown	green	0.124002	0.0579346	0.0660675	0.899828	154.786	-0.0485674	0.716925	0.92322	0.0864174	0.134199	0.175039	N	N	N	N
ANKRD36B	ENSG00000196912.12	protein_coding	chr2	97492663	97589965	-	Cytosol;Nucleus	non-IFN			1.75811	1.80681	1.53167	1.92355	brown	green	0.0933605	0.0507066	0.0426539	1.94311	149.841	-0.343761	0.00841625	0.0962442	-0.0195081	0.0535894	0.079736	N	N	N	N
ANKRD36C	ENSG00000174501.14	protein_coding	chr2	95836919	95991831	-	Cytosol;Nucleus	non-IFN			6.96807	7.18492	6.56891	7.1672	brown	purple	0.25192	0.051479	0.200441	0.714192	181.014	-0.032568	0.823515	0.954471	0.232826	0.359364	0.189568	N	N	N	N
ANKRD37	ENSG00000186352.8	protein_coding	chr4	185396021	185400628	+	Mitochondria	non-IFN			2.67603	3.05182	2.41599	2.64021	purple	grey	0.117671	0.0303108	0.0873597	0.555551	44.689	-0.11547	0.495456	0.835576	-0.122133	-0.118212	0.0114156	N	N	N	N
ANKRD39	ENSG00000213337.8	protein_coding	chr2	96836611	96858095	-	Nucleoplasm;Vesicles	non-IFN			9.37065	9.07476	9.26788	9.67019	turquoise	turquoise	0.103019	0.0438513	0.0591672	0.472372	123.867	-0.0510942	0.688458	0.91151	-0.103188	-0.0801589	-0.190605	N	N	N	N
ANKRD40	ENSG00000154945.6	protein_coding	chr17	50693190	50707924	-	Cytosol;Golgi apparatus	non-IFN			2.84849	2.56998	3.06455	2.85444	darkgreen	brown	0.144979	0.0468881	0.0980909	-0.918669	152.139	0.069033	0.517054	0.847622	0.104019	0.206477	-0.0162585	N	N	N	N
ANKRD42	ENSG00000137494.13	protein_coding	chr11	83193739	83260694	+	Cytosol;Nucleoplasm;Plasma membrane	non-IFN			3.56905	3.98878	3.15148	3.6412	darkgreen	grey	0.104411	0.0222655	0.0821452	1.1638	121.667	-0.150743	0.308018	0.709789	0.022735	0.292715	-0.0991079	N	N	N	N
ANKRD44	ENSG00000065413.17	protein_coding	chr2	196967017	197311173	-	Mitochondria;Nuclear speckles	non-IFN	Schizophrenia	Mental Disorders;Other	9.00498	8.24025	9.25817	9.32138	grey	grey	0.13674	0.0288775	0.107862	0.0759263	51.915	-0.0343594	0.805283	0.950606	0.214882	0.120238	0.338489	N	N	N	N
ANKRD44-IT1	ENSG00000236977.1	sense_intronic	chr2	197250858	197302519	-		non-IFN	Intracranial Aneurysm	Cardiovascular Diseases;Nervous System Diseases	1.41434	1.01394	1.97696	1.20056	turquoise	grey	0.585064	0.0412062	0.543858	-1.78286	29.0165	0.405904	0.0339528	0.245864	0.327579	0.249033	0.377233	N	Y	N	N
ANKRD46	ENSG00000186106.11	protein_coding	chr8	100509752	100559784	-	Cytosol	non-IFN			3.04785	2.54135	3.28426	3.19678	cyan	yellow	0.186171	0.0463791	0.139792	-0.144252	99.9646	0.116087	0.524715	0.850745	0.0562019	0.204225	-0.0249067	N	N	N	N
ANKRD49	ENSG00000168876.8	protein_coding	chr11	94493629	94499583	+	Golgi apparatus;Nucleoli;Nucleus	non-IFN			24.9146	22.9598	26.6387	24.7732	turquoise	black	0.729842	0.0552924	0.67455	-1.04461	684.511	0.036144	0.693127	0.91367	0.11832	0.066649	0.0264634	N	Y	N	N
ANKRD50	ENSG00000151458.11	protein_coding	chr4	124664052	124712732	-	Cytosol;Nucleoplasm	non-IFN			1.65887	1.7952	1.33676	1.84685	grey	brown	0.121009	0.0919832	0.0290258	2.63726	216.445	-0.330088	0.0511727	0.309258	-0.193419	-0.114159	-0.133528	N	N	N	N
ANKRD54	ENSG00000100124.13	protein_coding	chr22	37830855	37849327	-	Microtubules;Midbody;Nucleoplasm	non-IFN			5.64678	5.77711	4.45686	6.60471	green	turquoise	0.124951	0.0522992	0.072652	3.61624	170.05	-0.494662	0.000536559	0.0122831	-0.161101	0.151987	-0.242494	Y	N	N	N
ANKS1A	ENSG00000064999.13	protein_coding	chr6	34889265	35091413	+	Cytosol;Nucleoplasm	non-IFN			1.58553	1.52707	1.64548	1.57391	purple	greenyellow	0.0943721	0.0198742	0.0744979	-0.40868	169.54	0.0403972	0.778162	0.941667	-0.11233	-0.158066	-0.123669	N	N	N	N
ANKS3	ENSG00000168096.14	protein_coding	chr16	4696510	4734378	-		non-IFN			1.76663	1.91491	1.55776	1.84625	grey	grey	0.0889637	0.0311241	0.0578396	1.14815	55.3981	-0.167335	0.364973	0.752376	0.0951447	0.0398543	0.316177	N	N	N	N
ANKZF1	ENSG00000163516.13	protein_coding	chr2	219229757	219236669	+	Cytosol;Nuclear bodies;Nucleoplasm	non-IFN			11.607	12.3103	11.0946	11.5625	steelblue	turquoise	0.235967	0.174785	0.0611816	0.498952	447.917	-0.063875	0.564604	0.869153	-0.135334	-0.209179	-0.138025	N	N	N	N
ANO10	ENSG00000160746.12	protein_coding	chr3	43354859	43691594	-		non-IFN			13.1223	13.2249	14.222	12.0795	red	blue	0.152599	0.0475547	0.105045	-1.61854	447.873	0.195871	0.111777	0.464363	-0.210946	-0.177656	-0.293864	N	N	N	N
ANO6	ENSG00000177119.15	protein_coding	chr12	45215987	45440404	+		non-IFN			8.0604	8.03405	7.8191	8.2919	lightgreen	lightyellow	0.133157	0.0883292	0.0448282	0.794509	756.098	-0.0968422	0.323401	0.721181	-0.0183591	0.192742	-0.154975	N	N	N	N
ANO7P1	ENSG00000237276.8	transcribed_unprocessed_pseudogene	chr1	16215909	16228027	-		non-IFN			1.77305	1.42546	3.0396	0.90087	purple	red	0.177276	0.0401281	0.137147	-3.04515	7.55778	0.703281	0.000663334	0.0145619	-0.0917296	-0.102512	-0.310135	Y	N	N	N
ANP32A	ENSG00000140350.15	protein_coding	chr15	68778535	68820897	-		non-IFN			77.321	75.598	80.4709	75.7579	red	turquoise	0.283426	0.271725	0.0117008	-1.51375	1599.75	0.0817205	0.0481586	0.299902	-0.0218794	-0.0072053	-0.144251	N	N	N	N
ANP32AP1	ENSG00000259516.2	transcribed_processed_pseudogene	chr15	35181799	35238197	+		non-IFN			3.49025	3.51323	3.65585	3.3279	red	turquoise	0.277951	0.0712085	0.206743	-1.74728	50.3241	0.109637	0.136466	0.505866	-0.040703	0.131497	-0.353883	N	N	N	N
ANP32B	ENSG00000136938.8	protein_coding	chr9	97983361	98015943	+		non-IFN			24.2542	24.4289	23.6149	24.6948	black	grey	0.171403	0.0234483	0.147955	0.847583	518.489	-0.0827882	0.26628	0.671172	-0.04569	-0.0824106	0.191643	N	N	N	N
ANP32C	ENSG00000248546.3	processed_pseudogene	chr4	164197007	164197711	-		non-IFN			0.782273	0.873988	0.847751	0.659758	grey	purple	0.0758739	0.0210679	0.0548061	-2.21203	6.34512	0.287516	0.0529746	0.316303	-0.0236151	-0.124742	-0.237997	N	N	N	N
ANP32E	ENSG00000143401.14	protein_coding	chr1	150218417	150236156	-	Centrosome;Cytosol	non-IFN	Schizophrenia	Mental Disorders;Other	20.7024	20.1743	21.7896	20.1159	lightgreen	tan	0.309214	0.11129	0.197924	-0.94544	1014.94	0.109811	0.291913	0.695023	0.152276	0.437497	-0.197178	N	N	N	N
ANPEP	ENSG00000166825.13	protein_coding	chr15	89784889	89815401	-		non-IFN			79.8552	83.3134	77.745	79.2759	darkgrey	turquoise	0.0779381	0.105008	-0.0270702	0.181916	4596.67	-0.0152452	0.91552	0.982318	-0.225345	-0.209404	-0.272417	N	N	N	N
ANTXR2	ENSG00000163297.16	protein_coding	chr4	79901149	80125454	-		non-IFN			17.6363	17.7526	16.265	18.7642	grey	turquoise	0.169387	0.146089	0.023298	1.64395	905.411	-0.139466	0.196797	0.592237	-0.187845	-0.133523	-0.0676286	N	N	N	N
ANXA1	ENSG00000135046.13	protein_coding	chr9	73151757	73170393	+		non-IFN			863.833	789.73	841.525	935.825	yellow	greenyellow	0.185147	0.131442	0.0537058	1.84717	19761.5	-0.157071	0.0494629	0.304561	-0.362098	-0.114159	-0.514393	N	N	N	N
ANXA11	ENSG00000122359.17	protein_coding	chr10	80150889	80205572	-		non-IFN			77.5354	74.8331	79.1165	78.048	saddlebrown	turquoise	0.185865	0.571268	-0.385403	-0.326775	3173.68	0.00602891	0.917221	0.982318	-0.260548	-0.0317483	-0.530997	N	Y	N	N
ANXA2	ENSG00000182718.16	protein_coding	chr15	60347134	60402883	-		non-IFN			1656.17	1579.15	1798.99	1584.53	red	blue	0.349878	0.457461	-0.107583	-2.58676	34929.7	0.168809	0.00893036	0.1004	-0.0524372	0.0803841	-0.435175	N	N	N	N
ANXA2P1	ENSG00000213406.3	processed_pseudogene	chr4	153307792	153308717	-		non-IFN			12.0306	11.4791	12.9507	11.6081	red	blue	0.222533	0.342101	-0.119569	-2.014	148.271	0.144033	0.0568715	0.327821	-0.154231	-0.108755	-0.388648	N	N	N	N
ANXA2P2	ENSG00000231991.4	processed_pseudogene	chr9	33624274	33625293	+		non-IFN			338.611	322.105	368.735	323.683	red	blue	0.342617	0.468412	-0.125795	-2.55838	4719.7	0.17344	0.00928776	0.103419	-0.0374761	0.0945695	-0.432754	N	N	N	N
ANXA2P3	ENSG00000216740.2	processed_pseudogene	chr10	64825572	64826579	+		non-IFN			3.47613	3.31346	3.85621	3.25559	blue	brown	0.200925	0.126307	0.0746181	-3.14592	47.8483	0.220648	0.00446432	0.0610114	-0.107612	-0.10898	-0.402485	N	N	N	N
ANXA2R	ENSG00000177721.4	protein_coding	chr5	43039081	43043170	-	Cytoplasmic bodies;Cytosol;Nucleoplasm	non-IFN			3.50279	3.35986	3.92235	3.23348	grey	magenta	0.132311	0.0314958	0.100816	-1.4445	102.886	0.115893	0.40247	0.779343	0.0798903	0.10898	0.00622668	N	N	N	N
ANXA4	ENSG00000196975.15	protein_coding	chr2	69644425	69827100	+	Cytosol	non-IFN			35.367	34.0705	42.0141	30.4171	saddlebrown	darkturquoise	0.194791	0.105584	0.0892072	-4.8833	929.272	0.420846	5.36016e-07	3.05427e-05	0.110326	-0.0529139	-0.13076	Y	N	N	N
ANXA5	ENSG00000164111.14	protein_coding	chr4	121667955	121697113	-	Nuclear membrane	non-IFN			456.318	440.411	470.984	454.607	green	blue	0.181109	0.184838	-0.00372854	-0.877596	9739.46	0.0429854	0.397788	0.775425	-0.136679	-0.00247682	-0.31168	N	N	N	N
ANXA6	ENSG00000197043.13	protein_coding	chr5	151100712	151157882	-		non-IFN			51.0129	49.2806	54.3073	49.3289	saddlebrown	blue	0.22588	0.0838485	0.142031	-1.0032	1905.09	0.119896	0.331359	0.72618	-0.0490636	-0.10943	-0.109486	N	N	N	N
ANXA7	ENSG00000138279.15	protein_coding	chr10	73375101	73414076	-	Cytosol;Nucleoplasm	non-IFN			66.8598	69.2373	65.1773	66.6661	lightgreen	brown	0.344458	0.605049	-0.260591	0.454928	2348.42	-0.0431415	0.498655	0.837517	-0.0335647	0.355536	-0.39107	N	Y	N	N
ANXA8	ENSG00000265190.6	protein_coding	chr10	47460162	47484158	-	Nucleoplasm	non-IFN			0.609602	0.473072	0.797556	0.540135	brown	grey	0.168186	0.0230428	0.145143	-1.04846	19.7508	0.119016	0.49632	0.835882	-0.00259862	0.132168	-0.224025	N	N	N	N
ANXA8L1	ENSG00000264230.7	protein_coding	chr10	46375627	46537864	+	Nucleoplasm	non-IFN			0.817874	0.656669	0.990767	0.779114	brown	grey	0.180257	0.022167	0.15809	-0.635319	17.8226	0.0558002	0.742039	0.930558	-0.0165715	0.170232	-0.225951	N	N	N	N
ANXA9	ENSG00000143412.9	protein_coding	chr1	150982017	150995634	+	Cytosol;Nuclear speckles	non-IFN			0.633681	0.80737	0.398523	0.718569	orange	blue	0.123241	0.062827	0.0604144	2.27423	16.6408	-0.381657	0.0647258	0.351254	-0.439539	-0.257208	-0.456623	N	N	N	N
AOAH	ENSG00000136250.11	protein_coding	chr7	36512949	36724549	-		non-IFN			193.609	194.57	190.877	195.342	brown	brown	0.189582	0.279576	-0.0899939	0.429234	7190.58	-0.0410374	0.550508	0.864165	-0.162567	-0.00562914	-0.221912	N	N	N	N
AP000240.9	ENSG00000273017.1	sense_intronic	chr21	29359002	29359453	+		non-IFN			1.35393	1.28908	1.8248	0.984229	turquoise	blue	0.18338	0.0777188	0.105661	-1.94224	7.61395	0.306863	0.132608	0.499916	-0.0497894	-0.506862	0.284451	N	N	N	N
AP000254.8	ENSG00000273271.1	antisense	chr21	31666728	31667247	-		non-IFN			1.68917	1.7572	1.98567	1.37953	pink	red	0.133491	0.025042	0.108449	-1.40133	9.11527	0.276506	0.178964	0.568569	0.238004	0.247117	0.164937	N	N	N	N
AP000281.1	ENSG00000224427.1	processed_pseudogene	chr21	32841496	32841811	-		non-IFN			7.92	7.87695	6.82998	8.91217	grey	brown	0.0856262	0.0986223	-0.0129961	3.43644	15.6625	-0.394371	0.00169373	0.0286711	-0.155234	-0.247457	0.240246	Y	N	N	N
AP000344.4	ENSG00000227755.1	transcribed_processed_pseudogene	chr22	23446598	23460833	+		non-IFN			22.6795	22.0073	21.9073	23.8353	yellow	pink	0.0939045	0.0352273	0.0586772	0.423134	8.32323	0.00985584	0.95552	0.990623	-0.226665	0.0711523	-0.531689	N	N	N	N
AP000347.2	ENSG00000272578.5	transcribed_unprocessed_pseudogene	chr22	23658094	23717356	-		non-IFN			1.30598	1.33749	1.43616	1.16887	tan	grey	0.0571978	0.0192945	0.0379033	-1.28459	31.9492	-0.039165	0.78913	0.944791	0.182344	0.0821854	0.23696	N	N	N	N
AP000347.4	ENSG00000234353.2	transcribed_unprocessed_pseudogene	chr22	23638492	23640762	-		non-IFN			4.63151	3.74074	5.11265	4.83575	sienna3	grey	0.343473	0.0177449	0.325728	-0.34155	4.64474	-0.277169	0.179581	0.568569	0.0899377	0.0101324	0.165353	N	Y	N	N
AP000354.2	ENSG00000215464.4	processed_pseudogene	chr22	24269346	24270134	-		non-IFN			1.04978	1.02439	1.03937	1.07688	brown	brown	0.0881824	0.151799	-0.0636162	0.229827	4.59866	-0.0903091	0.619825	0.889793	0.177895	0.0702516	0.236787	N	N	N	N
AP000357.4	ENSG00000224334.1	processed_pseudogene	chr22	24686923	24688087	+		non-IFN			3.41624	3.46599	3.32385	3.46264	paleturquoise	blue	0.246144	0.222551	0.0235933	0.521575	54.8059	-0.0590484	0.564195	0.869067	-0.0294577	0.264344	-0.275876	N	N	N	N
AP000361.2	ENSG00000237472.1	processed_pseudogene	chr22	22988263	22988581	+		non-IFN			8.48332	8.34032	8.95637	8.16686	saddlebrown	blue	0.098452	0.0370809	0.0613711	-1.3548	17.0421	0.11292	0.268195	0.672985	0.0545884	0.21706	-0.313063	N	N	N	N
AP000437.3	ENSG00000279549.1	TEC	chr11	61143380	61145464	-		non-IFN			1.18967	1.2196	1.17287	1.18338	purple	blue	0.14488	0.0460734	0.0988064	0.0767415	37.5395	-0.051726	0.705288	0.919011	0.135945	0.214583	0.20894	N	N	N	N
AP000476.1	ENSG00000237484.5	lincRNA	chr21	24428740	24547942	+		non-IFN			1.79877	1.68004	2.01626	1.69067	yellow	green	0.146835	0.106925	0.03991	-3.32929	84.1036	0.235081	0.00245269	0.0386044	0.273407	0.0592185	0.271206	Y	N	N	N
AP000487.4	ENSG00000254495.1	antisense	chr11	70358198	70358677	-		non-IFN			1.1819	1.32937	1.28027	0.991	royalblue	grey	0.103099	0.0252303	0.0778688	-1.87273	3.73605	0.231812	0.18807	0.579522	0.09094	-0.0153113	0.0496404	N	N	N	N
AP000568.2	ENSG00000229336.1	processed_pseudogene	chr21	19739709	19740150	+		non-IFN			1.28447	1.28363	1.16769	1.38809	cyan	purple	0.161656	0.0225479	0.139109	1.24023	5.19349	-0.230641	0.169989	0.555488	-0.0810637	-0.135099	0.0790442	N	N	N	N
AP000580.1	ENSG00000219529.2	processed_pseudogene	chr11	77813319	77813676	-		non-IFN			1.8044	1.76878	1.8767	1.76575	yellowgreen	grey	0.185833	0.0236213	0.162211	-0.245842	5.32189	0.0890045	0.66388	0.90511	0.117003	0.13942	0.151516	N	N	N	N
AP000620.1	ENSG00000255059.1	processed_pseudogene	chr11	100666459	100666962	+		non-IFN			3.54929	3.54454	3.69487	3.42419	grey	cyan	0.0884232	0.0288109	0.0596123	-1.19641	18.0862	0.0726623	0.484158	0.827836	0.132401	0.203324	0.01868	N	N	N	N
AP000654.5	ENSG00000271318.1	processed_pseudogene	chr11	86821143	86821728	-		non-IFN			1.47621	1.39316	1.65529	1.37681	brown	purple	0.17236	0.0272095	0.14515	-1.36629	9.63005	0.205913	0.166516	0.548709	0.103823	0.105828	0.0148748	N	N	N	N
AP000662.9	ENSG00000213592.4	processed_pseudogene	chr11	57718044	57718530	-		non-IFN			5.56083	5.37802	5.80942	5.47054	darkmagenta	turquoise	0.0818868	0.0392614	0.0426255	-0.953301	27.1149	0.0557456	0.5717	0.871953	0.12514	0.118212	0.0404734	N	N	N	N
AP000687.1	ENSG00000280170.1	protein_coding	chr21	35898055	35898429	-		non-IFN			9.35214	8.43638	9.6763	9.71254	blue	green	0.16001	0.0804567	0.079553	0.0513995	28.2866	-0.0307778	0.778381	0.941706	0.178726	0.0472848	0.331916	N	N	N	N
AP000692.9	ENSG00000228107.1	sense_overlapping	chr21	36360630	36362040	+		non-IFN			5.58635	5.0064	5.86381	5.7509	yellowgreen	green	0.238191	0.0510925	0.187099	-0.304035	39.8416	-0.015489	0.859801	0.965285	0.175353	0.18396	0.187319	N	N	N	N
AP000892.6	ENSG00000280143.1	TEC	chr11	117204967	117210292	+		non-IFN			2.75479	2.57987	3.10465	2.56955	yellow	blue	0.115004	0.17878	-0.0637767	-2.90089	41.4645	-0.0975764	0.573229	0.872388	0.18254	-0.0218411	0.140965	N	N	N	N
AP000936.1	ENSG00000234268.1	processed_pseudogene	chr11	117035797	117036051	-		non-IFN			219.81	211.749	213.794	230.808	violet	brown	0.268128	0.43989	-0.171762	1.85102	242.332	-0.148439	0.0553327	0.322717	-0.0283576	-0.0520132	0.0975513	N	N	N	N
AP001055.6	ENSG00000225331.1	lincRNA	chr21	44158740	44160076	-		non-IFN			4.84818	5.01392	4.80032	4.77342	brown	tan	0.175839	0.0331764	0.142662	-0.0399608	48.4723	0.0435224	0.790364	0.945169	-0.0335891	0.120238	-0.207037	N	N	N	N
AP001056.1	ENSG00000237604.1	lincRNA	chr21	44175489	44176453	+		non-IFN			2.60782	2.68137	2.70063	2.47401	darkred	grey	0.126174	0.0282046	0.0979691	-0.498227	28.0651	0.0650967	0.722877	0.924802	0.096856	0.300146	-0.0769686	N	N	N	N
AP001059.7	ENSG00000275799.1	lincRNA	chr21	44244545	44244993	+		non-IFN			2.20746	1.97454	2.13693	2.43411	grey	red	0.086857	0.0447918	0.0420652	1.1869	9.48197	-0.18984	0.189144	0.581455	0.26243	0.351709	0.347137	N	N	N	N
AP001257.1	ENSG00000254952.1	lincRNA	chr11	60159687	60160822	-		non-IFN			11.8145	12.6956	10.6382	12.2305	grey	salmon	0.0911267	0.0661563	0.0249705	0.963573	43.3745	-0.190369	0.247256	0.651354	0.139392	0.162119	0.202021	N	N	N	N
AP001258.4	ENSG00000245571.6	lincRNA	chr11	59130133	59143015	-		non-IFN			1.54546	1.46014	1.77928	1.39938	midnightblue	grey	0.143945	0.0203001	0.123645	-1.71885	53.2496	0.264094	0.137992	0.508946	-0.0321468	-0.0896159	-0.221047	N	N	N	N
AP001372.2	ENSG00000254837.2	lincRNA	chr11	74493366	74498533	+		non-IFN			1.11385	1.21146	0.897665	1.23569	grey	blue	0.106863	0.084939	0.0219241	1.81412	33.0609	-0.246613	0.232625	0.637502	-0.044541	0.165046	-0.116577	N	N	N	N
AP001432.14	ENSG00000242553.1	lincRNA	chr21	37221419	37237744	+		non-IFN			1.11312	1.17172	1.25568	0.94597	grey	grey	0.110337	0.0283228	0.0820138	-1.02347	7.06116	0.190472	0.351056	0.740417	-0.0870444	-0.224581	0.0192196	N	N	N	N
AP001437.1	ENSG00000273210.1	antisense	chr21	37365477	37365932	-		non-IFN			0.929982	1.02979	0.48855	1.24903	darkorange	grey	0.0705023	0.0247492	0.0457531	2.74424	4.37429	-0.391022	0.0396577	0.26626	-0.113221	0.11624	-0.102717	N	N	N	N
AP001442.2	ENSG00000233783.7	processed_transcript	chr21	25928754	25942686	+		non-IFN			2.07693	1.76815	2.15975	2.22182	paleturquoise	grey	0.122394	0.0266582	0.0957356	0.268424	26.515	-0.125531	0.412615	0.787232	-0.0150344	-0.198371	0.075066	N	N	N	N
AP001610.5	ENSG00000228318.3	antisense	chr21	41441056	41445708	-		non-IFN			17.3993	8.40579	38.1786	5.41285	green	salmon	0.46161	0.135712	0.325898	-10.6518	3.76446	0.775456	9.02858e-05	0.00281113	0.36464	0.292715	-0.0155667	Y	Y	Y	Y
AP002381.2	ENSG00000234751.1	processed_pseudogene	chr11	72940498	72941112	+		non-IFN			5.42484	5.95953	4.72139	5.66811	magenta	blue	0.161649	0.105729	0.0559199	2.659	37.032	-0.261966	0.0151159	0.145	0.0761989	0.100874	0.378616	N	N	N	N
AP002954.4	ENSG00000255422.1	antisense	chr11	118704607	118750263	+		non-IFN	Body Height	Body Weights and Measures;Diagnostic Techniques and Procedures;Physical Examination	10.2683	10.0482	12.564	8.39807	purple	grey	0.176257	0.0215338	0.154723	-1.82493	47.8506	0.339369	0.0919684	0.422095	0.0777033	-0.0861354	0.0648612	N	N	N	N
AP003068.18	ENSG00000255200.1	transcribed_processed_pseudogene	chr11	65174117	65176470	-		non-IFN			17.0772	16.699	18.957	15.6854	yellow	turquoise	0.322346	0.11957	0.202775	-2.82022	233.247	0.27551	0.00133503	0.0241004	0.118809	0.286411	-0.260656	Y	N	N	N
AP003068.23	ENSG00000254614.2	antisense	chr11	65177606	65181834	-		non-IFN			0.890884	1.10332	0.832303	0.792618	greenyellow	grey	0.113486	0.0491333	0.0643529	-0.238231	19.3615	0.0634061	0.756033	0.934456	0.103217	0.165046	0.0320089	N	N	N	N
AP003774.4	ENSG00000181908.5	lincRNA	chr11	64449074	64451657	+		non-IFN			2.44133	2.99505	2.33132	2.14754	tan	grey	0.10624	0.0367051	0.0695352	-0.524145	82.0999	0.0714715	0.690119	0.912005	-0.0313645	-0.168199	0.142868	N	N	N	N
AP003774.6	ENSG00000231680.1	lincRNA	chr11	64394342	64395831	-		non-IFN			6.81658	5.992	7.68042	6.63641	steelblue	yellow	0.15034	0.0440642	0.106276	-1.07149	97.0616	0.158514	0.32156	0.719727	0.0287977	-0.111457	0.0340738	N	N	N	N
AP006222.2	ENSG00000228463.9	lincRNA	chr1	257864	297502	-		non-IFN			1.15567	1.06838	1.15476	1.21808	turquoise	grey	0.260099	0.0228141	0.237285	0.4298	31.5195	-0.101007	0.548723	0.863181	-0.0265486	0.0114834	0.0124534	N	N	N	N
AP006621.5	ENSG00000255284.1	lincRNA	chr11	777578	784297	+		non-IFN			2.8619	2.94532	2.46696	3.15149	grey	turquoise	0.0869521	0.0320704	0.0548816	1.38905	23.8981	-0.262252	0.172766	0.559939	-0.117611	-0.195669	-0.0302686	N	N	N	N
AP1AR	ENSG00000138660.11	protein_coding	chr4	112231737	112270047	+		non-IFN			6.14012	6.31876	6.53688	5.66393	grey60	red	0.0960112	0.0254188	0.0705924	-1.41819	260.411	0.180648	0.201837	0.597554	0.0849506	0.0927682	-0.119864	N	N	N	N
AP1B1	ENSG00000100280.16	protein_coding	chr22	29327680	29423179	-		non-IFN			35.8508	36.3505	34.8482	36.3827	grey	blue	0.172272	0.333114	-0.160842	0.853016	2065.84	-0.0527074	0.494759	0.835143	-0.410257	-0.303748	-0.424625	N	N	N	N
AP1G1	ENSG00000166747.12	protein_coding	chr16	71729000	71809201	-		non-IFN			5.03899	4.80952	5.05178	5.18968	darkgreen	royalblue	0.267765	0.0736637	0.194101	0.321873	559.2	-0.0508633	0.607459	0.884834	0.0440521	0.0193642	0.0294037	N	N	N	N
AP1G2	ENSG00000213983.11	protein_coding	chr14	23559565	23568070	-		non-IFN			26.0558	24.9267	28.0534	25.0902	blue	turquoise	0.180437	0.289402	-0.108964	-2.10017	608.663	0.141634	0.107199	0.455211	0.118833	0.133298	-0.127301	N	N	N	N
AP1M1	ENSG00000072958.8	protein_coding	chr19	16197578	16245907	+		non-IFN			59.903	60.4713	58.0241	61.1598	blue	turquoise	0.280915	0.703344	-0.422429	1.0674	2085.91	-0.0699994	0.218205	0.621366	-0.0596732	0.120238	-0.100838	N	Y	N	N
AP1S1	ENSG00000106367.13	protein_coding	chr7	101154397	101161596	+		non-IFN			10.6452	10.4806	11.1488	10.317	lightyellow	turquoise	0.149075	0.0447229	0.104352	-0.8336	198.092	0.0908031	0.435258	0.797373	-0.00601377	-0.0218411	-0.124188	N	N	N	N
AP1S2	ENSG00000182287.13	protein_coding	chrX	15825806	15855014	-		non-IFN			274.336	274.192	273.819	274.893	tan	black	0.181662	0.0809726	0.100689	0.0857392	9528.84	-0.0197006	0.735198	0.929202	0.00836061	0.14253	-0.167947	N	N	N	N
AP2A1	ENSG00000196961.12	protein_coding	chr19	49766968	49807113	+		non-IFN			15.8583	16.0231	15.3773	16.1665	darkred	turquoise	0.194294	0.30223	-0.107935	0.828172	831.082	-0.0727694	0.395686	0.773762	-0.0914778	0.0767814	-0.222258	N	N	N	N
AP2A2	ENSG00000183020.13	protein_coding	chr11	924894	1012245	+	Nucleoplasm	non-IFN			5.80446	5.36011	6.02699	5.92178	greenyellow	turquoise	0.139056	0.106373	0.0326827	-0.207288	318.089	0.03233	0.743979	0.931148	-0.0412652	0.412503	-0.529786	N	N	N	N
AP2B1	ENSG00000006125.16	protein_coding	chr17	35578046	35726409	+		non-IFN			12.3714	11.3995	13.5415	12.0251	turquoise	yellow	0.0973456	0.061015	0.0363306	-1.10356	552.826	0.224764	0.0568677	0.327821	-0.0305333	0.0405298	-0.257369	N	N	N	N
AP2M1	ENSG00000161203.13	protein_coding	chr3	184174689	184184091	+		non-IFN			210.922	213.807	206.729	212.584	red	blue	0.221876	0.93706	-0.715184	0.718415	5622.83	-0.0447094	0.363632	0.751322	-0.256734	0.111457	-0.475476	N	Y	N	N
AP2S1	ENSG00000042753.11	protein_coding	chr19	46838136	46850992	-		non-IFN			354.036	349.285	372.847	340.793	lightyellow	black	0.297359	0.0818938	0.215465	-2.39456	1986.56	0.0935421	0.124951	0.486076	0.00432698	0.110781	-0.316869	N	N	N	N
AP3B1	ENSG00000132842.13	protein_coding	chr5	78000525	78294755	-	Golgi apparatus;Nucleoplasm	non-IFN			18.1892	17.6712	19.0434	17.801	black	blue	0.161487	0.247708	-0.0862214	-0.982018	1234.55	0.0854214	0.308651	0.709838	-0.167946	0.0180132	-0.39401	N	N	N	N
AP3D1	ENSG00000065000.15	protein_coding	chr19	2100988	2164465	-	Cytosol	non-IFN			8.6671	8.48976	8.3776	9.04771	black	red	0.319406	0.168242	0.151164	0.773508	693.631	-0.102831	0.459667	0.812096	-0.115411	0.0637218	-0.205826	N	N	N	N
AP3M1	ENSG00000185009.12	protein_coding	chr10	74120255	74151063	-		non-IFN			20.0097	20.6402	19.0446	20.4162	grey	grey60	0.146422	0.20442	-0.0579981	0.947784	942.058	-0.047004	0.64481	0.898331	-0.145822	-0.140954	-0.0864816	N	N	N	N
AP3M2	ENSG00000070718.11	protein_coding	chr8	42152946	42171673	+		non-IFN			1.76326	1.69524	1.49754	2.04573	grey	salmon	0.0727098	0.139526	-0.0668159	1.63809	68.4191	-0.301617	0.138857	0.510554	-0.156499	-0.0126149	-0.184725	N	N	N	N
AP3S1	ENSG00000177879.14	protein_coding	chr5	115841481	115914081	+	Vesicles	non-IFN			72.5825	72.3988	74.7083	70.8365	red	brown	0.363913	0.0646183	0.299295	-1.01034	1851.72	0.0491469	0.480392	0.824913	0.0426342	0.243179	-0.235922	N	Y	N	N
AP3S2	ENSG00000157823.16	protein_coding	chr15	89830599	89894638	-	Vesicles	non-IFN			11.9794	12.7887	11.57	11.7692	darkturquoise	turquoise	0.136877	0.1242	0.0126765	0.175738	179.71	-0.161698	0.166827	0.549171	-0.0845595	-0.0324238	-0.119345	N	N	N	N
AP4B1	ENSG00000134262.12	protein_coding	chr1	113894748	113905201	-	Vesicles	non-IFN			5.75944	6.23715	5.94449	5.25894	turquoise	turquoise	0.260667	0.128969	0.131697	-1.30764	175.309	0.116181	0.319306	0.717579	-0.00237128	0.0567417	-0.098935	N	N	N	N
AP4E1	ENSG00000081014.10	protein_coding	chr15	50908672	51005900	+		non-IFN			2.96024	2.75818	3.39083	2.72294	steelblue	grey	0.161746	0.0405829	0.121163	-2.27819	338.13	0.280804	0.0203247	0.175443	0.193296	0.272225	-0.0416841	N	N	N	N
AP4M1	ENSG00000221838.9	protein_coding	chr7	100101549	100110345	+		non-IFN			3.87926	3.80375	3.67112	4.1162	grey	turquoise	0.136947	0.062939	0.0740076	0.92108	92.9215	-0.150742	0.356671	0.745547	0.0138121	-0.100424	0.127474	N	N	N	N
AP4S1	ENSG00000100478.14	protein_coding	chr14	31025106	31096450	+		non-IFN			2.23435	2.04724	2.38349	2.23485	purple	turquoise	0.172055	0.0509956	0.121059	-0.616744	89.6596	0.0347456	0.751022	0.932809	0.0177969	0.0184636	0.0294037	N	N	N	N
AP5B1	ENSG00000254470.2	protein_coding	chr11	65775893	65780802	-	Golgi apparatus;Nucleus;Vesicles	non-IFN			17.8692	15.3742	21.6475	16.2965	saddlebrown	red	0.234626	0.341832	-0.107207	-4.47518	1464.59	0.385792	2.65492e-05	0.000999429	0.179069	0.223364	-0.227274	Y	N	N	N
AP5M1	ENSG00000053770.11	protein_coding	chr14	57268909	57298742	+		non-IFN			11.211	10.8278	12.0023	10.7831	grey	pink	0.208124	0.0918756	0.116249	-1.3353	539.758	0.126392	0.229372	0.634663	-0.226323	-0.285285	-0.388994	N	N	N	N
AP5S1	ENSG00000125843.10	protein_coding	chr20	3820524	3828837	+	Nucleoplasm	non-IFN			3.76965	3.81115	3.54947	3.93463	turquoise	turquoise	0.289289	0.0424682	0.24682	0.823442	110.759	-0.0949053	0.423004	0.793242	-0.129052	-0.104702	0.0747201	N	N	N	N
AP5Z1	ENSG00000242802.6	protein_coding	chr7	4775622	4794312	+		non-IFN			15.4053	15.0899	15.0622	15.9307	grey	turquoise	0.085118	0.339742	-0.254624	1.01186	716.498	-0.069484	0.36165	0.749826	-0.115606	-0.00810596	-0.177806	N	Y	N	N
APAF1	ENSG00000120868.13	protein_coding	chr12	98645141	98735433	+	Cytosol;Golgi apparatus;Nucleoplasm	IFN			22.486	22.5336	23.422	21.6265	blue	blue	0.118834	0.0843834	0.0344504	-0.988728	1027.68	0.0614781	0.523628	0.850439	0.00347136	-0.0477351	-0.128166	N	N	N	N
APBA3	ENSG00000011132.11	protein_coding	chr19	3750819	3761699	-	Vesicles	non-IFN			7.67932	7.65516	7.30918	8.02299	yellow	turquoise	0.124654	0.16133	-0.0366759	0.993132	230.03	-0.117312	0.353976	0.742823	-0.270815	-0.224265	-0.281065	N	N	N	N
APBB1	ENSG00000166313.18	protein_coding	chr11	6395124	6419414	-		non-IFN			0.74459	0.885559	0.555492	0.811934	green	grey60	0.0987984	0.0375612	0.0612372	1.53185	24.3277	-0.168945	0.395578	0.773762	-0.106707	-0.166762	0.0833515	N	N	N	N
APBB1IP	ENSG00000077420.15	protein_coding	chr10	26438203	26567803	+		non-IFN			48.2434	44.9116	51.4719	47.7465	blue	turquoise	0.215428	0.144227	0.071201	-1.81968	1816.75	0.124274	0.0321764	0.237452	0.0827505	0.0333245	-0.143905	N	N	N	N
APBB3	ENSG00000113108.18	protein_coding	chr5	140558268	140564781	-	Actin filaments	non-IFN			12.6443	12.7892	12.8851	12.3297	black	grey60	0.190976	0.116137	0.0748394	-0.512588	311.399	0.0833456	0.478679	0.824007	0.0585976	0.00180132	0.14183	N	N	N	N
APC	ENSG00000134982.16	protein_coding	chr5	112707498	112846239	+		non-IFN			1.82767	1.83458	1.81296	1.83577	blue	blue	0.135942	0.0926815	0.04326	0.123209	316.647	-0.010016	0.935078	0.985976	-0.184153	-0.136675	-0.202713	N	N	N	N
APCDD1	ENSG00000154856.12	protein_coding	chr18	10454628	10489948	+		non-IFN			1.15389	0.862142	1.06346	1.43962	grey	grey	0.0638065	0.0304335	0.0333731	1.15904	38.2571	-0.224825	0.241611	0.646248	-0.147069	0.125868	-0.30234	N	N	N	N
APEH	ENSG00000164062.12	protein_coding	chr3	49674002	49683963	+		non-IFN			35.9087	33.4536	35.2689	38.2063	pink	blue	0.158529	0.478821	-0.320291	1.35899	1388.93	-0.113518	0.180313	0.569605	-0.353492	-0.167523	-0.437424	N	Y	N	N
APEX1	ENSG00000100823.11	protein_coding	chr14	20455191	20457772	+		non-IFN			35.4238	40.6393	31.7839	34.9539	darkgrey	blue	0.246087	0.0718951	0.174192	1.61442	620.277	-0.148651	0.0702307	0.369491	-0.131667	-0.138702	-0.00432408	N	N	N	N
APEX2	ENSG00000169188.4	protein_coding	chrX	55000357	55009057	+		non-IFN			5.28196	5.07114	5.55963	5.18578	grey	turquoise	0.102503	0.0885546	0.0139481	-0.747489	274.471	0.0876966	0.465101	0.815033	0.0632424	0.116636	-0.0129722	N	N	N	N
APH1A	ENSG00000117362.12	protein_coding	chr1	150265399	150269580	-		non-IFN			15.9309	15.1117	16.3909	16.1033	lightgreen	blue	0.141483	0.107012	0.0344703	-0.263364	465.57	0.000637635	0.994067	0.998858	0.0881531	0.0873642	0.00103778	N	N	N	N
APH1B	ENSG00000138613.13	protein_coding	chr15	63276018	63309126	+		non-IFN			29.2609	26.6789	28.0889	32.1176	purple	red	0.22765	0.0280466	0.199604	1.91245	551.825	-0.212605	0.0221628	0.186524	-0.212853	0.0105828	-0.211707	N	N	N	N
API5	ENSG00000166181.12	protein_coding	chr11	43311963	43344529	+		non-IFN			30.8468	32.7818	28.8299	31.2606	red	blue	0.184631	0.488864	-0.304233	1.27816	1298.2	-0.0438372	0.587793	0.877259	-0.249009	-0.0936688	-0.272244	N	Y	N	N
API5P1	ENSG00000234558.1	processed_pseudogene	chrX	116106921	116108430	-		non-IFN			2.0471	2.18628	1.92703	2.0548	red	blue	0.159636	0.315629	-0.155993	0.847354	43.3795	-0.0758845	0.465639	0.815356	-0.224808	-0.0986225	-0.249932	N	N	N	N
APIP	ENSG00000149089.12	protein_coding	chr11	34853094	34916499	-	Cytosol;Nucleoplasm	non-IFN			21.807	21.9239	22.5314	21.0852	grey	grey	0.0736481	0.028526	0.0451221	-1.23745	415.628	0.0723852	0.367589	0.753569	-0.239915	-0.070702	-0.500556	N	N	N	N
APITD1-CORT	ENSG00000251503.8	protein_coding	chr1	10430102	10452153	+		non-IFN			0.803148	1.16967	0.404421	0.896246	grey	blue	0.0850694	0.0332687	0.0518008	3.06331	3.77083	-0.191531	0.343952	0.734901	-0.369501	-0.310741	-0.224408	N	N	N	N
APLF	ENSG00000169621.9	protein_coding	chr2	68467561	68655862	+		non-IFN			0.914102	0.939475	0.889891	0.917556	turquoise	grey	0.102317	0.0173794	0.0849375	0.165144	57.2085	-0.0150492	0.94067	0.987152	0.0583661	-0.0488609	0.240073	N	N	N	N
APLP2	ENSG00000084234.16	protein_coding	chr11	130069837	130144811	+	Vesicles	non-IFN			260.644	243.57	292.979	244.166	darkolivegreen	blue	0.430778	0.490835	-0.0600564	-3.99395	14252.2	0.244171	1.24743e-05	0.000501257	0.141764	0.246556	-0.252699	Y	N	N	N
APMAP	ENSG00000101474.11	protein_coding	chr20	24962925	24992979	-	Plasma membrane	non-IFN			49.0029	49.3759	47.2949	50.2466	grey	blue	0.0995675	0.3499	-0.250332	1.17102	1824.45	-0.0848738	0.243311	0.648149	-0.171759	-0.0603444	-0.19026	N	Y	N	N
APOA2	ENSG00000158874.11	protein_coding	chr1	161222292	161223631	-		non-IFN			2.07193	2.65658	2.11195	1.62391	grey	purple	0.106591	0.0201021	0.0864889	-0.871663	7.67323	0.156466	0.44626	0.804595	0.0314127	-0.0464566	0.0477592	N	N	N	N
APOBEC3A	ENSG00000128383.12	protein_coding	chr22	38952741	38992778	+		non-IFN			270.517	153.529	530.579	123.631	green	salmon	0.180523	0.0379222	0.142601	-7.51092	5954.42	1.68586	1.07581e-25	3.2516e-23	0.353468	0.323788	-0.0299226	Y	N	N	N
APOBEC3B	ENSG00000179750.15	protein_coding	chr22	38982347	38992804	+	Nucleoplasm	non-IFN			38.6132	21.6654	77.7864	16.0117	green	salmon	0.185025	0.0313083	0.153716	-6.81727	607.534	1.77884	1.4388e-28	5.17349e-26	0.338311	0.373099	-0.186108	Y	N	N	N
APOBEC3C	ENSG00000244509.3	protein_coding	chr22	39014083	39020352	+	Intermediate filaments	non-IFN			50.4166	47.4711	55.6939	47.8394	greenyellow	midnightblue	0.232367	0.0431699	0.189197	-3.68923	2184.79	0.190318	0.000681629	0.0147157	0.183151	0.366344	-0.184552	Y	N	N	N
APOBEC3D	ENSG00000243811.7	protein_coding	chr22	39014363	39033276	+		non-IFN			2.51037	2.21599	3.14122	2.16152	midnightblue	grey	0.107567	0.0295393	0.0780274	-3.17327	71.5193	0.380394	0.00499374	0.0663216	0.26331	0.0342252	0.270514	N	N	N	N
APOBEC3F	ENSG00000128394.16	protein_coding	chr22	39040604	39053910	+		non-IFN			5.76445	5.01701	7.50843	4.75325	darkmagenta	grey	0.090287	0.0360148	0.0542722	-5.36712	120.422	0.510419	3.41718e-06	0.000160147	0.29355	0.0562914	0.238516	Y	N	N	N
APOBEC3G	ENSG00000239713.7	protein_coding	chr22	39040961	39087743	+		non-IFN			39.6421	32.4119	56.5823	29.7985	green	grey	0.28572	0.021845	0.263875	-7.50267	839.741	0.843629	3.05284e-19	6.36671e-17	0.368356	0.271775	0.0408193	Y	Y	Y	Y
APOBR	ENSG00000184730.10	protein_coding	chr16	28494649	28498970	+		non-IFN			5.17289	4.63447	6.14534	4.69491	sienna3	black	0.238014	0.198615	0.0393983	-3.16963	289.003	0.284197	0.0210738	0.179744	0.285312	-0.0171126	0.315658	N	N	N	N
APOL1	ENSG00000100342.20	protein_coding	chr22	36253010	36267530	+		non-IFN			3.44966	2.58913	4.44997	3.17446	turquoise	grey	0.0946089	0.0185435	0.0760654	-2.70788	149.543	0.431865	0.00170784	0.0288245	0.211631	0.151987	0.0714338	Y	N	N	N
APOL2	ENSG00000128335.13	protein_coding	chr22	36226203	36239954	-	Cytosol;Nuclear bodies;Nucleoplasm	non-IFN			12.5514	10.886	15.6953	10.9531	greenyellow	blue	0.227076	0.0635207	0.163555	-4.561	517.726	0.473011	1.30381e-06	6.88379e-05	0.335133	0.363417	0.0913246	Y	N	N	N
APOL3	ENSG00000128284.19	protein_coding	chr22	36140330	36166177	-	Mitochondria;Nuclear bodies	non-IFN			20.9856	19.9248	24.2089	18.8904	midnightblue	pink	0.230018	0.110278	0.11974	-3.10884	668.261	0.337523	0.000823735	0.0169085	0.0504326	0.108079	-0.219663	Y	N	N	N
APOL4	ENSG00000100336.17	protein_coding	chr22	36189124	36204840	-	Vesicles	non-IFN			1.5261	1.35899	1.70568	1.48561	darkgreen	pink	0.151012	0.102776	0.0482363	-0.726127	80.226	0.1367	0.430503	0.795551	-0.115142	-0.236649	0.00536186	N	N	N	N
APOL6	ENSG00000221963.5	protein_coding	chr22	35648395	35668409	+	Cytosol	IFN			5.4649	3.88112	8.60191	3.8149	green	midnightblue	0.250958	0.0547755	0.196183	-7.32868	1007.37	1.05819	1.97133e-21	4.95326e-19	0.386177	0.272675	0.149267	Y	N	N	N
APOM	ENSG00000204444.10	protein_coding	chr6	31652416	31658210	+	Golgi apparatus	non-IFN	Breast Neoplasms	Neoplasms;Skin and Connective Tissue Diseases	6.08527	6.46638	6.28274	5.642	purple	blue	0.129128	0.0446224	0.0845051	-0.97431	34.8807	0.185233	0.300415	0.70268	0.0974182	0.353059	-0.250451	N	N	N	N
APOO	ENSG00000184831.13	protein_coding	chrX	23833353	23907934	-	Cytosol;Mitochondria	non-IFN			5.24935	5.29625	5.29125	5.17927	greenyellow	grey	0.111569	0.0312217	0.0803475	-0.168976	83.4055	-0.0192364	0.901397	0.977134	0.197843	0.299245	0.149094	N	N	N	N
APOOL	ENSG00000155008.13	protein_coding	chrX	85003826	85093316	+	Mitochondria	non-IFN			2.37171	2.27342	2.50752	2.32127	greenyellow	magenta	0.115223	0.0359176	0.0793059	-0.605589	187.284	-0.0744464	0.536608	0.856663	0.17814	0.344954	-0.0427219	N	N	N	N
APOPT1	ENSG00000256053.7	protein_coding	chr14	103562962	103607523	+		non-IFN			31.4547	33.5242	28.6806	32.4415	brown	lightgreen	0.297844	0.0394562	0.258387	1.94468	252.377	-0.218129	0.000560136	0.0127656	-0.0713585	0.282358	-0.114156	Y	Y	Y	Y
APP	ENSG00000142192.20	protein_coding	chr21	25880550	26171128	-	Golgi apparatus;Vesicles	non-IFN			6.7213	6.67848	6.70691	6.76421	brown	blue	0.105374	0.108498	-0.0031233	0.0920219	336.051	-0.036279	0.756592	0.934593	0.108883	0.402146	-0.0902868	N	N	N	N
APPBP2	ENSG00000062725.9	protein_coding	chr17	60443149	60526219	-		non-IFN			4.26416	4.55466	4.55603	3.80157	grey	turquoise	0.103181	0.116014	-0.012833	-2.07756	439.484	0.238746	0.0398958	0.267447	0.0370116	-0.0580927	-0.0665908	N	N	N	N
APPL1	ENSG00000157500.10	protein_coding	chr3	57227737	57273468	+		non-IFN			9.1599	8.83954	10.3434	8.34176	lightgreen	blue	0.307627	0.126485	0.181142	-3.09336	895.92	0.284923	0.000494336	0.011506	0.170268	0.208503	-0.047046	Y	N	N	N
APPL2	ENSG00000136044.11	protein_coding	chr12	105173296	105236238	-		non-IFN			5.46549	5.57411	4.82802	5.95128	brown	blue	0.249598	0.0785475	0.17105	2.05814	236.542	-0.313078	0.0193884	0.170681	-0.216056	0.0128344	-0.298016	N	N	N	N
APRT	ENSG00000198931.10	protein_coding	chr16	88809339	88811944	-	Nucleoplasm	non-IFN			312.072	323.62	292.627	321.079	black	grey	0.319815	0.040439	0.279376	2.3525	2665.19	-0.143698	0.025447	0.205061	-0.120031	-0.118437	0.101356	N	Y	N	N
APTR	ENSG00000214293.8	lincRNA	chr7	77657660	77696265	-		non-IFN			2.16478	2.42348	2.31259	1.85176	green	yellow	0.11733	0.0604372	0.0568923	-1.67573	40.0467	0.197222	0.250119	0.653909	-0.106463	-0.342252	-0.0408193	N	N	N	N
APTX	ENSG00000137074.18	protein_coding	chr9	32972606	33025168	-		non-IFN			13.8451	12.4362	16.2861	12.6859	turquoise	grey	0.168584	0.0348844	0.1337	-3.566	336.578	0.280094	0.00211612	0.0342903	0.181049	0.0828609	0.00121074	Y	N	N	N
AQP9	ENSG00000103569.9	protein_coding	chr15	58138169	58185911	+		non-IFN			45.1462	41.1929	50.2509	43.4327	yellow	blue	0.260959	0.0479596	0.212999	-1.42802	2146.24	0.194567	0.134799	0.503396	-0.0591354	0.0391788	-0.22295	N	N	N	N
AQR	ENSG00000021776.10	protein_coding	chr15	34851782	34969839	-		non-IFN			3.52631	3.57346	3.44294	3.56659	lightcyan	blue	0.110436	0.058863	0.0515729	0.484527	568.089	-0.0476261	0.633759	0.894621	0.0465701	0.0475099	0.0627856	N	N	N	N
ARAF	ENSG00000078061.12	protein_coding	chrX	47561100	47571920	+	Nucleoli fibrillar center;Nucleus	non-IFN			34.7219	33.9981	37.4071	32.8634	red	turquoise	0.200324	0.672098	-0.471774	-2.55787	1242.37	0.158278	0.0187405	0.16686	0.174913	0.347881	-0.285216	N	Y	N	N
ARAP1	ENSG00000186635.14	protein_coding	chr11	72685069	72793599	-	Cytosol;Nucleoplasm;Plasma membrane;Vesicles	non-IFN			53.749	52.2422	54.0908	54.5109	midnightblue	turquoise	0.318491	0.432113	-0.113622	0.133392	3152.42	-0.0335827	0.703713	0.918649	-0.094338	0.0481854	-0.185417	N	N	N	N
ARAP1-AS2	ENSG00000245148.2	antisense	chr11	72700474	72705607	+		non-IFN			2.57993	2.42391	2.49499	2.76499	midnightblue	turquoise	0.19164	0.397137	-0.205497	1.18521	7.6429	-0.360377	0.0798235	0.394653	-0.162103	-0.0457086	-0.0731634	N	N	N	N
ARAP2	ENSG00000047365.11	protein_coding	chr4	35948221	36244509	-	Actin filaments;Focal adhesion sites	non-IFN			6.04083	5.4546	7.31173	5.33326	pink	blue	0.203756	0.0986307	0.105126	-3.14153	766.885	0.413052	0.000677527	0.0146605	0.119542	0.19004	-0.191124	Y	N	N	N
ARAP3	ENSG00000120318.15	protein_coding	chr5	141653401	141682221	-		non-IFN			3.21622	3.28229	2.79956	3.53722	blue	turquoise	0.190145	0.156341	0.0338046	2.30624	253.102	-0.301748	0.0312513	0.2331	-0.264093	-0.19094	-0.281584	N	N	N	N
ARCN1	ENSG00000095139.13	protein_coding	chr11	118572390	118603033	+		non-IFN			28.3981	28.5853	28.5399	28.1409	grey	yellow	0.147871	0.274448	-0.126576	-0.220428	1314.7	0.0101023	0.911972	0.980825	-0.229941	-0.244305	-0.219836	N	N	N	N
AREG	ENSG00000109321.10	protein_coding	chr4	74445134	74455009	+	Mitochondria	non-IFN			3.91462	2.37362	2.46595	6.28063	grey60	greenyellow	0.155476	0.0747342	0.0807422	0.855467	39.049	0.100725	0.591357	0.878186	-0.0513302	-0.0206842	0.0171377	N	N	N	N
AREL1	ENSG00000119682.16	protein_coding	chr14	74653437	74713115	-		non-IFN			4.16538	4.18324	4.30805	4.02688	pink	blue	0.101208	0.200795	-0.0995869	-0.763553	369.975	0.0870265	0.43962	0.799815	-0.121498	0.0430066	-0.291962	N	N	N	N
ARF1	ENSG00000143761.14	protein_coding	chr1	228082660	228099212	+	Cytosol;Plasma membrane	non-IFN			348.689	337.696	358.839	347.492	saddlebrown	blue	0.345971	0.664842	-0.318871	-0.964373	9995.39	0.0367445	0.42153	0.792269	-0.0714074	0.295642	-0.466482	N	Y	N	N
ARF3	ENSG00000134287.9	protein_coding	chr12	48935723	48957551	-		non-IFN			44.9058	41.7605	45.984	46.1746	green	turquoise	0.352827	0.165814	0.187013	0.0764858	714.004	-0.193394	0.00152044	0.0264239	0.0287488	0.309152	-0.220874	Y	N	N	N
ARF4	ENSG00000168374.10	protein_coding	chr3	57571363	57598220	-		non-IFN			104.487	97.7147	110.287	104.151	paleturquoise	blue	0.36192	0.149171	0.212749	-1.42247	2564.64	0.0722684	0.178978	0.568569	-0.0550285	0.249258	-0.458007	N	N	N	N
ARF4-AS1	ENSG00000272146.5	antisense	chr3	57597715	57600927	+		non-IFN			1.38596	1.39744	1.07178	1.65507	cyan	grey	0.286237	0.019231	0.267006	2.24471	10.0334	-0.521958	0.00689833	0.0837884	-0.0927534	0.214678	-0.115021	N	Y	N	N
ARF4P1	ENSG00000271525.1	processed_pseudogene	chr9	134078904	134079444	+		non-IFN			0.919204	0.847744	0.947314	0.944842	paleturquoise	grey	0.140189	0.0376236	0.102565	-0.021674	5.3665	0.0030862	0.984718	0.996376	-0.0628757	0.225165	-0.275876	N	N	N	N
ARF5	ENSG00000004059.10	protein_coding	chr7	127588345	127591705	+		non-IFN			186.164	185.792	176.822	194.67	lightyellow	blue	0.164999	0.135423	0.0295765	3.09311	2839.34	-0.153431	0.000196135	0.00539629	-0.220163	0.0171126	-0.203405	Y	N	N	N
ARF6	ENSG00000165527.6	protein_coding	chr14	49893092	49897054	+		non-IFN			77.9537	71.1195	81.8713	79.3211	magenta	blue	0.125124	0.229348	-0.104224	-0.633447	4953.18	0.0346106	0.616292	0.888643	-0.127658	0.063947	-0.394529	N	N	N	N
ARFGAP1	ENSG00000101199.12	protein_coding	chr20	63272785	63289793	+		non-IFN			6.32101	6.02599	6.77403	6.12955	lightyellow	turquoise	0.189262	0.0911712	0.0980912	-1.25767	335.179	0.11957	0.24838	0.65172	-0.162983	-0.126093	-0.268785	N	N	N	N
ARFGAP2	ENSG00000149182.14	protein_coding	chr11	47164299	47177125	-		non-IFN			35.1881	33.6372	37.1421	34.5589	purple	turquoise	0.0828328	0.165426	-0.082593	-0.920171	1225.74	0.00628394	0.919463	0.982364	-0.127512	-0.122715	-0.274493	N	N	N	N
ARFGAP3	ENSG00000242247.10	protein_coding	chr22	42796502	42858106	-		non-IFN			20.7023	21.6749	19.5088	21.0687	darkgrey	blue	0.125134	0.0741873	0.0509465	1.15919	852.479	-0.0980799	0.284733	0.690157	-0.184056	-0.0351258	-0.173309	N	N	N	N
ARFGEF1	ENSG00000066777.8	protein_coding	chr8	67173511	67343677	-		non-IFN			3.72754	3.50409	3.87852	3.75204	cyan	blue	0.184961	0.0754717	0.10949	-0.371649	463.635	0.0398398	0.752527	0.933147	-0.167774	-0.153788	-0.227447	N	N	N	N
ARFGEF2	ENSG00000124198.8	protein_coding	chr20	48921890	49036693	+		non-IFN			2.07679	1.92369	2.08973	2.17343	lightyellow	blue	0.0706072	0.255942	-0.185335	0.457371	320.08	-0.0467277	0.676172	0.908388	-0.283332	-0.221338	-0.304415	N	N	N	N
ARFIP1	ENSG00000164144.15	protein_coding	chr4	152779937	152918463	+	Nucleus	non-IFN			13.4919	13.3716	14.1394	13.0055	green	yellow	0.223068	0.186885	0.0361831	-0.921313	580.046	0.161888	0.156362	0.53485	-0.128147	-0.0722781	-0.258234	N	N	N	N
ARFIP2	ENSG00000132254.12	protein_coding	chr11	6474683	6481479	-	Golgi apparatus;Nucleoli fibrillar center;Nucleus	non-IFN			20.2873	20.4759	20.631	19.8508	turquoise	blue	0.138113	0.195047	-0.0569342	-0.554464	498.326	0.0738242	0.408212	0.784343	-0.0644403	0.0815099	-0.259445	N	N	N	N
ARFRP1	ENSG00000101246.19	protein_coding	chr20	63698642	63708025	-		non-IFN	Crohn Disease	Digestive System Diseases	14.9122	15.5894	14.4169	14.8713	grey	turquoise	0.184537	0.0731476	0.11139	0.445667	351.726	-0.0716365	0.43296	0.796809	-0.0179924	0.109656	-0.133009	N	N	N	N
ARGLU1	ENSG00000134884.13	protein_coding	chr13	106541673	106568164	-		non-IFN			41.3738	42.849	39.7252	41.7872	lightgreen	brown	0.197581	0.0830472	0.114534	1.12214	1950.8	-0.0875203	0.133147	0.50077	-0.0657359	-0.0387285	0.0262904	N	N	N	N
ARHGAP1	ENSG00000175220.11	protein_coding	chr11	46677080	46700615	-		non-IFN			34.1566	34.3035	33.5286	34.6071	red	turquoise	0.294386	0.401569	-0.107183	0.671854	1814.42	-0.0557083	0.324427	0.721312	-0.110937	0.233046	-0.388648	N	N	N	N
ARHGAP10	ENSG00000071205.11	protein_coding	chr4	147732063	148072780	+	Cytosol;Nuclear membrane;Nucleoplasm	non-IFN			2.10368	1.99012	2.18183	2.11487	turquoise	salmon	0.260815	0.0208401	0.239975	-0.238277	113.812	0.0218005	0.888308	0.973441	0.0892532	-0.174728	0.350251	N	N	N	N
ARHGAP11B	ENSG00000187951.10	protein_coding	chr15	30624494	30772993	+	Vesicles	non-IFN			0.838888	0.831805	0.978812	0.720424	green	grey	0.0983592	0.0328077	0.0655515	-1.40444	16.7777	0.233002	0.23987	0.643489	0.24148	0.160768	0.277433	N	N	N	N
ARHGAP12	ENSG00000165322.17	protein_coding	chr10	31805404	31928876	-		non-IFN			2.96693	2.93864	2.76639	3.16386	brown	yellow	0.184257	0.0277447	0.156512	1.0097	205.264	-0.174068	0.273738	0.677729	-0.0347625	-0.00495364	0.000691853	N	N	N	N
ARHGAP15	ENSG00000075884.12	protein_coding	chr2	143091362	143768352	+		non-IFN			25.4513	25.0852	26.033	25.1965	grey	grey60	0.0988839	0.0702892	0.0285947	-0.576243	708.119	0.0251799	0.729936	0.926769	0.0723853	-0.00495364	0.0961675	N	N	N	N
ARHGAP17	ENSG00000140750.16	protein_coding	chr16	24919385	25015666	-		non-IFN			29.3543	25.8304	33.2271	28.4245	yellow	turquoise	0.410232	0.289078	0.121154	-2.11472	1577.97	0.216398	0.0227044	0.189628	0.120275	0.179232	-0.153245	N	N	N	N
ARHGAP18	ENSG00000146376.10	protein_coding	chr6	129576132	129710225	-	Cytosol;Nuclear speckles;Plasma membrane	non-IFN			3.77653	3.32427	4.53503	3.42651	green	grey60	0.131478	0.0323428	0.0991347	-2.5929	283.897	0.343905	0.00954564	0.105442	0.0202904	-0.0195894	-0.133701	N	N	N	N
ARHGAP19	ENSG00000213390.10	protein_coding	chr10	97222173	97292673	-		non-IFN			5.09976	5.19253	4.71887	5.37035	grey	turquoise	0.110023	0.164855	-0.0548326	1.12911	269.007	-0.143433	0.327604	0.722982	-0.257517	-0.105377	-0.365471	N	N	N	N
ARHGAP21	ENSG00000107863.17	protein_coding	chr10	24583609	24723668	-	Actin filaments	non-IFN			0.919359	0.900507	1.02355	0.84073	turquoise	grey	0.114828	0.0445047	0.0703233	-1.6169	95.3942	0.247215	0.144067	0.517513	0.184447	0.122265	0.112426	N	N	N	N
ARHGAP22	ENSG00000128805.14	protein_coding	chr10	48446034	48656265	-		non-IFN			1.52545	1.553	1.72116	1.33333	darkgreen	grey	0.207345	0.0247233	0.182621	-1.31964	62.8096	0.204023	0.286854	0.691525	-0.147729	-0.281907	-0.028366	N	N	N	N
ARHGAP24	ENSG00000138639.17	protein_coding	chr4	85475114	86002670	+	Cytosol;Plasma membrane	non-IFN			14.3601	14.7565	14.0137	14.3859	purple	greenyellow	0.149003	0.0217382	0.127265	0.264412	404.256	0.0104398	0.926317	0.983754	-0.122989	-0.269298	0.0835412	N	N	N	N
ARHGAP25	ENSG00000163219.11	protein_coding	chr2	68679601	68826833	+	Nucleoplasm;Vesicles	non-IFN			20.9536	21.9232	22.5904	18.8249	cyan	yellow	0.193865	0.129114	0.0647509	-2.14159	898.886	0.237905	0.0313447	0.233712	0.0783991	-0.0252185	0.0318252	N	N	N	N
ARHGAP26	ENSG00000145819.15	protein_coding	chr5	142770384	143229011	+	Cytosol	non-IFN			8.04467	7.63317	8.14483	8.24676	black	red	0.206014	0.135441	0.0705737	0.153805	1098.25	0.042725	0.683338	0.910582	-0.100914	0.0504371	-0.183687	N	N	N	N
ARHGAP26-IT1	ENSG00000230789.1	sense_intronic	chr5	143192500	143194166	+		non-IFN			7.08087	5.69486	7.38639	7.78965	cyan	green	0.0795138	0.0780241	0.0014897	0.344382	33.9011	-0.00640534	0.972974	0.994213	0.0379913	0.059894	0.0472229	N	N	N	N
ARHGAP27	ENSG00000159314.11	protein_coding	chr17	45393902	45434421	-		non-IFN			36.1211	35.0442	38.7596	34.5531	grey	turquoise	0.137294	0.375594	-0.2383	-1.8054	2021.95	0.143947	0.0971148	0.433018	-0.1192	-0.251285	-0.159299	N	N	N	N
ARHGAP29	ENSG00000137962.12	protein_coding	chr1	94148988	94275068	-	Centrosome;Cytosol;Nucleus;Plasma membrane	non-IFN			1.33733	1.11724	1.73987	1.13749	salmon	grey	0.128498	0.0501771	0.0783212	-1.6457	51.7667	0.229779	0.266198	0.671079	-0.0158111	-0.364931	0.231156	N	N	N	N
ARHGAP30	ENSG00000186517.13	protein_coding	chr1	161046946	161069970	-		non-IFN			49.8766	47.8847	51.792	49.5926	darkgrey	turquoise	0.13579	0.268215	-0.132425	-1.09075	3244.54	0.0520344	0.309321	0.710223	0.160343	0.0511126	0.184725	N	N	N	N
ARHGAP31	ENSG00000031081.10	protein_coding	chr3	119294373	119420714	+		non-IFN			3.41599	3.27602	3.5639	3.38427	grey	turquoise	0.0933141	0.061782	0.0315321	-0.678308	534.504	0.0684853	0.500778	0.838516	0.0486724	0.0319735	0.00207556	N	N	N	N
ARHGAP31-AS1	ENSG00000241155.1	antisense	chr3	119314293	119322760	-		non-IFN			1.17938	1.43788	1.05581	1.10594	cyan	pink	0.0956207	0.0295202	0.0661004	0.189404	10.4236	-0.0548329	0.790473	0.945169	-0.0290753	0.13156	-0.100835	N	N	N	N
ARHGAP35	ENSG00000160007.17	protein_coding	chr19	46918676	47005077	+		non-IFN			1.67996	1.7233	1.55427	1.76026	darkgreen	green	0.160287	0.0385968	0.12169	0.985428	146.087	-0.0653507	0.629495	0.893003	0.0884709	-0.105828	0.467865	N	N	N	N
ARHGAP4	ENSG00000089820.15	protein_coding	chrX	153907367	153934999	-	Focal adhesion sites	non-IFN			42.3463	42.539	41.9052	42.5994	turquoise	turquoise	0.264043	0.500244	-0.236201	0.401811	2168.3	-0.0237443	0.684665	0.910582	-0.104336	0.103126	-0.22295	N	N	N	N
ARHGAP45	ENSG00000180448.10	protein_coding	chr19	1065923	1086628	+		non-IFN			68.9033	65.3405	71.8405	68.8265	darkturquoise	turquoise	0.201635	0.770082	-0.568448	-0.982335	4314.89	0.0646303	0.308069	0.709789	-0.066127	0.0117086	-0.226409	N	Y	N	N
ARHGAP5	ENSG00000100852.12	protein_coding	chr14	32076114	32159728	+	Endoplasmic reticulum	non-IFN			1.79936	1.60066	1.96981	1.78922	turquoise	salmon	0.45584	0.0460492	0.409791	-0.589371	152.87	0.0265544	0.871063	0.968028	-0.00266464	-0.0774569	-0.0311334	N	Y	N	N
ARHGAP9	ENSG00000123329.17	protein_coding	chr12	57472255	57488814	-		non-IFN			76.2615	75.3889	77.6354	75.6652	turquoise	grey60	0.350734	0.245307	0.105427	-0.47531	2842.82	0.0268241	0.706744	0.919243	-0.0531217	-0.0335497	-0.0665908	N	N	N	N
ARHGDIA	ENSG00000141522.11	protein_coding	chr17	81867721	81871406	-		non-IFN			142.346	127.17	161.473	136.182	lightyellow	turquoise	0.225187	0.551223	-0.326036	-3.66885	1924.34	0.223919	0.000453037	0.0106397	0.157825	0.334371	-0.395394	Y	Y	Y	Y
ARHGDIB	ENSG00000111348.8	protein_coding	chr12	14942017	14961728	-		non-IFN			1217.81	1168.07	1256.61	1218.68	yellow	blue	0.253612	0.394436	-0.140824	-1.02756	21815.6	0.0316343	0.461262	0.812638	-0.193785	0.0157616	-0.550715	N	N	N	N
ARHGEF1	ENSG00000076928.17	protein_coding	chr19	41883161	41930150	+		non-IFN			48.2083	47.1919	50.4173	46.9767	darkolivegreen	turquoise	0.149857	0.608393	-0.458536	-1.72861	2526.31	0.100322	0.105595	0.451731	0.128025	0.178106	-0.106372	N	Y	N	N
ARHGEF10L	ENSG00000074964.16	protein_coding	chr1	17539835	17697874	+	Cytosol;Golgi apparatus;Vesicles	non-IFN			17.1615	17.3229	17.4467	16.7958	lightyellow	turquoise	0.256385	0.316042	-0.0596572	-0.455996	1004.36	0.0496884	0.649542	0.899461	-0.0400674	0.111457	-0.260829	N	N	N	N
ARHGEF11	ENSG00000132694.18	protein_coding	chr1	156934840	157045370	-	Golgi apparatus;Plasma membrane	non-IFN			0.84012	0.916759	0.886398	0.745188	greenyellow	turquoise	0.0733589	0.0488876	0.0244713	-1.16425	87.8981	0.138808	0.420545	0.791764	0.0209749	-0.0441324	0.0541375	N	N	N	N
ARHGEF18	ENSG00000104880.17	protein_coding	chr19	7395113	7472477	+		non-IFN			2.16739	2.01926	2.329	2.12935	tan	yellow	0.110871	0.0413558	0.069515	-0.869166	14.2341	0.195817	0.184301	0.573945	-0.0626801	-0.109656	-0.0882112	N	N	N	N
ARHGEF19	ENSG00000142632.16	protein_coding	chr1	16197854	16212609	-	Nuclear bodies	non-IFN			1.20861	1.1304	1.01649	1.43334	purple	blue	0.159486	0.0276446	0.131842	1.80488	48.6174	-0.317595	0.116891	0.472434	-0.04017	0.226769	-0.0818116	N	N	N	N
ARHGEF2	ENSG00000116584.17	protein_coding	chr1	155946851	156007070	-		non-IFN			14.583	14.2139	15.3464	14.17	blue	turquoise	0.346495	0.257233	0.0892618	-1.12975	948.962	0.0711123	0.436892	0.798264	-0.025913	-0.271775	0.0671097	N	N	N	N
ARHGEF26-AS1	ENSG00000243069.7	processed_transcript	chr3	154024401	154121332	-		non-IFN			1.21455	1.11486	1.31636	1.19508	lightgreen	green	0.191419	0.0884063	0.103013	-1.30703	44.2801	0.0644206	0.45761	0.811227	0.20217	0.21143	0.164142	N	N	N	N
ARHGEF3	ENSG00000163947.11	protein_coding	chr3	56727418	57079329	-	Cytosol	non-IFN			17.9547	15.7673	22.3919	15.5835	greenyellow	yellow	0.307783	0.0519996	0.255783	-3.31544	1000.86	0.459364	9.40006e-06	0.000390515	0.290128	0.240927	0.161029	Y	Y	Y	Y
ARHGEF39	ENSG00000137135.17	protein_coding	chr9	35658875	35675866	-		non-IFN			3.70754	3.48586	3.70608	3.8653	blue	turquoise	0.149602	0.0563679	0.0932342	0.674688	27.7476	0.0875648	0.583616	0.874899	-0.0811859	0.166397	-0.268266	N	N	N	N
ARHGEF40	ENSG00000165801.9	protein_coding	chr14	21070270	21090240	+		non-IFN	Heart Rate	Diagnostic Techniques and Procedures;Physical Examination	10.0803	9.59555	9.63686	10.8137	purple	turquoise	0.175124	0.221086	-0.0459617	1.85589	1016.73	-0.163322	0.036596	0.255582	-0.103554	-0.11506	0.0722986	N	N	N	N
ARHGEF6	ENSG00000129675.15	protein_coding	chrX	136665547	136782088	-	Cytosol	non-IFN			17.4942	18.4912	16.4369	17.7233	salmon	blue	0.227274	0.113032	0.114242	1.31203	1373.22	-0.116526	0.16246	0.54314	-0.112086	0.0630463	-0.0764497	N	N	N	N
ARHGEF7	ENSG00000102606.17	protein_coding	chr13	111114559	111305737	+		non-IFN			4.56427	4.46836	4.583	4.61543	grey	turquoise	0.0604188	0.115963	-0.0555444	0.0951501	370.889	-0.0158875	0.868804	0.967257	-0.0692073	0.0220662	-0.102048	N	N	N	N
ARHGEF9	ENSG00000131089.14	protein_coding	chrX	63634967	63809274	-		non-IFN			2.14488	2.03002	2.06467	2.29674	grey	grey	0.101393	0.0453842	0.0560087	0.761592	99.7965	-0.30133	0.0425596	0.277803	-0.0396518	0.141629	-0.1932	N	N	N	N
ARID1A	ENSG00000117713.18	protein_coding	chr1	26693236	26782104	+		non-IFN			6.05548	6.03639	5.96806	6.1461	cyan	turquoise	0.129846	0.0348594	0.0949866	0.490119	777.08	-0.0248999	0.751722	0.932968	-0.0911355	0.0141854	-0.163623	N	N	N	N
ARID1B	ENSG00000049618.22	protein_coding	chr6	156777374	157210779	+		non-IFN			1.88512	1.83526	1.93627	1.87519	turquoise	grey	0.215097	0.0313209	0.183776	-0.357909	289.467	0.0328273	0.771095	0.940059	-0.0923334	-0.0745298	-0.02802	N	N	N	N
ARID2	ENSG00000189079.15	protein_coding	chr12	45729665	45908040	+		non-IFN			4.29961	4.13175	4.4592	4.27729	pink	grey60	0.317294	0.0520573	0.265236	-0.483632	516.32	0.00520678	0.959962	0.991493	-0.112379	-0.123166	-0.0927083	N	Y	N	N
ARID3A	ENSG00000116017.10	protein_coding	chr19	925781	975934	+	Vesicles	non-IFN			2.93587	2.726	2.97943	3.04559	grey	red	0.108373	0.052269	0.0561043	0.290444	291.869	-0.0440237	0.670259	0.9076	0.0432454	0.0929934	-0.0032863	N	N	N	N
ARID3B	ENSG00000179361.17	protein_coding	chr15	74541177	74598131	+		non-IFN			4.11951	4.38446	3.76185	4.24807	red	blue	0.150838	0.0745169	0.076321	1.36715	275.916	-0.162162	0.164146	0.545448	-0.0554685	-0.00878145	-0.042376	N	N	N	N
ARID4A	ENSG00000032219.18	protein_coding	chr14	58298385	58373887	+	Cytosol;Plasma membrane	non-IFN			11.4469	11.8428	11.9985	10.6808	pink	blue	0.19307	0.1048	0.0882708	-1.42425	844.805	0.145434	0.140506	0.512232	-0.0233217	0.0148609	-0.180401	N	N	N	N
ARID4B	ENSG00000054267.20	protein_coding	chr1	235131634	235328219	-	Nucleoplasm;Vesicles	non-IFN			13.7987	13.2686	15.165	12.9674	yellowgreen	green	0.327088	0.114228	0.21286	-2.43854	1352.3	0.203271	0.0078702	0.0924373	0.17748	0.222464	-0.0596723	N	N	N	N
ARID5A	ENSG00000196843.15	protein_coding	chr2	96536743	96552638	+		non-IFN			15.9091	13.8953	18.1158	15.3834	grey	turquoise	0.0918461	0.0388593	0.0529868	-2.7588	608.176	0.17822	0.0186535	0.166479	0.0384784	-0.145682	0.0442786	N	N	N	N
ARID5B	ENSG00000150347.14	protein_coding	chr10	61901300	62096944	+	Cytosol;Endoplasmic reticulum;Nucleoplasm;Plasma membrane	non-IFN			1.28298	1.00385	1.91815	0.919558	yellow	tan	0.323824	0.0318934	0.29193	-3.21615	182.741	0.718486	0.000225422	0.00604264	0.179069	0.072053	0.0911516	Y	Y	Y	N
ARIH1	ENSG00000166233.13	protein_coding	chr15	72474326	72602985	+	Golgi apparatus	IFN			1.08496	0.985099	1.19153	1.06141	midnightblue	brown	0.2288	0.104721	0.124079	-1.42973	373.836	0.159553	0.154198	0.532347	-0.0349826	-0.0103576	-0.235749	N	N	N	N
ARIH2	ENSG00000177479.19	protein_coding	chr3	48918821	48986382	+		non-IFN	Menarche	Other	22.0368	21.4451	21.2746	23.1271	red	blue	0.182456	0.195295	-0.0128396	1.46633	899.686	-0.107449	0.15569	0.534228	-0.247909	-0.0522384	-0.327073	N	N	N	N
ARIH2OS	ENSG00000221883.2	protein_coding	chr3	48917788	48919385	-		non-IFN			2.20703	2.45989	1.95846	2.24787	turquoise	grey	0.376763	0.0177986	0.358964	0.953866	49.6859	-0.189282	0.250206	0.653964	-0.346256	-0.298119	-0.303032	N	Y	N	N
ARL1	ENSG00000120805.13	protein_coding	chr12	101393120	101407820	-		non-IFN			23.3813	24.6585	21.8962	23.7901	skyblue	turquoise	0.132304	0.0626165	0.0696877	0.998169	413.894	-0.170778	0.0636069	0.348351	0.0201192	0.0689006	0.101183	N	N	N	N
ARL11	ENSG00000152213.3	protein_coding	chr13	49628299	49633872	+		non-IFN			7.58873	7.76393	8.05225	7.05606	turquoise	yellow	0.472767	0.0521197	0.420647	-1.5177	456.962	0.155435	0.16147	0.54162	-0.0351537	-0.228768	0.0460082	N	Y	N	N
ARL13B	ENSG00000169379.15	protein_coding	chr3	93980139	94055668	+		non-IFN			2.0991	1.92352	2.36084	1.99209	turquoise	tan	0.306238	0.0306806	0.275558	-1.03448	85.2869	0.199579	0.274293	0.678131	0.18936	0.267271	0.0655531	N	Y	N	N
ARL14EP	ENSG00000152219.4	protein_coding	chr11	30323051	30338227	+	Focal adhesion sites;Vesicles	non-IFN			13.8509	14.8038	12.4959	14.374	yellow	midnightblue	0.120408	0.0498262	0.070582	2.51351	508.996	-0.217672	0.00479701	0.0646263	-0.133574	0.0236424	-0.119518	N	N	N	N
ARL15	ENSG00000185305.10	protein_coding	chr5	53883945	54310582	-	Cell Junctions;Golgi apparatus;Plasma membrane	non-IFN			5.51865	5.70003	5.42225	5.47567	grey	grey	0.0794928	0.0330245	0.0464683	0.0955461	73.8324	0.00642566	0.966437	0.993251	0.188456	0.280106	0.160683	N	N	N	N
ARL16	ENSG00000214087.8	protein_coding	chr17	81681174	81683924	-		non-IFN	Eye Color	Other	28.9048	29.3324	29.3377	28.2209	turquoise	turquoise	0.18996	0.140419	0.0495405	-0.471335	354.987	0.0300727	0.758645	0.935361	-0.0859774	-0.223364	0.0032863	N	N	N	N
ARL17A	ENSG00000185829.16	protein_coding	chr17	46516702	46579682	-		non-IFN	Alzheimer Disease	Mental Disorders;Nervous System Diseases	13.0749	13.2072	12.4381	13.5434	turquoise	turquoise	0.127176	0.0835592	0.0436167	0.913556	344.729	-0.0898298	0.503268	0.839878	0.0693539	0.0990728	0.122458	N	N	N	N
ARL17B	ENSG00000228696.8	protein_coding	chr17	46274784	46361797	-		non-IFN	Alzheimer Disease	Mental Disorders;Nervous System Diseases	12.2702	12.0358	12.4744	12.2555	grey	green	0.141952	0.0600311	0.0819208	-0.186297	98.5434	0.0144709	0.901689	0.977195	0.194348	0.143656	0.276049	N	N	N	N
ARL2	ENSG00000213465.7	protein_coding	chr11	65014113	65022184	+	Cytosol;Focal adhesion sites;Golgi apparatus;Nucleoli;Nucleus	non-IFN			33.1195	30.8078	36.7171	31.5769	lightyellow	turquoise	0.441904	0.0612821	0.380622	-1.87236	218.852	0.194011	0.0582803	0.331724	0.0862952	0.127219	-0.134392	N	Y	N	N
ARL2BP	ENSG00000102931.7	protein_coding	chr16	57245098	57253635	+		non-IFN			17.2515	18.671	15.4612	17.8292	grey	turquoise	0.139054	0.667158	-0.528104	2.26441	76.7636	-0.237552	0.0107611	0.115385	-0.394171	-0.140954	-0.412517	N	Y	N	N
ARL3	ENSG00000138175.8	protein_coding	chr10	102673731	102714407	-	Nucleus	non-IFN			4.01851	4.46204	3.27013	4.36577	tan	grey	0.115346	0.0196295	0.0957167	3.74518	238.202	-0.393723	0.00110401	0.021065	-0.268542	-0.157391	-0.247164	Y	N	N	N
ARL4A	ENSG00000122644.12	protein_coding	chr7	12686856	12690934	+		non-IFN			49.0986	37.0396	47.2032	59.2832	grey60	greenyellow	0.245682	0.129152	0.11653	0.889127	1131.01	-0.210095	0.255067	0.659349	-0.287488	-0.0869139	-0.37239	N	N	N	N
ARL4AP1	ENSG00000122872.8	processed_pseudogene	chr10	60684505	60685209	+		non-IFN			1.96304	1.60064	1.87737	2.29445	grey60	greenyellow	0.224694	0.121898	0.102796	0.751376	17.9079	-0.212501	0.271592	0.675982	-0.311347	-0.180358	-0.33503	N	N	N	N
ARL4AP2	ENSG00000248780.1	processed_pseudogene	chr4	40786110	40786710	+		non-IFN			14.381	11.6117	13.6865	16.9486	grey60	greenyellow	0.24258	0.129485	0.113096	0.826719	104.464	-0.233372	0.217122	0.62037	-0.281327	-0.059894	-0.42549	N	N	N	N
ARL4C	ENSG00000188042.7	protein_coding	chr2	234493041	234497053	-		non-IFN			1.22532	1.54666	1.00744	1.19074	greenyellow	purple	0.169793	0.0500661	0.119727	0.612408	59.7523	-0.15311	0.459354	0.812076	0.106196	0.129259	0.180747	N	N	N	N
ARL4D	ENSG00000175906.4	protein_coding	chr17	43398959	43401137	+	Golgi apparatus;Vesicles	non-IFN	Platelet Count	Diagnostic Techniques and Procedures	1.31509	1.41881	1.26848	1.28301	purple	grey	0.0942603	0.0279271	0.0663332	0.0542887	29.9698	-0.0159723	0.938478	0.986475	0.034039	0.00755145	0.151037	N	N	N	N
ARL5A	ENSG00000162980.16	protein_coding	chr2	151788984	151828492	-		non-IFN			108.261	105.128	104.649	113.66	red	brown	0.238988	0.158998	0.0799901	1.70865	1934.75	-0.0691914	0.251173	0.655048	-0.177773	0.134649	-0.371352	N	N	N	N
ARL5AP4	ENSG00000224806.2	processed_pseudogene	chr22	24686168	24686679	+		non-IFN			1.36308	1.32505	1.37682	1.37779	pink	brown	0.152257	0.0317551	0.120501	0.00700824	7.14426	-0.0204339	0.884557	0.972565	0.121718	0.281457	0.0147019	N	N	N	N
ARL5B	ENSG00000165997.4	protein_coding	chr10	18659405	18681639	+		non-IFN			1.70127	1.4591	2.08087	1.53728	lightgreen	magenta	0.198552	0.0514742	0.147077	-2.04607	212.239	0.336124	0.0458825	0.290875	0.133672	0.37355	-0.211534	N	N	N	N
ARL6IP1	ENSG00000170540.14	protein_coding	chr16	18791667	18801678	-	Endoplasmic reticulum	non-IFN			81.9898	78.9588	81.6856	84.3978	turquoise	blue	0.290958	0.490316	-0.199358	0.74473	1993.51	-0.0513961	0.454604	0.80925	-0.0766389	0.352384	-0.333992	N	N	N	N
ARL6IP1P2	ENSG00000225355.1	processed_pseudogene	chr10	36995023	36995585	+		non-IFN			2.58253	2.44786	2.59005	2.67095	cyan	turquoise	0.0871806	0.0468433	0.0403373	0.403807	15.9452	-0.0654339	0.552878	0.865251	-0.172541	-0.0378278	-0.263596	N	N	N	N
ARL6IP1P3	ENSG00000255014.1	processed_pseudogene	chr11	80653429	80653988	-		non-IFN			1.11485	1.24853	1.10046	1.03318	grey	turquoise	0.082734	0.0340997	0.0486343	-0.583198	6.4027	0.0375733	0.800401	0.948575	0.186989	0.190265	0.20548	N	N	N	N
ARL6IP5	ENSG00000144746.6	protein_coding	chr3	69084944	69106066	+	Endoplasmic reticulum	non-IFN			200.899	214.163	189.188	201.87	lightgreen	brown	0.196712	0.233234	-0.0365221	1.63044	6202.92	-0.108907	0.0265704	0.211015	-0.0401896	0.289788	-0.236614	N	N	N	N
ARL6IP6	ENSG00000177917.10	protein_coding	chr2	152717893	152761253	+	Cytosol;Nuclear membrane	non-IFN			11.9863	11.3613	12.5494	11.9306	white	blue	0.36936	0.186427	0.182932	-0.654866	534.177	0.0497174	0.590215	0.877985	-0.0715297	0.165497	-0.424279	N	N	N	N
ARL8A	ENSG00000143862.7	protein_coding	chr1	202133404	202144743	-		non-IFN			25.3751	23.4624	29.1639	23.3821	pink	turquoise	0.165045	0.115716	0.0493286	-4.27594	654.797	0.300067	2.36517e-05	0.000899158	0.204884	0.29902	-0.255467	Y	N	N	N
ARL8B	ENSG00000134108.12	protein_coding	chr3	5122220	5180912	+		non-IFN			45.1179	43.4953	45.1467	46.2379	red	turquoise	0.203124	0.164598	0.0385261	0.482341	1927.87	-0.0396628	0.548091	0.863181	-0.144526	0.0747549	-0.333473	N	N	N	N
ARMC1	ENSG00000104442.9	protein_coding	chr8	65602456	65634217	-		non-IFN			6.24325	6.49588	5.31559	6.88343	purple	yellow	0.103869	0.0728647	0.0310042	3.00483	293.268	-0.365134	0.00133705	0.0241004	-0.263457	-0.0995231	-0.273628	Y	N	N	N
ARMC10	ENSG00000170632.13	protein_coding	chr7	103074881	103099764	+		non-IFN			19.2065	20.5686	18.8138	18.5916	black	blue	0.22069	0.18474	0.0359499	-0.162769	729.394	0.00255575	0.979639	0.995224	-0.0860996	0.0355761	-0.240073	N	N	N	N
ARMC10P1	ENSG00000178660.6	processed_pseudogene	chr3	94506766	94507620	-		non-IFN			9.64198	10.0753	9.26213	9.6713	black	blue	0.288322	0.150582	0.13774	0.51183	103.236	-0.0670441	0.55105	0.864555	-0.111573	0.0797086	-0.245954	N	N	N	N
ARMC2	ENSG00000118690.12	protein_coding	chr6	108848416	108974472	+	Nucleus	non-IFN			1.00177	0.874238	1.00469	1.08922	turquoise	blue	0.327627	0.0433216	0.284305	0.530467	57.7886	-0.0957736	0.583949	0.875214	-0.027282	0.328291	-0.142349	N	Y	N	N
ARMC5	ENSG00000140691.16	protein_coding	chr16	31458080	31467166	+	Cytosol;Focal adhesion sites;Nucleoplasm	non-IFN			3.5418	3.53016	3.16411	3.88326	blue	turquoise	0.137712	0.112927	0.0247851	1.85774	173.261	-0.255094	0.0785501	0.391487	-0.203026	-0.0839867	-0.159299	N	N	N	N
ARMC6	ENSG00000105676.13	protein_coding	chr19	19033575	19060311	+		non-IFN			12.0428	11.9941	12.3545	11.8021	pink	blue	0.114657	0.11203	0.0026272	-0.617651	392.385	0.0659467	0.519192	0.848076	0.13179	0.0704768	0.133009	N	N	N	N
ARMC7	ENSG00000125449.6	protein_coding	chr17	75109952	75130265	+		non-IFN			9.39237	9.33007	9.38856	9.4397	blue	turquoise	0.181793	0.100009	0.0817835	0.0545331	250.797	-0.0459443	0.728408	0.926482	-0.114702	-0.128119	-0.174174	N	N	N	N
ARMC8	ENSG00000114098.17	protein_coding	chr3	138187248	138298389	+	Cytosol;Nucleoplasm;Vesicles	non-IFN			23.0052	22.2294	25.0664	21.7341	turquoise	blue	0.226115	0.231281	-0.00516585	-1.70022	1015.67	0.170598	0.0605792	0.339071	-0.0555907	0.0661987	-0.310469	N	N	N	N
ARMCX1	ENSG00000126947.12	protein_coding	chrX	101550531	101554700	+	Cytosol;Mitochondria;Nucleus	non-IFN			1.27336	1.3296	1.40351	1.11882	grey	midnightblue	0.10733	0.070066	0.0372643	-1.05534	40.7481	0.163286	0.429673	0.795103	0.0818616	-0.0855282	0.192484	N	N	N	N
ARMCX3	ENSG00000102401.19	protein_coding	chrX	101622797	101627843	+	Cytosol;Golgi apparatus;Nucleoplasm	non-IFN			9.53253	9.12086	10.5265	8.94613	turquoise	midnightblue	0.311165	0.0537419	0.257423	-1.67425	344.981	0.220068	0.055891	0.32441	-0.0887887	-0.25804	0.0292308	N	Y	N	N
ARMCX5	ENSG00000125962.14	protein_coding	chrX	102599168	102604159	+	Cytosol;Nuclear speckles	non-IFN			3.51782	3.71062	3.7381	3.18735	grey	blue	0.09686	0.0723511	0.0245089	-0.998026	135.258	0.169682	0.376404	0.761387	-0.129589	-0.117086	-0.25564	N	N	N	N
ARMCX5-GPRASP2	ENSG00000271147.7	processed_transcript	chrX	102599512	102714671	+		non-IFN			1.9045	2.07552	1.51465	2.12776	lightcyan	blue	0.110329	0.0401665	0.0701628	2.10492	41.1399	-0.378043	0.0557002	0.323936	-0.241113	-0.14996	-0.248548	N	N	N	N
ARMCX6	ENSG00000198960.10	protein_coding	chrX	101615118	101618001	-	Nuclear membrane;Nucleus	non-IFN			3.37845	3.53684	3.23723	3.39124	yellow	yellow	0.127534	0.0422074	0.0853268	0.435471	100.299	-0.0461051	0.738757	0.9298	-0.11546	-0.0643973	-0.204788	N	N	N	N
ARMCX7P	ENSG00000204072.3	transcribed_unprocessed_pseudogene	chrX	101597510	101598671	+		non-IFN			7.56826	8.10312	7.06643	7.63349	grey	pink	0.0975312	0.0353872	0.062144	0.714961	55.0534	-0.0999275	0.468846	0.817612	-0.0264508	0.106278	-0.202021	N	N	N	N
ARMT1	ENSG00000146476.10	protein_coding	chr6	151452258	151470101	+	Cytosol;Nuclear bodies;Nucleus	non-IFN			15.6059	16.6102	16.2071	14.3663	blue	yellow	0.266516	0.160104	0.106412	-1.24619	604.058	0.150989	0.222881	0.628439	-0.0735587	-0.135775	-0.172444	N	N	N	N
ARNT	ENSG00000143437.20	protein_coding	chr1	150809705	150876768	-		non-IFN	Adipose Tissue	Anatomy Category	22.7192	22.7748	21.4235	23.8231	red	turquoise	0.152297	0.486231	-0.333934	1.60292	1484.09	-0.130056	0.101631	0.444063	-0.191316	0.0209404	-0.266017	N	Y	N	N
ARNTL	ENSG00000133794.17	protein_coding	chr11	13276652	13387266	+		non-IFN	Menarche	Other	7.23281	6.95596	8.00387	6.74788	turquoise	grey60	0.105468	0.0824713	0.0229962	-1.56557	320.677	0.230888	0.103319	0.44677	0.0553952	-0.231695	0.119345	N	N	N	N
ARNTL2	ENSG00000029153.14	protein_coding	chr12	27332854	27425289	+		non-IFN			0.816277	0.640427	1.08799	0.700659	grey	grey	0.0671549	0.0185218	0.0486331	-1.99974	53.7025	0.437715	0.00663181	0.0811658	0.0914778	0.167523	-0.115712	N	N	N	N
ARPC1A	ENSG00000241685.8	protein_coding	chr7	99325898	99388164	+	Cell Junctions;Cytosol	non-IFN			50.7096	47.93	56.6345	47.4438	pink	blue	0.339382	0.109269	0.230112	-3.0387	1202.27	0.239672	0.00156335	0.0269674	-0.0101207	0.0855629	-0.370487	Y	N	N	N
ARPC1B	ENSG00000130429.12	protein_coding	chr7	99374249	99394801	+		non-IFN			738.882	713.577	764.99	733.707	red	turquoise	0.338167	0.661434	-0.323266	-1.17239	17078.8	0.0516045	0.252138	0.655817	-0.14548	-0.0236424	-0.397642	N	Y	N	N
ARPC2	ENSG00000163466.15	protein_coding	chr2	218217094	218254356	+		non-IFN	Crohn Disease	Digestive System Diseases	811.716	811.175	824.434	800.876	red	blue	0.28762	0.335738	-0.0481176	-1.19734	17844.8	0.0253761	0.442821	0.802628	-0.126094	0.133748	-0.426354	N	N	N	N
ARPC3	ENSG00000111229.15	protein_coding	chr12	110434825	110450422	-		non-IFN			859.077	859.776	884.678	835.994	yellow	blue	0.319734	0.0406358	0.279098	-2.12159	9880.83	0.0577193	0.226806	0.632799	-0.168483	-0.0950198	-0.492599	N	Y	N	N
ARPC3P1	ENSG00000226284.1	processed_pseudogene	chr20	49134480	49135012	+		non-IFN	Depressive Disorder	Mental Disorders	21.1068	20.5415	22.4251	20.3426	darkmagenta	blue	0.0795629	0.0370547	0.0425082	-2.95914	119.645	0.116226	0.0358429	0.252791	-0.0840217	-0.0716026	-0.486373	N	N	N	N
ARPC3P2	ENSG00000238137.2	processed_pseudogene	chr1	211442274	211442806	+		non-IFN			17.4119	17.1238	18.195	16.9244	yellow	blue	0.290229	0.0412187	0.24901	-1.85945	97.6484	0.0857589	0.164301	0.545591	-0.0520949	-0.00788079	-0.201502	N	N	N	N
ARPC3P5	ENSG00000214027.3	processed_pseudogene	chr6	15934782	15935315	+		non-IFN			6.94226	7.06577	7.01826	6.788	yellow	blue	0.148518	0.0440658	0.104452	-0.73138	38.4387	0.0286384	0.685171	0.910582	-0.0382583	0.0677748	-0.327073	N	N	N	N
ARPC4	ENSG00000241553.12	protein_coding	chr3	9792495	9807726	+		non-IFN			101.448	98.3954	101.935	103.174	grey	turquoise	0.0710421	0.0741052	-0.0030631	0.391288	2683.47	-0.0563068	0.253602	0.657913	-0.0855618	-0.0405298	-0.0297497	N	N	N	N
ARPC5	ENSG00000162704.15	protein_coding	chr1	183620846	183635757	-	Cell Junctions;Cytosol;Plasma membrane;Vesicles	non-IFN			485.247	467.195	506.708	479.055	red	yellow	0.370072	0.329101	0.0409704	-1.35703	12173.5	0.0805382	0.12305	0.482462	-0.0275998	0.123616	-0.313063	N	N	N	N
ARPC5L	ENSG00000136950.13	protein_coding	chr9	124862130	124877733	+		non-IFN			19.6748	20.2684	18.5444	20.2533	pink	lightgreen	0.389307	0.0289901	0.360317	1.05854	386.978	-0.125149	0.194439	0.58905	-0.041803	0.207377	-0.122458	N	Y	N	N
ARPIN	ENSG00000242498.7	protein_coding	chr15	89895006	89912956	-		non-IFN			2.11302	2.39719	1.89561	2.10425	brown	grey	0.170357	0.0270632	0.143294	0.696382	146.285	-0.0916893	0.55673	0.866779	-0.0348114	0.140503	-0.18386	N	N	N	N
ARPP19	ENSG00000128989.10	protein_coding	chr15	52547045	52569883	-		non-IFN			34.9135	35.4021	36.4848	33.1822	red	turquoise	0.205245	0.197075	0.00816964	-1.4304	1463.76	0.0720234	0.355169	0.74406	-0.0317801	0.0947947	-0.280546	N	N	N	N
ARRB1	ENSG00000137486.16	protein_coding	chr11	75264182	75351705	-		non-IFN			30.8386	28.88	33.1991	30.1385	lightyellow	pink	0.354125	0.329152	0.0249729	-1.2129	987.364	0.125573	0.203979	0.601308	-0.0955603	0.12992	-0.540337	N	N	N	N
ARRB2	ENSG00000141480.17	protein_coding	chr17	4710489	4721499	+		non-IFN			289.094	284.524	277.025	302.969	black	turquoise	0.290078	0.523949	-0.233871	2.2048	6841.5	-0.12199	0.00809344	0.0941289	-0.270889	-0.028596	-0.268785	N	N	N	N
ARRDC1	ENSG00000197070.13	protein_coding	chr9	137605654	137615360	+	Nucleoli;Nucleus	non-IFN			75.4312	71.8788	80.1899	73.74	darkturquoise	turquoise	0.193843	0.540996	-0.347153	-1.89013	1752.01	0.113142	0.0334803	0.243676	0.0314867	0.00180132	-0.153764	N	Y	N	N
ARRDC1-AS1	ENSG00000203993.4	antisense	chr9	137615332	137618906	-		non-IFN			6.89433	7.50861	6.26283	7.01792	darkgreen	turquoise	0.343586	0.0362983	0.307288	1.20941	140.422	-0.163707	0.144346	0.517513	-0.102185	-0.166622	0.114848	N	Y	N	N
ARRDC2	ENSG00000105643.9	protein_coding	chr19	18001132	18014102	+	Cytosol;Nucleoplasm	non-IFN			25.4253	26.8878	23.609	25.9956	black	red	0.2686	0.205518	0.0630816	1.04482	911.863	-0.109073	0.422761	0.793153	-0.145088	0.0709271	-0.155667	N	N	N	N
ARRDC3	ENSG00000113369.8	protein_coding	chr5	91368724	91383359	-		non-IFN			20.1836	19.9796	23.425	17.4675	lightgreen	lightyellow	0.135366	0.128499	0.00686767	-3.25687	1362.66	0.378138	0.00125348	0.0231543	0.147142	0.114159	-0.0126263	Y	N	N	N
ARRDC3-AS1	ENSG00000281357.2	lincRNA	chr5	91380349	91439085	+		non-IFN			1.2472	1.08443	1.40099	1.22641	turquoise	lightcyan	0.16322	0.0240336	0.139187	-1.04807	52.3127	0.129816	0.333017	0.727157	0.020706	-0.0567417	0.0793901	N	N	N	N
ARRDC4	ENSG00000140450.8	protein_coding	chr15	97960698	97973838	+		non-IFN			14.6345	16.7891	12.8183	14.716	orange	yellow	0.157829	0.138186	0.0196425	1.21915	895.529	-0.187107	0.163411	0.544507	-0.196865	0.194993	-0.413382	N	N	N	N
ARRDC5	ENSG00000205784.2	protein_coding	chr19	4890437	4902867	-		non-IFN			1.42439	1.34031	1.43162	1.47735	darkgreen	blue	0.215305	0.07542	0.139885	0.170321	35.745	-0.0159324	0.93571	0.986136	-0.104121	-0.12992	-0.0694505	N	N	N	N
ARSA	ENSG00000100299.17	protein_coding	chr22	50622754	50628173	-		non-IFN			29.2463	26.784	33.4267	27.2959	green	turquoise	0.170841	0.181989	-0.0111476	-2.85187	870.604	0.276668	0.00172038	0.028981	0.173837	0.323112	-0.0973783	Y	N	N	N
ARSB	ENSG00000113273.15	protein_coding	chr5	78777209	78986087	-	Golgi apparatus	non-IFN			10.3358	9.40864	11.4078	10.0444	turquoise	grey	0.252223	0.0375622	0.214661	-2.20161	854.258	0.181586	0.0174427	0.159351	0.0464234	0.232596	-0.277606	N	N	N	N
ARSD	ENSG00000006756.15	protein_coding	chrX	2903970	2929351	-	Lipid droplets;Vesicles	non-IFN			4.7721	4.91845	4.82549	4.62167	sienna3	grey	0.209741	0.0398767	0.169864	-0.553819	388.369	0.0497154	0.623738	0.8912	0.0723364	0.291139	-0.113291	N	N	N	N
ARSG	ENSG00000141337.12	protein_coding	chr17	68259182	68422731	+		non-IFN			7.70088	7.87931	6.9134	8.26976	greenyellow	blue	0.138213	0.142614	-0.0044012	1.95402	322.325	-0.203278	0.0560513	0.324708	-0.195056	0.0276954	-0.255121	N	N	N	N
ARSK	ENSG00000164291.16	protein_coding	chr5	95555074	95605064	+	Nucleus;Vesicles	non-IFN			1.97789	1.9267	1.97379	2.01764	turquoise	grey	0.43082	0.0329008	0.397919	0.197016	54.9573	-0.0368465	0.817636	0.953486	-0.230772	-0.249033	-0.293173	N	Y	N	N
ARV1	ENSG00000173409.13	protein_coding	chr1	230978981	231000595	+	Vesicles	non-IFN			7.70634	8.17465	7.93926	7.17026	tan	yellow	0.126945	0.0449173	0.0820277	-0.948369	143.553	0.114191	0.413882	0.788338	-0.118246	-0.314556	-0.084406	N	N	N	N
ASAH1	ENSG00000104763.18	protein_coding	chr8	18055992	18084998	-		non-IFN			579.086	584.034	570.355	583.298	lightgreen	brown	0.418573	0.413647	0.00492568	0.445791	14078.7	-0.0746952	0.230834	0.635769	-0.0332958	0.145007	0.0373601	N	N	N	N
ASAP1	ENSG00000153317.14	protein_coding	chr8	130052104	130443660	-	Centrosome;Cytosol;Plasma membrane	non-IFN			5.99735	5.45808	6.02728	6.3516	yellow	red	0.0952219	0.0754379	0.019784	0.69617	638.011	-0.0511017	0.600874	0.881921	-0.00926512	0.420159	-0.291443	N	N	N	N
ASAP1-IT2	ENSG00000280543.1	sense_intronic	chr8	130082738	130084768	-		non-IFN			2.16546	2.21211	2.46638	1.86702	black	grey	0.0856703	0.0192182	0.0664521	-1.55872	66.4727	0.27603	0.144262	0.517513	0.156431	0.102901	0.124015	N	N	N	N
ASB1	ENSG00000065802.11	protein_coding	chr2	238426742	238452250	+	Nucleoplasm	non-IFN			6.44544	5.63642	7.55066	6.04134	yellow	blue	0.144137	0.0632041	0.080933	-1.94171	167.218	0.211053	0.184319	0.573945	-0.0560063	0.0490861	-0.354402	N	N	N	N
ASB13	ENSG00000196372.12	protein_coding	chr10	5638867	5666595	-	Golgi apparatus;Nucleus	non-IFN			12.079	13.9431	9.91598	12.6718	orange	turquoise	0.134207	0.0776175	0.0565899	3.21157	477.616	-0.339361	0.00128279	0.0234218	-0.259008	-0.0810596	-0.157915	Y	N	N	N
ASB16-AS1	ENSG00000267080.5	antisense	chr17	44175973	44186717	-		non-IFN	Bone Density	Other	6.32776	6.13258	6.00374	6.75141	cyan	grey	0.230335	0.0235692	0.206766	1.34201	175.828	-0.185436	0.0950288	0.428173	-0.13091	0.21751	-0.294037	N	N	N	N
ASB3	ENSG00000115239.21	protein_coding	chr2	53532672	53787610	-		non-IFN			5.49294	5.0399	5.20525	6.06658	salmon	yellow	0.13166	0.0740567	0.0576033	1.33263	15.0238	-0.334021	0.0347431	0.24848	-0.158289	0.119563	-0.256677	N	N	N	N
ASB6	ENSG00000148331.11	protein_coding	chr9	129634604	129642169	-		non-IFN			8.48953	8.3839	8.82467	8.26837	tan	turquoise	0.133483	0.143071	-0.00958804	-0.912473	328.127	0.0725788	0.46973	0.817988	0.166674	0.0391788	0.248894	N	N	N	N
ASB7	ENSG00000183475.12	protein_coding	chr15	100602534	100651705	+	Golgi apparatus;Nucleus;Vesicles	non-IFN			4.45004	4.51146	4.27958	4.5571	turquoise	turquoise	0.141003	0.0795516	0.0614514	0.601125	225.184	-0.0500561	0.748986	0.932443	-0.0595755	0.0351258	-0.149959	N	N	N	N
ASB8	ENSG00000177981.10	protein_coding	chr12	48147788	48181213	-		non-IFN			32.9384	33.9903	31.3179	33.6259	pink	blue	0.109236	0.08389	0.0253464	0.983531	598.852	-0.0442698	0.587938	0.877259	-0.0705274	0.143881	-0.115885	N	N	N	N
ASB9	ENSG00000102048.15	protein_coding	chrX	15235288	15270467	-		non-IFN			0.568193	0.617861	0.541049	0.557084	grey	grey	0.0630777	0.0287113	0.0343665	0.083559	13.4443	-0.00195481	0.99078	0.998151	-0.124054	-0.0307957	-0.164105	N	N	N	N
ASCC1	ENSG00000138303.17	protein_coding	chr10	72096032	72217134	-	Cytosol;Nucleoplasm	non-IFN			7.20753	6.73959	7.43619	7.33607	grey	turquoise	0.0862546	0.0469812	0.0392734	-0.147817	223.881	-0.0201822	0.87333	0.969165	-0.166797	-0.245205	-0.147711	N	N	N	N
ASCC2	ENSG00000100325.14	protein_coding	chr22	29788608	29838304	-	Cytosol;Focal adhesion sites;Nucleus	non-IFN			28.1577	29.7095	28.0635	27.1454	grey	turquoise	0.212002	0.321456	-0.109455	-0.618862	1218.04	0.0379128	0.57521	0.873315	-0.149562	-0.154464	-0.263942	N	N	N	N
ASCC3	ENSG00000112249.13	protein_coding	chr6	100508194	100881372	-	Golgi apparatus	non-IFN			4.87947	5.03388	5.27855	4.41834	tan	grey	0.118536	0.0205841	0.0979523	-2.20505	372.869	0.337679	0.0016972	0.0287065	0.120764	-0.0866887	0.0771416	Y	N	N	N
ASCL2	ENSG00000183734.4	protein_coding	chr11	2268495	2270952	-		non-IFN			7.69251	7.18161	8.57517	7.27434	turquoise	turquoise	0.340517	0.0591682	0.281349	-1.98765	219.736	0.190603	0.0910272	0.420641	0.0509704	0.0254437	-0.184206	N	Y	N	N
ASF1A	ENSG00000111875.7	protein_coding	chr6	118894220	118909167	+		non-IFN	Attention Deficit Disorder with Hyperactivity	Mental Disorders	8.36896	8.30752	8.19467	8.56612	grey	yellow	0.097144	0.0922235	0.00492046	0.435853	308.789	-0.062774	0.639896	0.896834	-0.19491	-0.266371	-0.168466	N	N	N	N
ASF1B	ENSG00000105011.8	protein_coding	chr19	14119509	14136956	-		non-IFN			3.72232	4.10389	3.09429	4.00713	grey	turquoise	0.147446	0.0703211	0.0771252	1.44704	90.5071	-0.298447	0.120352	0.478467	-0.243976	-0.207288	-0.169504	N	N	N	N
ASGR1	ENSG00000141505.11	protein_coding	chr17	7173431	7179564	-	Cell Junctions	non-IFN			45.2999	45.6184	43.4142	46.739	blue	yellow	0.310319	0.101087	0.209232	1.18211	734.684	-0.125693	0.143508	0.516247	-0.2472	-0.151987	-0.227966	N	N	N	N
ASGR2	ENSG00000161944.16	protein_coding	chr17	7101322	7115700	-	Endoplasmic reticulum	non-IFN			73.5567	62.1324	77.2853	78.3308	yellow	blue	0.107673	0.0487134	0.0589592	0.134703	1529.29	-0.00566572	0.961879	0.992185	-0.0613111	0.161444	-0.197351	N	N	N	N
ASH1L	ENSG00000116539.11	protein_coding	chr1	155335268	155562807	-	Golgi apparatus	non-IFN			16.2402	16.2444	15.8793	16.5556	saddlebrown	green	0.120763	0.116572	0.00419076	0.576649	854.17	-0.046666	0.545096	0.861479	-0.0875419	-0.196569	0.0302686	N	N	N	N
ASH1L-AS1	ENSG00000235919.4	antisense	chr1	155562042	155563944	+		non-IFN			2.66363	2.69839	2.7482	2.56447	turquoise	grey	0.0966538	0.0316696	0.0649843	-0.613651	29.9095	0.0824368	0.623326	0.8912	0.232704	0.174503	0.262558	N	N	N	N
ASH2L	ENSG00000129691.15	protein_coding	chr8	38105242	38144076	+		non-IFN			24.2884	23.1591	26.0621	23.5206	grey	blue	0.221109	0.241098	-0.0199893	-1.49127	1005.04	0.11984	0.222305	0.627441	-0.0934579	0.0186887	-0.339873	N	N	N	N
ASL	ENSG00000126522.16	protein_coding	chr7	66075798	66093558	+	Cytosol	non-IFN			23.9146	22.9495	25.2153	23.4481	red	turquoise	0.414683	0.0662169	0.348466	-1.4297	381.145	0.0839554	0.164488	0.54598	-0.0332958	0.131722	-0.344197	N	Y	N	N
ASMTL	ENSG00000169093.15	protein_coding	chrX	1403139	1453762	-		non-IFN			4.42052	4.58143	4.01842	4.66174	turquoise	turquoise	0.16862	0.0415725	0.127047	1.84442	244.501	-0.200692	0.0673591	0.360106	-0.21938	-0.0616953	-0.237997	N	N	N	N
ASNA1	ENSG00000198356.11	protein_coding	chr19	12737139	12748323	+		non-IFN			32.9401	30.8686	32.4265	34.8555	turquoise	blue	0.165986	0.0969403	0.0690458	1.66325	592.853	-0.115015	0.0667707	0.357786	-0.292524	-0.103576	-0.391935	N	N	N	N
ASNS	ENSG00000070669.16	protein_coding	chr7	97852118	97872542	-		non-IFN			0.849264	1.03749	0.882733	0.686867	grey	grey	0.0764261	0.0191633	0.0572628	-0.895447	22.5185	0.11912	0.539939	0.85845	0.0865374	-0.0116399	0.239721	N	N	N	N
ASNSD1	ENSG00000138381.9	protein_coding	chr2	189661385	189670831	+	Cytosol	non-IFN	Ferritins	Chemicals and Drugs Category	19.4685	19.796	19.1305	19.5356	blue	greenyellow	0.18025	0.100589	0.0796609	0.236996	450.257	-0.00362761	0.97389	0.994213	-0.175866	-0.112808	-0.198735	N	N	N	N
ASPH	ENSG00000198363.16	protein_coding	chr8	61500556	61714640	-		non-IFN			9.8869	8.79474	10.9476	9.72191	pink	greenyellow	0.184402	0.0759137	0.108488	-0.804538	264.186	0.128098	0.453599	0.80919	-0.162836	-0.160993	-0.227274	N	N	N	N
ASPHD2	ENSG00000128203.6	protein_coding	chr22	26429273	26445015	+		non-IFN			2.28127	2.22271	2.30649	2.30034	purple	red	0.168743	0.149847	0.0188959	-0.0137741	121.726	-0.00393155	0.983077	0.995317	-0.13201	0.142079	-0.23817	N	N	N	N
ASPSCR1	ENSG00000169696.15	protein_coding	chr17	81976807	82017406	+		non-IFN			12.3912	12.7812	12.4931	12.0259	grey	turquoise	0.105167	0.0809711	0.0241957	-0.489682	326.567	0.0461873	0.6498	0.89948	-0.0692317	-0.121589	-0.0968594	N	N	N	N
ASRGL1	ENSG00000162174.12	protein_coding	chr11	62337448	62393412	+	Microtubules;Nucleoplasm	non-IFN	Uteroglobin	Chemicals and Drugs Category	40.4004	42.4599	38.3313	40.7722	turquoise	yellow	0.120214	0.0534541	0.0667603	0.870945	499.122	-0.110949	0.233348	0.638066	-0.133403	-0.22449	-0.00812927	N	N	N	N
ASS1P2	ENSG00000223922.1	processed_pseudogene	chr2	38810432	38811654	-		non-IFN			0.7327	0.62997	0.628657	0.897018	grey	grey	0.101613	0.0255369	0.0760756	1.14371	13.3279	-0.162816	0.398136	0.775704	-0.214404	-0.281683	-0.0958046	N	N	N	N
ASTE1	ENSG00000034533.11	protein_coding	chr3	131013875	131027649	-	Endoplasmic reticulum	non-IFN			5.08982	5.17848	5.2558	4.88078	white	purple	0.12785	0.049324	0.078526	-0.674456	187.581	0.0807882	0.538428	0.857431	-0.00415586	-0.0421059	0.0608831	N	N	N	N
ASTN2	ENSG00000148219.16	protein_coding	chr9	116425225	117415070	-	Cytosol;Nucleoplasm	non-IFN			2.40291	2.2935	2.51522	2.38105	lightcyan	green	0.196616	0.161222	0.0353944	-0.913272	131.511	0.0612048	0.447669	0.805269	0.049797	-0.283709	0.238862	N	N	N	N
ASUN	ENSG00000064102.14	protein_coding	chr12	26905181	26938326	-		non-IFN			3.16301	3.04582	3.73189	2.74378	darkorange	pink	0.154609	0.0576449	0.0969645	-2.16195	151.117	0.343359	0.0315475	0.234434	0.129027	0.00765563	0.125052	N	N	N	N
ASXL1	ENSG00000171456.16	protein_coding	chr20	32358344	32439319	+	Nucleoli;Nucleus	non-IFN			3.23524	3.05651	3.552	3.0819	grey	red	0.0927253	0.0923296	0.000395663	-1.27965	188.426	0.0621369	0.654138	0.901376	0.00657604	0.073404	-0.144943	N	N	N	N
ASXL2	ENSG00000143970.16	protein_coding	chr2	25733753	25878516	-		non-IFN			1.67581	1.66781	1.53083	1.80938	black	yellow	0.0918626	0.0773497	0.0145129	1.59387	261.843	-0.148717	0.264976	0.669562	-0.106292	-0.0900662	-0.0413382	N	N	N	N
ATAD1	ENSG00000138138.13	protein_coding	chr10	87751512	87841343	-	Mitochondria;Nucleoli;Nucleus	non-IFN			6.7746	7.29574	6.72443	6.45101	cyan	turquoise	0.247661	0.201901	0.0457595	-0.362444	333.956	0.0262951	0.836028	0.958145	-0.0199481	0.0740794	-0.147711	N	N	N	N
ATAD2	ENSG00000156802.12	protein_coding	chr8	123319850	123416350	-		non-IFN			0.945118	0.931615	0.766902	1.1119	midnightblue	yellow	0.11261	0.0398482	0.0727619	2.61401	87.6201	-0.381567	0.0399105	0.267459	-0.269104	-0.0434569	-0.292308	N	N	N	N
ATAD2B	ENSG00000119778.14	protein_coding	chr2	23748664	23927114	-		non-IFN			4.46784	4.43999	4.52569	4.43646	grey	turquoise	0.130248	0.0727702	0.0574775	-0.276399	614.636	0.0198675	0.832799	0.957082	-0.0718719	-0.213007	0.0396086	N	N	N	N
ATAD3A	ENSG00000197785.13	protein_coding	chr1	1512151	1534687	+		non-IFN			4.66015	4.36689	4.82942	4.7178	black	turquoise	0.17389	0.158326	0.0155637	-0.269326	183.483	0.027163	0.813821	0.953102	-0.159781	-0.0198146	-0.34437	N	N	N	N
ATAD3B	ENSG00000160072.19	protein_coding	chr1	1471769	1497848	+		non-IFN			3.17708	2.92553	3.34416	3.20723	grey	salmon	0.152099	0.127672	0.024427	-0.424866	124.028	0.0536679	0.664404	0.905406	0.0051826	0.111007	-0.19787	N	N	N	N
ATAT1	ENSG00000137343.17	protein_coding	chr6	30626842	30646823	+	Cytosol;Golgi apparatus	non-IFN			2.96087	3.25754	2.66899	3.00899	turquoise	grey	0.0932212	0.0200152	0.073206	0.888262	79.4189	-0.0886798	0.606298	0.884578	-0.00933846	-0.16392	0.293519	N	N	N	N
ATE1	ENSG00000107669.17	protein_coding	chr10	121740421	121928801	-		non-IFN			4.95187	5.10662	4.77674	4.99716	red	blue	0.247584	0.0865567	0.161027	0.491321	390.312	-0.0783272	0.527056	0.851547	-0.114628	0.215483	-0.383632	N	N	N	N
ATF1	ENSG00000123268.8	protein_coding	chr12	50763710	50821122	+		non-IFN			9.20828	10.1607	9.01551	8.70606	grey	grey	0.13691	0.0395444	0.0973655	-0.438522	299.307	0.028467	0.772565	0.940285	0.119151	0.0668742	0.0505053	N	N	N	N
ATF2	ENSG00000115966.16	protein_coding	chr2	175072250	175168382	-		IFN			10.5599	11.2197	9.89377	10.6818	grey	blue	0.155911	0.0867237	0.0691876	0.782359	484.014	-0.0350019	0.766283	0.938668	-0.061849	0.138026	-0.110351	N	N	N	N
ATF3	ENSG00000162772.16	protein_coding	chr1	212565334	212620777	+		IFN			4.98737	4.16107	5.93034	4.73862	turquoise	magenta	0.0958172	0.164155	-0.0683377	-0.688694	122.608	0.154229	0.455161	0.809339	0.120935	0.0468344	-0.0304415	N	N	N	N
ATF4	ENSG00000128272.14	protein_coding	chr22	39519695	39522685	+		non-IFN			35.649	32.2276	36.5673	37.2537	steelblue	lightgreen	0.246654	0.0568296	0.189824	0.306074	795.336	-0.0475567	0.588229	0.877259	0.0287243	0.00810596	0.028366	N	N	N	N
ATF4P3	ENSG00000228218.1	processed_pseudogene	chr17	76225751	76226806	-		non-IFN			6.40264	5.75506	6.45446	6.81404	pink	turquoise	0.239984	0.11931	0.120674	0.826683	96.0884	-0.101488	0.298291	0.70091	0.147435	0.179682	0.181438	N	N	N	N
ATF4P4	ENSG00000256167.1	transcribed_processed_pseudogene	chr11	113789231	113791366	+		non-IFN			3.58545	3.12934	3.5691	3.92183	black	yellow	0.225854	0.0458405	0.180013	1.40928	61.7577	-0.143165	0.136719	0.506263	-0.077299	0.0691258	-0.105335	N	N	N	N
ATF5	ENSG00000169136.9	protein_coding	chr19	49928702	49933935	+		non-IFN			10.3649	8.86324	12.6142	9.44028	lightyellow	red	0.225978	0.0593269	0.166651	-3.72779	167.028	0.52819	3.63084e-06	0.000168644	0.291399	0.14906	0.165526	Y	N	N	N
ATF6	ENSG00000118217.5	protein_coding	chr1	161766294	161964070	+	Cytosol	non-IFN	Inflammatory Bowel Diseases	Digestive System Diseases	8.87318	8.81066	9.04602	8.76481	green	blue	0.182304	0.111105	0.071199	-0.629151	1096.13	0.0353925	0.599201	0.881147	-0.130983	-0.0475099	-0.237478	N	N	N	N
ATF6B	ENSG00000213676.10	protein_coding	chr6	32098176	32128253	-		non-IFN	Body Height	Body Weights and Measures;Diagnostic Techniques and Procedures;Physical Examination	14.6833	13.9609	14.8827	15.0172	red	blue	0.213849	0.101285	0.112563	0.134471	634.823	-0.0277762	0.729179	0.926692	-0.0308756	0.0378278	0.00812927	N	N	N	N
ATF7	ENSG00000170653.18	protein_coding	chr12	53507856	53626410	-	Cytosol;Nucleus	non-IFN			16.4599	15.4242	18.1152	15.7305	skyblue	blue	0.102503	0.067744	0.0347591	-2.25274	244.654	-0.0670513	0.536297	0.856663	0.0823104	-0.0470596	0.0205826	N	N	N	N
ATF7IP	ENSG00000171681.12	protein_coding	chr12	14365632	14502935	+		non-IFN			19.8645	19.8092	18.7038	20.9277	grey	blue	0.097784	0.0849439	0.0128401	1.65045	1483.79	-0.121698	0.159765	0.539642	0.0209015	0.138477	0.128339	N	N	N	N
ATG10	ENSG00000152348.15	protein_coding	chr5	81972025	82276857	+	Nucleoli;Nucleus	non-IFN			8.27411	8.94732	7.20944	8.73831	grey60	magenta	0.0984982	0.0207065	0.0777917	1.8221	129.51	-0.20129	0.127408	0.491075	-0.244096	-0.252411	-0.0555212	N	N	N	N
ATG101	ENSG00000123395.14	protein_coding	chr12	52069246	52077494	+		non-IFN			8.5411	8.68097	8.20536	8.73861	darkred	turquoise	0.157017	0.140318	0.0166994	0.792722	159.214	-0.0825905	0.445002	0.803544	-0.173202	-0.301046	0.0105508	N	N	N	N
ATG10-IT1	ENSG00000236447.2	sense_intronic	chr5	81991995	81992481	+		non-IFN			1.32572	1.21037	1.48046	1.27061	greenyellow	grey	0.0831356	0.0392266	0.043909	-1.31208	6.54265	0.17285	0.255219	0.659554	0.0114653	0.0839867	-0.119691	N	N	N	N
ATG12	ENSG00000145782.12	protein_coding	chr5	115828200	115841858	-		non-IFN			20.2882	18.285	21.9891	20.2013	pink	purple	0.12702	0.0256787	0.101342	-1.18624	737.44	0.0121478	0.863516	0.965648	0.114384	0.00382781	0.176941	N	N	N	N
ATG13	ENSG00000175224.16	protein_coding	chr11	46617527	46674818	+	Cytosol;Nucleoplasm;Plasma membrane	non-IFN			22.2695	21.8373	22.6577	22.2321	salmon	brown	0.191203	0.180011	0.011192	-0.3087	1060.53	0.0255741	0.740274	0.9299	0.0448588	0.234848	-0.101702	N	N	N	N
ATG14	ENSG00000126775.8	protein_coding	chr14	55366392	55411858	-		non-IFN	Bone Density	Other	1.27165	1.11997	1.40946	1.25713	grey	grey	0.118683	0.0183477	0.100336	-1.12763	105.114	0.117807	0.361195	0.749151	0.114628	0.207152	-0.00812927	N	N	N	N
ATG16L1	ENSG00000085978.21	protein_coding	chr2	233210051	233295674	+	Cytosol	non-IFN			4.36165	4.40754	4.56048	4.15382	grey	grey	0.12109	0.017808	0.103282	-0.948896	215.037	0.108857	0.401632	0.778396	0.156456	0.25106	0.0728175	N	N	N	N
ATG16L2	ENSG00000168010.10	protein_coding	chr11	72814308	72843674	+		non-IFN			99.4955	99.7683	98.6635	100.037	darkturquoise	brown	0.315966	0.466095	-0.150129	0.246621	3429.88	-0.0267918	0.716473	0.923056	0.0230528	0.172252	-0.0295767	N	N	N	N
ATG2A	ENSG00000110046.12	protein_coding	chr11	64894546	64917248	-	Cytosol;Nucleus;Vesicles	non-IFN			1.78817	1.81539	1.87135	1.69556	grey	yellow	0.100997	0.0450544	0.0559427	-0.678808	93.2779	0.0183726	0.893995	0.975475	-0.0512882	-0.189589	0.0136641	N	N	N	N
ATG3	ENSG00000144848.10	protein_coding	chr3	112532509	112562046	-		non-IFN			190.999	193.18	192.317	188.298	blue	blue	0.242182	0.249543	-0.0073613	-0.562552	4439.45	0.0205718	0.681485	0.910466	-0.121424	0.0889404	-0.372736	N	N	N	N
ATG4A	ENSG00000101844.17	protein_coding	chrX	108091668	108154671	+	Actin filaments;Microtubules	non-IFN			5.05557	4.50022	6.3347	4.31893	royalblue	yellow	0.20572	0.0253016	0.180418	-2.94676	185.12	0.437708	0.00490027	0.0654258	0.188847	0.117536	-0.0482567	N	N	N	N
ATG4B	ENSG00000168397.16	protein_coding	chr2	241637213	241673857	+	Cytosol;Nucleoplasm	non-IFN			21.9481	22.6439	20.9483	22.3392	yellow	turquoise	0.202903	0.300516	-0.0976135	1.12942	596.187	-0.0720573	0.376892	0.761509	0.0454211	0.0736291	0.132317	N	N	N	N
ATG4C	ENSG00000125703.14	protein_coding	chr1	62784135	62865513	+	Cytosol;Nucleoplasm	non-IFN			7.06894	7.55186	7.21616	6.59817	blue	yellow	0.686097	0.10784	0.578257	-0.90672	313.313	0.102471	0.447519	0.805164	-0.0405807	-0.17698	-0.0202367	N	Y	N	N
ATG4D	ENSG00000130734.9	protein_coding	chr19	10543895	10553418	+		non-IFN			5.70216	5.74941	5.7491	5.62738	pink	turquoise	0.111196	0.0782348	0.0329612	-0.213403	166.536	0.0183899	0.884973	0.972654	-0.196548	-0.0945695	-0.305626	N	N	N	N
ATG5	ENSG00000057663.13	protein_coding	chr6	106045423	106325820	-	Centrosome	non-IFN			19.9277	19.2028	19.9145	20.4509	royalblue	blue	0.15235	0.118553	0.0337969	0.315858	325.808	0.039531	0.678566	0.909063	-0.0889354	0.226516	-0.392108	N	N	N	N
ATG7	ENSG00000197548.12	protein_coding	chr3	11272309	11557665	+	Nucleoplasm;Plasma membrane	non-IFN			43.5981	46.1467	41.0349	44.0607	pink	turquoise	0.137715	0.267174	-0.129459	1.23413	1585.51	-0.0965472	0.235741	0.639762	-0.189043	-0.228768	-0.100319	N	N	N	N
ATG9A	ENSG00000198925.10	protein_coding	chr2	219209772	219229717	-		non-IFN			13.0796	13.0268	12.4151	13.7032	turquoise	turquoise	0.358827	0.352797	0.0060298	1.18919	786.919	-0.12182	0.278204	0.682824	-0.336502	-0.175854	-0.350251	N	N	N	N
ATHL1	ENSG00000142102.15	protein_coding	chr11	289135	296107	+		non-IFN			3.56132	3.67688	3.455	3.57355	grey	turquoise	0.0722851	0.070026	0.00225914	0.287042	177.883	-0.018745	0.8982	0.976234	-0.0845595	-0.125417	-0.109659	N	N	N	N
ATIC	ENSG00000138363.14	protein_coding	chr2	215311817	215349773	+		non-IFN	Cholesterol	Chemicals and Drugs Category	10.7177	11.4615	10.2341	10.6193	grey	grey	0.126527	0.0189532	0.107574	0.30067	355.994	-0.0705066	0.613209	0.887621	-0.130078	-0.087139	-0.0902868	N	N	N	N
ATL2	ENSG00000119787.13	protein_coding	chr2	38294880	38377285	-		non-IFN			3.30124	3.29171	3.39434	3.22582	white	yellow	0.200321	0.0472443	0.153076	-0.309688	137.381	0.0683286	0.684407	0.910582	-0.00471812	0.0414305	-0.110178	N	N	N	N
ATL3	ENSG00000184743.12	protein_coding	chr11	63624087	63671921	-		non-IFN			7.48959	7.31891	7.5758	7.53401	pink	lightyellow	0.217753	0.152025	0.0657281	-0.0610001	727.633	-0.237043	0.0372448	0.257796	-0.0198748	0.0686755	-0.051543	N	N	N	N
ATM	ENSG00000149311.17	protein_coding	chr11	108222484	108369102	+		non-IFN	Metformin	Chemicals and Drugs Category	7.06062	7.575	6.32473	7.34684	turquoise	grey	0.187954	0.0428291	0.145125	1.45719	591.925	-0.115266	0.236241	0.640051	-0.0400429	-0.110106	0.23056	N	N	N	N
ATMIN	ENSG00000166454.9	protein_coding	chr16	81035847	81047358	+		non-IFN			2.48814	2.55549	2.39881	2.51941	salmon	red	0.100372	0.0293929	0.0709794	0.360196	195.108	-0.0687192	0.67602	0.908388	0.0420475	-0.0614702	0.263596	N	N	N	N
ATOX1	ENSG00000177556.11	protein_coding	chr5	151742316	151772532	-	Nucleoplasm;Plasma membrane	non-IFN	Heart Failure	Cardiovascular Diseases	114.38	106.012	129.344	107.083	magenta	black	0.294581	0.163188	0.131393	-3.86069	673.134	0.163166	0.0248491	0.201645	0.145235	-0.111682	-0.00345926	N	N	N	N
ATP10D	ENSG00000145246.13	protein_coding	chr4	47485288	47593486	+	Nucleoplasm	non-IFN			4.21865	4.63282	4.30089	3.85372	pink	grey	0.132774	0.0343829	0.0983907	-1.11597	329.84	0.201474	0.140084	0.511727	0.0540506	0.00562914	-0.0411652	N	N	N	N
ATP11A	ENSG00000068650.18	protein_coding	chr13	112690329	112887168	+		non-IFN			3.55349	3.40865	3.74631	3.48559	grey	greenyellow	0.0762253	0.0326693	0.043556	-0.969979	529.051	0.0955337	0.33974	0.732178	-0.108932	-0.0225165	-0.239381	N	N	N	N
ATP11B	ENSG00000058063.15	protein_coding	chr3	182793500	182921635	+	Cytosol;Microtubule organizing center	non-IFN			7.64989	7.53741	7.43381	7.91996	pink	blue	0.103084	0.136037	-0.032953	0.709699	526.915	0.0503457	0.677142	0.908779	-0.0198014	0.173377	-0.19787	N	N	N	N
ATP11C	ENSG00000101974.14	protein_coding	chrX	139726346	139945276	-		non-IFN			1.16746	1.07948	1.2077	1.19407	grey	blue	0.102669	0.0859063	0.0167625	-0.0840947	120.954	0.0187171	0.910718	0.980437	-0.199237	-0.0182384	-0.299918	N	N	N	N
ATP13A1	ENSG00000105726.16	protein_coding	chr19	19645198	19663693	-	Vesicles	non-IFN			23.2395	19.789	31.0221	18.8082	green	turquoise	0.268351	0.372816	-0.104466	-7.22125	1453.12	0.676483	8.1498e-12	9.82451e-10	0.371314	0.40192	0.0178152	Y	N	N	N
ATP13A2	ENSG00000159363.17	protein_coding	chr1	16985958	17011928	-		non-IFN			5.97323	6.03281	5.30621	6.51973	turquoise	red	0.211553	0.128295	0.083258	1.63141	344.118	-0.246933	0.101504	0.443912	-0.0205593	0.19702	-0.0266363	N	N	N	N
ATP13A3	ENSG00000133657.14	protein_coding	chr3	194402672	194498364	-	Cytosol;Nucleoli;Plasma membrane	non-IFN			1.55807	1.46268	1.69749	1.50238	pink	tan	0.283802	0.0698156	0.213986	-0.796748	184.011	0.149553	0.342608	0.733835	-0.104483	-0.0418808	-0.23056	N	N	N	N
ATP1A1	ENSG00000163399.15	protein_coding	chr1	116372668	116410261	+		non-IFN			70.1692	67.232	66.9012	75.1259	red	blue	0.182493	0.639718	-0.457226	2.11255	4107.07	-0.162623	0.0560422	0.324708	-0.467339	-0.155364	-0.511798	N	Y	N	N
ATP1A1-AS1	ENSG00000203865.9	processed_transcript	chr1	116392247	116418622	-		non-IFN			0.718672	0.69903	0.804289	0.656993	brown	grey	0.103089	0.0172707	0.0858182	-0.669894	8.66102	0.0825659	0.674145	0.907813	0.181875	0.13945	0.191963	N	N	N	N
ATP1B1	ENSG00000143153.12	protein_coding	chr1	169105697	169132722	+		non-IFN	Electrocardiography	Diagnostic Techniques and Procedures	0.85642	0.75658	0.890539	0.89679	grey	turquoise	0.16681	0.039537	0.127274	0.0345183	33.83	-0.00652384	0.974048	0.994213	-0.0964159	-0.0583179	-0.0835412	N	N	N	N
ATP1B3	ENSG00000069849.10	protein_coding	chr3	141876124	141926514	+		non-IFN			103.264	96.5826	109.91	102.118	grey	blue	0.0772618	0.0828791	-0.00561733	-1.52374	2007.56	0.0973667	0.168327	0.551959	-0.190754	-0.070702	-0.416322	N	N	N	N
ATP1B3-AS1	ENSG00000244124.1	antisense	chr3	141918252	141919021	-		non-IFN			0.849148	0.889016	0.92786	0.751555	orangered4	grey	0.0615641	0.0232914	0.0382727	-0.594655	3.86116	0.0876731	0.662542	0.90511	-0.0957305	0.0290946	-0.279081	N	N	N	N
ATP1B3P1	ENSG00000271707.1	processed_pseudogene	chr2	60734895	60735715	-		non-IFN			2.31062	1.99862	2.55881	2.31186	grey	grey	0.0886449	0.0169241	0.0717208	-1.53385	25.3413	0.126098	0.186255	0.577243	-0.144893	-0.212106	-0.163796	N	N	N	N
ATP23	ENSG00000166896.7	protein_coding	chr12	57941541	57957269	+		non-IFN	Multiple Sclerosis	Immune System Diseases;Nervous System Diseases	7.0039	7.73019	6.38521	7.03712	lightyellow	grey	0.119569	0.0297996	0.0897694	0.698738	120.278	-0.0944444	0.614991	0.888571	-0.261162	-0.31932	-0.252007	N	N	N	N
ATP2A2	ENSG00000174437.16	protein_coding	chr12	110280756	110351093	+		non-IFN			2.77263	2.51878	2.94974	2.79553	yellowgreen	tan	0.260744	0.0512957	0.209448	-0.573124	197.633	0.0824418	0.509112	0.843464	-0.0830194	-0.193867	-0.0153937	N	N	N	N
ATP2A3	ENSG00000074370.17	protein_coding	chr17	3923870	3964464	-		non-IFN			5.35673	5.29272	5.58306	5.20221	royalblue	turquoise	0.226765	0.0999172	0.126847	-0.732001	385.843	0.0705653	0.544188	0.861146	0.0596243	0.229669	-0.128858	N	N	N	N
ATP2B1	ENSG00000070961.15	protein_coding	chr12	89588049	89709300	-		non-IFN			16.6575	16.444	15.8777	17.4963	lightgreen	tan	0.141851	0.0744478	0.0674031	1.07234	1951.39	-0.142276	0.194154	0.588786	0.077519	0.335947	0.0197178	N	N	N	N
ATP2B4	ENSG00000058668.14	protein_coding	chr1	203626561	203744081	+		non-IFN			2.97396	2.89962	2.92805	3.06694	brown	grey60	0.146401	0.188327	-0.0419256	0.475839	438.522	-0.0691608	0.594771	0.879962	0.0509459	0.364768	-0.221393	N	N	N	N
ATP2C1	ENSG00000017260.19	protein_coding	chr3	130850595	131016712	+		non-IFN			10.9769	10.2261	11.6569	10.9068	purple	brown	0.161105	0.271029	-0.109924	-0.727163	679.115	0.0932341	0.443979	0.802901	-0.188872	-0.117536	-0.276914	N	N	N	N
ATP5A1	ENSG00000152234.15	protein_coding	chr18	46080248	46104334	-		non-IFN			145.266	148.353	140.014	147.721	yellow	blue	0.10922	0.153096	-0.0438768	1.41696	4230.06	-0.0825463	0.132853	0.500353	-0.165819	0.167748	-0.408712	N	N	N	N
ATP5A1P2	ENSG00000227682.2	transcribed_processed_pseudogene	chr2	155269633	155270134	+		non-IFN			5.20487	5.73342	4.80557	5.1841	darkturquoise	red	0.149292	0.0221547	0.127137	1.03903	19.8727	-0.0992039	0.35834	0.746495	0.00286021	-0.038053	0.116923	N	N	N	N
ATP5A1P3	ENSG00000263232.2	processed_pseudogene	chr16	72005037	72006543	-		non-IFN			1.24852	1.25324	1.22307	1.26766	grey	turquoise	0.109259	0.0454203	0.0638385	0.465272	27.3779	-0.0630232	0.543615	0.860805	-0.147069	0.0788079	-0.310815	N	N	N	N
ATP5B	ENSG00000110955.8	protein_coding	chr12	56638175	56646068	-		non-IFN			415.233	413.421	429.109	404.268	yellow	blue	0.314463	0.394717	-0.0802531	-1.64627	11542.9	0.0772537	0.178588	0.568099	-0.155747	0.00495364	-0.428084	N	N	N	N
ATP5C1	ENSG00000165629.19	protein_coding	chr10	7788129	7807815	+		non-IFN			210.477	211.773	221.653	199.7	darkolivegreen	greenyellow	0.373402	0.139622	0.23378	-3.37255	3286.23	0.133069	0.000685944	0.014763	0.127536	0.308702	-0.298016	Y	N	N	N
ATP5C1P1	ENSG00000224004.2	processed_pseudogene	chr14	53991101	53991995	-		non-IFN			15.1492	15.3854	15.7108	14.487	darkolivegreen	greenyellow	0.290084	0.147851	0.142233	-2.36902	175.048	0.1005	0.0308896	0.231644	0.107637	0.320185	-0.286773	N	N	N	N
ATP5D	ENSG00000099624.7	protein_coding	chr19	1241746	1244826	+		non-IFN			69.8248	66.9563	72.0388	69.896	turquoise	brown	0.225792	0.194442	0.0313497	-0.605058	670.814	0.0085574	0.918291	0.982318	0.0937757	0.0191391	0.0406464	N	N	N	N
ATP5E	ENSG00000124172.9	protein_coding	chr20	59025467	59032382	-		non-IFN			183.162	175.263	190.419	182.334	midnightblue	black	0.143294	0.482958	-0.339664	-1.03781	3597.08	0.0243884	0.750541	0.932808	0.139148	-0.113709	0.15878	N	Y	N	N
ATP5EP2	ENSG00000180389.6	protein_coding	chr13	27945206	27945590	+		non-IFN			59.803	58.3601	61.631	59.2086	midnightblue	black	0.142153	0.314591	-0.172438	-0.90712	188.537	0.0137859	0.866124	0.96629	0.021366	-0.175629	0.0406464	N	N	N	N
ATP5F1	ENSG00000116459.10	protein_coding	chr1	111448864	111462773	+		non-IFN			234.835	247.449	218.733	240.14	black	greenyellow	0.16759	0.188773	-0.0211826	2.59165	3336.27	-0.133502	0.00506807	0.0668953	-0.315699	-0.0574172	-0.401448	N	N	N	N
ATP5F1P1	ENSG00000224451.2	processed_pseudogene	chr13	51598416	51599460	+		non-IFN			1.75262	1.24291	1.98331	1.90886	turquoise	grey	0.350208	0.0291392	0.321069	-0.1535	17.1785	0.0322282	0.876213	0.969876	-0.075663	-0.163314	0.0280294	N	Y	N	N
ATP5G1	ENSG00000159199.13	protein_coding	chr17	48892765	48895871	+		non-IFN	Body Height	Body Weights and Measures;Diagnostic Techniques and Procedures;Physical Examination	183.255	179.469	181.449	187.52	tan	red	0.171395	0.0394258	0.131969	0.752597	716.106	-0.0629071	0.350569	0.739966	-0.0925779	-0.145232	-0.0226582	N	N	N	N
ATP5G1P5	ENSG00000227590.2	processed_pseudogene	chr13	106663437	106663847	+		non-IFN			1.69772	1.47188	1.77021	1.79317	pink	turquoise	0.081949	0.0388752	0.0430738	0.146973	6.25952	-0.0308803	0.826815	0.95525	-0.173373	-0.311179	-0.084752	N	N	N	N
ATP5G2	ENSG00000135390.17	protein_coding	chr12	53632726	53677408	-		non-IFN	Body Height	Body Weights and Measures;Diagnostic Techniques and Procedures;Physical Examination	284.142	280.716	283.877	286.795	steelblue	brown	0.106697	0.279206	-0.172509	0.354026	2264.27	-0.0433555	0.473752	0.820742	0.0797436	-0.199046	0.240765	N	N	N	N
ATP5G2P3	ENSG00000230482.1	processed_pseudogene	chr2	197263111	197263535	+		non-IFN	Circadian Rhythm	Other	0.707615	0.832703	0.637991	0.68075	grey	lightcyan	0.0777511	0.0402224	0.0375287	0.198098	3.44049	-0.0961855	0.620887	0.89006	-0.0335925	-0.27598	0.197115	N	N	N	N
ATP5G3	ENSG00000154518.9	protein_coding	chr2	175176258	175184607	-		non-IFN			234.889	241.962	224.107	239.41	grey	black	0.114639	0.0613249	0.0533141	1.86462	2476.68	-0.118245	0.0549653	0.321803	-0.115215	-0.055841	0.0276741	N	N	N	N
ATP5H	ENSG00000167863.11	protein_coding	chr17	75038863	75046985	-		non-IFN			278.64	262.989	300.888	270.056	turquoise	black	0.241934	0.1555	0.0864344	-3.04792	1921.58	0.113734	0.0848431	0.405463	0.211167	0.0198146	0.131798	N	N	N	N
ATP5HP2	ENSG00000229184.2	processed_pseudogene	chr9	2900320	2900804	-		non-IFN			1.54081	1.45666	1.77871	1.39031	red	turquoise	0.137139	0.0792621	0.0578765	-2.31704	7.54636	0.228369	0.136418	0.505777	0.126558	0.0414305	0.0660719	N	N	N	N
ATP5HP4	ENSG00000234925.2	processed_pseudogene	chr12	68642519	68642993	-		non-IFN			8.60637	7.31331	9.32326	8.88657	grey	grey	0.122974	0.0239705	0.0990036	-0.788236	43.1979	-0.00250715	0.978853	0.99516	0.220798	0.157166	0.266709	N	N	N	N
ATP5I	ENSG00000169020.9	protein_coding	chr4	672436	674338	-		non-IFN			292.599	295.22	293.871	289.626	lightyellow	black	0.117281	0.259211	-0.14193	-0.366339	496.144	-0.0233888	0.758344	0.935203	-0.0156456	-0.206477	0.028366	N	N	N	N
ATP5J	ENSG00000154723.12	protein_coding	chr21	25716503	25735673	-		non-IFN			196.497	188.7	204.306	195.11	saddlebrown	black	0.208026	0.0399875	0.168038	-1.34813	1281.91	0.0366641	0.525433	0.850846	0.0787657	0.0445828	-0.0975513	N	N	N	N
ATP5J2	ENSG00000241468.7	protein_coding	chr7	99448475	99466331	-		non-IFN			729.665	699.151	763.53	721.322	lightyellow	black	0.209545	0.144976	0.0645685	-1.44614	891.216	0.0401622	0.540425	0.858499	0.138292	0.19792	-0.194238	N	N	N	N
ATP5L	ENSG00000167283.7	protein_coding	chr11	118401154	118431496	+		non-IFN			148.612	150.558	145.186	150.261	yellow	brown	0.123893	0.177413	-0.0535202	1.47582	3428.53	-0.0828483	0.102369	0.445236	-0.0668604	-0.124967	0.0880383	N	N	N	N
ATP5L2	ENSG00000249222.1	protein_coding	chr22	42639803	42640601	-		non-IFN			5.04403	5.16923	4.73139	5.2315	turquoise	grey	0.107178	0.0252852	0.0818931	2.53158	50.4462	-0.165226	0.0249913	0.202326	-0.0922845	-0.0470596	0.0513701	N	N	N	N
ATP5LP3	ENSG00000249256.2	processed_pseudogene	chr4	24658072	24658375	-		non-IFN			7.27622	6.91558	7.775	7.09068	grey	blue	0.0797811	0.0512969	0.0284841	-1.31049	13.2181	0.0957532	0.410837	0.785866	0.219234	0.0146358	0.374119	N	N	N	N
ATP5O	ENSG00000241837.6	protein_coding	chr21	33903453	33915980	-		non-IFN			226.739	223.335	229.712	226.519	saddlebrown	black	0.129001	0.0369193	0.092082	-0.361818	768.78	-0.0286171	0.66483	0.905528	0.157605	0.284834	-0.00588075	N	N	N	N
ATP5S	ENSG00000125375.14	protein_coding	chr14	50312326	50335558	+	Mitochondria;Nucleoplasm	non-IFN			14.093	13.345	14.6797	14.1032	grey	turquoise	0.181596	0.0663578	0.115238	-0.539554	388.163	-0.0681643	0.324546	0.721312	-0.040703	-0.0817351	-0.0873464	N	N	N	N
ATP5SL	ENSG00000105341.18	protein_coding	chr19	41431318	41440717	-	Mitochondria	non-IFN			16.1876	16.5106	16.6208	15.5773	grey	turquoise	0.123274	0.184548	-0.061274	-0.849437	348.64	0.063954	0.54062	0.858499	-0.131961	0.127444	-0.370833	N	N	N	N
ATP6AP1	ENSG00000071553.16	protein_coding	chrX	154428632	154436516	+	Cytosol;Microtubules;Plasma membrane	non-IFN			160.496	153.789	171.114	155.862	magenta	turquoise	0.200555	1	-0.799445	-2.41534	5204.88	0.128626	0.0134729	0.134439	-0.0462767	0.0806092	-0.477033	N	Y	N	N
ATP6AP2	ENSG00000182220.14	protein_coding	chrX	40579372	40606848	+		non-IFN			442.301	451.456	417.381	457.828	paleturquoise	brown	0.289291	0.697051	-0.40776	1.95393	11332.9	-0.137788	0.035512	0.25142	-0.308707	0.126093	-0.453337	N	Y	N	N
ATP6V0A1	ENSG00000033627.15	protein_coding	chr17	42458844	42522611	+	Golgi apparatus	non-IFN			19.9055	18.9425	18.5182	21.8094	tan	turquoise	0.127909	0.24845	-0.120542	2.06109	1208.27	-0.222228	0.0275976	0.216453	-0.222167	-0.125417	-0.203578	N	N	N	N
ATP6V0A2	ENSG00000185344.13	protein_coding	chr12	123712318	123761755	+	Cytosol;Plasma membrane	non-IFN			5.9854	6.71659	5.49699	5.90022	darkolivegreen	turquoise	0.205857	0.120299	0.0855583	0.75904	350.391	-0.0359503	0.75355	0.933434	-0.032978	0.319285	-0.273282	N	N	N	N
ATP6V0B	ENSG00000117410.13	protein_coding	chr1	43974487	43978295	+	Cytosol	non-IFN			557.293	544.661	556.468	566.938	darkred	blue	0.106718	0.493028	-0.38631	0.727433	6964.23	-0.0457071	0.18337	0.572397	-0.288172	-0.0698013	-0.339527	N	Y	N	N
ATP6V0C	ENSG00000185883.11	protein_coding	chr16	2513870	2520218	+		non-IFN			270.724	250.443	284.003	273.323	black	turquoise	0.2171	0.0514628	0.165637	-1.04177	9.7146	-0.295827	0.0611482	0.340394	0.0777155	0.150185	-0.147377	N	N	N	N
ATP6V0D1	ENSG00000159720.11	protein_coding	chr16	67438014	67481237	-		non-IFN			264.844	257.363	276.285	260.03	saddlebrown	turquoise	0.169302	0.48001	-0.310708	-1.52828	6673.44	0.0821997	0.119059	0.476327	-0.121791	-0.0839867	-0.293173	N	Y	N	N
ATP6V0E1	ENSG00000113732.8	protein_coding	chr5	172983757	173035445	+		non-IFN			663.634	615.709	713.955	653.062	green	yellow	0.281301	0.0989203	0.182381	-3.03545	5727.62	0.109513	0.0243189	0.198812	-0.118833	-0.0929934	-0.465271	N	N	N	N
ATP6V0E2	ENSG00000171130.17	protein_coding	chr7	149872968	149880698	+		non-IFN			4.63169	5.31125	4.13321	4.59184	grey	purple	0.0745137	0.033893	0.0406207	0.74699	103.992	-0.181699	0.306203	0.708046	0.057486	-0.0528072	0.28954	N	N	N	N
ATP6V1A	ENSG00000114573.9	protein_coding	chr3	113747019	113812056	+		non-IFN	Bone Density	Other	42.2782	41.6765	41.2411	43.618	red	blue	0.281793	0.426742	-0.144949	0.911314	3101.35	-0.0815832	0.299874	0.702446	-0.133134	0.175179	-0.307875	N	N	N	N
ATP6V1B2	ENSG00000147416.10	protein_coding	chr8	20197367	20226819	+		non-IFN			235.873	237.276	224.802	244.651	blue	yellow	0.407281	0.529135	-0.121854	1.30573	10526.9	-0.117219	0.176062	0.56547	-0.426856	-0.289788	-0.480319	N	N	N	N
ATP6V1C1	ENSG00000155097.11	protein_coding	chr8	103021063	103073051	+		non-IFN			24.6229	23.4894	27.4912	22.8922	red	blue	0.166427	0.15	0.0164266	-2.3834	890.963	0.139068	0.196298	0.591458	-0.149024	-0.125868	-0.382249	N	N	N	N
ATP6V1D	ENSG00000100554.11	protein_coding	chr14	67294371	67360265	-	Nucleoplasm	non-IFN	Platelet Function Tests	Diagnostic Techniques and Procedures	65.5476	62.4433	67.4349	66.0736	blue	yellow	0.247859	0.093251	0.154608	-0.325566	944.776	0.0188567	0.835324	0.957805	-0.118026	-0.125642	-0.193892	N	N	N	N
ATP6V1E1	ENSG00000131100.12	protein_coding	chr22	17592136	17628818	-	Nucleoplasm	non-IFN			72.9544	69.093	77.5777	71.6008	blue	greenyellow	0.198617	0.199496	-0.000878903	-1.52114	1282.94	0.114483	0.0765027	0.386967	-0.0986894	-0.197695	-0.0795631	N	N	N	N
ATP6V1E1P1	ENSG00000225099.1	processed_pseudogene	chr1	42903232	42903912	+		non-IFN			1.70458	1.69067	1.7567	1.66842	blue	blue	0.189109	0.0794347	0.109674	-0.655326	13.6665	0.0601463	0.586177	0.876684	-0.0190192	0.0333245	-0.151343	N	N	N	N
ATP6V1E2	ENSG00000250565.6	protein_coding	chr2	46490750	46542557	-		non-IFN	Body Height	Body Weights and Measures;Diagnostic Techniques and Procedures;Physical Examination	2.71563	2.70827	2.53209	2.88277	grey	turquoise	0.0947904	0.0533624	0.041428	0.982093	68.6899	-0.117774	0.498751	0.837544	-0.0681316	0.132622	-0.294729	N	N	N	N
ATP6V1F	ENSG00000128524.4	protein_coding	chr7	128862826	128865844	+		non-IFN			437.861	415.292	464.913	429.922	darkolivegreen	red	0.172438	0.046672	0.125766	-2.78236	3785.79	0.0863884	0.0612684	0.340461	0.106023	-0.0072053	0.0266363	N	N	N	N
ATP6V1G1	ENSG00000136888.6	protein_coding	chr9	114587746	114598373	+		non-IFN			260.57	260.203	274.651	248.406	pink	brown	0.185909	0.196709	-0.0108006	-2.45893	3861.02	0.12519	0.0177981	0.161312	-0.0334913	0.0409801	-0.296459	N	N	N	N
ATP6V1H	ENSG00000047249.16	protein_coding	chr8	53715557	53843558	-	Actin filaments;Cytosol	non-IFN			52.2272	42.59	58.9117	53.1318	darkred	turquoise	0.0848799	0.0449958	0.0398841	-0.772678	479.095	0.0643826	0.522286	0.849764	-0.0097296	0.0164371	-0.0588075	N	N	N	N
ATP7A	ENSG00000165240.18	protein_coding	chrX	77910656	78050395	+		non-IFN			0.952556	0.977021	0.949959	0.937577	white	turquoise	0.102683	0.0576064	0.0450768	-0.0729626	129.179	0.0185543	0.919427	0.982364	-0.0712119	-0.166397	0.0313063	N	N	N	N
ATP8A1	ENSG00000124406.16	protein_coding	chr4	42408373	42657105	-		non-IFN			1.33637	1.30209	1.44699	1.26297	turquoise	lightcyan	0.0897527	0.0482036	0.0415491	-0.94966	152.971	0.181492	0.289172	0.693102	0.223683	0.174503	0.156186	N	N	N	N
ATP8B3	ENSG00000130270.16	protein_coding	chr19	1782075	1812276	-		non-IFN			1.43244	1.31744	1.64729	1.32405	grey	grey	0.159542	0.0217949	0.137747	-1.19853	66.1753	0.209589	0.250561	0.654408	0.0291399	0.140954	-0.0909786	N	N	N	N
ATP8B4	ENSG00000104043.14	protein_coding	chr15	49858238	50182817	-	Nucleoplasm;Vesicles	non-IFN	Metabolism	Other	2.46127	2.2065	2.75115	2.38533	saddlebrown	turquoise	0.129153	0.0949775	0.0341756	-1.17694	232.998	0.176947	0.194791	0.58956	0.0833372	0.0806092	0.0342467	N	N	N	N
ATP8B5P	ENSG00000179766.18	transcribed_unprocessed_pseudogene	chr9	35406755	35483035	+		non-IFN			2.57673	2.55027	2.72682	2.46298	pink	grey	0.188837	0.0258005	0.163036	-1.53405	85.6713	0.134889	0.161481	0.54162	0.0176013	-0.0412053	-0.0712608	N	N	N	N
ATP9B	ENSG00000166377.19	protein_coding	chr18	79069285	79378283	+		non-IFN			17.5827	16.8377	18.0781	17.6716	lightcyan	green	0.0769701	0.0932009	-0.0162308	-0.498263	572.208	-0.0140619	0.847692	0.961893	-0.00146677	-0.0204901	0.0605371	N	N	N	N
ATPAF1	ENSG00000123472.12	protein_coding	chr1	46632737	46673867	-	Mitochondria	non-IFN			29.8222	31.7785	26.7149	31.1831	brown	red	0.2722	0.224442	0.0477575	1.99988	816.354	-0.245821	0.0138381	0.136659	-0.118271	0.193867	-0.122112	N	N	N	N
ATPAF2	ENSG00000171953.15	protein_coding	chr17	17977409	18039209	-		non-IFN			21.2287	22.3274	19.4589	22.0148	greenyellow	turquoise	0.142577	0.0942835	0.0482938	1.94746	372.781	-0.235169	0.0063256	0.0782446	-0.150295	0.0522384	-0.262904	N	N	N	N
ATPIF1	ENSG00000130770.17	protein_coding	chr1	28236109	28246906	+		non-IFN			194.318	191.797	196.117	194.509	blue	black	0.171504	0.105815	0.0656897	-0.252496	1157.25	0.00894531	0.871739	0.968315	0.097296	0.0790331	0.156359	N	N	N	N
ATR	ENSG00000175054.14	protein_coding	chr3	142449235	142578826	-		non-IFN	Erythrocyte Count	Diagnostic Techniques and Procedures	1.82696	1.96383	1.81804	1.73822	darkturquoise	blue	0.081731	0.0557364	0.0259946	-0.467516	246.96	0.0613679	0.617544	0.889095	0.109666	0.158066	0.0401275	N	N	N	N
ATRAID	ENSG00000138085.16	protein_coding	chr2	27212027	27217178	+		non-IFN			169.469	176.331	164.781	168.762	grey	blue	0.141365	0.174752	-0.0333872	0.709492	2164.34	-0.0496783	0.292237	0.695097	-0.219796	0.0378278	-0.41909	N	N	N	N
ATRIP	ENSG00000164053.18	protein_coding	chr3	48446710	48465716	+		non-IFN			0.82713	1.08283	0.661543	0.79274	grey	yellow	0.0901335	0.0468857	0.0432478	0.605672	78.5707	-0.27452	0.169095	0.553956	-0.136459	-0.133073	-0.18092	N	N	N	N
ATRN	ENSG00000088812.17	protein_coding	chr20	3471040	3651122	+	Cytosol	non-IFN			24.2786	26.7247	19.6132	26.6685	turquoise	blue	0.198872	0.220387	-0.0215149	4.74147	1527.56	-0.405273	6.41835e-05	0.00213484	-0.299735	0.182609	-0.27899	Y	N	N	N
ATRX	ENSG00000085224.21	protein_coding	chrX	77504878	77786269	-		non-IFN			7.80629	8.11489	7.83153	7.56619	lightcyan	green	0.234904	0.0656596	0.169245	-0.653735	1347.51	0.0229832	0.75105	0.932809	0.164645	0.172702	0.173482	N	N	N	N
ATXN1	ENSG00000124788.17	protein_coding	chr6	16299112	16761491	-		non-IFN			1.07889	1.0229	1.1256	1.07719	turquoise	grey	0.128791	0.0283314	0.10046	-0.405057	197.07	0.0401782	0.7733	0.940285	0.00019557	0.0929934	-0.138198	N	N	N	N
ATXN10	ENSG00000130638.15	protein_coding	chr22	45671798	45845307	+	Plasma membrane	non-IFN			36.4983	37.9607	37.2249	34.8248	saddlebrown	blue	0.184133	0.0725813	0.111551	-1.19859	1346.32	0.0624981	0.385901	0.767283	0.0332958	0.101324	-0.118999	N	N	N	N
ATXN1L	ENSG00000224470.7	protein_coding	chr16	71845991	71885268	+		non-IFN			1.81507	1.72114	1.72262	1.96296	turquoise	magenta	0.148241	0.0364963	0.111745	1.13085	245.172	-0.170363	0.245262	0.648856	-0.0570086	0.0072053	0.0373601	N	N	N	N
ATXN2	ENSG00000204842.14	protein_coding	chr12	111452214	111599676	-		non-IFN	Mental Processes	Psychological Phenomena and Processes	5.40418	5.47158	5.17144	5.56197	darkgrey	turquoise	0.153333	0.119314	0.0340187	0.708402	332.989	-0.0791265	0.561162	0.868302	-0.243264	-0.235748	-0.248029	N	N	N	N
ATXN2L	ENSG00000168488.18	protein_coding	chr16	28823035	28837237	+		non-IFN			14.0028	13.829	13.7626	14.3375	grey	turquoise	0.294482	0.432018	-0.137536	0.627724	821.407	-0.0461806	0.595102	0.880012	-0.120178	0.0961457	-0.246819	N	N	N	N
ATXN3	ENSG00000066427.21	protein_coding	chr14	92038652	92106621	-	Nucleoli;Nucleus;Plasma membrane	non-IFN			16.298	15.2858	17.6134	15.8518	grey	blue	0.109009	0.0780808	0.0309285	-1.19159	627.929	0.0955558	0.101846	0.444164	0.0844862	-0.0758808	0.174866	N	N	N	N
ATXN7	ENSG00000163635.17	protein_coding	chr3	63864557	64003462	+		non-IFN			2.14305	1.86218	2.56054	1.97294	brown	pink	0.14838	0.0357801	0.112599	-2.5554	252.009	0.296177	0.00752389	0.0894588	0.0372561	-0.274026	0.175558	N	N	N	N
ATXN7L1	ENSG00000146776.14	protein_coding	chr7	105605067	105876604	-	Cytosol;Nucleus	non-IFN			3.98746	3.98743	3.87822	4.08386	grey	turquoise	0.133484	0.0805962	0.0528881	0.484404	191.939	-0.0437971	0.744531	0.931445	0.0527061	0.145232	0.051543	N	N	N	N
ATXN7L2	ENSG00000162650.16	protein_coding	chr1	109483479	109492804	+	Cytosol;Nucleoli;Vesicles	non-IFN			1.61476	1.6706	1.49375	1.68213	orange	turquoise	0.180902	0.0326082	0.148294	0.682232	60.7867	-0.147083	0.42971	0.795103	-0.215738	-0.345854	0.0134911	N	N	N	N
ATXN7L3	ENSG00000087152.15	protein_coding	chr17	44191805	44200113	-	Nuclear speckles;Plasma membrane	non-IFN			4.03375	3.6837	4.25591	4.08482	red	grey	0.194126	0.0279911	0.166135	-0.444256	245.198	0.0348512	0.789001	0.944744	0.227888	0.256689	0.18559	N	N	N	N
ATXN7L3B	ENSG00000253719.3	protein_coding	chr12	74537827	74545430	+	Nucleoplasm	non-IFN			9.17772	9.12721	9.20112	9.19272	grey	blue	0.155992	0.347988	-0.191996	-0.0144284	1078.37	0.0005173	0.995381	0.99909	-0.166772	0.0159868	-0.369103	N	N	N	N
AUH	ENSG00000148090.11	protein_coding	chr9	91213815	91361913	-		non-IFN			5.54375	6.63767	4.90791	5.33261	grey	grey	0.173522	0.0226507	0.150871	0.715051	121.031	-0.102103	0.540107	0.858465	-0.115631	-0.0164371	-0.169504	N	N	N	N
AUNIP	ENSG00000127423.10	protein_coding	chr1	25831913	25859458	-		non-IFN			1.45892	1.39228	1.47255	1.49394	red	pink	0.0992315	0.0936792	0.00555233	0.127869	15.3314	-0.0777911	0.689393	0.911835	-0.157067	-0.0335497	-0.205653	N	N	N	N
AUP1	ENSG00000115307.16	protein_coding	chr2	74526645	74529939	-	Nucleoplasm;Vesicles	non-IFN			77.2316	75.9536	77.2144	78.1487	grey	turquoise	0.146627	0.342911	-0.196284	0.346349	1985.43	-0.0203467	0.640871	0.896919	-0.0918445	0.0294967	-0.190087	N	N	N	N
AURKA	ENSG00000087586.17	protein_coding	chr20	56369389	56392337	-	Centrosome;Cytosol;Nucleus	non-IFN			1.64927	1.82926	1.40468	1.73804	brown	turquoise	0.082388	0.0464643	0.0359237	1.33397	51.458	-0.224736	0.229923	0.634852	-0.238791	-0.107404	-0.266882	N	N	N	N
AURKAIP1	ENSG00000175756.13	protein_coding	chr1	1373730	1375495	-		non-IFN			107.627	104.358	112.193	105.904	lightyellow	red	0.33507	0.20443	0.13064	-1.20938	1171.85	0.058458	0.364639	0.752032	0.0315356	0.185311	-0.236614	N	N	N	N
AVEN	ENSG00000169857.7	protein_coding	chr15	33866227	34039176	-	Actin filaments;Centrosome;Plasma membrane	non-IFN			1.5644	1.75319	1.27894	1.68303	turquoise	red	0.546756	0.0330073	0.513749	1.06289	35.9234	-0.214385	0.300265	0.70268	-0.190677	-0.0124117	-0.231598	N	Y	N	N
AVL9	ENSG00000105778.17	protein_coding	chr7	32495426	32588721	+	Endoplasmic reticulum	non-IFN			5.54043	5.36744	5.62688	5.58625	pink	grey	0.341276	0.0255434	0.315732	-0.0826703	466.746	0.0298014	0.780125	0.942044	0.033418	0.207603	-0.104816	N	Y	N	N
AVPI1	ENSG00000119986.6	protein_coding	chr10	97677424	97687323	-	Nucleus;Plasma membrane	non-IFN			4.66483	4.83117	5.49924	3.81116	pink	tan	0.154146	0.0551253	0.0990204	-1.72052	98.7064	0.372727	0.0489797	0.302748	-0.0356915	-0.0378278	-0.122631	N	N	N	N
AXIN1	ENSG00000103126.14	protein_coding	chr16	287440	352673	-		non-IFN			1.17228	1.01665	1.1694	1.28468	darkgreen	grey	0.125104	0.0266989	0.0984054	0.745718	67.2929	-0.129999	0.393185	0.772189	0.0689384	-0.120464	0.346099	N	N	N	N
AZI2	ENSG00000163512.13	protein_coding	chr3	28315003	28349127	-		non-IFN			40.121	38.7758	43.8046	37.8205	red	blue	0.278372	0.107773	0.170599	-2.16452	702.189	0.158599	0.0559517	0.324421	-0.0576687	-0.0574172	-0.209458	N	N	N	N
AZIN1	ENSG00000155096.13	protein_coding	chr8	102826357	102893864	-	Vesicles	non-IFN			21.844	22.9011	21.7734	21.1601	paleturquoise	tan	0.177188	0.0935201	0.0836682	-0.432227	1227.6	0.0296674	0.735618	0.929327	-0.0567641	0.00990728	-0.108448	N	N	N	N
AZIN1-AS1	ENSG00000253320.5	antisense	chr8	102864300	102977876	+		non-IFN	Electrocardiography	Diagnostic Techniques and Procedures	1.7729	1.84672	1.82108	1.67829	violet	grey	0.121863	0.0240472	0.0978154	-0.344974	8.92993	0.101753	0.621915	0.890789	0.124446	0.225902	0.112983	N	N	N	N
AZU1	ENSG00000172232.9	protein_coding	chr19	825097	832018	+		non-IFN			2.62581	2.32163	3.30127	2.24453	grey	grey	0.0862309	0.0264012	0.0598297	-2.71962	50.6863	0.33097	0.0127739	0.129761	0.205373	0.215934	0.0122804	N	N	N	N
B2M	ENSG00000166710.17	protein_coding	chr15	44711477	44718877	+		non-IFN			21325	19618.3	25267.3	19051.4	green	midnightblue	0.357139	0.0656089	0.291531	-8.61726	276944	0.380076	2.11227e-17	4.00468e-15	0.26842	0.240702	-0.159126	Y	Y	Y	Y
B3GALNT1P1	ENSG00000229948.2	processed_pseudogene	chr2	69597353	69598951	+		non-IFN			1.17701	1.27018	1.05518	1.21873	grey	grey	0.0921844	0.0250403	0.0671441	0.543291	21.1014	-0.115997	0.57169	0.871953	-0.012913	-0.0210224	0.0878653	N	N	N	N
B3GALNT2	ENSG00000162885.12	protein_coding	chr1	235449923	235504481	-	Golgi apparatus;Nucleoplasm	non-IFN			3.64291	3.81711	3.30971	3.81395	turquoise	turquoise	0.178245	0.0914843	0.0867605	0.920512	110.973	-0.164514	0.342379	0.733835	-0.156089	-0.236649	0.047219	N	N	N	N
B3GALT4	ENSG00000235863.3	protein_coding	chr6	33277132	33284832	+		non-IFN			13.2722	13.0011	14.3896	12.4775	grey	turquoise	0.123655	0.218075	-0.09442	-1.78323	334.337	0.184946	0.0845466	0.405241	-0.222803	-0.155589	-0.51422	N	N	N	N
B3GALT6	ENSG00000176022.4	protein_coding	chr1	1232265	1235041	+		non-IFN			0.77917	0.790789	0.846224	0.711802	brown	lightyellow	0.113032	0.0318186	0.081213	-0.964107	33.5656	0.151154	0.418936	0.791388	-0.136165	-0.186887	-0.120382	N	N	N	N
B3GAT2	ENSG00000112309.10	protein_coding	chr6	70856679	70957038	-		non-IFN			5.22272	5.18971	5.03501	5.41165	grey	black	0.166749	0.131914	0.0348343	0.996355	35.5466	-0.0616966	0.738515	0.929668	-0.0874442	0.096596	-0.147538	N	N	N	N
B3GAT3	ENSG00000149541.9	protein_coding	chr11	62615296	62622175	-		non-IFN			15.5718	15.0526	16.2336	15.3545	darkgreen	turquoise	0.146446	0.155696	-0.00924997	-1.00149	384.435	0.070189	0.344697	0.735376	-0.0153278	0.112132	-0.204097	N	N	N	N
B3GAT3P1	ENSG00000244009.1	processed_pseudogene	chr3	160452598	160453403	+		non-IFN			1.03788	1.14257	0.989491	1.00668	lightyellow	turquoise	0.171247	0.101071	0.0701769	0.170471	10.0625	-0.0229306	0.865068	0.96605	-0.263433	-0.21053	-0.374465	N	N	N	N
B3GLCT	ENSG00000187676.7	protein_coding	chr13	31199936	31332276	+		non-IFN			0.964313	1.07262	0.60293	1.20673	grey	turquoise	0.12818	0.0620642	0.0661159	3.53304	63.6117	-0.556714	0.00640286	0.0791064	-0.220996	0.0113835	-0.194238	N	N	N	N
B3GNT2	ENSG00000170340.10	protein_coding	chr2	62196113	62224731	+	Vesicles	non-IFN			14.7987	14.3131	15.274	14.7221	darkolivegreen	lightyellow	0.229697	0.121671	0.108025	-0.353632	592.071	0.0508533	0.696901	0.91575	-0.0675694	0.102675	-0.204097	N	N	N	N
B3GNT5	ENSG00000176597.11	protein_coding	chr3	183253244	183298504	+	Nucleoli	non-IFN			4.46002	3.94205	4.67172	4.63885	brown	lightyellow	0.204716	0.143288	0.0614285	-0.0473063	202.319	-0.000732062	0.996488	0.999095	-0.0845595	0.151536	-0.242321	N	N	N	N
B3GNT8	ENSG00000177191.2	protein_coding	chr19	41425359	41428730	-		non-IFN			8.33941	7.00394	9.77873	8.01211	lightyellow	turquoise	0.207472	0.137072	0.0704001	-1.62946	174.149	0.229828	0.115112	0.469772	0.0151811	0.158517	-0.282276	N	N	N	N
B3GNT9	ENSG00000237172.3	protein_coding	chr16	67148105	67151214	-	Nucleoli fibrillar center	non-IFN			1.55699	1.51856	1.63869	1.51202	cyan	grey	0.159154	0.0249984	0.134155	-0.826762	3.90174	0.13037	0.272016	0.676354	-0.0803792	-0.0974967	0.0126263	N	N	N	N
B3GNTL1	ENSG00000175711.8	protein_coding	chr17	82942155	83051810	-	Nucleoli	non-IFN			6.47795	6.52098	6.26428	6.6361	darkred	red	0.0870688	0.0274498	0.059619	0.588672	125.495	-0.0281507	0.815745	0.953337	-0.16621	-0.198596	-0.0550023	N	N	N	N
B4GALT1	ENSG00000086062.12	protein_coding	chr9	33104082	33167356	-		non-IFN	Immunoglobulins	Chemicals and Drugs Category	32.6431	30.2458	33.3046	33.7517	lightgreen	brown	0.34181	0.151005	0.190805	0.211329	2238.43	-0.0342326	0.674456	0.908086	-0.0425609	0.35351	-0.340392	N	N	N	N
B4GALT1-AS1	ENSG00000233554.5	antisense	chr9	33166975	33179983	+		non-IFN			4.22967	4.25335	3.75204	4.6344	brown	turquoise	0.105253	0.0381029	0.0671499	1.20269	39.5093	-0.198326	0.327324	0.722819	-0.0877375	0.165497	-0.217934	N	N	N	N
B4GALT3	ENSG00000158850.14	protein_coding	chr1	161171310	161177968	-		non-IFN			15.249	14.1519	16.7576	14.6923	blue	blue	0.108451	0.143218	-0.0347665	-1.55873	458.548	0.175608	0.113264	0.466388	-0.159047	-0.215934	-0.282795	N	N	N	N
B4GALT4	ENSG00000121578.12	protein_coding	chr3	119211732	119241103	-		non-IFN			4.25173	4.10939	4.58695	4.05642	lightcyan	grey	0.193644	0.0263999	0.167244	-0.894333	163.832	0.192766	0.229577	0.634842	-0.0612378	-0.302397	0.142522	N	N	N	N
B4GALT5	ENSG00000158470.5	protein_coding	chr20	49632945	49713878	-		non-IFN			1.76826	1.50084	2.19581	1.57977	grey	grey	0.122329	0.0207843	0.101545	-2.91361	143.589	0.390902	0.00487436	0.0652905	0.229721	0.158742	0.15411	N	N	N	N
B4GALT7	ENSG00000027847.13	protein_coding	chr5	177600100	177610347	+		non-IFN			11.0767	11.8826	9.71029	11.7136	grey	turquoise	0.0634097	0.127259	-0.063849	2.54664	279.969	-0.258508	0.00946062	0.104836	-0.267026	-0.00855629	-0.353364	N	N	N	N
B9D2	ENSG00000123810.7	protein_coding	chr19	41354421	41364173	-		non-IFN			11.2223	10.9374	10.3771	12.169	blue	turquoise	0.234664	0.103096	0.131568	1.44702	150.849	-0.196534	0.213186	0.614354	-0.182051	-0.182834	-0.0972053	N	N	N	N
BAALC-AS1	ENSG00000247081.7	antisense	chr8	103156990	103298772	-		non-IFN			1.5302	1.44807	1.58621	1.53875	grey	grey	0.0788645	0.0278496	0.0510148	-0.30273	10.6806	0.0118854	0.933146	0.985712	-0.0154745	-0.024543	-0.0577697	N	N	N	N
BABAM1	ENSG00000105393.15	protein_coding	chr19	17267350	17281249	+		non-IFN			54.5107	54.0839	54.1209	55.1557	turquoise	turquoise	0.288756	0.433261	-0.144504	0.383252	343.392	-0.0233363	0.705862	0.919147	-0.268835	-0.0349007	-0.522176	N	N	N	N
BACE1	ENSG00000186318.16	protein_coding	chr11	117285207	117316259	-		non-IFN			1.58319	1.42615	1.65717	1.62877	orange	grey	0.147544	0.0257376	0.121806	-0.101953	82.041	-0.107163	0.598392	0.881138	-0.0318534	-0.0175629	-0.0325171	N	N	N	N
BACE1-AS	ENSG00000278768.1	antisense	chr11	117290874	117293571	+		non-IFN			4.79869	4.97664	4.38105	5.04159	white	blue	0.0930161	0.0330017	0.0600143	0.927542	26.4275	-0.0507672	0.789858	0.945066	-0.155062	-0.264344	-0.0138371	N	N	N	N
BACH1	ENSG00000156273.15	protein_coding	chr21	29194071	29630751	+	Cytosol;Nucleus	non-IFN	Pancreatic Carcinoma	Neoplasms	22.7876	21.2456	25.1191	21.8188	black	blue	0.126778	0.0920129	0.0347649	-2.32494	2162.55	0.188275	0.0139831	0.137685	-0.0723364	-0.221113	-0.140273	N	N	N	N
BACH1-AS1	ENSG00000232118.2	lincRNA	chr21	29370019	29376339	-		non-IFN			1.39698	1.16918	1.42075	1.53679	grey	green	0.0974781	0.0573488	0.0401293	0.959307	12.7054	-0.0983623	0.406707	0.783256	0.10243	-0.0459338	0.30234	N	N	N	N
BACH1-IT1	ENSG00000248476.1	sense_intronic	chr21	29351634	29361894	+		non-IFN	Pancreatic Carcinoma	Neoplasms	0.964236	0.763498	1.10361	0.982958	black	grey	0.119879	0.026484	0.0933954	-0.542447	13.2248	0.0696475	0.727624	0.926138	-0.0800221	-0.0585691	-0.0370141	N	N	N	N
BAD	ENSG00000002330.13	protein_coding	chr11	64269830	64284704	-		non-IFN			33.8681	35.6443	29.8888	36.1254	grey	grey	0.0695653	0.0369415	0.0326238	3.03043	361.225	-0.300989	0.000576659	0.0130295	-0.115704	0.0466093	0.0385708	Y	N	N	N
BAG1	ENSG00000107262.17	protein_coding	chr9	33247820	33264761	-		non-IFN			55.637	55.7341	59.1715	52.4496	green	blue	0.165623	0.280413	-0.11479	-2.47587	1151.99	0.153396	0.00508949	0.0670084	0.269495	0.400569	-0.0596723	N	N	N	N
BAG3	ENSG00000151929.9	protein_coding	chr10	119651370	119677819	+		non-IFN			1.58093	1.30262	1.91727	1.48061	darkgreen	grey	0.110227	0.0229294	0.0872974	-1.46834	67.2574	0.250065	0.206269	0.604006	0.0014179	-0.00213931	-0.141138	N	N	N	N
BAG4	ENSG00000156735.10	protein_coding	chr8	38176533	38213301	+		non-IFN			12.4392	11.9721	12.9415	12.3255	turquoise	magenta	0.136033	0.0651484	0.0708845	-0.677745	705.882	0.0620752	0.489174	0.831375	-0.0871752	0.070702	-0.304242	N	N	N	N
BAG5	ENSG00000166170.9	protein_coding	chr14	103556544	103562831	-		non-IFN			9.02394	8.40321	9.07971	9.41289	darkred	turquoise	0.106414	0.142747	-0.0363331	0.452134	596.505	-0.0190874	0.846177	0.961367	0.0652714	0.194318	-0.0226582	N	N	N	N
BAG6	ENSG00000204463.12	protein_coding	chr6	31639028	31652705	-		non-IFN			24.6399	24.0328	24.4602	25.2269	red	turquoise	0.107274	0.549184	-0.44191	0.663968	1389.81	-0.0355165	0.588295	0.877259	-0.320123	-0.0126093	-0.44711	N	Y	N	N
BAGE2	ENSG00000187172.15	transcribed_unprocessed_pseudogene	chr21	10413477	10516431	+		non-IFN			1.66039	1.60944	1.73413	1.63129	violet	green	0.102405	0.147916	-0.0455105	-0.735195	46.2622	0.146519	0.239219	0.643124	0.0154256	-0.0117086	-0.0368412	N	N	N	N
BAIAP2	ENSG00000175866.15	protein_coding	chr17	81035122	81117432	+		non-IFN			7.26866	7.20631	6.23962	8.22066	yellow	turquoise	0.141824	0.0456162	0.0962077	2.27977	234.809	-0.342878	0.017743	0.161006	-0.11832	0.250609	-0.299226	N	N	N	N
BAIAP2-AS1	ENSG00000226137.5	lincRNA	chr17	81029130	81034881	-		non-IFN			4.20469	4.38709	3.53612	4.66586	brown	turquoise	0.232268	0.0727294	0.159538	2.28375	296.619	-0.350673	0.0213655	0.181296	-0.0574975	0.243854	-0.111388	N	N	N	N
BAK1	ENSG00000030110.12	protein_coding	chr6	33572547	33580293	-		IFN	Hodgkin Disease	Hemic and Lymphatic Diseases;Immune System Diseases;Neoplasms	26.6274	25.4949	27.8044	26.3882	midnightblue	turquoise	0.107265	0.184784	-0.0775189	-0.771626	845.139	0.0659095	0.44998	0.806699	-0.139539	-0.0400795	-0.234019	N	N	N	N
BAK1P1	ENSG00000175730.8	processed_pseudogene	chr20	32690180	32690815	-		non-IFN			3.78281	3.81846	3.99942	3.56651	grey	turquoise	0.145549	0.146448	-0.00089882	-1.23167	27.315	0.142918	0.233917	0.638066	-0.0708696	-0.00135099	-0.243186	N	N	N	N
BANF1	ENSG00000175334.7	protein_coding	chr11	66002079	66004149	+		non-IFN			100.49	98.6358	101.065	101.293	turquoise	black	0.483279	0.118807	0.364471	0.0460054	1253.63	-0.0364975	0.625741	0.89181	-0.013641	-0.00900662	-0.138198	N	Y	N	N
BANF1P3	ENSG00000237758.1	processed_pseudogene	chr2	230725143	230725403	-		non-IFN			46.9501	46.2662	46.5198	47.8126	turquoise	black	0.446774	0.054481	0.392293	0.471386	55.6717	-0.0692268	0.43466	0.797299	-0.0591843	-0.0292715	-0.122804	N	Y	N	N
BANF1P4	ENSG00000223828.1	processed_pseudogene	chr1	174756850	174757119	-		non-IFN			8.05653	8.0812	8.16135	7.94662	salmon	red	0.119505	0.0199604	0.099545	-0.377171	10.4163	-0.0197081	0.868567	0.967257	-0.113993	-0.165497	-0.14183	N	N	N	N
BANK1	ENSG00000153064.11	protein_coding	chr4	101411286	102074812	+	Cytosol;Nucleoplasm;Plasma membrane	non-IFN			2.0134	1.4944	2.34887	2.08375	grey	purple	0.0793573	0.0323634	0.0469939	-0.69182	93.3496	0.117857	0.542195	0.859689	0.195741	0.172702	0.0212745	N	N	N	N
BANP	ENSG00000172530.20	protein_coding	chr16	87949244	88077318	+		non-IFN			5.72753	5.86167	5.72593	5.63424	turquoise	turquoise	0.417256	0.139866	0.27739	-0.188016	192.666	-0.0140223	0.899504	0.976684	-0.0665671	-0.14298	-0.0358034	N	Y	N	N
BAP1	ENSG00000163930.9	protein_coding	chr3	52401013	52410350	-		non-IFN			10.7821	11.0997	11.3728	10.0368	brown	turquoise	0.301938	0.137465	0.164472	-1.45487	408.712	0.0867495	0.309281	0.710223	0.00591599	0.14906	-0.23229	N	N	N	N
BARD1	ENSG00000138376.10	protein_coding	chr2	214725646	214809711	-		non-IFN	Neuroblastoma	Neoplasms	1.56881	1.35839	1.92156	1.40609	greenyellow	grey	0.157715	0.0171808	0.140534	-1.50426	83.6891	0.253728	0.19774	0.59302	-0.147631	-0.172477	-0.130587	N	N	N	N
BASP1	ENSG00000176788.8	protein_coding	chr5	17065598	17276843	+		non-IFN			14.0904	14.8441	12.9603	14.5554	saddlebrown	pink	0.147175	0.0377878	0.109388	1.2327	370.971	-0.170349	0.152715	0.52976	-0.124627	-0.0119338	-0.0691853	N	N	N	N
BATF	ENSG00000156127.6	protein_coding	chr14	75522425	75547015	+		non-IFN			16.2728	13.8772	18.6746	15.8447	royalblue	purple	0.171467	0.0561821	0.115285	-1.59558	165.784	0.215426	0.0889433	0.415341	-0.0541484	-0.232596	-0.0757579	N	N	N	N
BATF2	ENSG00000168062.9	protein_coding	chr11	64987943	64997045	-	Nucleoli	IFN			2.85097	1.66915	5.49725	1.35024	midnightblue	pink	0.359188	0.170483	0.188705	-5.51311	101.454	1.41147	4.60345e-13	6.14751e-11	0.204835	0.0128344	-0.0262904	Y	N	N	N
BATF3	ENSG00000123685.8	protein_coding	chr1	212686418	212699985	-		non-IFN	Leprosy	Bacterial Infections and Mycoses	7.12594	6.05477	8.99507	6.23284	grey60	grey	0.0862146	0.0196734	0.0665412	-2.5235	99.2983	0.392597	0.0217644	0.183987	0.114873	-0.0159868	0.0460082	N	N	N	N
BAX	ENSG00000087088.19	protein_coding	chr19	48954815	48961798	+		IFN			39.055	34.9696	43.4553	38.0562	turquoise	grey	0.397635	0.0250184	0.372617	-1.98216	416.957	0.169258	0.0259328	0.207532	0.251405	0.430291	-0.145462	N	Y	N	N
BAZ1A	ENSG00000198604.10	protein_coding	chr14	34752731	34875647	-		non-IFN			13.0453	12.1095	15.1346	11.8624	midnightblue	grey	0.212498	0.0228706	0.189627	-4.92968	1241.7	0.326015	4.01112e-06	0.000184662	0.14614	-0.129245	-0.00172963	Y	N	N	N
BAZ1B	ENSG00000009954.10	protein_coding	chr7	73440398	73522278	-		non-IFN			4.78557	5.05758	4.99472	4.40903	black	grey	0.150278	0.0207819	0.129496	-1.70685	435.295	0.150045	0.122504	0.482289	0.00300689	0.127894	-0.307702	N	N	N	N
BAZ2A	ENSG00000076108.11	protein_coding	chr12	56595596	56636816	-		non-IFN			5.52691	4.64012	6.22949	5.53296	midnightblue	grey60	0.135332	0.0735137	0.0618185	-1.76614	712.427	0.175135	0.04341	0.280631	0.178115	0.154914	0.0977242	N	N	N	N
BAZ2B	ENSG00000123636.17	protein_coding	chr2	159318979	159616692	-	Cytosol;Nucleoplasm	non-IFN			28.5317	27.9703	29.5214	28.0546	grey	brown	0.100175	0.17718	-0.0770046	-0.758294	1630.53	0.0354706	0.639152	0.896719	-0.0159634	0.21098	-0.326728	N	N	N	N
BBC3	ENSG00000105327.16	protein_coding	chr19	47220822	47232766	-	Cytosol	non-IFN			6.30026	6.42213	6.23573	6.27116	turquoise	turquoise	0.405523	0.115891	0.289631	0.049127	140.131	-0.016281	0.903656	0.978283	-0.0537328	0.0430066	-0.116058	N	Y	N	N
BBIP1	ENSG00000214413.7	protein_coding	chr10	110898730	110919274	-		non-IFN			24.4544	22.4979	26.0508	24.4268	red	blue	0.12359	0.0386831	0.0849074	-1.03462	163.692	0.0639523	0.351362	0.740616	-0.0458367	-0.164596	-0.00276741	N	N	N	N
BBS10	ENSG00000179941.6	protein_coding	chr12	76344474	76348442	-		non-IFN			1.00811	1.18996	0.887572	0.986103	darkmagenta	turquoise	0.105249	0.0769117	0.0283377	0.400073	53.0214	-0.0588434	0.769667	0.939447	-0.273099	-0.143558	-0.32528	N	N	N	N
BBS2	ENSG00000125124.11	protein_coding	chr16	56466836	56520283	-		non-IFN			7.58673	8.09813	7.29499	7.48315	midnightblue	blue	0.14681	0.0835738	0.0632359	0.254224	335.104	-0.0484	0.702942	0.918649	0.154231	0.365444	0.0394356	N	N	N	N
BBS4	ENSG00000140463.13	protein_coding	chr15	72686179	72738476	+		non-IFN			2.26	2.67144	1.86182	2.32091	grey	grey	0.0816746	0.0243683	0.0573064	1.34445	85.7019	-0.219179	0.243875	0.648376	-0.127243	0.099298	-0.239727	N	N	N	N
BBS7	ENSG00000138686.9	protein_coding	chr4	121824440	121870497	-		non-IFN			1.96978	2.00723	2.04965	1.87287	white	yellow	0.173063	0.0698502	0.103213	-0.557732	95.4504	0.133015	0.48316	0.827418	0.136997	-0.0860132	0.314793	N	N	N	N
BBS9	ENSG00000122507.20	protein_coding	chr7	33129244	33606068	+		non-IFN			2.61439	1.88888	2.62539	3.1168	turquoise	red	0.104795	0.0360369	0.068758	1.22073	136.036	-0.133405	0.457858	0.811227	-0.0912089	-0.116861	-0.0084752	N	N	N	N
BBX	ENSG00000114439.18	protein_coding	chr3	107522936	107811324	+		non-IFN			12.0378	11.2283	13.3375	11.4624	greenyellow	pink	0.12921	0.0568389	0.0723708	-1.9183	620.892	0.184226	0.0407224	0.270984	-0.00337358	-0.00855629	-0.174001	N	N	N	N
BCAP29	ENSG00000075790.10	protein_coding	chr7	107579977	107629170	+	Cytosol	non-IFN	Coronary Disease	Cardiovascular Diseases	23.3917	23.0787	23.212	23.7713	midnightblue	blue	0.171216	0.0361557	0.135061	0.331477	670.602	0.0225746	0.798903	0.948043	0.0813326	0.25151	0.0340738	N	N	N	N
BCAP31	ENSG00000185825.15	protein_coding	chrX	153700497	153724697	-		non-IFN			154.885	148.33	158.057	156.714	magenta	blue	0.155578	0.657574	-0.501997	-0.257486	3678.06	0.00541246	0.896255	0.976052	-0.032269	0.27245	-0.305972	N	Y	N	N
BCAP31P1	ENSG00000261217.2	unprocessed_pseudogene	chr16	33988406	33991551	-		non-IFN			18.9821	17.6939	19.6996	19.2583	magenta	blue	0.0897968	0.22047	-0.130673	-0.494068	59.7207	0.0242236	0.706825	0.919267	-0.111157	0.0234172	-0.261174	N	N	N	N
BCAP31P2	ENSG00000260047.2	unprocessed_pseudogene	chr16	32869985	32873128	+		non-IFN			14.0871	13.6565	14.1921	14.2984	salmon	blue	0.0602841	0.234555	-0.174271	0.141331	46.9528	-0.0192584	0.783176	0.942044	-0.155625	0.097947	-0.445034	N	N	N	N
BCAS2	ENSG00000116752.5	protein_coding	chr1	114567557	114581639	-	Centrosome	non-IFN			22.9132	23.1372	22.801	22.8542	turquoise	grey	0.263707	0.0306237	0.233083	0.0295574	427.733	-0.0235505	0.814533	0.953102	0.0438076	0.0364768	0.0261174	N	N	N	N
BCAS2P2	ENSG00000234332.1	processed_pseudogene	chr1	100393033	100394026	-		non-IFN			2.02703	2.23497	1.87015	2.01868	brown	yellow	0.203616	0.0450461	0.15857	0.463085	16.8483	-0.119205	0.504149	0.840557	-0.0564952	0.113483	-0.174693	N	N	N	N
BCAS3	ENSG00000141376.21	protein_coding	chr17	60677453	61392838	+		non-IFN			16.7686	18.182	16.7785	15.7623	darkgreen	black	0.158952	0.0412104	0.117742	-0.501913	316.939	-0.0808294	0.53206	0.854862	0.102332	-0.0698013	0.341775	N	N	N	N
BCAT1	ENSG00000060982.14	protein_coding	chr12	24810022	24949459	-		non-IFN			4.42376	3.529	4.25571	5.20364	grey60	greenyellow	0.157872	0.0578318	0.10004	0.913737	263.034	-0.239082	0.236882	0.640499	-0.182371	-0.106853	-0.100665	N	N	N	N
BCAT2	ENSG00000105552.14	protein_coding	chr19	48795062	48811029	-		non-IFN			6.13846	5.51937	6.25484	6.47277	grey	pink	0.198616	0.0334052	0.16521	0.369087	138.511	-0.0297486	0.809743	0.951719	-0.132425	-0.247682	-0.0678016	N	N	N	N
BCCIP	ENSG00000107949.16	protein_coding	chr10	125823546	125853695	+	Cytosol	non-IFN			54.7033	51.4687	60.3327	52.0195	darkgreen	blue	0.342226	0.100825	0.241401	-2.73318	1070.42	0.172474	0.00605133	0.0757051	0.097516	0.178106	-0.255294	N	N	N	N
BCDIN3D	ENSG00000186666.5	protein_coding	chr12	49836039	49843129	-		non-IFN			1.01062	0.940121	1.1891	0.90291	cyan	grey	0.216483	0.0221404	0.194342	-1.24854	29.3169	0.292163	0.126049	0.488163	0.114946	0.200848	-0.00363223	N	N	N	N
BCKDHA	ENSG00000248098.11	protein_coding	chr19	41397460	41425005	+		non-IFN			27.2368	29.0013	29.0688	24.3747	turquoise	brown	0.336652	0.150568	0.186084	-1.52235	34.987	0.0712414	0.506844	0.842632	-0.126094	-0.0306225	-0.317042	N	N	N	N
BCKDHB	ENSG00000083123.14	protein_coding	chr6	80106647	80346270	+		non-IFN			3.79465	4.07462	3.94308	3.46607	turquoise	blue	0.169029	0.0403717	0.128658	-0.82907	104.839	0.0254894	0.871723	0.968315	-0.0368894	0.0920927	-0.221566	N	N	N	N
BCKDK	ENSG00000103507.13	protein_coding	chr16	31106107	31112791	+		non-IFN			70.624	70.8324	68.6493	72.2192	red	turquoise	0.175073	0.476779	-0.301707	1.03458	2186.66	-0.077665	0.257886	0.662445	-0.191536	0.167748	-0.440364	N	Y	N	N
BCL10	ENSG00000142867.12	protein_coding	chr1	85266248	85277090	-	Nucleoplasm	non-IFN			16.8267	15.7262	16.9786	17.4695	skyblue	blue	0.105212	0.0310544	0.0741575	0.3903	585.379	0.0592168	0.44355	0.802901	0.1468	0.157391	0.184379	N	N	N	N
BCL11A	ENSG00000119866.20	protein_coding	chr2	60451167	60553567	-		non-IFN			21.0999	20.6719	24.0477	18.8011	lightgreen	green	0.252673	0.0717365	0.180936	-2.48888	412.022	0.337965	0.00297952	0.0449623	0.342101	0.308927	0.271206	Y	N	N	N
BCL2A1	ENSG00000140379.7	protein_coding	chr15	79960889	79971446	-		non-IFN			89.9239	86.1953	104.897	79.3439	yellow	grey	0.242382	0.0173764	0.225005	-2.42027	1062.65	0.343725	0.00815733	0.0944593	0.159047	0.168199	-0.037533	N	N	N	N
BCL2L1	ENSG00000171552.12	protein_coding	chr20	31664452	31723989	-	Mitochondria	non-IFN			6.18673	6.38845	6.66987	5.61803	darkorange	turquoise	0.218107	0.174334	0.0437723	-1.43911	220.623	0.223382	0.0899121	0.417993	-0.117146	-0.124291	-0.190087	N	N	N	N
BCL2L11	ENSG00000153094.21	protein_coding	chr2	111119378	111168447	+		non-IFN			8.32465	7.80666	9.42952	7.7154	darkred	lightgreen	0.0992677	0.0382717	0.060996	-1.73817	356.132	0.196802	0.139256	0.510738	0.210995	0.308026	0.0496404	N	N	N	N
BCL2L12	ENSG00000126453.9	protein_coding	chr19	49665142	49673916	+	Cytosol	non-IFN			4.33941	4.94263	4.21893	4.0199	violet	black	0.101439	0.108815	-0.00737582	-0.445898	42.8522	-0.0719306	0.651459	0.900092	0.0950225	0.0803841	0.101529	N	N	N	N
BCL2L13	ENSG00000099968.17	protein_coding	chr22	17628855	17730855	+		non-IFN			20.3845	20.4629	21.5198	19.3274	red	darkgreen	0.209131	0.140139	0.0689922	-1.3095	965.548	0.141287	0.177643	0.56711	-0.193125	-0.0634967	-0.478762	N	N	N	N
BCL2L2	ENSG00000129473.9	protein_coding	chr14	23298790	23311759	+		non-IFN			0.76332	0.801254	0.708163	0.785211	cyan	yellow	0.130719	0.0282913	0.102428	0.496457	41.3794	-0.107655	0.597004	0.881138	-0.0327335	0.000675496	0.0268093	N	N	N	N
BCL3	ENSG00000069399.13	protein_coding	chr19	44747705	44760044	+	Midbody;Vesicles	non-IFN			24.9612	23.5167	25.6367	25.3847	black	tan	0.0912666	0.0572816	0.033985	-0.0561056	795.31	0.00879357	0.96306	0.992589	0.0162812	0.0596689	-0.0503323	N	N	N	N
BCL6	ENSG00000113916.17	protein_coding	chr3	187721377	187745727	-		non-IFN			40.6162	34.2775	42.7342	43.2217	darkmagenta	darkturquoise	0.171234	0.0286346	0.1426	0.119317	1351.43	-0.0191301	0.8728	0.96875	-0.026133	0.0547152	-0.0710879	N	N	N	N
BCL7B	ENSG00000106635.7	protein_coding	chr7	73536356	73558002	-	Nucleoplasm	non-IFN			56.1781	48.3914	62.8269	55.808	darkred	lightyellow	0.208764	0.185708	0.0230559	-1.78821	1155.07	0.15544	0.0883525	0.41388	0.0283576	0.158517	-0.231598	N	N	N	N
BCL7C	ENSG00000099385.11	protein_coding	chr16	30833626	30894960	-	Nucleoplasm	non-IFN			8.09561	7.87602	7.93593	8.3915	black	red	0.245078	0.0282523	0.216826	0.752546	164.522	-0.120559	0.262572	0.667472	-0.0635357	-0.0281457	-0.102221	N	N	N	N
BCLAF1	ENSG00000029363.15	protein_coding	chr6	136256863	136289851	-		non-IFN			33.6332	33.2012	30.9889	36.2714	skyblue	magenta	0.135604	0.210703	-0.0750992	2.26412	1799.09	-0.174602	0.0485582	0.301168	-0.0878353	0.0335497	-0.0240419	N	N	N	N
BCLAF1P1	ENSG00000248966.1	processed_pseudogene	chr5	110948029	110950780	-		non-IFN			2.05769	2.04352	1.87625	2.22779	skyblue	magenta	0.130869	0.186948	-0.0560792	2.42288	88.1457	-0.233646	0.0219564	0.185077	-0.146384	0.117086	-0.167774	N	N	N	N
BCLAF1P2	ENSG00000279800.2	processed_pseudogene	chr16	34266041	34268649	-		non-IFN			14.5026	14.5548	13.1377	15.6701	skyblue	magenta	0.156069	0.209387	-0.0533175	2.54068	584.741	-0.242913	0.0158827	0.149474	-0.0951692	0.0382781	-0.0051889	N	N	N	N
BCOR	ENSG00000183337.16	protein_coding	chrX	40049815	40177329	-		non-IFN			3.17261	2.96767	3.12299	3.36106	turquoise	tan	0.0971192	0.0544925	0.0426267	0.847724	326.04	-0.128923	0.262781	0.667719	-0.0303133	0.0833112	-0.0243878	N	N	N	N
BCR	ENSG00000186716.19	protein_coding	chr22	23179704	23318037	+	Cytosol;Nucleoplasm	non-IFN			0.75052	0.891839	0.639227	0.748965	midnightblue	purple	0.130228	0.0172684	0.112959	0.967823	57.142	-0.142938	0.443754	0.802901	0.119713	0.443351	-0.0601912	N	N	N	N
BCS1L	ENSG00000074582.12	protein_coding	chr2	218658764	218663443	+		non-IFN			10.2652	10.7192	9.61797	10.5157	turquoise	grey	0.214319	0.0355617	0.178757	1.02743	229.931	-0.135217	0.263538	0.66809	-0.102185	-0.292265	0.100492	N	N	N	N
BCYRN1	ENSG00000236824.2	scRNA	chr2	47335315	47335514	+		non-IFN			59.9551	58.5775	56.3097	64.1439	lightgreen	green	0.235189	0.045934	0.189255	1.44397	29.7166	-0.196031	0.105787	0.452181	0.159658	0.25151	0.20721	N	N	N	N
BDH1	ENSG00000161267.11	protein_coding	chr3	197509783	197573323	-		non-IFN			1.09727	1.23538	1.0145	1.0728	grey	grey	0.0750177	0.0230423	0.0519755	0.232239	39.3085	-0.0912483	0.636908	0.895433	-0.0457633	0.178781	-0.154629	N	N	N	N
BDH2	ENSG00000164039.14	protein_coding	chr4	103079435	103099883	-		non-IFN	Testicular Germ Cell Tumor	Neoplasms	5.41219	4.64203	6.03188	5.40904	brown	grey	0.179509	0.0148027	0.164706	-0.788963	90.1268	0.0862682	0.596317	0.880409	0.232777	0.150185	0.257369	N	N	N	N
BDP1	ENSG00000145734.18	protein_coding	chr5	71455615	71567820	+		non-IFN			9.8343	10.0203	9.94149	9.60839	blue	grey	0.213048	0.0240499	0.188998	-0.587515	594.623	0.0553947	0.507291	0.842632	0.016819	-0.00743046	0.0349386	N	N	N	N
BECN1	ENSG00000126581.12	protein_coding	chr17	42810134	42833350	-		non-IFN			88.9396	90.2516	89.0819	87.888	red	brown	0.244709	0.477647	-0.232938	-0.283788	2324.36	-0.00416644	0.947865	0.988504	-0.142301	0.137126	-0.423933	N	N	N	N
BEST1	ENSG00000167995.15	protein_coding	chr11	61949821	61965515	+		non-IFN	Eicosapentaenoic Acid	Chemicals and Drugs Category	81.5446	89.4471	78.4922	78.6598	darkred	magenta	0.140522	0.14397	-0.00344764	0.034977	1481.05	0.0535195	0.666462	0.906032	0.00765167	0.125192	-0.0594993	N	N	N	N
BET1	ENSG00000105829.11	protein_coding	chr7	93962762	94004382	-		non-IFN			11.3113	11.1713	11.4474	11.29	white	yellow	0.285012	0.0805728	0.204439	-0.121633	237.991	0.00364467	0.980665	0.995224	-0.181587	-0.170675	-0.195448	N	N	N	N
BET1L	ENSG00000177951.17	protein_coding	chr11	167784	207428	-	Golgi apparatus;Nucleus	non-IFN	Menarche	Other	17.949	18.0587	19.2664	16.7092	brown	turquoise	0.186403	0.232689	-0.0462859	-1.94705	575.037	0.148236	0.116977	0.472559	-0.0669827	-0.0252185	-0.254602	N	N	N	N
BEX3	ENSG00000166681.13	protein_coding	chrX	103376340	103378077	+		non-IFN			2.40781	1.9461	2.87705	2.31968	brown	purple	0.13506	0.0444962	0.0905639	-0.97019	24.8856	0.201377	0.326503	0.722507	0.0300625	0.0329475	-0.0136687	N	N	N	N
BEX4	ENSG00000102409.9	protein_coding	chrX	103215092	103217246	+	Cytosol;Nucleus	non-IFN			22.5097	22.6353	22.2088	22.6865	brown	blue	0.121565	0.0600438	0.0615213	0.257962	407.806	-0.0204681	0.859149	0.964935	-0.0800614	0.0479603	-0.194584	N	N	N	N
BFAR	ENSG00000103429.10	protein_coding	chr16	14632815	14669236	+		non-IFN			13.1152	11.9103	14.49	12.7527	greenyellow	tan	0.27621	0.0387488	0.237461	-1.50636	357.186	0.137259	0.204854	0.601895	0.0188969	0.0929934	-0.105335	N	N	N	N
BHLHE40	ENSG00000134107.4	protein_coding	chr3	4979116	4985323	+		non-IFN			12.518	11.9053	12.5322	12.938	steelblue	magenta	0.213897	0.107248	0.106649	0.203861	704.202	-0.0275017	0.865287	0.966111	0.0394073	0.208728	-0.0759309	N	N	N	N
BHLHE40-AS1	ENSG00000235831.6	antisense	chr3	4896809	4979961	-		non-IFN			0.926786	0.902155	0.96537	0.910126	grey	turquoise	0.0756558	0.0454918	0.030164	-0.552089	31.695	0.0881484	0.508109	0.843075	0.0183347	-0.105603	0.135257	N	N	N	N
BICD1	ENSG00000151746.13	protein_coding	chr12	32106835	32383633	+	Vesicles	non-IFN			1.27193	1.39063	1.32465	1.14161	blue	grey	0.112342	0.0332086	0.0791329	-0.730712	37.848	-0.0721616	0.724105	0.925041	-0.108763	-0.052355	-0.178498	N	N	N	N
BICD2	ENSG00000185963.13	protein_coding	chr9	92711363	92764812	-	Cytosol	non-IFN	Body Height	Body Weights and Measures;Diagnostic Techniques and Procedures;Physical Examination	14.4766	13.8624	13.1938	16.042	grey	yellow	0.160499	0.336189	-0.175691	2.66436	1223.52	-0.29061	0.00221721	0.0356515	-0.452524	-0.27155	-0.496231	Y	N	N	N
BID	ENSG00000015475.18	protein_coding	chr22	17734138	17774770	-		IFN			319.345	322.8	323.638	313.118	pink	turquoise	0.193994	0.17775	0.0162443	-0.798239	3514.29	0.0163489	0.744784	0.931568	0.0379405	0.19049	-0.146154	N	N	N	N
BIK	ENSG00000100290.2	protein_coding	chr22	43110748	43129712	+		non-IFN			1.18715	1.04688	1.33997	1.15132	grey	grey	0.119363	0.0246424	0.094721	-0.590418	15.9044	0.086342	0.673215	0.9076	0.0128066	-0.0394364	0.0250666	N	N	N	N
BIN1	ENSG00000136717.14	protein_coding	chr2	127048027	127107355	-		non-IFN	Alzheimer Disease	Mental Disorders;Nervous System Diseases	5.21766	4.44621	6.60972	4.53392	pink	purple	0.120068	0.0214619	0.0986061	-2.17362	170.125	0.40319	0.0257538	0.206496	0.21674	0.222689	0.00882112	N	N	N	N
BIN2	ENSG00000110934.10	protein_coding	chr12	51281038	51324668	-		non-IFN			207.754	206.171	216.509	201.145	red	blue	0.270298	0.379391	-0.109093	-1.57665	7172.57	0.0954643	0.154105	0.532347	-0.0698429	0.0628212	-0.380865	N	N	N	N
BIN2P1	ENSG00000234568.3	processed_pseudogene	chr4	82275071	82276600	+		non-IFN			12.6728	12.824	13.0883	12.1995	red	blue	0.240542	0.484171	-0.243629	-1.33136	279.757	0.0899235	0.22491	0.630867	-0.06048	0.0995231	-0.413036	N	N	N	N
BIN2P2	ENSG00000248684.1	processed_pseudogene	chr5	75910565	75911867	+		non-IFN			2.11413	2.08788	2.19743	2.05915	purple	turquoise	0.228772	0.123078	0.105694	-0.812485	39.0278	0.0891928	0.382564	0.765843	-0.264019	-0.170901	-0.413728	N	N	N	N
BIN3	ENSG00000147439.11	protein_coding	chr8	22620418	22669148	-		non-IFN			30.024	28.6493	29.5543	31.4087	brown	turquoise	0.129483	0.256623	-0.12714	0.896695	261.155	-0.0651728	0.469388	0.817726	-0.269837	0.0139603	-0.498134	N	N	N	N
BIRC2	ENSG00000110330.8	protein_coding	chr11	102347211	102378670	+		non-IFN			22.8288	23.1449	22.1987	23.1616	blue	blue	0.17765	0.213374	-0.0357232	0.523545	1155.98	-0.0411471	0.687839	0.91151	-0.12118	0.0238675	-0.160683	N	N	N	N
BIRC3	ENSG00000023445.13	protein_coding	chr11	102317450	102339403	+		non-IFN			3.99806	3.77314	4.46459	3.74517	midnightblue	grey	0.0960253	0.0471932	0.0488321	-1.33754	329.449	0.193868	0.194987	0.589769	0.0569842	0.0569669	-0.0575967	N	N	N	N
BIRC6	ENSG00000115760.13	protein_coding	chr2	32357028	32618899	+	Mitotic spindle	non-IFN			3.87926	3.59757	4.15307	3.8365	lightgreen	green	0.153572	0.0720629	0.0815092	-1.33693	1045.63	0.0996465	0.208832	0.607544	0.160318	0.217285	-0.0185071	N	N	N	N
BISPR	ENSG00000282851.1	lincRNA	chr19	17405694	17418904	+		IFN			25.0098	19.084	39.1128	16.7488	green	blue	0.221025	0.0800594	0.140966	-9.15513	537.307	1.11943	6.70929e-32	2.91505e-29	0.351977	0.16302	0.107583	Y	N	N	N
BLCAP	ENSG00000166619.12	protein_coding	chr20	37492472	37527931	-	Nucleoli	non-IFN			30.0929	30.0683	28.6632	31.3717	lightyellow	blue	0.263105	0.479302	-0.216196	1.50578	928.136	-0.134409	0.0924489	0.422856	-0.142155	0.173152	-0.404388	N	N	N	N
BLM	ENSG00000197299.10	protein_coding	chr15	90717327	90816165	+	Cytosol	non-IFN			0.88031	0.939353	0.969974	0.759518	purple	grey	0.104251	0.0336509	0.0706003	-1.60892	71.9721	0.259178	0.102878	0.446238	-0.103554	-0.101099	-0.253045	N	N	N	N
BLMH	ENSG00000108578.14	protein_coding	chr17	30248195	30292056	-	Nuclear bodies;Nucleoplasm	non-IFN	Electrocardiography	Diagnostic Techniques and Procedures	5.27817	5.3723	5.142	5.33188	darkturquoise	grey	0.142099	0.0209368	0.121162	0.345847	193.049	-0.0450359	0.783344	0.942044	0.170121	0.283709	0.0868275	N	N	N	N
BLNK	ENSG00000095585.16	protein_coding	chr10	96191702	96271587	-		non-IFN			1.27866	0.557196	2.37182	0.823374	green	purple	0.173486	0.0601397	0.113346	-3.65793	35.0856	0.763307	0.000216676	0.00583069	0.308051	0.176952	0.161818	Y	N	N	N
BLOC1S1	ENSG00000135441.7	protein_coding	chr12	55716037	55720087	+		non-IFN			238.501	202.425	279.496	227.795	green	black	0.181341	0.131183	0.0501573	-4.16542	555.776	0.234508	0.00083766	0.0171012	0.204493	-0.0731788	0.100146	Y	N	N	N
BLOC1S2	ENSG00000196072.11	protein_coding	chr10	100273280	100286712	-		non-IFN			72.6175	68.0142	79.8188	69.5128	darkolivegreen	blue	0.234517	0.106847	0.12767	-2.91805	1375.24	0.193643	0.00141534	0.0251637	0.0846084	0.238225	-0.233154	Y	N	N	N
BLOC1S2P1	ENSG00000236982.1	processed_pseudogene	chrX	64726748	64727048	-		non-IFN			10.2705	8.94674	11.2669	10.3256	blue	blue	0.218862	0.0412198	0.177642	-1.20273	18.3641	0.103339	0.320384	0.718707	0.0882264	0.111907	-0.0178152	N	N	N	N
BLOC1S3	ENSG00000189114.6	protein_coding	chr19	45178745	45181801	+	Golgi apparatus	non-IFN			7.21408	7.45977	7.35178	6.91915	grey	grey	0.0919338	0.0384192	0.0535146	-0.668673	279.235	0.0520032	0.658077	0.902813	0.158265	0.194543	0.111388	N	N	N	N
BLOC1S4	ENSG00000186222.4	protein_coding	chr4	6716055	6717671	+	Cytosol;Vesicles	non-IFN			17.7996	16.9757	17.9707	18.2302	black	red	0.164445	0.0686837	0.0957617	0.168652	430.582	-0.0328047	0.790247	0.945097	-0.203319	-0.214808	-0.17919	N	N	N	N
BLOC1S5	ENSG00000188428.18	protein_coding	chr6	8013567	8064414	-		non-IFN			10.1453	10.6715	10.4744	9.48352	paleturquoise	yellow	0.1281	0.144093	-0.0159927	-0.682602	239.548	0.126592	0.343353	0.734347	-0.0776901	-0.0621457	-0.135603	N	N	N	N
BLOC1S6	ENSG00000104164.10	protein_coding	chr15	45587123	45615999	+		non-IFN			38.0902	37.3857	39.5321	37.3152	darkred	magenta	0.152598	0.0519404	0.100658	-1.16927	1368.23	0.052004	0.436243	0.798101	-0.0321223	0.0249934	-0.162585	N	N	N	N
BLVRA	ENSG00000106605.10	protein_coding	chr7	43758680	43807342	+		non-IFN			221.138	172.255	323.012	165.753	green	grey	0.595536	0.039697	0.555839	-9.30938	3514.08	0.900976	9.85248e-27	3.21052e-24	0.386959	0.42894	0.0115885	Y	Y	Y	Y
BLVRB	ENSG00000090013.9	protein_coding	chr19	40447789	40465840	-	Nucleoplasm;Plasma membrane	non-IFN			219.98	209.71	227.96	220.189	darkred	grey	0.137929	0.0621011	0.0758274	-0.829555	2481.71	0.0370458	0.580315	0.874202	-0.122182	-0.0549404	-0.291443	N	N	N	N
BLZF1	ENSG00000117475.13	protein_coding	chr1	169367970	169396540	+		non-IFN			9.196	7.44291	12.3363	7.66264	brown	yellow	0.105278	0.149353	-0.0440747	-4.47133	348.743	0.657206	2.27223e-07	1.40199e-05	0.037036	0.0837616	-0.395048	Y	N	N	N
BMF	ENSG00000104081.13	protein_coding	chr15	40087890	40108892	-	Nucleoplasm	non-IFN			3.81044	3.74944	3.86336	3.80681	turquoise	turquoise	0.401719	0.045773	0.355946	-0.12433	235.817	-0.0343376	0.780927	0.942044	0.038185	0.207603	-0.125744	N	Y	N	N
BMI1	ENSG00000168283.13	protein_coding	chr10	22321211	22331484	+	Cytosol;Nuclear bodies;Nucleoli;Nucleus	non-IFN			3.69563	3.91393	3.57542	3.64761	darkred	blue	0.0989615	0.0539345	0.045027	0.19171	142.218	-0.0140657	0.915668	0.982318	0.0379161	0.0186887	0.0793901	N	N	N	N
BMP1	ENSG00000168487.17	protein_coding	chr8	22164736	22212326	+		non-IFN			0.775461	0.60301	0.952368	0.741098	grey	turquoise	0.0832363	0.0389151	0.0443212	-1.29259	45.0896	0.113236	0.576496	0.873363	-0.250995	-0.293198	-0.298992	N	N	N	N
BMP2K	ENSG00000138756.17	protein_coding	chr4	78776342	78916372	+		non-IFN			8.26484	8.54475	7.83702	8.44475	greenyellow	red	0.119803	0.18558	-0.0657773	0.844549	467.409	-0.106184	0.311518	0.711422	-0.101867	0.0956953	-0.13076	N	N	N	N
BMPR2	ENSG00000204217.12	protein_coding	chr2	202376936	202567751	+	Nucleoplasm;Plasma membrane	non-IFN			1.59651	1.52869	1.87143	1.4018	green	turquoise	0.194765	0.0498564	0.144908	-2.64971	304.501	0.362008	0.00373793	0.0532943	0.193639	0.371748	-0.159126	N	N	N	N
BMS1	ENSG00000165733.7	protein_coding	chr10	42782801	42834937	+		non-IFN			2.96338	3.11129	2.93673	2.88249	turquoise	turquoise	0.143098	0.0554501	0.0876476	-0.252845	374.643	0.0163579	0.872618	0.96875	-0.0242262	0.117536	-0.198216	N	N	N	N
BMS1P1	ENSG00000204177.10	transcribed_unprocessed_pseudogene	chr10	46786674	46811989	+		non-IFN			1.99429	1.95923	2.11987	1.90822	black	grey	0.0796901	0.0358392	0.0438509	-1.11377	102.145	-0.0369665	0.757875	0.934978	0.23994	0.237775	0.215166	N	N	N	N
BMS1P15	ENSG00000258780.1	unprocessed_pseudogene	chr15	20153776	20160826	+		non-IFN			1.54608	1.59212	1.50553	1.54937	grey	greenyellow	0.0993361	0.0206665	0.0786696	0.250849	24.34	-0.0364368	0.80147	0.948942	-0.191561	-0.0360265	-0.318079	N	N	N	N
BMS1P16	ENSG00000258684.2	unprocessed_pseudogene	chr15	21160305	21167357	+		non-IFN			1.32795	1.26432	1.30492	1.39318	pink	grey	0.108775	0.0307215	0.0780536	0.620688	21.4184	-0.0875845	0.515613	0.846968	-0.167041	-0.140278	-0.107756	N	N	N	N
BMS1P2	ENSG00000251079.6	transcribed_unprocessed_pseudogene	chr10	47538377	47551954	-		non-IFN			1.07215	1.18886	0.939763	1.10658	pink	blue	0.0546151	0.0299497	0.0246653	1.03182	7.94219	-0.202422	0.290942	0.694648	-0.0501881	0.131722	-0.113291	N	N	N	N
BMS1P20	ENSG00000236850.4	processed_transcript	chr22	22303224	22322847	+		non-IFN			1.61122	1.85522	1.41158	1.61514	brown	grey	0.0847781	0.0299747	0.0548034	0.966383	2.92382	-0.0335982	0.869095	0.967257	-0.165672	-0.0603444	-0.128512	N	N	N	N
BMS1P21	ENSG00000283101.1	transcribed_unprocessed_pseudogene	chr10	79906605	79907856	+		non-IFN			1.20948	1.19941	1.19214	1.23188	black	grey	0.131678	0.0484257	0.0832521	0.192003	3.48831	-0.00621564	0.97281	0.994213	0.139301	0.323711	-0.0185071	N	N	N	N
BMS1P4	ENSG00000242338.6	transcribed_unprocessed_pseudogene	chr10	73715843	73730469	-		non-IFN			1.8584	1.84769	1.93591	1.79756	turquoise	brown	0.119268	0.0600425	0.0592251	-0.646432	33.1257	0.132644	0.300648	0.70268	0.0307045	-0.0204901	0.0224852	N	N	N	N
BMS1P7	ENSG00000270025.2	transcribed_unprocessed_pseudogene	chr10	48050282	48060016	-		non-IFN			2.12064	2.12734	2.22868	2.02058	greenyellow	blue	0.0586302	0.0395127	0.0191175	-0.795804	33.0188	0.113574	0.423064	0.793242	0.104874	0.0983973	0.1401	N	N	N	N
BMT2	ENSG00000164603.11	protein_coding	chr7	112819147	112939916	-	Cytosol	non-IFN			5.50451	5.55964	5.77218	5.22941	turquoise	blue	0.128698	0.182642	-0.0539435	-1.20333	346.853	0.135343	0.248135	0.65172	-0.178824	0.00630463	-0.418398	N	N	N	N
BNIP1	ENSG00000113734.17	protein_coding	chr5	173144442	173164387	+		non-IFN			6.73494	7.19937	6.48278	6.6296	brown	grey	0.184063	0.0210796	0.162984	0.17993	104.981	-0.053003	0.7009	0.917856	0.00332469	0.0389536	-0.0122804	N	N	N	N
BNIP2	ENSG00000140299.11	protein_coding	chr15	59659146	59689534	-		non-IFN			102.418	97.7483	104.163	104.175	pink	lightyellow	0.418995	0.336715	0.0822797	0.00183729	4158.21	-0.0207499	0.800375	0.948575	-0.0336625	0.289112	-0.324133	N	N	N	N
BNIP3	ENSG00000176171.11	protein_coding	chr10	131966455	131982013	-		non-IFN			1.84428	1.75849	1.97954	1.78548	turquoise	grey	0.109423	0.0315157	0.0779077	-0.898563	87.213	0.110316	0.447677	0.805269	0.151395	0.155364	0.0672827	N	N	N	N
BNIP3L	ENSG00000104765.15	protein_coding	chr8	26382898	26505636	+		non-IFN			198.245	199.631	193.996	201.016	turquoise	blue	0.379955	0.562517	-0.182562	0.672231	4790.56	-0.0707099	0.2247	0.630617	-0.107221	0.155139	-0.300783	N	N	N	N
BNIP3P37	ENSG00000270479.1	processed_pseudogene	chr19	23123188	23124088	-		non-IFN			0.825969	0.878551	0.753101	0.853147	brown	grey	0.185739	0.0312149	0.154524	1.03198	9.47263	-0.15887	0.284431	0.689685	0.020926	0.0522384	0.189222	N	N	N	N
BOD1	ENSG00000145919.10	protein_coding	chr5	173607514	173616660	-		non-IFN			11.5549	11.2368	11.5573	11.7773	grey	turquoise	0.175235	0.0517194	0.123515	0.242343	239.549	-0.0175475	0.863152	0.965648	-0.165819	-0.0472848	-0.27259	N	N	N	N
BOD1L1	ENSG00000038219.12	protein_coding	chr4	13568738	13627723	-		non-IFN			2.53146	2.4334	2.67783	2.47152	salmon	pink	0.202497	0.0438303	0.158667	-0.893103	456.274	0.0809344	0.490071	0.831695	-0.0756122	-0.112808	-0.108967	N	N	N	N
BOLA1	ENSG00000178096.8	protein_coding	chr1	149887890	149900798	+		non-IFN			5.98547	5.85846	5.26397	6.71173	blue	turquoise	0.234364	0.0332154	0.201148	1.79522	68.6737	-0.279123	0.0940064	0.426011	-0.0427076	-0.201523	0.234192	N	N	N	N
BOLA2B	ENSG00000169627.7	protein_coding	chr16	30192934	30194306	-		non-IFN			13.7005	12.6739	14.6429	13.5937	grey	black	0.123016	0.051049	0.071967	-1.33411	190.156	0.085857	0.333204	0.727479	0.00875175	-0.19747	0.084406	N	N	N	N
BOLA3	ENSG00000163170.11	protein_coding	chr2	74135398	74147994	-		non-IFN			8.38805	7.86678	8.92092	8.28583	blue	black	0.179799	0.0240347	0.155764	-0.598478	43.1402	0.119815	0.449993	0.806699	0.184618	0.0839867	0.247856	N	N	N	N
BOP1	ENSG00000261236.6	protein_coding	chr8	144262102	144291370	-		non-IFN			11.1242	11.3464	11.9257	10.2603	salmon	blue	0.264415	0.0854826	0.178933	-1.85479	390.011	0.200519	0.0507742	0.308169	-0.0287488	-0.194993	-0.0261174	N	N	N	N
BORA	ENSG00000136122.15	protein_coding	chr13	72727749	72756198	+	Nucleoli;Nucleus	non-IFN			2.50872	2.47368	2.64227	2.4156	white	blue	0.142606	0.0532518	0.089354	-0.499504	62.1197	0.0500457	0.797062	0.94792	-0.254143	-0.253086	-0.322749	N	N	N	N
BORCS5	ENSG00000165714.10	protein_coding	chr12	12357079	12469694	+		non-IFN			4.56769	4.19524	4.98281	4.46432	cyan	yellow	0.132281	0.0337236	0.0985576	-0.773896	75.9946	-0.0393297	0.775498	0.941113	0.0308511	0.0481854	-0.0624397	N	N	N	N
BORCS6	ENSG00000196544.7	protein_coding	chr17	8188333	8190907	-		non-IFN			3.77577	4.16406	3.68661	3.58034	purple	turquoise	0.138907	0.0357124	0.103194	-0.334889	129.931	0.0351635	0.76425	0.937555	-0.0207304	0.139152	-0.136987	N	N	N	N
BORCS7	ENSG00000166275.15	protein_coding	chr10	102854223	102864961	+	Cytosol;Nuclear speckles	non-IFN	Arsenic	Chemicals and Drugs Category	32.9062	33.0666	32.4804	33.1686	pink	blue	0.10874	0.0677911	0.0409488	0.372982	455.498	0.0444875	0.572808	0.872282	-0.100352	-0.100874	-0.0103778	N	N	N	N
BORCS8	ENSG00000254901.7	protein_coding	chr19	19176903	19192591	-	Nucleoplasm;Vesicles	non-IFN			28.3606	27.464	30.1227	27.4386	turquoise	turquoise	0.270992	0.0489716	0.22202	-1.49134	289.007	0.107998	0.223555	0.629104	-0.125434	0.0403046	-0.395913	N	N	N	N
bP-21264C1.2	ENSG00000278932.3	lincRNA	chr21	9325013	9368775	+		non-IFN			2.44329	2.79841	2.16374	2.43928	violet	grey	0.145363	0.0160301	0.129333	0.727334	16.2507	-0.159451	0.387163	0.768518	-0.0058182	-0.0508874	0.110869	N	N	N	N
BPGM	ENSG00000172331.11	protein_coding	chr7	134646808	134679813	+	Nucleoli	non-IFN			12.7583	11.9458	14.1372	12.1152	darkolivegreen	blue	0.169473	0.117607	0.0518658	-1.72563	341.856	0.19764	0.0944987	0.427069	-0.148486	0.0873642	-0.511625	N	N	N	N
BPHL	ENSG00000137274.12	protein_coding	chr6	3118374	3153578	+		non-IFN			3.81318	4.2173	3.35321	3.93377	turquoise	grey	0.214569	0.024859	0.18971	1.12188	56.7068	-0.179129	0.324778	0.721401	-0.106318	-0.279011	0.1996	N	N	N	N
BPI	ENSG00000101425.12	protein_coding	chr20	38260149	38337505	+		non-IFN			5.97244	4.22001	8.41986	5.04995	yellow	grey	0.222293	0.0263677	0.195925	-2.55821	163.597	0.512877	0.00548553	0.070705	0.0334424	0.201073	-0.348002	N	N	N	N
BPNT1	ENSG00000162813.17	protein_coding	chr1	220057482	220090462	-	Nuclear speckles	non-IFN			5.61588	5.52721	5.77749	5.53586	brown	grey	0.160919	0.023174	0.137745	-0.376952	173.266	0.00989791	0.936116	0.986243	0.0395784	0.159192	-0.14183	N	N	N	N
BPTF	ENSG00000171634.16	protein_coding	chr17	67825524	67984378	+		non-IFN			4.66317	4.45417	5.04438	4.47435	salmon	red	0.250483	0.0349357	0.215547	-1.2382	445.625	0.172543	0.0713979	0.37309	0.0390406	-0.157616	0.130933	N	N	N	N
BRAF	ENSG00000157764.12	protein_coding	chr7	140719327	140924764	-	Cytosol;Vesicles	non-IFN			2.79162	2.61783	2.8361	2.87506	darkred	green	0.136852	0.0665852	0.0702666	0.129693	121.666	-0.0422979	0.749052	0.932443	0.164768	0.0515629	0.302167	N	N	N	N
BRAP	ENSG00000089234.15	protein_coding	chr12	111642146	111685986	-	Nuclear membrane	non-IFN			13.1409	13.8264	12.9249	12.8477	darkorange	turquoise	0.0832663	0.140508	-0.0572415	-0.0770586	553.63	0.0321194	0.748932	0.932443	-0.0537817	0.223139	-0.335376	N	N	N	N
BRAT1	ENSG00000106009.15	protein_coding	chr7	2537877	2555727	-		non-IFN			22.684	22.8389	22.6823	22.5762	pink	turquoise	0.245223	0.288964	-0.0437403	-0.071434	1050.74	0.0112932	0.898027	0.976213	-0.0899132	-0.0177881	-0.26325	N	N	N	N
BRCA1	ENSG00000012048.20	protein_coding	chr17	43044295	43170245	-		non-IFN			0.857384	0.695469	0.998044	0.847565	white	red	0.180262	0.0328299	0.147432	-0.774863	48.5709	0.116793	0.537648	0.856992	-0.0226861	0.106728	-0.136641	N	N	N	N
BRCC3	ENSG00000185515.14	protein_coding	chrX	155071420	155123074	+		non-IFN			16.7327	17.3566	16.0425	16.9013	blue	blue	0.195574	0.0977937	0.0977802	0.688415	455.565	-0.0859759	0.395828	0.773918	-0.145846	-0.111457	-0.155667	N	N	N	N
BRCC3P1	ENSG00000251667.1	processed_pseudogene	chr5	176308063	176309013	+		non-IFN			0.937058	0.88267	0.871128	1.03362	grey	grey	0.0796523	0.0213314	0.0583209	1.29291	12.1115	-0.213316	0.178755	0.568447	-0.104997	0.106278	-0.149786	N	N	N	N
BRD1	ENSG00000100425.18	protein_coding	chr22	49773283	49827512	-		non-IFN			1.11172	1.08022	1.16546	1.08654	darkgrey	grey	0.113941	0.0288036	0.0851369	-0.686151	81.3253	0.046052	0.737431	0.929608	0.000880064	-0.116636	0.0174693	N	N	N	N
BRD2	ENSG00000204256.12	protein_coding	chr6	32968660	32981505	+		non-IFN			32.9619	32.8646	33.4324	32.6153	brown	turquoise	0.252684	0.101676	0.151008	-0.546671	1744.67	-0.00377661	0.941351	0.987415	0.0928223	0.208954	-0.0368412	N	N	N	N
BRD3	ENSG00000169925.16	protein_coding	chr9	134030305	134068535	-	Nuclear bodies	non-IFN			9.59677	9.36598	9.72498	9.64655	turquoise	turquoise	0.248144	0.436911	-0.188767	-0.151075	634.676	0.00421131	0.954319	0.990165	-0.283454	-0.107629	-0.47513	N	N	N	N
BRD4	ENSG00000141867.17	protein_coding	chr19	15235519	15332545	-		non-IFN			4.74648	4.24139	5.14811	4.74863	grey	grey	0.075425	0.0256272	0.0497978	-1.0558	358.734	0.0616362	0.469509	0.81774	0.137828	0.105377	0.0394356	N	N	N	N
BRD7	ENSG00000166164.15	protein_coding	chr16	50313487	50368934	-		non-IFN			13.6114	13.4027	14.2486	13.1965	salmon	turquoise	0.29995	0.173724	0.126226	-1.48381	298.202	0.183637	0.214274	0.615522	-0.326186	-0.211205	-0.582713	N	N	N	N
BRD7P2	ENSG00000184100.6	processed_pseudogene	chr3	160100850	160102793	+		non-IFN			1.3402	1.33624	1.44311	1.25219	salmon	red	0.330153	0.121131	0.209022	-1.07159	39.1841	0.158283	0.31556	0.713852	-0.0990806	-0.0830861	-0.256504	N	N	N	N
BRD8	ENSG00000112983.17	protein_coding	chr5	138139766	138178986	-	Mitochondria;Nucleoplasm	non-IFN			7.68501	8.25963	6.51116	8.31515	grey	yellow	0.147828	0.0955357	0.0522923	1.98504	356.278	-0.284036	0.0549926	0.321803	-0.27678	-0.310278	-0.116923	N	N	N	N
BRD9	ENSG00000028310.17	protein_coding	chr5	850291	892824	-	Nucleoplasm	non-IFN			9.5033	10.1178	8.98679	9.52532	darkturquoise	blue	0.123194	0.0776224	0.045572	0.804902	301.726	-0.081215	0.394838	0.773541	0.020926	0.0135099	0.0432408	N	N	N	N
BRD9P2	ENSG00000249908.2	unprocessed_pseudogene	chr5	767382	768930	-		non-IFN			7.39895	7.72555	7.18013	7.36149	turquoise	grey	0.188715	0.027797	0.160918	0.198493	6.44668	-0.0346008	0.827777	0.955621	0.087053	0.161444	0.0266363	N	N	N	N
BRE	ENSG00000158019.20	protein_coding	chr2	27889941	28338901	+		non-IFN			35.164	35.1827	34.419	35.8081	red	blue	0.203755	0.299689	-0.095934	0.802805	844.687	-0.0630945	0.324598	0.721312	-0.207475	-0.132397	-0.162412	N	N	N	N
BRF1	ENSG00000185024.16	protein_coding	chr14	105209286	105315589	-	Nuclear bodies;Nucleoplasm	non-IFN			3.52659	3.71018	3.25647	3.63534	black	red	0.140235	0.0275533	0.112682	1.00494	134.673	-0.115347	0.449181	0.806458	0.0207793	0.125642	0.070742	N	N	N	N
BRF2	ENSG00000104221.12	protein_coding	chr8	37843268	37849904	-	Nucleoli	non-IFN			2.674	2.41484	2.84655	2.70469	turquoise	red	0.372209	0.0881031	0.284106	-0.332938	33.6296	-0.0308671	0.869893	0.967502	-0.196377	-0.283258	-0.164142	N	Y	N	N
BRI3	ENSG00000164713.9	protein_coding	chr7	98252379	98310441	+		non-IFN	Sex Hormone-Binding Globulin	Chemicals and Drugs Category	354.866	320.081	367.011	368.704	black	red	0.362962	0.117494	0.245469	0.0324164	3603.78	-0.0264647	0.886885	0.973036	-0.100792	-0.0583179	-0.115021	N	N	N	N
BRI3BP	ENSG00000184992.10	protein_coding	chr12	124993700	125031231	+	Mitochondria;Nucleoplasm	non-IFN			1.96581	1.9055	1.69962	2.24325	salmon	red	0.180828	0.0837788	0.0970493	2.58342	203.974	-0.371292	0.00703213	0.084919	-0.215371	-0.113709	-0.0767957	N	N	N	N
BRI3P1	ENSG00000225169.1	processed_pseudogene	chr1	100213293	100213670	+		non-IFN			2.27479	1.91136	2.69974	2.15636	black	black	0.300023	0.0825934	0.21743	-1.06353	7.23969	0.14369	0.481702	0.826192	-0.0796815	-0.0798865	-0.174466	N	N	N	N
BRICD5	ENSG00000182685.7	protein_coding	chr16	2209253	2211950	-	Actin filaments;Nucleoplasm	non-IFN			1.84468	1.75973	1.84009	1.90869	cyan	turquoise	0.161637	0.0504392	0.111197	0.359392	22.227	-0.125385	0.45493	0.809312	-0.0892532	-0.0725033	-0.0665908	N	N	N	N
BRIX1	ENSG00000113460.12	protein_coding	chr5	34915376	34925996	+		non-IFN			10.7354	11.3063	10.4749	10.5622	turquoise	grey	0.171712	0.0284155	0.143296	0.107368	283.845	-0.0307251	0.769383	0.939447	-0.151689	-0.19004	-0.136987	N	N	N	N
BRK1	ENSG00000254999.3	protein_coding	chr3	10115592	10127190	+	Cell Junctions;Nuclear speckles	non-IFN			150.842	148.579	145.01	157.586	black	grey	0.103555	0.0293346	0.0742204	2.99107	2638.91	-0.144978	0.00265607	0.0410838	-0.240013	0.0556159	-0.300264	Y	N	N	N
BRMS1	ENSG00000174744.13	protein_coding	chr11	66337333	66345125	-	Centrosome	non-IFN			32.3681	30.9305	32.9193	32.8965	darkturquoise	turquoise	0.182802	0.101555	0.0812474	-0.0135799	690.247	-0.0120384	0.852642	0.963453	-0.211509	-0.309377	-0.0183341	N	N	N	N
BRMS1L	ENSG00000100916.13	protein_coding	chr14	35826318	35932325	+		non-IFN			0.933447	0.916716	0.706571	1.14544	purple	red	0.14014	0.0194644	0.120676	2.2929	36.882	-0.398071	0.0514083	0.31031	0.0603283	0.056767	0.290059	N	N	N	N
BROX	ENSG00000162819.11	protein_coding	chr1	222712553	222735196	+	Cytosol;Golgi apparatus;Nucleoplasm	non-IFN			33.443	32.6375	33.9725	33.5444	lightgreen	brown	0.467752	0.202272	0.265479	-0.141887	1976.1	-0.00175433	0.987485	0.997237	0.0906955	0.433444	-0.189395	N	Y	N	N
BRPF1	ENSG00000156983.15	protein_coding	chr3	9731729	9748018	+	Cytosol;Plasma membrane	non-IFN			5.70882	5.1956	5.65826	6.1157	grey	black	0.108377	0.0880187	0.0203584	1.0696	422.244	-0.0931881	0.357141	0.745547	-0.0632913	0.0738543	-0.139408	N	N	N	N
BRWD1	ENSG00000185658.13	protein_coding	chr21	39184176	39321559	-		non-IFN			12.6288	12.6695	12.8706	12.3867	lightgreen	brown	0.184736	0.0973259	0.0874101	-0.492437	934.044	-0.0590201	0.464854	0.814872	0.0410697	0.267722	-0.177806	N	N	N	N
BRWD1-IT1	ENSG00000237373.1	sense_overlapping	chr21	39217093	39219805	-		non-IFN			0.627676	0.423404	0.933135	0.502344	greenyellow	green	0.198879	0.0543603	0.144519	-1.55963	3.4869	0.281441	0.14255	0.515409	0.0762326	0.09489	0.0256159	N	N	N	N
BRWD3	ENSG00000165288.10	protein_coding	chrX	80670854	80809688	-	Cytosol;Nucleoplasm	non-IFN			0.918189	0.904718	0.865122	0.974522	purple	red	0.131662	0.0329167	0.0987456	1.06325	177.829	-0.187294	0.199266	0.594662	0.129712	0.160768	0.333646	N	N	N	N
BSCL2	ENSG00000168000.14	protein_coding	chr11	62690275	62709845	-		non-IFN			18.9688	17.4629	18.4418	20.4969	red	grey	0.15854	0.0284942	0.130046	1.06809	21.7467	-0.0201357	0.897291	0.97611	0.118222	0.241377	0.119518	N	N	N	N
BSDC1	ENSG00000160058.18	protein_coding	chr1	32365103	32394731	-		non-IFN			11.5646	10.6713	12.353	11.4995	blue	turquoise	0.129617	0.148325	-0.0187087	-0.865534	512.98	0.0624877	0.521863	0.849703	-0.0608711	-0.0538146	-0.0404734	N	N	N	N
BSG	ENSG00000172270.18	protein_coding	chr19	571277	583493	+	Vesicles	non-IFN			195.74	185.766	200.01	199.012	grey	turquoise	0.168673	0.129469	0.039204	-0.105133	4667.33	-0.00563968	0.934515	0.985873	-0.14812	0.061245	-0.360282	N	N	N	N
BSN-AS1	ENSG00000235120.1	antisense	chr3	49640483	49641769	-		non-IFN			0.955555	0.963905	0.907756	0.991836	grey	blue	0.0805347	0.0377064	0.0428283	0.714638	4.16678	-0.128625	0.43915	0.799537	0.0597106	0.028374	0.309604	N	N	N	N
BST1	ENSG00000109743.10	protein_coding	chr4	15702950	15738313	+		non-IFN			141.376	145.214	148.112	132.724	green	turquoise	0.326391	0.281353	0.0450376	-2.13433	3285.8	0.136396	0.0424992	0.277583	-0.0316334	0.0878145	-0.292481	N	N	N	N
BST2	ENSG00000130303.12	protein_coding	chr19	17402939	17405648	-		IFN			157.713	119.427	227.972	122.744	green	salmon	0.480183	0.0838327	0.39635	-8.18766	2358.83	0.839477	1.23626e-25	3.68318e-23	0.455287	0.256689	0.317215	Y	Y	Y	N
BTAF1	ENSG00000095564.13	protein_coding	chr10	91923769	92030325	+	Vesicles	non-IFN			9.73812	10.3224	9.6913	9.36697	salmon	blue	0.198095	0.0904313	0.107664	-0.514978	1152.1	0.040389	0.662034	0.90511	0.169535	0.0337748	0.296805	N	N	N	N
BTBD1	ENSG00000064726.9	protein_coding	chr15	83016422	83067354	-		non-IFN			17.1532	16.7785	16.3299	18.1441	lightgreen	blue	0.126006	0.328019	-0.202012	1.66561	689.392	-0.0887831	0.268722	0.673106	-0.222852	0.00360265	-0.335203	N	N	N	N
BTBD10	ENSG00000148925.10	protein_coding	chr11	13388001	13463297	-		non-IFN			13.7892	13.973	13.6415	13.7897	blue	blue	0.259656	0.0855243	0.174131	0.101282	461.687	0.00641354	0.964968	0.993093	-0.190534	-0.204225	-0.249759	N	N	N	N
BTBD10P1	ENSG00000257675.1	processed_pseudogene	chr12	52748776	52750127	+		non-IFN			0.798026	0.828586	0.753261	0.815953	blue	grey	0.156768	0.0344824	0.122285	0.619099	15.1919	-0.0953036	0.558459	0.867664	-0.0153522	-0.061245	0.0491216	N	N	N	N
BTBD11	ENSG00000151136.14	protein_coding	chr12	107318413	107659642	+	Nucleoplasm	non-IFN			0.955126	1.00514	0.743355	1.10668	turquoise	pink	0.48958	0.0646142	0.424966	1.42315	65.9609	-0.363958	0.0761181	0.385864	-0.303744	-0.382556	-0.185244	N	Y	N	N
BTBD2	ENSG00000133243.8	protein_coding	chr19	1985438	2034881	-		non-IFN			2.38981	1.98471	3.00206	2.13555	grey	grey	0.0917011	0.0222559	0.0694452	-2.91326	102.529	0.381835	0.0124905	0.127936	0.113259	-0.0882649	0.132317	N	N	N	N
BTBD3	ENSG00000132640.14	protein_coding	chr20	11890723	11926609	+		non-IFN			2.29123	1.94105	2.11608	2.69296	royalblue	grey	0.0773616	0.0376709	0.0396907	1.84302	176.632	-0.264157	0.117142	0.472807	-0.113308	-0.114159	-0.00622668	N	N	N	N
BTBD7	ENSG00000011114.14	protein_coding	chr14	93237550	93333092	-	Focal adhesion sites	non-IFN			4.04389	4.04359	3.71238	4.33662	cyan	midnightblue	0.0902635	0.0443272	0.0459363	1.5415	279.604	-0.237887	0.0349362	0.249177	0.0348603	-0.0815099	0.193546	N	N	N	N
BTBD7P1	ENSG00000203414.2	processed_pseudogene	chr10	13156684	13158136	-		non-IFN			2.27877	2.12406	2.34463	2.32987	yellowgreen	grey	0.158927	0.0255287	0.133398	-0.0582519	49.3538	-0.0255875	0.856116	0.964399	0.0908422	0.16392	-0.042376	N	N	N	N
BTBD9	ENSG00000183826.16	protein_coding	chr6	38168451	38640148	-	Nucleoplasm	non-IFN			2.61205	2.0731	2.62021	2.98529	grey	greenyellow	0.112034	0.02065	0.0913837	0.77962	114.965	0.0245359	0.864549	0.965835	-0.322519	-0.325139	-0.248375	N	N	N	N
BTD	ENSG00000169814.12	protein_coding	chr3	15601341	15645822	+		non-IFN			7.44505	7.3356	6.884	8.01734	turquoise	grey	0.158886	0.036818	0.122068	1.82141	231.252	-0.231603	0.0465425	0.293121	-0.0726053	0.0808344	-0.0882112	N	N	N	N
BTF3	ENSG00000145741.15	protein_coding	chr5	73498408	73505635	+		non-IFN			243.454	244.207	229.457	255.274	magenta	brown	0.163582	0.100992	0.0625903	4.02128	2893.47	-0.174944	0.000861115	0.0174694	-0.145308	-0.162119	0.141138	Y	N	N	N
BTF3L4	ENSG00000134717.17	protein_coding	chr1	52056125	52090716	+	Cytosol;Nucleus	non-IFN			57.8177	60.3761	57.9195	55.922	grey	blue	0.114373	0.0889794	0.0253936	-0.76266	1422.49	-0.00602317	0.927679	0.98403	-0.168117	-0.0475099	-0.377233	N	N	N	N
BTF3L4P1	ENSG00000232260.2	processed_pseudogene	chr21	17518526	17518993	-		non-IFN			3.00206	3.04409	2.98191	2.99017	grey	grey	0.0912036	0.0229081	0.0682955	0.0284161	13.3506	-0.00540559	0.966937	0.993324	-0.153645	-0.0349007	-0.282449	N	N	N	N
BTF3L4P2	ENSG00000213189.5	processed_pseudogene	chr2	159003975	159004320	+		non-IFN			22.1367	22.3912	23.5911	20.6738	grey	yellow	0.0978171	0.0471166	0.0507005	-2.22042	57.1452	0.15247	0.0575723	0.329915	0.0802814	0.120238	-0.134219	N	N	N	N
BTF3L4P3	ENSG00000213108.3	processed_pseudogene	chr6	137543897	137544372	-		non-IFN			5.14567	5.03115	5.45019	4.95782	grey	turquoise	0.140714	0.0568859	0.0838277	-1.06773	23.6797	0.111286	0.329978	0.724976	0.028431	0.119338	-0.0856168	N	N	N	N
BTF3P10	ENSG00000231120.3	processed_pseudogene	chr6	149977922	149978416	+		non-IFN			2.64439	2.7913	2.60692	2.57375	grey	grey	0.101376	0.0160205	0.0853552	-0.193921	12.7859	-0.00401392	0.970754	0.99396	0.0863441	0.14298	-0.00570779	N	N	N	N
BTF3P12	ENSG00000213003.3	processed_pseudogene	chr8	70273369	70273837	+		non-IFN			1.22312	1.14134	1.09223	1.39635	purple	pink	0.0956193	0.0321163	0.0635029	0.886514	6.10626	-0.155384	0.445877	0.804044	-0.0777222	0.0815819	-0.128109	N	N	N	N
BTF3P5	ENSG00000233594.2	processed_pseudogene	chr2	55435156	55435622	-		non-IFN			2.1018	2.14049	2.06625	2.10584	grey	grey	0.0604746	0.0161556	0.044319	0.221064	9.34742	-0.0301091	0.816133	0.95337	-0.0384784	-0.243404	0.101356	N	N	N	N
BTF3P7	ENSG00000219986.2	processed_pseudogene	chr6	6794915	6795402	-		non-IFN			0.919579	0.822968	1.26159	0.686003	grey	pink	0.121616	0.046059	0.0755568	-1.85973	4.91141	0.334016	0.0912179	0.420781	-0.00630014	0.097497	-0.294945	N	N	N	N
BTF3P8	ENSG00000236813.1	processed_pseudogene	chrX	63766875	63767400	+		non-IFN			4.16494	4.43584	3.96358	4.15138	grey	grey	0.0638975	0.0200515	0.043846	0.760753	22.1843	-0.0689406	0.459844	0.812096	0.00743165	0.0970463	0.00795631	N	N	N	N
BTG1	ENSG00000133639.4	protein_coding	chr12	92140278	92145897	-	Cytosol;Nucleoplasm	non-IFN			76.2071	81.7039	71.5663	76.4219	grey	blue	0.10455	0.12645	-0.0218994	1.02598	5541.69	-0.0965082	0.261321	0.666567	-0.271255	-0.18306	-0.160164	N	N	N	N
BTG2	ENSG00000159388.5	protein_coding	chr1	203305491	203309602	+	Nucleoplasm;Vesicles	non-IFN			75.0436	91.876	66.2006	70.9646	skyblue	darkgrey	0.106496	0.0488306	0.0576656	0.536695	2909.02	-0.0823433	0.583988	0.875214	-0.0659804	-0.00292715	0.00259445	N	N	N	N
BTG3	ENSG00000154640.14	protein_coding	chr21	17593653	17612947	-		non-IFN			2.23704	1.64928	3.02828	1.95379	magenta	magenta	0.145429	0.0275764	0.117852	-2.4908	53.0633	0.412568	0.0301756	0.228591	0.275387	0.066649	0.335895	N	N	N	N
BTK	ENSG00000010671.15	protein_coding	chrX	101349447	101390796	-		non-IFN			41.3721	39.7229	44.2693	39.98	blue	turquoise	0.187812	0.345154	-0.157342	-1.9284	1656.42	0.141158	0.0473407	0.296395	-0.00752944	0.087139	-0.309777	N	N	N	N
BTN2A1	ENSG00000112763.15	protein_coding	chr6	26457904	26476621	+	Plasma membrane	non-IFN	Education	Other	10.1868	10.0847	10.6314	9.86656	grey60	turquoise	0.0810059	0.110103	-0.0290975	-0.966299	465.094	0.0942879	0.368804	0.754947	-0.147191	-0.0144106	-0.333127	N	N	N	N
BTN2A2	ENSG00000124508.16	protein_coding	chr6	26383096	26394874	+		non-IFN			6.7606	7.40058	6.35513	6.66662	grey	turquoise	0.0787819	0.1278	-0.0490176	0.477038	250.357	-0.0728584	0.594752	0.879962	-0.115655	-0.116636	-0.140965	N	N	N	N
BTN2A3P	ENSG00000124549.14	transcribed_unprocessed_pseudogene	chr6	26421391	26432383	+		non-IFN	Platelet Function Tests	Diagnostic Techniques and Procedures	0.989234	0.96718	1.17289	0.842749	turquoise	grey	0.728108	0.0190628	0.709045	-1.24421	39.7983	0.319712	0.088141	0.413539	0.0146188	-0.335722	0.284352	N	Y	N	N
BTN3A1	ENSG00000026950.16	protein_coding	chr6	26402237	26415216	+		IFN	Body Mass Index	Body Weights and Measures;Diagnostic Techniques and Procedures;Physical Examination	11.6253	9.7266	14.1819	10.7096	blue	yellow	0.250702	0.0938474	0.156854	-2.91309	621.99	0.358366	0.00158791	0.0273234	0.0210482	-0.0569669	-0.11675	Y	N	N	N
BTN3A2	ENSG00000186470.13	protein_coding	chr6	26365159	26378320	+		non-IFN	Platelet Function Tests	Diagnostic Techniques and Procedures	16.2298	14.6635	19.3769	14.5587	salmon	yellow	0.294071	0.0719195	0.222152	-2.66508	612.302	0.323863	0.0114501	0.120568	0.0733631	-0.0623708	-0.0212745	N	N	N	N
BTN3A3	ENSG00000111801.15	protein_coding	chr6	26440472	26453415	+		non-IFN			8.59908	7.31975	11.2207	7.18895	midnightblue	salmon	0.167358	0.163109	0.00424847	-5.22402	424.895	0.593069	1.1266e-08	8.83283e-07	0.0796947	-0.297444	0.046873	Y	N	N	N
BTRC	ENSG00000166167.17	protein_coding	chr10	101354033	101557321	+	Cytosol;Nucleoplasm;Plasma membrane	non-IFN			1.26827	1.19523	1.34886	1.24872	grey	yellow	0.13789	0.0668146	0.071075	-0.45784	128.367	0.066736	0.719747	0.923649	-0.129956	-0.095245	-0.191816	N	N	N	N
BUB3	ENSG00000154473.17	protein_coding	chr10	123154277	123170467	+		non-IFN			78.5529	80.4067	76.646	78.9269	turquoise	turquoise	0.514296	0.439786	0.0745096	0.433608	1754.11	-0.0402556	0.619362	0.889586	-0.259154	-0.231695	-0.249932	N	N	N	N
BUD13	ENSG00000137656.11	protein_coding	chr11	116748170	116772988	-		non-IFN			5.28798	5.08912	5.80573	4.97152	white	yellow	0.142797	0.0880187	0.0547784	-1.1619	180.859	0.170788	0.279384	0.684251	-0.0681561	-0.164821	-0.0695312	N	N	N	N
BUD31	ENSG00000106245.9	protein_coding	chr7	99408641	99419616	+	Centrosome;Microtubules;Nucleus	non-IFN			68.0483	61.2129	73.0012	68.503	turquoise	turquoise	0.102687	0.0960603	0.00662693	-1.64402	754.09	0.0654538	0.271082	0.675348	0.182442	0.302848	-0.0835412	N	N	N	N
BX255923.2	ENSG00000204790.9	unprocessed_pseudogene	chr9	63974762	64004155	-		non-IFN			21.0504	20.8802	24.7517	17.9048	blue	blue	0.130937	0.202311	-0.0713738	-4.38987	66.2296	0.434238	3.85581e-07	2.25247e-05	0.142522	0.0963708	-0.252007	Y	N	N	N
BX470102.3	ENSG00000238279.1	antisense	chr1	153533603	153535115	+		non-IFN			2.0576	1.65609	2.67769	1.7939	purple	purple	0.154411	0.0243801	0.130031	-2.28314	17.5283	0.437716	0.0176556	0.160649	0.242054	0.201298	0.131982	N	N	N	N
BYSL	ENSG00000112578.9	protein_coding	chr6	41921188	41933046	+		non-IFN	Menarche	Other	1.88156	1.85539	2.06102	1.74167	grey	grey	0.124318	0.0217411	0.102577	-0.874734	58.9093	0.136047	0.506241	0.842322	0.0381366	-0.114159	0.131625	N	N	N	N
BZW1	ENSG00000082153.17	protein_coding	chr2	200810594	200827338	+	Vesicles	non-IFN			66.4628	62.9604	68.4109	67.2161	lightgreen	lightyellow	0.294873	0.390341	-0.0954673	-0.322081	3288.34	0.0139268	0.850821	0.962829	0.0453722	0.280781	-0.181438	N	N	N	N
BZW1P2	ENSG00000198406.7	processed_pseudogene	chr3	116645902	116646727	-		non-IFN			36.0538	34.0102	37.1197	36.556	lightgreen	lightyellow	0.359724	0.291787	0.0679371	-0.246659	383.372	0.0175092	0.846293	0.961367	0.0469368	0.344278	-0.205134	N	N	N	N
BZW2	ENSG00000136261.14	protein_coding	chr7	16646131	16706523	+	Actin filaments;Cytosol;Plasma membrane	non-IFN			19.2447	19.9776	17.678	20.1097	grey60	blue	0.169047	0.0446897	0.124357	1.57186	434.311	-0.186314	0.0997061	0.439706	-0.276658	-0.154238	-0.249932	N	N	N	N
C10orf105	ENSG00000214688.4	protein_coding	chr10	71711701	71737824	-		non-IFN			1.33214	1.23001	1.64515	1.12805	turquoise	yellow	0.478744	0.0918955	0.386849	-2.2918	102.817	0.461728	0.00380465	0.0540873	-0.0378428	-0.196569	-0.105853	N	Y	N	N
C10orf11	ENSG00000148655.14	protein_coding	chr10	75431453	76560167	+	Cytosol	non-IFN			72.6466	74.2408	69.7322	74.0928	grey	blue	0.0782084	0.0402435	0.0379649	0.811974	516.291	-0.142243	0.108902	0.458724	-0.0568864	-0.126093	0.0492945	N	N	N	N
C10orf128	ENSG00000204161.13	protein_coding	chr10	49154725	49188585	-		non-IFN	Survival	Other	3.89004	3.76654	3.29855	4.49913	grey	grey	0.111976	0.0379603	0.0740156	1.33321	76.0659	-0.242873	0.232253	0.6374	-0.317327	-0.467877	-0.104643	N	N	N	N
C10orf54	ENSG00000107738.19	protein_coding	chr10	71747559	71773498	-	Nucleoplasm	non-IFN			286.025	286.042	297.463	275.921	grey60	turquoise	0.177784	0.676863	-0.499079	-1.97386	21559.4	0.100785	0.0593244	0.334562	-0.125116	0.0560662	-0.465271	N	Y	N	N
C10orf76	ENSG00000120029.12	protein_coding	chr10	101845599	102056193	-	Vesicles	non-IFN			17.2316	17.4963	17.2794	17.0025	sienna3	blue	0.20921	0.0859882	0.123222	-0.22062	708.045	-0.00785337	0.928752	0.984343	0.0814304	-0.0412053	0.177979	N	N	N	N
C10orf88	ENSG00000119965.12	protein_coding	chr10	122930903	122954403	-		non-IFN			1.93996	1.86083	1.85611	2.06979	skyblue	blue	0.0898743	0.0395584	0.0503159	0.643681	76.951	-0.0935599	0.624535	0.891491	-0.328011	-0.194179	-0.452126	N	N	N	N
C11orf1	ENSG00000137720.7	protein_coding	chr11	111878935	111885975	+		non-IFN			6.37496	6.13752	5.57388	7.2494	greenyellow	turquoise	0.11158	0.0519389	0.0596413	1.68693	61.7956	-0.197061	0.160572	0.54077	-0.0201437	0.029947	0.217069	N	N	N	N
C11orf21	ENSG00000110665.11	protein_coding	chr11	2295645	2303049	-		non-IFN			18.6693	18.8262	18.2962	18.8877	lightyellow	turquoise	0.129846	0.179696	-0.0498504	0.475061	877.299	-0.0537359	0.535814	0.856539	-0.207646	-0.133523	-0.31462	N	N	N	N
C11orf24	ENSG00000171067.10	protein_coding	chr11	68261335	68272001	-		non-IFN			11.5207	10.4092	13.2397	10.7886	turquoise	grey60	0.186683	0.213201	-0.026518	-2.10236	325.678	0.253096	0.0410325	0.27218	0.0807459	0.208278	-0.251489	N	N	N	N
C11orf31	ENSG00000211450.9	protein_coding	chr11	57741250	57743554	+	Nucleoli;Nucleus	non-IFN			139.551	129.166	147.731	139.666	blue	black	0.297767	0.0903734	0.207393	-1.5043	693.177	0.0386422	0.574459	0.872884	-0.017039	-0.0950198	-0.131798	N	N	N	N
C11orf49	ENSG00000149179.13	protein_coding	chr11	46936689	47164385	+	Nuclear speckles	non-IFN			4.98872	5.62443	4.14574	5.28378	grey	turquoise	0.115736	0.0316154	0.084121	2.23924	116.119	-0.31523	0.0418215	0.275138	-0.0971004	-0.120689	0.0786983	N	N	N	N
C11orf54	ENSG00000182919.14	protein_coding	chr11	93741591	93764749	+	Nuclear bodies;Nucleoplasm	non-IFN			9.24396	8.89141	9.54858	9.22404	grey	pink	0.110551	0.126676	-0.0161257	-0.381723	297.152	0.00697867	0.950654	0.989316	-0.0409474	0.0607947	-0.161894	N	N	N	N
C11orf57	ENSG00000150776.17	protein_coding	chr11	112074086	112085150	+		non-IFN			3.21369	3.38172	3.0188	3.26704	turquoise	grey	0.107753	0.0141247	0.0936283	0.797111	160.904	-0.131318	0.333012	0.727157	0.109275	0.232146	0.0373601	N	N	N	N
C11orf58	ENSG00000110696.9	protein_coding	chr11	16613132	16756881	+	Endoplasmic reticulum;Nucleoplasm	non-IFN			141.243	133.656	154.817	134.621	blue	yellow	0.338019	0.422085	-0.0840666	-3.29766	2790.13	0.179158	4.57907e-05	0.00159161	0.029531	0.0812847	-0.350251	Y	N	N	N
C11orf63	ENSG00000109944.10	protein_coding	chr11	122882528	122959798	+	Golgi apparatus	non-IFN			0.702873	0.82832	0.66368	0.648904	darkred	pink	0.0612104	0.0972391	-0.0360287	-0.0957999	22.6433	0.0299965	0.881869	0.971909	0.071163	0.126768	-0.0159126	N	N	N	N
C11orf68	ENSG00000175573.6	protein_coding	chr11	65916808	65919117	-	Nucleoli;Nucleus	non-IFN			10.906	11.0872	11.7613	10.0236	blue	turquoise	0.264488	0.0710343	0.193453	-1.58635	245.236	0.200235	0.104606	0.449527	0.0271842	-0.0842119	0.0447975	N	N	N	N
C11orf71	ENSG00000180425.10	protein_coding	chr11	114391443	114400550	-		non-IFN			5.42027	5.1634	5.52627	5.50807	orange	grey	0.120863	0.0777983	0.0430651	-0.0323857	14.2233	-0.0447167	0.717924	0.92322	-0.126045	-0.059894	-0.0980701	N	N	N	N
C11orf72	ENSG00000184224.3	lincRNA	chr11	67602880	67606706	-		non-IFN			5.44811	5.02986	6.10392	5.16468	grey	tan	0.129884	0.0516757	0.0782086	-3.04749	210.458	0.223903	0.00590009	0.0743034	-0.00858063	-0.281682	0.0871735	N	N	N	N
C11orf74	ENSG00000166352.15	protein_coding	chr11	36594493	36659290	+	Aggresome;Cytosol	non-IFN			7.82078	7.51579	7.2777	8.51525	darkgreen	turquoise	0.276838	0.0456678	0.23117	1.19888	85.0016	-0.145638	0.364036	0.751782	0.179998	0.237099	0.303896	N	N	N	N
C12orf10	ENSG00000139637.13	protein_coding	chr12	53299686	53307177	+		non-IFN			30.4011	29.6069	31.0302	30.4065	grey	turquoise	0.133638	0.0327493	0.100888	-0.34057	406.931	0.00523375	0.946447	0.988066	0.0534395	0.191166	-0.117788	N	N	N	N
C12orf29	ENSG00000133641.17	protein_coding	chr12	88033846	88050160	+	Vesicles	non-IFN			1.44698	1.72114	1.19617	1.47475	grey	grey	0.0804658	0.0386957	0.0417701	1.22944	60.5716	-0.205709	0.298424	0.701016	-0.27342	-0.217832	-0.271033	N	N	N	N
C12orf4	ENSG00000047621.11	protein_coding	chr12	4487728	4538508	-	Nuclear bodies	non-IFN			5.74718	6.41665	5.81505	5.21473	turquoise	blue	0.11565	0.0493417	0.0663085	-0.978393	243.308	0.141271	0.345031	0.735447	-0.0390406	-0.0378278	-0.138544	N	N	N	N
C12orf43	ENSG00000157895.11	protein_coding	chr12	121000486	121016502	-	Golgi apparatus	non-IFN			5.31798	4.78911	5.49887	5.5317	turquoise	turquoise	0.236206	0.0532734	0.182932	0.0535887	156.074	0.0353037	0.797051	0.94792	-0.049308	0.106053	-0.191989	N	N	N	N
C12orf45	ENSG00000151131.10	protein_coding	chr12	104986310	105074197	+	Nuclear membrane;Nucleoplasm	non-IFN			18.1241	20.7134	17.9604	16.4408	yellow	pink	0.188095	0.0792198	0.108875	-0.807147	583.201	0.107599	0.0773012	0.388894	-0.229721	-0.442901	-0.142176	N	N	N	N
C12orf49	ENSG00000111412.5	protein_coding	chr12	116710185	116738070	-		non-IFN			7.03395	7.39498	6.80257	6.98325	darkorange	turquoise	0.0884373	0.170223	-0.0817858	0.289738	400.442	-0.22125	0.00988599	0.108057	-0.125776	-0.103126	-0.147365	N	N	N	N
C12orf57	ENSG00000111678.10	protein_coding	chr12	6942978	6946003	+		non-IFN			4.24814	3.92677	3.93031	4.75544	grey	black	0.0698838	0.0367463	0.0331374	1.18255	20.4625	-0.186461	0.323901	0.721181	0.13949	0.0310728	0.382422	N	N	N	N
C12orf65	ENSG00000130921.7	protein_coding	chr12	123232916	123257959	+	Cytosol;Mitochondria;Nucleus	non-IFN			3.85608	4.02634	4.01289	3.59753	blue	lightyellow	0.151755	0.0865094	0.0652452	-0.944537	94.1437	0.0686285	0.657311	0.902489	-0.0714808	-0.284834	-0.109659	N	N	N	N
C12orf66	ENSG00000174206.12	protein_coding	chr12	64186316	64222296	-		non-IFN			1.45904	1.90523	1.54788	1.06568	white	grey	0.117557	0.0226745	0.0948829	-2.28115	63.232	0.366564	0.0221532	0.186518	0.0362293	-0.0988477	0.0596723	N	N	N	N
C12orf73	ENSG00000204954.9	protein_coding	chr12	103950202	103965708	-	Centrosome;Mitochondria;Plasma membrane	non-IFN			2.98261	2.90914	3.4152	2.65278	grey	purple	0.0874178	0.0206362	0.0667816	-1.48755	34.1834	0.229519	0.208647	0.607326	0.0580598	-0.000675496	-0.0816386	N	N	N	N
C12orf75	ENSG00000235162.8	protein_coding	chr12	105235290	105396097	+	Vesicles	non-IFN			1.01723	0.666639	0.536703	1.68869	salmon	purple	0.0952043	0.146848	-0.0516438	1.43652	11.1529	-0.15483	0.393164	0.772189	-0.148032	-0.295043	0.0405336	N	N	N	N
C12orf76	ENSG00000174456.13	protein_coding	chr12	110027028	110073686	-	Actin filaments;Plasma membrane	non-IFN			11.1249	11.2295	10.2664	11.8086	greenyellow	cyan	0.085965	0.0405162	0.0454488	1.8627	201.127	-0.274278	0.0154206	0.14628	-0.111646	-0.0815099	0.0204097	N	N	N	N
C12orf77	ENSG00000226397.8	lincRNA	chr12	24993424	25006403	-		non-IFN			1.76272	1.5463	1.82561	1.85999	lightcyan	green	0.17549	0.141971	0.0335187	0.2267	39.7	-0.0485265	0.674931	0.908206	0.255488	0.0801589	0.426354	N	N	N	N
C14orf1	ENSG00000133935.6	protein_coding	chr14	75649791	75661189	-	Cytosol;Nucleoplasm	non-IFN			4.09067	4.10847	4.39248	3.8118	darkolivegreen	grey	0.302658	0.0247069	0.277951	-1.48579	167.87	0.16615	0.149159	0.523689	0.047279	-0.0416556	0.0505053	N	Y	N	N
C14orf119	ENSG00000179933.5	protein_coding	chr14	23094765	23100462	+		non-IFN			81.3299	84.6715	81.8663	78.4979	blue	yellow	0.351801	0.110721	0.24108	-0.570376	994.109	0.0614169	0.545103	0.861479	-0.0915022	-0.066649	-0.176422	N	N	N	N
C14orf142	ENSG00000170270.4	protein_coding	chr14	93202894	93207094	-	Nucleoli;Nucleus	non-IFN			14.0761	14.2501	14.375	13.6895	blue	yellow	0.126469	0.0633134	0.0631556	-0.54573	222.127	0.0508027	0.651909	0.900353	0.0149122	0.143881	-0.159645	N	N	N	N
C14orf159	ENSG00000133943.20	protein_coding	chr14	91060333	91225632	+		non-IFN			25.4387	26.8181	25.406	24.4938	blue	blue	0.121221	0.0685599	0.0526616	-0.595505	948.11	0.0338553	0.671978	0.9076	-0.0630468	-0.0893907	-0.0432408	N	N	N	N
C14orf166	ENSG00000087302.8	protein_coding	chr14	51989475	52010691	+		non-IFN			83.6597	80.5711	89.8303	80.3954	grey	grey	0.117488	0.0345957	0.0828922	-2.78468	1148.38	0.13014	0.0191752	0.169305	0.203393	-0.0702516	0.163623	N	N	N	N
C14orf169	ENSG00000170468.7	protein_coding	chr14	73490964	73493392	+		non-IFN			2.96153	2.72609	3.14213	2.96837	turquoise	turquoise	0.212013	0.133965	0.078048	-0.371636	103.393	0.0484201	0.785827	0.942947	-0.148364	-0.214583	-0.133874	N	N	N	N
C14orf178	ENSG00000197734.8	protein_coding	chr14	77760830	77769742	+		non-IFN			3.19092	2.84032	3.25709	3.38001	grey	green	0.0776146	0.0497583	0.0278563	0.438188	14.5984	0.015051	0.89899	0.976633	0.131105	0.282808	0.0297497	N	N	N	N
C14orf2	ENSG00000156411.9	protein_coding	chr14	103912288	103928269	-		non-IFN			476.728	474.446	476.583	478.466	yellow	black	0.214592	0.136097	0.078495	0.114814	3006.41	-0.06004	0.328206	0.723622	0.0414852	0.0835364	-0.0138371	N	N	N	N
C14orf28	ENSG00000179476.7	protein_coding	chr14	44897295	44907257	+	Cytosol	non-IFN			1.62994	1.89906	1.5703	1.49259	pink	grey	0.144099	0.0362698	0.107829	-0.238472	39.0212	0.0681151	0.741516	0.930321	-0.212703	-0.0198922	-0.40335	N	N	N	N
C14orf80	ENSG00000185347.17	protein_coding	chr14	105489855	105499575	+	Cytosol;Golgi apparatus;Nucleoplasm	non-IFN			4.87928	4.61469	4.81615	5.12175	turquoise	grey	0.193726	0.0248573	0.168868	0.511128	113.3	-0.0830395	0.573522	0.872543	0.0172835	-0.0634967	0.114156	N	N	N	N
C14orf93	ENSG00000100802.14	protein_coding	chr14	22985908	23010166	-	Nucleus;Plasma membrane	non-IFN			3.64485	3.5944	3.95094	3.41037	grey	turquoise	0.140027	0.10801	0.0320168	-1.32071	101.699	0.206628	0.145332	0.518785	-0.0875419	-0.199497	-0.146154	N	N	N	N
C15orf39	ENSG00000167173.18	protein_coding	chr15	75195643	75212169	+		non-IFN			16.2587	16.2302	17.1821	15.464	grey60	turquoise	0.191391	0.101799	0.0895922	-1.44674	1064.52	0.130112	0.189783	0.582107	0.200606	0.334821	0.0409923	N	N	N	N
C15orf40	ENSG00000169609.13	protein_coding	chr15	82988441	83011641	-	Cytosol;Nucleus	non-IFN			33.1773	34.1188	32.2309	33.3479	black	grey	0.0891963	0.0222754	0.0669209	0.575946	425.414	-0.0635753	0.269331	0.674054	0.152789	0.146358	0.180574	N	N	N	N
C15orf48	ENSG00000166920.11	protein_coding	chr15	45430529	45448761	+		non-IFN			2.29263	1.85842	2.81675	2.13667	tan	magenta	0.155459	0.0730015	0.0824575	-0.848065	21.0922	0.129279	0.532201	0.854944	0.0716512	0.168123	-0.0951377	N	N	N	N
C15orf57	ENSG00000128891.15	protein_coding	chr15	40528683	40565057	-	Nuclear speckles;Vesicles	non-IFN			17.5366	16.7502	18.4589	17.278	blue	blue	0.141639	0.0672536	0.0743857	-0.931302	152.286	0.0354594	0.677699	0.908785	-0.0415097	0.254662	-0.360801	N	N	N	N
C15orf61	ENSG00000189227.5	protein_coding	chr15	67521068	67530143	+	Cytosol;Nucleoli;Vesicles	non-IFN			11.3611	11.2944	11.5938	11.2029	turquoise	grey	0.140601	0.0216399	0.118961	-0.470878	183.682	-0.0384523	0.700165	0.917705	0.162201	0.070702	0.206691	N	N	N	N
C15orf65	ENSG00000261652.2	protein_coding	chr15	55408548	55418764	+	Cytosol;Nucleus	non-IFN			0.756458	0.700172	0.645545	0.894054	grey	grey	0.0704973	0.0201999	0.0502974	0.908332	7.01445	-0.12774	0.476691	0.822759	-0.0923268	0.153314	-0.272257	N	N	N	N
C16orf13	ENSG00000130731.15	protein_coding	chr16	634427	636366	-		non-IFN			59.9547	62.6923	57.5925	60.1066	yellow	purple	0.241587	0.0233483	0.218239	0.875113	547.657	-0.102543	0.159204	0.538643	-0.0328068	-0.197695	0.203751	N	N	N	N
C16orf52	ENSG00000185716.11	protein_coding	chr16	22007638	22087534	+		non-IFN			0.745568	0.596293	0.806419	0.797247	yellow	grey	0.166248	0.021613	0.144635	-0.0573896	22.7319	-0.0151354	0.940198	0.987043	-0.0545177	-0.221887	0.178498	N	N	N	N
C16orf54	ENSG00000185905.3	protein_coding	chr16	29742463	29746006	-		non-IFN			56.3637	48.8424	52.3228	65.2383	red	blue	0.158056	0.0593203	0.0987359	3.25186	2371.04	-0.321254	0.000280673	0.00724435	-0.178506	0.0878145	-0.214128	Y	N	N	N
C16orf58	ENSG00000140688.16	protein_coding	chr16	31489471	31509309	-	Cytosol;Golgi apparatus;Nucleoli;Nucleoplasm;Vesicles	non-IFN			5.37509	5.68572	5.36986	5.16044	turquoise	turquoise	0.776461	0.167828	0.608633	-0.318178	172.481	0.0617705	0.653066	0.901075	-0.295115	-0.286861	-0.34437	N	Y	N	N
C16orf62	ENSG00000103544.14	protein_coding	chr16	19555240	19706793	+	Mitochondria	non-IFN			16.4967	16.2143	17.3462	15.9465	darkturquoise	blue	0.284245	0.36358	-0.0793349	-1.11653	814.043	0.125769	0.177718	0.56711	-0.0696962	-0.029947	-0.172963	N	N	N	N
C16orf70	ENSG00000125149.11	protein_coding	chr16	67109958	67148539	+	Cytosol;Nuclear speckles	non-IFN			13.6067	13.1646	13.3575	14.1386	white	blue	0.122776	0.0914928	0.0312831	0.605634	503.962	-0.11159	0.316035	0.714252	-0.257468	-0.125417	-0.235749	N	N	N	N
C16orf72	ENSG00000182831.11	protein_coding	chr16	9091648	9121640	+	Nucleoplasm;Vesicles	non-IFN			3.28507	3.14041	3.71224	3.01028	darkgreen	turquoise	0.266347	0.205053	0.0612936	-1.88336	320.301	0.261663	0.0373147	0.257938	0.0575464	0.311854	-0.285043	N	N	N	N
C16orf74	ENSG00000154102.10	protein_coding	chr16	85690084	85751129	-	Centrosome;Plasma membrane	non-IFN			16.1084	20.254	11.1181	17.5853	yellow	turquoise	0.197407	0.0514508	0.145956	4.92035	142.839	-0.603575	1.5161e-06	7.86523e-05	-0.292915	-0.276278	-0.0202367	Y	N	N	N
C16orf86	ENSG00000159761.14	protein_coding	chr16	67666816	67668758	+		non-IFN			3.27376	3.64496	3.2127	3.06561	grey	red	0.072926	0.0239014	0.0490246	-0.456595	63.3748	0.0304746	0.811978	0.952687	-0.0140566	-0.120013	0.12782	N	N	N	N
C16orf87	ENSG00000155330.9	protein_coding	chr16	46796607	46831411	-	Nucleoplasm	non-IFN			11.7815	12.3862	11.509	11.5951	skyblue3	magenta	0.13532	0.0891565	0.0461635	0.0784564	302.024	-0.0399857	0.742733	0.930678	-0.00234684	0.164596	-0.144597	N	N	N	N
C16orf91	ENSG00000174109.4	protein_coding	chr16	1419744	1420800	-		non-IFN			12.7418	11.9356	13.3947	12.7347	blue	tan	0.343903	0.0524798	0.291424	-0.588928	173.518	0.0205029	0.853752	0.96393	0.082506	0.0923179	0.0543104	N	Y	N	N
C17orf100	ENSG00000256806.4	lincRNA	chr17	6651718	6693202	+	Cytokinetic bridge;Cytosol;Nucleus	non-IFN			0.937039	0.940621	0.867065	0.996252	grey	yellow	0.133447	0.0372893	0.0961575	0.519532	7.54332	-0.00828672	0.967847	0.993692	-0.140086	-0.0909632	-0.145105	N	N	N	N
C17orf49	ENSG00000258315.5	protein_coding	chr17	7014495	7017525	+		non-IFN			17.141	16.2221	17.8308	17.1811	turquoise	black	0.119044	0.120544	-0.0015006	-0.711802	26.9845	-0.0931263	0.358896	0.746983	0.125996	0.169324	-0.0439327	N	N	N	N
C17orf58	ENSG00000186665.9	protein_coding	chr17	67991101	67996431	-	Cytosol;Plasma membrane	non-IFN			3.72743	3.78	3.2273	4.1316	turquoise	greenyellow	0.566229	0.0268974	0.539332	1.40023	70.8884	-0.250887	0.157526	0.536018	-0.258446	-0.113258	-0.310469	N	Y	N	N
C17orf62	ENSG00000178927.17	protein_coding	chr17	82442589	82450829	-	Cell Junctions;Plasma membrane	non-IFN			148.688	153.007	152.666	142.129	blue	turquoise	0.401872	0.468608	-0.0667362	-1.24997	3038.08	0.101636	0.131572	0.498362	-0.0511904	0.143656	-0.351634	N	N	N	N
C17orf75	ENSG00000108666.9	protein_coding	chr17	32324565	32350023	-	Cytosol;Golgi apparatus	non-IFN			4.4895	4.80919	4.28453	4.4447	blue	blue	0.220837	0.0557862	0.165051	0.259875	149.132	0.005605	0.963292	0.992611	-0.270449	-0.193642	-0.245435	N	N	N	N
C17orf80	ENSG00000141219.15	protein_coding	chr17	73232233	73248947	+	Nucleoplasm;Vesicles	non-IFN			3.78021	4.4788	3.75565	3.30875	turquoise	blue	0.28479	0.0679973	0.216793	-0.754579	126.173	0.209055	0.274042	0.677964	-0.0845106	0.000675496	-0.162758	N	N	N	N
C17orf89	ENSG00000224877.3	protein_coding	chr17	81239239	81241281	+	Mitochondria	non-IFN			27.3983	29.5962	22.1592	30.4695	blue	darkred	0.118231	0.0289969	0.0892341	4.42096	188.179	-0.454887	1.23842e-05	0.000498596	-0.230723	-0.102225	-0.120555	Y	N	N	N
C17orf97	ENSG00000187624.8	protein_coding	chr17	410327	431062	+	Cytosol;Nucleoli	non-IFN			0.843684	0.679871	0.676058	1.10722	cyan	grey	0.159108	0.0187214	0.140387	1.6256	24.5209	-0.219826	0.251634	0.65541	0.0102125	0.34345	-0.0914074	N	N	N	N
C18orf21	ENSG00000141428.16	protein_coding	chr18	35972083	35979286	+	Nucleoli;Plasma membrane	non-IFN			15.4034	15.2986	16.6831	14.3482	pink	grey	0.16078	0.0341327	0.126647	-2.11139	170.868	0.187941	0.0536738	0.318094	0.0235417	0.0515629	-0.200118	N	N	N	N
[truncated: 13,329 more rows]
