# Supplementary material for: Multi–cell type gene coexpression network analysis reveals coordinated interferon response and cross–cell type correlations in systemic lupus erythematosus
Source: HighWire-hosted journal article supplement (doi:10.1101/gr.265249.120), 2021-03-05
Supplement: Supplemental_Table_S5.xlsx [file Supplemental_Table_S5.xlsx]

## Sheet: relatedTo-Figure_3G
Supplemental Table S5. Details of Gene Ontology based functional annotations of cell type specific DEGs between IFNpos and IFNneg (related to Figure 3G).
	Cluster	ID	Description	GeneRatio	BgRatio	pvalue	p.adjust	qvalue	geneID	Count
1	B_cell	GO:0022900	electron transport chain	3/12	175/17913	0.000188981	0.0347726	0.0240703	NDUFA8/ETFDH/AKR1B1	3
2	cDC	GO:0006614	SRP-dependent cotranslational protein targeting to membrane	11/198	103/17913	1.87e-08	2.22e-05	2.02e-05	RPSA/RPLP0/RPS3/RPS23/RPL6/RPL22/RPL13A/RPL27A/RPS4X/RPS12/RPL21	11
3	cDC	GO:0006613	cotranslational protein targeting to membrane	11/198	106/17913	2.54e-08	2.22e-05	2.02e-05	RPSA/RPLP0/RPS3/RPS23/RPL6/RPL22/RPL13A/RPL27A/RPS4X/RPS12/RPL21	11
4	cDC	GO:0002228	natural killer cell mediated immunity	9/198	63/17913	2.9e-08	2.22e-05	2.02e-05	GZMB/SH2D1B/SH2D1A/KLRD1/KLRK1/SLAMF6/CRTAM/KLRC2/IL18	9
5	cDC	GO:0045047	protein targeting to ER	11/198	108/17913	3.09e-08	2.22e-05	2.02e-05	RPSA/RPLP0/RPS3/RPS23/RPL6/RPL22/RPL13A/RPL27A/RPS4X/RPS12/RPL21	11
7	cDC	GO:0000184	nuclear-transcribed mRNA catabolic process, nonsense-mediated decay	11/198	118/17913	7.78e-08	3.73e-05	3.39e-05	RPSA/RPLP0/RPS3/RPS23/RPL6/RPL22/RPL13A/RPL27A/RPS4X/RPS12/RPL21	11
9	cDC	GO:0006413	translational initiation	13/198	183/17913	1.28e-07	4.62e-05	4.2e-05	RPSA/RPLP0/RPS3/RPS23/RPL6/EIF3F/RPL22/RPL13A/RPL27A/RPS4X/EIF4E3/RPS12/RPL21	13
13	cDC	GO:0042110	T cell activation	19/198	443/17913	5.03e-07	0.000120624	0.000109616	HLA-DOA/CD7/PRDX2/RPS3/HLA-DPB1/IL7R/KLRK1/SLAMF6/LCK/MAFB/RPL22/ZNF683/XCL1/IRF1/PRKCQ/IL18/ITK/IL1B/HLA-DPA1	19
16	cDC	GO:0032609	interferon-gamma production	9/198	105/17913	2.47e-06	0.000473809	0.00043057	HLA-DPB1/KLRK1/SLAMF6/TLR3/XCL1/IL18/ITK/IL1B/HLA-DPA1	9
44	cDC	GO:0019835	cytolysis	5/198	40/17913	7.54e-05	0.00497832	0.00452401	GZMB/PRF1/GZMA/GZMM/GZMH	5
88	cDC	GO:0048247	lymphocyte chemotaxis	4/198	42/17913	0.00116701	0.0385649	0.0350455	KLRK1/CXCL11/XCL1/ADAM10	4
93	pDC	GO:0034113	heterotypic cell-cell adhesion	6/125	61/17913	4.15e-06	0.00901347	0.00846085	LILRB2/ALOX15/CD44/GCNT2/JUP/ITGB7	6
94	PMN	GO:0042119	neutrophil activation	59/812	499/17913	1.44e-11	6.36e-08	5.53e-08	CEACAM1/ERP44/IMPDH1/ALDOA/DNAJC3/DDX3X/ATP6AP2/PSMD13/LTA4H/PSMA5/SURF4/TUBB4B/STXBP3/BCR/KPNB1/KMT2E/STXBP2/ACPP/RAB3D/PTPRJ/FTL/RNASET2/ADGRE3/HMOX2/PPBP/SIRPA/MVP/CMTM6/GLB1/NAPRT/CYBA/FTH1/SELL/NCKAP1L/LPCAT1/FCGR3B/RAB24/SLC2A3/CXCL1/PECAM1/KCNAB2/LAMTOR2/SYK/HSP90AA1/RHOA/FCGR2B/CPNE3/PSMD7/PGLYRP1/CHI3L1/CYBB/NDUFC2/CD63/MNDA/GSTP1/CPNE1/VCP/GLIPR1/CFP	59
95	PMN	GO:0043312	neutrophil degranulation	57/812	485/17913	4.12e-11	6.36e-08	5.53e-08	CEACAM1/ERP44/IMPDH1/ALDOA/DNAJC3/DDX3X/ATP6AP2/PSMD13/LTA4H/PSMA5/SURF4/TUBB4B/STXBP3/BCR/KPNB1/STXBP2/ACPP/RAB3D/PTPRJ/FTL/RNASET2/ADGRE3/HMOX2/PPBP/SIRPA/MVP/CMTM6/GLB1/NAPRT/CYBA/FTH1/SELL/NCKAP1L/LPCAT1/FCGR3B/RAB24/SLC2A3/CXCL1/PECAM1/KCNAB2/LAMTOR2/SYK/HSP90AA1/RHOA/CPNE3/PSMD7/PGLYRP1/CHI3L1/CYBB/NDUFC2/CD63/MNDA/GSTP1/CPNE1/VCP/GLIPR1/CFP	57
96	PMN	GO:0002446	neutrophil mediated immunity	58/812	499/17913	4.3e-11	6.36e-08	5.53e-08	CEACAM1/ERP44/IMPDH1/ALDOA/DNAJC3/DDX3X/ATP6AP2/PSMD13/LTA4H/PSMA5/SURF4/TUBB4B/STXBP3/BCR/KPNB1/KMT2E/STXBP2/ACPP/RAB3D/PTPRJ/FTL/RNASET2/ADGRE3/HMOX2/PPBP/SIRPA/MVP/CMTM6/GLB1/NAPRT/CYBA/FTH1/SELL/NCKAP1L/LPCAT1/FCGR3B/RAB24/SLC2A3/CXCL1/PECAM1/KCNAB2/LAMTOR2/SYK/HSP90AA1/RHOA/CPNE3/PSMD7/PGLYRP1/CHI3L1/CYBB/NDUFC2/CD63/MNDA/GSTP1/CPNE1/VCP/GLIPR1/CFP	58
97	PMN	GO:0002283	neutrophil activation involved in immune response	57/812	488/17913	5.25e-11	6.36e-08	5.53e-08	CEACAM1/ERP44/IMPDH1/ALDOA/DNAJC3/DDX3X/ATP6AP2/PSMD13/LTA4H/PSMA5/SURF4/TUBB4B/STXBP3/BCR/KPNB1/STXBP2/ACPP/RAB3D/PTPRJ/FTL/RNASET2/ADGRE3/HMOX2/PPBP/SIRPA/MVP/CMTM6/GLB1/NAPRT/CYBA/FTH1/SELL/NCKAP1L/LPCAT1/FCGR3B/RAB24/SLC2A3/CXCL1/PECAM1/KCNAB2/LAMTOR2/SYK/HSP90AA1/RHOA/CPNE3/PSMD7/PGLYRP1/CHI3L1/CYBB/NDUFC2/CD63/MNDA/GSTP1/CPNE1/VCP/GLIPR1/CFP	57
98	PMN	GO:0010498	proteasomal protein catabolic process	43/812	382/17913	3.82e-08	3.7e-05	3.22e-05	TRIM38/NUB1/BIRC2/HSPA5/BAG6/PIAS1/TRIB2/FAM192A/PSMD13/PSMA5/TBL1X/BCAP31/WAC/PSMB4/CDC27/UBAC2/PARK7/SDF2L1/FBXW5/USP7/GABARAPL2/TMF1/PLK3/STUB1/PSMA7/HM13/RNFT1/UBA52/SEC61B/LRRK2/DERL1/RFFL/ANAPC15/RACK1/PSMD4/PSMD7/DNAJB9/RCN3/HSP90B1/NPLOC4/VCP/PCBP2/HERPUD1	43
100	PMN	GO:0034612	response to tumor necrosis factor	34/812	284/17913	2.4e-07	0.000166347	0.000144635	NUB1/GBP3/BIRC2/CASP1/CARD16/TNFSF8/PSMD13/MAP2K7/TANK/PSMA5/INPP5K/PSMB4/BIRC3/TMSB4X/MAP3K14/PSMA7/JAK2/MIR142/KLF2/YBX3/CYBA/RFFL/ZFP36L1/LTB/RACK1/PSMD4/SYK/TNFSF15/PSMD7/YTHDC2/BAG4/CHI3L1/GSTP1/CPNE1	34
101	PMN	GO:0045088	regulation of innate immune response	45/812	440/17913	3.08e-07	0.000186506	0.000162163	CEACAM1/BIRC2/SAMHD1/PIK3AP1/UNC93B1/TREX1/TRIM6/TIFA/PIAS1/PSMD13/ICAM3/MAPKAPK3/TANK/PSMA5/PRKCE/PSMB4/BIRC3/TRAF6/NOD1/MICA/LY96/PSMA7/LILRB1/JAK2/UBA52/CLEC4A/CLEC4E/SERPINB9/RIPK2/CYBA/RBM14/CLEC7A/PSMD4/SYK/FCGR2B/STAT5B/PSMD7/PGLYRP1/NOD2/HSP90B1/MNDA/NPLOC4/BCL10/CDC37/TNIP2	45
103	PMN	GO:1905897	regulation of response to endoplasmic reticulum stress	16/812	83/17913	8.22e-07	0.00039804	0.000346088	HSPA5/BAG6/DNAJC3/BCAP31/TMBIM6/UBAC2/PARK7/ERP29/COPS5/RNFT1/LRRK2/NCK1/RACK1/FCGR2B/DNAJB9/HERPUD1	16
106	PMN	GO:0030041	actin filament polymerization	21/812	145/17913	2.41e-06	0.000795705	0.00069185	PFN1/AIF1/TMOD2/ARF1/ARPC1B/PRKCE/TMSB4X/BRK1/SCIN/JAK2/ARF6/NCK1/NCKAP1L/CORO7/CATIP/RHOA/ACTR3C/BAG4/GRB2/CAPG/HCLS1	21
112	PMN	GO:1903513	endoplasmic reticulum to cytosol transport	9/812	29/17913	3.41e-06	0.00087038	0.000756778	BCAP31/UBAC2/HM13/SEC61B/DERL1/HSP90B1/NPLOC4/VCP/HERPUD1	9
121	PMN	GO:0051100	negative regulation of binding	21/812	162/17913	1.41e-05	0.00234828	0.00204179	HSPA5/CARD16/USP33/EIF4A3/FAM192A/PPP1CA/PPP3CA/TMBIM6/TMSB4X/RSF1/PARK7/MITD1/STUB1/GNL3L/JAK2/MEPCE/LRRK2/GTF2F1/ACTB/DISC1/CPNE1	21
128	PMN	GO:0006914	autophagy	42/812	471/17913	2.37e-05	0.00318786	0.00277179	ATG12/TSPO/USP33/TRIM21/DRAM2/TP53INP2/WAC/TMBIM6/VPS37B/CHMP2B/VPS37C/TBC1D14/ATP6V0D1/PARK7/SPTLC2/NOD1/GABARAPL2/PLK3/STUB1/RAB1B/ATP6V1A/TMEM208/FIS1/VPS4A/LRRK2/CALCOCO2/RIPK2/SCOC/SYNPO2/STK11/CLTC/RAB24/C19orf12/KAT8/LAMTOR2/LAMTOR5/HSP90AA1/ATP6V1G1/SNCA/WDR45/CDC37/VCP	42
129	PMN	GO:0061919	process utilizing autophagic mechanism	42/812	471/17913	2.37e-05	0.00318786	0.00277179	ATG12/TSPO/USP33/TRIM21/DRAM2/TP53INP2/WAC/TMBIM6/VPS37B/CHMP2B/VPS37C/TBC1D14/ATP6V0D1/PARK7/SPTLC2/NOD1/GABARAPL2/PLK3/STUB1/RAB1B/ATP6V1A/TMEM208/FIS1/VPS4A/LRRK2/CALCOCO2/RIPK2/SCOC/SYNPO2/STK11/CLTC/RAB24/C19orf12/KAT8/LAMTOR2/LAMTOR5/HSP90AA1/ATP6V1G1/SNCA/WDR45/CDC37/VCP	42
138	PMN	GO:0071706	tumor necrosis factor superfamily cytokine production	20/812	161/17913	4.18e-05	0.00450169	0.00391413	TSPO/TREX1/CD274/ANGPT1/NOD1/LY96/PTPRJ/LILRB1/SIRPA/JAK2/C5AR2/FRMD8/CLEC4A/LRRK2/RIPK2/CYBA/CYBB/NOD2/GSTP1/BCL10	20
144	PMN	GO:0019882	antigen processing and presentation	24/812	220/17913	6.41e-05	0.00608599	0.00529165	TREX1/PSMD13/PSMA5/ARF1/BCAP31/PSMB4/CAPZB/TRAF6/NOD1/RAB8B/PSMA7/ERAP2/AP2M1/CLEC4A/CYBA/NCF2/CLTC/PSMD4/FCGR2B/SEC24D/PSMD7/DNM2/CYBB/NOD2	24
168	PMN	GO:0019058	viral life cycle	30/812	324/17913	0.000175583	0.0113427	0.00986224	TRIM38/APOBEC3F/TRIM6/TRIM21/DDX3X/INPP5K/VPS37B/FAM111A/CHMP2B/KPNB1/TRIM26/VPS37C/POM121C/CTBP1/DEK/RAB1B/PCBP1/VPS4A/UBA52/CDC42/EPS15/P4HB/TPR/F11R/LAMTOR5/YTHDC2/SIVA1/NUP205/VCP/PCBP2	30
183	PMN	GO:0043488	regulation of mRNA stability	18/812	158/17913	0.000299125	0.0161029	0.0140012	XRN1/HNRNPU/PSMD13/PSMA5/PSMB4/METTL14/ALKBH5/HNRNPD/PSMA7/UBA52/YBX3/CIRBP/ZFP36L1/PSMD4/PSMD7/SET/PARN/YWHAB	18
188	PMN	GO:0099024	plasma membrane invagination	9/812	50/17913	0.000363453	0.0184073	0.0160047	AIF1/XKR8/ARF1/CDC42/NCKAP1L/RHOA/MYH9/ABCA1/FCGR2B	9
224	PMN	GO:0110053	regulation of actin filament organization	22/812	228/17913	0.000712909	0.0263667	0.0229254	PFN1/TMOD2/ARF1/ARPC1B/PRKCE/INPP5K/WASF2/TMSB4X/RHOC/BRK1/SCIN/PXN/ARF6/CDC42/NCK1/NCKAP1L/RHOA/ACTR3C/BAG4/GRB2/CAPG/HCLS1	22
240	PMN	GO:0001911	negative regulation of leukocyte mediated cytotoxicity	5/812	18/17913	0.000988678	0.031601	0.0274765	CEACAM1/MICA/LILRB1/SERPINB9/FCGR2B	5
294	PMN	GO:0033673	negative regulation of kinase activity	22/812	244/17913	0.00172576	0.0415985	0.0361691	CEACAM1/MIDN/AKT1S1/TRIB2/DNAJC3/HNRNPU/INPP5K/CHORDC1/PKN1/PRDX3/CHP1/PARK7/PTPRJ/HHEX/PPP2CA/MVP/NCK1/AIDA/RACK1/IGF1R/GSTP1/SMYD3	22
307	T_cell	GO:0071103	DNA conformation change	20/217	279/17913	2.05e-10	3.19e-07	2.76e-07	TOP2A/CDCA5/CDK1/IPO4/CENPP/CENPW/SMC4/HJURP/CENPM/HIST1H1B/NCAPG/CDC45/GINS2/CENPN/GINS1/SHPRH/CENPA/RUVBL1/CENPU/MCM2	20
308	T_cell	GO:0006323	DNA packaging	17/217	194/17913	2.24e-10	3.19e-07	2.76e-07	TOP2A/CDCA5/CDK1/IPO4/CENPP/CENPW/SMC4/HJURP/CENPM/HIST1H1B/NCAPG/CENPN/SHPRH/CENPA/RUVBL1/CENPU/MCM2	17
316	T_cell	GO:0031145	anaphase-promoting complex-dependent catabolic process	10/217	81/17913	4.91e-08	1.4e-05	1.21e-05	AURKB/CDK1/PSMC3/PTTG1/BUB1B/PSMB10/PLK1/PSMB1/PSMD8/PSMA1	10
321	T_cell	GO:0140014	mitotic nuclear division	15/217	237/17913	2.08e-07	3.95e-05	3.42e-05	MKI67/AURKB/KIF2C/CDCA5/KIF23/KIF11/SMC4/TPX2/BUB1B/NCAPG/PLK1/AURKAIP1/MYBL2/PKMYT1/DLGAP5	15
336	T_cell	GO:0034502	protein localization to chromosome	8/217	82/17913	6.73e-06	0.000632238	0.00054734	AURKB/CDCA5/CDK1/HIST1H1B/BUB1B/PLK1/CENPA/EZH2	8
337	T_cell	GO:0006195	purine nucleotide catabolic process	6/217	39/17913	6.89e-06	0.000632238	0.00054734	NUDT1/ACOT7/PDE4B/PDE4D/NT5C/ADA	6
341	T_cell	GO:0050852	T cell receptor signaling pathway	11/217	180/17913	1.26e-05	0.00100866	0.000873216	PSMC3/PDE4B/PSMB10/FOXP3/PSMB1/PSMD8/PDE4D/ADA/PSMA1/PVRIG/PAK2	11
350	T_cell	GO:0048002	antigen processing and presentation of peptide antigen	11/217	188/17913	1.9e-05	0.0012254	0.00106085	KIF2C/LAG3/KIF23/KIF11/PSMC3/PSMB10/PYCARD/PSMB1/PSMD8/PSMA1/KIF5A	11
404	T_cell	GO:0032663	regulation of interleukin-2 production	5/217	54/17913	0.000486246	0.0141111	0.0122162	HAVCR2/LAG3/PDE4B/FOXP3/PDE4D	5
405	T_cell	GO:0000079	regulation of cyclin-dependent protein serine/threonine kinase activity	6/217	83/17913	0.000512277	0.0145692	0.0126128	CDKN3/CKS2/PLK1/PKMYT1/CASP3/HEXIM2	6
408	T_cell	GO:0006626	protein targeting to mitochondrion	6/217	84/17913	0.000546189	0.015229	0.0131841	TIMM13/BID/AIP/SREBF2/TIMM8B/HSPA4	6
437	T_cell	GO:0006979	response to oxidative stress	14/217	442/17913	0.00102851	0.0223214	0.0193241	PPIF/NUDT1/CDK1/CCNA2/MYB/NDUFS8/ADA/NDUFB4/PRDX1/NME2/CASP3/FER/DHCR24/EZH2	14

## Sheet: relatedTo-Supplemental_Fig_S5H
Supplemental Table S5. Details of Gene Ontology based functional annotations of cell type specific DEGs between IFNpos and IFNneg (related to Figure 3G and Supplemental_Fig_S5H).
	Cluster	ID	Description	GeneRatio	BgRatio	pvalue	p.adjust	qvalue	geneID	Count
1	B_cell	GO:0009615	response to virus	22/51	323/17913	2.03976e-25	1.5237e-22	1.2303e-22	IFI44L/IFI44/IFIT3/RSAD2/EIF2AK2/IFIT1/IFITM1/PARP9/IFI6/MX1/HERC5/TRIM22/STAT1/DDX60/OAS3/ISG15/IFITM3/IFIT2/DHX58/OASL/DTX3L/IRF7	22
2	B_cell	GO:0060337	type I interferon signaling pathway	15/51	91/17913	3.17526e-23	7.9064e-21	6.38395e-21	IFIT3/RSAD2/IFIT1/XAF1/IFITM1/IFI6/MX1/USP18/STAT1/OAS3/ISG15/IFITM3/IFIT2/OASL/IRF7	15
3	B_cell	GO:0071357	cellular response to type I interferon	15/51	91/17913	3.17526e-23	7.9064e-21	6.38395e-21	IFIT3/RSAD2/IFIT1/XAF1/IFITM1/IFI6/MX1/USP18/STAT1/OAS3/ISG15/IFITM3/IFIT2/OASL/IRF7	15
7	B_cell	GO:0045071	negative regulation of viral genome replication	9/51	59/17913	6.58542e-14	7.02759e-12	5.67436e-12	RSAD2/EIF2AK2/IFIT1/IFITM1/MX1/OAS3/ISG15/IFITM3/OASL	9
43	B_cell	GO:0035563	positive regulation of chromatin binding	2/51	13/17913	0.000607589	0.0103152	0.00832891	PARP9/DTX3L	2
44	B_cell	GO:2001034	positive regulation of double-strand break repair via nonhomologous end joining	2/51	13/17913	0.000607589	0.0103152	0.00832891	PARP9/DTX3L	2
63	B_cell	GO:0006471	protein ADP-ribosylation	2/51	30/17913	0.0032853	0.0371836	0.0300235	PARP9/PARP14	2
67	B_cell	GO:0045648	positive regulation of erythrocyte differentiation	2/51	31/17913	0.0035055	0.0390837	0.0315578	STAT1/ISG15	2
70	cDC	GO:0009615	response to virus	60/430	323/17913	5.09997e-36	1.94768e-32	1.72594e-32	IFITM1/IFIT1/IFI6/DDX60/IFI44L/IFIT3/ISG15/IFI44/IFITM3/RSAD2/STAT1/EIF2AK2/PARP9/HERC5/OAS2/IFIT2/OASL/IRF7/MX2/MX1/OAS1/OAS3/TRIM22/ISG20/BST2/DHX58/DTX3L/GBP1/IFI27/PML/IKBKE/DDX58/IFIH1/RTP4/IFIT5/NLRC5/IFI16/PRF1/TRIM5/STAT2/ADAR/NT5C3A/CXCL10/APOBEC3G/IFITM2/PLSCR1/IRF3/APOBEC3A/IL15/APOBEC3H/TLR3/APOBEC3B/XCL1/IRF1/MICB/APOBEC3D/SPON2/LGALS9/IL1B/AIM2	60
72	cDC	GO:0060337	type I interferon signaling pathway	34/430	91/17913	7.51584e-32	7.17574e-29	6.35879e-29	IFITM1/IFIT1/IFI6/IFIT3/ISG15/IFITM3/RSAD2/STAT1/XAF1/USP18/OAS2/IFIT2/OASL/IRF7/MX2/MX1/OAS1/IFI35/OAS3/ISG20/BST2/IFI27/SP100/IKBKE/NLRC5/GBP2/STAT2/ADAR/IFITM2/PSMB8/IRF3/HLA-E/MYD88/IRF1	34
79	cDC	GO:0006413	translational initiation	34/430	183/17913	9.61364e-21	3.67145e-18	3.25346e-18	EIF2AK2/EIF3L/RPL5/EIF4B/RPL3/RPS2/RPL15/RPS3A/RPSA/RPS14/RPL7/RPLP0/RPL4/RPL10/RPS3/EIF3D/RPS23/RPL7A/RPS6/RPLP1/RPL6/EIF3F/EIF1/RPL22/RPL13A/RPL27A/RPS4X/RPL13/EIF4E3/RPL23/EIF2S3/RPS16/RPS12/RPL21	34
80	cDC	GO:0006614	SRP-dependent cotranslational protein targeting to membrane	26/430	103/17913	1.12981e-19	3.9225e-17	3.47593e-17	RPL5/RPL3/RPS2/RPL15/RPS3A/RPSA/RPS14/RPL7/RPLP0/RPL4/RPL10/RPS3/RPS23/RPL7A/RPS6/RPLP1/RPL6/RPL22/RPL13A/RPL27A/RPS4X/RPL13/RPL23/RPS16/RPS12/RPL21	26
81	cDC	GO:0045071	negative regulation of viral genome replication	21/430	59/17913	1.33928e-19	4.26226e-17	3.777e-17	IFITM1/IFIT1/ISG15/IFITM3/RSAD2/EIF2AK2/OASL/MX1/OAS1/OAS3/ISG20/BST2/IFIT5/IFI16/APOBEC3G/IFITM2/PLSCR1/APOBEC3A/APOBEC3H/PARP10/APOBEC3D	21
89	cDC	GO:0000184	nuclear-transcribed mRNA catabolic process, nonsense-mediated decay	26/430	118/17913	4.48284e-18	8.55998e-16	7.58543e-16	RPL5/RPL3/RPS2/RPL15/RPS3A/RPSA/RPS14/RPL7/RPLP0/RPL4/RPL10/RPS3/RPS23/RPL7A/RPS6/RPLP1/RPL6/RPL22/RPL13A/RPL27A/RPS4X/RPL13/RPL23/RPS16/RPS12/RPL21	26
109	cDC	GO:0032606	type I interferon production	19/430	125/17913	1.47833e-10	1.41144e-08	1.25075e-08	ISG15/STAT1/HERC5/IRF7/ZBP1/DHX58/UBE2L6/NMI/IKBKE/DDX58/IFIH1/NLRC5/IFI16/IRF3/AZI2/UBA7/TLR3/MYD88/IRF1	19
112	cDC	GO:0002478	antigen processing and presentation of exogenous peptide antigen	20/430	174/17913	7.45189e-09	6.61832e-07	5.86483e-07	TAP1/PSMB9/HLA-DOA/TAP2/PSME2/PSMB8/HLA-DRA/PSME1/B2M/LNPEP/HLA-DQA2/HLA-DPB1/HLA-E/FCGR1B/FCGR1A/AP1S3/PSMC2/PSMA3/CTSL/HLA-DPA1	20
118	cDC	GO:1903706	regulation of hemopoiesis	33/430	468/17913	3.54387e-08	2.76205e-06	2.44759e-06	ISG15/STAT1/EIF2AK2/IRF7/MOV10/PSMB9/HLA-DOA/PSME2/HIST1H3H/CCR1/AXL/PRDX2/PSMB8/PSME1/B2M/IL7R/IL15/TRIM58/MAFB/DLL1/TLR3/ETS1/ZNF683/ATP11C/IRF1/CDC73/PRKCQ/PSMC2/IL18/PSMA3/RBM15/LGALS9/SETD1A	33
250	cDC	GO:0032200	telomere organization	12/430	167/17913	0.000723294	0.0152611	0.0135236	SP100/PML/HIST1H3H/BRCA2/HNRNPA1/CCNE2/NEK2/PRKCQ/ERCC1/DNA2/SMC6/PRIM1	12
266	cDC	GO:0002688	regulation of leukocyte chemotaxis	9/430	105/17913	0.000957893	0.0185695	0.0164554	STAP1/CXCL10/CCR1/DYSF/KLRK1/XCL1/ADAM10/C3AR1/LGALS9	9
304	cDC	GO:0150078	positive regulation of neuroinflammatory response	4/430	24/17913	0.0023769	0.0386272	0.0342296	STAP1/C1QA/IL18/IL1B	4
313	cDC	GO:0035336	long-chain fatty-acyl-CoA metabolic process	4/430	25/17913	0.00277666	0.0429314	0.0380437	ELOVL3/ELOVL6/ACSL1/FAR2	4
332	cMo	GO:0060337	type I interferon signaling pathway	35/343	91/17913	9.17202e-37	1.59868e-33	1.39704e-33	MX2/IFI6/OASL/IFITM1/ISG15/IFITM3/IFIT1/XAF1/IFIT3/OAS2/IRF7/RSAD2/OAS3/IFIT2/MX1/ISG20/IFI35/SP100/ADAR/OAS1/IFITM2/STAT1/IFI27/USP18/BST2/STAT2/MYD88/HLA-E/GBP2/HLA-F/PSMB8/HLA-H/HLA-A/IRF5/FADD	35
333	cMo	GO:0071357	cellular response to type I interferon	35/343	91/17913	9.17202e-37	1.59868e-33	1.39704e-33	MX2/IFI6/OASL/IFITM1/ISG15/IFITM3/IFIT1/XAF1/IFIT3/OAS2/IRF7/RSAD2/OAS3/IFIT2/MX1/ISG20/IFI35/SP100/ADAR/OAS1/IFITM2/STAT1/IFI27/USP18/BST2/STAT2/MYD88/HLA-E/GBP2/HLA-F/PSMB8/HLA-H/HLA-A/IRF5/FADD	35
334	cMo	GO:0009615	response to virus	55/343	323/17913	2.99561e-36	3.4809e-33	3.04186e-33	MX2/IFI6/EIF2AK2/OASL/IFITM1/ISG15/PARP9/IFI44L/IFITM3/IFIT1/IFI44/IFIT3/OAS2/PML/IRF7/RSAD2/OAS3/TRIM22/IFIT2/LGALS9/MX1/ISG20/DDX60/DHX58/APOBEC3B/ADAR/APOBEC3A/APOBEC3G/OAS1/IFITM2/STAT1/IFI27/IFIT5/PLSCR1/BST2/STAT2/DDX58/HERC5/DTX3L/IFIH1/GBP1/ZC3HAV1/RTP4/IFNGR2/TRIM5/IL27/TPT1/IL15/IFI16/URI1/CLU/IRF5/CXCL10/FADD/RNF216	55
341	cMo	GO:0045069	regulation of viral genome replication	26/343	95/17913	3.80094e-23	1.22677e-20	1.07204e-20	EIF2AK2/OASL/IFITM1/ISG15/IFITM3/IFIT1/RSAD2/OAS3/MX1/ISG20/ADAR/APOBEC3A/APOBEC3G/OAS1/IFITM2/IFI27/IFIT5/PLSCR1/BST2/ZC3HAV1/PARP10/CCNK/IFI16/APOBEC3C/PABPC1/STOM	26
342	cMo	GO:0045071	negative regulation of viral genome replication	22/343	59/17913	3.87105e-23	1.22677e-20	1.07204e-20	EIF2AK2/OASL/IFITM1/ISG15/IFITM3/IFIT1/RSAD2/OAS3/MX1/ISG20/APOBEC3A/APOBEC3G/OAS1/IFITM2/IFIT5/PLSCR1/BST2/ZC3HAV1/PARP10/CCNK/IFI16/APOBEC3C	22
352	cMo	GO:0042590	antigen processing and presentation of exogenous peptide antigen via MHC class I	18/343	78/17913	5.75557e-15	9.55425e-13	8.34919e-13	TAP1/B2M/PSMA4/PSME1/HLA-E/PSME2/PSMB9/PSMA6/HLA-F/PSMB8/PSMB3/FCGR1B/TAPBP/PSMB6/HLA-H/IFI30/HLA-A/FCGR1A	18
357	cMo	GO:0006413	translational initiation	22/343	183/17913	7.13802e-12	9.57043e-10	8.36333e-10	EIF2AK2/EIF4B/EIF3L/EIF1/RPL5/RPL15/RPS3A/RPS6/RPL4/RPL10/RPL7/RPLP1/RPL23/MTFMT/EIF3D/EIF2S3/PABPC1/RPS14/RPS2/RPL10A/RPS10/RPL3	22
372	cMo	GO:0006614	SRP-dependent cotranslational protein targeting to membrane	14/343	103/17913	1.01141e-08	8.59941e-07	7.51478e-07	RPL5/RPL15/RPS3A/RPS6/RPL4/RPL10/RPL7/RPLP1/RPL23/RPS14/RPS2/RPL10A/RPS10/RPL3	14
401	cMo	GO:0010972	negative regulation of G2/M transition of mitotic cell cycle	10/343	85/17913	5.09211e-06	0.000253587	0.000221603	CUL1/PSMA4/PSME1/PSME2/PSMB9/PSMA6/PSMB8/RBX1/PSMB3/PSMB6	10
406	cMo	GO:1902036	regulation of hematopoietic stem cell differentiation	9/343	72/17913	9.17653e-06	0.00042463	0.000371072	EIF2AK2/PSMA4/PSME1/PSME2/PSMB9/PSMA6/PSMB8/PSMB3/PSMB6	9
451	cMo	GO:1905330	regulation of morphogenesis of an epithelium	12/343	181/17913	0.000197784	0.00574562	0.00502093	STAT1/PSMA4/PSME1/PSME2/PSMB9/PSMA6/PSMB8/PSMB3/PSMB6/PHB2/NKD1/CXCL10	12
456	cMo	GO:0043488	regulation of mRNA stability	11/343	158/17913	0.000237719	0.00654415	0.00571875	MYD88/PSMA4/PSME1/PSME2/PSMB9/PSMA6/PSMB8/PSMB3/MOV10/PABPC1/PSMB6	11
533	cMo	GO:0035563	positive regulation of chromatin binding	3/343	13/17913	0.0017258	0.0294909	0.0257713	PARP9/DTX3L/HMBOX1	3
534	cMo	GO:1900225	regulation of NLRP3 inflammasome complex assembly	3/343	13/17913	0.0017258	0.0294909	0.0257713	EIF2AK2/GBP5/MEFV	3
548	cMo	GO:0034101	erythrocyte homeostasis	8/343	120/17913	0.0021834	0.0347537	0.0303702	ISG15/ADAR/STAT1/B2M/AXL/RPS6/FAM210B/RPS14	8
551	cMo	GO:0070661	leukocyte proliferation	13/343	270/17913	0.00220134	0.0347537	0.0303702	LGALS9/BST2/TNFSF13B/HLA-E/IL27/RPS6/TCIRG1/CD38/IL15/IL10/SATB1/CLU/FADD	13
581	pDC	GO:0060337	type I interferon signaling pathway	33/262	91/17913	1.13241e-37	1.78298e-34	1.58717e-34	STAT1/IFI6/IFITM1/OASL/ISG20/RSAD2/ISG15/ADAR/OAS2/BST2/MX1/OAS3/IFIT1/MX2/SP100/MYD88/USP18/IFITM3/HLA-F/IFIT3/IFITM2/IFI35/XAF1/OAS1/HLA-E/IFI27/PSMB8/HLA-A/HLA-H/STAT2/NLRC5/HLA-B/IFIT2	33
582	pDC	GO:0071357	cellular response to type I interferon	33/262	91/17913	1.13241e-37	1.78298e-34	1.58717e-34	STAT1/IFI6/IFITM1/OASL/ISG20/RSAD2/ISG15/ADAR/OAS2/BST2/MX1/OAS3/IFIT1/MX2/SP100/MYD88/USP18/IFITM3/HLA-F/IFIT3/IFITM2/IFI35/XAF1/OAS1/HLA-E/IFI27/PSMB8/HLA-A/HLA-H/STAT2/NLRC5/HLA-B/IFIT2	33
584	pDC	GO:0009615	response to virus	42/262	323/17913	9.75339e-28	7.67836e-25	6.83507e-25	STAT1/EIF2AK2/PARP9/IFI6/IFITM1/IFI16/OASL/ISG20/LGALS9/RSAD2/ISG15/PLSCR1/ADAR/OAS2/BST2/MX1/OAS3/IFI44/IFIT1/MX2/IFITM3/IFIT3/IFITM2/DDX60/IFI44L/HERC5/TRIM22/IFIH1/NT5C3A/DTX3L/TLR7/OAS1/DHX58/IFI27/TRIM25/IFIT5/PSMA2/TRIM5/PML/STAT2/NLRC5/IFIT2	42
588	pDC	GO:1903901	negative regulation of viral life cycle	19/262	85/17913	1.28147e-17	5.04419e-15	4.49021e-15	EIF2AK2/IFITM1/IFI16/OASL/ISG20/RSAD2/ISG15/PLSCR1/BST2/MX1/OAS3/IFIT1/IFITM3/IFITM2/OAS1/TRIM25/IFIT5/TRIM5/PML	19
604	pDC	GO:0002479	antigen processing and presentation of exogenous peptide antigen via MHC class I, TAP-dependent	13/262	75/17913	5.88531e-11	7.72202e-09	6.87394e-09	HLA-F/TAP1/PSME2/HLA-E/NCF4/PSMB9/B2M/PSMA2/PSMB8/PSME1/HLA-A/HLA-H/HLA-B	13
609	pDC	GO:0032480	negative regulation of type I interferon production	9/262	46/17913	1.8342e-08	1.99168e-06	1.77294e-06	ISG15/UBE2L6/HERC5/IFIH1/DHX58/NMI/TRIM25/UBA7/NLRC5	9
636	pDC	GO:0034113	heterotypic cell-cell adhesion	7/262	61/17913	2.93952e-05	0.00165295	0.00147142	LILRB2/ALOX15/CD44/CD58/GCNT2/JUP/ITGB7	7
647	pDC	GO:0000209	protein polyubiquitination	14/262	288/17913	9.26425e-05	0.0043542	0.00387599	FBXO6/HERC6/HERC5/PSME2/RBCK1/DTX3L/NMI/IFI27/PSMB9/PSMA2/TRIM5/PSMB8/PSME1/FBXO44	14
657	pDC	GO:1901532	regulation of hematopoietic progenitor cell differentiation	7/262	85/17913	0.00024696	0.00997254	0.0088773	EIF2AK2/PSME2/PSMB9/PSMA2/PSMB8/PSME1/MIXL1	7
670	pDC	GO:0031146	SCF-dependent proteasomal ubiquitin-dependent protein catabolic process	6/262	69/17913	0.000512707	0.017939	0.0159689	FBXO6/PSME2/PSMB9/PSMA2/PSMB8/PSME1	6
675	pDC	GO:0006914	autophagy	17/262	471/17913	0.000598181	0.0196216	0.0174666	IFI16/RUFY4/NAMPT/TRIM22/TRIM5/MCL1/PRKAG2/MFN1/FOXO3/OPTN/GABARAPL1/MVB12A/STX17/ITPR1/PSAP/WDR24/PACS2	17
676	pDC	GO:0061919	process utilizing autophagic mechanism	17/262	471/17913	0.000598181	0.0196216	0.0174666	IFI16/RUFY4/NAMPT/TRIM22/TRIM5/MCL1/PRKAG2/MFN1/FOXO3/OPTN/GABARAPL1/MVB12A/STX17/ITPR1/PSAP/WDR24/PACS2	17
683	pDC	GO:0035563	positive regulation of chromatin binding	3/262	13/17913	0.000793664	0.0240312	0.021392	PARP9/DTX3L/HMBOX1	3
684	pDC	GO:2001034	positive regulation of double-strand break repair via nonhomologous end joining	3/262	13/17913	0.000793664	0.0240312	0.021392	PARP9/DTX3L/MAD2L2	3
685	pDC	GO:0070665	positive regulation of leukocyte proliferation	8/262	134/17913	0.000803135	0.0240864	0.0214411	CD38/LGALS9/BST2/TNFSF13B/LILRB2/HLA-E/TFRC/EFNB1	8
690	pDC	GO:0051770	positive regulation of nitric-oxide synthase biosynthetic process	3/262	14/17913	0.000999238	0.0286055	0.0254638	STAT1/NAMPT/MAP2K6	3
697	pDC	GO:0032507	maintenance of protein location in cell	5/262	57/17913	0.00145087	0.0390495	0.0347608	SP100/TWF1/PML/JUP/SORL1	5
706	pDC	GO:0006521	regulation of cellular amino acid metabolic process	5/262	61/17913	0.00196622	0.0491399	0.0437431	PSME2/PSMB9/PSMA2/PSMB8/PSME1	5
707	PMN	GO:0051607	defense response to virus	66/1062	231/17913	7.7403e-28	3.97619e-24	3.30389e-24	IRF7/HERC5/PARP9/IFIH1/OASL/DDX58/DDX60/TRIM22/EIF2AK2/IFIT1/NT5C3A/RSAD2/ISG15/PLSCR1/TRIM5/RTP4/IFIT5/TRIM38/OAS2/IFI44L/OAS3/IFI16/OAS1/MX1/PML/APOBEC3G/BST2/APOBEC3A/MX2/STAT1/GBP1/IFI27/GBP3/IRF5/BIRC2/APOBEC3B/SAMHD1/DHX58/DTX3L/ADAR/IFITM3/UNC93B1/IFI6/APOBEC3F/TRIM56/ZC3HAV1/NLRC5/STAT2/TREX1/TRIM6/IRF9/TRAF3IP2/DNAJC3/DDX21/BIRC3/FAM111A/LYST/MICA/AIM2/ISG20/MAP3K14/LILRB1/TRIM25/MICB/NP…	66
709	PMN	GO:0034341	response to interferon-gamma	49/1062	173/17913	8.62355e-21	1.47664e-17	1.22696e-17	PARP14/IRF7/PARP9/SP100/OASL/TRIM22/MT2A/TRIM5/TRIM38/OAS2/GBP4/OAS3/NUB1/OAS1/PML/BST2/STAT1/GBP1/IRF5/NMI/CASP1/IFITM1/IFITM3/NLRC5/IRF9/PIAS1/TRIM21/GBP5/AIF1/LGALS9/STXBP3/TRIM26/GBP2/GCH1/STXBP2/PTAFR/SOCS1/SIRPA/JAK2/CALCOCO2/CD58/TRIM25/B2M/SNCA/GAPDH/IFI30/WAS/KYNU/CDC37	49
714	PMN	GO:0043900	regulation of multi-organism process	77/1062	408/17913	5.91773e-20	3.79992e-17	3.15742e-17	HERC5/PARP9/OASL/DDX58/DDX60/EIF2AK2/IFIT1/RSAD2/TRIM14/ISG15/PLSCR1/TRIM5/IFIT5/TRIM38/PARP10/OAS3/IFI16/OAS1/MX1/PML/APOBEC3G/BST2/APOBEC3A/STAT1/IFI27/PABPC1/BIRC2/IFITM1/DHX58/DYNLT1/DTX3L/ADAR/IFITM3/APOBEC3F/ZC3HAV1/TRIM6/LAMP3/CARD16/TRIM21/TRAF3IP2/DDX3X/LGALS9/INPP5K/BIRC3/POLR2E/VPS37B/FAM111A/LHFPL2/CHMP2B/TRIM26/RSF1/TRAF6/NOD1/AIM2/LY96/PTAFR/ISG20/STOM/LILRB1/VPS4A/POLR2L/GTF2B/RIPK…	77
728	PMN	GO:0032606	type I interferon production	32/1062	125/17913	1.02882e-12	2.4023e-10	1.99612e-10	IRF7/HERC5/IFIH1/DDX58/ISG15/TRIM38/ZBP1/IFI16/AZI2/STAT1/UBE2L6/IRF5/NMI/DHX58/TRIM56/NLRC5/TREX1/TRIM21/DDX3X/UBA7/POLR2E/LILRB1/SIRPA/POLR2L/RIPK2/REL/TRIM25/SYK/POLR3GL/IL10/NPLOC4/PCBP2	32
730	PMN	GO:0042119	neutrophil activation	71/1062	499/17913	5.00481e-12	1.07124e-09	8.90111e-10	BST2/TNFAIP6/CEACAM1/DYNLT1/ERP44/LAMTOR1/IMPDH1/ALDOA/DNAJC3/DDX3X/ATP6AP2/PSMD13/LTA4H/PSMA5/SURF4/TUBB4B/STXBP3/BCR/KPNB1/KMT2E/STXBP2/PTAFR/ACPP/RAB3D/PTPRJ/FTL/STOM/RNASET2/ADGRE3/HMOX2/PPBP/SIRPA/MVP/CMTM6/GLB1/C3AR1/NAPRT/CYBA/FTH1/SELL/NCKAP1L/CD58/LPCAT1/FCGR3B/RAB24/SLC2A3/B2M/CXCL1/PECAM1/KCNAB2/LAMTOR2/SYK/HSP90AA1/RHOA/ITGB2/FCGR2B/CPNE3/PSMD7/PGLYRP1/CHI3L1/CYBB/NDUFC2/CD63/MNDA/RHO…	71
733	PMN	GO:0002446	neutrophil mediated immunity	70/1062	499/17913	1.38442e-11	2.63398e-09	2.18862e-09	BST2/TNFAIP6/CEACAM1/DYNLT1/ERP44/LAMTOR1/IMPDH1/ALDOA/DNAJC3/DDX3X/ATP6AP2/PSMD13/LTA4H/PSMA5/SURF4/TUBB4B/STXBP3/BCR/KPNB1/KMT2E/STXBP2/PTAFR/ACPP/RAB3D/PTPRJ/FTL/STOM/RNASET2/ADGRE3/HMOX2/PPBP/SIRPA/MVP/CMTM6/GLB1/C3AR1/NAPRT/CYBA/FTH1/SELL/NCKAP1L/CD58/LPCAT1/FCGR3B/RAB24/SLC2A3/B2M/CXCL1/PECAM1/KCNAB2/LAMTOR2/SYK/HSP90AA1/RHOA/ITGB2/CPNE3/PSMD7/PGLYRP1/CHI3L1/CYBB/NDUFC2/CD63/MNDA/RHOG/GSTP1…	70
735	PMN	GO:0010498	proteasomal protein catabolic process	57/1062	382/17913	1.03779e-10	1.83831e-08	1.52749e-08	FBXO6/TRIM38/NUB1/PML/RBCK1/IFI27/BIRC2/LAMP3/HSPA5/BAG6/PIAS1/TRIB2/CD2AP/FAM192A/USP25/PSMD13/PSMB9/PSMA5/TBL1X/BCAP31/WAC/PSMB4/CDC27/PSME2/UBAC2/PARK7/SDF2L1/FBXW5/USP7/GABARAPL2/PSMB3/TMF1/PLK3/STUB1/PSMA7/HM13/RNFT1/UBA52/TOR1A/SEC61B/LRRK2/DERL1/RFFL/TRIM25/ANAPC15/RACK1/PSMD4/PSME1/PSMD7/DNAJB9/RCN3/HSP90B1/CRBN/NPLOC4/VCP/PCBP2/HERPUD1	57
738	PMN	GO:0050663	cytokine secretion	41/1062	230/17913	2.0566e-10	3.30149e-08	2.74326e-08	IFIH1/DDX58/ISG15/PML/GBP1/LCP2/CARD17/CASP1/MDK/FFAR2/TRIM6/CARD16/BTN2A2/BTN3A1/GBP5/AIF1/MIR24-2/LGALS9/BTN3A2/CD274/ANGPT1/TMSB4X/AIM2/SOCS1/ZBTB7B/C5/LILRB1/C5AR2/FRMD8/CLEC4E/LRRK2/RIPK2/CD58/SYK/ABCA1/FCGR2B/GAPDH/IL10/MAPKBP1/CHI3L1/NOD2	41
762	PMN	GO:0051100	negative regulation of binding	28/1062	162/17913	2.92836e-07	2.68625e-05	2.23205e-05	IFIT2/SP100/IFIT1/IFI16/HSPA5/CARD16/USP33/EIF4A3/FAM192A/PPP1CA/PPP3CA/TMBIM6/TMSB4X/RSF1/PARK7/MITD1/STUB1/GNL3L/JAK2/MEPCE/LRRK2/GTF2F1/ACTB/B2M/DISC1/SORL1/IL10/CPNE1	28
767	PMN	GO:0002474	antigen processing and presentation of peptide antigen via MHC class I	20/1062	95/17913	5.85314e-07	4.92911e-05	4.09568e-05	TAP1/PSMD13/PSMB9/PSMA5/BCAP31/PSMB4/PSME2/PSMB3/PSMA7/ERAP2/CLEC4A/CYBA/NCF2/B2M/PSMD4/PSME1/SEC24D/PSMD7/IFI30/CYBB	20
777	PMN	GO:0061919	process utilizing autophagic mechanism	55/1062	471/17913	1.15355e-06	8.34615e-05	6.93496e-05	TRIM22/TRIM5/ATG12/IFI16/RUBCN/LAMTOR1/TSPO/LAMP3/PRKAG2/USP33/STX17/TRIM21/DRAM2/TP53INP2/WAC/TMBIM6/VPS37B/CHMP2B/VPS37C/ATP6V0B/TBC1D14/ATP6V0D1/PARK7/SPTLC2/NOD1/GABARAPL2/PLK3/RAB8A/STUB1/RAB1B/ATP6V1A/TMEM208/FIS1/VPS4A/LRRK2/CALCOCO2/RIPK2/WDR24/SCOC/SYNPO2/STK11/CLTC/RAB24/C19orf12/KAT8/LAMTOR2/LAMTOR5/HSP90AA1/ATP6V1G1/SNCA/GAPDH/IL10/WDR45/CDC37/VCP	55
780	PMN	GO:1905897	regulation of response to endoplasmic reticulum stress	18/1062	83/17913	1.34697e-06	9.35055e-05	7.76953e-05	HSPA5/BAG6/DNAJC3/USP25/BCAP31/TMBIM6/UBAC2/PARK7/BAK1/ERP29/COPS5/RNFT1/LRRK2/NCK1/RACK1/FCGR2B/DNAJB9/HERPUD1	18
807	PMN	GO:0030041	actin filament polymerization	23/1062	145/17913	1.43876e-05	0.000731773	0.000608043	PFN1/AIF1/TMOD2/ARF1/ARPC1B/PRKCE/RICTOR/TMSB4X/BRK1/SCIN/JAK2/ARF6/NCK1/NCKAP1L/CORO7/CATIP/RHOA/ACTR3C/BAG4/WAS/GRB2/CAPG/HCLS1	23
813	PMN	GO:0043488	regulation of mRNA stability	24/1062	158/17913	1.98958e-05	0.000951728	0.000790807	PABPC1/MOV10/XRN1/HNRNPU/PSMD13/PSMB9/PSMA5/PSMB4/PSME2/PSMB3/METTL14/ALKBH5/HNRNPD/PSMA7/UBA52/YBX3/CIRBP/ZFP36L1/PSMD4/PSME1/PSMD7/SET/PARN/YWHAB	24
859	PMN	GO:0000086	G2/M transition of mitotic cell cycle	30/1062	238/17913	7.74873e-05	0.00260165	0.00216175	TUBA1A/NBN/PPP1CB/CEP63/PSMD13/PSMB9/SSNA1/PSMA5/TUBB4B/CNTRL/CCNY/PSMB4/MASTL/PSME2/PSMB3/PLK3/FOXN3/SYF2/PSMA7/VPS4A/BACH1/AKAP9/OFD1/FHL1/PSMD4/HSP90AA1/PSME1/NEDD1/PSMD7/DNM2	30
913	PMN	GO:1903706	regulation of hemopoiesis	47/1062	468/17913	0.000287188	0.00712697	0.00592192	IRF7/EIF2AK2/ISG15/STAT1/CEACAM1/MOV10/MDK/CCR1/BTN2A2/PSMD13/PSMB9/N4BP2L2/PSMA5/LGALS9/FANCA/PSMB4/KMT2E/PSME2/TRAF6/CLPTM1/HIST1H4H/PSMB3/ASH2L/SOCS1/SCIN/ZBTB7B/PSMA7/LILRB1/HIST1H4C/PRELID1/H3F3B/RIPK2/EVI2B/ZFP36L1/NCKAP1L/B2M/PSMD4/SYK/RHOA/PSME1/FCGR2B/STAT5B/PSMD7/CNOT4/RASSF2/PRDM1/HCLS1	47
957	PMN	GO:0099024	plasma membrane invagination	10/1062	50/17913	0.00060143	0.012309	0.0102277	AIF1/XKR8/ARF1/CDC42/NCKAP1L/RHOA/ITGB2/MYH9/ABCA1/FCGR2B	10
1014	PMN	GO:0032469	endoplasmic reticulum calcium ion homeostasis	6/1062	21/17913	0.00107465	0.0179236	0.014893	PML/BCAP31/TMBIM6/BAK1/FIS1/HERPUD1	6
1015	PMN	GO:1905475	regulation of protein localization to membrane	22/1062	181/17913	0.0010867	0.0180659	0.0150112	GBP1/PRKCE/INPP5K/GRIPAP1/ZMYND8/STAC3/CHP1/STOM/FIS1/VPS4A/AP2M1/ARF6/NECAB2/CLTC/ACTB/AKT2/RER1/RACK1/ITGB2/RHOG/ACSL3/YWHAB	22
1091	PMN	GO:0110053	regulation of actin filament organization	25/1062	228/17913	0.00224816	0.0299969	0.0249249	PFN1/PPM1F/TMOD2/ARF1/ARPC1B/PRKCE/INPP5K/RICTOR/WASF2/TMSB4X/RHOC/BRK1/SCIN/PXN/ARF6/CDC42/NCK1/NCKAP1L/RHOA/ACTR3C/BAG4/WAS/GRB2/CAPG/HCLS1	25
1127	PMN	GO:1905244	regulation of modification of synaptic structure	4/1062	11/17913	0.00289585	0.0353348	0.0293603	CHMP2B/GRIPAP1/RHOA/BAIAP2	4
1151	PMN	GO:0051881	regulation of mitochondrial membrane potential	11/1062	73/17913	0.00365146	0.0421518	0.0350247	TSPO/IFI6/PRDX3/PARK7/BAK1/PRELID1/LRRK2/AKT2/RACK1/ABCD1/VCP	11
1182	PMN	GO:0062012	regulation of small molecule metabolic process	40/1062	439/17913	0.00461515	0.0498068	0.0413853	CEACAM1/MIDN/TSPO/TREX1/ENO1/PRKAG2/PPP1CB/MTCO2P12/PSMD13/PPP1CA/PSMB9/PSMA5/PRKCE/INPP5K/PSMB4/KPNB1/EGR1/PSME2/TMSB4X/PARK7/POM121C/PSMB3/DNAJC15/PTAFR/PSMA7/SIK1/CLTC/AKT2/TPR/PSMD4/RHOA/PSME1/SCAP/SNCA/PSMD7/ABCD1/SIRT5/NUP205/VCP/PGAM1	40
1185	T_cell	GO:0060337	type I interferon signaling pathway	31/366	91/17913	7.6073e-30	1.34839e-26	1.13269e-26	IFI6/MX2/OAS3/IRF7/MX1/OAS1/IFIT3/RSAD2/IFIT1/USP18/ISG15/ISG20/XAF1/ADAR/IFITM1/IFI35/IFITM3/STAT1/OAS2/OASL/PSMB8/IFI27/MYD88/SP100/IFIT2/BST2/IRF9/HLA-H/IFITM2/STAT2/HLA-A	31
1186	T_cell	GO:0071357	cellular response to type I interferon	31/366	91/17913	7.6073e-30	1.34839e-26	1.13269e-26	IFI6/MX2/OAS3/IRF7/MX1/OAS1/IFIT3/RSAD2/IFIT1/USP18/ISG15/ISG20/XAF1/ADAR/IFITM1/IFI35/IFITM3/STAT1/OAS2/OASL/PSMB8/IFI27/MYD88/SP100/IFIT2/BST2/IRF9/HLA-H/IFITM2/STAT2/HLA-A	31
1188	T_cell	GO:0009615	response to virus	49/366	323/17913	1.48249e-28	1.31386e-25	1.10367e-25	IFI6/MX2/OAS3/IFI44L/IRF7/MX1/OAS1/IFIT3/RSAD2/LGALS9/PLSCR1/IFI44/EIF2AK2/IFIT1/PARP9/HERC5/ISG15/DDX60/ISG20/ADAR/TRIM22/IFITM1/IFITM3/IFI16/STAT1/OAS2/RTP4/IFIT5/OASL/TRIM25/PML/IFI27/IFIT2/DHX58/IFIH1/DTX3L/BST2/TRIM5/APOBEC3A/STMN1/PYCARD/IRF9/FOXP3/TSPAN32/IFITM2/STAT2/MICB/DDX58/DDX21	49
1190	T_cell	GO:0043900	regulation of multi-organism process	44/366	408/17913	1.18311e-19	6.99018e-17	5.87194e-17	OAS3/MX1/OAS1/RSAD2/LGALS9/PLSCR1/EIF2AK2/IFIT1/PARP9/HERC5/LAMP3/ISG15/DDX60/ISG20/ADAR/IFITM1/IFITM3/IFI16/TOP2A/STAT1/IFIT5/OASL/TRIM25/PML/IFI27/HAVCR2/DHX58/DTX3L/BST2/TRIM5/APOBEC3A/PSMC3/KPNA2/CCNK/PYCARD/TSPAN32/GAPDH/IFITM2/MPHOSPH8/ADA/MICB/DDX58/CD55/IL10	44
1203	T_cell	GO:0031145	anaphase-promoting complex-dependent catabolic process	18/366	81/17913	3.59508e-14	6.70766e-12	5.63461e-12	UBE2C/PSME2/PSMB8/AURKB/CDK1/PSMA4/PSMC3/PTTG1/BUB1B/PSMB9/PSMB10/PLK1/PSMB1/PSMD8/PSMB3/PSMA1/PSMA3/PSMA6	18
1204	T_cell	GO:0048002	antigen processing and presentation of peptide antigen	25/366	188/17913	1.06359e-13	1.88521e-11	1.58363e-11	PSME2/PSMB8/CENPE/KIF2C/LAG3/KIF23/KIF11/TAP1/PSMA4/PSMC3/TAP2/PSMB9/HLA-DRA/PSMB10/PYCARD/HLA-H/PSMB1/PSMD8/PSMB3/PSMA1/HLA-A/PSMA3/KIF5A/LNPEP/PSMA6	25
1222	T_cell	GO:1902036	regulation of hematopoietic stem cell differentiation	14/366	72/17913	1.764e-10	1.62222e-08	1.36271e-08	EIF2AK2/PSME2/PSMB8/PSMA4/PSMC3/MYB/PSMB9/PSMB10/PSMB1/PSMD8/PSMB3/PSMA1/PSMA3/PSMA6	14
1237	T_cell	GO:0032606	type I interferon production	16/366	125/17913	5.48934e-09	3.67164e-07	3.08428e-07	IRF7/HERC5/ISG15/IFI16/STAT1/TRIM25/HAVCR2/MYD88/UBE2L6/DHX58/IFIH1/ZBP1/PYCARD/DDX58/IL10/AZI2	16
1266	T_cell	GO:0140014	mitotic nuclear division	19/366	237/17913	4.4331e-07	1.9165e-05	1.60991e-05	UBE2C/MKI67/CENPE/AURKB/KIF2C/CDCA5/NUSAP1/CHMP5/KIF23/KIF11/SMC4/TPX2/BUB1B/NCAPG/PLK1/AURKAIP1/MYBL2/PKMYT1/DLGAP5	19
1306	T_cell	GO:1905330	regulation of morphogenesis of an epithelium	14/366	181/17913	2.19584e-05	0.000638053	0.000535982	STAT1/PSME2/PSMB8/PSMA4/PSMC3/PSMB9/PSMB10/PSMB1/PSMD8/PSMB3/NOG/PSMA1/PSMA3/PSMA6	14
1307	T_cell	GO:0043488	regulation of mRNA stability	13/366	158/17913	2.24477e-05	0.000646969	0.000543471	PSME2/PSMB8/MYD88/PSMA4/PSMC3/PSMB9/PSMB10/PSMB1/PSMD8/PSMB3/PSMA1/PSMA3/PSMA6	13
1327	T_cell	GO:0034502	protein localization to chromosome	9/366	82/17913	4.43149e-05	0.00109095	0.000916425	AURKB/CDCA5/CDK1/BRCA2/HIST1H1B/BUB1B/PLK1/CENPA/EZH2	9
1364	T_cell	GO:0051098	regulation of binding	19/366	368/17913	0.00021839	0.00430108	0.00361302	IFIT1/PARP9/IFI16/AURKB/SP100/BAK1/CDCA5/HMBOX1/IFIT2/DTX3L/ZNF593/NME1/HJURP/PLK1/STMN1/CSNK2B/BAG2/NOG/IL10	19
1407	T_cell	GO:0198738	cell-cell signaling by wnt	22/366	500/17913	0.000655979	0.010428	0.0087598	PSME2/PSMB8/RNF213/ASPM/ARL6/PSMA4/PSMC3/RBX1/FGF9/PSMB9/PSMB10/FOXP3/CSNK2B/PSMB1/PSMD8/PSMB3/RUVBL1/NOG/PSMA1/PSMA3/DIXDC1/PSMA6	22
1437	T_cell	GO:0002260	lymphocyte homeostasis	6/366	60/17913	0.00138017	0.0193388	0.0162451	LGALS9/BAK1/CCNB2/FOXP3/ADA/CASP3	6
1541	T_cell	GO:1905818	regulation of chromosome separation	5/366	52/17913	0.00409862	0.0406991	0.0341884	CENPE/AURKB/BUB1B/PLK1/DLGAP5	5
1543	T_cell	GO:0062012	regulation of small molecule metabolic process	18/366	439/17913	0.00419037	0.041337	0.0347241	PPIF/PSME2/PSMB8/FABP5/CDK1/SCD/PGAM1/PSMA4/PSMC3/SREBF2/PSMB9/PSMB10/PSMB1/PSMD8/PSMB3/PSMA1/PSMA3/PSMA6	18
1548	T_cell	GO:0006890	retrograde vesicle-mediated transport, Golgi to ER	6/366	76/17913	0.00459193	0.0447208	0.0375667	CENPE/KIF2C/KIF23/KIF11/COPE/KIF5A	6
