# Supplementary material for: Multi–cell type gene coexpression network analysis reveals coordinated interferon response and cross–cell type correlations in systemic lupus erythematosus
Source: HighWire-hosted journal article supplement (doi:10.1101/gr.265249.120), 2021-03-05
Supplement: Supplemental_Table_S6.xlsx [file Supplemental_Table_S6.xlsx]

## Sheet: Cell_gene_module_mWGCNA
Supplemental Table S6. Comprehensive details of cell type, gene and corresponding module of mWGCNA based network (related to Figure 4A).
CELL	GENE	MODULE
PMN	CD180	antiquewhite4
cDC	CACNB4	antiquewhite4
cDC	TMEM147-AS1	antiquewhite4
PMN	CTD-2340E1.2	antiquewhite4
PMN	TRIM47	antiquewhite4
PMN	RP11-415F23.2	antiquewhite4
PMN	WWP1	antiquewhite4
cMo	ACTG1	antiquewhite4
PMN	RP11-582J16.4	antiquewhite4
PMN	CAPN15	antiquewhite4
PMN	HIST1H2AJ	antiquewhite4
pDC	CTD-2251F13.1	antiquewhite4
T	RNU6-1	antiquewhite4
PMN	NLRC3	antiquewhite4
cMo	HLTF	antiquewhite4
cMo	LINC00649	antiquewhite4
PMN	BMS1	antiquewhite4
T	CCL3	antiquewhite4
PMN	COX20P1	antiquewhite4
pDC	UBA5	antiquewhite4
pDC	MIR1302-9	antiquewhite4
pDC	RP11-249L21.4	antiquewhite4
PMN	RTN2	antiquewhite4
pDC	GPX7	antiquewhite4
PMN	RP5-994D16.12	antiquewhite4
cDC	RNU6-6P	antiquewhite4
pDC	SMIM19	antiquewhite4
PMN	CTD-2647L4.4	antiquewhite4
PMN	AD000091.3	antiquewhite4
pDC	GTF3C6	antiquewhite4
pDC	PEX7	antiquewhite4
cMo	HMGN1P36	antiquewhite4
pDC	CTD-2047H16.5	antiquewhite4
PMN	KCNMB3	antiquewhite4
cMo	RP11-193H5.2	antiquewhite4
T	MIR378E	antiquewhite4
pDC	CTD-2528A14.3	antiquewhite4
pDC	RP11-203J24.9	antiquewhite4
pDC	RP5-1071N3.1	antiquewhite4
PMN	ZNF626	antiquewhite4
PMN	AC013448.1	antiquewhite4
cMo	HIST1H1D	antiquewhite4
PMN	RP11-544A12.4	antiquewhite4
PMN	RP11-46H11.11	antiquewhite4
PMN	TEX10	antiquewhite4
PMN	C1orf50	antiquewhite4
pDC	COX6CP10	antiquewhite4
cMo	C5orf34	antiquewhite4
cMo	AP000275.65	antiquewhite4
PMN	ANAPC2	antiquewhite4
pDC	CINP	antiquewhite4
PMN	CEP120	antiquewhite4
PMN	CTBP2P1	antiquewhite4
pDC	DPEP2	antiquewhite4
cMo	TPD52L2	antiquewhite4
T	PTCSC3	antiquewhite4
cMo	ACTG1P10	antiquewhite4
T	FAR1-IT1	antiquewhite4
pDC	SLC39A11	antiquewhite4
cMo	DIAPH1	antiquewhite4
PMN	TATDN1	antiquewhite4
cDC	CTD-3032J10.4	antiquewhite4
PMN	NOL11	antiquewhite4
PMN	MRPS18AP1	antiquewhite4
pDC	RSPH10B	antiquewhite4
PMN	PRC1	antiquewhite4
pDC	THOC7	antiquewhite4
PMN	EPS8L2	antiquewhite4
cMo	ATXN10	antiquewhite4
pDC	PLGRKT	antiquewhite4
pDC	RPL36AP45	antiquewhite4
pDC	RP5-902P8.10	antiquewhite4
pDC	MINOS1	antiquewhite4
PMN	GALNT10	antiquewhite4
PMN	CYP2R1	antiquewhite4
pDC	SNORA70F	antiquewhite4
cDC	RP11-160E2.21	antiquewhite4
pDC	NME7	antiquewhite4
pDC	AC003989.3	antiquewhite4
pDC	EEF1A1P3	antiquewhite4
PMN	RP11-460I13.6	antiquewhite4
cMo	GRB2	antiquewhite4
pDC	ERVH-1	antiquewhite4
pDC	RP11-737O24.5	antiquewhite4
cMo	MT-RNR2	antiquewhite4
cDC	RNA5SP37	antiquewhite4
pDC	RN7SL18P	antiquewhite4
cMo	PLPPR2	antiquewhite4
cMo	MTRNR2L8	antiquewhite4
PMN	RP11-96D1.11	antiquewhite4
pDC	RNU6-957P	antiquewhite4
cMo	POTEG	antiquewhite4
cMo	USB1	antiquewhite4
PMN	BRWD1	antiquewhite4
cMo	CEP290	antiquewhite4
pDC	ZNF418	antiquewhite4
pDC	LLNLR-222A1.1	antiquewhite4
pDC	TCEA1P2	antiquewhite4
cMo	RAF1	antiquewhite4
cMo	IDSP1	antiquewhite4
pDC	LRTOMT	antiquewhite4
PMN	ENPP4	antiquewhite4
pDC	RP11-344P13.6	antiquewhite4
PMN	RP11-750H9.7	antiquewhite4
T	RP11-107E5.3	antiquewhite4
pDC	RPL36AL	antiquewhite4
PMN	ARL4A	antiquewhite4
PMN	FAIM	antiquewhite4
pDC	NDUFS1	antiquewhite4
cMo	KANTR	antiquewhite4
cMo	PRH1	antiquewhite4
PMN	RP3-352A20.1	antiquewhite4
T	RNA5SP155	antiquewhite4
pDC	PMF1-BGLAP	antiquewhite4
T	AC021188.4	antiquewhite4
pDC	RP11-2K6.1	antiquewhite4
PMN	RP1-99E18.2	antiquewhite4
PMN	MAGOHB	antiquewhite4
PMN	ZNF589	antiquewhite4
pDC	MS4A14	antiquewhite4
cMo	MTRNR2L12	antiquewhite4
cDC	RN7SKP56	antiquewhite4
PMN	ATPAF1	antiquewhite4
PMN	WDR81	antiquewhite4
pDC	RN7SKP266	antiquewhite4
cDC	BTF3P8	antiquewhite4
pDC	RP11-513M16.8	antiquewhite4
PMN	RP11-666F17.1	antiquewhite4
PMN	ITGA9-AS1	antiquewhite4
PMN	MRPS9	antiquewhite4
cMo	IDS	antiquewhite4
cMo	ACTB	antiquewhite4
PMN	TDP1	antiquewhite4
cMo	WWP2	antiquewhite4
pDC	WASL	antiquewhite4
cMo	SNORA66	antiquewhite4
T	AP5S1	antiquewhite4
PMN	RP11-92G12.3	antiquewhite4
pDC	AC010761.13	antiquewhite4
pDC	AC073264.10	antiquewhite4
pDC	SLC35A3	antiquewhite4
T	PROK2	antiquewhite4
pDC	APOO	antiquewhite4
cMo	UBE2V1	antiquewhite4
T	RP11-667M19.10	antiquewhite4
cMo	ACTBP9	antiquewhite4
cMo	ACTBP11	antiquewhite4
cMo	LRP10	antiquewhite4
cDC	ZNF528-AS1	antiquewhite4
pDC	RP11-452H21.2	antiquewhite4
cMo	MT-ND3	antiquewhite4
cDC	HIST1H1D	antiquewhite4
pDC	AC109829.2	antiquewhite4
pDC	RP11-1250I15.1	antiquewhite4
T	NME8	antiquewhite4
PMN	ESR2	antiquewhite4
T	GPR141	antiquewhite4
T	PLXNC1	antiquewhite4
cMo	RP13-753N3.1	antiquewhite4
cMo	ACTA1	antiquewhite4
cMo	CTC-512J14.7	antiquewhite4
cDC	RP11-464F9.20	antiquewhite4
PMN	ZNF268	antiquewhite4
pDC	BCAP31P1	antiquewhite4
PMN	AC009505.2	antiquewhite4
cMo	POTEI	antiquewhite4
pDC	WDR53	antiquewhite4
PMN	AC006369.2	antiquewhite4
pDC	RBM45	antiquewhite4
cMo	RN7SL731P	antiquewhite4
pDC	EML3	antiquewhite4
cMo	ACTG1P23	antiquewhite4
PMN	AC100830.4	antiquewhite4
pDC	HSPB11	antiquewhite4
cMo	POTEF	antiquewhite4
cMo	LA16c-3G11.7	antiquewhite4
T	RNU6-33P	antiquewhite4
pDC	LSM1	antiquewhite4
pDC	TTC13	antiquewhite4
T	GPR107	antiquewhite4
PMN	SMURF2	antiquewhite4
cMo	FAM98B	antiquewhite4
cMo	ACTBP2	antiquewhite4
cDC	ZNF337-AS1	antiquewhite4
cDC	SDHDP2	antiquewhite4
cMo	RP11-678B3.1	antiquewhite4
cMo	SLC2A6	antiquewhite4
pDC	RNU6-123P	antiquewhite4
cMo	CTD-3184A7.4	antiquewhite4
pDC	RN7SL230P	antiquewhite4
cMo	SAPCD1	antiquewhite4
PMN	RN7SL154P	antiquewhite4
PMN	RP5-902P8.10	antiquewhite4
cMo	RPS4XP1	antiquewhite4
pDC	UPRT	antiquewhite4
cMo	POTEKP	antiquewhite4
pDC	IFT52	antiquewhite4
PMN	RNY4P10	antiquewhite4
cMo	POTEE	antiquewhite4
cMo	POTEJ	antiquewhite4
cMo	ACTG1P14	antiquewhite4
pDC	ECHS1	antiquewhite4
PMN	RP11-96D1.10	antiquewhite4
pDC	RNU6-761P	antiquewhite4
pDC	SNORD14E	antiquewhite4
PMN	CYCSP52	antiquewhite4
PMN	SNORD62A	antiquewhite4
cMo	RP11-156F23.2	bisque4
cMo	OSGEPL1	bisque4
cMo	ESCO1	bisque4
cMo	PPP1R14B	bisque4
B	AC011380.8	bisque4
cMo	CPSF6	bisque4
PMN	IGHVII-30-43	bisque4
cMo	NMRK1	bisque4
pDC	RAB39B	bisque4
cMo	RCCD1	bisque4
cMo	SLC36A4	bisque4
cMo	TXNL4A	bisque4
cMo	RP11-166O4.6	bisque4
cMo	PREX1	bisque4
cMo	MIR1184-3	bisque4
cMo	AC109486.1	bisque4
cMo	CKAP4	bisque4
cMo	RNF187	bisque4
cMo	ZBED5-AS1	bisque4
cMo	KLHL2	bisque4
cMo	HGH1	bisque4
cMo	PACS1	bisque4
cMo	MXI1	bisque4
cMo	URI1	bisque4
pDC	NPIPA5	bisque4
B	TRGV4	bisque4
cMo	YTHDF1	bisque4
T	SNORA24	bisque4
cMo	MIR1184-1	bisque4
cMo	MARS2	bisque4
cMo	RBMS1	bisque4
cMo	TAF6L	bisque4
cDC	RP11-85B7.5	bisque4
cMo	ENDOG	bisque4
T	RP11-155O18.6	bisque4
cDC	RN7SL674P	bisque4
cMo	MPV17L2	bisque4
cMo	FRAT1	bisque4
cMo	MIR1184-2	bisque4
cMo	NDN	bisque4
cMo	PPP1R3D	bisque4
cMo	F8A1	bisque4
cMo	DNAJB14	bisque4
cMo	ZXDC	bisque4
pDC	PIEZO1	bisque4
cMo	F8A3	bisque4
cMo	PRKCB	bisque4
cMo	PPP1R14BP3	bisque4
cMo	MKNK2	bisque4
B	ZAP70	bisque4
T	NUTM2A-AS1	bisque4
cMo	RPS6KA3	bisque4
pDC	AP000344.4	bisque4
PMN	LIG4	bisque4
cMo	SYCP3	bisque4
cMo	CHKA	bisque4
PMN	CBX3P2	bisque4
cMo	DUS1L	bisque4
cMo	GNB1	bisque4
cMo	THRIL	bisque4
cMo	FAF1	bisque4
T	SPATA1	bisque4
cMo	TIGAR	bisque4
cDC	RPL21P7	bisque4
cMo	FAM107B	bisque4
cMo	MAP3K3	bisque4
cMo	ALYREF	bisque4
cMo	CPNE2	bisque4
cMo	EGLN1P1	bisque4
cMo	OSGIN2	bisque4
cMo	SIAH2	bisque4
cMo	GNL1	bisque4
cMo	AP3M2	bisque4
cMo	RBMS1P1	bisque4
pDC	RP1-130H16.18	bisque4
cMo	PTOV1	bisque4
cDC	TWISTNB	bisque4
cMo	SH2B2	bisque4
cMo	RP5-906C1.1	bisque4
cMo	RP11-317N12.1	bisque4
cMo	CEACAM21	bisque4
cMo	HRAS	bisque4
cMo	FRAT2	bisque4
cDC	PTCD3	bisque4
cMo	SRM	bisque4
cMo	EIF3B	bisque4
cMo	PPP6R1	bisque4
cMo	ECI1	bisque4
cMo	GKAP1	bisque4
cMo	MAP2K2	bisque4
cMo	CEBPA	bisque4
cMo	RP3-508I15.19	bisque4
cMo	DVL3	bisque4
cMo	RP11-356C4.3	bisque4
cMo	FBXL6	bisque4
cMo	FYN	bisque4
cMo	SUN2	bisque4
cMo	MXD4	bisque4
cMo	CUL3	bisque4
cMo	SPPL3	bisque4
T	HCG11	bisque4
cMo	OPN3	bisque4
cMo	SPCS1	bisque4
cMo	BRI3	bisque4
cDC	LINC00869	bisque4
cMo	TARBP1	bisque4
cMo	RP11-249L21.4	bisque4
pDC	RPS26P43	bisque4
cMo	RP11-941H19.2	bisque4
cDC	TP73-AS1	bisque4
cDC	IGHVII-30-43	bisque4
cMo	BLOC1S4	bisque4
cMo	CHPT1	bisque4
cMo	FAM50A	bisque4
cMo	HDGF	bisque4
cMo	H1FX	bisque4
cMo	TRAPPC10	bisque4
cMo	GRK6	bisque4
cMo	ZW10	bisque4
PMN	SMC6	bisque4
cMo	VAV3	bisque4
T	BRAF	bisque4
cMo	BLOC1S5-TXNDC5	bisque4
cMo	AC015849.13	bisque4
T	CTC-529I10.1	bisque4
cMo	H1FX-AS1	bisque4
PMN	RP11-102N12.3	bisque4
cDC	LY6G5C	bisque4
pDC	RPSAP3	bisque4
cMo	STARD10	bisque4
PMN	POMK	bisque4
cMo	TBC1D10B	bisque4
cMo	MFSD14C	bisque4
cDC	CACYBP	bisque4
cMo	AC091133.1	bisque4
cMo	ZNF804A	bisque4
cMo	FAM89B	bisque4
PMN	RP11-258F22.1	bisque4
cMo	CDC34	bisque4
cMo	NUDT4P2	bisque4
cMo	AVEN	bisque4
cMo	ARHGAP26	bisque4
cMo	PTP4A2	bisque4
cMo	WHAMM	bisque4
PMN	CBWD7	bisque4
B	RNU6-817P	bisque4
cMo	AC007036.4	bisque4
cDC	RNU12	bisque4
cMo	RP11-123M21.2	bisque4
cMo	PCBP1	bisque4
T	HOTAIRM1_1	bisque4
cMo	RABL6	bisque4
cMo	RP11-680G24.4	bisque4
cMo	UTP14A	bisque4
cMo	MTMR1	bisque4
cMo	JRKL	bisque4
cMo	TFDP1	bisque4
pDC	TMEM14C	bisque4
cMo	ACADVL	bisque4
cMo	MDFIC	bisque4
cMo	GTPBP3	bisque4
cMo	CEBPD	bisque4
cDC	SPRYD7	bisque4
cMo	KCMF1	bisque4
cMo	ABCB10	bisque4
pDC	RP11-406H21.2	bisque4
cMo	PGP	bisque4
cMo	RP4-635E18.9	bisque4
cMo	EMILIN2	bisque4
PMN	CTD-2251F13.1	bisque4
cMo	CD44	bisque4
cMo	CRLS1	bisque4
cMo	DNAJC5	bisque4
T	FAM86HP	bisque4
cMo	RP11-264B14.2	bisque4
pDC	APOPT1	bisque4
cMo	GTF2IP4	bisque4
cMo	CCDC71L	bisque4
PMN	CBWD5	bisque4
cMo	RP11-848P1.4	bisque4
cMo	PPP2R2D	bisque4
pDC	RPL21P129	bisque4
cMo	IER5	bisque4
T	RP11-142L16.2	bisque4
cMo	CEBPB	bisque4
cMo	KCNQ1	bisque4
cMo	TRAM2-AS1	bisque4
cMo	CSNK1G2	bisque4
cMo	GLRX5	bisque4
cMo	CAPN3	bisque4
cMo	SFT2D3	bisque4
cMo	RP11-927P21.4	bisque4
cMo	POLR3H	bisque4
cMo	SIAH2-AS1	bisque4
cMo	LINC00937	bisque4
pDC	CTD-2008P7.5	bisque4
cMo	C8orf82	bisque4
cMo	PRRC2C	bisque4
PMN	MIR7848	bisque4
cMo	AC068533.7	bisque4
cMo	BRI3BP	bisque4
cMo	PTOV1-AS2	bisque4
T	USP13	bisque4
T	AC002310.12	bisque4
cMo	OTUD4	bisque4
pDC	C19orf70	bisque4
cMo	BRD7P2	bisque4
cMo	SDCCAG3	bisque4
cMo	PPIB	bisque4
PMN	CPSF2	bisque4
T	ACTG1P20	bisque4
cMo	PCID2	bisque4
pDC	RP11-897M7.3	bisque4
cMo	CYC1	bisque4
cMo	TPGS1	bisque4
pDC	ENTPD3-AS1	bisque4
cMo	RPS26P34	bisque4
cMo	PTP4A2P2	bisque4
cMo	RP11-217O12.1	bisque4
cMo	MESDC1	bisque4
cMo	MED26	bisque4
T	ZNF713	bisque4
T	CTC-428H11.2	bisque4
PMN	HLA-DQB1-AS1	bisque4
PMN	RN7SL740P	bisque4
cMo	NHP2	bisque4
cMo	HMGN2P27	bisque4
cMo	CBFB	bisque4
cMo	ASXL1	bisque4
cMo	KIAA2013	bisque4
cMo	MICALL1	bisque4
cMo	KLHL2P1	bisque4
cMo	OPHN1	bisque4
cMo	SNORD13	bisque4
cDC	RP11-182E7.1	bisque4
cMo	MAPK1	bisque4
cMo	RP11-543B16.2	bisque4
PMN	KBTBD4	bisque4
cMo	BOLA2	bisque4
cMo	PKN1	bisque4
cMo	EIF4E3	bisque4
cMo	GNAS	bisque4
cMo	RP11-603J24.17	bisque4
cMo	SLC35D2	bisque4
cMo	RBM15B	bisque4
cMo	AP3D1	bisque4
cMo	TOP2B	bisque4
pDC	RP4-761J14.10	bisque4
cMo	PGAM5	bisque4
cMo	FMNL1	bisque4
cDC	COX6A1	bisque4
cMo	GTF2IP1	bisque4
cMo	NBPF11	bisque4
PMN	RNF175	bisque4
cMo	PIGX	bisque4
cMo	FAM215B	bisque4
cDC	ST13P4	bisque4
cDC	PPAT	bisque4
PMN	RN7SL690P	bisque4
T	SNORD14B	bisque4
cMo	ELAVL1	bisque4
cMo	SLC35E1	bisque4
cMo	VPS26B	bisque4
cMo	EID2	bisque4
cMo	ZNF713	bisque4
cDC	FTX_2	bisque4
cMo	TBL1X	bisque4
cMo	KIF13A	bisque4
pDC	FYCO1	bisque4
cMo	TMEM8A	bisque4
cMo	DAZAP1	bisque4
cMo	RP11-848D3.4	bisque4
PMN	LINC01569	bisque4
pDC	MRM3	bisque4
pDC	AC005682.5	bisque4
cMo	AC107081.1	bisque4
cDC	SMIM20	bisque4
cDC	RP11-382A20.4	bisque4
cMo	RP11-144C15.1	bisque4
cMo	FAM3C	bisque4
cMo	KBTBD11	bisque4
cMo	LINC01012	bisque4
PMN	RP11-474G23.3	bisque4
PMN	CBWD3	bisque4
cMo	LINC00598	bisque4
cMo	SCRN1	bisque4
T	CTB-184G21.3	bisque4
cMo	RAB21	bisque4
cMo	SH3GLB2	bisque4
T	RN7SL339P	bisque4
cMo	AC005606.14	bisque4
cMo	STK17A	bisque4
cMo	INPPL1	bisque4
cMo	OTUD5	bisque4
cMo	COMMD1	bisque4
cMo	PTPRA	bisque4
cDC	LAMTOR4	bisque4
T	RP11-147L13.11	bisque4
cMo	RP3-508I15.14	bisque4
cMo	RP11-378E13.4	bisque4
cDC	CTD-2341M24.1	bisque4
cMo	SNRPEP2	bisque4
cMo	PITPNA	bisque4
cMo	NBPF25P	bisque4
cMo	PABPC4	bisque4
cMo	ORAI1	bisque4
cDC	POLE4	bisque4
cMo	RP11-252O18.3	bisque4
cMo	LMO2	bisque4
cMo	SLC25A5P1	bisque4
cDC	COX17P1	bisque4
cMo	OPRL1	bisque4
cMo	RCAN1	bisque4
PMN	AC009961.5	bisque4
PMN	RAB9A	bisque4
pDC	ACSM3	bisque4
cDC	MAPK8	bisque4
cDC	MIF-AS1	bisque4
cMo	RABEPK	bisque4
cMo	CTD-2616J11.9	bisque4
cMo	CLSTN1	bisque4
cDC	RN7SL690P	bisque4
cDC	C3orf14	bisque4
pDC	ZNF32-AS1	bisque4
cMo	RP11-116N8.2	bisque4
cMo	PQLC1	bisque4
cDC	RP11-137N23.1	bisque4
cMo	TRIM8	bisque4
cMo	TLE4	bisque4
cDC	ZNF417	bisque4
cMo	WSB2	bisque4
cMo	PPTC7	bisque4
cDC	SUMO2P3	bisque4
cMo	VOPP1	bisque4
pDC	TTC8	bisque4
cMo	ARRDC2	bisque4
PMN	TGFBR1	bisque4
T	WARS	bisque4
cMo	ADAP1	bisque4
PMN	RPH3AL	bisque4
cMo	IMPAD1	bisque4
cMo	RASAL3	bisque4
cMo	ZNF408	bisque4
cMo	TRAK1	bisque4
cMo	ZBTB7A	bisque4
PMN	RP11-338E21.3	bisque4
cMo	MT-TE	bisque4
cMo	PDCD7	bisque4
cDC	MIF	bisque4
PMN	COX10-AS1	black
T	CENPP	black
B	RP11-927P21.9	black
PMN	AC008065.1	black
cMo	ZCRB1	black
PMN	SRSF3	black
cMo	FAM117A	black
cDC	CD2AP	black
pDC	IFIT5	black
pDC	RP11-298A10.2	black
cDC	USP25	black
cMo	DUX4L37	black
cMo	RP11-837J7.4	black
T	FANCI	black
pDC	C4orf33	black
T	MT-TT	black
pDC	SPATS2L	black
cMo	TMSB10	black
cMo	RP11-499E18.1	black
cMo	TNK2	black
cMo	BCL2L2-PABPN1	black
T	FABP5P1	black
cMo	CTD-2521M24.6	black
pDC	ZNF92	black
cMo	ZEB2	black
cMo	RP11-294J22.6	black
cMo	WDFY1	black
pDC	TNFRSF10B	black
pDC	KLHDC7B	black
PMN	RN7SL834P	black
PMN	RN7SL279P	black
cDC	CTD-2521M24.6	black
cMo	CLYBL	black
cMo	AL133245.2	black
T	SSSCA1	black
cMo	PIEZO1	black
pDC	PPIF	black
cDC	SIGLEC1	black
pDC	OAS3	black
PMN	CHMP4A	black
T	NRIR	black
T	LGALS9	black
cMo	STAC3	black
PMN	RP11-731D1.4	black
cMo	LINC01560	black
PMN	RNU6-652P	black
PMN	CTC-329D1.2	black
cDC	SAMD9L	black
T	ISG15	black
pDC	DDX60	black
pDC	WDFY1	black
pDC	RP11-264B17.2	black
cMo	DRAP1	black
cMo	CTA-212A2.3	black
pDC	APOBEC3A	black
T	NAA38	black
cDC	TMEM123	black
cDC	VRK2	black
T	FAM207A	black
T	MYL6B	black
cMo	BST2	black
PMN	MBIP	black
cDC	HNRNPA1P4	black
cMo	ARHGEF3	black
B	SPATS2L	black
cMo	RP11-36C20.1	black
cDC	ARL17B	black
cDC	IFI44L	black
PMN	ACTR6	black
cMo	HERC6	black
PMN	LGALS3BP	black
cMo	PARP14	black
T	HLA-DRA	black
cMo	XAF1	black
pDC	LGALS3BP	black
cMo	TNFSF13B	black
PMN	PI4K2B	black
cMo	TCIRG1	black
pDC	MT2A	black
T	IFI6	black
cMo	DDX58	black
T	MX1	black
cDC	NCOA7	black
cMo	MIR142	black
T	ATAD2	black
T	AP001610.5	black
cDC	LAP3P2	black
pDC	RP11-932O9.7	black
B	RSAD2	black
cMo	YME1L1	black
PMN	BBX	black
pDC	PARP14	black
cDC	IFI44	black
B	IFI6	black
cDC	LGALS3BP	black
cDC	CUL1	black
cMo	CTC-429P9.3	black
PMN	GBP3	black
pDC	RSAD2	black
T	RP4-681N20.5	black
PMN	AC020550.7	black
cMo	RP13-444K19.1	black
T	DRAP1	black
cDC	RUFY4	black
T	LGALS9DP	black
cDC	RP11-12G12.7	black
cMo	ZNFX1	black
PMN	SIGLEC1	black
cMo	SFT2D2	black
PMN	CEP162	black
T	SERTAD3	black
T	RARRES3	black
T	IRF7	black
T	SPATS2L	black
cMo	KIF3B	black
T	MIS18BP1	black
T	IFI35	black
cMo	NEXN	black
pDC	BTBD1	black
cMo	RP4-725G10.3	black
cMo	ACBD7	black
pDC	CPT1B	black
pDC	TNPO3	black
cMo	HMGB1P8	black
T	RBBP8	black
T	IFI27	black
pDC	ISG15	black
cMo	DOCK8	black
cMo	LY6E	black
cDC	E2F3P2	black
cMo	KIDINS220	black
cMo	OAS3	black
pDC	RPL23AP1	black
T	PLSCR1	black
cMo	IFIT5	black
cMo	USP18	black
cMo	PTP4A1	black
cMo	PSME2	black
cMo	GVINP1	black
PMN	SCOC	black
cMo	APRT	black
T	USP41	black
pDC	CTD-2006C1.2	black
cMo	ACSL4	black
cMo	SNORD59A	black
B	IFIT3	black
cMo	STAT1	black
cMo	PPP1R8	black
pDC	IFITM1	black
cMo	PHACTR2	black
T	MRPL58	black
T	DHX58	black
cMo	APOL2	black
T	DDX60	black
pDC	IFIH1	black
PMN	RP11-1023L17.1	black
PMN	RP11-384M15.3	black
T	PARP9	black
cMo	FKBP14	black
T	CTD-2553L13.10	black
T	ZBP1	black
pDC	IFI44L	black
PMN	AZI2	black
cMo	RP11-73M18.7	black
PMN	REC8	black
T	PSMB9	black
cMo	IFIT1	black
cMo	FANCL	black
pDC	IFI6	black
pDC	CLIC3	black
cMo	PHF2	black
cDC	LAP3	black
PMN	USP18	black
cMo	APOBEC3G	black
pDC	HYI	black
T	HLA-DRB1	black
pDC	TCIRG1	black
pDC	ARHGEF3	black
PMN	MT1G	black
cMo	TMEM123	black
cMo	BISPR	black
T	OAS3	black
cMo	BROX	black
cMo	LRR1	black
cMo	KLHDC7B	black
T	RP11-467L13.5	black
T	PPIAP9	black
cMo	USP41	black
T	LY6E	black
cDC	PNPT1	black
cMo	ISG20	black
T	IFIT1	black
cMo	FAM8A1	black
PMN	TIFA	black
pDC	SAMD9L	black
PMN	ZNF496	black
T	OLA1P1	black
PMN	KLHDC7B	black
PMN	HMGN2P7	black
T	RTN4IP1	black
cDC	RN7SL470P	black
T	PLA2G4C	black
T	CTDSPL2	black
pDC	MNDA	black
B	IFI27	black
pDC	GUF1	black
cMo	OASL	black
T	USP18	black
cMo	AC092933.4	black
pDC	AP002954.4	black
cMo	INSR	black
T	OAS1	black
cMo	TMSB10P1	black
T	MRPL54	black
cMo	ZBP1	black
cMo	ATP13A1	black
cMo	NPM1P37	black
cDC	PHF11	black
cMo	RP1-228H13.2	black
cDC	SEPT7P4	black
cMo	ERP44	black
cMo	RARRES3	black
cMo	CTA-384D8.36	black
cMo	SH3GLB1	black
cMo	TMEM33	black
cDC	ISG15	black
T	STAT1	black
cDC	PLSCR1	black
cMo	TRIM14	black
cMo	IFITM3	black
PMN	CNTRL	black
cMo	APOBEC3B-AS1	black
PMN	APOBEC3G	black
cDC	STAT1	black
cDC	XAF1	black
PMN	TMEM62	black
pDC	CARD16	black
T	OAS2	black
T	IFIT5	black
B	IPCEF1	black
pDC	SETSIP	black
PMN	HMGN1	black
cMo	BLVRA	black
B	MIR3918	black
T	IFITM3	black
pDC	IFITM3	black
PMN	AC015849.19	black
pDC	ENG	black
cMo	NUCB1	black
T	LAP3	black
cMo	SNORA6	black
T	IFITM1	black
PMN	HMGN2P46	black
PMN	RP11-79P5.3	black
PMN	USP25	black
cMo	RP11-73M18.8	black
pDC	LY6E	black
cMo	SCO2	black
cMo	IFITM1	black
T	SYNGR1	black
B	GBP1P1	black
cMo	C16orf72	black
cMo	EVL	black
pDC	IFIT1	black
cMo	GABARAP	black
cDC	USP18	black
PMN	SGTB	black
T	CENPN	black
cMo	SERPING1	black
cMo	IL12RB1	black
cDC	C19orf66	black
pDC	CTD-2240E14.4	black
T	TRAPPC5	black
PMN	LYRM5	black
T	RP11-512F24.1	black
T	TCTEX1D2	black
pDC	SMC6	black
cMo	RP11-703H8.7	black
cMo	EPSTI1	black
PMN	PCGF5	black
pDC	AC009948.5	black
PMN	RP11-43N16.4	black
pDC	AC009950.1	black
cMo	RP11-192H23.6	black
PMN	COX6A1P2	black
cMo	LGALS9	black
cMo	CTB-79E8.3	black
PMN	METTL14	black
pDC	EIF2AK2	black
PMN	RTP4	black
cMo	CREG1	black
cMo	PHF11	black
cMo	IFI44L	black
PMN	FRMD3	black
cMo	MT-TS1	black
PMN	TMSB10	black
cDC	NRG1	black
T	TYMP	black
cDC	MYL12BP2	black
PMN	TRIM14	black
cDC	USP41	black
pDC	SCAI	black
PMN	ZNF528-AS1	black
T	TIMM8BP2	black
cDC	DDX60L	black
cMo	PLSCR1	black
PMN	DNAJC15	black
T	CARD16	black
B	SIGLEC1	black
pDC	KRTCAP2	black
cMo	AC090094.1	black
pDC	NUSAP1	black
PMN	PHACTR2	black
pDC	EPSTI1	black
cMo	RP11-51F16.1	black
cMo	MED14	black
PMN	RP11-525J21.1	black
cMo	MX2	black
cMo	CTD-2231E14.8	black
pDC	MX2	black
pDC	PARP8	black
pDC	AKT2	black
T	LAP3P2	black
cMo	PTPN6	black
cMo	NAPA	black
cMo	SLIRP	black
PMN	CTD-3032J10.4	black
cMo	TAPBP	black
T	MX2	black
cMo	NPTN	black
pDC	NEXN	black
T	ATP6V0B	black
cDC	RP11-609D21.3	black
pDC	HSH2D	black
cMo	IFIH1	black
cMo	SIGLEC1	black
T	CTD-3032J10.4	black
T	HERC6	black
T	EPSTI1	black
PMN	GAPT	black
PMN	USP41	black
pDC	FIG4	black
PMN	ZFP62	black
T	RTP4	black
cMo	GMPR	black
cDC	NT5C3AP1	black
cMo	RN7SL693P	black
cMo	RP3-425C14.4	black
PMN	DHX58	black
cDC	IFI16	black
PMN	BLZF1	black
PMN	HMGN2P8	black
cDC	EPSTI1	black
PMN	SPATS2L	black
cMo	APOBEC3A	black
T	UBE2L6	black
pDC	RP11-326C3.11	black
pDC	KIAA1551	black
T	LGALS9C	black
pDC	USP18	black
cMo	XRRA1	black
cMo	AC009950.1	black
PMN	KIAA1109	black
cMo	VAMP5	black
PMN	C11orf98	black
T	MZT2A	black
pDC	ANKIB1	black
cMo	CTSL	black
pDC	IFI44	black
cMo	HIGD1AP10	black
PMN	LTB	black
cDC	MX1	black
cMo	KIAA1109	black
T	ODF3B	black
PMN	TRMT5	black
cMo	AXL	black
cDC	CMPK2	black
cMo	B2M	black
cMo	PARN	black
cMo	TRAPPC2	black
T	CTD-2095E4.5	black
PMN	PARP12	black
pDC	HESX1	black
pDC	CD38	black
pDC	TNFSF13B	black
cMo	SLC12A7	black
cMo	CD38	black
cDC	IFI6	black
PMN	HMGN1P35	black
cMo	RP11-609D21.3	black
cDC	NEXN	black
cMo	LA16c-360H6.2	black
cMo	GLULP4	black
cMo	AIG1	black
T	RP13-104F24.1	black
cMo	KMO	black
T	NFKBIL1	black
PMN	TBC1D25	black
cMo	GPKOW	black
cMo	IRF8	black
pDC	COX5A	black
PMN	HMGN2	black
pDC	LGALS9B	black
T	SMC4	black
T	ADAR	black
cMo	RP11-538P18.2	black
pDC	MOV10	black
T	BST2	black
cDC	NRIR	black
PMN	WDFY1	black
cMo	TAP1	black
cDC	SSB	black
T	PHF11	black
pDC	USP41	black
PMN	DNAJC13	black
cMo	RP11-69H7.3	black
pDC	PHF11	black
PMN	CXorf21	black
cMo	IL4I1	black
pDC	STX2	black
cMo	IFIT3	black
cMo	RABGAP1L	black
cMo	GBP4	black
cMo	CNBP	black
T	CYBB	black
pDC	RUFY4	black
cMo	FGD2	black
pDC	U1	black
cMo	APLP2	black
cMo	HLA-F	black
cDC	BISPR	black
cDC	SNX2	black
pDC	RP11-325E14.5	black
cMo	CLEC12B	black
T	PMAIP1	black
cMo	ISG15	black
cMo	RP11-611O2.3	black
T	DHRS4L2	black
cMo	IFI6	black
cMo	IFI30	black
PMN	RUBCN	black
cMo	MT-TL1	black
T	CTD-2357A8.2	black
cMo	CTD-2616J11.11	black
PMN	EPSTI1	black
cMo	PARP10	black
cMo	RP11-426L16.3	black
cMo	APOBEC3B	black
B	SERPING1	black
PMN	TBK1	black
PMN	HMGN4	black
cDC	CTC-308K20.3	black
PMN	LARP7	black
T	SERPING1	black
PMN	NBPF25P	black
T	FKBP4	black
T	RP11-468E2.4	black
T	SAMD9	black
cDC	RP1-313L4.4	black
PMN	TRIM56	black
pDC	RP1-12G14.9	black
T	CTC-301O7.4	black
T	IFIT2	black
pDC	STAT1	black
cMo	RP11-544I20.2	black
cMo	RNF213	black
PMN	RIN2	black
cMo	RP11-389G6.4	black
cDC	MX2	black
cMo	GTPBP1	black
cMo	SAMD9L	black
cMo	RP11-274E7.2	black
T	CTC-448F2.3	black
cMo	RP11-219B4.5	black
pDC	C5orf56	black
PMN	ELK4	black
PMN	RPS6P20	black
cMo	TIMM8A	black
cMo	RP4-753P9.3	black
T	RN7SL141P	black
cDC	AP001610.5	black
pDC	PLSCR1	black
PMN	PRKAG2	black
pDC	CXCR2P1	black
cMo	IMPACT	black
PMN	TARBP1	black
cMo	AC005150.1	black
cDC	RN7SL752P	black
cMo	ZNF483	black
cMo	LAP3P2	black
B	CTA-384D8.34	black
cDC	MT-TT	black
cMo	AP001610.5	black
cMo	GBP5	black
cMo	UQCRFS1	black
T	XAF1	black
pDC	STOM	black
cMo	UBE2I	black
cMo	IFITM9P	black
cDC	RP11-66B24.2	black
T	ZCRB1	black
pDC	COX5AP2	black
PMN	ATP6V0B	black
cMo	DPYSL2	black
cMo	RAB8A	black
pDC	TNFSF10	black
cDC	PSMA4	black
T	IFI44	black
pDC	RORA	black
cMo	ADAR	black
cMo	DALRD3	black
pDC	PDE7A	black
cMo	RTP4	black
cMo	DHX58	black
pDC	RP11-727A23.7	black
cMo	GCN1	black
cMo	NPC2	black
pDC	OASL	black
pDC	CTD-2095E4.5	black
T	CTD-2521M24.6	black
cMo	SNAPC3	black
cMo	USP3	black
pDC	FAM46A	black
T	NUP37	black
cDC	PARP9	black
cMo	2020-09-07	black
T	OASL	black
cDC	EIF2AK2	black
cMo	CYSLTR1	black
B	MCTP1	black
cMo	LGALS9DP	black
T	RP1-71H24.1	black
cMo	LAP3	black
cMo	SETD2	black
pDC	LGALS9	black
T	GBP4	black
cMo	MOV10	black
cMo	STAU1	black
T	RSAD2	black
B	APOBEC3B-AS1	black
cMo	ZC3HAV1	black
cMo	PSMB10	black
cMo	MX1	black
T	CTD-2562J15.4	black
PMN	HMGN1P38	black
cMo	IDH3B	black
pDC	RP11-609D21.3	black
pDC	MTHFD1L	black
T	TTC21A	black
cMo	CYBB	black
T	SAMD9L	black
cMo	CD2AP	black
PMN	MT2P1	black
cMo	LEPROTL1	black
cDC	SAP30L-AS1	black
T	ZNF540	black
PMN	MT2A	black
T	RP11-161H23.5	black
pDC	RARRES3	black
PMN	MT1P1	black
pDC	HNRNPA3P6	black
cMo	AC090505.4	black
T	MZT2B	black
T	EIF2AK2	black
cMo	UBE2L6	black
pDC	RP4-725G10.3	black
T	RRM1	black
cMo	CNP	black
PMN	FAM46A	black
PMN	SERPING1	black
PMN	FAM192A	black
cMo	ANXA7	black
cDC	USP30-AS1	black
T	MRPL52	black
cMo	HCG4P11	black
T	AK2	black
pDC	GMPR	black
PMN	PARP14	black
T	TRIM22	black
T	MRPL1	black
T	EIF4A1P2	black
cMo	PARP9	black
cMo	KRT10	black
cDC	IFIT1	black
cMo	VRK2	black
PMN	CCRL2	black
cMo	CXCR2P1	black
cMo	PATL1	black
pDC	IFIT3	black
cDC	ANGPTL6	black
B	ODF3B	black
PMN	ROCK2	black
cMo	GPBP1	black
cMo	MIR371A	black
cMo	DNAJC8P1	black
cMo	C9orf72	black
PMN	PTGES3P1	black
cMo	RP11-322E11.2	black
T	AC007899.3	black
cMo	LINC01291	black
T	SUMO2P7	black
PMN	GCH1	black
T	KLHDC7B	black
cMo	PARP12	black
T	SHISA5	black
cMo	ZNF496	black
PMN	HERC6	black
cDC	CTD-2240E14.4	black
cDC	MAB21L3	black
cMo	OAS2	black
PMN	RP11-337C18.10	black
T	RP11-609D21.3	black
cMo	PRR13	black
cMo	UBE2D3	black
cMo	ITM2B	black
T	PARP14	black
cMo	PSMA4	black
T	SUPT4H1	black
PMN	NBPF11	black
PMN	AC007919.18	black
cDC	RP11-434P11.1	black
T	IFI44L	black
PMN	APOL3	black
pDC	CPEB2	black
cMo	SP140L	black
cMo	RAP1B	black
PMN	POT1	black
T	SUOX	black
T	HIST1H4C	black
T	CALM2P3	black
T	HERC5	black
cMo	IL15	black
cMo	POLR2L	black
pDC	CMPK2	black
T	RP11-415K20.1	black
cMo	ALG3	black
T	GNL2	black
cDC	LINC01481	black
pDC	HERC6	black
PMN	IQGAP1	black
T	AKAP2	black
cMo	IL27	black
PMN	RP11-85B7.5	black
cMo	CMPK2	black
cMo	LY96	black
PMN	RBM43	black
T	CDC42P1	black
cMo	DDX60L	black
PMN	LAP3	black
cMo	RPS3AP53	black
PMN	SNHG6	black
cMo	IFNAR2	black
pDC	RP11-396M11.1	black
PMN	RP11-609D21.3	black
cMo	SNORD89	black
PMN	SNW1	black
pDC	CTD-2527I21.9	black
cMo	JAK2	black
cDC	RSAD2	black
cDC	BST2	black
PMN	LGALS9DP	black
PMN	BUD31	black
T	TMSB4XP2	black
T	DTX3L	black
PMN	STAP1	black
cDC	HERC5	black
pDC	RBBP6	black
PMN	MAD2L1BP	black
cMo	ITGAE	black
cDC	RP11-18I14.11	black
cMo	MTHFR	black
cMo	HERPUD2	black
cMo	IRF7	black
cMo	AC016577.1	black
cMo	HSH2D	black
pDC	NAMPTP1	black
T	NBPF3	black
B	CXCL10	black
cMo	TOR1B	black
T	DDX60L	black
cMo	IFI44	black
B	RP4-725G10.3	black
PMN	TRIM38	black
PMN	TBL1X	black
pDC	C19orf66	black
cMo	DDX60	black
PMN	SSB	black
cDC	ZBP1	black
cMo	RP11-546B8.5	black
T	SIGLEC1	black
cMo	EIF2AK2	black
cDC	OAS2	black
cMo	PALB2	black
PMN	GPRC5C	black
PMN	RP11-206F17.2	black
pDC	IFITM2	black
pDC	RNF213	black
PMN	DDAH2	black
PMN	RAB11FIP2	black
pDC	TRIM25	black
PMN	JPX_1	black
pDC	SP140L	black
cMo	TCN2	black
PMN	HMGN2P36	black
cMo	FMR1	black
PMN	IRF7	black
T	ATF4P4	black
T	BUD31	black
PMN	ATG12	black
cMo	FYB	black
cMo	APOL6	black
T	C16orf87	black
pDC	XAF1	black
T	ZCCHC10	black
cMo	PSME2P2	black
cDC	HERC6	black
T	LRRC27	black
cMo	CASC4	black
T	IFI30	black
cMo	EIF3G	black
T	RP11-168J18.6	black
pDC	PARP9	black
PMN	ERAP2	black
T	MYD88	black
cMo	PSME1	black
cMo	DYNC1I2	black
cDC	ODF3B	black
cDC	PSME2P2	black
pDC	DNAJC9	black
B	TSPAN2	black
cMo	SAR1A	black
PMN	GAPDHP68	black
cMo	RP11-44K6.4	black
PMN	C3orf38	black
cMo	CTB-13F3.1	black
cDC	HLA-DQA2	black
PMN	CCDC18-AS1	black
PMN	PLAC8	black
pDC	NRIR	black
PMN	SNORA16A	black
cMo	RP11-204C16.4	black
cMo	BAX	black
cMo	SHPK	black
cMo	RP11-583F2.1	black
cMo	DNASE2	black
cMo	PSMB9	black
cMo	RP11-516C1.1	black
B	AC008984.7	black
pDC	ODF3B	black
PMN	PHF6	black
B	CSF2RBP1	black
PMN	AC084219.4	black
T	RP11-585F1.6	black
PMN	DHX37	black
cDC	IFIH1	black
cMo	RP11-16N2.1	black
PMN	CDK17	black
cDC	RP11-624L12.1	black
pDC	BISPR	black
cDC	RP11-697E22.2	black
PMN	XAF1	black
T	RP11-274E7.2	black
cDC	C2orf49	black
T	RP1-28O10.1	black
PMN	MYO18A	black
PMN	DDX60	black
cMo	RP11-396M11.1	black
PMN	CH17-189H20.1	black
pDC	DENND5A	black
T	RN7SL2	black
pDC	STAP1	black
cMo	ARL13B	black
cMo	APOBEC3C	black
PMN	PARP11	black
cMo	GBP2	black
cDC	LA16c-17H1.3	black
PMN	TTF2	black
cMo	FTSJ1	black
pDC	TCAF2	black
cMo	MIR6859-4	black
T	MS4A6A	black
T	NFKBIB	black
cDC	TRIM5	black
pDC	GFER	black
PMN	JPX	black
T	TMSB4X	black
cMo	SHISA5	black
cMo	LA16c-358B7.3	black
T	LSM1	black
pDC	DANCR	black
cMo	FAM46A	black
cMo	SERINC1	black
cMo	MTCO3P11	black
cDC	IFITM1	black
PMN	ERP29	black
PMN	IFIH1	black
PMN	RPL12P38	black
PMN	TTC8	black
B	TNFSF10	black
pDC	RP11-37B2.1	black
cMo	PAN3	black
cMo	KLHL33	black
PMN	RP11-810M2.2	black
pDC	MYD88	black
cMo	SHOX	black
cMo	RP11-116D17.4	black
T	KLHL26	black
cMo	CECR1	black
PMN	RIMKLB	black
cMo	SEC62-AS1	black
T	RN7SL4P	black
cDC	TWF1	black
pDC	CTD-2369P2.5	black
cMo	IFI35	black
pDC	TCAF1P1	black
cMo	CISH	black
cMo	CBX3P1	black
cMo	ZC3H3	black
PMN	MT-RNR2	black
cMo	SMIM4	black
pDC	IGSF6	black
cDC	RP4-725G10.3	black
cMo	GTF2F1	black
cMo	DPYD	black
cMo	RP11-599B13.6	black
T	UBC	black
T	AZI2	black
pDC	RBCK1	black
cMo	GS1-124K5.11	black
PMN	APOBEC3B-AS1	black
T	MCM4	black
PMN	FSD1L	black
PMN	VAMP5	black
pDC	IFITM9P	black
cMo	SNORA26	black
T	ARHGAP11B	black
cMo	RP11-59N23.3	black
pDC	ANGPTL6	black
pDC	CHCHD3P3	black
PMN	C18orf25	black
pDC	ADAM9	black
cMo	CHD8	black
T	PSME1	black
pDC	NFE2L3	black
PMN	NCOA7	black
PMN	TRIM69	black
pDC	SCARNA17	black
pDC	HERC5	black
cMo	CTD-2659N19.10	black
PMN	IFI44	black
PMN	TRIM26	black
T	ITGA4	black
cDC	DDX60	black
cMo	RP11-671J11.5	black
PMN	RARRES3	black
T	MPP7	black
pDC	RP11-467L13.5	black
pDC	IDH3A	black
T	DHRS4L1	black
PMN	CDC26	black
cMo	IFITM2	black
PMN	AL590762.6	black
cMo	MRPS18C	black
B	MS4A4A	black
cDC	SHANK2-AS3	black
cMo	CDC42	black
cDC	OASL	black
cMo	STAT2	black
cMo	TEP1	black
cMo	C6orf62	black
pDC	DDX58	black
T	VMA21	black
cDC	IL1RAP	black
PMN	SIDT1-AS1	black
PMN	RHOC	black
PMN	MICA	black
cMo	DUSP7	black
cMo	KIAA1715	black
PMN	RPS26P8	black
cMo	FAM21C	black
cMo	NSFP1	black
PMN	CMC1	black
PMN	IFI44L	black
PMN	RAB3GAP1	black
T	ZMAT2	black
pDC	TRIM22	black
cMo	STK16	black
T	PPIF	black
T	COX6A1	black
cMo	RP4-620F22.2	black
T	RUVBL1	black
PMN	LY6E	black
cDC	TFDP2	black
T	RP11-467H10.2	black
cDC	RNF213	black
pDC	BST2	black
PMN	MOV10	black
cMo	RPS3AP49	black
T	P2RY8	black
cMo	AL078584.1	black
cMo	RFFL	black
pDC	IGHVII-20-3	black
cDC	RN7SL525P	black
pDC	HIST1H1PS1	black
cMo	RP5-1180E21.5	black
pDC	SWI5	black
PMN	LGALS9	black
PMN	PHF11	black
pDC	RN7SL711P	black
cMo	CTC-425F1.4	black
T	RN7SL200P	black
T	AZIN2	black
cMo	ODF3B	black
pDC	ADAR	black
pDC	HOXB2	black
cDC	SLC22A4	black
cMo	PARP15	black
pDC	CXorf56	black
pDC	BX255923.2	black
T	FAR2	black
cMo	ADGRE5	black
cMo	RP11-258F22.1	black
PMN	GBP1P1	black
pDC	MILR1	black
cDC	NMI	black
PMN	TOPORS-AS1	black
cMo	DTX3L	black
cDC	IRF7	black
PMN	SMIM20	black
PMN	BST2	black
PMN	ZNF684	black
cMo	ADCY7	black
pDC	UBE2L6	black
PMN	CCDC153	black
PMN	CIR1	black
cDC	KLHDC7B	black
cDC	AC127391.3	black
PMN	HMGN2P15	black
PMN	PARP10	black
T	IFIT3	black
PMN	MITD1	black
cDC	RP11-105C19.1	black
cMo	IGFLR1	black
cMo	FAM127B	black
pDC	MX1	black
cMo	RP11-3D23.1	black
PMN	MTRNR2L12	black
pDC	NAMPT	black
cDC	GMPR	black
T	LGALS9B	black
T	MYO1E	black
PMN	LSM3	black
cMo	ITCH	black
T	DLEU2_3	black
cDC	RP11-467L13.5	black
cMo	SP110	black
cMo	SNHG20	black
cMo	NRIR	black
PMN	RP11-489M13.1	black
PMN	ZMAT5	black
cMo	RAB3IP	black
T	HSH2D	black
PMN	HMGN2P31	black
T	IL13RA1	black
PMN	NT5C3A	black
cMo	U2AF2	black
PMN	MTRNR2L10	black
PMN	SNX20	black
T	APOBEC3A	black
PMN	LCP2	black
T	KPNA2	black
cMo	SLAMF7	black
pDC	CTD-2521M24.6	black
T	UBR2	black
cMo	NT5C3A	black
T	CHMP5	black
pDC	RP11-382A20.5	black
pDC	FUT8	black
pDC	AC007899.3	black
PMN	THOC7	black
cMo	AC116366.6	black
PMN	FAM45BP	black
T	MT2P1	black
cMo	S100A11	black
T	CD83	black
cDC	NT5C3A	black
T	RHOB	black
cMo	DEGS2	black
T	ATF4P3	black
PMN	ISG15	black
PMN	TIMM10	black
cMo	PLAC8	black
T	HLA-G	black
T	HIST1H2AM	black
cMo	SERPINA1	black
cMo	DYNLT1	black
cMo	SRGAP2D	black
T	COX7BP2	black
T	PUS10	black
cMo	SNX4	black
cMo	RP11-300J18.2	black
PMN	CNP	black
pDC	DYNLT1	black
cMo	CST3	black
cMo	MICAL1	black
cMo	MYD88	black
PMN	SMIM14	black
B	TYMP	black
PMN	IFIT1	black
T	RN7SL5P	black
pDC	FCHSD2	black
B	TMEM176A	black
pDC	IMMP1L	black
pDC	SAMD9	black
pDC	BATF3	black
cDC	RPS2P28	black
PMN	FRG1HP	black
PMN	MFAP1	black
pDC	HAPLN3	black
cMo	RP11-546M21.6	black
PMN	C17orf75	black
cMo	TRIM22	black
pDC	USP25	black
cMo	RP11-145P16.2	black
cMo	RPS4X	black
PMN	ARF4-AS1	black
PMN	CHRNB1	black
PMN	PRDX5	black
cMo	CTC-539A10.7	black
PMN	MTRNR2L8	black
T	BTBD10	black
cMo	RBCK1	black
pDC	URGCP	black
pDC	FBXO6	black
PMN	RSAD2	black
pDC	EAF2	black
pDC	OAS2	black
cMo	LPP	black
pDC	PSMB9	black
cMo	CXCL10	black
cDC	SAMD9	black
T	MT-ND4	black
cMo	AC113404.1	black
cMo	RP11-242D8.1	black
cMo	ZPR1	black
cDC	CBWD5	black
T	PCK2	black
PMN	FTLP2	black
cMo	RHOG	black
pDC	FYB	black
PMN	STAT2	black
T	SNORD100	black
PMN	AP000769.1	black
cDC	FANCL	black
cMo	EIF1	black
pDC	RP11-61L23.2	black
T	BAX	black
cMo	RN7SL622P	black
pDC	ANXA2R	black
cMo	E2F3P2	black
cDC	AC079807.3	black
cMo	GPR65	black
PMN	FAM45A	black
PMN	RP11-805I24.1	black
pDC	LEPROTL1	black
cMo	KB-1836B5.1	black
cMo	POLR2M	black
T	ISG20	black
PMN	SP100	black
PMN	IFITM1	black
pDC	AP001610.5	black
cMo	MROH1	black
PMN	LINC01554	black
PMN	HMGN2P6	black
pDC	PLBD2	black
pDC	SCLT1	black
cDC	IFIT5	black
cMo	ZNF675	black
T	MTND6P4	black
cMo	MOB1A	black
PMN	RP11-15J10.1	black
PMN	TOR3A	black
PMN	RP11-90P5.1	black
B	HES4	black
T	GPX1P2	black
cMo	SRGAP2C	black
PMN	MX2	black
pDC	GBP5	black
PMN	MT-ND3	black
cDC	HIST2H2AA3	black
PMN	APOL6	black
cMo	RP11-638I2.10	black
cMo	AC007326.1	black
cMo	LGALS9B	black
cMo	CLIC2	black
cMo	RP11-277A4.4	black
cMo	SP100	black
cMo	EEF1B2P6	black
PMN	NBPF8	black
cMo	SCD5	black
T	ATP5E	black
pDC	RAB22A	black
cDC	TDRD7	black
pDC	LGALS9DP	black
cMo	RP11-83M16.5	black
pDC	NAPA	black
T	TMSB4XP6	black
cMo	GS1-174L6.4	black
pDC	ENPP2	black
pDC	AC116366.6	black
PMN	CLTC	black
T	EIF4A1P4	black
pDC	CTBS	black
cMo	EAPP	black
pDC	FABP5P1	black
PMN	MPLKIP	black
pDC	STAT2	black
cMo	RP11-401L13.4	black
PMN	IFIT5	black
cMo	CUL1	black
cMo	RPS19BP1	black
T	HIVEP2	black
PMN	HNRNPLL	black
cMo	LILRP1	black
PMN	HES4	black
cMo	RPLP0P6	black
cDC	DHX58	black
cMo	DHDDS	black
PMN	PRDX3	black
cMo	PTPA	black
cDC	RP11-452N17.1	black
cMo	PELI2	black
PMN	GBP1	black
cMo	RP11-680B3.2	black
PMN	MT-RNR1	black
PMN	ZNF321P	black
PMN	EMC9	black
cMo	TRIM56	black
pDC	FNDC3B	black
PMN	ZCRB1	black
pDC	TFEC	black
pDC	TRIM69	black
cMo	C1GALT1	black
cMo	MYOF	black
PMN	TLE4	black
PMN	PLSCR1	black
T	BISPR	black
T	POLA2	black
PMN	PPM1K	black
PMN	GBP5	black
cMo	RP11-585F1.6	black
PMN	U2AF1	black
cMo	AC097523.1	black
pDC	RN7SL809P	black
PMN	IFIT3	black
T	TMSB4XP4	black
pDC	EMBP1	black
PMN	U91328.21	black
cMo	SBF2	black
cDC	MT-TL1	black
PMN	FTX	black
T	UIMC1	black
T	NAT14	black
PMN	MRPS18C	black
pDC	NLRC5	black
T	AMD1	black
T	RP11-396M11.1	black
cMo	RUFY4	black
PMN	PTPN9	black
T	AC000041.8	black
cMo	RP11-529K1.3	black
PMN	AP000580.1	black
PMN	ZBP1	black
cDC	TRIM22	black
PMN	PHTF2	black
cMo	CAPN2	black
cMo	SAMD9	black
PMN	PATL1	black
T	HLA-DQA1	black
pDC	CTC-308K20.3	black
cMo	CMTR1	black
T	DHRS4	black
pDC	PML	black
cMo	IL1RN	black
cMo	AC055733.1	black
cDC	RBMS3-AS2	black
cMo	RSAD2	black
pDC	C1QBPP2	black
PMN	TUBGCP2	black
PMN	CASP1	black
PMN	C5orf56	black
pDC	PRKAG2	black
cMo	RP11-611O2.5	black
T	SLC25A5P5	black
PMN	AC009948.5	black
cMo	RP11-313D6.3	black
cMo	AC034198.7	black
PMN	C19orf66	black
pDC	TLK1	black
pDC	CTC-506B8.1	black
T	HIRA	black
cMo	RPSAP26	black
PMN	POLB	black
cMo	ETV7	black
PMN	OASL	black
cDC	HLA-DRB9	black
PMN	TRIM22	black
T	RP4-665N4.8	black
PMN	AC007192.6	black
T	OIP5	black
PMN	CEACAM1	black
cMo	PML	black
cMo	ZNF18	black
pDC	SP100	black
PMN	FTL	black
pDC	DDX60L	black
cMo	SLC35B4	black
cDC	IFITM3	black
pDC	USP30-AS1	black
PMN	MTRNR2L6	black
PMN	BORCS8	black
PMN	INPPL1	black
B	RP11-347C12.10	black
PMN	NT5C3AP1	black
cDC	LSM3P2	black
cMo	ZC3H4	black
PMN	APOBEC3A	black
PMN	MT-TL1	black
T	IFI16	black
cDC	RNU6-3P	black
PMN	TNFSF13B	black
cMo	IFIT2	black
PMN	RP4-725G10.3	black
PMN	ZCCHC2	black
cMo	RP5-1115A15.1	black
cMo	MYL12BP2	black
PMN	RP4-620F22.2	black
cMo	YWHAZP2	black
PMN	FTLP3	black
PMN	MESDC2	black
cMo	RPL5P4	black
cMo	GBP1	black
T	CEP164	black
cMo	PDIA3P1	black
pDC	CXorf38	black
PMN	SCNM1	black
B	EPS8	black
T	FGFR1OP	black
cMo	XPO7	black
PMN	TREX1	black
PMN	IFI35	black
PMN	YAF2	black
cMo	PSAP	black
cDC	AC005944.2	black
PMN	SFT2D1	black
PMN	CMPK2	black
cMo	FBXO6	black
cDC	CHMP5	black
pDC	PSPC1	black
PMN	OAS2	black
pDC	RP11-137J7.3	black
pDC	PPIAL4A	black
PMN	NBPF9	black
PMN	EEF1DP1	black
cDC	GTPBP2	black
cMo	RP11-122G18.7	black
PMN	ZW10	black
pDC	SLFN12	black
PMN	PSME2	black
pDC	ZNF815P	black
cDC	CTC-436P18.1	black
PMN	IFITM3	black
PMN	CHMP5	black
cMo	RP13-383K5.4	black
cMo	EEF1A1P24	black
cDC	CBWD7	black
PMN	TNFSF10	black
cMo	RP11-1250I15.3	black
PMN	MT-CYB	black
cMo	ANGPTL6	black
cDC	PSME2	black
PMN	CLEC2B	black
cMo	FTLP6	black
cMo	RN7SL716P	black
PMN	UBE2L6	black
pDC	HCG4P11	black
PMN	PARP9	black
cMo	YWHAZP5	black
PMN	ACO1	black
T	FEN1	black
pDC	SP110	black
cMo	APOBEC3F	black
pDC	MCFD2	black
cDC	RPS2P6	black
cMo	THOC2	black
cMo	EEF1B2	black
pDC	LGALS9C	black
PMN	NBPF15	black
cMo	RP11-537A6.9	black
cMo	RP11-57H14.2	black
PMN	FAM157B	black
cDC	RP11-351I24.1	black
PMN	ELF1	black
PMN	AP001610.5	black
PMN	EHD3	black
PMN	2020-09-04	black
cMo	HLA-A	black
PMN	MX1	black
cMo	SRSF4	black
cMo	ST3GAL5	black
T	APLF	black
cMo	CXorf38	black
B	ATP10A	black
cMo	LILRB4	black
cMo	CCNJ	black
cDC	RP3-477O4.14	black
cMo	TIPARP	black
PMN	GABARAPL2	black
pDC	NT5C3A	black
pDC	HLA-F	black
cMo	AC004257.1	black
cMo	RN7SL784P	black
cDC	RP11-44M6.3	black
cDC	LINC00598	black
PMN	FBXO6	black
T	TMSB4XP1	black
cMo	RPL32P1	black
cMo	DMXL1	black
pDC	SIDT1-AS1	black
T	RP11-111M22.2	black
cMo	WASH3P	black
pDC	CAMKK2	black
T	ZNF326	black
PMN	SAT1	black
pDC	KDELC2	black
cDC	RP11-304L19.2	black
PMN	ODF3B	black
cMo	VPS13D	black
cMo	RPL23	black
cMo	NDST2	black
pDC	TMCC3	black
cDC	IMMP1L	black
cMo	RSPH3	black
PMN	AC005150.1	black
cDC	SP140	black
pDC	HACD4	black
cDC	B2M	black
PMN	RP11-83A24.2	black
cMo	CERKL	black
cMo	CSNK1E	black
PMN	CH17-333M13.2	black
cDC	PSMB10	black
cMo	EEF1A1P4	black
PMN	CCDC146	black
pDC	RP11-35G9.5	black
PMN	CATIP-AS1	black
cMo	CTC-338M12.6	black
cDC	RABGAP1L	black
cDC	CBWD3	black
PMN	RP11-101E13.5	black
cDC	RP11-1094M14.1	black
cMo	RP11-481J2.4	black
pDC	VCPIP1	black
PMN	DDX60L	black
cMo	GTF3C6	black
pDC	ICAM3	black
cDC	RP11-493P1.2	black
cMo	NCOA7	black
T	SP110	black
T	ATHL1	black
cMo	C18orf32	black
cMo	RP11-407G23.7	black
pDC	SNORA14A	black
PMN	CTRL	black
PMN	C2orf69	black
PMN	RP11-495P10.1	black
pDC	RTP4	black
cDC	S100A6	black
pDC	CALML4	black
T	CARHSP1	black
cMo	RP11-214O14.1	black
B	TJP2	black
cMo	MYL12BP1	black
pDC	RPAP3	black
T	RP11-198M15.1	black
cDC	IFI35	black
cMo	RP11-496N12.9	black
cMo	AC006483.5	black
pDC	ITGA4	black
PMN	PTCD1	black
T	SNRPEP4	black
cMo	YWHAZP4	black
PMN	OAS3	black
PMN	RAB12	black
pDC	HLA-A	black
T	RP11-214N16.2	black
cMo	RP11-295B17.6	black
PMN	DYNLRB1	black
T	PPIAL4E	black
cMo	SARAF	black
cMo	RP11-100N21.1	black
pDC	MCCC2	black
cMo	ZMIZ1	black
T	CTD-2240E14.4	black
T	TREX1	black
cDC	RP3-486I3.4	black
pDC	EFHD2	black
cMo	CBR1	black
PMN	CTC-325J23.2	black
PMN	SAMHD1	black
pDC	TRIM34	black
T	TATDN3	black
pDC	ANKRD22	black
cMo	NMI	black
PMN	GBP4	black
PMN	GIMAP2	black
cMo	RPL15P3	black
cMo	TCF7L2	black
PMN	MYL8P	black
PMN	CTD-2047H16.5	black
cDC	RNU5A-3P	black
T	BAK1	black
pDC	IFI16	black
cDC	SCAPER	black
PMN	SAMD9	black
pDC	A1BG-AS1	black
cMo	RP11-89G4.1	black
cMo	VDAC1P8	black
T	RP11-269M20.1	black
T	BTF3P12	black
cMo	LCP2	black
B	ICAM4	black
PMN	STX17	black
T	RN7SL336P	black
cMo	TROVE2	black
PMN	HEIH	black
PMN	H2AFZ	black
cMo	RP11-216N14.9	black
pDC	MB21D1	black
PMN	FGFR1OP2	black
cMo	MBD2	black
T	GPX1	black
[truncated: 99,284 more rows]
